# Supplementary material for: β-catenin driven innate and metabolic reprograming in macrophages fuel T-cells dependent inflammation in Toxoplasma gondii infection: implications for therapeutic intervention
Source: Research Square preprint supplement (doi:10.21203/rs.3.rs-8453530/v1), 2026-02-09
Supplement: Supplementary file 1 [file 754f852645d5f8fed0bf7426.docx]

**Data analysis:**

i. FlowJo v 10.10, ii. ImageJ software, iii. Carl-Zeiss (Zen Blue software, Ziess Zen 3.8 software), iv. Illumina platform (Trimmomatic v0.39 , STAR aligner v2.7.10a, DESeq2, ClusterProfiler v4.2.2), v. Compound Discoverer software, vi. MetaboAnalyst 6.0, vii. GraphPad Prism 9.0, viii. Seahorse wave software v2.6.3.5

**Accession codes, unique identifiers, or web links for publicly available datasets:**

The whole transcriptome data generated in this study have been deposited in the NCBI-Sequence Read Archive (SRA) database and are publicly accessible with the accession number PRJNA1212584 (<https://dataview.ncbi.nlm.nih.gov/object/PRJNA1212584?reviewer=1cfkp5jci4frqrmb37jdfup1r6>).

**Randomization:**

To minimize selection bias and ensure the reliability of experimental outcomes, we employ randomization in assigning mice to experimental groups. Mice are ordered through the institutional online portal by specifying age and weight only, without gender selection (online record has been maintained). Upon transfer from the breeding to the experimental facility—managed independently by the animal house authorities—the researchers have no control over individual selection of mice. Random allocation of mice helps ensure that any biological variability (including potential sex-based or genetic differences) is equally distributed across groups, thereby enhancing the validity and reproducibility of our immunological findings.

**Blinding:**

Transcriptomic analysis, flow cytometry, and metabolite profiling via mass spectrometry were each performed by three independent institutional technical experts who were blinded to the experimental details and group assignments. This blinding ensured that data acquisition and analysis were conducted without any conscious or unconscious bias, thereby preserving the objectivity, integrity, and reliability of the experimental results.

**Laboratory animals:**

All animal procedures were approved by the Institutional Animal Ethics Committee (IAEC#586/21 & IAEC/DS/PN/2023/199). For in vivo infection, we used the C57BL/6/j wildtype (Wt) mice, B6.OTII (JAX:004194),IRF4 knockout (JAX:031834) and IFN-γ knockout (JAX:002287) mice were originally obtained from Jackson Laboratory and maintained in National Institute of Immunology core mouse breeding facility, and ctnnb1flox/flox mice (β-cateninflox) was originally gift from IIT, Kanpur, and was maintained in B6 background. β-cateninflox mice were crossed with transgenic mice (B6.129P2-Lyz2tm1-cre-Ifo/J) expressing Cre recombinase under the control of a lysozyme 2 gene (Lyz2) promoter, to generate mice lacking β-catenin in monocytes, mature macrophages and granulocytes (β-catΔMΦ). Successful cre-mediated deletion was confirmed by polymerase chain reaction (PCR) and protein expression analyses. Mice were ordered through the institutional online portal by specifying age (5–6 weeks) and weight (20–22 g), without selection for gender.
