# Supplementary material for: β-catenin driven innate and metabolic reprograming in macrophages fuel T-cells dependent inflammation in Toxoplasma gondii infection: implications for therapeutic intervention
Source: Research Square preprint supplement (doi:10.21203/rs.3.rs-8453530/v1), 2026-02-09
Supplement: Supplementary file 2 [file CD4_Metabolites_final.xlsx]

## Sheet: Sheet1
Sample	CD4+1	CD4+2	CD4+3	CD4+ I8	CD4+ I9	CD4+ I11	CD4+ I+D1	CD4+ I+D2	CD4+ I+D3	CD4+ U+D1	CD4+ U+D2	CD4+ U+D3	avg(uninfected)	CD4+ I8	CD4+ I9	CD4+ I11	CD4+ I+D1	CD4+ I+D2	CD4+ I+D3	CD4+ U+D1	CD4+ U+D2	CD4+ U+D3
Label	UNINFECTED	UNINFECTED	UNINFECTED	INFECTED	INFECTED	INFECTED	INFECTED+D	INFECTED+D	INFECTED+D	UNINFECTED+D	UNINFECTED+D	UNINFECTED+D		INFECTED	INFECTED	INFECTED	INFECTED+D	INFECTED+D	INFECTED+D	UNINFECTED+D	UNINFECTED+D	UNINFECTED+D
C00135	418680	345384	337319	373125	567197	389591	453232	481765	370933	366087	429219	438721	364284	1.02427	1.55702	1.06947	1.24417	1.3225	1.01825	1.00495	1.17825	1.20434
C00328	425888	398785	361285	375827	412006	401812	384659	338802	344181	387984	389029	396769	383498	0.979996	1.07434	1.04775	1.00303	0.883449	0.897476	1.0117	1.01442	1.0346
C00490	393439	323023	332151	362690	414228	412700	342075	324241	307708	344734	368039	370342	341952	1.06064	1.21136	1.20689	1.00036	0.948205	0.899857	1.00814	1.07629	1.08302
C00878	355217	295984	317079	324879	373986	372607	321826	292873	297523	311244	304963	324261	316887	1.02522	1.18019	1.17584	1.01559	0.92422	0.938894	0.982194	0.962372	1.02327
C01489	200454	123246	112938	153077	194595	179509	148134	157620	132469	134769	137869	149450	144637	1.05835	1.3454	1.2411	1.02418	1.08976	0.915872	0.931772	0.953206	1.03328
C01591	1.53231e+08	1.04736e+09	3.74196e+08	6.8489e+09	2.01034e+08	2.04306e+08	9.18134e+09	6.57665e+09	7.06098e+09	2.25089e+08	6.3876e+09	7.30364e+09	2.74804e+09	2.49228	0.0731552	0.074346	3.34105	2.39321	2.56946	0.0819087	2.32442	2.65776
C01595	1.49473e+06	547150	565432	823367	2.43603e+06	1.0544e+06	714090	962792	630399	735723	762977	830923	820577	1.0034	2.96868	1.28495	0.870229	1.17331	0.768239	0.896593	0.929806	1.01261
C01904	235889	139174	136451	185277	230462	231792	179207	205033	167271	157467	164874	169065	170172	1.08876	1.35429	1.36211	1.05309	1.20486	0.982951	0.925343	0.968865	0.993496
C02837	1.00563e+06	1.46755e+06	2.29218e+06	1.24338e+06	1.19251e+06	1.15596e+06	1.16687e+06	1.11026e+06	1.62734e+06	1.19582e+06	1.20723e+06	1.32134e+06	1.42502e+06	0.87254	0.836841	0.811191	0.818844	0.779117	1.14198	0.839161	0.847168	0.927244
C06940	266880	252044	251756	356868	266451	273254	350530	280236	335926	367362	352114	425167	285302	1.25084	0.933926	0.957773	1.22863	0.982246	1.17744	1.28763	1.23418	1.49024
C06953	473133	532191	519098	522837	491921	519491	494018	495011	506291	518455	496928	510140	503253	1.03892	0.977483	1.03227	0.98165	0.983624	1.00604	1.03021	0.987433	1.01369
C07063	459726	418507	432378	522630	3.1296e+07	2.26542e+07	488163	536081	436468	453226	493044	478662	439285	1.18973	71.243	51.5706	1.11127	1.22035	0.993586	1.03173	1.12238	1.08964
C08475	824936	913917	931468	1.00498e+06	853475	883697	950133	1.02305e+06	930281	921578	952202	943023	911483	1.10257	0.936359	0.969515	1.0424	1.1224	1.02062	1.01108	1.04467	1.0346
C08691	280659	292124	305663	349145	305850	315863	351122	380734	331772	330992	329238	324537	300706	1.16108	1.01711	1.05041	1.16766	1.26613	1.10331	1.10072	1.09488	1.07925
C09098	4.98426e+09	4.9031e+09	4.90305e+09	4.79715e+09	4.84451e+09	4.82173e+09	4.89214e+09	4.91141e+09	4.87955e+09	4.84589e+09	4.84959e+09	4.88161e+09	4.91301e+09	0.976418	0.986058	0.98142	0.995752	0.999675	0.993188	0.986337	0.987091	0.993609
C09100	265964	294533	301596	293728	278878	288219	290180	290381	289558	284880	280197	296756	286197	1.02632	0.974427	1.00707	1.01392	1.01462	1.01175	0.995398	0.979035	1.0369
C09419	286672	218623	214391	246288	264935	269212	261081	270255	248271	242101	227575	244634	238612	1.03217	1.11032	1.12824	1.09416	1.13261	1.04048	1.01462	0.953743	1.02524
C09633	825031	788521	806336	828894	917296	864039	820722	826051	819076	863362	849135	883391	822929	1.00725	1.11467	1.04996	0.997318	1.00379	0.995317	1.04913	1.03184	1.07347
C09674	1.96873e+06	789798	643334	1.0117e+06	1.24295e+06	1.40839e+06	2.34005e+06	6.19985e+06	567682	752254	546978	813672	1.05923e+06	0.955129	1.17344	1.32964	2.2092	5.85317	0.535938	0.710189	0.516392	0.768173
C09697	5.57056e+06	601912	553253	3.05061e+06	2.74912e+06	5.11079e+06	2.3475e+06	6.60643e+06	1.41206e+06	6.28829e+06	4.21846e+06	2.09391e+06	3.04853e+06	1.00068	0.901788	1.67648	0.770044	2.16709	0.463194	2.06273	1.38377	0.68686
C10149	2.44342e+06	2.67992e+06	2.64791e+06	2.79996e+06	2.75319e+06	2.73793e+06	2.35688e+06	2.36012e+06	2.17945e+06	2.38522e+06	2.48196e+06	2.57931e+06	2.50598e+06	1.11731	1.09865	1.09256	0.940503	0.941795	0.869699	0.951812	0.990416	1.02926
C10341	267246	295158	326518	329271	298778	280971	297161	290628	304897	303988	301865	321370	300165	1.09696	0.99538	0.936056	0.989993	0.968228	1.01576	1.01274	1.00566	1.07064
C10460	1.94659e+06	1.20817e+06	1.21629e+06	1.50068e+06	1.625e+06	1.75762e+06	1.6937e+06	1.7997e+06	1.62357e+06	1.69947e+06	1.75511e+06	1.68854e+06	1.53772e+06	0.975911	1.05676	1.14301	1.10144	1.17037	1.05583	1.10519	1.14137	1.09808
C10462	2.33318e+08	6.50766e+07	6.38718e+07	1.51066e+08	6.76504e+07	1.87741e+08	5.4665e+07	1.00857e+08	1.2397e+08	1.54815e+08	1.48887e+08	1.48976e+08	1.27213e+08	1.18751	0.531789	1.47581	0.429713	0.792825	0.974512	1.21697	1.17038	1.17108
C10550	2.30411e+06	2.34864e+06	2.30683e+06	2.38844e+06	2.32306e+06	2.32548e+06	2.36142e+06	2.27637e+06	2.3216e+06	2.35187e+06	2.41103e+06	2.32838e+06	2.3163e+06	1.03115	1.00292	1.00396	1.01948	0.982759	1.00229	1.01535	1.0409	1.00521
C10576	496242	402795	383439	483702	506476	517410	503486	504066	383113	424274	511139	472029	423757	1.14146	1.1952	1.22101	1.18815	1.18952	0.904088	1.00122	1.20621	1.11391
C10636	3.33577e+06	3.46393e+06	3.45792e+06	3.82068e+06	3.364e+06	3.39334e+06	3.07787e+06	3.08209e+06	3.46449e+06	3.3672e+06	3.28578e+06	3.31344e+06	3.38958e+06	1.12718	0.992452	1.00111	0.908036	0.909284	1.0221	0.993395	0.969374	0.977536
C10851	360397	231778	238401	270407	343878	687807	254201	292128	249628	238404	240989	257493	265741	1.01756	1.29404	2.58827	0.956575	1.0993	0.939366	0.897131	0.906859	0.968964
C10927	606198	506286	536959	557128	580307	534321	612192	481606	566949	574013	525865	561569	550347	1.01232	1.05444	0.97088	1.11237	0.875095	1.03017	1.043	0.955515	1.02039
C11721	2.58414e+06	2.45812e+06	2.41477e+06	3.28611e+06	2.4996e+06	2.55042e+06	3.22775e+06	2.71244e+06	3.09328e+06	3.38275e+06	3.24233e+06	3.91503e+06	2.70918e+06	1.21295	0.92264	0.941397	1.19141	1.0012	1.14178	1.24862	1.19679	1.4451
C12032	435206	429880	417543	1.74739e+06	450812	484512	1.76142e+06	1.99077e+06	1.22281e+06	1.83037e+06	1.86993e+06	2.10645e+06	733665	2.38173	0.614466	0.6604	2.40086	2.71346	1.66672	2.49483	2.54876	2.87113
C12391	85704.9	92347.7	95202.2	93987.2	86219.6	88760.8	84202	87446.5	87888	87019.8	89352.9	86043.4	89446.3	1.05077	0.963927	0.992336	0.941369	0.977643	0.982579	0.972873	0.998956	0.961956
C14291	309099	247172	255679	275467	377321	263822	255627	740049	257798	262331	278580	279538	264470	1.04158	1.42671	0.997551	0.966566	2.79824	0.974772	0.991915	1.05335	1.05698
C14322	6.09271e+08	8.87207e+08	8.59925e+08	6.43033e+08	6.59595e+08	4.35301e+08	6.20904e+08	6.33381e+08	6.55228e+08	1.00974e+09	6.52513e+08	6.54007e+08	7.13732e+08	0.900945	0.92415	0.609894	0.86994	0.887422	0.91803	1.41473	0.914227	0.91632
C14743	787597	706269	736575	837608	786649	776282	732867	755873	777913	707925	784063	743827	732361	1.14371	1.07413	1.05997	1.00069	1.03211	1.0622	0.966634	1.0706	1.01566
C14859	2.64516e+06	2.69449e+06	2.67802e+06	2.868e+06	3.15465e+06	2.84546e+06	2.85079e+06	2.72007e+06	3.51754e+06	3.34055e+06	3.33204e+06	3.35489e+06	2.7086e+06	1.05885	1.16468	1.05053	1.05249	1.00423	1.29866	1.23331	1.23017	1.23861
C15678	670057	696070	683793	694245	680010	637287	705226	762548	652637	706685	702453	689638	680502	1.02019	0.999277	0.936494	1.03633	1.12057	0.959052	1.03847	1.03226	1.01342
C15819	440404	287267	308195	405251	468687	446315	357079	332623	328810	363917	385564	420423	359603	1.12694	1.30335	1.24113	0.99298	0.924972	0.91437	1.012	1.07219	1.16913
C16624	265172	256408	264471	233751	252332	270715	246736	231493	240577	239124	251466	252206	248768	0.939632	1.01433	1.08822	0.991833	0.930559	0.967072	0.961233	1.01085	1.01382
C16625	256813	242612	255043	235924	261392	224925	244231	222814	227439	223291	244638	239777	238339	0.989868	1.09673	0.943718	1.02472	0.934862	0.95427	0.936863	1.02643	1.00603
C16891	251237	175922	166134	187371	225983	203690	204098	224423	197293	189696	196647	200692	196581	0.953148	1.14957	1.03616	1.03824	1.14163	1.00362	0.964973	1.00034	1.02091
C17005	1.72844e+09	1.03013e+08	7.5303e+07	8.34617e+07	1.62452e+09	1.32694e+09	1.91009e+08	2.85326e+08	1.85404e+08	1.76644e+08	1.93981e+08	2.01073e+08	5.34574e+08	0.156128	3.03891	2.48225	0.357311	0.533744	0.346826	0.330439	0.362871	0.376137
C17156	5.48771e+06	157832	156261	375381	2.5043e+06	1.50181e+06	1.80221e+06	695300	443839	1.39859e+06	1.20454e+06	2.62855e+06	1.91035e+06	0.196499	1.31091	0.786147	0.943394	0.363965	0.232334	0.732115	0.630537	1.37596
C17968	746720	697143	697254	717685	717078	703377	712535	783793	704053	694978	716819	698236	710946	1.00948	1.00862	0.989354	1.00224	1.10246	0.990305	0.97754	1.00826	0.982123
C17992	669056	604571	575449	4.0598e+06	647397	587955	1.23383e+07	2.22768e+06	1.02743e+07	1.11504e+07	3.58064e+06	2.50621e+06	2.47558e+06	1.63993	0.261513	0.237502	4.984	0.899859	4.15026	4.50417	1.44638	1.01237
C18466	409965	421461	404963	434930	413810	384090	408466	382873	424070	413899	418947	420993	418354	1.03962	0.989137	0.918097	0.976364	0.915189	1.01366	0.989349	1.00142	1.00631
C18470	851889	844968	858594	902794	893455	890950	894059	863695	867630	875851	849245	877381	850957	1.06092	1.04994	1.047	1.05065	1.01497	1.01959	1.02925	0.997988	1.03105
C18504	1.46503e+06	6.28589e+06	2.3405e+07	624108	965811	1.24035e+06	2.91779e+06	2.33008e+06	523516	720859	2.68523e+06	2.1879e+06	6.00085e+06	0.104003	0.160946	0.206695	0.486229	0.388291	0.0872403	0.120126	0.447475	0.364599
C19114	176461	310323	705419	177122	179907	171467	177933	174756	173270	567178	167299	155668	295136	0.600136	0.609573	0.580977	0.602884	0.592121	0.587087	1.92175	0.566854	0.527444
C19994	8.80591e+06	1.15514e+06	1.15123e+06	2.8205e+06	2.39095e+06	3.18246e+06	2.85016e+06	9.2514e+06	2.7099e+06	3.02038e+06	2.95025e+06	3.12903e+06	3.51875e+06	0.801564	0.679488	0.904429	0.809993	2.62917	0.770132	0.858368	0.838437	0.889245
C00003	4.03485e+06	3.28426e+06	3.10266e+06	1.98489e+08	3.97641e+06	4.16183e+06	1.75112e+08	2.15406e+08	1.60475e+08	2.01546e+08	2.03236e+08	2.2781e+08	5.26588e+07	3.76934	0.0755126	0.0790339	3.3254	4.09061	3.04744	3.82739	3.85948	4.32616
C00004	4.59495e+07	5.05983e+06	5.03585e+06	1.39713e+08	4.89989e+07	4.64164e+07	1.3455e+08	2.44924e+07	1.14616e+08	1.44415e+08	1.43255e+08	1.55372e+08	4.96826e+07	2.81211	0.986238	0.934258	2.70819	0.492977	2.30696	2.90676	2.8834	3.1273
C00005	1.85198e+06	1.60623e+06	1.55207e+06	1.71411e+06	1.91623e+06	1.73313e+06	1.60575e+06	1.75734e+06	1.58006e+06	1.69374e+06	1.67488e+06	1.69127e+06	1.6765e+06	1.02243	1.143	1.03378	0.957798	1.04822	0.942475	1.01028	0.999035	1.00881
C00008	629991	639339	648554	3.07174e+07	731022	722829	4.79637e+07	7.37762e+08	1.08279e+07	4.86822e+07	5.84833e+07	6.43395e+07	4.06411e+06	7.5582	0.179872	0.177856	11.8018	181.531	2.66427	11.9786	14.3902	15.8311
C00009	4.79861e+06	3.97741e+06	4.01111e+06	4.40256e+06	6.8172e+06	6.97781e+06	3.77425e+06	3.45804e+06	3.56298e+06	4.13613e+06	3.98731e+06	4.0993e+06	4.14395e+06	1.06241	1.6451	1.68386	0.910786	0.83448	0.859804	0.998115	0.962201	0.989227
C00019	697967	809605	759946	777438	759238	749831	756750	748454	748532	769873	753581	793737	752826	1.03269	1.00852	0.996021	1.00521	0.994193	0.994297	1.02264	1.001	1.05434
C00021	493845	469345	418934	500237	477749	465928	446038	396054	353792	380729	451106	460081	451933	1.10688	1.05712	1.03097	0.986955	0.876355	0.782842	0.842446	0.998169	1.01803
C00022	4.42701e+06	644515	700575	1.06826e+06	3.43662e+06	5.10604e+06	770732	752857	1.04924e+06	937019	1.02681e+06	1.00844e+06	1.92286e+06	0.555559	1.78724	2.65544	0.400826	0.39153	0.545668	0.487305	0.534004	0.52445
C00025	941350	879010	864473	931146	1.0051e+06	911083	851849	954278	845138	940169	914379	903120	885776	1.05122	1.13471	1.02857	0.961698	1.07733	0.954122	1.06141	1.03229	1.01958
C00026	3.38644e+07	3.47913e+07	2.62891e+07	3.79181e+07	3.1297e+07	4.2928e+07	3.70593e+07	6.36332e+07	2.83073e+07	5.11008e+07	3.4655e+07	4.83564e+07	3.10223e+07	1.22228	1.00885	1.38378	1.1946	2.0512	0.912481	1.64723	1.1171	1.55876
C00031	392901	260969	242745	403846	430634	415510	312075	296083	295003	356283	322796	340773	315243	1.28106	1.36604	1.31806	0.989951	0.939219	0.935795	1.13018	1.02396	1.08098
C00036	1.37187e+06	1.23618e+06	1.30977e+06	1.23778e+06	1.34085e+06	1.23956e+06	1.24565e+06	1.16768e+06	1.17669e+06	1.23581e+06	1.32057e+06	1.30072e+06	1.24246e+06	0.996234	1.07918	0.99766	1.00256	0.939808	0.947059	0.994646	1.06286	1.04689
C00037	4.53944e+06	2.44855e+06	2.51775e+06	3.25645e+06	5.16882e+06	5.16129e+06	2.61584e+06	3.21763e+06	2.63544e+06	3.05938e+06	2.99338e+06	3.10908e+06	3.11358e+06	1.04589	1.66009	1.65767	0.840139	1.03342	0.846433	0.982592	0.961394	0.998555
C00042	182509	193024	172845	187854	205647	194421	167350	176287	139125	169378	174043	188902	173550	1.08242	1.18494	1.12026	0.964278	1.01577	0.801646	0.975963	1.00284	1.08846
C00049	1.57239e+06	1.50275e+06	1.50851e+06	1.58959e+06	1.61239e+06	1.5998e+06	1.55717e+06	1.57545e+06	1.59093e+06	1.56179e+06	1.60976e+06	1.52897e+06	1.54602e+06	1.02818	1.04293	1.03479	1.00721	1.01904	1.02905	1.0102	1.04123	0.988974
C00059	429010	4.48594e+06	3.48956e+06	5.33121e+06	1.77069e+06	1.71628e+06	2.06437e+06	2.05185e+06	4.9107e+06	5.79496e+06	2.13928e+06	1.24921e+06	8.40782e+06	0.634078	0.2106	0.204129	0.24553	0.244041	0.584064	0.689234	0.254439	0.148577
C00061	463224	440503	458313	449667	469800	434361	434164	440004	431164	448070	423588	428430	440021	1.02192	1.06768	0.987138	0.98669	0.999962	0.979872	1.01829	0.962654	0.973659
C00062	533325	605693	585192	611487	586804	548894	513194	508705	497898	545051	556639	564036	552756	1.10625	1.0616	0.993013	0.928428	0.920307	0.900756	0.986061	1.00703	1.02041
C00064	455293	375587	376607	405754	616797	664752	492865	523894	402294	390857	466753	477086	393536	1.03105	1.56732	1.68918	1.2524	1.33125	1.02225	0.993192	1.18605	1.21231
C00065	413321	387017	350624	364737	399849	389955	373308	328804	334025	376535	377550	385061	372182	0.979996	1.07434	1.04775	1.00303	0.883449	0.897476	1.0117	1.01442	1.0346
C00074	3.51008e+06	2.17818e+06	2.25455e+06	6.39077e+06	2.67732e+06	2.47438e+06	1.73353e+07	4.60329e+06	1.25045e+06	3.48699e+06	1.60244e+07	1.84682e+07	2.25512e+06	2.83389	1.18722	1.09723	7.68708	2.04126	0.554494	1.54625	7.10576	8.18943
C00075	443728	492144	456996	480807	484004	440072	1.23059e+06	495544	1.20168e+06	615458	573188	651578	714012	0.673388	0.677865	0.616337	1.72349	0.694028	1.68299	0.861972	0.802771	0.912559
C00078	290802	282231	291147	289565	318028	283243	320912	286625	279433	314675	293253	292395	287147	1.00842	1.10754	0.986404	1.11759	0.998183	0.973134	1.09587	1.02126	1.01828
C00079	1.3861e+06	1.53384e+06	1.52532e+06	1.65175e+06	1.85733e+06	1.64634e+06	1.61821e+06	1.64574e+06	1.58988e+06	1.60291e+06	1.64018e+06	1.59069e+06	1.50018e+06	1.10103	1.23807	1.09743	1.07867	1.09703	1.05979	1.06847	1.09332	1.06033
C00080	614362	618614	620809	1.42117e+06	623408	658152	1.28292e+06	1.49418e+06	1.15041e+06	1.37561e+06	1.39403e+06	1.44514e+06	797082	1.78296	0.782112	0.825701	1.60952	1.87457	1.44328	1.72581	1.74892	1.81304
C00082	905264	1.00291e+06	1.02217e+06	1.06921e+06	924105	969746	1.04265e+06	1.12267e+06	1.02087e+06	1.01132e+06	1.04492e+06	1.03485e+06	997997	1.07135	0.92596	0.971692	1.04474	1.12492	1.02292	1.01335	1.04702	1.03693
C00086	564927	567952	560904	579102	586818	560729	534073	535132	570540	520902	553689	562853	560784	1.03267	1.04643	0.999902	0.952369	0.954258	1.0174	0.928881	0.987348	1.00369
C00093	1.69529e+06	1.43104e+06	1.50166e+06	1.62221e+06	1.62288e+06	1.56498e+06	1.71205e+06	1.571e+06	1.68259e+06	1.66043e+06	1.73698e+06	1.75559e+06	1.55062e+06	1.04617	1.04661	1.00927	1.10411	1.01315	1.08511	1.07082	1.12018	1.13219
C00099	2.41438e+07	3.25576e+06	3.28335e+06	3.60378e+06	1.77546e+07	1.53049e+07	3.78485e+06	9.82075e+06	3.86304e+06	7.42081e+06	6.9726e+06	3.35554e+06	8.50859e+06	0.423546	2.08667	1.79876	0.444827	1.15422	0.454016	0.872155	0.819478	0.394371
C00106	1.63545e+06	1.69719e+06	1.69534e+06	1.7927e+06	1.6493e+06	1.66368e+06	1.50901e+06	1.51108e+06	1.39571e+06	1.52715e+06	1.55962e+06	1.62451e+06	1.60891e+06	1.11423	1.0251	1.03404	0.937908	0.939197	0.867488	0.949186	0.969366	1.00969
C00108	489743	485782	491549	588854	491850	518432	564653	612273	533535	574363	565920	521900	497179	1.18439	0.98928	1.04275	1.13571	1.23149	1.07312	1.15524	1.13826	1.04972
C00110	1.99577e+06	276592	278462	656249	2.20364e+06	1.63847e+06	617441	611272	483833	457211	487685	664464	762029	0.861186	2.8918	2.15014	0.810259	0.802164	0.634928	0.599992	0.639981	0.871967
C00111	234541	236222	232412	235263	240275	241483	245818	242093	246124	234485	235280	231792	235135	1.00054	1.02186	1.027	1.04544	1.0296	1.04674	0.997237	1.00062	0.985785
C00114	2.89106e+07	2.84091e+06	4.68189e+06	1.22806e+07	5.27813e+07	1.0732e+08	1.22918e+07	2.20052e+07	9.01657e+07	3.04445e+07	6.73441e+07	6.02675e+07	1.32054e+07	0.929969	3.99696	8.12698	0.930818	1.66638	6.82797	2.30547	5.09976	4.56387
C00118	680803	794235	1.02517e+06	843061	749070	700677	638286	5.46114e+06	1.20623e+06	3.73317e+06	5.40328e+06	6.51502e+06	2.22019e+06	0.379725	0.33739	0.315593	0.287491	2.45976	0.543299	1.68146	2.4337	2.93444
C00122	5.4932e+06	2.20655e+06	2.03026e+06	8.80594e+06	4.25975e+06	1.42055e+07	9.76246e+06	1.86676e+07	6.98883e+06	9.79943e+06	8.28342e+06	1.38049e+07	4.78336e+06	1.84095	0.890535	2.96978	2.04092	3.90261	1.46107	2.04865	1.73172	2.88603
C00123	412634	299552	278392	326828	419528	401700	348342	382902	325987	292369	322492	340831	324320	1.00773	1.29356	1.23859	1.07407	1.18063	1.00514	0.901482	0.994364	1.05091
C00125	1.21462e+06	566077	583847	1.89613e+06	1.78292e+06	1.87692e+06	1.77459e+06	1.99266e+06	1.95823e+06	1.54054e+06	1.9559e+06	1.18815e+06	1.20065e+06	1.57926	1.48497	1.56325	1.47803	1.65966	1.63098	1.28309	1.62904	0.989596
C00144	236762	219743	222270	242495	246367	245779	226471	242688	226618	245762	232449	235753	224764	1.07888	1.09611	1.0935	1.00759	1.07974	1.00825	1.09342	1.03419	1.04889
C00147	531251	488848	482329	468806	513936	501219	479822	422620	429330	483970	424993	494929	481503	0.973629	1.06736	1.04095	0.996509	0.877709	0.891645	1.00512	0.882638	1.02788
C00148	2.80475e+06	2.91991e+06	2.35894e+06	7.61671e+06	4.82914e+06	9.55249e+06	4.79644e+06	3.33956e+06	4.58275e+06	3.08526e+06	3.5471e+06	5.21433e+06	2.83001e+06	2.69141	1.7064	3.37543	1.69485	1.18005	1.61934	1.09019	1.25339	1.84251
C00149	1.92366e+06	1.78649e+06	1.78808e+06	1.92283e+06	2.0772e+06	2.00601e+06	1.81166e+06	1.84942e+06	1.81442e+06	1.89595e+06	1.92604e+06	1.89404e+06	1.82375e+06	1.05433	1.13897	1.09994	0.993373	1.01408	0.994888	1.03959	1.05609	1.03854
C00153	437179	335706	316708	475838	446036	487373	439982	429607	387754	428514	447732	448309	496904	0.957606	0.897631	0.98082	0.885447	0.864568	0.78034	0.862369	0.901044	0.902205
C00158	1.33997e+06	1.27121e+06	1.31137e+06	1.43005e+06	1.39019e+06	1.38688e+06	1.44543e+06	1.45038e+06	1.29058e+06	1.41734e+06	1.36403e+06	1.3967e+06	1.29823e+06	1.10153	1.07083	1.06828	1.11338	1.11719	0.994102	1.09174	1.05068	1.07585
C00166	358454	363997	368310	428552	485814	439603	423268	430470	391449	393027	420920	426232	377377	1.13561	1.28735	1.16489	1.12161	1.14069	1.03729	1.04147	1.11538	1.12946
C00170	4.65721e+06	3.61311e+06	2.64851e+06	8.27448e+06	8.77678e+06	3.22514e+06	3.62678e+06	538772	4.90933e+06	2.66394e+06	2.22955e+06	2.24254e+06	3.84285e+06	2.15322	2.28393	0.839257	0.943774	0.140201	1.27752	0.69322	0.580182	0.583562
C00183	8.64024e+06	787066	8.88128e+06	764447	934750	892570	8.70526e+06	887624	8.91203e+06	9.35417e+06	9.06887e+06	9.24667e+06	6.84252e+06	0.11172	0.136609	0.130445	1.27223	0.129722	1.30245	1.36707	1.32537	1.35136
C00188	821986	833669	830419	874504	849708	865301	857868	852369	847505	805336	834795	804553	822823	1.06281	1.03267	1.05162	1.04259	1.03591	1.03	0.978747	1.01455	0.977796
C00197	2.50655e+09	3.64237e+06	2.93535e+06	9.49594e+08	1.06797e+09	1.77443e+09	9.385e+08	1.38984e+09	7.13e+08	1.04168e+09	1.13567e+09	1.20508e+09	8.91282e+08	1.06543	1.19824	1.99088	1.05298	1.55937	0.799972	1.16874	1.2742	1.35208
C00207	186632	168080	168871	184323	187209	168858	194757	179885	163995	170136	179262	177018	171434	1.07518	1.09202	0.984977	1.13605	1.0493	0.956606	0.99243	1.04567	1.03258
C00214	73714.2	83952.9	79024.1	87247.8	81921	81062.8	80562.5	75431.4	77801.8	85707.7	71770	74488	78584.8	1.11024	1.04245	1.03153	1.02517	0.959872	0.990036	1.09064	0.913281	0.947867
C00219	1.59585e+06	584162	603681	878527	1.66714e+06	1.12573e+06	762395	1.02792e+06	706146	785492	828282	887132	888059	0.989267	1.87728	1.26763	0.858496	1.15749	0.795157	0.884504	0.932689	0.998956
C00227	636204	697780	653139	632803	716859	677727	604901	589899	562220	590431	646238	648869	646441	0.978904	1.10893	1.0484	0.935741	0.912534	0.869717	0.913357	0.999687	1.00376
C00236	297316	259668	253604	271307	426432	292904	340750	361952	278132	270225	322697	329841	266458	1.0182	1.60037	1.09925	1.27881	1.35838	1.04381	1.01414	1.21106	1.23787
C00249	1.8683e+06	337909	344725	655498	529982	563113	521614	989218	591783	2.19064e+06	1.20819e+06	1.24388e+06	765212	0.856624	0.692595	0.735891	0.68166	1.29274	0.773358	2.86279	1.5789	1.62554
C00251	6.82129e+06	1.80074e+06	1.77216e+06	5.48682e+06	5.81612e+06	6.24982e+06	5.75822e+06	6.38637e+06	5.55769e+06	6.67503e+06	6.65917e+06	6.62188e+06	4.38441e+06	1.25144	1.32655	1.42547	1.31334	1.45661	1.2676	1.52245	1.51883	1.51033
C00253	1.50619e+06	1.63402e+06	1.59407e+06	1.70652e+06	1.69714e+06	1.60449e+06	1.45284e+06	1.45484e+06	1.34311e+06	1.47031e+06	1.52994e+06	1.56404e+06	1.51058e+06	1.12971	1.1235	1.06217	0.961777	0.963098	0.889136	0.973341	1.01282	1.03539
C00256	1.10921e+08	2.10825e+07	1.90355e+07	1.91972e+07	2.87361e+07	2.78461e+07	2.97537e+07	3.68313e+07	1.40619e+07	2.68323e+07	3.25448e+07	3.61887e+07	4.24538e+07	0.45219	0.676881	0.655915	0.70085	0.867563	0.331229	0.632037	0.766594	0.852425
C00257	2.26177e+06	2.07787e+06	2.14351e+06	2.33751e+06	2.34141e+06	2.34019e+06	2.36264e+06	2.37073e+06	2.23773e+06	2.31673e+06	2.25581e+06	2.283e+06	2.162e+06	1.08118	1.08298	1.08242	1.09281	1.09655	1.03503	1.07157	1.04339	1.05597
C00261	3.98886e+06	4.18162e+06	4.06782e+06	4.52343e+06	4.86287e+06	4.58372e+06	4.2368e+06	4.3089e+06	4.20835e+06	4.34677e+06	4.38772e+06	4.26648e+06	4.09769e+06	1.1039	1.18673	1.11861	1.03395	1.05154	1.027	1.06078	1.07078	1.04119
C00280	312730	7.04934e+06	5.8274e+06	568333	336823	291152	2.18455e+06	2.36558e+06	2.71366e+06	2.17772e+06	538098	567228	3.27844e+06	0.173354	0.102739	0.0888079	0.666338	0.721558	0.82773	0.664255	0.164132	0.173018
C00284	566830	573456	578316	471189	542777	610225	500350	498574	460196	464489	551637	574871	554201	0.850213	0.979385	1.10109	0.902831	0.899626	0.830376	0.838123	0.995372	1.0373
C00294	408981	386246	385804	546882	408323	418749	537170	429448	514790	562964	539597	651548	437211	1.25084	0.933926	0.957773	1.22863	0.982246	1.17744	1.28763	1.23418	1.49024
C00295	328365	339212	310869	452642	353452	1.51982e+06	275272	310209	282610	409274	366720	708918	499917	0.905434	0.707021	3.04014	0.550634	0.620521	0.565314	0.818684	0.733561	1.41807
C00296	46011.6	42654.8	43842	47349.4	46633.2	46224.5	45551.8	46219.5	48193.3	45683.6	44065.9	44863.8	44849.7	1.05573	1.03977	1.03065	1.01565	1.03054	1.07455	1.01859	0.982523	1.00031
C00299	551443	520951	547643	506590	561277	482972	524427	479108	488371	479463	525301	520981	511775	0.989868	1.09673	0.943718	1.02472	0.936169	0.95427	0.936863	1.02643	1.01799
C00311	1.40213e+06	1.26345e+06	1.33866e+06	1.26509e+06	1.37043e+06	1.2669e+06	1.27312e+06	1.19343e+06	1.20264e+06	1.26307e+06	1.3497e+06	1.32941e+06	1.26987e+06	0.996234	1.07918	0.99766	1.00256	0.939808	0.947059	0.994646	1.06286	1.04689
C00318	1.26627e+06	1.31492e+06	1.31264e+06	1.42562e+06	1.27698e+06	1.28812e+06	1.14424e+06	1.00977e+06	1.22244e+06	1.1865e+06	1.18027e+06	1.19887e+06	1.28278e+06	1.11136	0.995486	1.00417	0.892004	0.787176	0.952962	0.924945	0.920092	0.934593
C00331	429091	281155	272646	298736	416361	372314	326391	398234	292145	294738	337521	344553	317052	0.942231	1.31323	1.1743	1.02946	1.25605	0.921443	0.929619	1.06456	1.08674
C00337	567906	533139	533228	607885	590943	589533	580285	616526	543572	589493	579824	593710	542109	1.12133	1.09008	1.08748	1.07042	1.13727	1.0027	1.08741	1.06957	1.09519
C00341	2.1792e+06	2.07418e+06	2.09176e+06	2.2074e+06	2.10817e+06	2.20717e+06	1.96824e+06	1.74888e+06	1.76112e+06	1.98525e+06	1.9906e+06	2.0793e+06	2.04537e+06	1.07922	1.0307	1.07911	0.962288	0.855043	0.861025	0.970606	0.973222	1.01659
C00354	1.50281e+06	689182	650015	990102	1.67083e+06	1.7102e+06	866760	1.06616e+06	873254	1.01373e+06	989790	1.0302e+06	964671	1.02636	1.73202	1.77283	0.898504	1.10521	0.905235	1.05085	1.02604	1.06793
C00355	109046	111184	108368	110656	117293	118210	118127	108460	113982	108100	107648	110742	110027	1.00572	1.06604	1.07437	1.07361	0.985754	1.03594	0.982482	0.978379	1.0065
C00363	360107	343221	340221	349167	350200	342109	341151	318531	318979	367573	387509	358607	345302	1.01119	1.01419	0.990753	0.98798	0.922472	0.923769	1.0645	1.12223	1.03853
C00366	823862	802835	837447	799752	835559	772530	787809	782566	766843	773490	788986	764681	792739	1.00885	1.05402	0.974506	0.993781	0.987167	0.967334	0.975718	0.995265	0.964606
C00380	419874	476883	455242	498042	461976	432131	382960	365647	353792	429106	426437	456461	429521	1.15953	1.07556	1.00608	0.891598	0.851291	0.82369	0.999034	0.99282	1.06272
C00384	273977	181979	169271	281610	300289	289743	217616	206464	205711	248443	225092	237628	219825	1.28106	1.36604	1.31806	0.989951	0.939219	0.935795	1.13018	1.02396	1.08098
C00385	308293	307641	307365	329134	321736	317524	303214	315936	297928	312926	303593	300233	300524	1.0952	1.07058	1.05657	1.00895	1.05128	0.991361	1.04127	1.01021	0.999032
C00388	291047	466918	352937	235005	313282	282555	243987	274954	233311	262684	228122	392799	466122	0.504171	0.672103	0.606183	0.52344	0.589875	0.500537	0.563552	0.489404	0.842695
C00390	585085	621298	642552	693465	590905	614065	660909	670394	663021	650223	666559	644624	631054	1.0989	0.936379	0.973079	1.04731	1.06234	1.05066	1.03038	1.05626	1.0215
C00396	3.73972e+06	2.58703e+06	1.35327e+07	3.02857e+06	3.56831e+06	3.58059e+06	3.85454e+06	3.78253e+06	6.05667e+06	3.7872e+06	4.15786e+06	3.922e+06	5.99447e+06	0.505227	0.595267	0.597315	0.643017	0.631004	1.01038	0.631783	0.693616	0.65427
C00397	671418	588235	565949	618919	707958	690596	613448	745678	546179	626544	627663	624737	601207	1.02946	1.17756	1.14868	1.02036	1.2403	0.908471	1.04214	1.04401	1.03914
C00399	392792	396134	359260	432548	429924	421028	406675	1.0169e+06	415684	444637	597230	403769	398483	1.08549	1.0789	1.05658	1.02056	2.55193	1.04317	1.11582	1.49876	1.01326
C00407	619563	415381	433600	579094	748254	7.8508e+06	502340	487152	487782	589107	921737	605034	509201	1.13726	1.46947	15.4179	0.986527	0.956698	0.957936	1.15693	1.81016	1.1882
C00408	574843	555845	573323	506728	547009	586859	534879	501835	521526	518376	545132	546735	539283	0.939632	1.01433	1.08822	0.991833	0.930559	0.967072	0.961233	1.01085	1.01382
C00413	225135	232649	238108	249042	227805	229482	225925	230106	236956	226830	240414	238990	229659	1.0844	0.991927	0.999229	0.983744	1.00195	1.03178	0.987681	1.04683	1.04063
C00415	1.8772e+06	1.17633e+06	961770	1.52321e+06	1.92159e+06	1.85846e+06	1.56379e+06	1.67023e+06	1.53393e+06	1.75861e+06	1.80621e+06	1.70875e+06	1.40335e+06	1.08541	1.36929	1.3243	1.11432	1.19017	1.09305	1.25315	1.28707	1.21762
C00431	1.04573e+06	1.05795e+06	1.06692e+06	1.12591e+06	1.00136e+06	1.12579e+06	1.00392e+06	891415	849004	856924	1.01532e+06	1.06057e+06	1.02394e+06	1.09958	0.977941	1.09946	0.980441	0.870571	0.829152	0.836886	0.991581	1.03577
C00440	481677	393248	394317	424834	645802	436961	444481	579465	412018	413251	437269	431540	413991	1.02619	1.55994	1.05548	1.07365	1.39971	0.995235	0.998214	1.05623	1.04239
C00445	1.13297e+06	1.07802e+06	1.11208e+06	1.21273e+06	1.21475e+06	1.17611e+06	1.22577e+06	1.22996e+06	1.09445e+06	1.20195e+06	1.17034e+06	1.18445e+06	1.10773e+06	1.09479	1.09662	1.06174	1.10656	1.11035	0.988015	1.08506	1.05653	1.06926
C00448	262020	250253	261984	866323	265542	273037	2.14708e+06	5.96637e+06	482836	877704	996972	2.18423e+06	587464	1.47468	0.452014	0.464773	3.65482	10.1561	0.821898	1.49405	1.69708	3.71807
C00449	468106	495842	495956	496751	495399	491214	487607	492470	501868	497860	491505	500898	483563	1.02727	1.02447	1.01582	1.00836	1.01842	1.03785	1.02956	1.01642	1.03585
C00459	177376	201116	206149	188649	187882	197666	194323	190746	193112	190713	186129	190655	192928	0.977824	0.973844	1.02456	1.00723	0.988692	1.00095	0.988519	0.964759	0.988217
C00463	1.09829e+07	3.71603e+06	3.6127e+06	9.97075e+07	9.04145e+06	1.02823e+08	1.12959e+08	1.40228e+08	9.89753e+07	1.04213e+08	1.10565e+08	1.19909e+08	3.43972e+07	2.89871	0.262855	2.9893	3.28397	4.07672	2.87743	3.02969	3.21436	3.48602
C00472	562540	573891	558497	728991	608176	568941	552959	597958	636918	572101	606508	565758	566474	1.28689	1.07362	1.00435	0.976142	1.05558	1.12436	1.00993	1.07067	0.998735
C00475	106475	115255	114699	129744	122917	118372	111629	119292	123369	122168	116944	116860	113280	1.14535	1.08508	1.04495	0.985425	1.05307	1.08906	1.07846	1.03234	1.03161
C00483	2.67939e+06	2.78233e+06	2.79698e+06	3.06888e+06	2.70206e+06	2.72563e+06	2.91318e+06	2.40649e+06	2.78278e+06	2.80441e+06	2.63923e+06	2.66145e+06	2.72808e+06	1.12493	0.990465	0.999104	1.06785	0.882118	1.02005	1.02798	0.967433	0.975579
C00495	7.65785e+06	515712	486403	740889	2.04872e+07	1.72548e+07	1.44179e+06	685738	653452	758569	6.997e+06	8.30537e+06	2.35368e+06	0.31478	8.70435	7.331	0.61257	0.291348	0.277631	0.322291	2.9728	3.52868
C00499	2.25363e+06	2.38734e+06	2.38307e+06	2.68183e+06	2.49314e+06	2.60512e+06	2.48804e+06	2.42313e+06	2.42151e+06	2.50005e+06	2.71298e+06	3.35044e+06	2.39107e+06	1.1216	1.04268	1.08952	1.04055	1.01341	1.01273	1.04558	1.13463	1.40123
C00500	92420.9	91757.6	90678.9	89648.1	93534.1	90786.8	95013.8	89953.7	88474.7	89171.2	83913	93726.5	90221.8	0.993641	1.03671	1.00626	1.05311	0.997028	0.980635	0.988355	0.930074	1.03885
C00505	1.11739e+07	3.2183e+06	2.74203e+06	1.10123e+07	1.17117e+07	1.24734e+07	1.07929e+07	1.13763e+07	9.85788e+06	1.03394e+07	1.10403e+07	1.04982e+07	7.32676e+06	1.50303	1.59848	1.70245	1.47308	1.55271	1.34546	1.41118	1.50685	1.43286
C00525	538295	611337	590646	617185	592272	554009	517976	513445	502538	550130	561826	569291	557907	1.10625	1.0616	0.993013	0.928428	0.920307	0.900756	0.986061	1.00703	1.02041
C00526	86844.5	85185.7	84719.2	89538.5	91404.9	85476.1	90108.1	87639.8	86776.4	83408.1	83386.6	84327.1	84937.3	1.05417	1.07615	1.00634	1.06088	1.03182	1.02165	0.981996	0.981743	0.992816
C00530	496376	403811	389089	505455	533107	511407	504755	506652	411339	473386	494379	503765	434078	1.16443	1.22814	1.17814	1.16282	1.16719	0.947614	1.09055	1.13892	1.16054
C00535	1.85803e+07	1.3047e+07	5.96201e+06	973516	582542	4.61882e+06	942229	6.66358e+06	844810	5.847e+06	1.71581e+07	1.1807e+06	9.22322e+06	0.105551	0.0631604	0.500781	0.102158	0.722479	0.091596	0.633943	1.86031	0.128014
C00539	304823	253955	235755	230129	286049	292176	236675	227706	267604	260518	234740	234208	259924	0.885374	1.10051	1.12409	0.910558	0.876049	1.02955	1.00229	0.90311	0.901066
C00546	3.11834e+06	7.6961e+06	6.60295e+06	7.78058e+06	1.3408e+07	2.9582e+06	4.813e+06	4.26436e+06	7.97734e+06	1.021e+07	4.81445e+06	4.27407e+06	6.94677e+06	1.12003	1.93011	0.425838	0.69284	0.613862	1.14835	1.46975	0.693048	0.61526
C00550	1.12675e+07	3.56964e+06	3.31866e+06	8.72006e+06	1.04539e+07	9.5797e+06	8.78333e+06	1.03961e+07	9.29624e+06	8.82738e+06	9.06097e+06	9.04741e+06	7.3724e+06	1.1828	1.41797	1.2994	1.19138	1.41014	1.26095	1.19735	1.22904	1.2272
C00571	3.30641e+06	4.98028e+06	3.64762e+06	2.51683e+06	3.25172e+06	3.03105e+06	2.57098e+06	4.18103e+06	2.48731e+06	2.35099e+06	2.40878e+06	2.48534e+06	3.47677e+06	0.723901	0.935272	0.8718	0.739475	1.20256	0.71541	0.676201	0.692823	0.714843
C00584	290054	138959	291002	163889	189289	193475	224546	174410	149986	178376	201606	166949	203506	0.805331	0.930142	0.950713	1.10339	0.857027	0.737013	0.876517	0.990665	0.820364
C00588	6.4668e+06	2.00422e+06	1.90123e+06	3.74064e+07	1.70568e+07	5.88259e+06	4.94606e+06	5.46776e+06	4.78294e+06	5.00765e+06	5.07277e+06	5.27444e+06	3.98786e+06	9.38005	4.27717	1.47512	1.24028	1.3711	1.19937	1.25572	1.27205	1.32262
C00596	636071	570390	594865	676460	635305	626933	660918	610450	590083	577366	633216	600722	594572	1.13773	1.06851	1.05443	1.11159	1.02671	0.992451	0.971062	1.065	1.01034
C00601	1.41409e+08	1.08674e+08	9.69928e+07	3.53082e+08	3.51945e+08	1.11207e+08	3.71909e+08	4.6511e+08	3.21296e+08	3.55294e+08	3.73974e+08	3.84088e+08	1.83033e+08	1.92906	1.92285	0.607577	2.03193	2.54113	1.7554	1.94115	2.04321	2.09846
C00624	9.14682e+06	3.24763e+07	1.08232e+06	2.60578e+06	6.10899e+06	4.17941e+06	1.95913e+06	1.4647e+07	1.3199e+07	2.34514e+07	1.67536e+07	3.12179e+06	1.13856e+07	0.228866	0.536554	0.367078	0.172071	1.28645	1.15927	2.05974	1.47147	0.274188
C00631	203460	165279	165701	183574	198859	183837	174926	168610	170611	183282	169497	181040	174957	1.04925	1.13662	1.05076	0.999822	0.963725	0.975161	1.04758	0.968791	1.03477
C00633	422579	278234	259374	430563	507664	448969	332721	611770	333765	404506	349264	400905	341852	1.2595	1.48504	1.31334	0.973288	1.78957	0.976342	1.18328	1.02168	1.17274
C00644	257546	249955	257852	264237	281658	250852	284212	254308	247477	271853	262658	262148	253658	1.0417	1.11038	0.988935	1.12045	1.00256	0.97563	1.07173	1.03548	1.03347
C00655	430919	359062	384653	394115	453688	452014	390412	355288	360929	377574	369954	393365	384419	1.02522	1.18019	1.17584	1.01559	0.92422	0.938894	0.982194	0.962372	1.02327
C00666	450034	440940	449972	4.22661e+06	456083	463767	8.63887e+06	2.19399e+06	4.47127e+06	1.36386e+07	5.82549e+06	1.12256e+07	3.83326e+06	1.10262	0.11898	0.120985	2.25366	0.572356	1.16644	3.55797	1.51972	2.92848
C00668	1.54916e+06	1.45836e+06	1.45718e+06	1.58798e+06	1.53409e+06	1.57435e+06	1.45912e+06	1.49768e+06	1.48469e+06	1.52918e+06	1.51964e+06	1.4898e+06	1.48224e+06	1.07134	1.03498	1.06215	0.984406	1.01042	1.00166	1.03167	1.02523	1.00511
C00670	569269	575924	580804	544006	545113	612851	502503	500720	483327	458494	554010	577345	558549	0.973964	0.975945	1.09722	0.899659	0.896466	0.865327	0.820867	0.991875	1.03365
C00695	5.09228e+06	1.36673e+06	1.34162e+06	5.77659e+07	4.11023e+06	1.69079e+06	5.89957e+07	4.49268e+08	2.19462e+07	4.2722e+06	6.86097e+07	9.30958e+07	7.30416e+06	7.90863	0.562724	0.231483	8.077	61.5085	3.00461	0.584899	9.39323	12.7456
C00700	430869	380577	407282	432817	471865	434286	407394	422005	415386	414976	417996	440950	404126	1.07099	1.16762	1.07463	1.00809	1.04424	1.02786	1.02685	1.03432	1.09112
C00703	362601	394155	379125	410798	399272	408123	400865	399581	390469	507910	375394	398693	378281	1.08596	1.05549	1.07889	1.0597	1.05631	1.03222	1.34268	0.992369	1.05396
C00712	768804	474126	477314	588916	680429	689749	675630	761126	637144	670924	704158	662640	604677	0.973934	1.12528	1.14069	1.11734	1.25873	1.05369	1.10956	1.16452	1.09586
C00740	1.25158e+06	1.39208e+06	1.33635e+06	1.53545e+06	1.28425e+06	1.24142e+06	1.2333e+06	1.1811e+06	1.3923e+06	1.33807e+06	1.32048e+06	1.26055e+06	1.32779e+06	1.15639	0.967208	0.934954	0.928836	0.889528	1.04859	1.00774	0.994496	0.949363
C00747	559332	371514	373316	574913	613048	591517	444268	421501	419965	507203	467001	520915	455786	1.26137	1.34503	1.29779	0.97473	0.924779	0.921407	1.11281	1.02461	1.14289
C00753	7.70605e+07	2.40062e+07	2.2832e+07	2.62375e+07	7.97063e+07	8.05962e+07	7.61368e+07	7.58242e+07	3.8617e+07	2.75895e+07	7.83765e+07	7.7553e+07	4.26727e+07	0.614855	1.86785	1.88871	1.7842	1.77688	0.904957	0.646536	1.83669	1.81739
C00757	2.80835e+07	2.90724e+07	2.91645e+07	2.60175e+07	2.54287e+07	2.52299e+07	2.87761e+07	2.77616e+07	2.86727e+07	2.72555e+07	2.80169e+07	2.81566e+07	2.83199e+07	0.918699	0.897907	0.890889	1.01611	0.980285	1.01246	0.962413	0.989298	0.994233
C00768	847760	561975	539032	677968	837995	834698	659453	757481	645596	614165	599889	663132	641229	1.0573	1.30686	1.30172	1.02842	1.1813	1.00681	0.957794	0.935531	1.03416
C00786	2.70943e+06	2.86607e+06	2.92297e+06	2.90152e+06	2.76501e+06	2.82341e+06	2.81732e+06	2.85468e+06	2.90148e+06	2.87676e+06	2.76411e+06	2.80619e+06	2.80488e+06	1.03446	0.985785	1.00661	1.00443	1.01776	1.03444	1.02563	0.985465	1.00047
C00788	220600	181117	172488	203358	232256	231399	191800	181800	172531	193291	199096	203931	189440	1.07347	1.22601	1.22149	1.01246	0.959674	0.910742	1.02033	1.05097	1.07649
C00791	683142	400316	357582	711324	970515	993379	503463	511582	507235	544274	567644	541809	547865	1.29836	1.77145	1.81318	0.918956	0.933774	0.92584	0.993446	1.0361	0.988947
C00802	1.72433e+06	1.60138e+06	1.6028e+06	1.72358e+06	1.86196e+06	1.79815e+06	1.62394e+06	1.63412e+06	1.62641e+06	1.69949e+06	1.61718e+06	1.69778e+06	1.63477e+06	1.05433	1.13897	1.09994	0.993373	0.9996	0.994888	1.03959	0.989241	1.03854
C00805	587846	402149	399464	606376	599323	662775	592747	589617	577215	542231	593744	573849	500195	1.21228	1.19818	1.32503	1.18503	1.17878	1.15398	1.08404	1.18703	1.14725
C00810	9.11572e+07	6.27829e+06	6.60655e+07	7.38667e+07	9.1201e+07	8.94105e+07	7.19815e+07	8.14354e+07	7.04317e+07	6.58287e+07	6.97539e+07	7.37318e+07	4.9422e+07	1.49461	1.84535	1.80912	1.45647	1.64776	1.42511	1.33197	1.41139	1.49188
C00813	1.88608e+06	1.19951e+06	1.16737e+06	1.70729e+06	1.89962e+06	1.77059e+06	1.55645e+06	1.74502e+06	1.46289e+06	1.61029e+06	1.65782e+06	1.6806e+06	1.45452e+06	1.17378	1.30601	1.2173	1.07008	1.19972	1.00576	1.10709	1.13977	1.15543
C00826	38719.3	39038.3	37971.7	39291	41647.6	41973.3	39835	38511.1	39868.8	38383.3	37732.5	39321.5	39399.2	0.997253	1.05707	1.06533	1.01106	0.977459	1.01192	0.974216	0.957696	0.998029
C00828	844354	561441	572401	594296	697731	673822	578955	643570	562052	591783	569857	605842	633745	0.937753	1.10097	1.06324	0.913545	1.0155	0.886874	0.933788	0.899189	0.955971
C00829	227406	283222	273960	302039	254577	247280	291635	270833	287923	298965	275653	267124	264219	1.14314	0.963509	0.93589	1.10376	1.02503	1.08971	1.1315	1.04327	1.01099
C00830	1.87372e+07	6.0189e+06	5.68976e+06	2.02832e+06	1.94357e+07	2.64341e+06	2.36108e+06	2.39395e+06	9.86866e+06	4.50344e+06	2.8994e+06	1.96038e+07	1.0496e+07	0.193247	1.85173	0.251849	0.224951	0.228082	0.94023	0.429063	0.276239	1.86774
C00837	662265	698816	1.02423e+06	1.08081e+08	1.49688e+09	1.16116e+09	1.54685e+07	2.52063e+07	1.0469e+07	1.43916e+07	2.45843e+07	2.64779e+07	2.20011e+07	4.91251	68.0364	52.7773	0.703077	1.14568	0.475838	0.654129	1.11741	1.20348
C00844	269050	255274	266198	261176	272870	252286	246861	246922	250429	252600	246029	246297	253278	1.03118	1.07735	0.996083	0.974665	0.974902	0.988751	0.997322	0.971377	0.972437
C00855	3.42322e+06	780424	784209	1.2077e+06	1.94443e+06	3.50654e+06	933256	1.86877e+06	952587	1.13461e+06	1.02681e+06	1.12451e+06	1.60408e+06	0.752889	1.21217	2.18601	0.581801	1.16501	0.593851	0.707326	0.640126	0.701028
C00896	922977	877706	913192	939026	936081	905902	878166	901369	859098	892784	914587	891936	877480	1.07014	1.06678	1.03239	1.00078	1.02722	0.979052	1.01744	1.04229	1.01647
C00898	106383	105472	105555	106849	107004	109674	107796	109608	111783	106496	103595	105273	105489	1.01289	1.01436	1.03967	1.02187	1.03904	1.05966	1.00954	0.982042	0.997951
C00902	846400	988643	1.03412e+06	1.04284e+06	946267	905089	978515	958910	1.03281e+06	985390	1.0406e+06	1.01816e+06	971767	1.07314	0.973759	0.931385	1.00694	0.986769	1.06281	1.01402	1.07083	1.04774
C00903	1.92505e+07	610307	568939	1.03899e+06	1.55728e+08	1.74449e+08	2.03455e+07	4.25171e+07	1.9293e+06	5.78804e+06	2.72976e+07	3.38203e+07	6.75094e+06	0.153903	23.0676	25.8407	3.01372	6.29796	0.285782	0.857367	4.04352	5.00972
C00906	366149	298393	287514	361478	380413	341846	372984	374386	303955	345872	378654	361141	316742	1.14124	1.20102	1.07926	1.17757	1.18199	0.959632	1.09197	1.19547	1.14017
C00921	286877	323628	327271	321482	307415	313473	322738	314952	326712	319104	306714	318880	313218	1.02638	0.981473	1.00082	1.0304	1.00554	1.04308	1.01879	0.979236	1.01808
C00922	4.22758e+07	4.47409e+07	3.99799e+07	2.74089e+07	2.68115e+07	8.90886e+07	4.0655e+07	4.00679e+07	3.62691e+07	3.69936e+07	4.06091e+07	3.79579e+07	5.40907e+07	0.506721	0.495677	1.64702	0.751607	0.740753	0.670523	0.683918	0.75076	0.701745
C00928	2.05618e+06	2.15156e+06	2.17561e+06	2.3871e+06	2.20752e+06	2.13986e+06	2.26599e+06	2.04088e+06	2.16456e+06	2.18138e+06	2.23476e+06	2.16049e+06	2.13723e+06	1.11691	1.03289	1.00123	1.06025	0.954922	1.01279	1.02066	1.04564	1.01088
C00931	310534	321388	333272	338649	317516	315393	640998	2.57493e+06	361245	344501	336065	363443	326728	1.03649	0.971807	0.965307	1.96187	7.88095	1.10564	1.0544	1.02858	1.11237
C00939	963106	1.00833e+06	1.04799e+06	997410	1.04023e+06	880088	1.00508e+06	1.17367e+06	930634	1.06936e+06	1.08323e+06	953523	1.00008e+06	0.997326	1.04014	0.880014	1.00499	1.17357	0.930555	1.06927	1.08314	0.953442
C00954	7.58458e+07	1.0579e+08	9.99764e+07	9.2214e+07	7.43044e+07	7.46699e+07	9.36618e+07	9.9527e+07	9.98903e+07	1.01867e+08	1.04745e+08	9.6422e+07	9.65643e+07	0.954949	0.769481	0.773266	0.969942	1.03068	1.03444	1.05491	1.08471	0.998526
C00986	1.16192e+06	482687	460969	772771	1.32302e+06	1.28078e+06	648249	823590	657009	743924	766190	795806	718718	1.07521	1.84081	1.78203	0.901952	1.14592	0.91414	1.03507	1.06605	1.10726
C00988	3.74409e+06	2.98672e+06	2.8677e+06	3.39607e+06	3.70572e+06	3.51853e+06	3.41499e+06	3.4157e+06	3.27132e+06	3.82754e+06	4.21145e+06	3.59167e+06	3.16142e+06	1.07422	1.17217	1.11296	1.08021	1.08043	1.03476	1.2107	1.33214	1.13609
C00990	312230	279989	282724	332056	311854	307744	274071	299654	270546	280645	292798	294878	288786	1.14983	1.07988	1.06565	0.949045	1.03763	0.936838	0.97181	1.01389	1.0211
C01004	671744	551517	567103	619243	707237	704629	584047	558730	525370	588587	628376	662398	583836	1.06064	1.21136	1.20689	1.00036	0.956997	0.899857	1.00814	1.07629	1.13456
C01010	2.56243e+06	1.83879e+06	1.92039e+06	1.81484e+06	2.48641e+06	2.22337e+06	1.94913e+06	2.45137e+06	1.74462e+06	1.81195e+06	2.01559e+06	2.18084e+06	1.9867e+06	0.913497	1.25153	1.11913	0.98109	1.23389	0.878152	0.912041	1.01454	1.09772
C01017	912528	749206	770379	841209	960744	957201	793397	752032	713687	799564	853616	882557	793111	1.06064	1.21136	1.20689	1.00036	0.948205	0.899857	1.00814	1.07629	1.11278
C01023	1.38876e+06	1.36714e+06	1.29155e+06	3.18604e+06	1.33924e+06	1.42564e+06	2.70256e+06	3.16886e+06	2.34775e+06	2.7853e+06	2.74048e+06	3.37167e+06	1.73899e+06	1.83212	0.770122	0.819806	1.55409	1.82224	1.35006	1.60167	1.5759	1.93886
C01035	453860	525680	528975	536192	473507	459242	519031	537004	515230	493488	527916	531485	504409	1.06301	0.938736	0.910456	1.02899	1.06462	1.02145	0.978349	1.0466	1.05368
C01041	595802	631103	631250	632261	630540	625213	637404	626812	639063	633672	625584	637539	616389	1.02575	1.02296	1.01432	1.03409	1.01691	1.03678	1.02804	1.01492	1.03431
C01053	534735	311621	312324	405701	504293	472987	398300	460543	384276	396270	374008	383028	384583	1.05491	1.31127	1.22987	1.03567	1.19751	0.999202	1.03039	0.972504	0.995956
C01059	293957	194862	186907	235128	297382	289428	228662	255252	223858	202848	194954	220238	221711	1.06051	1.3413	1.30543	1.03135	1.15128	1.00968	0.914917	0.879313	0.993353
C01061	120709	205137	106605	106526	254222	106490	115187	105974	125917	238218	417949	114694	134368	0.792793	1.89197	0.792519	0.857246	0.78868	0.937099	1.77287	3.11047	0.853575
C01068	1.92979e+06	1.81668e+06	1.89013e+06	1.97815e+06	1.91102e+06	1.96117e+06	1.81763e+06	1.86565e+06	1.87531e+06	1.9049e+06	1.89301e+06	1.85585e+06	1.86954e+06	1.05809	1.02218	1.04901	0.972232	0.99792	1.00308	1.01891	1.01255	0.992675
C01079	1.34671e+09	1.18902e+06	1.1836e+06	1.7477e+08	1.23141e+09	9.8282e+08	1.93351e+08	2.8881e+07	1.13317e+08	1.17296e+07	2.26476e+08	2.76901e+08	3.60953e+08	0.484191	3.41154	2.72285	0.535669	0.0800132	0.313938	0.0324963	0.627439	0.767139
C01081	1.0973e+06	1.18912e+06	1.15178e+06	2.91869e+06	1.11386e+06	1.07297e+06	2.73683e+06	2.87459e+06	2.43257e+06	2.6198e+06	2.74091e+06	2.76301e+06	1.54748e+06	1.8861	0.719791	0.693371	1.76858	1.8576	1.57196	1.69295	1.77121	1.7855
C01091	819157	904310	910461	741727	832686	803536	1.00617e+06	1.55536e+06	977134	938312	802527	723013	970085	0.764599	0.858363	0.828315	1.03719	1.60332	1.00727	0.967247	0.827274	0.745308
C01103	3.10171e+06	1.79939e+06	1.88417e+06	2.6579e+06	1.64357e+06	2.34159e+06	865152	4.06261e+06	1.21743e+06	2.57189e+06	4.76852e+06	2.61141e+06	3.31119e+06	0.802702	0.496369	0.707174	0.261281	1.22693	0.367673	0.776726	1.44012	0.788661
C01104	631372	655630	623211	670268	636716	642270	543271	464727	609518	562786	570887	550764	625990	1.07073	1.01714	1.02601	0.867858	0.742387	0.973687	0.899034	0.911974	0.879829
C01118	2.01756e+06	2.19479e+06	2.20855e+06	2.29786e+06	2.06472e+06	8.21672e+06	2.18136e+06	2.27746e+06	2.29082e+06	2.27303e+06	2.24685e+06	2.21903e+06	2.17819e+06	1.05494	0.947909	3.77227	1.00146	1.04558	1.05171	1.04354	1.03152	1.01875
C01133	1.09243e+06	1.2391e+06	1.21891e+06	1.3151e+06	2.62645e+06	3.46055e+06	1.21182e+06	1.33875e+06	1.20594e+06	1.30089e+06	1.23109e+06	1.23403e+06	1.20678e+06	1.08976	2.17642	2.8676	1.00418	1.10936	0.999309	1.07799	1.02015	1.02258
C01134	637974	684614	670984	714158	652887	637426	669545	718413	724380	685635	678869	674477	681852	1.04738	0.95752	0.934845	0.981951	1.05362	1.06237	1.00555	0.995626	0.989185
C01136	4.40714e+06	941372	2.8445e+06	6.72324e+07	1.05834e+07	1.00586e+07	2.21678e+06	957024	1.87901e+06	2.12329e+06	3.14707e+06	1.01297e+06	2.12148e+06	31.6913	4.98869	4.74131	1.04492	0.451112	0.885707	1.00086	1.48344	0.477485
C01137	757014	358987	355090	534557	614226	658385	568248	638298	501521	560171	557063	581449	494664	1.08065	1.2417	1.33097	1.14875	1.29037	1.01386	1.13243	1.12614	1.17544
C01142	634576	625248	604327	645525	653644	657283	620852	591675	618217	593159	605552	628338	610849	1.05677	1.07006	1.07602	1.01638	0.968611	1.01206	0.97104	0.991328	1.02863
C01143	144102	247673	354399	202004	154460	156563	151747	147528	143611	305449	144360	147528	203928	0.990564	0.757425	0.767736	0.744118	0.723429	0.704222	1.49783	0.707898	0.723432
C01169	2.04541e+06	204368	204923	220783	3.80684e+06	222559	819935	1.59454e+06	206621	210255	708736	376897	662952	0.33303	5.74226	0.335709	1.23679	2.40521	0.311669	0.31715	1.06906	0.568513
C01179	392901	260969	242745	403846	430634	415510	312075	296083	295003	356283	322796	340773	315243	1.28106	1.36604	1.31806	0.989951	0.939219	0.935795	1.13018	1.02396	1.08098
C01185	2.92877e+06	2.90352e+06	2.81126e+06	2.96668e+06	2.98291e+06	2.96637e+06	2.64525e+06	2.55704e+06	2.36689e+06	2.66811e+06	2.68905e+06	2.79452e+06	2.77936e+06	1.0674	1.07324	1.06729	0.951748	0.920012	0.851595	0.959976	0.967508	1.00545
C01194	282315	306948	314131	310342	290824	310433	307031	309703	317898	297106	309988	294942	299475	1.03628	0.971112	1.03659	1.02523	1.03415	1.06152	0.992089	1.03511	0.984864
C01205	1.11235e+09	1.28948e+07	6.32284e+06	3.95514e+08	1.13203e+09	1.11218e+09	6.40358e+08	5.76209e+08	2.44496e+08	3.79913e+08	7.64994e+08	7.42912e+08	3.72714e+08	1.06117	3.03727	2.98401	1.71809	1.54598	0.655989	1.01931	2.05249	1.99325
C01207	420411	276806	247333	428354	485432	440725	331014	323337	320126	345497	344339	361453	333600	1.28403	1.45513	1.32112	0.992248	0.969236	0.959612	1.03566	1.03219	1.08349
C01210	249708	201376	575666	1.89565e+06	249418	245880	234525	254877	2.36945e+06	573842	237075	253424	593225	3.1955	0.420444	0.414481	0.395339	0.429646	3.99418	0.967326	0.399638	0.427198
C01214	603472	468114	471856	556307	635358	633014	476005	497332	471974	528766	564512	530803	511393	1.08783	1.2424	1.23782	0.9308	0.972505	0.922918	1.03397	1.10387	1.03796
C01215	6.16845e+07	3.05446e+06	2.91249e+06	6.48356e+06	7.19289e+06	7.74845e+06	2.99132e+06	5.21012e+06	2.98684e+06	3.07486e+06	3.27738e+06	3.18379e+06	1.77053e+07	0.366193	0.406256	0.437634	0.16895	0.294269	0.168697	0.173669	0.185107	0.179821
C01227	798959	793045	809107	2.92762e+06	829137	771445	2.07324e+06	1.15562e+07	2.0012e+06	3.24802e+06	4.09029e+06	2.59697e+06	1.20354e+06	2.4325	0.688915	0.640979	1.72261	9.60184	1.66276	2.69872	3.39854	2.15777
C01234	3.88993e+06	3.56468e+06	3.58345e+06	3.93181e+06	4.40284e+06	3.49204e+06	3.73233e+06	3.76968e+06	3.56526e+06	3.59297e+06	3.39666e+06	3.48637e+06	3.6203e+06	1.08604	1.21615	0.964571	1.03094	1.04126	0.984796	0.992451	0.938226	0.963006
C01235	198835	212833	208641	212754	206892	215567	212352	216188	223633	215967	212654	212581	207825	1.02372	0.995508	1.03725	1.02178	1.04024	1.07606	1.03917	1.02324	1.02288
C01239	404525	315407	333639	337929	408711	386247	339135	357159	315930	349954	333806	360152	347701	0.971896	1.17547	1.11086	0.975364	1.0272	0.908625	1.00648	0.960037	1.03581
C01252	412903	362658	386155	371405	347544	350013	384210	388489	383051	354727	411050	378238	380600	0.975841	0.913148	0.919636	1.00949	1.02073	1.00644	0.932022	1.08001	0.993793
C01263	1.38917e+06	1.05099e+06	1.08261e+06	1.28194e+06	1.45046e+06	1.38803e+06	1.23025e+06	1.30841e+06	1.20715e+06	1.20752e+06	1.30681e+06	1.3153e+06	1.19607e+06	1.07179	1.21269	1.16049	1.02858	1.09392	1.00926	1.00957	1.09258	1.09968
C01266	778097	872944	873617	886789	839417	871350	891820	889867	865756	877214	878015	861452	843654	1.05113	0.994978	1.03283	1.05709	1.05478	1.0262	1.03978	1.04073	1.0211
C01267	6.79147e+06	6.6515e+06	6.73342e+06	6.52091e+06	6.78954e+06	6.86071e+06	6.61915e+06	6.63226e+06	6.65739e+06	6.69593e+06	7.13694e+06	6.88713e+06	6.73718e+06	0.967898	1.00777	1.01833	0.982481	0.984426	0.988156	0.993877	1.05934	1.02226
C01279	498210	503872	500909	1.17787e+06	501132	507614	1.10269e+06	1.28387e+06	996221	1.03328e+06	1.04833e+06	1.16637e+06	659006	1.78734	0.760437	0.770272	1.67327	1.94819	1.5117	1.56794	1.59077	1.7699
C01294	291844	336204	340004	376184	311506	315621	374614	353011	373296	363076	346978	386099	336151	1.11909	0.926683	0.938925	1.11442	1.05016	1.1105	1.0801	1.03221	1.14859
C01298	327081	218708	220487	251563	309739	309003	260490	288941	228388	222236	224871	245613	247727	1.01548	1.25032	1.24735	1.05152	1.16637	0.921933	0.897101	0.907737	0.991463
C01300	945784	952510	952979	985710	1.00044e+06	1.00706e+06	995014	1.00907e+06	951576	993828	987657	961282	957552	1.02941	1.04479	1.05171	1.03912	1.0538	0.993759	1.03788	1.03144	1.0039
C01397	251689	154976	153394	184566	261562	245291	204492	235609	196878	197956	190171	205246	186424	0.990036	1.40305	1.31577	1.09692	1.26383	1.05608	1.06186	1.0201	1.10096
C01403	1.62086e+06	5.36313e+06	3.00616e+06	4.71114e+07	1.55163e+06	3.1984e+06	1.63689e+06	5.01286e+07	4.01496e+07	1.58753e+06	4.54711e+07	1.67851e+06	8.71521e+06	5.40565	0.178037	0.366991	0.18782	5.75186	4.60684	0.182157	5.21744	0.192595
C01407	514810	687005	588237	618999	537610	530696	598267	579293	682482	496604	2.00917e+06	805739	669126	0.925086	0.803451	0.793118	0.894101	0.865745	1.01996	0.742168	3.00268	1.20417
C01412	646873	490959	443364	673015	696008	735611	627926	654414	606766	592301	658994	656521	559683	1.20249	1.24357	1.31434	1.12193	1.16926	1.08412	1.05828	1.17744	1.17302
C01416	204759	228632	228409	249508	236378	227638	214670	222071	237247	234938	224891	224730	221755	1.12515	1.06594	1.02653	0.968049	1.00142	1.06986	1.05945	1.01414	1.01342
C01444	2.34044e+06	1.65546e+06	1.75402e+06	1.65761e+06	2.271e+06	2.03075e+06	1.78027e+06	2.239e+06	1.59348e+06	1.65497e+06	1.84097e+06	1.9919e+06	1.80857e+06	0.916531	1.25569	1.12284	0.984349	1.23799	0.881069	0.915071	1.01791	1.10137
C01451	280058	267070	255186	288365	311269	302934	275529	267389	268116	276303	274678	288457	267025	1.07992	1.16569	1.13448	1.03185	1.00136	1.00409	1.03475	1.02866	1.08026
C01453	1.97864e+06	1.97991e+06	2.02383e+06	2.17781e+06	2.2284e+06	1.96433e+06	2.17264e+06	2.27169e+06	2.1174e+06	2.19846e+06	2.10208e+06	2.16946e+06	2.04529e+06	1.0648	1.08953	0.960418	1.06226	1.1107	1.03526	1.07489	1.02777	1.06071
C01455	807426	406440	401427	6.17478e+06	371664	657932	1.28682e+06	6.25097e+06	1.70713e+06	7.09892e+06	9.8865e+06	7.55308e+06	1.08225e+06	5.70549	0.343417	0.607928	1.18902	5.77589	1.57738	6.55939	9.13511	6.97903
C01468	502665	403541	369280	538675	564160	527041	495208	510591	464819	466864	526805	532153	435785	1.2361	1.29458	1.2094	1.13636	1.17166	1.06662	1.07132	1.20886	1.22114
C01474	607170	671703	628423	643232	748930	737911	647377	689438	655058	656026	679605	664589	643025	1.00032	1.1647	1.14756	1.00677	1.07218	1.01871	1.02022	1.05689	1.03354
C01512	633596	720956	732953	721283	640320	617597	659235	693346	716033	699014	660567	654321	680657	1.05969	0.940739	0.907354	0.968528	1.01864	1.05197	1.02697	0.970485	0.961309
C01523	531318	524492	536893	1.24888e+06	539140	524357	1.18482e+06	1.37949e+06	1.07041e+06	1.18966e+06	1.2056e+06	1.2498e+06	698078	1.78903	0.772321	0.751143	1.69725	1.97612	1.53337	1.7042	1.72702	1.79034
C01526	522045	432169	368428	448887	483240	475800	427363	455285	428234	410521	428305	419722	442262	1.01498	1.09266	1.07583	0.966311	1.02945	0.968281	0.928231	0.968443	0.949034
C01530	1.34027e+06	1.1045e+06	1.19082e+06	1.13673e+06	1.31312e+06	1.2462e+06	1.11673e+06	1.12007e+06	1.13309e+06	1.09398e+06	1.08964e+06	1.08367e+06	1.17566e+06	0.966883	1.11692	1.06	0.949876	0.952712	0.963792	0.930523	0.926834	0.921753
C01536	650422	612264	591616	694696	652432	643834	678736	626907	660340	663516	624737	616916	608612	1.14144	1.072	1.05787	1.11522	1.03006	1.08499	1.09021	1.0265	1.01364
C01541	523109	526582	527185	583443	516421	578436	532304	530684	545494	549977	529037	547371	532529	1.09561	0.969752	1.0862	0.999577	0.996535	1.02435	1.03276	0.993443	1.02787
C01546	265574	273406	259179	281688	301288	279982	249558	259948	266098	267329	263910	267285	265047	1.06279	1.13673	1.05635	0.941563	0.980763	1.00397	1.00861	0.99571	1.00844
C01550	1.39267e+06	1.40206e+06	1.38802e+06	1.46013e+06	1.45205e+06	1.4482e+06	1.43478e+06	1.45355e+06	1.42454e+06	1.44537e+06	1.38946e+06	1.37952e+06	1.40036e+06	1.04268	1.03691	1.03416	1.02457	1.03798	1.01727	1.03214	0.992211	0.985117
C01552	1.88794e+06	1.33336e+06	1.37529e+06	1.31658e+06	1.43656e+06	1.38904e+06	1.28973e+06	1.30157e+06	1.27775e+06	1.26523e+06	1.31278e+06	1.25154e+06	1.46382e+06	0.899417	0.981378	0.948913	0.881069	0.889161	0.872888	0.864338	0.896816	0.854982
C01563	1.05989e+06	1.9756e+06	3.26294e+06	2.80585e+06	1.09921e+06	1.04406e+06	1.03048e+06	1.03435e+06	4.73752e+06	1.87284e+06	1.04614e+06	1.05496e+06	3.31439e+06	0.846566	0.331648	0.315007	0.310909	0.312078	1.42938	0.565062	0.315635	0.318297
C01569	2.66342e+06	1.66593e+06	1.67948e+06	2.11481e+06	2.59614e+06	2.43446e+06	2.04353e+06	2.30968e+06	1.91146e+06	1.88674e+06	1.93001e+06	1.99135e+06	1.97893e+06	1.06866	1.31189	1.23019	1.03265	1.16714	0.96591	0.953416	0.975282	1.00628
C01589	654406	586831	612012	695959	653618	645004	608931	628047	646360	588207	651469	618038	608510	1.14371	1.07413	1.05997	1.00069	1.03211	1.0622	0.966634	1.0706	1.01566
C01594	266081	193161	179517	210750	275899	259030	224623	230085	208059	180360	207954	219780	209133	1.00773	1.31925	1.23859	1.07407	1.10018	0.994867	0.862419	0.994364	1.05091
C01596	384733	299563	260355	383516	397569	434901	392612	383355	346007	370551	387865	387402	334340	1.14708	1.18912	1.30078	1.17429	1.1466	1.0349	1.10831	1.16009	1.15871
C01598	1.45839e+07	2.46191e+07	6.1897e+06	4.76139e+07	2.05738e+07	1.71497e+07	4.97025e+07	1.1813e+08	3.28207e+07	4.73774e+07	4.42127e+07	5.89645e+07	1.96074e+07	2.42837	1.04929	0.874658	2.53489	6.02476	1.67389	2.41631	2.2549	3.00726
C01617	447125	391320	391787	403423	437014	404000	400603	370538	374935	402780	412634	423935	396118	1.01844	1.10324	1.0199	1.01132	0.935424	0.946523	1.01682	1.04169	1.07022
C01618	1.43646e+06	1.5271e+06	1.52001e+06	1.47556e+06	1.56926e+06	1.49793e+06	1.44792e+06	1.50549e+06	1.50332e+06	1.44997e+06	1.48771e+06	1.48842e+06	1.48536e+06	0.993401	1.05648	1.00846	0.974793	1.01355	1.01209	0.976173	1.00158	1.00206
C01620	3.33897e+06	3.31018e+06	3.205e+06	3.38219e+06	3.40068e+06	3.38183e+06	3.01573e+06	2.91517e+06	2.69838e+06	3.0418e+06	3.06567e+06	3.18591e+06	3.16862e+06	1.0674	1.07324	1.06729	0.951748	0.920012	0.851595	0.959976	0.967508	1.00545
C01630	234605	218793	211538	231472	232383	237306	227282	228295	228710	234455	222925	222920	221618	1.04446	1.04857	1.07079	1.02556	1.03013	1.032	1.05792	1.0059	1.00588
C01632	72997.1	63397.7	64071.2	70173.6	86362.3	70459.7	75898.9	62851.3	71939	68972.6	79363.1	71713.4	66039.8	1.0626	1.30773	1.06693	1.14929	0.951718	1.08933	1.04441	1.20175	1.08591
C01657	294699	228611	239941	291924	298392	302161	280154	297953	274894	269667	284777	276867	260455	1.12082	1.14566	1.16013	1.07563	1.14397	1.05544	1.03537	1.09338	1.06301
C01659	1.1319e+06	474625	442454	854449	935902	1.80753e+06	567572	554409	775677	690027	1.02681e+06	683883	802217	1.06511	1.16664	2.25316	0.707504	0.691096	0.966917	0.86015	1.27997	0.852491
C01672	818865	762333	812288	841988	872209	783634	846476	799254	882415	798855	824408	790765	810353	1.03904	1.07633	0.967028	1.04458	0.986304	1.08893	0.985811	1.01734	0.975829
C01674	743251	862132	840741	827878	808497	798479	805848	816676	802723	819823	802474	845235	812277	1.01921	0.995346	0.983013	0.992085	1.00542	0.988237	1.00929	0.987931	1.04057
C01678	1.73019e+06	2.76314e+06	3.55492e+06	1.64037e+06	1.62256e+06	1.49453e+06	1.48724e+06	1.49401e+06	1.49163e+06	1.5667e+06	1.50682e+06	1.51336e+06	2.87456e+06	0.570651	0.564456	0.519914	0.51738	0.519737	0.518906	0.545021	0.524191	0.526466
C01683	449124	428246	435857	491009	452372	410177	463523	487855	466995	466010	453310	492437	441256	1.11275	1.02519	0.929566	1.05046	1.10561	1.05833	1.0561	1.02732	1.11599
C01697	1.6882e+06	3.79975e+06	3.17911e+06	281749	3.17035e+06	3.71983e+06	342238	363784	279347	268314	407035	318642	1.98652e+06	0.141831	1.59593	1.87254	0.17228	0.183126	0.140621	0.135068	0.204899	0.160402
C01700	1.02461e+06	546271	557291	769232	823536	891214	843254	929778	757634	840238	857596	856494	737090	1.04361	1.11728	1.2091	1.14403	1.26142	1.02787	1.13994	1.16349	1.16199
C01708	732940	803878	775703	793473	825858	780776	706980	707951	595241	696614	744500	758613	724650	1.09497	1.13967	1.07745	0.975616	0.976956	0.821418	0.961312	1.02739	1.04687
C01727	777136	825234	853465	921090	793683	815627	877847	901396	880653	940018	885353	900770	839393	1.09733	0.945544	0.971687	1.04581	1.07387	1.04916	1.11988	1.05475	1.07312
C01746	1.84132e+06	1.89295e+06	1.94826e+06	2.06117e+06	1.97684e+06	4.6081e+06	2.0292e+06	1.83176e+06	1.90755e+06	1.98232e+06	2.00124e+06	1.93604e+06	1.91929e+06	1.07392	1.02998	2.40094	1.05726	0.954397	0.993881	1.03284	1.0427	1.00872
C01768	285924	280147	279408	802858	289767	294650	958548	3.23821e+06	909668	940675	819778	1.25127e+06	490495	1.63683	0.590765	0.60072	1.95425	6.60193	1.85459	1.91781	1.67133	2.55104
C01770	2.4268e+08	1.77429e+06	2.78073e+06	7.67854e+07	2.36015e+08	2.66559e+08	4.24938e+07	8.64127e+07	4.10443e+07	8.6118e+07	8.01211e+07	5.27078e+07	7.72006e+07	0.994621	3.05716	3.45281	0.550434	1.11933	0.531658	1.11551	1.03783	0.682739
C01784	332224	242223	224240	311552	344548	318111	319797	316974	263855	301013	315035	330678	272588	1.14294	1.26399	1.167	1.17319	1.16283	0.967964	1.10428	1.15572	1.21311
C01796	123041	62235.1	59453.4	145451	161343	163202	136844	141029	175280	141623	179322	112798	108959	1.33491	1.48076	1.49782	1.25592	1.29432	1.60867	1.29978	1.64576	1.03523
C01804	791160	640570	656273	678056	831712	768790	699586	734274	643947	679749	654024	691228	680348	0.99663	1.22248	1.12999	1.02828	1.07926	0.946496	0.99912	0.961308	1.01599
C01854	406570	326395	298684	435696	420455	423913	373752	412980	311118	419024	396675	398275	350459	1.24321	1.19973	1.20959	1.06646	1.1784	0.887742	1.19564	1.13187	1.13644
C01857	2.58653e+06	272421	438578	696750	556473	313410	727207	335972	581237	674462	284176	406344	879960	0.791797	0.632385	0.356164	0.826409	0.381804	0.660527	0.766469	0.322942	0.461775
C01864	1.05823e+06	1.22256e+06	1.2788e+06	1.32445e+06	1.17016e+06	1.15291e+06	1.31893e+06	1.24287e+06	1.34825e+06	1.28239e+06	1.22163e+06	1.35936e+06	1.21453e+06	1.09051	0.963472	0.949271	1.08596	1.02333	1.1101	1.05588	1.00585	1.11925
C01874	4.35934e+08	4.31129e+08	4.19392e+08	4.46092e+08	4.45785e+08	4.43741e+08	4.3482e+08	4.30534e+08	4.35298e+08	4.39316e+08	4.34403e+08	4.35593e+08	4.28613e+08	1.04078	1.04006	1.0353	1.01448	1.00448	1.0156	1.02497	1.01351	1.01628
C01879	1.31238e+06	797532	801400	1.23417e+06	1.57264e+06	1.65411e+06	953714	931596	973468	1.15948e+06	1.00252e+06	1.14916e+06	1.01994e+06	1.21005	1.5419	1.62178	0.935074	0.913388	0.954442	1.13682	0.982921	1.1267
C01880	612740	628489	551540	598501	631135	579285	628489	610195	588624	593849	612877	623064	604422	0.990204	1.0442	0.958413	1.03982	1.00955	0.973863	0.982508	1.01399	1.03084
C01921	787616	883624	884305	897638	849686	882010	902730	900753	876347	887946	888756	871991	853975	1.05113	0.994978	1.03283	1.05709	1.05478	1.0262	1.03978	1.04073	1.0211
C01964	149207	119091	130437	134624	145833	134817	133683	126999	125117	134409	137698	141469	129262	1.04148	1.1282	1.04297	1.0342	0.982491	0.967935	1.03982	1.06526	1.09443
C01987	570383	462975	440727	555970	589863	594714	578709	579376	440352	528193	587506	558746	496548	1.11967	1.18793	1.1977	1.16546	1.16681	0.886827	1.06373	1.18318	1.12526
C01990	476088	522167	488762	473544	536445	507161	452664	441437	404416	424564	483597	482306	475504	0.995876	1.12816	1.06657	0.951965	0.928356	0.850499	0.89287	1.01702	1.0143
C01993	1.3059e+06	1.4323e+06	1.3821e+06	1.41376e+06	8.68689e+06	2.34998e+08	1.25965e+06	1.26138e+06	1.16451e+06	1.24118e+06	1.3265e+06	1.35165e+06	1.5444e+06	0.915408	5.62476	152.161	0.815623	0.816744	0.754021	0.803665	0.858909	0.875191
C01995	3.21686e+07	2.51274e+06	2.4329e+06	2.51003e+06	3.20607e+07	3.00229e+07	2.20986e+06	1.12986e+07	2.04295e+06	1.47818e+07	9.88614e+06	1.01537e+07	9.90825e+06	0.253327	3.23575	3.03009	0.223032	1.14032	0.206187	1.49187	0.997769	1.02477
C02008	444564	1.00057e+06	542598	526957	462008	451206	481626	799211	523122	510688	8.37386e+06	478036	897108	0.587396	0.514997	0.502956	0.536865	0.890875	0.58312	0.56926	9.33429	0.532864
C02009	262831	166689	159286	200066	249504	227508	185178	332355	188817	176140	190408	197414	192456	1.03954	1.29642	1.18213	0.962183	1.72692	0.981093	0.91522	0.989356	1.02576
C02010	664557	653067	659052	638886	701843	634622	654380	779026	707411	685081	674249	652040	654574	0.976033	1.07221	0.969519	0.999703	1.19013	1.08072	1.04661	1.03006	0.99613
C02027	914822	838924	869678	917771	926726	901102	910162	952517	879824	875617	906860	865255	869541	1.05547	1.06576	1.0363	1.04672	1.09542	1.01183	1.00699	1.04292	0.995071
C02034	908908	908225	905468	957479	951311	946929	936545	919624	923814	907457	904238	919841	911144	1.05085	1.04408	1.03927	1.02788	1.00931	1.01391	0.995953	0.99242	1.00955
C02059	2.5335e+06	800457	773609	1.9812e+06	3.30917e+06	2.36054e+06	2.04497e+06	2.36147e+06	2.00204e+06	2.12025e+06	2.11841e+06	2.02236e+06	1.66705e+06	1.18845	1.98505	1.416	1.2267	1.41656	1.20095	1.27186	1.27076	1.21314
C02066	2.5626e+07	2.86414e+07	2.92854e+07	1.87326e+07	1.91628e+07	2.02068e+07	2.57298e+07	2.56308e+07	2.55759e+07	2.71837e+07	2.87614e+07	2.87505e+07	2.76207e+07	0.678208	0.693784	0.731581	0.93154	0.927957	0.92597	0.984179	1.0413	1.0409
C02067	354905	374389	366252	355546	383763	362126	369623	375360	356344	358980	355080	363740	361196	0.984359	1.06248	1.00257	1.02333	1.03922	0.986568	0.993865	0.983069	1.00704
C02074	761012	747196	754228	3.42531e+07	777452	849582	4.59092e+07	3.8708e+07	4.20488e+07	1.04525e+07	2.31224e+07	8.38413e+06	9.51164e+06	3.60118	0.0817369	0.0893203	4.82663	4.06954	4.42077	1.09892	2.43096	0.881461
C02075	297054	358342	96190.8	697199	286298	289004	248806	259600	245122	233711	244761	372370	259949	2.68206	1.10136	1.11177	0.957131	0.998656	0.942961	0.899065	0.94157	1.43247
C02078	1.50011e+06	1.27937e+06	1.2573e+06	3.48529e+06	1.40772e+06	1.43787e+06	5.82778e+06	1.3239e+06	7.64289e+06	3.75971e+06	4.67989e+06	5.16518e+06	5.03601e+06	0.692073	0.279531	0.285518	1.15722	0.262886	1.51765	0.746567	0.929287	1.02565
C02115	2.41612e+06	2.50895e+06	2.50459e+06	2.72018e+06	2.43657e+06	2.45782e+06	2.22932e+06	2.23238e+06	2.33249e+06	2.25612e+06	2.30409e+06	2.39995e+06	2.44096e+06	1.11439	0.998199	1.00691	0.913294	0.914549	0.95556	0.924275	0.943926	0.983197
C02126	5.48137e+07	4.38049e+07	1.76855e+06	9.83937e+07	7.67627e+07	1.0727e+08	1.64164e+06	1.94652e+07	2.00195e+06	2.65164e+07	3.83917e+07	380715	3.32145e+07	2.96237	2.31112	3.22961	0.0494255	0.586046	0.0602733	0.798338	1.15587	0.0114623
C02134	433107	348204	393223	382198	418990	438346	378606	344545	350015	394561	346479	364836	379966	1.00587	1.1027	1.15364	0.99642	0.906777	0.921174	1.03841	0.911868	0.96018
C02137	340389	338637	343042	371153	336038	376391	340829	345319	351603	357873	342762	342833	339940	1.09182	0.988522	1.10723	1.00262	1.01582	1.03431	1.05275	1.0083	1.00851
C02174	249978	251733	256481	270792	263768	261847	260933	254184	252748	246582	245803	250141	251089	1.07847	1.0505	1.04285	1.03921	1.01233	1.00661	0.982051	0.97895	0.996227
C02199	348600	235362	231101	241111	335592	302473	265165	260482	237343	238328	274206	296687	261552	0.921848	1.28308	1.15645	1.01381	0.995911	0.907442	0.911207	1.04838	1.13433
C02214	753036	605417	683690	664521	728492	710467	658276	599054	608565	686016	602418	634335	660641	1.00587	1.1027	1.07542	0.99642	0.906777	0.921174	1.03841	0.911868	0.96018
C02218	572758	603541	584363	547339	548453	616606	505583	503788	486289	490727	557405	580883	567993	0.963637	0.965598	1.08559	0.890121	0.886961	0.856153	0.863966	0.981359	1.02269
C02223	642567	1.10986e+07	1.87021e+07	1.54135e+07	655112	624380	647924	636357	684619	4.44505e+07	624448	608129	7.96687e+06	1.9347	0.0822295	0.078372	0.0813273	0.0798753	0.0859333	5.57941	0.0783806	0.0763323
C02224	296305	211668	195936	220982	266520	272540	240710	264681	232684	233198	231922	236693	234657	0.941723	1.13579	1.16144	1.02579	1.12795	0.991589	0.993781	0.988346	1.00868
C02234	94613.6	174362	86845.7	102055	106608	100789	86961.6	75944.9	78545.5	81260.6	94323.5	89716.6	106669	0.956744	0.999428	0.944871	0.815245	0.711966	0.736345	0.761799	0.884261	0.841072
C02240	1.27394e+06	867526	874317	1.29801e+06	1.53045e+06	1.3535e+06	1.00305e+06	979788	1.0062e+06	1.21946e+06	1.08022e+06	1.2086e+06	1.05854e+06	1.22623	1.44581	1.27865	0.947577	0.925601	0.95055	1.15202	1.02048	1.14176
C02242	8.72734e+06	2.72155e+06	2.40882e+06	4.50453e+06	5.53482e+06	6.42556e+06	4.32274e+06	4.80573e+06	3.97513e+06	5.17792e+06	6.22935e+06	5.96981e+06	4.45209e+06	1.01178	1.2432	1.44327	0.970946	1.07943	0.892867	1.16303	1.39919	1.3409
C02243	937385	1.0385e+06	1.05844e+06	1.14197e+06	969814	1.00416e+06	1.07965e+06	1.1625e+06	1.05709e+06	1.0472e+06	1.082e+06	1.07157e+06	1.03573e+06	1.10257	0.936359	0.969515	1.0424	1.1224	1.02062	1.01108	1.04467	1.0346
C02304	293171	308527	310158	327490	310821	319167	309144	284571	316467	310282	311550	329333	308962	1.05997	1.00602	1.03303	1.00059	0.921056	1.02429	1.00427	1.00838	1.06593
C02334	3.29092e+08	6.26615e+06	1.28591e+06	3.69083e+08	1.71319e+08	3.28664e+08	3.30741e+07	2.15457e+08	5.32971e+07	1.93876e+08	1.99854e+08	1.93002e+08	1.4574e+08	2.53247	1.17551	2.25514	0.226939	1.47836	0.365699	1.33028	1.3713	1.32428
C02341	4.02399e+07	9.17861e+07	6.09614e+07	3.20236e+07	4.78707e+07	1.53119e+08	1.42588e+08	1.42363e+08	2.50696e+07	3.00362e+07	4.39866e+07	1.43477e+08	5.25705e+07	0.609154	0.910599	2.91264	2.71232	2.70803	0.476876	0.57135	0.836716	2.72922
C02351	600554	488561	470750	611538	622854	591349	610691	612986	497670	566300	619974	609493	518868	1.1786	1.20041	1.13969	1.17697	1.18139	0.959144	1.09141	1.19486	1.17466
C02362	1.72202e+06	1.91368e+06	1.89697e+06	1.88005e+06	1.76888e+06	1.88927e+06	1.88519e+06	1.84788e+06	1.89678e+06	1.92497e+06	1.84958e+06	1.87774e+06	1.83342e+06	1.02543	0.964798	1.03046	1.02824	1.00789	1.03456	1.04993	1.00882	1.02418
C02366	6.12003e+07	1.16356e+06	1.19645e+06	1.8775e+07	9.43286e+07	3.09571e+07	3.49587e+07	6.35904e+07	1.48501e+07	1.57182e+07	3.78699e+07	6.32202e+07	1.94707e+07	0.964266	4.84464	1.58993	1.79545	3.26595	0.76269	0.807274	1.94496	3.24693
C02367	227980	162158	146044	190086	241510	222451	191118	201923	182678	167530	171529	182762	179366	1.05977	1.34647	1.24021	1.06552	1.12576	1.01846	0.93401	0.956307	1.01894
C02372	800685	771532	827625	887993	911282	803294	835409	878924	837782	837983	851034	887179	793411	1.11921	1.14856	1.01246	1.05293	1.10778	1.05592	1.05618	1.07263	1.11818
C02376	410491	333192	317181	400118	418956	428001	416483	416963	316911	350960	422814	390462	350531	1.14146	1.1952	1.22101	1.18815	1.18952	0.904088	1.00122	1.20621	1.11391
C02389	826345	462051	436144	860099	1.42482e+06	1.08704e+06	1.0065e+06	714288	451697	839226	724394	760873	542615	1.5851	2.62583	2.00334	1.8549	1.31638	0.832444	1.54663	1.335	1.40223
C02395	912781	848616	881997	4.62461e+06	883232	802136	3.07609e+06	7.01049e+06	1.67864e+06	6.92036e+06	5.08257e+06	5.69273e+06	1.63864e+06	2.82222	0.539002	0.489513	1.87722	4.27823	1.02441	4.22323	3.10169	3.47405
C02413	6.9941e+06	7.45373e+07	9.55238e+06	5.99653e+07	1.04637e+08	5.66723e+07	6.58258e+07	4.97418e+07	6.46698e+07	1.13179e+07	6.4548e+07	9.09119e+07	3.10309e+07	1.93244	3.37202	1.82631	2.1213	1.60298	2.08404	0.364729	2.08012	2.92972
C02420	586832	331090	356040	445803	579292	556686	461165	510087	411839	422420	439103	573707	419701	1.06219	1.38025	1.32639	1.09879	1.21536	0.981268	1.00648	1.04623	1.36694
C02445	287107	309800	303743	322747	282303	277109	288151	278685	309922	298654	305106	278580	299629	1.07715	0.942175	0.924842	0.961693	0.930102	1.03435	0.996746	1.01828	0.929751
C02455	1.14345e+08	2.38995e+08	2.45381e+08	1.07264e+08	9.42593e+07	9.81488e+07	1.23293e+08	1.1021e+08	1.27796e+08	1.16303e+08	1.10663e+08	1.23006e+08	1.71913e+08	0.623944	0.548297	0.570922	0.717183	0.641081	0.743375	0.676522	0.643713	0.715516
C02486	1.27624e+06	1.34483e+06	1.3021e+06	1.37408e+06	1.22208e+06	1.37394e+06	1.2252e+06	1.12256e+06	1.08356e+06	1.09345e+06	1.24203e+06	1.29434e+06	1.26562e+06	1.0857	0.965598	1.08559	0.968066	0.886961	0.856153	0.863966	0.981359	1.02269
C02494	389705	302295	304711	359247	410296	408783	307391	321163	304788	341462	364546	342778	330243	1.08783	1.2424	1.23782	0.9308	0.972505	0.922918	1.03397	1.10387	1.03796
C02499	265257	164807	155505	217922	240493	250276	193790	228948	196968	182646	178868	194362	192535	1.13185	1.24909	1.2999	1.00652	1.18912	1.02302	0.948638	0.929015	1.00949
C02502	739460	573601	578186	1.144e+06	778531	775660	607419	609403	578330	647920	691721	715173	626632	1.82563	1.2424	1.23782	0.969339	0.972505	0.922918	1.03397	1.10387	1.1413
C02571	438097	293718	306601	409481	466231	443977	355208	344468	344913	416561	383544	427823	360059	1.13726	1.29488	1.23307	0.986527	0.956698	0.957936	1.15693	1.06523	1.1882
C02572	322219	265809	266531	287159	436518	289468	291819	370769	268740	273466	290405	291404	277732	1.03395	1.57173	1.04226	1.05072	1.33499	0.967624	0.984642	1.04563	1.04923
C02590	2.19545e+06	1.90414e+06	1.86523e+06	1.97755e+06	2.27163e+06	2.04354e+06	1.90356e+06	2.08326e+06	1.87311e+06	2.00788e+06	1.98552e+06	2.00494e+06	1.99165e+06	0.992916	1.14057	1.02605	0.955769	1.046	0.940479	1.00814	0.996919	1.00667
C02604	528009	433507	445758	486742	555907	553857	459077	439177	412955	462645	493921	520662	458911	1.06064	1.21136	1.20689	1.00036	0.956997	0.899857	1.00814	1.07629	1.13456
C02617	335256	276564	277315	298778	454179	301180	303625	385770	279613	284530	302154	303194	288968	1.03395	1.57173	1.04226	1.05072	1.33499	0.967624	0.984642	1.04563	1.04923
C02621	513320	546234	542318	590151	533759	542433	577769	606197	586603	632171	578252	605776	549413	1.07415	0.971508	0.987296	1.05161	1.10335	1.06769	1.15063	1.05249	1.10259
C02628	819053	880709	888927	897062	838709	841279	868753	887127	847680	836008	845861	859535	852918	1.05176	0.983341	0.986354	1.01857	1.04011	0.993858	0.980173	0.991725	1.00776
C02630	2.6805e+06	1.92352e+06	2.00887e+06	1.89846e+06	2.60097e+06	2.32581e+06	2.03894e+06	2.56432e+06	1.82501e+06	1.89544e+06	2.10846e+06	2.28132e+06	2.07823e+06	0.913497	1.25153	1.11913	0.98109	1.23389	0.878152	0.912041	1.01454	1.09772
C02633	585380	490200	501651	514873	603423	602066	533017	555793	525336	529909	532615	545350	522229	0.985913	1.15548	1.15288	1.02066	1.06427	1.00595	1.01471	1.01989	1.04427
C02636	475657	430797	444688	463636	466339	541798	481656	517185	419502	463641	438061	479831	448170	1.03451	1.04054	1.20891	1.07472	1.15399	0.936033	1.03452	0.977444	1.07064
C02640	803447	811181	746237	756463	755645	796822	788395	793084	772933	753312	766356	750482	787837	0.960178	0.959139	1.0114	1.00071	1.00666	0.981082	0.956177	0.972734	0.952586
C02646	874541	1.22e+06	999275	807327	913273	901527	848176	984082	1.15938e+06	843613	824307	800774	1.04041e+06	0.775968	0.877798	0.866509	0.81523	0.945858	1.11434	0.810844	0.792289	0.76967
C02647	317119	245990	247956	292334	333875	332643	250136	261344	248018	277862	296646	278932	268733	1.08783	1.2424	1.23782	0.9308	0.972505	0.922918	1.03397	1.10387	1.03796
C02648	2.97856e+06	2.83502e+06	2.85905e+06	3.01711e+06	3.02575e+06	3.0168e+06	2.69021e+06	2.46482e+06	2.40712e+06	2.71347e+06	2.72715e+06	2.84202e+06	2.79564e+06	1.07922	1.08231	1.07911	0.962288	0.881667	0.861025	0.970606	0.975501	1.01659
C02659	1.91525e+07	1.32563e+06	637420	4.90023e+06	1.75491e+07	1.48403e+07	1.87797e+06	9.97436e+06	7.15177e+06	9.91889e+06	2.49679e+06	1.18251e+06	6.59763e+06	0.742726	2.65992	2.24934	0.284643	1.51181	1.08399	1.5034	0.378438	0.179232
C02678	668314	676220	682015	635579	678242	635629	703392	750906	646561	704847	693799	687844	659915	0.963122	1.02777	0.963199	1.06588	1.13788	0.979765	1.06809	1.05135	1.04232
C02683	563857	487034	487844	502162	605724	551599	473910	484210	462537	521353	467438	455023	499353	1.00563	1.21302	1.10463	0.949049	0.969676	0.926272	1.04406	0.936088	0.911226
C02703	554306	336850	314018	521272	664228	698638	402817	393475	506525	1.78976e+06	422845	485365	434089	1.20084	1.53016	1.60943	0.927958	0.906437	1.16687	4.12301	0.974097	1.11812
C02704	1.21357e+06	407587	448258	441121	4.92664e+06	729453	444383	542753	430764	408556	755712	631824	613566	0.718946	8.02952	1.18887	0.724263	0.884588	0.702066	0.665872	1.23167	1.02976
C02724	397994	326762	335997	366888	419023	417478	346035	331036	311270	348725	341688	392457	345911	1.06064	1.21136	1.20689	1.00036	0.956997	0.899857	1.00814	0.987791	1.13456
C02726	4.89157e+06	4.86637e+06	4.71267e+06	5.13989e+06	5.5604e+06	5.5821e+06	4.85355e+06	4.99485e+06	4.98726e+06	5.02215e+06	4.97887e+06	5.09958e+06	4.87452e+06	1.05444	1.14071	1.14516	0.995699	1.02469	1.02313	1.03029	1.02141	1.04617
C02730	401333	284973	304418	316339	392492	350113	343145	447355	318083	319036	337578	344620	322729	0.9802	1.21617	1.08485	1.06326	1.38616	0.985606	0.988557	1.04601	1.06783
C02735	890637	901048	908684	958921	852843	958822	849590	783390	756179	729832	1.22148e+06	903272	873864	1.09733	0.975945	1.09722	0.972221	0.896466	0.865327	0.835178	1.39779	1.03365
C02771	157381	161846	156575	161631	159002	164103	159776	159605	163022	159968	157395	156479	159037	1.01631	0.999781	1.03185	1.00465	1.00357	1.02506	1.00585	0.98968	0.983918
C02777	236563	238259	223794	253148	212476	228222	240985	232048	249580	257789	242460	252900	233185	1.08561	0.911191	0.978718	1.03345	0.995124	1.07031	1.10551	1.03977	1.08455
C02787	9.71886e+06	1.18426e+08	2.14177e+07	2.75839e+07	9.11287e+07	2.69801e+07	1.01646e+08	9.71407e+07	1.04718e+08	9.75302e+07	9.66494e+07	9.74627e+07	7.19166e+07	0.383554	1.26714	0.375159	1.41339	1.35074	1.4561	1.35616	1.34391	1.35522
C02794	38678.9	37936.7	36118.6	40782.7	39355.2	37584.3	39602.2	39917.8	39488	37472.3	36984.7	36713.7	37685	1.0822	1.04432	0.997329	1.05087	1.05925	1.04784	0.994357	0.981417	0.974225
C02845	535505	476556	500814	485660	486787	453941	498292	503841	528920	474019	533102	490546	495164	0.980806	0.983082	0.916749	1.00632	1.01752	1.06817	0.957298	1.07662	0.990674
C02862	249252	153279	151527	192507	259917	243874	188833	223091	175664	171537	181833	189390	183920	1.04669	1.4132	1.32598	1.02671	1.21298	0.955112	0.932669	0.988653	1.02974
C02890	779348	935809	801271	2.57532e+06	755148	764486	1.86754e+06	4.76454e+06	929648	2.08997e+06	1.38828e+07	2.06684e+06	1.42918e+06	1.80195	0.528378	0.534912	1.30672	3.33375	0.650476	1.46235	9.71379	1.44617
C02916	394864	256626	250897	274907	383149	342615	297995	377750	268842	271227	310597	312790	291236	0.94393	1.3156	1.17642	1.02321	1.29706	0.923105	0.931296	1.06648	1.07401
C02918	1.19709e+06	548981	487744	753447	1.33093e+06	1.36229e+06	690434	849273	695607	709303	788436	820622	762087	0.988662	1.74643	1.78758	0.905978	1.1144	0.912765	0.930737	1.03457	1.07681
C02923	724010	443108	413074	685705	873756	799730	529883	517595	540859	644208	556230	638471	557181	1.23067	1.56817	1.43531	0.951007	0.928952	0.970705	1.15619	0.998293	1.1459
C02927	5.07929e+06	6.04524e+06	6.18091e+06	760286	1.9093e+06	2.50529e+06	5.71232e+06	1.96495e+06	711375	1.28924e+07	1.61011e+06	1.94166e+06	4.50012e+06	0.168948	0.424278	0.556717	1.26937	0.436644	0.158079	2.8649	0.357794	0.431468
C02937	2.76029e+06	930683	835150	3.13109e+06	2.99424e+06	2.88623e+06	2.81901e+06	3.06115e+06	2.51411e+06	2.78437e+06	2.68752e+06	3.12081e+06	1.93767e+06	1.6159	1.54528	1.48954	1.45485	1.57981	1.29749	1.43697	1.38699	1.6106
C02947	284704	234862	235500	253727	385696	255767	308199	327602	251563	241628	291870	286950	245397	1.03395	1.57173	1.04226	1.25592	1.33499	1.02513	0.984642	1.18938	1.16933
C02951	452093	305237	299711	314750	438681	392272	343888	368810	307806	310538	355614	363023	339202	0.927914	1.29327	1.15645	1.01381	1.08729	0.907442	0.915494	1.04838	1.07023
C02954	1.01666e+06	930434	949312	996778	983400	1.00339e+06	970117	1.06713e+06	958569	946214	962060	970987	965207	1.03271	1.01885	1.03956	1.00509	1.1056	0.993124	0.980323	0.99674	1.00599
C02979	54862.6	59824.3	56571.4	61158.5	61143	58919.3	59317.1	58928.6	57313.7	55993.8	55926.2	60334.8	55961.1	1.09287	1.0926	1.05286	1.05997	1.05303	1.02417	1.00058	0.999377	1.07816
C02990	1.73807e+06	1.88933e+06	1.86603e+06	4.82008e+06	1.75049e+06	1.7786e+06	4.0142e+06	4.64207e+06	3.72353e+06	4.14102e+06	4.10961e+06	4.22103e+06	2.4125e+06	1.99796	0.725594	0.737244	1.66392	1.92418	1.54343	1.71649	1.70347	1.74965
C03002	120354	132010	130843	139612	123971	123778	116053	121054	134364	137736	118640	119431	2.13424e+06	0.0654157	0.0580867	0.0579964	0.054377	0.0567199	0.0629565	0.0645366	0.0555892	0.0559597
C03007	594012	483239	465621	604876	637968	611999	604038	606308	492248	566499	613220	602853	519460	1.16443	1.22814	1.17814	1.16282	1.16719	0.947614	1.09055	1.1805	1.16054
C03017	430151	333669	336336	396532	452879	451208	339293	354495	336420	376901	402380	378353	364518	1.08783	1.2424	1.23782	0.9308	0.972505	0.922918	1.03397	1.10387	1.03796
C03019	694934	786114	797936	820309	719954	745406	798223	795871	804017	777852	802622	829709	773720	1.06021	0.930511	0.963406	1.03167	1.02863	1.03916	1.00534	1.03736	1.07236
C03032	1.69505e+06	1.74314e+06	1.68637e+06	1.76935e+06	1.75104e+06	1.76745e+06	1.75223e+06	1.72403e+06	1.75582e+06	1.72291e+06	1.69521e+06	1.71954e+06	1.71289e+06	1.03296	1.02227	1.03185	1.02297	1.0065	1.02506	1.00585	0.98968	1.00388
C03033	936442	895002	911948	940827	1.04117e+06	980717	931551	937599	929682	979949	963801	944314	933510	1.00784	1.11532	1.05057	0.997901	1.00438	0.995899	1.04975	1.03245	1.01157
C03047	368495	220777	223383	282273	326137	330604	323836	364815	305389	321581	337510	308659	287309	0.982473	1.13514	1.15069	1.12714	1.26977	1.06293	1.11929	1.17473	1.07431
C03059	4.2499e+06	4.39245e+06	4.41558e+06	4.84483e+06	4.48036e+06	4.6816e+06	4.59903e+06	4.35456e+06	4.48376e+06	4.63124e+06	4.62094e+06	4.59893e+06	4.39466e+06	1.10244	1.0195	1.06529	1.0465	0.990875	1.02028	1.05383	1.05149	1.04648
C03065	1.66108e+06	1.70766e+06	1.75756e+06	1.92841e+06	1.78334e+06	1.72868e+06	1.83057e+06	1.64872e+06	1.74863e+06	1.76222e+06	1.80535e+06	1.71954e+06	1.71733e+06	1.12291	1.03844	1.00661	1.06594	0.960049	1.01823	1.02614	1.05125	1.00129
C03066	2.16922e+08	525522	495656	3.54857e+06	1.70479e+08	1.58262e+08	9.76588e+06	1.1751e+07	665882	1.89396e+06	1.74079e+07	1.70555e+07	5.48411e+07	0.0647063	3.10859	2.88584	0.178076	0.214273	0.012142	0.0345354	0.317424	0.310999
C03093	751626	726786	759037	662563	715232	767337	699371	656165	681911	677794	712778	714874	711085	0.931763	1.00583	1.07911	0.983527	0.922766	0.958973	0.953182	1.00238	1.00533
C03113	2.94082e+08	4.25975e+08	4.265e+08	2.78587e+08	3.17973e+08	3.4313e+08	2.95274e+08	1.14713e+08	3.64597e+08	1.76862e+08	1.70456e+08	1.4549e+08	3.64033e+08	0.76528	0.873473	0.942581	0.811118	0.315118	1.00155	0.485841	0.468242	0.399662
C03124	2.60813e+06	1.84481e+06	1.95464e+06	1.84721e+06	2.53075e+06	2.26302e+06	1.98389e+06	2.49509e+06	1.77573e+06	1.84426e+06	2.05154e+06	2.21973e+06	2.01543e+06	0.916531	1.25569	1.12284	0.984349	1.23799	0.881069	0.915071	1.01791	1.10137
C03134	580701	571663	520773	1.22835e+06	548041	583248	1.07224e+06	1.27874e+06	981696	1.16466e+06	1.08965e+06	1.3295e+06	718834	1.70881	0.762403	0.81138	1.49164	1.77891	1.36568	1.6202	1.51586	1.84952
C03137	738212	788829	813213	804280	754925	794036	790412	792167	813129	759052	792898	752983	777865	1.03396	0.970509	1.02079	1.01613	1.01839	1.04533	0.975814	1.01933	0.968012
C03150	536527	535393	534912	572798	559922	552593	535674	549828	518489	544590	557891	544073	523226	1.09474	1.07013	1.05613	1.02379	1.05084	0.990947	1.04083	1.06625	1.03984
C03154	631439	741389	741961	753148	712915	740035	757421	755762	735284	745016	745696	731629	709164	1.06202	1.00529	1.04353	1.06805	1.06571	1.03683	1.05056	1.05151	1.03168
C03167	194748	196110	194750	200969	213805	207666	197906	197983	192948	196570	197666	208461	194520	1.03315	1.09914	1.06758	1.01741	1.01781	0.991923	1.01054	1.01618	1.07167
C03169	119272	116524	115919	117894	118984	121380	121735	120502	120265	114281	114590	114170	117183	1.00607	1.01537	1.03582	1.03885	1.02832	1.0263	0.975235	0.977871	0.974287
C03183	239284	191344	197930	213248	292097	204234	190139	253759	199570	203080	209167	209693	204735	1.04158	1.42671	0.997551	0.928709	1.23945	0.974772	0.991915	1.02165	1.02422
C03196	91759.4	92051.5	93724	94431.2	100686	93638.7	98068.2	91919.2	94304.1	91433.2	91847	90577.8	91570.1	1.03124	1.09955	1.02259	1.07096	1.00381	1.02986	0.998504	1.00302	0.989163
C03205	1.28336e+06	954208	937976	994956	1.23514e+06	1.20518e+06	970894	1.08103e+06	952447	931491	968378	966986	1.0257e+06	0.970024	1.20419	1.17498	0.946565	1.05394	0.928581	0.90815	0.944112	0.942755
C03210	219273	249519	252047	240469	225832	229440	246327	240414	235188	231957	232029	239165	236381	1.01729	0.955372	0.970632	1.04207	1.01706	0.994953	0.981283	0.981588	1.01177
C03215	482864	542642	540977	531407	508154	518169	533484	537920	540053	527476	506996	527107	521833	1.01835	0.973787	0.992979	1.02233	1.03083	1.03492	1.01081	0.971567	1.01011
C03218	3.74178e+06	3.22319e+06	3.32455e+06	3.19864e+06	3.666e+06	3.47916e+06	3.11772e+06	3.164e+06	3.19977e+06	3.05851e+06	3.17344e+06	3.22222e+06	3.35934e+06	0.952161	1.09129	1.03567	0.928073	0.94185	0.9525	0.91045	0.944661	0.959183
C03219	821298	341488	326122	516923	869552	895502	458618	582667	464815	476907	775788	563011	506469	1.02064	1.71689	1.76813	0.90552	1.15045	0.917757	0.94163	1.53176	1.11164
C03228	675338	444655	446812	688098	779786	707971	531733	519401	514244	607057	558941	623469	546990	1.25797	1.42559	1.2943	0.972106	0.949562	0.940133	1.10981	1.02185	1.13982
C03232	9.5619e+06	9.36484e+06	9.48018e+06	9.18098e+06	9.55919e+06	9.65939e+06	9.3193e+06	9.33775e+06	9.37314e+06	9.4274e+06	1.00483e+07	9.69659e+06	9.48548e+06	0.967898	1.00777	1.01833	0.982481	0.984426	0.988156	0.993877	1.05934	1.02226
C03283	635572	468504	469122	618788	659149	626075	617479	620254	504777	579529	605229	632614	532147	1.16281	1.23866	1.17651	1.16035	1.16557	0.948567	1.08904	1.13734	1.1888
C03292	251611	183208	182253	193434	236579	219962	201455	226863	190951	185198	199300	196911	202989	0.95293	1.16548	1.08362	0.992444	1.11761	0.940698	0.912354	0.981829	0.970056
C03299	1.10059e+06	961036	944457	960486	1.20142e+06	1.0895e+06	931818	994481	933498	928886	919751	964714	994761	0.965544	1.20775	1.09524	0.936725	0.999718	0.938415	0.933778	0.924594	0.969795
C03373	529797	220089	210186	352357	603251	583989	295579	375528	299573	311624	349356	342251	327710	1.07521	1.84081	1.78203	0.901952	1.14592	0.91414	0.950912	1.06605	1.04437
C03406	789677	846509	819772	810628	943833	929947	818784	868859	825532	826752	856467	861009	821126	0.987216	1.14944	1.13253	0.997148	1.05813	1.00537	1.00685	1.04304	1.04857
C03411	1.07298e+06	921894	967388	1.04505e+06	1.04258e+06	1.00819e+06	1.10293e+06	1.01206e+06	1.08395e+06	1.06967e+06	1.11898e+06	1.13097e+06	994141	1.05121	1.04872	1.01413	1.10943	1.01803	1.09034	1.07598	1.12558	1.13764
C03414	7.08018e+06	547531	551232	1.29908e+06	6.93675e+06	6.47868e+06	1.22226e+06	1.79432e+06	957777	1.20725e+06	1.05981e+06	1.38019e+06	2.32697e+06	0.558272	2.98102	2.78417	0.525258	0.771098	0.411598	0.518809	0.455445	0.593129
C03434	583651	265479	276924	244235	265897	285268	260510	968717	246376	239653	258659	252862	337175	0.724356	0.788601	0.846051	0.772625	2.87304	0.730704	0.710767	0.767134	0.749942
C03470	255993	261897	278351	285769	311764	316028	279172	273630	259477	297226	282577	301808	264547	1.08022	1.17849	1.1946	1.05529	1.03433	0.980835	1.12353	1.06815	1.14085
C03494	2.79597e+06	1.54917e+07	2.33939e+06	2.09716e+07	2.08508e+06	2.31655e+06	2.03457e+06	5.43841e+06	3.05691e+06	1.30294e+07	1.07989e+07	2.48932e+06	6.94933e+06	3.01778	0.300041	0.333348	0.292772	0.78258	0.439885	1.87491	1.55395	0.35821
C03495	212407	161515	167858	178689	212887	192688	196004	255529	181689	182233	192824	190298	178580	1.00061	1.19211	1.079	1.09757	1.43089	1.01741	1.02045	1.07976	1.06561
C03506	617377	413915	432070	568098	657026	625664	500568	466285	472794	510154	540500	602900	506915	1.1207	1.29613	1.23426	0.98748	0.919848	0.93269	1.00639	1.06625	1.18935
C03515	5.40963e+06	5.11983e+06	4.98464e+06	5.35425e+06	5.36415e+06	5.63333e+06	5.2998e+06	5.3907e+06	5.39686e+06	5.06893e+06	5.16678e+06	5.01911e+06	5.10383e+06	1.04906	1.051	1.10374	1.0384	1.05621	1.05741	0.99316	1.01233	0.9834
C03526	390066	247583	255313	282847	394215	326920	298123	388660	276553	279061	305162	321825	289205	0.978013	1.3631	1.13041	1.03084	1.34389	0.95625	0.964922	1.05517	1.11279
C03576	684516	501074	449898	622389	687283	722728	590809	583983	527534	629697	612480	671485	546631	1.13859	1.25731	1.32215	1.08082	1.06833	0.965064	1.15196	1.12046	1.22841
C03584	1.2549e+06	260308	250879	281216	2.34857e+06	2.14789e+06	341590	407972	278818	267806	437362	318039	505132	0.556718	4.64942	4.25213	0.67624	0.807654	0.551971	0.530171	0.865837	0.629616
C03592	7.178e+06	1.67282e+07	3.03894e+06	7.70752e+06	9.79818e+06	8.44668e+06	6.89257e+06	8.10602e+06	5.13449e+06	2.98757e+06	4.20676e+06	5.02542e+06	7.98285e+06	0.96551	1.2274	1.0581	0.863422	1.01543	0.64319	0.374249	0.526974	0.629526
C03626	387802	161101	153852	243865	441569	427470	216359	274880	219282	224987	255723	250521	239878	1.01662	1.84081	1.78203	0.901952	1.14592	0.91414	0.93792	1.06605	1.04437
C03657	351425	223057	230021	254827	355163	294535	268591	350158	249157	251416	274932	289944	260556	0.978013	1.3631	1.13041	1.03084	1.34389	0.95625	0.964922	1.05517	1.11279
C03661	238299	228230	231287	254408	248689	245434	237920	240711	227096	238151	247787	232069	227882	1.1164	1.09131	1.07702	1.04405	1.0563	0.996552	1.04506	1.08735	1.01837
C03690	1.36577e+08	1.74285e+06	908048	3.36091e+08	1.79401e+08	1.73365e+08	2.55071e+08	2.81615e+08	2.35095e+07	1.98037e+08	2.64566e+08	1.73873e+08	1.28662e+08	2.61219	1.39436	1.34744	1.98248	2.18879	0.182722	1.53919	2.05628	1.35139
C03691	2.00437e+06	4.22618e+06	2.74667e+06	5.75804e+06	4.93439e+06	6.69719e+06	4.19345e+06	5.06755e+06	4.67761e+06	3.40931e+06	4.16055e+06	3.97555e+06	2.99619e+06	1.92179	1.64689	2.23523	1.39959	1.69133	1.56119	1.13788	1.38861	1.32687
C03725	1.77673e+06	1.61878e+06	1.5951e+06	1.79715e+06	1.73993e+06	1.6966e+06	1.78411e+06	1.97894e+06	1.64022e+06	1.74846e+06	1.81904e+06	1.85193e+06	1.68494e+06	1.0666	1.03264	1.00692	1.05886	1.17449	0.973462	1.0377	1.07959	1.09911
C03750	297658	238023	246215	265271	363355	254057	246166	342507	248255	252621	268269	269192	254681	1.04158	1.42671	0.997551	0.966566	1.34485	0.974772	0.991915	1.05335	1.05698
C03767	289171	348085	340302	340386	278949	291102	319553	355473	306280	321658	333188	320654	319805	1.06436	0.872248	0.910249	0.999212	1.11153	0.957709	1.0058	1.04185	1.00266
C03837	336178	268826	278078	299600	410377	286935	278022	386832	280382	285314	302986	304028	287639	1.04158	1.42671	0.997551	0.966566	1.34485	0.974772	0.991915	1.05335	1.05698
C03840	1.09571e+09	3.53167e+09	3.65214e+09	3.27922e+09	1.60731e+09	1.97046e+09	2.60962e+09	2.04916e+09	2.67008e+09	3.17871e+09	2.96369e+09	2.94137e+09	2.78478e+09	1.17755	0.577177	0.707581	0.937102	0.735841	0.958813	1.14146	1.06424	1.05623
C03861	2.71129e+06	2.78599e+06	2.7364e+06	2.8332e+06	2.75564e+06	2.71686e+06	2.76424e+06	2.75819e+06	2.75391e+06	2.78031e+06	2.86e+06	2.74405e+06	2.74216e+06	1.0332	1.00492	0.990775	1.00805	1.00584	1.00428	1.01391	1.04297	1.00069
C03872	481125	505737	501627	510896	493634	478559	507463	526783	494867	484027	491267	513385	491748	1.03894	1.00383	0.973178	1.03196	1.07124	1.00634	0.984298	0.999021	1.044
C03882	1.59719e+06	1.53218e+06	1.56755e+06	1.48309e+06	1.62041e+06	1.66152e+06	1.48002e+06	1.29409e+06	1.62231e+06	1.56784e+06	1.5357e+06	1.4389e+06	1.52687e+06	0.971327	1.06126	1.08819	0.969319	0.847547	1.06251	1.02683	1.00578	0.942386
C03912	2.60073e+07	3.52096e+07	3.16037e+07	2.90773e+07	3.1481e+07	3.28123e+07	3.03485e+07	2.9082e+07	3.13371e+07	1.97791e+07	2.20336e+07	2.27909e+07	2.851e+07	1.0199	1.10421	1.15091	1.06449	1.02006	1.09916	0.693761	0.772838	0.799399
C03930	579268	440367	423464	455412	544661	531740	467823	528793	487719	426369	458837	461376	478783	0.951185	1.13759	1.11061	0.977109	1.10445	1.01866	0.890527	0.958339	0.963643
C03943	686015	1.04649e+06	941848	3.22346e+06	691822	2.81206e+06	2.45498e+06	1.75605e+06	1.57381e+06	1.678e+06	1.24111e+06	2.24844e+06	1.02343e+06	3.14966	0.675982	2.74768	2.39877	1.71584	1.53778	1.63958	1.21269	2.19696
C03954	368204	303744	304569	328141	498815	330779	343251	423683	325342	312493	358918	332991	317368	1.03395	1.57173	1.04226	1.08156	1.33499	1.02513	0.984642	1.13092	1.04923
C03958	936396	192790	190915	596042	1.43779e+06	1.91953e+06	487308	2.72475e+06	761149	4.35194e+06	876494	2.79711e+06	562896	1.05888	2.55427	3.41009	0.865716	4.8406	1.3522	7.73135	1.55711	4.96914
C03972	831712	786780	770058	796516	788902	807997	758377	775104	742356	744976	774161	759802	789120	1.00937	0.999723	1.02392	0.961041	0.982238	0.940738	0.944058	0.981044	0.962847
C03982	2.46855e+06	1.08762e+06	746071	557798	3.75526e+06	951821	533203	519980	758083	520448	569641	568120	1.18357e+06	0.471283	3.17282	0.804193	0.450503	0.43933	0.640504	0.439726	0.481289	0.480004
C04006	110539	214270	344661	366739	332390	168647	1.13573e+06	239515	207583	278081	175477	330919	233894	1.56797	1.42111	0.72104	4.85574	1.02404	0.887509	1.18892	0.750243	1.41483
C04015	232726	231697	238471	238483	245971	239318	239002	239557	236619	243176	237797	247670	232017	1.02787	1.06014	1.03146	1.0301	1.0325	1.01983	1.04809	1.02491	1.06746
C04020	1.43845e+07	231530	229168	1.23385e+06	1.6033e+07	3.52285e+06	1.17433e+06	3.40722e+06	1.24298e+06	1.38158e+06	1.62261e+06	1.23858e+06	4.19024e+06	0.294458	3.82627	0.840727	0.280255	0.813133	0.296637	0.329715	0.387235	0.295586
C04022	307040	259299	251437	277030	300097	258514	293830	284187	259932	276589	299560	332899	266725	1.03864	1.12512	0.969217	1.10162	1.06547	0.974532	1.03698	1.1231	1.2481
C04033	2.15446e+09	1.21155e+09	1.28403e+09	1.54022e+09	2.27858e+09	2.20154e+09	1.51447e+09	1.60934e+09	1.45049e+09	1.59622e+09	1.67321e+09	1.67867e+09	1.53407e+09	1.00401	1.48532	1.4351	0.987223	1.04907	0.945522	1.04052	1.0907	1.09426
C04039	291996	193563	185660	233559	295399	287497	227137	253550	222365	201495	193653	218769	218994	1.06651	1.34889	1.31281	1.03719	1.1578	1.01539	0.920094	0.884288	0.998973
C04067	79136	90127.8	87201.4	93665	87946.4	87025.1	86488	80979.5	83524.3	92011.7	77048.8	79966.7	84759	1.10507	1.03761	1.02674	1.0204	0.955408	0.985432	1.08557	0.909034	0.943459
C04070	199208	219501	243435	224192	218051	220642	223238	222523	217639	373789	209054	211862	215754	1.03911	1.01065	1.02266	1.03469	1.03138	1.00874	1.73248	0.968947	0.981961
C04071	2.01082e+06	1.95772e+06	1.94002e+06	2.11438e+06	2.07952e+06	2.04869e+06	2.00851e+06	2.00558e+06	2.00434e+06	1.99596e+06	2.01145e+06	2.03808e+06	1.98726e+06	1.06396	1.04642	1.03091	1.01069	1.00922	1.00859	1.00438	1.01217	1.02557
C04084	1.70319e+06	1.48138e+06	1.48829e+06	1.63599e+06	1.6941e+06	1.57383e+06	1.71866e+06	1.60649e+06	1.61371e+06	1.70233e+06	1.74323e+06	1.79524e+06	1.55689e+06	1.0508	1.08813	1.01088	1.10391	1.03186	1.03649	1.09342	1.11968	1.15309
C04100	2.59176e+06	884889	813353	2.25106e+06	2.43396e+06	2.68785e+06	2.18336e+06	2.54871e+06	2.07591e+06	2.31376e+06	2.39701e+06	2.48598e+06	1.6828e+06	1.33769	1.44638	1.59725	1.29746	1.51457	1.23361	1.37495	1.42442	1.47729
C04102	640681	654494	651392	1.66668e+06	637620	592792	1.45887e+06	1.63002e+06	1.28957e+06	1.43188e+06	1.42102e+06	1.42275e+06	873695	1.90763	0.729797	0.678489	1.66977	1.86566	1.476	1.63888	1.62645	1.62843
C04104	3.77707e+06	2.5859e+06	2.50359e+06	2.89873e+06	3.65567e+06	3.57902e+06	2.80103e+06	3.20073e+06	2.67457e+06	2.7248e+06	2.69008e+06	2.79017e+06	2.86746e+06	1.01091	1.27488	1.24815	0.976834	1.11623	0.932732	0.95025	0.938139	0.973044
C04114	541009	484137	504042	511877	548867	525716	536252	499675	534942	513863	534033	529694	511722	1.0003	1.07259	1.02735	1.04794	0.976459	1.04538	1.00418	1.0436	1.03512
C04122	4.88255e+07	177142	169172	268147	2.86009e+07	470034	1.33532e+08	1.14823e+08	241117	247389	3.644e+07	3.8955e+07	1.23635e+07	0.0216885	2.31333	0.0380178	10.8005	9.28727	0.0195023	0.0200096	2.94738	3.1508
C04144	2.1352e+06	2.11685e+06	2.13806e+06	2.2009e+06	2.15276e+06	2.15501e+06	2.21083e+06	2.12845e+06	2.1719e+06	2.17946e+06	2.23429e+06	2.18412e+06	2.13368e+06	1.03151	1.00895	1.01	1.03616	0.997549	1.01792	1.02146	1.04715	1.02364
C04152	2.2708e+08	9.89534e+07	1.15171e+08	1.76594e+08	1.38617e+08	9.16144e+07	2.11624e+08	2.15542e+08	2.02501e+08	2.29057e+08	2.12894e+08	2.31432e+08	1.58948e+08	1.11101	0.872088	0.576378	1.3314	1.35605	1.274	1.44108	1.33939	1.45602
C04164	215266	172139	178063	191844	262778	183734	171054	228288	179539	182696	188172	188646	184185	1.04158	1.42671	0.997551	0.928709	1.23945	0.974772	0.991915	1.02165	1.02422
C04166	467585	499534	528687	565367	472064	478778	536328	600607	563502	528151	533576	547433	508993	1.11076	0.927446	0.940638	1.0537	1.17999	1.10709	1.03764	1.0483	1.07552
C04167	3.77643e+07	184512	192605	253243	4.16431e+07	4.38897e+07	4.11455e+06	1.59717e+06	210759	227413	5.87345e+06	5.34023e+06	9.59825e+06	0.0263843	4.33861	4.57268	0.428677	0.166402	0.021958	0.0236932	0.611929	0.556376
C04181	316437	321380	334815	332010	319404	296465	348725	288070	327818	335704	302690	308183	322571	1.02926	0.990183	0.919069	1.08108	0.893045	1.01627	1.04071	0.938367	0.955397
C04185	452791	265332	235735	359451	643264	658418	333699	339080	336199	335796	376238	359115	351594	1.02235	1.82956	1.87267	0.949103	0.964408	0.956213	0.955069	1.07009	1.02139
C04197	304658	251323	252005	271509	412728	273692	284012	350562	269194	258562	296974	275522	262595	1.03395	1.57173	1.04226	1.08156	1.33499	1.02513	0.984642	1.13092	1.04923
C04210	490085	315003	287309	402629	492825	462406	358043	423000	363915	337455	344772	359100	363363	1.10806	1.35629	1.27257	0.985361	1.16413	1.00152	0.928698	0.948836	0.988269
C04216	449264	426023	427348	590073	455089	452773	592490	448777	518507	456849	487742	556760	467441	1.26235	0.973576	0.968622	1.26752	0.960073	1.10925	0.977341	1.04343	1.19108
C04236	398703	820525	1.14488e+06	2.3035e+06	1.99925e+06	322409	2.68297e+06	1.30622e+06	390867	317814	330784	676583	845757	2.72359	2.36385	0.381208	3.17226	1.54444	0.46215	0.375775	0.39111	0.799973
C04251	749942	681162	714958	720526	738650	720906	748240	828674	752495	728742	745526	711323	712185	1.01171	1.03716	1.01224	1.05063	1.16357	1.0566	1.02325	1.04681	0.998789
C04275	2.64188e+07	2.21118e+06	2.23136e+06	2.47215e+07	2.58836e+07	2.41744e+07	3.05413e+07	3.28971e+07	2.51853e+07	2.57513e+07	2.88235e+07	2.4146e+07	1.60936e+07	1.5361	1.60832	1.50211	1.89773	2.04411	1.56493	1.6001	1.79099	1.50035
C04277	1.09551e+06	1.02682e+06	1.02454e+06	1.16507e+06	1.09419e+06	1.07977e+06	1.1383e+06	1.05138e+06	1.08204e+06	1.11278e+06	1.09059e+06	1.03462e+06	1.03514e+06	1.12552	1.05704	1.04311	1.09966	1.01569	1.0453	1.075	1.05357	0.9995
C04282	699085	625831	617672	655888	674171	686028	639037	699364	617376	607447	666550	622601	654029	1.00284	1.0308	1.04893	0.977076	1.06932	0.943958	0.928776	1.01914	0.951946
C04297	246406	190146	171031	199792	216791	228900	209672	222181	197992	194763	199550	196745	202915	0.98461	1.06839	1.12806	1.0333	1.09495	0.97574	0.959825	0.98342	0.969594
C04302	85675.6	78305.2	74986.4	119227	91125.1	86817.8	104123	112767	85148.5	105908	103531	138573	81844.9	1.45675	1.11339	1.06076	1.2722	1.37781	1.04036	1.29401	1.26497	1.69312
C04308	6.5837e+07	5.08797e+07	5.00034e+07	6.60096e+07	2.7445e+08	9.25054e+07	5.55686e+07	9.58097e+07	5.58736e+07	4.54242e+07	4.35997e+07	4.37682e+07	5.47669e+07	1.20528	5.01123	1.68907	1.01464	1.74941	1.02021	0.829409	0.796095	0.799172
C04411	283575	165269	165642	215164	269767	238731	194747	244250	198076	210163	198356	208289	202816	1.06088	1.33011	1.17708	0.960217	1.20429	0.97663	1.03622	0.978009	1.02699
C04421	508814	483571	431632	515400	492229	480050	459557	408058	364516	463530	464779	474026	465631	1.10688	1.05712	1.03097	0.986955	0.876355	0.782842	0.995486	0.998169	1.01803
C04446	108811	107543	106062	111488	110401	112071	110701	108839	112733	105566	105702	104163	107963	1.03265	1.02258	1.03805	1.02536	1.00811	1.04418	0.977798	0.97906	0.964805
C04454	472224	498189	486462	519514	461883	444866	490369	533056	536182	493545	514088	499244	500864	1.03724	0.922173	0.888198	0.979048	1.06427	1.07051	0.985387	1.0264	0.996767
C04483	584008	1.31722e+07	5.78617e+06	1.63006e+10	6.30002e+06	4.77241e+06	1.64589e+10	1.88733e+10	1.01704e+10	1.86095e+10	1.9366e+10	2.03201e+10	4.30612e+09	3.78544	0.00146304	0.00110828	3.82221	4.38289	2.36185	4.32163	4.49731	4.7189
C04485	220427	206771	205812	216961	241282	234543	213320	211855	207581	213920	212427	223329	209814	1.03407	1.14998	1.11786	1.01671	1.00973	0.989358	1.01957	1.01246	1.06442
C04487	1.3625e+06	1.02955e+06	1.02349e+06	1.07351e+06	1.22407e+06	1.33015e+06	1.04755e+06	1.16638e+06	1.02765e+06	1.01618e+06	1.04483e+06	1.05839e+06	1.11901e+06	0.959342	1.09389	1.18869	0.936141	1.04233	0.918355	0.908104	0.933715	0.945828
C04500	388445	347926	341404	1.09514e+06	415683	403690	502745	1.02615e+06	629624	942988	992207	1.17779e+06	377749	2.89912	1.10042	1.06867	1.3309	2.7165	1.66678	2.49634	2.62663	3.11791
C04521	442425	420878	420887	479816	455419	433834	459570	486636	433020	465409	457666	468627	424853	1.12937	1.07194	1.02114	1.08171	1.14542	1.01922	1.09546	1.07723	1.10303
C04529	458413	345195	323002	367916	327216	4.13087e+06	1.86372e+06	299447	536387	535142	435044	427316	859133	0.428241	0.380868	4.80819	2.1693	0.348545	0.624335	0.622886	0.506375	0.49738
C04534	201759	209592	197769	191876	204756	191892	200155	226693	195192	212788	209453	203672	199231	0.963087	1.02773	0.963164	1.00464	1.13784	0.979729	1.06805	1.05131	1.02229
C04544	495081	470798	489832	480592	502110	464233	464023	470265	460816	478885	452719	457895	470282	1.02192	1.06768	0.987138	0.98669	0.999962	0.979872	1.01829	0.962654	0.973659
C04546	376260	274330	272244	352848	386365	370638	365549	358989	298829	343083	358298	345691	313363	1.126	1.23296	1.18278	1.16654	1.1456	0.95362	1.09484	1.14339	1.10316
C04556	2.00333e+07	482886	450155	747260	952193	5.29748e+06	6.29476e+06	5.35442e+06	589412	703984	6.95296e+06	4.58973e+06	5.49388e+06	0.136017	0.173319	0.964251	1.14578	0.974615	0.107285	0.12814	1.26558	0.835426
C04584	5.63884e+08	5.59359e+08	5.45963e+08	6.0407e+08	5.79676e+08	5.8125e+08	5.74212e+08	5.33832e+08	5.40174e+08	5.46953e+08	5.4873e+08	5.65474e+08	5.5691e+08	1.08468	1.04088	1.0437	1.03107	0.95856	0.969948	0.982121	0.985312	1.01538
C04586	90617.6	89842	89912.5	91015.2	92954.6	91249.3	95098.8	93657.9	92742.8	90714.3	89035.8	88187	89471.2	1.01726	1.03893	1.01987	1.0629	1.04679	1.03657	1.01389	0.995134	0.985647
C04594	136518	72567.9	64935.8	99054	124127	114404	90056.7	118060	97784.1	101987	100324	100640	93715.8	1.05696	1.3245	1.22076	0.960955	1.25976	1.04341	1.08826	1.07051	1.07388
C04596	277428	385414	375869	388273	314150	296784	286875	291667	415051	347639	296823	288990	351653	1.10414	0.89335	0.843966	0.815789	0.829417	1.18028	0.988583	0.844077	0.821803
C04597	216502	211818	205654	223949	219952	222457	214112	209121	216371	216156	215390	207702	211768	1.05752	1.03865	1.05048	1.01107	0.9875	1.02174	1.02072	1.0171	0.980798
C04638	1.2343e+06	995720	899260	1.00476e+06	1.18256e+06	1.12919e+06	1.06511e+06	1.12294e+06	1.03571e+06	987675	983037	998008	1.03513e+06	0.970654	1.14242	1.09087	1.02895	1.08482	1.00056	0.954151	0.94967	0.964134
C04663	5.58675e+07	249419	243595	269453	1.48941e+08	1.68074e+06	2.39261e+07	1.04012e+08	267155	259560	3.03724e+07	2.0317e+07	1.41515e+07	0.0190405	10.5247	0.118768	1.69071	7.34989	0.0188782	0.0183415	2.14623	1.43568
C04670	59497.6	41235.3	38114.2	47868.3	56829	53258.1	49877.3	48761.8	47674.7	39367.6	39703.8	44772.3	46206.4	1.03597	1.22989	1.15261	1.07945	1.0553	1.03178	0.851993	0.859269	0.968962
C04671	1.6202e+06	1.53077e+06	1.55429e+06	1.48999e+06	1.56775e+06	1.4238e+06	1.50145e+06	1.8378e+06	1.34432e+06	1.59748e+06	1.6182e+06	1.48213e+06	1.54007e+06	0.967486	1.01797	0.924505	0.974923	1.19332	0.872894	1.03728	1.05073	0.962381
C04672	447256	525262	424039	1.02603e+06	497381	448829	513500	3.91314e+06	500819	2.82546e+06	2.74606e+06	2.65035e+06	495540	2.07053	1.00372	0.905737	1.03624	7.89671	1.01065	5.70177	5.54155	5.34842
C04687	543749	390930	355130	457079	572530	536310	451560	510944	452319	409224	421535	440162	430822	1.06095	1.32892	1.24485	1.04814	1.18597	1.0499	0.949869	0.978445	1.02168
C04690	268259	174980	187728	246847	285487	271860	217504	202608	200285	221669	234855	256089	219042	1.12694	1.30335	1.24113	0.99298	0.924972	0.91437	1.012	1.07219	1.16913
C04692	787383	784444	780868	827137	809974	793215	766173	826129	830176	854711	793451	804287	789451	1.04774	1.026	1.00477	0.970513	1.04646	1.05159	1.08267	1.00507	1.01879
C04695	2.17459e+06	1.88302e+06	1.94224e+06	1.85933e+06	2.05581e+06	1.96165e+06	1.8214e+06	1.83813e+06	1.80449e+06	1.78681e+06	1.85396e+06	1.88246e+06	1.948e+06	0.954483	1.05535	1.00701	0.935011	0.9436	0.92633	0.917256	0.951723	0.966353
C04751	1.40468e+08	524692	461264	4.18291e+07	1.59394e+08	6.28967e+07	5.12938e+07	1.00929e+08	1.67282e+06	4.62389e+07	4.62765e+07	3.93086e+07	3.70323e+07	1.12953	4.30419	1.69843	1.38511	2.72542	0.045172	1.24861	1.24962	1.06147
C04771	325653	271349	275239	300201	342859	341595	279829	270865	254692	285339	279581	321122	284084	1.05673	1.20689	1.20244	0.985023	0.953468	0.896539	1.00442	0.984148	1.13038
C04796	305556	304645	299160	315035	321602	309746	317039	309391	316497	298182	305315	302534	304734	1.0338	1.05535	1.01645	1.04038	1.01528	1.0386	0.978499	1.00191	0.99278
C04831	226907	31061.1	31645.3	54784.4	250428	226397	65339.3	69466.9	54984.4	49109.7	55422	75511.8	86164.9	0.635809	2.90638	2.62748	0.758305	0.806209	0.63813	0.569951	0.643209	0.876364
C04834	696544	652872	651420	740772	695705	686537	723753	668487	679627	707524	693418	657833	658163	1.12552	1.05704	1.04311	1.09966	1.01569	1.03261	1.075	1.05357	0.9995
C04849	640474	597951	571139	615570	605132	603298	611153	672272	603713	605438	614827	596906	605305	1.01696	0.999714	0.996684	1.00966	1.11063	0.997368	1.00022	1.01573	0.986123
C04864	360719	401192	396740	399598	373103	397041	377572	373239	386952	396249	379796	389894	383018	1.04329	0.974112	1.03661	0.985779	0.974466	1.01027	1.03454	0.991587	1.01795
C04883	1.73676e+06	2.05417e+06	1.98769e+06	2.1092e+06	1.77582e+06	1.76394e+06	1.95866e+06	1.88108e+06	2.02038e+06	2.00788e+06	2.03562e+06	1.99173e+06	1.92509e+06	1.09563	0.922458	0.916289	1.01744	0.977139	1.0495	1.043	1.05742	1.03462
C04908	344250	344618	341723	1.83104e+06	358573	391841	1.64235e+06	3.22143e+06	1.34609e+06	2.04513e+06	2.02283e+06	2.54702e+06	793836	2.30658	0.451696	0.493604	2.06887	4.05805	1.69568	2.57626	2.54817	3.2085
C05021	181923	130443	119810	156348	168891	181294	154460	174773	154719	139979	138818	134688	144561	1.08154	1.16831	1.2541	1.06848	1.20899	1.07027	0.968303	0.960274	0.931704
C05122	444936	491407	543618	548201	497434	472467	514386	483865	507622	506107	502574	535046	503764	1.08821	0.987436	0.937874	1.02109	0.960501	1.00766	1.00465	0.997638	1.0621
C05130	480470	325646	325469	499887	491508	546381	466397	486071	464590	427361	489473	473071	405314	1.23333	1.21266	1.34804	1.15071	1.19925	1.14625	1.0544	1.20764	1.16717
C05131	135325	140125	134966	142490	147263	142471	139637	142308	145576	137152	139853	139153	138421	1.02939	1.06388	1.02925	1.00878	1.02808	1.05169	0.990829	1.01034	1.00529
C05143	1.11017e+06	1.21761e+06	1.17494e+06	1.20185e+06	1.25091e+06	1.18262e+06	1.07084e+06	1.07232e+06	981065	1.05514e+06	1.12768e+06	1.1719e+06	1.1339e+06	1.05993	1.10319	1.04297	0.944393	0.94569	0.865214	0.930546	0.994512	1.03352
C05146	485584	457096	441681	518638	487085	439339	506722	468029	492988	495359	466408	460569	453537	1.14354	1.07397	0.968695	1.11727	1.03195	1.08699	1.09221	1.02838	1.01551
C05158	1.69133e+06	1.4762e+06	1.48734e+06	1.56959e+06	1.68818e+06	1.54108e+06	1.55657e+06	1.7239e+06	1.56543e+06	1.52944e+06	1.55093e+06	1.66618e+06	1.52917e+06	1.02643	1.10399	1.00779	1.01792	1.12735	1.02371	1.00018	1.01423	1.0896
C05177	1.40936e+07	1.08855e+06	1.11097e+06	2.58592e+06	1.38081e+07	1.28963e+07	2.433e+06	3.57174e+06	1.90853e+06	2.40313e+06	2.39279e+06	2.74738e+06	4.64756e+06	0.556404	2.97105	2.77485	0.523501	0.768518	0.410653	0.517073	0.514848	0.591144
C05183	444121	346701	355923	510645	474748	470994	472325	521201	405943	497597	473036	607488	395043	1.29263	1.20176	1.19226	1.19563	1.31935	1.02759	1.2596	1.19743	1.53778
C05189	1.43032e+06	1.32872e+06	1.34122e+06	2.20127e+08	1.43441e+06	1.51079e+06	1.14513e+08	1.60584e+08	1.05622e+08	8.17441e+07	1.78517e+08	2.27259e+08	1.86299e+07	11.8158	0.0769951	0.0810949	6.14676	8.61969	5.66947	4.3878	9.58229	12.1986
C05193	1.41729e+06	1.14333e+06	1.02804e+06	1.15371e+06	1.35787e+06	1.27955e+06	1.223e+06	1.26598e+06	1.18925e+06	1.13409e+06	1.13598e+06	1.14596e+06	1.1845e+06	0.974008	1.14637	1.08025	1.03251	1.06879	1.00401	0.957449	0.959042	0.967465
C05203	277817	206998	203250	212054	263944	245397	233209	229091	204245	209606	241161	260932	222838	0.951605	1.18447	1.10123	1.04654	1.02806	0.916564	0.94062	1.08222	1.17095
C05230	259237	272629	282639	278442	251665	250533	267535	274510	272598	272495	267856	266294	271572	1.0253	0.926697	0.922526	0.985132	1.01082	1.00378	1.0034	0.986317	0.980564
C05239	2.86597e+06	1.80054e+06	1.89814e+06	2.17721e+06	2.81944e+06	2.72657e+06	2.25224e+06	2.52666e+06	2.03715e+06	2.06586e+06	2.14449e+06	2.21329e+06	2.14827e+06	1.01347	1.31242	1.26919	1.04839	1.17613	0.948272	0.961639	0.998238	1.03027
C05243	88228.2	77216.6	77308.7	79604.8	86233	79718.8	75116.3	73115.9	73983.4	79478	78226.5	79169.7	78163.4	1.01844	1.10324	1.0199	0.961017	0.935424	0.946523	1.01682	1.00081	1.01287
C05252	336361	268470	294047	303485	328755	303920	301363	286296	282054	303001	311548	318916	291398	1.04148	1.1282	1.04297	1.0342	0.982491	0.967935	1.03982	1.06915	1.09443
C05270	180184	144652	132371	173001	157451	187870	165639	199690	131281	153666	169910	168099	151354	1.14303	1.04029	1.24127	1.09439	1.31936	0.86738	1.01528	1.1226	1.11064
C05282	3.51012e+06	2.04131e+06	2.03777e+06	4.5678e+06	2.62807e+06	2.05139e+06	9.9047e+06	1.58839e+07	8.89413e+06	6.49611e+06	3.75482e+06	2.22472e+06	3.52229e+06	1.29683	0.746125	0.582401	2.812	4.50952	2.52509	1.84428	1.06602	0.63161
C05293	223906	227721	217685	232870	233533	220710	231491	227149	233386	220673	242377	223855	224757	1.0361	1.03904	0.981991	1.02996	1.01064	1.03839	0.981828	1.07839	0.995984
C05315	2.76521e+06	3.00811e+06	3.02697e+06	3.14938e+06	2.82985e+06	2.76932e+06	2.97751e+06	3.20602e+06	3.13973e+06	3.11534e+06	3.02091e+06	2.99977e+06	2.98536e+06	1.05494	0.947909	0.927631	0.99737	1.07391	1.05171	1.04354	1.01191	1.00483
C05322	1.35536e+06	1.26008e+06	1.30965e+06	1.21723e+07	1.31148e+06	1.19107e+06	1.622e+07	8.28143e+06	1.44229e+07	4.2031e+06	1.93901e+07	1.72623e+07	6.22149e+06	1.9565	0.210799	0.191444	2.6071	1.3311	2.31823	0.675578	3.11664	2.77463
C05328	3.25033e+06	2.22083e+06	2.15143e+06	2.57747e+06	3.19845e+06	3.1129e+06	2.54792e+06	4.11012e+06	2.43249e+06	2.29045e+06	2.37424e+06	2.47307e+06	2.50118e+06	1.0305	1.27878	1.24457	1.01869	1.64327	0.97254	0.915749	0.949248	0.988762
C05332	2.34646e+09	2.60851e+09	2.57893e+09	2.07846e+09	2.03693e+09	2.12068e+09	2.43353e+09	2.38086e+09	2.43956e+09	2.43468e+09	2.44232e+09	2.41459e+09	2.51009e+09	0.828045	0.811498	0.844864	0.969499	0.948517	0.971903	0.969958	0.973002	0.961957
C05340	741612	728789	735468	712964	783222	708206	784971	869354	789435	764516	752428	727644	730471	0.976033	1.07221	0.969519	1.07461	1.19013	1.08072	1.04661	1.03006	0.99613
C05345	1.54916e+06	1.45836e+06	1.45718e+06	1.58798e+06	1.53409e+06	1.57435e+06	1.45912e+06	1.49768e+06	1.48469e+06	1.52918e+06	1.51964e+06	1.4898e+06	1.48224e+06	1.07134	1.03498	1.06215	0.984406	1.01042	1.00166	1.03167	1.02523	1.00511
C05349	462015	528773	554397	579909	501209	479213	565506	576258	553690	686879	566737	561274	528958	1.09632	0.947541	0.905958	1.06909	1.08942	1.04676	1.29855	1.07142	1.06109
C05350	1.79579e+07	4.27118e+07	6.86819e+06	4.73982e+07	7.97222e+06	3.65794e+06	1.75841e+07	8.64941e+06	1.54005e+07	3.70863e+06	4.81459e+07	1.60505e+07	2.69692e+07	1.75749	0.295604	0.135634	0.652005	0.320714	0.571041	0.137513	1.78521	0.595142
C05366	1.80738e+06	828117	735744	1.20205e+06	2.05796e+06	2.05496e+06	1.04149e+06	1.2811e+06	1.0493e+06	1.15717e+06	1.19181e+06	1.23788e+06	1.15399e+06	1.04165	1.78335	1.78075	0.90252	1.11015	0.909281	1.00276	1.03278	1.0727
C05377	1.08466e+06	450589	430315	721383	1.23504e+06	1.19561e+06	605141	768822	806750	694453	715239	742886	670924	1.07521	1.84081	1.78203	0.901952	1.14592	1.20245	1.03507	1.06605	1.10726
C05381	325675	307160	307219	2.92677e+06	325151	333453	912469	5.37411e+06	1.26375e+06	1.97771e+06	2.25286e+06	4.4196e+06	1.00628e+06	2.90852	0.323122	0.331373	0.906777	5.34058	1.25586	1.96538	2.2388	4.39203
C05382	608851	488079	496075	511997	573594	512730	549882	540172	481589	511181	553636	615251	516682	0.990934	1.11015	0.992352	1.06426	1.04546	0.932081	0.989355	1.07152	1.19077
C05403	1.57887e+06	1.71756e+06	1.72833e+06	1.76741e+06	1.61578e+06	1.61983e+06	1.70705e+06	1.78226e+06	1.79271e+06	1.71521e+06	1.7583e+06	1.73653e+06	1.70457e+06	1.03687	0.947909	0.950286	1.00146	1.04558	1.05171	1.00624	1.03152	1.01875
C05421	346326	203087	184431	263096	325509	316377	251287	305324	244292	238614	256325	249624	246248	1.06842	1.32187	1.28479	1.02046	1.2399	0.992055	0.968998	1.04092	1.01371
C05427	3.31772e+06	732269	749220	1.10575e+06	2.95797e+06	2.87796e+06	1.12122e+06	1.30201e+06	978563	1.16398e+06	1.26704e+06	1.15191e+06	1.50106e+06	0.736646	1.97058	1.91728	0.746952	0.867389	0.651913	0.77544	0.844094	0.767398
C05430	158189	47843.8	44213.9	130111	182133	170324	143236	132404	133726	143716	153340	167178	101415	1.28295	1.79592	1.67947	1.41237	1.30557	1.3186	1.4171	1.512	1.64845
C05452	404422	266932	237523	317649	396035	397398	307242	351521	286779	269971	282669	289855	299431	1.06084	1.32263	1.32718	1.02609	1.17397	0.957746	0.901615	0.944021	0.968021
C05464	1.07546e+06	1.08818e+06	1.09751e+06	1.12639e+06	1.09144e+06	1.08998e+06	1.15729e+06	1.20837e+06	1.10932e+06	1.13425e+06	1.14101e+06	1.12389e+06	1.08075e+06	1.04224	1.00989	1.00854	1.07082	1.11809	1.02644	1.04951	1.05576	1.03992
C05465	457032	405812	390355	597686	460823	478052	538554	620563	498213	530917	568326	694667	441427	1.35399	1.04394	1.08297	1.22003	1.40581	1.12864	1.20273	1.28747	1.57369
C05468	3.9356e+06	2.29878e+06	2.29009e+06	3.27257e+06	3.56219e+06	3.47853e+06	2.91867e+06	3.27228e+06	2.80083e+06	3.01963e+06	3.10877e+06	3.15147e+06	2.85961e+06	1.14441	1.24569	1.21643	1.02065	1.14431	0.979443	1.05596	1.08713	1.10206
C05504	469147	430364	477422	1.28988e+06	489241	449930	1.22333e+06	1.28491e+06	1.18083e+06	1.1837e+06	1.22516e+06	1.19513e+06	674829	1.91142	0.724984	0.666732	1.8128	1.90405	1.74982	1.75408	1.8155	1.77101
C05513	968997	6.76357e+06	7.77648e+06	644460	1.15203e+06	3.35583e+07	540613	686840	547918	569959	638971	663670	3.42165e+06	0.188348	0.336688	9.80764	0.157998	0.200734	0.160133	0.166574	0.186744	0.193962
C05539	314555	305284	314928	336152	344004	306378	347124	310600	302256	333119	320797	321000	309806	1.08504	1.11038	0.988935	1.12045	1.00256	0.97563	1.07525	1.03548	1.03613
C05554	2.72834e+07	2.28354e+06	2.21416e+06	2.0874e+07	2.67307e+07	2.49656e+07	2.66044e+07	2.51492e+07	2.2925e+07	2.4521e+07	2.69649e+07	2.31136e+07	1.60656e+07	1.29929	1.66385	1.55398	1.65598	1.56541	1.42696	1.5263	1.67842	1.4387
C05557	407800	328670	295425	443861	452809	452126	419885	407016	361696	399718	417644	434580	358702	1.23741	1.26235	1.26045	1.17057	1.13469	1.00835	1.11434	1.16432	1.21153
C05562	5.18644e+06	4.61438e+07	4.7513e+07	3.49549e+07	3.62713e+07	3.62057e+07	4.1654e+07	3.76533e+07	3.95622e+07	3.0239e+07	2.9999e+07	2.94731e+07	3.26362e+07	1.07105	1.11138	1.10937	1.27631	1.15373	1.21222	0.926546	0.919195	0.903079
C05594	78208.9	59582.2	62429.6	78889.2	84396.9	76266.1	73309	82429.3	69229.8	71690.5	70065.5	73375.6	67552.3	1.16782	1.24936	1.12899	1.08522	1.22023	1.02483	1.06126	1.0372	1.08621
C05595	420049	276568	257822	427985	504625	446281	330729	323059	331767	402085	347173	398504	339806	1.2595	1.48504	1.31334	0.973288	0.950716	0.976342	1.18328	1.02168	1.17274
C05596	432472	335487	352113	428399	437891	443422	411127	437246	403408	395737	417911	406303	382219	1.12082	1.14566	1.16013	1.07563	1.14397	1.05544	1.03537	1.09338	1.06301
C05601	1.51449e+08	1.74267e+06	1.75631e+06	4.67548e+07	1.59394e+08	1.70414e+08	5.12938e+07	1.00929e+08	2.75863e+07	5.01835e+07	7.35562e+07	3.93086e+07	4.59593e+07	1.01731	3.46815	3.70793	1.11607	2.19604	0.600234	1.09191	1.60046	0.855291
C05613	1.9896e+06	1.79941e+06	1.81825e+06	1.79228e+06	1.97177e+06	1.76556e+06	1.72472e+06	1.77287e+06	1.79292e+06	1.71377e+06	1.77816e+06	1.8055e+06	1.83811e+06	0.975066	1.07271	0.960528	0.938308	0.964507	0.975413	0.932351	0.967386	0.982256
C05619	581900	458005	465459	566300	616556	589776	543469	577995	533265	523125	570665	537434	514032	1.10168	1.19945	1.14735	1.05727	1.12444	1.03742	1.01769	1.11018	1.04553
C05635	378042	353984	320697	333606	365720	356671	341445	300740	305515	344397	345325	352195	340415	0.979996	1.07434	1.04775	1.00303	0.883449	0.897476	1.0117	1.01442	1.0346
C05643	1.16917e+07	135814	155074	2.59288e+07	1.15077e+07	7.21753e+06	2.06542e+07	3.08953e+07	1.381e+07	2.76574e+06	3.09289e+07	1.11375e+06	6.84803e+06	3.78631	1.68044	1.05396	3.01608	4.51157	2.01663	0.403874	4.51647	0.162638
C05643	118259	83971.6	85369.9	93214.1	115654	103166	100879	127883	91582.6	89357.5	94923.7	101548	94203.7	0.989494	1.2277	1.09514	1.07086	1.35752	0.972176	0.948556	1.00764	1.07796
C05648	118077	97405.5	93155.2	105229	159962	106075	106937	135868	98479.5	100211	106419	106785	101022	1.04165	1.58343	1.05002	1.05855	1.34493	0.974832	0.991976	1.05342	1.05704
C05670	470807	357329	322688	489833	506567	535392	457017	476295	423063	431088	479628	477828	404873	1.20984	1.25118	1.32237	1.12879	1.17641	1.04493	1.06475	1.18464	1.18019
C05683	455487	480626	472470	552625	514297	531776	491224	551455	514001	533679	508367	535000	476152	1.16061	1.08011	1.11682	1.03165	1.15815	1.07949	1.12082	1.06766	1.12359
C05730	532222	535906	537807	1.37441e+06	535603	570157	1.1114e+06	2.16365e+06	1.16941e+06	1.01462e+06	1.096e+06	1.34844e+06	800558	1.71681	0.669037	0.712199	1.38828	2.70268	1.46074	1.2674	1.36905	1.68437
C05771	458657	268770	238789	364108	651598	666948	338022	343473	340555	340147	381112	363767	340463	1.06945	1.91386	1.95895	0.992832	1.00884	1.00027	0.999073	1.1194	1.06845
C05775	294617	235592	243700	262561	1.44036e+06	251461	243651	1.00355e+06	245719	250040	265528	266441	252079	1.04158	5.71391	0.997551	0.966566	3.9811	0.974772	0.991915	1.05335	1.05698
C05786	243352	268645	255860	264502	242213	252206	287030	292425	289436	289667	271126	248608	260525	1.01527	0.929713	0.968068	1.10174	1.12245	1.11097	1.11186	1.04069	0.95426
C05790	2.98034e+06	993752	891745	3.06095e+06	3.26057e+06	3.10654e+06	3.01005e+06	3.2686e+06	2.60666e+06	2.97306e+06	2.89141e+06	3.3323e+06	2.04859e+06	1.49418	1.59162	1.51643	1.46933	1.59554	1.27242	1.45127	1.41142	1.62663
C05819	453976	470222	475283	491644	491093	489111	525428	466439	471707	494065	485116	488531	464738	1.0579	1.05671	1.05245	1.13059	1.00366	1.015	1.0631	1.04385	1.0512
C05844	2.81552e+06	2.86994e+06	2.81886e+06	2.91858e+06	2.83868e+06	2.84164e+06	2.88556e+06	2.8413e+06	2.8369e+06	2.87388e+06	2.94618e+06	2.84518e+06	2.83043e+06	1.03115	1.00292	1.00396	1.01948	1.00384	1.00229	1.01535	1.0409	1.00521
C05849	462351	278244	283733	349899	388192	381681	336566	360185	309980	336537	326304	355572	337690	1.03615	1.14955	1.13027	0.996671	1.06661	0.91794	0.996585	0.966283	1.05295
C05851	401176	264141	246238	408756	481952	426229	315869	308544	316860	384019	331574	380599	323503	1.26353	1.48979	1.31755	0.976403	0.953759	0.979467	1.18707	1.02495	1.1765
C05853	1.57032e+06	471901	446907	1.24312e+06	1.53036e+06	1.45577e+06	1.16234e+06	1.38731e+06	1.18133e+06	1.32183e+06	1.30244e+06	1.37723e+06	982519	1.26524	1.55759	1.48167	1.18302	1.41199	1.20235	1.34535	1.32561	1.40174
C05909	485318	424746	425253	437883	474343	438510	434822	413082	406962	437186	449517	460147	429954	1.01844	1.10324	1.0199	1.01132	0.960757	0.946523	1.01682	1.0455	1.07022
C05913	433327	443801	438795	511921	456743	426610	486866	504378	463365	497863	494120	483114	451077	1.13489	1.01256	0.945758	1.07934	1.11816	1.02724	1.10372	1.09542	1.07102
C05942	365934	196497	198144	277992	359993	334289	268256	322611	258123	260280	270838	268108	256213	1.085	1.40505	1.30473	1.047	1.25915	1.00745	1.01587	1.05708	1.04642
C05944	1.19969e+06	729050	732586	1.1282e+06	1.4376e+06	1.51207e+06	871822	851603	889880	1.05992e+06	916433	1.05048e+06	973958	1.15836	1.47604	1.5525	0.895133	0.874373	0.913673	1.08826	0.940936	1.07857
C05945	256427	285241	280716	290378	277630	275874	284365	267925	270731	276659	270423	270614	273532	1.06158	1.01498	1.00856	1.0396	0.979501	0.989759	1.01143	0.988632	0.989333
C06002	486842	285285	254831	386482	691638	707932	358794	364579	704301	387877	404532	386121	361612	1.06878	1.91265	1.95771	0.992206	1.00821	1.94767	1.07263	1.11869	1.06778
C06044	4.30361e+06	6.00246e+06	4.98118e+06	3.25482e+07	5.2351e+06	5.96384e+06	2.6434e+07	1.42284e+08	1.99884e+07	2.56056e+07	3.01605e+07	3.25982e+07	1.02986e+07	3.16044	0.508329	0.579089	2.56674	13.8158	1.94087	2.4863	2.92858	3.16529
C06055	8.41023e+06	8.2369e+06	8.33835e+06	8.07518e+06	8.40784e+06	8.49597e+06	8.19684e+06	8.21307e+06	8.24419e+06	8.29192e+06	8.83805e+06	8.52869e+06	8.34301e+06	0.967898	1.00777	1.01833	0.982481	0.984426	0.988156	0.993877	1.05934	1.02226
C06080	901860	727535	654169	734139	864049	814216	760663	763717	756755	721657	706522	712318	748010	0.981456	1.15513	1.08851	1.01692	1.021	1.01169	0.96477	0.944536	0.952285
C06082	284761	233394	217433	351713	630286	416433	345467	454879	293093	359478	357024	416700	267415	1.31523	2.35696	1.55726	1.29188	1.70102	1.09602	1.34427	1.33509	1.55825
C06087	1.27797e+06	378698	374317	1.00049e+06	1.29676e+06	1.39769e+06	1.28775e+06	1.42822e+06	1.17778e+06	1.49278e+06	1.48923e+06	1.48089e+06	902752	1.10826	1.43645	1.54825	1.42647	1.58208	1.30465	1.65359	1.64966	1.64042
C06145	1.74485e+07	1.32563e+06	579685	4.90023e+06	1.75491e+07	1.44482e+07	1.87797e+06	8.84107e+06	6.34219e+06	8.10545e+06	2.49679e+06	1.18251e+06	6.01726e+06	0.814363	2.91647	2.40112	0.312097	1.46928	1.054	1.34703	0.414938	0.196519
C06157	421298	267406	275755	305493	425779	353096	321993	419779	298696	301404	329596	347592	312361	0.978013	1.3631	1.13041	1.03084	1.34389	0.95625	0.964922	1.05517	1.11279
C06173	592430	651654	621843	1.57579e+06	585089	579295	1.41824e+06	1.47032e+06	1.24687e+06	1.39678e+06	1.40367e+06	1.48088e+06	827526	1.90422	0.707034	0.700032	1.71383	1.77676	1.50675	1.6879	1.69622	1.78953
C06178	3.41973e+06	3.55112e+06	3.56982e+06	3.91685e+06	3.44867e+06	1.00265e+07	3.71813e+06	3.15091e+06	3.55169e+06	3.5793e+06	3.44778e+06	3.47311e+06	3.52024e+06	1.11266	0.97967	2.84826	1.05621	0.895084	1.00893	1.01678	0.979417	0.98661
C06195	242068	190348	175853	192489	230678	212186	203919	218058	203982	190090	201362	197827	202863	0.948865	1.13711	1.04596	1.00521	1.0749	1.00552	0.937036	0.992602	0.975179
C06255	1.30751e+06	1.51664e+06	1.45757e+06	1.45638e+06	1.42228e+06	1.40466e+06	1.41762e+06	1.40208e+06	1.40223e+06	1.44221e+06	1.41169e+06	1.48691e+06	1.42951e+06	1.01879	0.994942	0.982614	0.991682	0.98081	0.980913	1.00888	0.987529	1.04015
C06307	123217	123369	116776	127179	132116	117362	129201	152560	270846	160621	174308	139968	126992	1.00147	1.04035	0.924164	1.0174	1.20133	2.13278	1.26481	1.37259	1.10218
C06323	330417	398617	406995	692249	374125	354743	1.22945e+06	1.41038e+06	3.41624e+06	951588	412393	935440	388862	1.78019	0.962102	0.912261	3.16167	3.62694	8.78523	2.44711	1.06051	2.40558
C06355	1.69549e+06	1.86391e+06	1.81773e+06	1.8955e+06	1.82766e+06	1.80691e+06	1.84936e+06	1.84531e+06	1.79531e+06	1.86011e+06	1.82073e+06	1.83585e+06	1.78591e+06	1.06136	1.02337	1.01176	1.03552	1.03326	1.00526	1.04154	1.01949	1.02796
C06356	2.74865e+06	2.6146e+06	2.61924e+06	2.69489e+06	2.65872e+06	2.64e+06	2.70839e+06	2.88511e+06	2.6607e+06	2.66996e+06	2.6703e+06	2.67567e+06	2.64308e+06	1.0196	1.00592	0.998835	1.02471	1.09157	1.00666	1.01017	1.0103	1.01233
C06368	196079	213999	211324	201596	201481	199176	209838	190883	214468	215434	205248	208857	204059	0.987932	0.987364	0.976072	1.02832	0.935432	1.05101	1.05574	1.00583	1.02351
C06385	530832	355892	371502	488461	564922	537957	430397	400920	406517	438639	464732	518384	435854	1.1207	1.29613	1.23426	0.98748	0.919848	0.93269	1.00639	1.06625	1.18935
C06386	674962	410173	382370	634737	808811	850711	490498	479123	500657	596324	514886	591015	516958	1.22783	1.56456	1.64561	0.948815	0.92681	0.968467	1.15352	0.995991	1.14325
C06391	514586	510514	483947	525978	562575	522793	512237	508844	496868	499167	524049	509911	499579	1.05284	1.1261	1.04647	1.02534	1.01855	0.994574	0.999175	1.04898	1.02068
C06448	639306	592952	584277	648316	637325	611468	653509	706371	600805	640453	666303	678353	599016	1.0823	1.06395	1.02079	1.09097	1.17922	1.00299	1.06917	1.11233	1.13245
C06462	500310	496344	540089	555369	459882	465957	553050	487213	506064	517274	503226	570006	519986	1.06805	0.884412	0.896095	1.06359	0.936974	0.973227	0.994784	0.967768	1.0962
C06469	727197	825871	805739	833771	800115	748425	734356	693627	678892	743185	758986	769166	754994	1.10434	1.05976	0.991299	0.972664	0.918718	0.899201	0.984359	1.00529	1.01877
C06475	1.33402e+06	1.24564e+06	1.28792e+06	1.32871e+06	1.47042e+06	1.381e+06	1.31561e+06	1.32415e+06	1.37296e+06	1.38396e+06	1.32511e+06	1.33364e+06	1.31667e+06	1.00915	1.11677	1.04887	0.999198	1.00569	1.04275	1.05111	1.00642	1.01289
C06499	1.31769e+06	1.45584e+06	1.49227e+06	1.47797e+06	1.41163e+06	1.43087e+06	1.43517e+06	1.41236e+06	1.4813e+06	1.45391e+06	1.40133e+06	1.43265e+06	1.40615e+06	1.05107	1.00389	1.01758	1.02064	1.00442	1.05345	1.03397	0.996573	1.01885
C06523	501576	336277	351027	461540	533787	508308	406676	378824	384112	414464	439119	489814	411833	1.1207	1.29613	1.23426	0.98748	0.919848	0.93269	1.00639	1.06625	1.18935
C06533	427343	481872	470017	473403	442014	470373	447308	445301	458421	469435	449944	472822	457110	1.03564	0.966975	1.02901	0.978557	0.974165	1.00287	1.02696	0.984322	1.03437
C06536	1.01381e+06	87535.6	80006.4	163100	1.78901e+06	1.1415e+06	138841	180080	158585	150892	161298	156767	338329	0.482074	5.28779	3.37392	0.410372	0.532264	0.46873	0.445991	0.476749	0.463356
C06537	1.2229e+07	1.12383e+07	1.50106e+07	9.9298e+06	1.48431e+07	1.07661e+07	1.35271e+07	1.26076e+07	1.04011e+07	1.79299e+07	1.64483e+07	1.84884e+07	1.29347e+07	0.767686	1.14754	0.832345	1.04579	0.974707	0.804123	1.38618	1.27164	1.42936
C06539	228820	240641	249477	245772	235753	229635	236144	239228	244528	241334	236429	240089	238093	1.03225	0.99017	0.964474	0.991816	1.00477	1.02703	1.01361	0.993009	1.00838
C06551	1.14936e+06	703432	706844	1.08855e+06	1.38708e+06	1.26957e+06	841187	821679	858611	1.02268e+06	2.35027e+06	6.19462e+06	897551	1.2128	1.54541	1.41448	0.937203	0.915468	0.956615	1.13941	2.61854	6.9017
C06559	3.36219e+06	3.25644e+06	3.20262e+06	3.46287e+06	3.58124e+06	3.75975e+06	3.2608e+06	3.24187e+06	3.41159e+06	3.39604e+06	3.35925e+06	3.29709e+06	3.28276e+06	1.05487	1.09093	1.1453	0.993311	0.987543	1.03924	1.03451	1.0233	1.00437
C06562	245747	202725	195382	219008	332920	220769	266027	282775	217141	208565	251932	247685	210502	1.04041	1.58155	1.04877	1.26377	1.34333	1.03153	0.990796	1.19682	1.17664
C06574	1.23701e+06	1.17564e+06	1.12309e+06	1.25302e+06	1.19669e+06	1.16708e+06	1.11726e+06	992054	999686	1.12691e+06	1.12995e+06	1.15243e+06	1.1475e+06	1.09195	1.04286	1.01706	0.97364	0.864532	0.871182	0.982056	0.984702	1.00429
C06575	8.56484e+06	1.4166e+07	1.57228e+07	1.2879e+07	1.02293e+07	9.84191e+06	1.09342e+07	9.72334e+06	9.529e+06	1.03659e+07	9.83734e+06	1.09927e+07	1.19378e+07	1.07884	0.856881	0.82443	0.915926	0.814497	0.798218	0.86832	0.824047	0.920828
C06605	1.4583e+06	1.59814e+06	1.53833e+06	1.6544e+06	1.50577e+06	1.50731e+06	1.5423e+06	1.54305e+06	1.56121e+06	1.56825e+06	1.53854e+06	1.52925e+06	1.52012e+06	1.08834	0.990557	0.991572	1.01459	1.01508	1.02703	1.03166	1.01211	1.00601
C06627	203718	129304	133341	147721	205885	170739	155700	202984	144434	145744	159376	168078	151042	0.978013	1.3631	1.13041	1.03084	1.34389	0.95625	0.964922	1.05517	1.11279
C06635	2.82784e+06	2.76956e+06	2.73831e+06	2.65824e+06	2.82704e+06	2.85667e+06	2.71231e+06	2.71215e+06	2.70825e+06	2.78806e+06	2.81184e+06	2.86767e+06	2.79434e+06	0.951292	1.0117	1.0223	0.970644	0.970585	0.96919	0.997752	1.00626	1.02624
C06665	483534	376492	327216	488564	1.22022e+06	1.66427e+06	493437	525646	434863	487547	487471	486888	420199	1.1627	2.90391	3.96068	1.17429	1.25094	1.0349	1.16028	1.16009	1.15871
C06668	754450	610847	625821	646594	793121	733118	667125	700203	614068	648209	623677	659155	648780	0.99663	1.22248	1.12999	1.02828	1.07926	0.946496	0.99912	0.961308	1.01599
C06678	2.1721e+06	2.1549e+06	2.21299e+06	2.14745e+06	2.0707e+06	2.25794e+06	2.14536e+06	2.16195e+06	2.07496e+06	2.11349e+06	2.10288e+06	2.16525e+06	2.1654e+06	0.991711	0.956267	1.04274	0.990747	0.998409	0.958235	0.976027	0.971128	0.999933
C06691	478496	470909	477056	510844	499360	492824	477735	490358	456002	500674	497549	485226	468554	1.09026	1.06575	1.0518	1.0196	1.04654	0.973211	1.06855	1.06188	1.03558
C06693	767273	210370	207263	610216	745773	728622	583176	690905	546452	610682	649781	649749	457537	1.3337	1.62998	1.59249	1.2746	1.51005	1.19433	1.33472	1.42017	1.4201
C06694	861627	279131	268277	731844	1.12925e+06	904420	769306	839223	798291	803763	755849	706505	585339	1.25029	1.92921	1.54512	1.31429	1.43374	1.36381	1.37316	1.2913	1.207
C06722	921576	4.56192e+06	6.12194e+06	987597	1.03432e+06	966266	935030	938543	852190	2.36619e+06	965835	975639	1.2879e+07	0.0766825	0.0803104	0.0750263	0.0726009	0.0728738	0.0661688	0.183725	0.0749928	0.0757541
C06725	174688	170229	177568	165029	177168	182919	167044	165932	158953	153670	165857	162139	166584	0.990661	1.06354	1.09805	1.00276	0.996083	0.954187	0.922475	0.995631	0.973318
C06734	304911	331154	317270	363349	344323	311134	336820	344777	339370	343455	360802	344229	325399	1.11663	1.05816	0.956162	1.0351	1.05955	1.04293	1.05549	1.1088	1.05787
C06742	975665	763163	1.30448e+06	749877	763752	769549	748839	751653	610250	940892	760222	747369	5.40464e+06	0.138747	0.141314	0.142387	0.138555	0.139075	0.112912	0.174089	0.140661	0.138283
C06748	194523	118381	118648	154121	177725	171001	127818	174954	141881	150538	142081	137041	143126	1.07682	1.24174	1.19476	0.893049	1.22238	0.991302	1.05179	0.992701	0.957487
C06756	1.39855e+06	1.32136e+06	1.34166e+06	2.14418e+07	1.35328e+06	1.22902e+06	3.56801e+07	4.12891e+07	2.42706e+07	3.70199e+07	4.18517e+07	4.25861e+07	1.05111e+07	2.03993	0.128748	0.116927	3.39453	3.92816	2.30905	3.522	3.98168	4.05155
C06771	1.02292e+06	1.08281e+06	1.08168e+06	1.21729e+06	1.12922e+06	1.18246e+06	1.12932e+06	1.09986e+06	1.09913e+06	1.0857e+06	1.16714e+06	1.16158e+06	1.07158e+06	1.13598	1.0538	1.10348	1.05389	1.0264	1.02571	1.01318	1.08918	1.084
C06772	852748	913517	909084	827558	902001	923741	916936	895683	874287	872477	855929	856192	880015	0.940391	1.02498	1.04969	1.04195	1.0178	0.993491	0.991434	0.972629	0.972929
C06773	465388	348882	320220	374128	447212	419988	384709	407660	363278	357353	366137	378569	378786	0.987703	1.18065	1.10877	1.01564	1.07623	0.959059	0.943416	0.966607	0.999426
C06804	1.798e+06	1.56384e+06	1.57114e+06	1.75119e+06	1.7884e+06	1.68942e+06	1.83224e+06	1.69592e+06	1.81637e+06	1.7971e+06	1.87508e+06	1.89517e+06	1.664e+06	1.05239	1.07476	1.01527	1.1011	1.01918	1.09157	1.07998	1.12685	1.13892
C06805	88631.4	95462.3	95308	102759	94773.9	96848.7	91340.1	91546.7	99376.5	104747	85786.1	88120.8	93179.6	1.10281	1.01711	1.03938	0.980259	0.982476	1.0665	1.12415	0.920654	0.945709
C06807	819722	786589	786378	1.84355e+07	793184	720357	6.88986e+06	2.87444e+06	2.56818e+06	1.72227e+07	3.86652e+07	6.1581e+06	8.37502e+06	2.20125	0.0947084	0.0860126	0.822669	0.343216	0.306648	2.05644	4.61673	0.735294
C06812	334947	354413	353684	356986	341625	343734	354159	349795	351894	346133	348307	339372	346763	1.02948	0.985181	0.991265	1.02133	1.00874	1.0148	0.998183	1.00445	0.978686
C06817	56698.5	59787.6	59102	60345.1	59348.6	59622.2	56478.3	58932.5	60325.9	56241.1	58926	60838.6	57869.6	1.04278	1.02556	1.03028	0.975958	1.01837	1.04245	0.97186	1.01826	1.05131
C06819	294135	242642	236976	262131	398472	273699	318408	338454	259896	252507	301538	308215	253184	1.03534	1.57385	1.08103	1.25762	1.33679	1.02651	0.997327	1.19099	1.21735
C06820	942373	953520	961692	987001	956372	955093	1.01407e+06	1.05883e+06	958490	993886	999810	969912	944151	1.04538	1.01294	1.01159	1.07406	1.12147	1.01519	1.05268	1.05895	1.02728
C06827	249972	250565	241835	265018	252088	254286	207172	183994	241319	218401	210534	207521	242621	1.09231	1.03902	1.04808	0.853893	0.75836	0.994636	0.900176	0.867752	0.855332
C06837	1.0076e+08	7.41211e+07	7.06582e+07	9.80645e+07	8.46057e+07	9.92019e+07	9.71508e+07	9.12329e+07	9.07434e+07	9.02858e+07	1.01184e+08	1.0038e+08	8.29185e+07	1.18266	1.02035	1.19638	1.17164	1.10027	1.09437	1.08885	1.22029	1.21059
C06861	837546	1.28843e+06	5.70962e+06	827748	780553	1.76095e+06	819979	884929	825546	788232	1.21631e+06	789240	1.75204e+06	0.472447	0.44551	1.00508	0.468012	0.505083	0.47119	0.449892	0.694225	0.450468
C06869	702735	475186	476476	513353	780361	588973	537093	700202	498232	502750	764116	579792	531064	0.966649	1.46943	1.10904	1.01135	1.31849	0.938176	0.946684	1.43884	1.09176
C06878	1.40137e+06	1.45522e+06	1.45269e+06	1.57773e+06	1.41323e+06	1.42556e+06	1.26633e+06	1.11751e+06	1.35287e+06	1.31309e+06	1.3062e+06	1.32679e+06	1.41964e+06	1.11136	0.995486	1.00417	0.892004	0.787176	0.952962	0.924945	0.920092	0.934593
C06913	1.2616e+06	1.29229e+06	1.30968e+06	1.34189e+06	1.50788e+06	1.4857e+06	1.31092e+06	1.3881e+06	1.31888e+06	1.39569e+06	1.36831e+06	1.41721e+06	1.2991e+06	1.03294	1.16072	1.14364	1.0091	1.06852	1.01523	1.07436	1.05328	1.09092
C06918	282977	278490	282125	302107	295316	291450	282527	289992	269674	282801	294244	275579	273720	1.10371	1.0789	1.06477	1.03217	1.05945	0.985217	1.03318	1.07498	1.00679
C06924	336453	277552	278306	299845	455802	302256	304710	387148	280612	285547	303234	304277	290001	1.03395	1.57173	1.04226	1.05072	1.33499	0.967624	0.984642	1.04563	1.04923
C06936	696467	794780	765101	787637	730193	750499	749372	764205	769652	772477	766911	780571	756777	1.04078	0.964873	0.991704	0.990215	1.00982	1.01701	1.02075	1.01339	1.03144
C06948	84178	88562.1	92237	86322.5	89265.3	80910.7	89099.3	92077.4	91794.6	87811.4	89028.7	87489.7	87064.2	0.991481	1.02528	0.929323	1.02338	1.05758	1.05433	1.00858	1.02256	1.00489
C06956	714049	774384	807358	889386	729475	731142	819026	917187	860524	809676	836481	853117	793625	1.12066	0.919169	0.921269	1.03201	1.15569	1.0843	1.02023	1.054	1.07496
C06958	623875	116225	114491	409702	621896	570540	482094	566194	401021	417867	434561	557278	325633	1.25817	1.9098	1.75209	1.48048	1.73875	1.23151	1.28324	1.33451	1.71137
C06967	535507	650685	592547	624832	558528	559701	602292	601538	601601	617022	605659	637932	595345	1.04953	0.938159	0.940129	1.01167	1.0104	1.01051	1.03641	1.01732	1.07153
C06971	313155	193933	165991	235928	265511	291785	245248	244144	227667	241254	239632	246412	222292	1.06134	1.19443	1.31262	1.10327	1.0983	1.02418	1.0853	1.07801	1.10851
C06996	732820	823542	821016	806492	796362	794489	809644	816377	824215	800526	783754	799966	791962	1.01835	1.00556	1.00319	1.02233	1.03083	1.04073	1.01081	0.989636	1.01011
C07002	1.02142e+06	1.22811e+06	1.1459e+06	1.261e+06	1.03963e+06	1.03285e+06	1.171e+06	1.12462e+06	1.17407e+06	1.20043e+06	1.10683e+06	1.08462e+06	1.13824e+06	1.10785	0.913367	0.907407	1.02878	0.988036	1.03148	1.05464	0.972401	0.952888
C07007	1.76039e+08	1.44935e+06	1.36825e+06	1.04961e+08	9.12467e+07	1.45408e+08	8.09183e+07	8.20723e+07	4.5257e+07	5.01762e+07	5.75869e+07	9.4063e+07	6.31661e+07	1.66166	1.44455	2.30199	1.28104	1.29931	0.716476	0.794353	0.911675	1.48914
C07020	502267	447852	463354	1.66856e+06	516678	515061	1.35198e+06	1.45059e+06	1.04266e+06	1.69651e+06	1.70181e+06	1.84188e+06	730243	2.28494	0.707543	0.705329	1.85141	1.98645	1.42782	2.32321	2.33047	2.52228
C07023	201148	143692	140264	164567	184117	185015	170231	176253	157958	162144	157442	168706	161404	1.01959	1.14072	1.14628	1.05469	1.092	0.978649	1.00458	0.975448	1.04524
C07040	435352	377029	363283	452760	480664	418452	471278	445997	358606	397134	478442	441833	392250	1.15426	1.2254	1.0668	1.20147	1.13702	0.914228	1.01245	1.21974	1.12641
C07045	794757	720375	720382	821372	806051	796574	752550	833046	734472	803599	783455	785971	740728	1.10887	1.08819	1.07539	1.01596	1.12463	0.991553	1.08488	1.05768	1.06108
C07073	543799	660760	620231	634507	567176	611975	617623	610852	610916	628333	615036	647810	607958	1.04367	0.93292	1.00661	1.0159	1.00476	1.00486	1.03351	1.01164	1.06555
C07078	439066	396108	393467	437136	445305	424060	402230	423278	401400	443951	412582	417896	407999	1.07141	1.09144	1.03936	0.985859	1.03745	0.983825	1.08812	1.01123	1.02426
C07079													#DIV/0!	#DIV/0!	#DIV/0!	#DIV/0!	#DIV/0!	#DIV/0!	#DIV/0!	#DIV/0!	#DIV/0!	#DIV/0!
C07100	651594	1.84152e+06	294115	1.12148e+06	729960	471773	583222	1.62742e+06	623537	922380	720596	766231	1.03487e+06	1.08369	0.705363	0.455876	0.563569	1.57258	0.602525	0.891298	0.696314	0.740412
C07113	4.59472e+06	8.82858e+06	9.69389e+06	1.50564e+08	6.27871e+06	6.65116e+06	1.79147e+08	6.25082e+06	6.66205e+07	1.70332e+08	1.46014e+08	1.67395e+08	3.0704e+07	4.90374	0.204492	0.216622	5.83464	0.203583	2.16977	5.54755	4.75553	5.4519
C07115	4.2571e+08	1.35184e+07	3.98194e+06	1.16667e+07	7.21486e+06	2.86965e+07	9.72969e+06	6.27783e+07	4.79987e+06	5.16328e+06	1.73707e+08	9.24484e+06	1.26238e+08	0.0924186	0.0571528	0.22732	0.0770741	0.497301	0.0380224	0.0409012	1.37602	0.0732334
C07122	1.22614e+06	509363	486444	815479	1.39614e+06	1.35156e+06	684074	869106	693318	785036	808534	839786	758438	1.07521	1.84081	1.78203	0.901952	1.14592	0.91414	1.03507	1.06605	1.10726
C07124	646903	791427	779203	2.01131e+07	672285	725036	1.79274e+07	1.41806e+07	1.29786e+07	1.67167e+07	1.43347e+07	1.69892e+07	3.13076e+06	6.42436	0.214736	0.231585	5.7262	4.52946	4.14551	5.33952	4.57867	5.42655
C07125	1.36585e+06	1.07336e+06	1.04949e+06	1.1067e+06	1.40173e+06	1.28062e+06	1.09089e+06	1.07287e+06	1.04632e+06	1.14899e+06	1.03901e+06	1.05476e+06	1.13696e+06	0.973384	1.23288	1.12636	0.959484	0.943633	0.920284	1.01058	0.913853	0.927704
C07127	652126	628373	646723	664687	681406	634763	690253	764454	694178	672266	625247	639843	644930	1.03063	1.05656	0.984235	1.07028	1.18533	1.07636	1.04239	0.969481	0.992112
C07130	520926	489035	489116	557598	542057	540764	523117	565523	498605	540727	531858	533566	497263	1.12133	1.09008	1.08748	1.05199	1.13727	1.0027	1.08741	1.06957	1.07301
C07148	6.60336e+07	2.04248e+06	1.57989e+06	2.3945e+06	2.0639e+06	2.10646e+06	2.62384e+06	2.03673e+06	1.48631e+06	1.08993e+06	1.80154e+06	1.72376e+06	1.77638e+07	0.134797	0.116186	0.118582	0.147707	0.114657	0.0836711	0.0613571	0.101417	0.097038
C07153	702464	752524	748872	712873	738680	743610	755340	748506	717031	718716	705084	689411	724926	0.983374	1.01897	1.02577	1.04195	1.03253	0.98911	0.991434	0.972629	0.951008
C07165	772966	725750	725766	827381	804321	802403	789815	839142	746688	802539	789187	879638	737880	1.12129	1.09004	1.08744	1.07038	1.13723	1.01194	1.08763	1.06953	1.19211
C07172	486255	326005	340305	447442	517483	492782	394254	367252	372379	401804	425706	474852	399253	1.1207	1.29613	1.23426	0.98748	0.919848	0.93269	1.00639	1.06625	1.18935
C07175	292657	260763	275613	296384	305448	298272	277862	280999	277370	292241	275628	282504	273782	1.08255	1.11566	1.08945	1.0149	1.02636	1.01311	1.06742	1.00674	1.03186
C07178	830905	760432	775861	814654	803721	820060	770423	872156	783427	773329	786280	793576	784453	1.0385	1.02456	1.04539	0.982115	1.1118	0.998692	0.985819	1.00233	1.01163
C07180	1.12438e+06	363230	344565	855743	1.09992e+06	1.06612e+06	896389	990939	866826	905665	919353	955903	710827	1.20387	1.54738	1.49983	1.26105	1.39406	1.21946	1.2741	1.29336	1.34478
C07182	9.71145e+09	1.55854e+08	8.21832e+07	1.64453e+09	9.71809e+09	8.22108e+09	2.1153e+09	3.01022e+09	1.23246e+09	2.42572e+09	2.37033e+09	2.58779e+09	2.90822e+09	0.565476	3.3416	2.82684	0.727354	1.03507	0.423787	0.834092	0.815045	0.88982
C07184	171276	194803	190033	192647	184665	180752	183512	179906	188497	190983	188957	187571	185909	1.03624	0.993309	0.972257	0.987103	0.967708	1.01392	1.02729	1.0164	1.00894
C07192	1.01615e+06	695173	1.46482e+06	675818	1.15703e+06	1.12009e+06	607540	720261	590764	650590	785892	656434	954215	0.708245	1.21255	1.17383	0.636691	0.754821	0.61911	0.681806	0.823601	0.687931
C07198	396508	318318	296024	386489	410050	413422	364502	402760	306116	367179	408412	388419	340756	1.13421	1.20335	1.21325	1.06969	1.18196	0.898343	1.07754	1.19854	1.13987
C07199	2.46635e+06	2.42841e+06	2.52268e+06	2.71462e+06	2.77767e+06	2.45556e+06	2.59544e+06	2.81433e+06	2.56998e+06	2.64593e+06	2.62022e+06	2.7042e+06	2.49013e+06	1.09015	1.11547	0.986116	1.04229	1.13019	1.03207	1.06257	1.05224	1.08597
C07241	751572	882653	712558	1.38295e+07	835802	754215	994282	2.48896e+06	2.01559e+06	1.04849e+06	4.69345e+06	2.31289e+06	832964	16.6027	1.00341	0.905459	1.19367	2.98807	2.41978	1.25875	5.63464	2.7767
C07250	226582	197178	208095	749924	233083	232353	609902	654388	470360	711787	700438	791212	328056	2.28596	0.710497	0.708273	1.85914	1.99474	1.43378	2.16971	2.13512	2.41182
C07254	6.41671e+06	7.85138e+07	7.43155e+07	3.99505e+07	9.84059e+06	2.65638e+07	8.90054e+06	2.06582e+07	2.63337e+07	3.1052e+07	2.71095e+07	3.05112e+07	4.37134e+07	0.913919	0.225116	0.607681	0.203611	0.472582	0.602416	0.710353	0.620164	0.697982
C07263	436356	289640	302345	403796	496501	479063	350276	341370	340125	410778	378219	421884	360077	1.12141	1.37887	1.33045	0.972781	0.948045	0.944588	1.1408	1.05038	1.17165
C07267	169350	177353	183716	183656	173516	174226	179429	186297	174108	178889	186378	181361	176585	1.04005	0.982621	0.986644	1.01611	1.055	0.985974	1.01305	1.05546	1.02705
C07272	1.487e+07	1.4189e+07	2.33549e+07	2.71517e+07	8.20988e+07	8.25117e+07	8.3791e+07	8.16071e+07	1.12798e+07	1.81573e+07	8.31967e+07	8.16911e+07	2.69006e+07	1.00933	3.05193	3.06728	3.11483	3.03365	0.419314	0.674978	3.09274	3.03677
C07273	586424	386112	359941	597504	704500	623046	461726	451018	463174	561344	484683	556346	474398	1.2595	1.48504	1.31334	0.973288	0.950716	0.976342	1.18328	1.02168	1.17274
C07280	952288	853954	890597	1.01276e+06	951142	938607	989488	913931	940579	864399	948015	899365	890158	1.13773	1.06851	1.05443	1.11159	1.02671	1.05664	0.971062	1.065	1.01034
C07287	1.59309e+06	1.90383e+06	1.84291e+06	1.81356e+06	1.72586e+06	1.7148e+06	1.80494e+06	1.74332e+06	1.80036e+06	1.75757e+06	1.74535e+06	1.80428e+06	1.77274e+06	1.02303	0.973556	0.967314	1.01816	0.983404	1.01558	0.991443	0.98455	1.01779
C07289	558702	188353	174374	455677	3.19489e+06	2.29489e+06	429434	652126	448720	467835	473527	502426	360312	1.26467	8.86701	6.36918	1.19184	1.80989	1.24537	1.29842	1.31421	1.39442
C07308													#DIV/0!	#DIV/0!	#DIV/0!	#DIV/0!	#DIV/0!	#DIV/0!	#DIV/0!	#DIV/0!	#DIV/0!	#DIV/0!
C07309	470260	315282	329111	439543	500460	476572	381286	369757	370235	447143	411702	459232	386493	1.13726	1.29488	1.23307	0.986527	0.956698	0.957936	1.15693	1.06523	1.1882
C07310	1.04014e+06	1.08898e+06	1.13181e+06	1.02266e+06	1.12343e+06	950482	1.08547e+06	1.21833e+06	1.00507e+06	1.1549e+06	1.16987e+06	1.04279e+06	1.0609e+06	0.963954	1.05894	0.895922	1.02316	1.1484	0.947377	1.0886	1.10272	0.982931
C07317	241990	218662	226136	226675	229011	224547	228577	228309	224361	223768	228000	220164	228973	0.989964	1.00016	0.980667	0.998268	0.997099	0.979856	0.977266	0.99575	0.961527
C07318	212563	201838	208242	185792	202271	217006	186478	185566	179468	191683	198469	190028	197386	0.941263	1.02475	1.0994	0.944739	0.940119	0.909223	0.971107	1.00549	0.962721
C07321	1.41412e+06	4.43519e+06	1.60748e+07	2.59088e+06	2.5614e+06	1.2398e+06	1.36023e+06	1.86582e+06	1.3886e+06	1.29376e+06	2.43332e+06	4.41111e+06	7.73381e+06	0.335007	0.331195	0.160309	0.175881	0.241254	0.179549	0.167287	0.314634	0.570367
C07327	438705	291199	303972	405969	499173	481641	344276	343207	341955	412989	368797	424154	362015	1.12141	1.37887	1.33045	0.950998	0.948045	0.944588	1.1408	1.01873	1.17165
C07332	414418	457497	408635	1.14984e+07	401549	359691	528807	1.10352e+06	494339	1.44493e+06	619196	1.35635e+06	547824	20.9892	0.73299	0.656581	0.965287	2.01438	0.90237	2.63759	1.13028	2.47589
C07339	543372	596671	601673	646691	598383	619246	599555	632215	627138	632278	641544	620188	584121	1.10712	1.02442	1.06013	1.02642	1.08234	1.07364	1.08244	1.09831	1.06174
C07354	562211	423589	409512	691084	534120	498329	661949	839654	556086	663555	631101	742110	503256	1.37322	1.06133	0.990209	1.31533	1.66844	1.10498	1.31852	1.25404	1.47462
C07356	99993.8	72937	89258	91453.6	105277	104889	83021.8	82443.8	83752.8	87615.3	82906.7	87299.3	86608	1.05595	1.21556	1.21108	0.958592	0.951919	0.967033	1.01163	0.957264	1.00798
C07366	262224	274526	273371	272877	277512	269723	280533	272282	281264	278891	275129	274683	269644	1.01199	1.02918	1.00029	1.04038	1.00978	1.04309	1.03429	1.02034	1.01869
C07369	1.74911e+09	7.87053e+06	5.6789e+06	1.17202e+08	1.52806e+09	1.33596e+09	1.71058e+08	3.15863e+08	4.62882e+07	2.00088e+08	2.18452e+08	3.862e+07	4.6989e+08	0.249426	3.25197	2.84314	0.364038	0.672207	0.0985087	0.425819	0.464901	0.0821895
C07370	568101	644377	631548	683901	582985	599962	630193	610588	627135	676510	640211	620253	619938	1.10318	0.940392	0.967778	1.01654	0.984918	1.01161	1.09126	1.0327	1.00051
C07373	1.77358e+06	1.80538e+06	1.73758e+06	1.83583e+06	1.7891e+06	1.84132e+06	1.89575e+06	1.8196e+06	1.79924e+06	1.8543e+06	1.82829e+06	1.75691e+06	1.77618e+06	1.03359	1.00727	1.03667	1.06732	1.02444	1.01298	1.04398	1.02934	0.989151
C07402	291847	276890	280623	1.11652e+06	283772	298900	1.14084e+06	1.61724e+06	808366	1.22105e+06	1.25559e+06	1.42636e+06	488969	2.28341	0.580348	0.611285	2.33316	3.30744	1.6532	2.49719	2.56783	2.91708
C07404	223408	235323	230305	244560	232458	239419	236148	238490	236914	226436	234133	233561	231411	1.05682	1.00453	1.03461	1.02047	1.03059	1.02378	0.978503	1.01176	1.00929
C07415	230430	138605	141436	215434	276827	244820	180027	177223	182000	220575	190452	218611	182537	1.18022	1.51655	1.34121	0.986248	0.970889	0.997059	1.20839	1.04336	1.19763
C07422	2.77813e+06	2.68312e+06	2.72657e+06	2.69862e+06	2.81852e+06	2.89003e+06	2.66414e+06	2.66939e+06	2.82183e+06	2.842e+06	2.72349e+06	2.74101e+06	2.73587e+06	0.986385	1.03021	1.05635	0.973783	0.975703	1.03142	1.03879	0.995476	1.00188
C07425	3.69179e+07	3.62417e+06	3.46065e+06	1.14782e+07	2.78995e+06	5.91593e+06	3.31614e+07	3.25567e+07	1.88902e+07	2.67147e+08	2.49289e+06	2.10157e+06	1.42325e+07	0.806478	0.196027	0.415664	2.32998	2.2875	1.32726	18.7703	0.175155	0.14766
C07427	724154	801121	749502	787903	893228	880086	772108	822273	781269	782424	810546	792636	766917	1.02736	1.1647	1.14756	1.00677	1.07218	1.01871	1.02022	1.05689	1.03354
C07445	635513	386200	360023	597639	761539	800991	461830	451120	471396	561472	484793	556472	485231	1.23166	1.56944	1.65074	0.951775	0.929702	0.971489	1.15712	0.999098	1.14682
C07454	274411	62684.6	52894.5	155602	199595	231076	162372	202776	164780	164695	186000	205203	146917	1.05911	1.35856	1.57284	1.1052	1.38021	1.12159	1.12101	1.26603	1.39673
C07460	2.15695e+07	754250	715070	3.14608e+06	1.94479e+07	1.83553e+07	1.74452e+06	1.72121e+06	3.87318e+06	2.37626e+06	3.51414e+06	3.94513e+06	6.30418e+06	0.499046	3.08492	2.91162	0.276725	0.273027	0.614383	0.376934	0.557431	0.625796
C07461	4.26267e+07	3.15058e+07	2.20819e+07	4.23077e+07	4.37287e+07	4.37146e+07	3.05729e+07	3.90071e+07	3.74375e+07	3.92076e+07	3.78117e+07	4.04214e+07	3.28832e+07	1.28661	1.32982	1.32939	0.929745	1.18623	1.1385	1.19233	1.14988	1.22924
C07463	5.93198e+06	1.79954e+06	1.7462e+06	2.68568e+06	3.32432e+06	3.0924e+06	3.8686e+06	2.74364e+06	2.31349e+06	4.8387e+06	4.57865e+06	5.20283e+06	3.15666e+06	0.850796	1.05311	0.979641	1.22553	0.869159	0.732892	1.53285	1.45047	1.64821
C07466	850924	162581	158493	273509	453141	670131	228570	295685	194948	217351	224005	257254	342808	0.797849	1.32185	1.95483	0.666758	0.862537	0.56868	0.634032	0.653442	0.750431
C07467	1.4311e+06	1.2404e+06	1.27492e+06	1.34362e+06	1.52919e+06	1.42304e+06	1.37941e+06	1.29943e+06	1.30163e+06	1.35813e+06	1.33575e+06	1.46116e+06	1.32893e+06	1.01105	1.15069	1.07082	1.03799	0.977808	0.979458	1.02197	1.00513	1.0995
C07469	5.95462e+06	1.12883e+06	1.4643e+06	732163	583931	641348	3.66106e+06	1.1398e+06	1.34425e+06	1.47401e+06	4.55842e+06	1.26738e+06	2.49674e+06	0.293248	0.233877	0.256874	1.46634	0.456515	0.538401	0.590373	1.82575	0.507612
C07481	205127	224602	224870	242963	236033	206379	217892	247310	248521	255866	227367	211948	221467	1.09706	1.06577	0.931871	0.983858	1.11669	1.12216	1.15533	1.02664	0.957018
C07482	290179	259910	266267	686863	290654	301567	373429	766564	292574	376661	564332	604741	279455	2.45787	1.04008	1.07913	1.33628	2.74307	1.04694	1.34784	2.0194	2.164
C07497	1.88274e+06	1.33172e+06	1.411e+06	1.33345e+06	1.82688e+06	1.63361e+06	1.43212e+06	1.80114e+06	1.28186e+06	1.33132e+06	1.48095e+06	1.60236e+06	1.45489e+06	0.916531	1.25569	1.12284	0.984349	1.23799	0.881069	0.915071	1.01791	1.10137
C07498	490522	542658	507692	519656	605048	596146	523005	556986	529211	511129	549042	536910	519489	1.00032	1.1647	1.14756	1.00677	1.07218	1.01871	0.983908	1.05689	1.03354
C07499	417017	422928	453772	5.05088e+07	450412	381072	6.66677e+06	3.05242e+06	3.22523e+07	8.44134e+06	7.15025e+06	5.48382e+06	2.67317e+06	18.8947	0.168494	0.142554	2.49396	1.14187	12.0652	3.1578	2.67482	2.05143
C07501	153119	155309	150034	150985	159003	160412	154639	156019	157646	153538	151142	145472	153225	0.985381	1.03771	1.0469	1.00922	1.01823	1.02885	1.00204	0.986401	0.949399
C07505	414374	411637	400599	424923	439878	417069	422912	420111	410223	440452	432664	416269	407553	1.04262	1.07932	1.02335	1.03769	1.03081	1.00655	1.08072	1.06161	1.02139
C07518	533142	323989	302029	501369	638867	671964	387437	378452	395462	471028	406701	466834	407068	1.23166	1.56944	1.65074	0.951775	0.929702	0.971489	1.15712	0.999098	1.14682
C07519	339567	320790	331507	311947	345622	321667	322931	294612	300728	295243	323469	320809	314187	0.992872	1.10005	1.02381	1.02783	0.937699	0.957165	0.939706	1.02954	1.02108
C07523	2.47373e+07	2.13193e+06	1.87198e+06	1.66277e+06	3.47257e+06	1.9229e+06	1.66114e+07	8.35984e+06	8.66738e+06	1.32396e+06	1.79217e+06	3.43642e+06	9.20027e+06	0.180731	0.377442	0.209004	1.80553	0.908651	0.942079	0.143904	0.194795	0.373513
C07544	4.42957e+06	4.81867e+06	4.84888e+06	5.1321e+06	4.53312e+06	4.54449e+06	4.89116e+06	5.1357e+06	5.02951e+06	5.23756e+06	4.93298e+06	5.01888e+06	4.78923e+06	1.07159	0.946524	0.948899	1.02129	1.07234	1.05017	1.09361	1.03002	1.04795
C07545	600307	689057	675640	731322	621074	643067	645159	744473	670619	723418	684603	670699	668922	1.09328	0.928471	0.961348	0.964476	1.11295	1.00254	1.08147	1.02344	1.00266
C07546	1.18454e+06	1.08196e+06	1.03477e+06	2.2383e+06	1.19868e+06	1.17865e+06	2.16455e+06	2.54235e+06	2.14758e+06	2.15458e+06	2.263e+06	2.56778e+06	1.40855e+06	1.58908	0.851	0.83678	1.53672	1.80493	1.52467	1.52964	1.60661	1.82299
C07550	461949	328015	350397	364118	451773	402994	394974	514923	366126	367222	388565	396671	371473	0.9802	1.21617	1.08485	1.06326	1.38616	0.985606	0.988557	1.04601	1.06783
C07565	389720	312868	290956	379872	403030	406344	358262	395865	300875	360893	401420	381769	334923	1.13421	1.20335	1.21325	1.06969	1.18196	0.898343	1.07754	1.19854	1.13987
C07567	6.09764e+07	740249	763530	730938	3.22695e+07	2.63524e+07	691544	722604	701662	702430	728825	688961	1.57912e+07	0.0462877	2.04351	1.6688	0.043793	0.0457599	0.0444338	0.0444824	0.0461539	0.0436294
C07569	60403.3	40262.7	38873	48789.7	59671.9	54190.8	50812.7	48092.6	45719.1	44325.9	44599.4	46922.5	47171.3	1.03431	1.26501	1.14881	1.0772	1.01953	0.969214	0.93968	0.945477	0.994726
C07580	2.89151e+06	2.53886e+06	2.57596e+06	2.71475e+06	3.08969e+06	2.87523e+06	2.78706e+06	2.62548e+06	2.72225e+06	2.74407e+06	2.69885e+06	2.95224e+06	2.69323e+06	1.00799	1.1472	1.06757	1.03484	0.974843	1.01077	1.01888	1.00209	1.09617
C07592	497312	534229	579128	621370	637667	562103	595832	587749	586235	586376	595509	550718	538299	1.15432	1.1846	1.04422	1.10688	1.09186	1.08905	1.08931	1.10628	1.02307
C07593	776242	366737	323507	516262	883865	855643	502066	491134	425318	496990	511866	475110	489628	1.0544	1.80518	1.74754	1.0254	1.00308	0.868657	1.01504	1.04542	0.97035
C07641	2.08476e+07	2.12903e+07	1.9725e+07	2.18926e+07	3.49789e+07	2.57074e+07	2.31751e+07	2.73304e+07	1.9398e+07	1.6953e+07	2.44563e+07	2.22994e+07	2.08292e+07	1.05105	1.67931	1.2342	1.11263	1.31212	0.931288	0.813903	1.17414	1.07058
C07650	573944	635120	615447	655171	648130	645393	634007	659346	649968	661860	679150	658660	617385	1.0612	1.0498	1.04537	1.02692	1.06797	1.05278	1.07204	1.10004	1.06685
C07653	2.64821e+06	281061	227125	395655	6.82033e+07	506585	6.6216e+07	346628	440302	380885	3.24864e+07	4.15624e+07	884094	0.447526	77.1449	0.572998	74.897	0.392072	0.498026	0.43082	36.7454	47.0113
C07661	270978	319924	321929	326322	287650	271871	315877	302419	313564	300332	321285	319037	306606	1.0643	0.938175	0.88671	1.03024	0.986344	1.02269	0.979538	1.04787	1.04054
C07662	605247	548227	547931	1.80005e+06	647688	629000	906593	1.62779e+06	647138	1.86148e+06	1.8458e+06	2.11381e+06	599154	3.00432	1.081	1.04981	1.51312	2.71682	1.08009	3.10685	3.08067	3.52799
C07670	37922.3	36038.6	38426.1	92154.2	40513.5	38860.5	81142.1	97102.7	74761.9	89396.9	90594	93915.5	49765	1.85179	0.814096	0.780879	1.6305	1.95122	1.5023	1.79638	1.82044	1.88718
C07704	511108	385086	372289	1.8201e+06	485570	453032	1.61035e+06	3.00009e+06	2.10591e+06	3.02719e+06	1.01388e+07	2.90059e+06	743165	2.44913	0.653381	0.609598	2.16688	4.03691	2.83371	4.07338	13.6427	3.90302
C07706	640378	520958	696639	652090	664156	630562	651187	653634	1.14652e+06	603852	661086	649909	585721	1.11331	1.13391	1.07656	1.11177	1.11595	1.95745	1.03096	1.12867	1.10959
C07708	107452	123029	113271	107015	91510.9	115624	105297	103348	130719	117845	93962.7	108315	114961	0.93088	0.796015	1.00576	0.915935	0.898984	1.13707	1.02509	0.817342	0.942184
C07734	365375	237461	232160	254376	354535	317028	275741	349539	248764	250972	287402	289431	269486	0.94393	1.3156	1.17642	1.02321	1.29706	0.923105	0.931296	1.06648	1.07401
C07756	285179	431060	302136	136728	167225	532622	258830	198635	202300	193194	322531	233597	330637	0.413529	0.505765	1.6109	0.782822	0.600764	0.611848	0.584308	0.975483	0.706505
C07777	646663	687049	682838	690141	664440	696455	683754	702825	679382	676091	672456	683650	670176	1.02979	0.991441	1.03921	1.02026	1.04872	1.01374	1.00882	1.0034	1.0201
C07792	743124	823280	839091	905308	768832	796057	810584	921589	830165	895525	847474	849499	821087	1.10257	0.936359	0.969515	0.987209	1.1224	1.01106	1.09066	1.03214	1.0346
C07805	206090	211147	198697	218536	212350	205095	215107	205557	227909	198963	207072	199810	204046	1.07101	1.0407	1.00514	1.05421	1.00741	1.11695	0.975087	1.01483	0.979239
C07809	358331	361381	327741	2.18853e+06	392206	384091	1.97205e+07	4.37269e+06	379216	9.33102e+06	8.8561e+06	4.44568e+06	587749	3.72357	0.667302	0.653495	33.5525	7.43972	0.6452	15.8759	15.0678	7.56391
C07817	335014	252177	247296	284089	320636	310530	292818	289636	289919	279259	267250	275645	275041	1.0329	1.16578	1.12903	1.06463	1.05307	1.05409	1.01534	0.971675	1.0022
C07819	874732	969084	987695	1.06564e+06	904994	937040	1.00749e+06	1.0848e+06	986436	977208	1.00968e+06	999947	966503	1.10257	0.936359	0.969515	1.0424	1.1224	1.02062	1.01108	1.04467	1.0346
C07844	3.1306e+06	418614	456058	533429	2.89496e+06	1.89161e+06	494756	556816	495181	500483	490709	523362	1.12574e+06	0.473846	2.5716	1.68032	0.439493	0.49462	0.43987	0.444579	0.435897	0.464904
C07846	522877	359405	373729	525853	568130	533511	468662	525807	462619	485209	482175	489631	435104	1.20857	1.30573	1.22617	1.07713	1.20846	1.06324	1.11516	1.10818	1.12532
C07852	675303	562085	600975	637485	661003	677712	625684	656351	618806	615148	619289	671711	605525	1.05278	1.09162	1.11921	1.03329	1.08394	1.02193	1.01589	1.02273	1.1093
C07871	434193	383927	404594	3.63138e+07	421684	439755	453479	512937	4.51695e+07	432586	441101	451480	1.34537e+07	2.69917	0.0313433	0.0326865	0.0337066	0.0381261	3.3574	0.0321537	0.0327865	0.033558
C07872	786364	864974	825405	1.64415e+08	798228	768929	1.66314e+07	1.4141e+08	1.85746e+07	1.73918e+07	3.86894e+07	4.03778e+07	1.32719e+07	12.3882	0.0601441	0.0579365	1.25313	10.6548	1.39954	1.31042	2.91514	3.04235
C07875	352447	356567	359589	292979	337491	379430	311111	310007	286144	288813	343000	357447	344595	0.850213	0.979385	1.10109	0.902831	0.899626	0.830376	0.838123	0.995372	1.0373
C07890	228000	141578	129863	181781	229435	225801	187016	199159	171591	162878	146319	181559	169054	1.07528	1.35717	1.33567	1.10625	1.17808	1.015	0.963464	0.865516	1.07397
C07905	209048	238557	225111	229040	214866	216579	221072	221750	231015	221780	226629	234292	222606	1.0289	0.965227	0.972924	0.993105	0.996154	1.03777	0.996288	1.01807	1.0525
C07908	562579	814246	532995	1.0166e+06	707929	578260	777349	790044	1.20963e+06	546629	523360	533689	608749	1.66999	1.16292	0.949916	1.27696	1.29782	1.98708	0.897954	0.85973	0.876697
C07919	253373	229604	233891	768307	259438	257383	544404	681740	280554	812366	815203	929741	291842	2.63261	0.888966	0.881927	1.86541	2.33599	0.961321	2.78358	2.7933	3.18577
C07927	831061	788310	757569	868064	865249	871099	817069	798919	847319	831661	845894	798569	803487	1.08037	1.07687	1.08415	1.0169	0.994315	1.05455	1.03506	1.05278	0.993879
C07956	601288	542817	523765	599185	561994	559115	603785	641601	555090	549020	615605	612236	552195	1.0851	1.01775	1.01253	1.09343	1.16191	1.00524	0.99425	1.11483	1.10873
C07965	1.16492e+06	1.62508e+06	1.25783e+06	2.97676e+06	1.21651e+06	1.20086e+06	1.01167e+06	1.33561e+06	2.27734e+06	2.51156e+06	2.70376e+06	1.55034e+06	1.50588e+06	1.97676	0.80784	0.79745	0.671816	0.886932	1.5123	1.66784	1.79547	1.02953
C07966	941407	943161	950123	1.05753e+06	953384	934359	952577	2.68564e+06	955057	2.83312e+06	2.77121e+06	3.88632e+06	941118	1.1237	1.01303	0.992818	1.01218	2.85367	1.01481	3.01038	2.94459	4.12948
C07967	4.17189e+07	1.796e+07	3.96916e+07	3.73235e+07	3.74188e+07	3.49386e+07	4.30047e+07	3.94658e+07	4.16779e+07	4.19728e+07	4.41188e+07	3.93322e+07	3.49407e+07	1.0682	1.07093	0.999941	1.23079	1.12951	1.19282	1.20126	1.26268	1.12569
C07971	1.12558e+06	4.84663e+06	5.30201e+06	4.08493e+06	1.66037e+07	2.35166e+07	3.57172e+06	2.72317e+06	3.80608e+06	4.80848e+06	5.07841e+06	4.73958e+06	4.18749e+06	0.975507	3.96506	5.61593	0.852951	0.650311	0.908916	1.1483	1.21276	1.13184
C07973	4.63154e+06	1.93694e+06	1.99775e+06	6.64389e+06	6.87328e+06	7.81245e+06	6.36492e+06	7.91863e+06	6.99599e+06	6.27886e+06	8.01432e+06	5.2915e+06	4.23101e+06	1.57028	1.6245	1.84648	1.50435	1.87157	1.6535	1.48401	1.89419	1.25065
C07997	423033	596526	306461	460441	525638	598369	432396	489218	541450	414649	433245	434744	435996	1.05607	1.2056	1.37242	0.991744	1.12207	1.24187	0.951039	0.993691	0.99713
C08005	1.31393e+06	1.1146e+06	1.15546e+06	1.21935e+06	1.23125e+06	1.19721e+06	1.4303e+06	1.26552e+06	1.16894e+06	1.16335e+06	1.20486e+06	1.2331e+06	1.1799e+06	1.03344	1.04352	1.01467	1.21222	1.07256	0.990709	0.985972	1.02115	1.04508
C08021	3.74465e+07	2.4322e+07	2.02989e+07	3.44599e+06	3.521e+07	3.36931e+07	2.54702e+07	3.19058e+07	1.76238e+06	1.8825e+07	1.80962e+07	2.03631e+07	2.63393e+07	0.130831	1.33679	1.27919	0.967005	1.21134	0.0669106	0.71471	0.687041	0.773106
C08022	633257	690499	624421	645976	653847	621181	777826	1.20238e+06	674177	775702	677477	661911	706287	0.914608	0.925753	0.879502	1.10129	1.7024	0.954537	1.09828	0.959209	0.93717
C08057	2.57657e+08	4.73017e+08	2.12623e+08	5.30639e+08	5.32081e+08	2.56466e+08	5.01628e+08	2.4891e+08	4.9574e+08	5.2923e+08	2.67897e+08	5.60053e+08	3.25712e+08	1.62917	1.6336	0.787402	1.5401	0.764204	1.52202	1.62484	0.822496	1.71948
C08092	2.59147e+06	2.50284e+06	2.54337e+06	2.5474e+06	2.81908e+06	2.69584e+06	2.52228e+06	2.53866e+06	2.63223e+06	2.65333e+06	2.5405e+06	2.55684e+06	2.57382e+06	0.989736	1.09529	1.04741	0.979978	0.986341	1.0227	1.03089	0.987056	0.993405
C08095	1.22177e+06	1.21721e+06	1.21166e+06	1.36067e+06	1.25683e+06	1.23082e+06	1.25458e+06	1.34062e+06	1.28818e+06	1.32625e+06	1.31336e+06	1.28411e+06	1.23475e+06	1.10198	1.01788	0.996818	1.01606	1.08574	1.04327	1.0741	1.06366	1.03997
C08117	330064	333922	336752	355369	316058	355332	291353	281357	267971	270471	298162	334746	322710	1.1012	0.979385	1.10109	0.902831	0.871857	0.830376	0.838123	0.923932	1.0373
C08141	2.90566e+07	2.64519e+07	2.60635e+07	3.19841e+07	2.58136e+07	3.14481e+07	2.79488e+07	2.7219e+07	2.79368e+07	2.64321e+07	2.88551e+07	3.03074e+07	2.70142e+07	1.18398	0.955555	1.16413	1.0346	1.00758	1.03415	0.978451	1.06815	1.12191
C08148	668525	641504	641331	1.38308e+08	646882	587488	1.46669e+08	2.16583e+07	6.50932e+07	2.22647e+08	2.31682e+08	2.52755e+08	3.72894e+07	3.70903	0.0173476	0.0157548	3.93327	0.580816	1.74562	5.97078	6.21309	6.77819
C08157	170953	127515	128211	157592	179986	175521	134844	140886	133702	149791	159917	147447	142686	1.10447	1.26142	1.23012	0.945043	0.987385	0.93704	1.04979	1.12076	1.03337
C08175	1.84644e+09	8.14129e+07	6.95476e+07	8.11965e+08	1.71275e+09	1.50043e+09	8.97051e+08	1.11752e+09	5.19564e+08	8.7595e+08	9.20394e+08	1.03578e+09	7.04307e+08	1.15286	2.43182	2.13037	1.27366	1.5867	0.737695	1.2437	1.30681	1.47063
C08183	6.53415e+07	884168	934754	1.96594e+06	7.21885e+07	5.5914e+07	973186	1.02089e+06	962489	1.03753e+06	963240	1.04478e+06	1.71416e+07	0.114688	4.2113	3.26189	0.0567734	0.0595561	0.0561493	0.0605269	0.0561931	0.0609498
C08185	248917	247476	252062	252562	244176	246110	239565	252928	245196	250625	254227	256203	247924	1.01871	0.984881	0.99268	0.966283	1.02018	0.988994	1.01089	1.02542	1.03339
C08186	2.35183e+06	703715	686318	1.73417e+06	1.14298e+06	617878	1.47257e+06	1.72778e+06	1.32546e+06	1.51577e+06	1.41579e+06	1.49081e+06	1.31043e+06	1.32336	0.872217	0.471509	1.12373	1.31848	1.01147	1.15669	1.0804	1.13765
C08211	719625	173481	166864	483003	560685	576308	487211	540410	482454	557250	534579	521858	405937	1.18985	1.38121	1.4197	1.20022	1.33127	1.1885	1.37275	1.3169	1.28557
C08233	170740	162217	169210	149236	162472	174309	159181	149418	150544	146437	158050	154508	159553	0.935339	1.0183	1.09248	0.997667	0.936478	0.943537	0.917792	0.990577	0.968377
C08234	4.80168e+06	5.09957e+06	5.22698e+06	5.24734e+06	4.94923e+06	4.92102e+06	5.0062e+06	4.88119e+06	4.89724e+06	5.01119e+06	5.09091e+06	5.09394e+06	4.9981e+06	1.04987	0.990221	0.984577	1.00162	0.976609	0.97982	1.00262	1.01857	1.01918
C08257	1.11376e+06	1.18434e+06	1.12223e+06	1.21175e+06	1.17813e+06	1.18593e+06	1.17173e+06	1.18829e+06	1.12058e+06	1.17034e+06	1.16307e+06	1.13201e+06	1.14328e+06	1.05989	1.03048	1.0373	1.02489	1.03937	0.980144	1.02367	1.01731	0.990142
C08261	2.78507e+06	1.85315e+06	1.7225e+06	2.16689e+06	2.74062e+06	2.66731e+06	2.13961e+06	3.52179e+06	2.0843e+06	1.96259e+06	2.03439e+06	2.09347e+06	2.09522e+06	1.03421	1.30803	1.27305	1.02118	1.68087	0.99479	0.936699	0.970965	0.999165
C08262	572306	527480	520603	552813	533748	578217	516641	538321	518490	511985	561799	524757	545459	1.01348	0.978529	1.06005	0.947167	0.986912	0.950556	0.93863	1.02996	0.962046
C08272	821888	760377	761248	842484	813894	778894	768640	790545	787686	811290	759887	790397	779445	1.08088	1.0442	0.999293	0.986137	1.01424	1.01057	1.04086	0.974908	1.01405
C08277	432384	278073	286020	330907	412565	413985	320066	366193	299489	286024	294467	308926	321129	1.03045	1.28473	1.28915	0.996689	1.14033	0.932612	0.890681	0.916973	0.961997
C08278	941347	1.01815e+06	979769	1.06794e+06	955287	972986	968242	961029	966880	973686	980989	987150	974767	1.09558	0.980016	0.998173	0.993307	0.985906	0.991909	0.998891	1.00638	1.0127
C08280	314067	346710	334507	358720	312597	325493	632472	377400	373542	1.36242e+06	349912	1.58519e+06	467874	0.766702	0.668122	0.695685	1.3518	0.806627	0.798381	2.91194	0.747876	3.38807
C08292	1.24569e+06	698406	788701	766588	840384	819591	759384	697160	702038	791385	719593	826513	856360	0.89517	0.981344	0.957063	0.886758	0.814097	0.819792	0.924126	0.840292	0.965146
C08303	276159	201346	199815	258975	283575	272032	268297	263482	219328	251808	262975	253722	229995	1.126	1.23296	1.18278	1.16654	1.1456	0.95362	1.09484	1.14339	1.10316
C08306	2.33844e+08	2.75075e+08	2.76042e+08	1.94655e+08	1.91763e+08	2.02282e+08	2.48139e+08	2.38615e+08	2.48332e+08	2.47316e+08	2.49399e+08	2.48977e+08	2.59596e+08	0.749837	0.738697	0.779218	0.955865	0.919177	0.956608	0.952696	0.960717	0.959092
C08311	164062	154437	148449	153742	141468	148438	171204	134810	160766	167365	157584	139621	153105	1.00416	0.923994	0.969517	1.11822	0.880506	1.05004	1.09314	1.02925	0.911932
C08313	492335	511516	518488	603997	505183	488336	485141	464610	547689	526354	519436	495863	511164	1.18161	0.988299	0.955342	0.94909	0.908926	1.07145	1.02972	1.01618	0.970065
C08322	784747	240804	239601	595572	724838	739751	585367	658672	579837	630881	650657	629523	480798	1.23872	1.50757	1.53859	1.21749	1.36996	1.20599	1.31215	1.35329	1.30933
C08325	186471	195982	197208	199761	195827	195799	195339	193423	194766	189975	196103	195538	192089	1.03994	1.01946	1.01932	1.01692	1.00695	1.01394	0.988996	1.0209	1.01796
C08338	195922	197000	202558	214576	213388	200781	203050	201842	204138	199249	194656	197935	198570	1.08061	1.07462	1.01114	1.02256	1.01648	1.02804	1.00342	0.980291	0.996802
C08357	1.2207e+08	361110	336414	1.25014e+08	1.22258e+08	1.01517e+08	1.85555e+07	2.68955e+07	9.54697e+07	1.3276e+08	1.47094e+08	2.49634e+07	6.6013e+07	1.89378	1.85204	1.53783	0.281089	0.407427	1.44623	2.01113	2.22826	0.378159
C08362	1.45636e+06	690627	683129	1.02703e+06	1.18166e+06	1.21158e+06	1.09321e+06	1.21356e+06	964836	1.03047e+06	1.07169e+06	1.0705e+06	957023	1.07315	1.23472	1.26599	1.1423	1.26806	1.00816	1.07675	1.11981	1.11857
C08363	1.05199e+06	779828	750929	936391	1.00736e+06	961894	880772	947532	851683	871945	862620	912324	861964	1.08635	1.16868	1.11593	1.02182	1.09927	0.988072	1.01158	1.00076	1.05842
C08369	1.30827e+08	3.83572e+07	4.00023e+07	4.66276e+07	2.09642e+07	2.20037e+07	1.89762e+07	1.36841e+08	7.15424e+07	2.95258e+07	1.37847e+08	1.93954e+07	7.21669e+07	0.646108	0.290496	0.3049	0.262949	1.89618	0.991346	0.409132	1.91012	0.268757
C08370	614206	499667	481451	625440	637013	604792	624574	626921	508983	579173	634068	623348	530663	1.1786	1.20041	1.13969	1.17697	1.18139	0.959144	1.09141	1.19486	1.17466
C08401	800305	855179	881614	871929	818423	860824	876137	858798	881523	894624	859590	817867	843293	1.03396	0.970509	1.02079	1.03895	1.01839	1.04533	1.06087	1.01933	0.96985
C08402	213104	220850	218777	204258	240121	238790	189977	194710	169085	189425	216465	197676	205669	0.993139	1.16751	1.16104	0.923704	0.946715	0.822121	0.921018	1.0525	0.961139
C08415	657930	711607	679059	746406	667673	680043	676727	656240	675775	680532	685636	681574	675686	1.10466	0.988141	1.00645	1.00154	0.97122	1.00013	1.00717	1.01473	1.00871
C08430	683517	666072	694788	663514	693222	715722	653606	649256	622987	641726	654582	634417	653830	1.01481	1.06025	1.09466	0.999657	0.993004	0.952827	0.981488	1.00115	0.970309
C08433	524938	595419	583564	631940	538691	554378	582313	564196	579486	625110	591569	573127	572836	1.10318	0.940392	0.967778	1.01654	0.984918	1.01161	1.09126	1.0327	1.00051
C08437	1.14455e+06	1.22822e+06	1.20431e+06	1.30356e+06	1.1713e+06	1.14625e+06	1.20119e+06	1.327e+06	1.29956e+06	1.28947e+06	1.22028e+06	1.21004e+06	1.22336e+06	1.06556	0.957449	0.936968	0.981879	1.08472	1.06229	1.05404	0.997487	0.989112
C08441	1.75828e+06	5.8905e+06	4.32941e+06	1.52002e+06	1.74112e+06	1.70169e+06	1.0048e+07	1.34731e+07	9.25104e+06	1.34749e+07	1.02053e+07	1.49241e+07	6.25537e+06	0.242994	0.27834	0.272036	1.6063	2.15384	1.4789	2.15413	1.63144	2.38581
C08449	1.263e+07	384395	353319	921673	1.51141e+07	9.59605e+06	948447	1.07804e+06	901772	1.00509e+06	981753	1.04125e+06	3.59089e+06	0.25667	4.20901	2.67233	0.264126	0.300215	0.251128	0.2799	0.273401	0.289969
C08451	1.30044e+06	429249	390061	852135	1.1866e+06	878292	716214	976644	773161	771171	852507	898658	756994	1.12568	1.56752	1.16024	0.946129	1.29016	1.02136	1.01873	1.12617	1.18714
C08456	1.88089e+09	1.82338e+09	1.80065e+09	1.9029e+09	1.88388e+09	1.87641e+09	1.89567e+09	1.84792e+09	1.88493e+09	1.89966e+09	1.92341e+09	1.88598e+09	1.84589e+09	1.03088	1.02058	1.01653	1.02697	1.0011	1.02115	1.02913	1.042	1.02172
C08491	1.65104e+06	1.32128e+06	1.36172e+06	1.46358e+06	1.66812e+06	1.6228e+06	1.43669e+06	1.49808e+06	1.41634e+06	1.52677e+06	1.4356e+06	1.46993e+06	1.42761e+06	1.02519	1.16847	1.13673	1.00636	1.04936	0.99211	1.06946	1.0056	1.02965
C08497	1.40662e+06	979037	984379	1.4332e+06	1.68985e+06	1.49447e+06	1.10752e+06	1.08183e+06	1.11099e+06	1.34647e+06	1.22781e+06	1.33448e+06	1.17725e+06	1.21742	1.43542	1.26946	0.94077	0.918952	0.943722	1.14374	1.04296	1.13356
C08512	3.09408e+06	2.22031e+06	2.31883e+06	2.19138e+06	3.00229e+06	2.68467e+06	2.35353e+06	2.95998e+06	2.1066e+06	2.18789e+06	2.43379e+06	2.63332e+06	2.3989e+06	0.913497	1.25153	1.11913	0.98109	1.23389	0.878152	0.912041	1.01454	1.09772
C08536	188297	184224	178863	194774	191298	193477	186219	181878	188183	187997	187330	180643	184180	1.05752	1.03865	1.05048	1.01107	0.9875	1.02174	1.02072	1.0171	0.980798
C08560	148025	166988	168868	165880	158622	161748	166529	162504	168579	164653	158260	164360	161616	1.02638	0.981473	1.00082	1.0304	1.00549	1.04308	1.01879	0.979236	1.01697
C08567	227238	4.29644e+06	5.34443e+06	198141	249424	224442	358368	220184	208187	198461	179465	194680	2.09044e+06	0.0947847	0.119317	0.107366	0.171432	0.105329	0.0995901	0.0949377	0.0858506	0.093129
C08570	222184	161994	160762	1.61877e+06	228151	218864	215859	205193	1.51474e+07	1.84636e+06	211577	204133	2.10363e+06	0.769512	0.108456	0.104041	0.102613	0.0975424	7.20058	0.8777	0.100577	0.0970383
C08579	279416	316814	324742	308585	295966	311378	306113	305069	304205	300426	294369	302777	303915	1.01537	0.973844	1.02456	1.00723	1.0038	1.00095	0.988519	0.96859	0.996256
C08580	1.95868e+06	1.8045e+06	1.78191e+06	7.33503e+06	2.06473e+06	2.03383e+06	7.39392e+06	8.90312e+06	5.133e+06	7.75347e+06	7.97281e+06	8.84222e+06	3.15525e+06	2.3247	0.654378	0.644587	2.34337	2.82168	1.62681	2.45732	2.52684	2.80238
C08582	2.83488e+06	2.67841e+06	2.73927e+06	1.16743e+09	2.7431e+06	2.49124e+06	1.30053e+09	8.66721e+08	8.45809e+08	1.26132e+09	1.28101e+09	1.25723e+09	3.25269e+08	3.58914	0.00843334	0.00765902	3.99831	2.66463	2.60034	3.87777	3.9383	3.86521
C08588	230147	230310	238932	242171	240072	239116	241601	234648	235998	225445	228551	228980	231615	1.04558	1.03652	1.03239	1.04311	1.0131	1.01892	0.973361	0.986773	0.988625
C08592	118642	77202.6	75163.2	105834	126227	117633	103202	113111	97206.8	104853	110160	111394	93020.8	1.13775	1.35697	1.26459	1.10945	1.21598	1.045	1.1272	1.18425	1.19752
C08607	2.09597e+06	683676	635606	1.5399e+06	1.86766e+06	1.83475e+06	1.65511e+06	1.8906e+06	1.7589e+06	1.67098e+06	1.67084e+06	1.73281e+06	1.35652e+06	1.13519	1.3768	1.35254	1.22011	1.39371	1.29662	1.23181	1.23171	1.27739
C08610	7.53936e+06	383040	358201	5.07212e+06	1.01551e+07	6.34131e+06	4.09261e+06	5.87501e+06	2.93484e+06	4.80491e+06	3.74331e+06	4.3112e+06	3.2827e+06	1.54511	3.09351	1.93173	1.24672	1.78969	0.894031	1.46371	1.14031	1.31331
C08613	368800	218303	200279	281190	349897	347948	264783	328200	262595	256492	275530	268327	262277	1.07211	1.33407	1.32664	1.00955	1.25135	1.00121	0.977943	1.05053	1.02307
C08617	1.97928e+08	8.4233e+06	2.90949e+06	3.66868e+08	1.79313e+08	1.97145e+08	3.5755e+08	4.51358e+08	3.04118e+08	4.13933e+08	4.06383e+08	4.95513e+08	1.51518e+08	2.42128	1.18344	1.30113	2.35978	2.9789	2.00714	2.7319	2.68207	3.27031
C08630	426173	134170	133207	331392	405447	410230	336231	358784	327288	317215	377564	360946	269171	1.23116	1.50628	1.52405	1.24914	1.33292	1.21591	1.17849	1.40269	1.34095
C08659	601948	568724	577463	447456	582461	528981	454960	503508	452432	431623	496161	481568	541748	0.825947	1.07515	0.976434	0.839799	0.929413	0.835132	0.796722	0.915852	0.888914
C08661	218091	237523	230957	243006	233638	225968	229612	226775	241810	223762	223330	230579	229199	1.06024	1.01937	0.985905	1.0018	0.989423	1.05502	0.976278	0.974393	1.00602
C08668	705901	700676	714867	1.9314e+06	732565	673703	1.83176e+06	1.92396e+06	1.76812e+06	1.80371e+06	1.83449e+06	1.78952e+06	1.05748e+06	1.82642	0.692744	0.637082	1.73219	1.81938	1.672	1.70566	1.73477	1.69225
C08671	2.97226e+09	1.62445e+08	6.88367e+07	2.31336e+09	3.14733e+09	2.38744e+09	4.45006e+09	5.18454e+09	2.31353e+09	2.53456e+09	4.39208e+09	2.59395e+09	1.7925e+09	1.29058	1.75584	1.33191	2.48261	2.89236	1.29067	1.41398	2.45026	1.44712
C08673	230523	259297	245291	247303	239677	251580	249821	241182	248369	245500	228653	245870	243841	1.0142	0.982923	1.03174	1.02453	0.989099	1.01857	1.0068	0.937714	1.00832
C08675	609633	661306	614077	1.30805e+07	650368	583128	8.20567e+06	3.44995e+07	5.36744e+06	1.00356e+07	1.24419e+07	1.09606e+07	2.24597e+06	5.82399	0.28957	0.259633	3.6535	15.3606	2.38981	4.46828	5.53966	4.88012
C08684	254372	269444	265186	264573	269203	266929	256284	264207	272719	270540	258193	266332	262052	1.00962	1.02729	1.01861	0.97799	1.00822	1.0407	1.03239	0.985275	1.01633
C08688	329076	425529	397044	420217	354185	353539	405743	376802	400578	415940	383506	371640	384618	1.09256	0.920875	0.919195	1.05492	0.979678	1.0415	1.08144	0.99711	0.966258
C08692	331387	300300	305908	1.00487e+06	339320	336633	712029	891652	366938	1.12004e+06	1.12201e+06	1.21601e+06	408047	2.46264	0.83157	0.824985	1.74497	2.18517	0.899254	2.74488	2.74971	2.98008
C08694	251373	297165	295537	335148	284624	269880	295662	298265	307330	331526	313738	300162	290066	1.15542	0.981239	0.930406	1.01929	1.02827	1.05952	1.14293	1.08161	1.03481
C08702	621289	516812	528886	7.62868e+06	607229	634751	5.50959e+06	585966	7.12963e+06	9.45041e+06	1.72039e+06	5.27448e+06	3.88824e+06	1.96199	0.156171	0.163249	1.41699	0.150702	1.83364	2.43051	0.442461	1.35652
C08706	218495	243438	246179	241299	231242	235800	242769	343925	245758	240035	230715	239516	234949	1.02703	0.984225	1.00362	1.03329	1.46383	1.04601	1.02165	0.981981	1.01944
C08719	2.38671e+06	2.07589e+06	2.09154e+06	2.20721e+06	2.37398e+06	2.20544e+06	2.35874e+06	2.42421e+06	2.26132e+06	2.38552e+06	2.44282e+06	2.51571e+06	2.18442e+06	1.01043	1.08678	1.00962	1.0798	1.10977	1.0352	1.09206	1.11829	1.15166
C08726	3.88141e+06	3.84795e+06	3.72568e+06	3.93166e+06	3.95316e+06	3.93125e+06	3.50567e+06	3.38877e+06	3.13676e+06	3.53597e+06	3.56372e+06	3.70349e+06	3.6834e+06	1.0674	1.07324	1.06729	0.951748	0.920012	0.851595	0.959976	0.967508	1.00545
C08737	1.50189e+06	1.57446e+06	1.53162e+06	1.70316e+06	1.60926e+06	1.55255e+06	1.54593e+06	1.58e+06	1.58453e+06	1.63665e+06	1.65207e+06	1.60561e+06	1.53783e+06	1.10751	1.04645	1.00957	1.00527	1.02743	1.03037	1.06426	1.07429	1.04408
C08750	480489	448588	428474	461806	453976	452599	458492	9.74798e+06	452910	454205	461249	447804	454105	1.01696	0.999714	0.996684	1.00966	21.4663	0.997368	1.00022	1.01573	0.986123
C08752	3.80217e+06	3.64849e+06	3.67394e+06	3.51951e+06	3.67908e+06	3.52136e+06	3.65488e+06	4.31281e+06	3.67566e+06	3.74887e+06	3.79748e+06	3.47817e+06	3.64085e+06	0.966673	1.0105	0.967182	1.00385	1.18456	1.00956	1.02967	1.04302	0.955318
C08756	417828	341533	334824	375153	381665	369144	352780	364809	362735	347490	363199	345992	361330	1.03826	1.05628	1.02162	0.976337	1.00963	1.00389	0.961696	1.00517	0.957552
C08773	2.22657e+06	2.50155e+06	2.15148e+06	2.04764e+06	2.15449e+06	1.95667e+06	2.06338e+06	2.52561e+06	1.84744e+06	2.19536e+06	2.22383e+06	2.03683e+06	2.22334e+06	0.920973	0.969032	0.880058	0.928053	1.13595	0.830929	0.987413	1.00022	0.916113
C08775	1.00074e+06	1.20324e+06	1.12269e+06	1.23547e+06	1.02535e+06	1.00609e+06	1.14729e+06	1.10185e+06	1.1503e+06	1.17612e+06	1.08972e+06	1.10351e+06	1.11519e+06	1.10785	0.919439	0.902166	1.02878	0.988036	1.03148	1.05464	0.977162	0.989528
C08776	246937	237206	233505	249639	253219	251242	250568	244303	249849	245253	252806	240119	242167	1.03085	1.04564	1.03747	1.03469	1.00882	1.03172	1.01274	1.04393	0.991542
C08778	188937	192635	183097	195757	191744	179697	196633	215017	194491	195047	198072	192298	189354	1.03382	1.01262	0.948998	1.03844	1.13553	1.02713	1.03007	1.04604	1.01555
C08782	520034	502848	518660	454540	494854	530905	471977	455094	439068	468952	485553	494607	486700	0.933922	1.01675	1.09083	0.969749	0.93506	0.902132	0.963533	0.997643	1.01625
C08794	748729	671195	631117	701545	789477	770116	730292	831540	616855	698689	699937	696673	674240	1.0405	1.17091	1.1422	1.08313	1.2333	0.91489	1.03626	1.03811	1.03327
C08798	381531	348404	335134	513135	395634	378512	462257	571830	414820	455811	487929	596397	372780	1.37651	1.0613	1.01537	1.24003	1.53396	1.11277	1.22273	1.30889	1.59986
C08804	3.29028e+06	4.07803e+06	3.34023e+06	3.31409e+06	3.35447e+06	3.18688e+06	3.99053e+06	6.16866e+06	3.87539e+06	3.97963e+06	3.4757e+06	3.39584e+06	3.93554e+06	0.842094	0.852354	0.809771	1.01397	1.56742	0.984716	1.0112	0.883158	0.862866
C08807	528248	514673	528955	542385	521360	533149	545715	526577	537328	539197	535577	540351	520760	1.04153	1.00115	1.02379	1.04792	1.01117	1.03182	1.03541	1.02845	1.03762
C08809	547362	606403	618048	666822	566298	586351	597051	678814	602417	611486	605763	625715	604788	1.10257	0.936359	0.969515	0.987209	1.1224	0.99608	1.01108	1.00161	1.0346
C08810	226504	252856	265840	7.87216e+07	264574	263095	7.59555e+07	236208	5.58461e+07	6.10449e+07	272170	251218	1.75296e+07	4.49078	0.015093	0.0150086	4.33299	0.0134748	3.18582	3.48239	0.0155263	0.0143311
C08848	1.53561e+06	2.21811e+07	1.49767e+06	7.03756e+08	2.27917e+07	2.38721e+07	7.80786e+08	4.46697e+07	6.35502e+08	1.02209e+09	6.89174e+08	7.53029e+08	2.16694e+08	3.2477	0.105179	0.110165	3.60318	0.206142	2.93272	4.71675	3.18041	3.47508
C08849	1.12217e+06	1.25108e+06	1.24016e+06	1.22909e+06	1.15641e+06	1.23512e+06	1.23245e+06	1.20806e+06	1.24003e+06	1.25846e+06	1.20918e+06	1.1863e+06	1.19715e+06	1.02668	0.965973	1.03172	1.02949	1.00912	1.03582	1.05121	1.01005	0.990933
C08853	553741	650162	650664	660474	625192	648975	664221	643245	644808	653343	653939	641603	621902	1.06202	1.00529	1.04353	1.06805	1.03432	1.03683	1.05056	1.05151	1.03168
C08855	181743	188799	178150	172841	184443	172855	180299	204204	175828	191678	188674	183467	179466	0.963087	1.02773	0.963164	1.00464	1.13784	0.979729	1.06805	1.05131	1.02229
C08858	34935.3	31557	25512.1	38891.5	39851.7	40996.7	40021.2	38223	29202.9	37814.6	35831.5	40238.5	31228.4	1.24539	1.27614	1.3128	1.28156	1.22398	0.935139	1.2109	1.1474	1.28852
C08861	2.16828e+06	2.57226e+06	2.52028e+06	2.5301e+06	2.38636e+06	2.36054e+06	2.37905e+06	2.40184e+06	2.36129e+06	2.46366e+06	2.45467e+06	2.45613e+06	2.42518e+06	1.04326	0.983991	0.973346	0.980977	0.990376	0.973656	1.01587	1.01216	1.01276
C08862	418864	475102	465643	497690	429837	442355	464644	450189	462389	498794	472030	457315	455109	1.09356	0.94447	0.971974	1.02095	0.989188	1.016	1.09599	1.03718	1.00485
C08878	342265	394674	411480	439193	367409	350456	403004	2.44316e+06	430166	516318	688227	953838	395238	1.11121	0.92959	0.886696	1.01965	6.1815	1.08837	1.30635	1.7413	2.41333
C08879	1.26968e+06	1.29336e+06	1.28546e+06	1.3325e+06	1.46324e+06	1.36583e+06	1.28435e+06	1.25682e+06	1.68843e+06	1.52418e+06	1.59938e+06	1.58068e+06	1.28633e+06	1.03589	1.13753	1.0618	0.998456	0.977056	1.31259	1.1849	1.24337	1.22883
C08897	342849	413615	422308	457111	388201	368091	403255	448817	419170	452171	427910	418025	400905	1.1402	0.968313	0.918149	1.00586	1.11951	1.04556	1.12788	1.06736	1.0427
C08898	1.31001e+07	1.53438e+07	1.44036e+07	1.75272e+07	1.77175e+07	1.73528e+07	1.49619e+07	1.60645e+07	1.59968e+07	1.28025e+07	7.96352e+06	4.30761e+06	1.06512e+07	1.64556	1.66343	1.62919	1.40472	1.50823	1.50188	1.20198	0.747664	0.404425
C08899	784355	702538	719720	1.85659e+06	792551	815138	1.00938e+06	2.07203e+06	807521	1.01812e+06	1.52539e+06	1.63462e+06	764300	2.42915	1.03696	1.06652	1.32066	2.71101	1.05655	1.33209	1.9958	2.13871
C08953	180748	56481.2	56525.1	148739	198601	165390	156221	163413	139931	169448	157104	171672	115032	1.29303	1.72649	1.43778	1.35807	1.42059	1.21646	1.47305	1.36575	1.49239
C08954	573759	570090	561749	624156	612752	595512	602606	684576	577409	615759	617712	652198	573915	1.08754	1.06767	1.03763	1.04999	1.19282	1.00609	1.07291	1.07631	1.1364
C08966	1.9257e+06	1.58532e+06	1.56114e+06	1.54235e+06	2.07899e+06	1.89937e+06	1.55856e+06	1.64382e+06	1.63519e+06	1.5919e+06	1.5958e+06	1.57676e+06	1.66398e+06	0.926905	1.24941	1.14146	0.936646	0.987887	0.982702	0.956681	0.959029	0.947585
C08968	404421	442476	442578	443288	426309	438346	435127	439467	447854	433309	438606	446988	428193	1.03525	0.995602	1.02371	1.01619	1.02633	1.04592	1.01195	1.02432	1.04389
C08972	894494	936493	973331	926354	966124	817390	933475	1.09006e+06	864335	993182	1.00606e+06	885593	928838	0.997326	1.04014	0.880014	1.00499	1.17357	0.930555	1.06927	1.08314	0.953442
C08975	137556	154218	149190	382536	155223	128428	309882	380313	304922	338793	296306	330000	196781	1.94397	0.788812	0.652644	1.57476	1.93267	1.54955	1.72168	1.50577	1.67699
C08992	411966	443747	431770	445990	464193	438853	383047	375336	367362	391548	410703	405637	404382	1.10289	1.14791	1.08524	0.94724	0.928171	0.908453	0.968264	1.01563	1.0031
C08994	617872	665539	653922	668902	696203	658199	595988	596807	512940	587250	627618	639515	607850	1.10044	1.14535	1.08283	0.980486	0.981832	0.843859	0.96611	1.03252	1.05209
C08996	277649	302906	294028	309368	297442	287678	296526	288704	312123	306352	295273	293547	291920	1.05977	1.01892	0.985468	1.01578	0.988984	1.06921	1.04944	1.01148	1.00557
C08998	1.33379e+06	1.86066e+06	1.52403e+06	1.23128e+06	1.39286e+06	1.37495e+06	1.29358e+06	1.43872e+06	1.76458e+06	1.21196e+06	1.25718e+06	1.22129e+06	1.57252e+06	0.783001	0.885754	0.874362	0.822618	0.914914	1.12213	0.770711	0.799469	0.776645
C09000	2.56835e+06	1.84311e+06	1.88883e+06	2.41529e+06	3.07767e+06	3.98133e+06	2.00404e+06	1.83983e+06	1.90509e+06	2.26912e+06	2.06916e+06	2.24892e+06	2.12002e+06	1.13927	1.45172	1.87796	0.945289	0.867833	0.898618	1.07033	0.976009	1.0608
C09010	273754	225829	226442	243968	370861	245929	247926	315001	228319	232334	246725	247573	235958	1.03395	1.57173	1.04226	1.05072	1.33499	0.967624	0.984642	1.04563	1.04923
C09016	1.52526e+06	1.33042e+06	1.40963e+06	1.33215e+06	1.49242e+06	1.33406e+06	1.41858e+06	1.40546e+06	1.26639e+06	1.33003e+06	1.44049e+06	1.6008e+06	1.36456e+06	0.97625	1.0937	0.977648	1.03959	1.02997	0.928062	0.974694	1.05565	1.17313
C09018	586019	635691	590291	698943	625176	560541	1.58953e+06	696594	1.57183e+06	817652	884568	889156	925488	0.755215	0.675509	0.605671	1.7175	0.752677	1.69838	0.883481	0.955785	0.960742
C09020	3.24378e+06	1.09032e+08	1.02391e+08	6.60318e+06	3.13877e+06	2.85058e+06	9.34562e+06	2.27054e+07	7.11534e+06	3.19831e+06	8.05617e+06	2.64349e+07	4.61287e+07	0.143147	0.0680436	0.0617961	0.202599	0.492219	0.15425	0.0693344	0.174645	0.573069
C09038	713647	644865	613801	656297	690544	627141	647458	809493	545801	630390	617183	652834	655591	1.00108	1.05332	0.956603	0.987594	1.23475	0.832533	0.961559	0.941414	0.995794
C09055	1.38132e+06	445662	436972	1.11714e+06	1.31202e+06	1.38562e+06	1.20038e+06	1.23009e+06	1.17519e+06	1.15116e+06	1.24349e+06	1.04322e+06	921483	1.21233	1.42381	1.50369	1.30267	1.3349	1.27532	1.24925	1.34944	1.13211
C09056	115353	117723	120618	120891	126335	121201	126209	122347	126836	117670	116807	116464	117344	1.03023	1.07663	1.03287	1.07555	1.04264	1.0809	1.00278	0.995429	0.992501
C09078	942339	1.03368e+06	986395	3.32696e+06	937837	918903	6.40493e+06	1.04708e+07	3.26214e+06	2.46879e+06	2.22656e+06	7.256e+06	2.70636e+06	1.22931	0.346531	0.339535	2.36662	3.86896	1.20536	0.912218	0.822714	2.68109
C09086	8.97856e+07	307734	304217	2.98927e+06	6.10306e+07	6.01003e+07	4.95043e+06	3.07679e+07	4.14009e+06	3.97817e+06	6.3844e+06	3.8255e+06	2.56606e+07	0.116492	2.37838	2.34212	0.192919	1.19903	0.16134	0.15503	0.248802	0.149081
C09106	2.96633e+06	2.59406e+06	4.48457e+06	942504	1.19908e+07	1.9673e+07	703397	5.37665e+06	2.38051e+06	1.65533e+06	1.62654e+06	2.69307e+06	2.78453e+06	0.338478	4.30622	7.06509	0.252608	1.9309	0.854905	0.594473	0.584134	0.967154
C09130	487064	323299	337479	450720	554198	534734	382226	381039	379650	458513	409451	470910	401921	1.12141	1.37887	1.33045	0.950998	0.948045	0.944588	1.1408	1.01873	1.17165
C09160	842409	844854	783426	1.93605e+06	836212	842948	2.66068e+06	3.29593e+06	1.91121e+06	2.073e+06	2.02552e+06	2.39307e+06	1.24239e+06	1.55833	0.673068	0.67849	2.14158	2.6529	1.53833	1.66856	1.63034	1.92619
C09162	538338	581967	594685	595266	558738	587685	598139	586302	601816	610761	586843	558359	568131	1.04776	0.983466	1.03442	1.05282	1.03198	1.05929	1.07503	1.03294	0.982799
C09164	5.41989e+06	2.17527e+06	2.00316e+06	4.90772e+06	4.2029e+06	5.53752e+06	4.67301e+06	5.38244e+06	4.47419e+06	4.97063e+06	4.98491e+06	5.28664e+06	3.68837e+06	1.33059	1.1395	1.50135	1.26696	1.4593	1.21305	1.34765	1.35152	1.43333
C09167	977323	1.0861e+06	1.06181e+06	1.07135e+06	921733	959173	1.06665e+06	1.1368e+06	1.07559e+06	1.07645e+06	1.05808e+06	1.0601e+06	1.04702e+06	1.02323	0.880337	0.916095	1.01874	1.08575	1.02728	1.0281	1.01056	1.01249
C09180	3.22164e+06	3.99297e+06	3.27055e+06	1.5483e+08	3.11735e+06	2.95063e+06	1.27909e+08	1.35004e+08	9.6725e+07	1.34764e+08	1.49578e+08	1.44005e+08	3.88491e+07	3.98542	0.0802425	0.0759511	3.29245	3.47509	2.48976	3.46892	3.85024	3.70677
C09210	324153	251459	263921	321100	328215	332360	308154	327731	302368	296619	313239	304538	286486	1.12082	1.14566	1.16013	1.07563	1.14397	1.05544	1.03537	1.09338	1.06301
C09211	6.89371e+06	8.01782e+08	8.20483e+08	1.01178e+08	1.22299e+07	1.15418e+07	4.44597e+07	7.84476e+07	1.54021e+08	9.30125e+07	1.0455e+08	7.36738e+07	3.85673e+08	0.26234	0.0317104	0.0299263	0.115278	0.203404	0.399355	0.241169	0.271084	0.191026
C09229	294522	381548	646069	448434	483634	281214	277209	334185	255822	317042	248955	352634	390242	1.14912	1.23932	0.720614	0.710352	0.856353	0.655547	0.812424	0.637949	0.903628
C09241	485990	501300	503786	532716	490103	494378	394100	387547	445851	433837	423845	460124	474942	1.12164	1.03192	1.04092	0.829786	0.815987	0.938747	0.913452	0.892413	0.9688
C09246	924302	1.06773e+06	1.03777e+06	1.08582e+06	997144	1.03508e+06	1.05939e+06	1.05707e+06	1.02843e+06	1.04204e+06	1.04299e+06	1.02332e+06	1.00987e+06	1.07522	0.987403	1.02496	1.04904	1.04675	1.01838	1.03186	1.0328	1.01332
C09249	151995	42992.6	42255	2.07545e+06	842414	179144	6.67361e+06	3.22363e+06	3.15736e+06	162283	254389	3.41369e+06	881772	2.35372	0.955366	0.203163	7.56841	3.65586	3.5807	0.184042	0.288498	3.8714
C09250	1.11518e+06	1.09637e+06	1.11667e+06	1.14949e+06	1.12435e+06	1.12552e+06	1.15205e+06	1.11165e+06	1.13435e+06	1.13829e+06	1.16693e+06	1.14073e+06	1.11208e+06	1.03365	1.01104	1.01209	1.03595	0.999618	1.02003	1.02358	1.04933	1.02577
C09258	270150	241971	237435	697756	278073	280753	347654	713655	285165	540419	603711	722344	258420	2.70008	1.07605	1.08642	1.3453	2.7616	1.10349	2.09124	2.33616	2.79523
C09264	479343	314081	304576	333722	465122	415916	364615	444872	326359	329255	377048	384904	354183	0.942231	1.31323	1.1743	1.02946	1.25605	0.921443	0.929619	1.06456	1.08674
C09275	6.8053e+07	889667	906752	1.67644e+06	5.60952e+07	1.45899e+07	924921	1.50543e+06	905597	897124	926936	918000	1.76978e+07	0.0947259	3.16962	0.82439	0.0522619	0.0850632	0.05117	0.0506913	0.0523758	0.0518709
C09280	581828	564680	582519	608621	636300	566704	642070	589544	608124	629593	613037	592224	579336	1.05055	1.09833	0.978195	1.10829	1.01762	1.04969	1.08675	1.05817	1.02225
C09281	9.00247e+06	2.2928e+06	2.0553e+07	3.20641e+07	1.57745e+07	1.38686e+07	1.3304e+07	1.20872e+07	1.94863e+07	8.55154e+06	1.20451e+07	1.14121e+07	1.10184e+07	2.91005	1.43165	1.25868	1.20743	1.097	1.76852	0.776114	1.09318	1.03573
C09286	229760	239680	238953	245081	239156	244480	242196	236591	243250	236075	227993	236516	236643	1.03566	1.01062	1.03311	1.02346	0.999779	1.02792	0.997599	0.963446	0.99946
C09296	651574	672611	649108	673987	672885	669497	667963	642693	665130	650534	657395	642488	660105	1.02103	1.01936	1.01423	1.0119	0.973622	1.00761	0.985501	0.995894	0.973311
C09311	859661	831251	857389	791796	850041	877631	801464	796129	779927	775217	815230	817627	811502	0.975716	1.04749	1.08149	0.98763	0.981056	0.96109	0.955287	1.00459	1.00755
C09313	3.52505e+08	938961	2.4556e+06	5.35914e+07	3.66604e+08	3.31114e+06	1.24596e+08	1.82817e+08	1.03238e+08	1.6614e+08	1.69704e+08	1.63946e+06	1.22239e+08	0.438415	2.99908	0.0270874	1.01928	1.49557	0.844555	1.35914	1.3883	0.0134119
C09347	264402	223290	216520	238559	258423	222615	253026	244722	223835	238179	257960	286669	229685	1.03864	1.12512	0.969217	1.10162	1.06547	0.974532	1.03698	1.1231	1.2481
C09360	338102	313535	342613	304926	323755	363987	268974	297389	287060	277058	329040	342899	324035	0.941028	0.999137	1.12329	0.830076	0.91777	0.885891	0.855026	1.01545	1.05822
C09362	415688	406695	407883	429986	435080	433076	428327	406689	422505	415024	413552	420688	410422	1.04767	1.06008	1.0552	1.04363	0.990906	1.02944	1.01121	1.00763	1.02501
C09364	632652	611744	638890	557687	602019	645877	588669	552302	573973	570507	599954	601718	594834	0.93755	1.01208	1.08581	0.989635	0.928497	0.964929	0.959102	1.00861	1.01157
C09382	1.26417e+06	1.06771e+06	1.88736e+06	1.53175e+06	1.46259e+06	1.25896e+06	1.50122e+06	1.58237e+06	1.22881e+06	1.42553e+06	1.36576e+06	1.46023e+06	1.33116e+06	1.15068	1.09873	0.945756	1.12775	1.18872	0.923109	1.07089	1.02599	1.09696
C09417	477348	544731	519859	539835	498777	514381	513608	523775	527509	517012	525630	534992	517929	1.0423	0.963022	0.99315	0.991659	1.01129	1.0185	0.998229	1.01487	1.03294
C09420	3.00116e+06	2.83551e+06	2.89994e+06	3.90671e+08	2.904e+06	2.63736e+06	3.25712e+08	3.04276e+08	2.60291e+08	3.47157e+08	3.52522e+08	3.41911e+08	9.55229e+07	4.08981	0.0304011	0.0276098	3.40977	3.18537	2.72491	3.63428	3.69044	3.57937
C09421	4.63139e+06	358159	360580	2.73542e+06	4.53757e+06	4.23793e+06	1.35001e+06	1.26727e+06	626515	2.98228e+06	837432	1.18192e+06	1.54707e+06	1.76813	2.93301	2.73933	0.872623	0.819143	0.40497	1.9277	0.541304	0.763975
C09441	929575	841837	857555	3.0881e+06	994565	965870	2.31044e+06	2.49993e+06	1.60819e+06	3.13983e+06	3.14963e+06	3.40887e+06	1.29281e+06	2.38867	0.769307	0.747111	1.78715	1.93372	1.24395	2.42869	2.43627	2.6368
C09469	1.09866e+06	919980	909639	2.35107e+06	1.13561e+06	1.10895e+06	2.83891e+06	2.43164e+06	2.5036e+06	1.96624e+06	2.54474e+06	1.80664e+06	1.29451e+06	1.81619	0.877248	0.856658	2.19304	1.87842	1.93401	1.51891	1.96579	1.39561
C09478	526125	198335	206202	273154	612106	440838	266378	342494	245488	282976	298307	303323	300807	0.90807	2.03488	1.46552	0.885546	1.13858	0.8161	0.940724	0.991689	1.00836
C09529	150097	120026	124157	133766	183225	128111	124132	172713	125185	127387	135277	135743	128425	1.04158	1.42671	0.997551	0.966566	1.34485	0.974772	0.991915	1.05335	1.05698
C09563	415178	421786	420673	1.03214e+08	432452	472575	2.11921e+07	4.79238e+06	7.1467e+07	8.87977e+07	1.66078e+07	1.48294e+07	8.57833e+06	12.0319	0.0504122	0.0550894	2.47042	0.558661	8.33111	10.3514	1.93601	1.72871
C09570	3.20991e+06	3.10013e+06	3.15034e+06	3.15532e+06	3.49184e+06	3.33919e+06	3.12421e+06	3.1445e+06	3.2604e+06	3.28653e+06	3.23237e+06	3.16702e+06	3.18804e+06	0.989736	1.09529	1.04741	0.979978	0.986341	1.0227	1.03089	1.0139	0.993405
C09575	16349.4	19322.2	18590.8	19334.2	17370.8	16638.9	16813.1	17583.1	19115.6	19454.6	16703	16675.5	18387.9	1.05146	0.944688	0.904882	0.914357	0.956236	1.03958	1.05801	0.908373	0.906876
C09591	716749	338629	273646	476695	816123	790064	428534	442286	392721	458899	472635	438696	447923	1.06423	1.82201	1.76384	0.956713	0.987414	0.876758	1.0245	1.05517	0.9794
C09593	475523	348089	312538	432365	477445	502068	410426	405684	366470	437441	425481	466470	379736	1.13859	1.25731	1.32215	1.08082	1.06833	0.965064	1.15196	1.12046	1.22841
C09622	633895	660790	632592	671938	654178	673945	693869	658463	658545	678696	645055	636379	644022	1.04335	1.01577	1.04646	1.0774	1.02242	1.02255	1.05384	1.0016	0.988133
C09627	589749	654098	607384	5.78345e+06	643279	584890	2.97076e+06	4.90865e+06	1.59712e+06	856249	1.39316e+06	1.15301e+07	948978	6.0944	0.677865	0.616337	3.13048	5.17256	1.68299	0.902286	1.46807	12.15
C09654	3.22008e+06	3.19458e+06	3.2807e+06	3.18354e+06	3.06976e+06	3.34733e+06	3.18044e+06	3.20504e+06	3.07607e+06	3.13319e+06	3.11746e+06	3.20993e+06	3.21014e+06	0.991711	0.956267	1.04274	0.990747	0.998409	0.958235	0.976027	0.971128	0.999933
C09661	354272	387608	387698	388319	372493	374099	381171	384973	378764	379578	384218	391561	374832	1.03598	0.99376	0.998044	1.01691	1.02705	1.01049	1.01266	1.02504	1.04463
C09675	769314	723754	759664	1.36865e+06	784837	731114	6.25776e+06	880491	2.82432e+06	5.1699e+06	5.21566e+06	5.44537e+06	967817	1.41416	0.810936	0.755426	6.46585	0.90977	2.91824	5.34181	5.38909	5.62645
C09680	486521	397203	398282	429106	652295	441354	448950	585292	425447	417407	469353	435879	418153	1.02619	1.55994	1.05548	1.07365	1.39971	1.01744	0.998214	1.12244	1.04239
C09707	440334	440805	437102	2.34211e+06	1.04929e+06	1.09931e+06	2.10074e+06	4.12056e+06	1.7218e+06	2.61595e+06	2.58742e+06	3.25793e+06	1.01541e+06	2.30658	1.03337	1.08263	2.06887	4.05805	1.69568	2.57626	2.54817	3.2085
C09715	891311	693270	667995	867774	915249	877994	866573	869829	707887	812717	879746	864873	757018	1.14631	1.20902	1.15981	1.14472	1.14902	0.9351	1.07358	1.16212	1.14247
C09724	807502	858670	837894	908206	849182	828724	800849	820922	1.34632e+06	780266	807326	816431	1.02081e+06	0.889695	0.831874	0.811833	0.784526	0.80419	1.31888	0.764363	0.790871	0.79979
C09766	7.33077e+06	230038	230663	248515	1.50992e+07	323355	5.01465e+06	8.57869e+06	232574	236664	3.11003e+06	4.42964e+06	2.00333e+06	0.124051	7.53706	0.161408	2.50315	4.28221	0.116093	0.118135	1.55243	2.21113
C09780	1.42358e+06	905364	881110	1.16147e+06	1.3678e+06	1.26323e+06	1.17478e+06	1.19477e+06	1.02581e+06	1.12379e+06	1.13254e+06	1.26848e+06	1.07526e+06	1.08018	1.27207	1.17482	1.09256	1.11115	0.954013	1.04514	1.05327	1.1797
C09795	1.06526e+06	859349	770633	867149	1.0206e+06	961735	919232	951534	884945	852407	848403	861324	889946	0.974384	1.14681	1.08067	1.03291	1.0692	0.99438	0.957818	0.953319	0.967838
C09801	7.61892e+06	1.18995e+06	1.1142e+06	3.47325e+06	7.80224e+06	1.76406e+07	3.35387e+06	7.80295e+06	3.8244e+06	5.68907e+06	3.33251e+06	3.47478e+06	3.41494e+06	1.01707	2.28473	5.1657	0.982115	2.28494	1.1199	1.66593	0.97586	1.01752
C09808	1.09062e+06	984568	950012	1.14831e+06	1.08837e+06	1.0364e+06	1.09515e+06	1.19111e+06	1.00683e+06	995819	1.11659e+06	1.11048e+06	1.00753e+06	1.13973	1.08023	1.02865	1.08697	1.1822	0.999305	0.988376	1.10825	1.10218
C09815	364949	240289	214704	371844	421392	382583	287345	280681	277894	299918	298912	313769	289590	1.28403	1.45513	1.32112	0.992248	0.969236	0.959612	1.03566	1.03219	1.08349
C09829	171200	161761	150716	6.29234e+06	183689	173482	3.63777e+06	2.84203e+06	2.71187e+06	2.98655e+06	3.576e+06	2.96822e+06	972771	6.46847	0.188831	0.178338	3.73959	2.92158	2.78778	3.07015	3.6761	3.05131
C09866	1.65216e+06	1.79729e+06	1.80855e+06	1.88169e+06	1.69078e+06	1.65461e+06	1.77455e+06	1.91553e+06	1.87592e+06	1.86136e+06	1.80493e+06	1.7923e+06	1.78369e+06	1.05494	0.947909	0.927631	0.994876	1.07391	1.05171	1.04354	1.01191	1.00483
C09870	998920	902642	859162	918645	966582	877833	906272	1.13308e+06	763979	882381	863895	913797	917656	1.00108	1.05332	0.956603	0.987594	1.23475	0.832533	0.961559	0.941414	0.995794
C09874	155894	77132.1	65336	177970	181706	117577	184031	188922	177574	190990	189071	217292	120475	1.47723	1.50824	0.975942	1.52754	1.56813	1.47395	1.5853	1.56937	1.80362
C09910	616849	495927	560044	544342	596743	581978	539226	490715	498506	561949	510971	543305	541164	1.00587	1.1027	1.07542	0.99642	0.906777	0.921174	1.03841	0.944208	1.00396
C09916	699456	514440	528124	5.92379e+07	704439	698869	7.85409e+06	1.85445e+07	4.61077e+06	1.4991e+07	4.06045e+07	8.34167e+07	2.9487e+06	20.0895	0.238898	0.237009	2.66357	6.28905	1.56366	5.08392	13.7703	28.2893
C09926	209427	193219	191170	200133	200540	225460	183458	172063	177810	168674	199576	205214	197069	1.01555	1.01761	1.14407	0.930933	0.873112	0.902274	0.855915	1.01272	1.04133
C09929	256365	272981	271971	267056	253629	276954	281560	267641	268446	287501	262913	262834	264428	1.00994	0.95916	1.04737	1.06479	1.01215	1.01519	1.08725	0.994269	0.993971
C09930	409356	259827	267939	296834	413711	343088	312867	407881	290229	292861	320254	337740	303508	0.978013	1.3631	1.13041	1.03084	1.34389	0.95625	0.964922	1.05517	1.11279
C09940	66351.6	56355.8	57740.6	219606	68255.4	68041.8	164916	169185	114790	208438	205115	222686	90766.9	2.41945	0.751985	0.749632	1.81692	1.86395	1.26467	2.29641	2.25979	2.45338
C09948	564193	520801	535297	564139	642053	597487	575123	2.80939e+06	546509	549704	560835	608863	537672	1.04923	1.19414	1.11125	1.06965	5.2251	1.01644	1.02238	1.04308	1.13241
C09951	2.89678e+06	2.8192e+06	2.70894e+06	2.94328e+06	2.87594e+06	2.85963e+06	2.82959e+06	2.78688e+06	2.7054e+06	2.80658e+06	2.80582e+06	2.85393e+06	2.78511e+06	1.05679	1.03261	1.02676	1.01597	1.00064	0.97138	1.00771	1.00744	1.02471
C09953	451222	436310	455671	397755	429374	460654	419852	393914	409370	406899	427900	429159	424249	0.93755	1.01208	1.08581	0.989635	0.928497	0.964929	0.959102	1.00861	1.01157
C09954	843003	779912	771872	864129	834803	798905	794008	810854	807922	832132	826939	810703	797808	1.08313	1.04637	1.00138	0.995237	1.01635	1.01268	1.04302	1.03651	1.01616
C09955	3.55708e+06	3.57826e+06	3.82005e+06	3.69949e+06	3.73323e+06	3.6778e+06	3.75522e+06	3.76266e+06	3.77692e+06	3.51215e+06	3.52864e+06	3.46056e+06	3.62277e+06	1.02118	1.03049	1.01519	1.03656	1.03861	1.04255	0.969464	0.974015	0.955224
C09956	374557	372629	377476	408409	369769	414173	375041	368848	386896	393796	378802	377246	376305	1.08531	0.982632	1.10063	0.996642	0.980185	1.02815	1.04648	1.00664	1.0025
C09978	261168	251557	258657	383850	262543	269570	389763	775766	351236	385156	394332	457742	295745	1.29791	0.887733	0.911493	1.3179	2.62309	1.18763	1.30232	1.33335	1.54776
C09983	347527	286687	287466	309714	470804	312204	314739	399890	289848	294945	313214	314291	299546	1.03395	1.57173	1.04226	1.05072	1.33499	0.967624	0.984642	1.04563	1.04923
C09996	241233	257796	248809	254972	249524	257356	246335	249309	258103	255164	257553	259035	250122	1.01939	0.997611	1.02892	0.984859	0.99675	1.03191	1.02016	1.02971	1.03563
C09999	864212	706554	642050	1.43072e+06	878364	970462	1.29427e+06	1.66016e+06	1.31132e+06	1.40819e+06	1.42844e+06	1.47921e+06	934685	1.5307	0.939743	1.03828	1.38471	1.77617	1.40295	1.50659	1.52826	1.58258
C10004	534518	745662	555986	459710	558191	551012	464203	553512	491456	481134	503816	489432	573712	0.801291	0.972946	0.960433	0.809122	0.96479	0.856625	0.838634	0.878168	0.853097
C10007	187097	199926	206106	203475	190916	191881	193282	189537	188977	188392	193442	186824	197147	1.0321	0.968392	0.973286	0.980395	0.961399	0.958559	0.955589	0.981208	0.947638
C10009	9.55711e+06	7.50012e+06	2.08341e+06	1.27477e+07	1.0158e+07	1.50712e+06	1.33177e+07	2.26083e+06	4.4394e+06	1.11849e+07	3.13957e+06	1.05846e+07	7.1662e+06	1.77886	1.41749	0.210309	1.85841	0.315485	0.619492	1.56078	0.438108	1.47702
C10015	594071	658891	611834	1.79859e+07	647993	589176	1.32866e+07	4.7586e+07	9.54057e+06	1.26413e+07	1.59849e+07	1.46551e+07	3.18748e+06	5.64267	0.203293	0.184841	4.16839	14.929	2.99314	3.96593	5.01491	4.59772
C10053	307585	201540	195441	212743	296108	266885	233967	227984	209418	210287	241945	246986	227272	0.936071	1.30288	1.1743	1.02946	1.00313	0.921443	0.925266	1.06456	1.08674
C10072	233961	250492	243443	250008	238483	243758	252992	245669	243881	233987	244917	247680	241021	1.03729	0.989468	1.01135	1.04966	1.01928	1.01186	0.970813	1.01616	1.02763
C10074	437717	448365	454399	449330	506481	514493	453851	481607	457591	458267	469701	464249	449935	0.998654	1.12568	1.14348	1.0087	1.07039	1.01702	1.01852	1.04393	1.03181
C10080	285803	279620	280437	295634	290357	293664	282648	276059	285630	285347	284334	274185	281046	1.05191	1.03313	1.0449	1.0057	0.982257	1.01631	1.0153	1.0117	0.97559
C10094	799348	896786	897478	911010	882093	895148	916178	914171	889401	901173	901995	884980	867441	1.05023	1.01689	1.03194	1.05618	1.05387	1.02532	1.03889	1.03983	1.02022
C10129	426542	314420	314835	415279	437998	420169	414400	416262	338764	388931	406179	413890	357132	1.16281	1.22643	1.17651	1.16035	1.16557	0.948567	1.08904	1.13734	1.15893
C10138	759031	680652	709859	807227	758117	748126	706285	728457	749698	688978	755624	716848	705797	1.14371	1.07413	1.05997	1.00069	1.03211	1.0622	0.976169	1.0706	1.01566
C10139	562965	586932	573975	624600	574204	623817	611495	641583	620845	669073	624002	641138	588607	1.06115	0.975529	1.05982	1.03888	1.09	1.05477	1.1367	1.06013	1.08924
C10166	223443	173335	181925	209623	226243	229101	212415	225910	205606	204464	215920	209923	197479	1.06149	1.14566	1.16013	1.07563	1.14397	1.04115	1.03537	1.09338	1.06301
C10172	767342	409720	386435	588618	993314	1.01672e+06	515291	523600	519151	602664	580979	597297	540780	1.08846	1.83682	1.88009	0.952866	0.968231	0.960005	1.11443	1.07433	1.10451
C10217	379092	366564	378090	331348	360736	387016	344059	330945	320069	341854	353956	360556	354792	0.933922	1.01675	1.09083	0.969749	0.932787	0.902132	0.963533	0.997643	1.01625
C10280	555798	621997	628720	695622	607916	605527	692719	652771	708119	673531	641615	713956	625704	1.11174	0.971571	0.967753	1.1071	1.04326	1.13172	1.07644	1.02543	1.14104
C10285	178241	177333	176054	823139	498942	202882	850352	1.40804e+06	696963	1.0082e+06	1.02677e+06	1.00942e+06	407649	2.01923	1.22395	0.497688	2.08599	3.45404	1.70971	2.4732	2.51875	2.4762
C10306	1.24927e+07	619565	646340	3.88913e+07	1.12318e+07	2.99694e+07	3.5723e+07	5.67191e+07	2.43316e+07	3.91097e+07	4.08973e+07	4.76838e+07	1.24524e+07	3.1232	0.901976	2.40672	2.86876	4.55488	1.95397	3.14074	3.2843	3.82929
C10313	615878	675487	632272	612586	693956	656074	585575	571053	544258	549225	625592	628138	625788	0.978904	1.10893	1.0484	0.935741	0.912534	0.869717	0.877654	0.999687	1.00376
C10333	554415	374321	367544	385988	537967	481054	421719	452283	377472	380821	436100	471853	415973	0.927914	1.29327	1.15645	1.01381	1.08729	0.907442	0.915494	1.04838	1.13433
C10350	1.37978e+06	1.53334e+06	1.49906e+06	1.56811e+06	1.41563e+06	1.35415e+06	1.50589e+06	1.60493e+06	1.56294e+06	1.51972e+06	1.49379e+06	1.49664e+06	1.47818e+06	1.06084	0.957685	0.916095	1.01874	1.08575	1.05734	1.0281	1.01056	1.01249
C10375	378591	312313	313161	337398	512888	340111	342873	435636	315756	321309	341211	342385	326321	1.03395	1.57173	1.04226	1.05072	1.33499	0.967624	0.984642	1.04563	1.04923
C10387	298151	211707	218317	235009	291583	260100	254924	332341	236305	237012	250787	256019	238450	0.985569	1.22283	1.09079	1.06909	1.39376	0.991005	0.993971	1.05174	1.07368
C10391	2.53497e+06	269617	263887	294957	1.59455e+06	1.48319e+06	271700	264756	255007	268726	275077	274289	831226	0.354846	1.91831	1.78434	0.326866	0.318512	0.306784	0.323289	0.330929	0.329981
C10406	442979	359850	387253	399683	432962	400255	396889	377045	371459	399046	410302	420004	385335	1.03723	1.1236	1.03872	1.02998	0.978486	0.963989	1.03558	1.06479	1.08997
C10409	1.12744e+06	1.01781e+06	1.01219e+06	1.18708e+06	1.09914e+06	1.07139e+06	1.13213e+06	1.2237e+06	1.04082e+06	1.09962e+06	1.15429e+06	1.14797e+06	1.04656e+06	1.13427	1.05023	1.02372	1.08176	1.16926	0.994514	1.05069	1.10293	1.0969
C10426	51924.3	60384	58802.3	63861.6	56706.7	55014.6	53085.2	55372.4	61460.8	62492.8	54268.5	54121.8	57656.1	1.10763	0.983534	0.954186	0.920722	0.960391	1.06599	1.08389	0.941246	0.938701
C10434	422444	268134	276506	306325	426938	354057	322870	420922	299509	302225	330493	348538	313212	0.978013	1.3631	1.13041	1.03084	1.34389	0.95625	0.964922	1.05517	1.11279
C10487	456342	433562	452254	398869	434246	465881	425448	399355	402365	391386	426083	412958	426601	0.934993	1.01792	1.09208	0.997298	0.936132	0.943188	0.917453	0.998787	0.968019
C10511	2.40789e+06	3.42126e+06	2.85041e+06	3.42863e+06	1.92406e+06	1.11895e+07	9.34752e+07	2.56004e+06	3.48365e+06	3.55585e+06	2.84589e+06	2.30197e+06	3.35565e+06	1.02175	0.57338	3.33452	27.8561	0.762906	1.03815	1.05966	0.848091	0.686
C10523	282485	296302	308211	317697	299645	290618	302534	310754	306733	298397	310889	302520	295113	1.07653	1.01536	0.984769	1.02515	1.053	1.03937	1.01113	1.05346	1.0251
C10526	300876	286119	297687	292071	305148	282130	282001	276130	280053	291034	274647	265516	285806	1.02192	1.06768	0.987138	0.98669	0.966147	0.979872	1.01829	0.960957	0.92901
C10544	5.56257e+06	219169	209307	331764	2.76568e+06	581549	2.76709e+06	6.39559e+06	298322	306082	2.33704e+06	2.21114e+06	1.58509e+06	0.209304	1.74481	0.366888	1.7457	4.03485	0.188205	0.193101	1.47439	1.39497
C10556	297976	225919	202014	265725	282896	279954	247689	240196	234936	246867	245664	251864	239641	1.10885	1.1805	1.16822	1.03358	1.00232	0.980365	1.03015	1.02513	1.05101
C10559	209606	218240	201973	212367	213761	207228	202829	209672	203643	209441	202471	203232	207877	1.0216	1.0283	0.996877	0.975714	1.00863	0.979633	1.00752	0.973991	0.977652
C10560	535657	575290	581998	599141	555445	570891	581642	585664	560914	587609	569637	581370	565492	1.0595	0.982233	1.00955	1.02856	1.03567	0.991905	1.03911	1.00733	1.02808
C10562	1.29721e+06	1.10633e+06	1.08724e+06	1.1057e+06	1.21732e+06	1.24339e+06	1.07269e+06	1.14483e+06	1.07463e+06	1.06932e+06	1.07791e+06	1.11056e+06	1.15271e+06	0.959214	1.05605	1.07867	0.930584	0.993164	0.932263	0.927657	0.935112	0.963437
C10565	187619	198241	195161	222553	203690	199676	189936	195615	207808	212280	198980	182058	195525	1.13823	1.04176	1.02123	0.971414	1.00046	1.06282	1.08569	1.01767	0.931123
C10582	360307	430633	450443	454240	412175	396761	400069	416046	432374	429216	415098	443340	412674	1.10072	0.99879	0.961439	0.969456	1.00817	1.04774	1.04008	1.00587	1.07431
C10586	2.64851e+06	712544	725148	1.8983e+06	2.30141e+06	2.25465e+06	1.93918e+06	2.05068e+06	1.78462e+06	2.09012e+06	2.02557e+06	2.17026e+06	1.55874e+06	1.21784	1.47645	1.44645	1.24406	1.31559	1.14491	1.3409	1.29949	1.39231
C10597	301955	344741	349926	346683	299316	326889	350051	349020	315657	341118	328691	363859	336409	1.03054	0.889736	0.9717	1.04055	1.03749	0.938312	1.014	0.977056	1.0816
C10646	782633	484794	482800	638535	751967	694479	645851	656845	563953	617821	622629	697366	587635	1.08662	1.27965	1.18182	1.09907	1.11778	0.9597	1.05137	1.05955	1.18674
C10654	258255	200340	210268	242281	261491	264794	245509	261106	237639	236318	249560	242628	228246	1.06149	1.14566	1.16013	1.07563	1.14397	1.04115	1.03537	1.09338	1.06301
C10668	1.97396e+06	1.97082e+06	1.90022e+06	2.05592e+06	2.01352e+06	2.0021e+06	1.98107e+06	1.92411e+06	1.96925e+06	1.97722e+06	1.96443e+06	1.99811e+06	1.93142e+06	1.06446	1.04251	1.0366	1.02571	0.996215	1.01958	1.02371	1.01709	1.03453
C10693	3.97744e+06	768149	771420	1.2854e+06	3.95788e+06	3.13237e+06	1.09525e+06	1.39705e+06	935343	1.13579e+06	1.09696e+06	1.25263e+06	1.61633e+06	0.795254	2.44868	1.93795	0.677617	0.864331	0.578682	0.702695	0.67867	0.774979
C10700	383024	449829	372992	318548	394701	361854	321525	322574	282862	351307	342779	346297	371006	0.858606	1.06387	0.975331	0.86663	0.869457	0.762418	0.946902	0.923916	0.9334
C10702	2.43798e+06	2.50514e+06	2.46055e+06	2.5476e+06	2.47785e+06	2.44298e+06	2.48559e+06	2.48014e+06	2.47629e+06	2.47374e+06	2.57169e+06	2.46743e+06	2.46573e+06	1.0332	1.00492	0.990775	1.00805	1.00584	1.00428	1.00325	1.04297	1.00069
C10730	244741	258817	252619	257262	259837	254289	264481	256702	265169	255907	259386	258965	252744	1.01788	1.02806	1.00611	1.04644	1.01566	1.04916	1.01252	1.02628	1.02462
C10736	1.94692e+09	2.05359e+09	2.03549e+09	2.16561e+09	2.11267e+09	2.12432e+09	2.00013e+09	2.01708e+09	2.04996e+09	2.10064e+09	2.18521e+09	2.26931e+09	2.01288e+09	1.07587	1.04957	1.05536	0.993668	1.00209	1.01842	1.0436	1.08561	1.1274
C10784	460818	489597	486597	485546	491076	496301	488194	500840	484134	499796	468804	470828	476328	1.01935	1.03096	1.04193	1.02491	1.05146	1.01639	1.04927	0.984204	0.988453
C10798	740054	478109	439458	1.14637e+06	761865	736051	1.17968e+06	1.34086e+06	1.12162e+06	1.25013e+06	1.2211e+06	1.2951e+06	724056	1.58327	1.05222	1.01657	1.62926	1.85188	1.54908	1.72656	1.68647	1.78867
C10807	691940	759011	703508	6.05697e+06	688634	650897	7.11954e+06	4.80243e+06	3.38548e+06	3.50199e+06	6.11464e+06	3.38419e+06	1.66301e+06	3.64218	0.414089	0.391397	4.28112	2.88779	2.03576	2.10582	3.67685	2.03498
C10810	1.20624e+06	1.05281e+06	1.05772e+06	1.11941e+06	1.20399e+06	1.11851e+06	1.19416e+06	1.05605e+06	1.0877e+06	1.20984e+06	1.23795e+06	1.24067e+06	1.10345e+06	1.01446	1.09111	1.01365	1.0822	0.957039	0.985726	1.09642	1.12189	1.12435
C10811	575327	579310	581364	1.33087e+06	583798	616335	1.20141e+06	1.39925e+06	1.07732e+06	1.28821e+06	1.30546e+06	1.35332e+06	746438	1.78296	0.782112	0.825701	1.60952	1.87457	1.44328	1.72581	1.74892	1.81304
C10820	8.09165e+07	5.35774e+06	1.47873e+07	2.38831e+09	5.10816e+07	9.95011e+07	2.41578e+09	2.6867e+09	2.2797e+09	2.51353e+09	2.47708e+09	2.4435e+09	7.93562e+08	3.00961	0.06437	0.125385	3.04422	3.38562	2.87275	3.1674	3.12147	3.07915
C10831	3.90914e+09	3.5537e+08	7.71504e+07	3.24027e+09	4.66027e+09	4.16576e+09	6.61697e+09	8.22663e+09	3.56099e+09	3.96785e+09	4.03269e+09	6.91594e+09	2.29406e+09	1.41246	2.03145	1.81589	2.8844	3.58607	1.55227	1.72962	1.75789	3.01472
C10840	3.4559e+10	8.5405e+07	3.69248e+07	1.58442e+10	2.17858e+10	2.08241e+10	1.30367e+10	4.16349e+10	1.44743e+10	1.83821e+10	3.55592e+10	1.8333e+10	1.53363e+10	1.03312	1.42054	1.35783	0.850056	2.7148	0.943793	1.1986	2.31863	1.1954
C10869	1.12763e+06	319717	317422	813721	990336	978803	842291	880370	779903	855002	899707	862207	673806	1.20765	1.46976	1.45265	1.25005	1.30656	1.15746	1.26891	1.33526	1.27961
C10876	3.15045e+06	3.90472e+06	3.19827e+06	9.97783e+06	3.21191e+06	3.05145e+06	5.40308e+06	5.9065e+06	6.92126e+06	5.30709e+06	7.53915e+06	3.25153e+06	3.99778e+06	2.49584	0.803424	0.763285	1.35152	1.47744	1.73128	1.32751	1.88583	0.813333
C10921													#DIV/0!	#DIV/0!	#DIV/0!	#DIV/0!	#DIV/0!	#DIV/0!	#DIV/0!	#DIV/0!	#DIV/0!	#DIV/0!
C10923	1.69341e+06	7.9029e+06	3.03274e+06	1.12594e+06	1.03438e+06	1.49692e+06	1.15131e+06	3.20799e+06	1.81967e+06	1.4964e+06	828902	1.73262e+06	3.07031e+06	0.366719	0.336899	0.487549	0.374983	1.04484	0.592668	0.487379	0.269974	0.564314
C10928	509396	520022	499964	553811	557100	549754	484250	478518	492298	521504	533786	501735	503800	1.09927	1.1058	1.09122	0.961195	0.949818	0.977171	1.03514	1.05952	0.995901
C10931	2.57148e+06	2.50172e+06	2.40392e+06	3.25465e+06	3.45591e+06	3.06236e+06	3.45633e+06	3.44469e+06	2.6824e+06	2.26669e+06	1.86799e+06	1.70383e+06	2.23556e+06	1.45586	1.54589	1.36984	1.54607	1.54087	1.19988	1.01393	0.835583	0.762149
C10933	286463	325333	310592	328445	315187	294825	268572	244873	237462	292761	290940	302958	296278	1.10857	1.06382	0.995096	0.906489	0.826498	0.801486	0.98813	0.981984	1.02255
C10942	3.60462e+06	4.11737e+06	2.99976e+06	6.06461e+06	9.52866e+06	2.92061e+06	3.70982e+06	4.3536e+06	8.68595e+06	3.01367e+06	5.80747e+06	1.62245e+06	3.18198e+06	1.90592	2.99457	0.917858	1.16588	1.3682	2.72973	0.947104	1.82511	0.509886
C10947	1.7604e+06	1.19892e+06	1.19363e+06	1.61911e+06	2.22968e+06	1.96741e+06	1.54733e+06	1.55428e+06	1.31939e+06	1.47924e+06	1.52348e+06	1.58526e+06	1.40011e+06	1.15642	1.5925	1.40518	1.10515	1.11011	0.942346	1.05651	1.08811	1.13224
C10948	878479	570030	537772	807975	1.11266e+06	981784	747091	729474	658407	738173	760251	761230	681978	1.18475	1.63152	1.43961	1.09548	1.06964	0.965437	1.0824	1.11477	1.11621
C10949	165743	168320	169243	181064	176368	172487	174472	169959	167701	162654	164121	159851	167024	1.08406	1.05594	1.03271	1.04459	1.01757	1.00405	0.973836	0.982618	0.957054
C10959	429488	350640	351592	378804	575829	1.45351e+07	396322	516680	367376	368475	389891	384782	369135	1.02619	1.55994	39.3762	1.07365	1.39971	0.995235	0.998214	1.05623	1.04239
C10964	447398	291829	313110	411687	476130	453403	362749	337905	334032	369696	391687	436906	365317	1.12693	1.30333	1.24112	0.99297	0.924963	0.914361	1.01199	1.07218	1.19596
C10970	514188	604020	595713	644152	542931	548585	621964	579605	614047	637595	587878	576081	572702	1.12476	0.948016	0.957889	1.08602	1.01205	1.07219	1.11331	1.0265	1.0059
C10985	447353	480487	458667	491467	461308	485207	482993	469298	496874	463830	476615	454948	464247	1.05863	0.99367	1.04515	1.04038	1.01088	1.07028	0.999102	1.02664	0.979969
C10997	1.81873e+06	4.79226e+07	4.59851e+07	2.2596e+06	1.95295e+06	1.76231e+06	5.69599e+06	5.72079e+06	9.05013e+06	7.76297e+06	7.76082e+06	7.03768e+06	2.25411e+07	0.100243	0.0866394	0.078182	0.252693	0.253793	0.401494	0.344392	0.344296	0.312215
C11001	1.24041e+08	1.33654e+08	1.35154e+08	1.00775e+08	1.00675e+08	1.06789e+08	1.2607e+08	1.2749e+08	1.25993e+08	1.27236e+08	1.28022e+08	1.23667e+08	1.30162e+08	0.774232	0.77346	0.820434	0.968565	0.979475	0.967973	0.97752	0.983564	0.9501
C11014	358604	379265	368150	343717	404066	382009	340960	332504	284529	332804	364260	353121	348934	0.985048	1.158	1.09479	0.977146	0.952912	0.815423	0.953771	1.04392	1.012
C11019	331144	235537	218467	267381	356442	323113	277601	293296	265341	243171	249811	265464	264152	1.01223	1.34939	1.22321	1.05091	1.11033	1.0045	0.920575	0.945712	1.00497
C11022	395248	478145	447494	507473	430971	445188	447683	453072	465351	501988	475054	460244	449914	1.12793	0.957896	0.989496	0.995043	1.00702	1.03431	1.11574	1.05588	1.02296
C11029	190875	197645	190768	200981	207714	200954	196958	200724	205334	193452	198080	196275	195309	1.02904	1.06351	1.0289	1.00844	1.02773	1.05133	0.990491	1.01419	1.00495
C11035	426967	473022	482106	504291	435854	457380	491766	529506	460287	468242	471694	488086	469502	1.0741	0.928332	0.974181	1.04742	1.1278	0.980373	0.997315	1.00467	1.03958
C11041	219478	161171	164836	216918	235277	222568	198751	213141	190170	192354	204376	195540	184499	1.17571	1.27522	1.20634	1.07724	1.15524	1.03073	1.04257	1.10773	1.05984
C11045	371146	306171	307003	330763	502801	333423	401774	427068	327942	314991	380488	374073	319904	1.03395	1.57173	1.04226	1.25592	1.33499	1.02513	0.984642	1.18938	1.16933
C11052	284741	180731	186374	206473	287770	238646	217625	283715	201879	203709	222763	234926	211115	0.978013	1.3631	1.13041	1.03084	1.34389	0.95625	0.964922	1.05517	1.11279
C11055	676217	787872	770687	817628	738124	692404	775633	789770	814931	763807	771653	791692	753480	1.08514	0.979619	0.918941	1.0294	1.04816	1.08156	1.01371	1.02412	1.05071
C11061	3.65012e+06	4.52402e+06	3.70553e+06	6.61031e+07	3.72133e+06	3.53541e+06	4.64116e+07	5.04442e+07	4.31566e+07	3.37662e+07	3.85514e+07	3.98363e+07	1.59004e+07	4.15733	0.23404	0.222348	2.9189	3.17251	2.71419	2.12361	2.42456	2.50537
C11066	482132	444123	442063	479535	522776	503775	458189	455043	459523	459477	456774	479687	456740	1.04991	1.14458	1.10298	1.00317	0.996284	1.00609	1.00599	1.00007	1.05024
C11085	370616	305733	306564	330290	502082	332946	345499	426458	327474	314540	361269	335172	319446	1.03395	1.57173	1.04226	1.08156	1.33499	1.02513	0.984642	1.13092	1.04923
C11086	226194	173224	151323	184137	200073	199893	171944	173018	182617	177872	164050	180374	185677	0.991707	1.07753	1.07656	0.926038	0.931819	0.983519	0.957964	0.883523	0.971437
C11088	2.30675e+06	2.17155e+06	2.1696e+06	2.36456e+06	2.34549e+06	2.34426e+06	2.36676e+06	2.23009e+06	2.24163e+06	2.32076e+06	2.26279e+06	2.21837e+06	2.21978e+06	1.06522	1.05663	1.05608	1.06621	1.00464	1.00984	1.04549	1.01938	0.999364
C11092	2.27107e+06	1.57665e+07	1.49756e+07	5.04711e+08	2.25896e+06	2.13393e+06	7.76348e+08	7.21717e+07	5.03242e+08	5.98177e+08	6.13542e+08	7.22114e+08	1.26356e+08	3.99435	0.0178777	0.0168882	6.14412	0.571176	3.98272	4.73405	4.85565	5.7149
C11096	1.77279e+06	1.72531e+06	1.65783e+06	1.80125e+06	1.72832e+06	1.71281e+06	1.70089e+06	1.70553e+06	1.64591e+06	1.71645e+06	1.70146e+06	1.68966e+06	1.70063e+06	1.05917	1.01629	1.00716	1.00015	1.00288	0.967826	1.0093	1.00049	0.993552
C11112	628434	614947	616666	671111	668935	649286	606637	621846	684400	629379	705937	627104	613162	1.09451	1.09096	1.05891	0.989359	1.01416	1.11618	1.02645	1.15131	1.02274
C11113	964076	1.09472e+06	1.07185e+06	1.13148e+06	1.14323e+06	1.10819e+06	1.09915e+06	1.05693e+06	1.1015e+06	1.12372e+06	1.15734e+06	1.11888e+06	1.06642e+06	1.06101	1.07203	1.03917	1.03069	0.991102	1.03289	1.05373	1.08525	1.04919
C11114	330141	304777	299675	333374	326930	312871	299796	317551	302431	325884	300505	297659	308892	1.07926	1.0584	1.01288	0.970556	1.02803	0.979085	1.05501	0.972851	0.963637
C11118	732628	803537	752131	754084	825507	780444	696581	707650	647431	679918	744184	758291	744416	1.01299	1.10893	1.0484	0.935741	0.950611	0.869717	0.913357	0.999687	1.01864
C11134	9.53095e+07	2.16812e+07	3.16053e+06	3.47103e+08	8.91371e+07	7.58619e+07	6.72412e+08	4.01338e+08	3.4773e+08	6.83437e+08	3.92104e+08	7.60778e+08	1.60097e+08	2.16808	0.556769	0.47385	4.20003	2.50684	2.17199	4.26889	2.44916	4.75198
C11136	1.8193e+06	1.71889e+06	1.75794e+06	2.00984e+07	1.76041e+06	1.59877e+06	1.57228e+07	1.12899e+07	1.18514e+07	1.83845e+07	4.07342e+06	6.81252e+06	4.9886e+06	4.02886	0.352886	0.320485	3.15176	2.26314	2.3757	3.68531	0.816546	1.36562
C11149	523305	480558	473853	556534	522675	515787	543747	502227	510596	475008	500488	494223	489394	1.13719	1.06801	1.05393	1.11106	1.02622	1.04332	0.970605	1.02267	1.00987
C11155	420810	383496	364484	412099	411074	442181	431132	422354	422886	406794	417999	401005	397774	1.03601	1.03344	1.11164	1.08386	1.06179	1.06313	1.02268	1.05085	1.00812
C11165	572946	558323	582394	556179	581081	537248	547874	544227	522208	537916	543981	531789	551099	1.00922	1.0544	0.974866	0.994148	0.987531	0.947576	0.976078	0.987083	0.964962
C11172	362167	298764	299575	322761	490637	325356	337623	416736	320008	307370	353033	327531	312164	1.03395	1.57173	1.04226	1.08156	1.33499	1.02513	0.984642	1.13092	1.04923
C11188	299506	331483	327187	351514	348453	337984	328960	328354	341413	343497	326934	347597	322258	1.09078	1.08129	1.0488	1.0208	1.01892	1.05944	1.06591	1.01451	1.07863
C11195	1.96517e+06	2.29496e+06	2.93937e+06	2.54107e+06	1.92069e+06	1.82677e+06	2.40785e+06	1.54364e+06	3.30209e+06	3.05895e+06	2.21454e+06	1.63214e+06	2.58876e+06	0.98158	0.741934	0.705657	0.930118	0.596285	1.27555	1.18163	0.855445	0.630472
C11203	3.57099e+06	333416	340253	774279	3.57665e+06	3.90269e+06	736277	815028	697871	800560	702470	894565	1.26337e+06	0.612868	2.83104	3.08911	0.582788	0.645122	0.552389	0.63367	0.556029	0.708079
C11222	975510	1.11249e+06	1.10444e+06	1.27736e+06	1.06012e+06	1.04636e+06	1.11712e+06	1.13922e+06	1.18931e+06	1.10823e+06	1.12668e+06	1.1647e+06	1.0918e+06	1.16996	0.970988	0.958383	1.0232	1.04343	1.08931	1.01505	1.03195	1.06677
C11226	350936	205645	182707	278592	498561	510307	258633	262804	260571	265701	291603	278332	260500	1.06945	1.91386	1.95895	0.992832	1.00884	1.00027	1.01997	1.1194	1.06845
C11228	253532	227086	222829	645579	260124	263482	326268	669753	267623	448337	558786	677908	242523	2.66192	1.07257	1.08642	1.3453	2.7616	1.10349	1.84863	2.30405	2.79523
C11249	183736	98934.8	103536	142254	158264	169129	130799	158799	125774	149523	135062	129328	128226	1.1094	1.23426	1.31899	1.02007	1.23843	0.980875	1.16609	1.05331	1.00859
C11255	918396	620068	630226	650454	884126	796873	698584	686248	625287	649417	722405	781631	692629	0.939108	1.27648	1.1505	1.0086	0.990786	0.902773	0.937612	1.04299	1.1285
C11268	226855	220479	209669	226923	258571	245563	218251	230216	239343	226643	221170	234547	218546	1.03833	1.18314	1.12362	0.998652	1.0534	1.09516	1.03705	1.01201	1.07322
C11283	1.49827e+06	1.36967e+06	1.43045e+06	1.35183e+06	1.46439e+06	1.44609e+06	1.43381e+06	1.38675e+06	1.2851e+06	1.34968e+06	1.46177e+06	1.62445e+06	1.36184e+06	0.99265	1.0753	1.06187	1.05285	1.01829	0.943652	0.991068	1.07338	1.19284
C11292	2.60479e+06	814081	741313	2.09893e+06	2.5385e+06	2.47357e+06	2.12035e+06	2.34553e+06	1.95955e+06	2.19261e+06	2.20592e+06	2.2845e+06	1.64001e+06	1.27983	1.54786	1.50826	1.29289	1.43019	1.19484	1.33694	1.34506	1.39298
C11299	507961	502963	498324	535410	511404	529186	507910	524938	498392	516367	499594	487776	496039	1.07937	1.03097	1.06682	1.02393	1.05826	1.00474	1.04098	1.00717	0.983341
C11301	6.34841e+08	629230	626283	1.4641e+08	1.83812e+09	1.28705e+09	4.83631e+06	1.01972e+07	5.31557e+07	6.36822e+06	5.59496e+06	2.42326e+07	1.77707e+08	0.823882	10.3435	7.24252	0.0272151	0.0573818	0.299119	0.0358355	0.0314841	0.136363
C11303	3.14014e+06	2.61478e+06	2.64446e+06	2.58886e+06	3.3901e+06	3.09719e+06	2.54145e+06	2.68049e+06	2.66642e+06	2.59581e+06	2.60219e+06	2.60026e+06	2.74723e+06	0.942351	1.234	1.12738	0.925095	0.975705	0.970583	0.944883	0.947202	0.9465
C11309	5.12111e+06	4.37608e+06	4.63839e+06	4.90033e+06	5.00447e+06	4.72748e+06	5.17174e+06	5.11036e+06	5.08274e+06	5.0288e+06	5.24703e+06	5.30325e+06	4.71913e+06	1.0384	1.06047	1.00177	1.09591	1.0829	1.07705	1.06562	1.11186	1.12378
C11315	409222	388920	347147	414518	395883	386088	367257	328187	293168	372801	373806	356379	374491	1.10688	1.05712	1.03097	0.980682	0.876355	0.782842	0.995486	0.998169	0.951635
C11318	3.49335e+09	681351	677346	1.18104e+08	1.83812e+09	1.28705e+09	5.15916e+06	7.58471e+07	5.81996e+07	8.07916e+06	7.89119e+06	1.26758e+07	8.89715e+08	0.132744	2.06596	1.44658	0.00579866	0.0852487	0.0654137	0.00908061	0.00886934	0.014247
C11328	710047	681348	681165	538775	687060	623977	536662	622490	563162	534963	593903	610110	645176	0.835082	1.06492	0.967142	0.831808	0.964838	0.872881	0.829173	0.920529	0.945649
C11329	541588	519545	499472	469290	530332	563401	486435	520390	526274	519045	492034	487913	505873	0.927684	1.04835	1.11372	0.961576	1.0287	1.04033	1.02604	0.972644	0.964497
C11331	508879	413855	415036	454240	526536	436384	405027	475111	434163	465401	414952	464721	448920	1.01185	1.17289	0.972076	0.902225	1.05834	0.967129	1.03671	0.924334	1.0352
C11334	277576	320546	247527	266783	260019	260492	264869	291357	255737	258342	254978	245806	276215	0.965854	0.941364	0.943076	0.958923	1.05482	0.925863	0.935295	0.923116	0.889907
C11341	457833	351193	415671	404017	442910	431951	629905	364214	369997	417086	4.18865e+06	1.44787e+06	397436	1.01656	1.11442	1.08685	1.58492	0.91641	0.93096	1.04944	10.5392	3.64303
C11342	120362	85465.1	86888.3	94872	117711	105001	102673	130158	93211.5	90946.8	96612	103354	95879.2	0.989494	1.2277	1.09514	1.07086	1.35752	0.972176	0.948556	1.00764	1.07796
C11345	238750	174072	172748	223894	245162	235183	231953	220492	189617	217697	227352	219353	198839	1.126	1.23296	1.18278	1.16654	1.10889	0.95362	1.09484	1.14339	1.10316
C11351	214444	220609	216578	225819	217600	219314	214269	213755	220247	220040	211800	219175	213427	1.05806	1.01955	1.02758	1.00394	1.00154	1.03195	1.03098	0.992375	1.02693
C11352	2.95032e+06	5.30862e+06	1.77118e+06	1.19971e+06	878533	980820	1.35087e+06	1.75924e+06	2.0117e+06	1.2928e+06	2.01199e+06	2.54348e+06	3.03904e+06	0.394765	0.289082	0.322739	0.444505	0.578878	0.661951	0.425397	0.662047	0.836934
C11355	211347	203996	209626	206045	210051	215113	215291	215508	213539	203001	202051	212149	206938	0.995681	1.01504	1.0395	1.04036	1.04141	1.03189	0.980971	0.976382	1.02518
C11371	1.20855e+06	460943	463328	490034	577198	499155	499234	505802	495152	719156	670420	780690	655081	0.748051	0.881109	0.761974	0.762094	0.77212	0.755863	1.09781	1.02341	1.19174
C11378	970016	937294	956164	991125	1.0267e+06	954977	996407	989219	1.03871e+06	956322	970431	951709	965397	1.02665	1.0635	0.989207	1.03212	1.02468	1.07594	0.9906	1.00521	0.985821
C11437	271221	223740	224348	241711	367431	243655	245633	312088	226207	230185	244443	245283	233775	1.03395	1.57173	1.04226	1.05072	1.33499	0.967624	0.984642	1.04563	1.04923
C11490	208511	148057	152679	164353	203918	181900	178280	232422	165259	165754	175387	179046	166759	0.985569	1.22283	1.09079	1.06909	1.39376	0.991005	0.993971	1.05174	1.07368
C11504	88663.1	104785	100818	107696	95630	92776.5	91177.6	95353.6	103664	105503	91518.3	91270.9	100078	1.07612	0.955558	0.927044	0.911068	0.952795	1.03584	1.05421	0.914472	0.912
C11510	4.2365e+08	4.17152e+08	4.00688e+08	4.20051e+08	4.45988e+08	1.60262e+08	1.77062e+08	4.36209e+08	4.33537e+08	4.31944e+08	4.36044e+08	4.2742e+08	3.70307e+08	1.13433	1.20437	0.432782	0.47815	1.17797	1.17075	1.16645	1.17752	1.15423
C11516	3.34093e+06	3.46929e+06	3.48756e+06	3.82659e+06	3.36921e+06	3.39859e+06	3.63245e+06	3.21757e+06	3.46985e+06	3.49682e+06	3.58239e+06	3.39308e+06	3.43913e+06	1.11266	0.97967	0.988214	1.05621	0.935578	1.00893	1.01678	1.04166	0.98661
C11520	256259	189731	183692	198676	250721	218163	203965	220778	191095	184786	188545	195206	203031	0.97855	1.23489	1.07453	1.0046	1.08741	0.94121	0.910135	0.92865	0.961457
C11544	786065	739991	739326	791689	778419	763763	740379	759941	716627	775928	771085	751988	743350	1.06503	1.04718	1.02746	0.996004	1.02232	0.964051	1.04383	1.03731	1.01162
C11571	197548	158363	155496	161208	186109	165096	178415	175265	156257	160358	179633	199625	166733	0.966865	1.11621	0.990184	1.07007	1.05117	0.93717	0.961767	1.07737	1.19728
C11573	2.42104e+06	2.37114e+06	2.25898e+06	2.27525e+06	2.39259e+06	2.44572e+06	2.32213e+06	2.25819e+06	2.26011e+06	2.38698e+06	2.54419e+06	2.45514e+06	2.37812e+06	0.956742	1.00608	1.02842	0.976454	0.949569	0.950376	1.00372	1.06983	1.03238
C11584	2.0478e+06	2.25774e+06	2.21062e+06	2.30894e+06	2.08442e+06	1.9939e+06	2.21731e+06	2.45286e+06	2.30132e+06	2.23769e+06	2.1995e+06	2.23569e+06	2.18632e+06	1.05608	0.953391	0.911988	1.01417	1.12191	1.0526	1.02349	1.00603	1.02258
C11593	143190	143461	143999	155127	153969	156380	148855	153436	151512	147768	146114	142823	144520	1.0734	1.06538	1.08207	1.03	1.06169	1.04838	1.02248	1.01103	0.988258
C11602	3.04029e+06	2.93631e+06	2.98386e+06	2.98858e+06	3.30731e+06	3.16274e+06	2.95912e+06	2.97833e+06	3.0881e+06	3.11285e+06	3.06156e+06	2.99966e+06	3.01957e+06	0.989736	1.09529	1.04741	0.979978	0.986341	1.0227	1.03089	1.0139	0.993405
C11604	1.33357e+08	1.40662e+08	1.42849e+08	1.72171e+08	1.71807e+08	1.71051e+08	1.59391e+08	1.60247e+08	1.56851e+08	1.38752e+08	1.41052e+08	1.4514e+08	1.38284e+08	1.24506	1.24242	1.23695	1.15263	1.15882	1.13426	1.00338	1.02002	1.04958
C11646	47303.8	16521.7	16344	29746.4	53862.3	52142.4	24503.8	29189.9	25528.2	27443.7	31192.8	28953	28074	1.05957	1.91858	1.85732	0.872826	1.03975	0.909316	0.977546	1.11109	1.03131
C11655	413021	432527	430579	429800	437101	433409	441860	428863	443010	439273	429224	432645	424882	1.01158	1.02876	1.02007	1.03996	1.00937	1.04267	1.03387	1.01022	1.01827
C11675	87199.9	93381.3	82690.1	2.45828e+06	89638.3	88750.6	2.07226e+06	1.65849e+06	1.05221e+06	1.11366e+06	1.34878e+06	9.12148e+06	367460	6.68994	0.24394	0.241524	5.63941	4.51338	2.86348	3.03069	3.67055	24.8231
C11684	3.42107e+06	4.24014e+06	3.47301e+06	1.25296e+07	3.48782e+06	3.31357e+06	2.61538e+07	1.55786e+07	3.42821e+07	3.51021e+07	3.60323e+07	3.17782e+07	1.73243e+07	0.723238	0.201326	0.191268	1.50967	0.899234	1.97885	2.02618	2.07988	1.83432
C11695	773106	233076	229376	620942	752800	737506	592029	627865	565012	676686	662573	709900	471438	1.31712	1.59682	1.56438	1.25579	1.33181	1.19849	1.43537	1.40543	1.50582
C11700	2.65871e+06	3.33728e+06	2.7335e+06	1.33915e+07	2.74515e+06	2.608e+06	5.41058e+06	5.5684e+07	4.73135e+07	2.71239e+07	1.27774e+07	1.2781e+07	8.17977e+06	1.63715	0.335603	0.318836	0.661459	6.80753	5.78421	3.31598	1.56207	1.56251
C11707	2.03568e+06	1.82488e+06	1.77597e+06	2.08283e+06	2.14647e+06	1.87984e+06	1.98641e+06	2.26083e+06	1.82621e+06	1.94672e+06	2.0253e+06	2.06193e+06	1.86042e+06	1.11955	1.15376	1.01044	1.06772	1.21523	0.981613	1.04639	1.08863	1.10831
C11709	338708	384718	375189	391239	357133	348354	365597	372801	362575	360823	371821	355116	364632	1.07297	0.979433	0.955357	1.00264	1.0224	0.994358	0.989551	1.01971	0.973901
C11710	383532	406827	405781	431964	396664	406133	390564	415302	407311	402674	406443	408782	399511	1.08123	0.992876	1.01658	0.977607	1.03953	1.01953	1.00792	1.01735	1.02321
C11711	69116.2	68894.7	67723.7	67870.6	71772.1	72408.2	69802.1	70425.4	68906.9	69305.4	68223.7	64930.5	68116.2	0.996396	1.05367	1.06301	1.02475	1.0339	1.01161	1.01746	1.00158	0.953232
C11712	220697	270003	248219	258101	229357	227006	250257	237933	259696	253523	251761	236298	246083	1.04884	0.932032	0.92248	1.01697	0.966881	1.05532	1.03024	1.02307	0.960239
C11714	2.50749e+09	1.70331e+07	5.99763e+06	2.92974e+08	1.77437e+09	1.56511e+09	4.80369e+08	7.06218e+08	1.12813e+08	2.7209e+08	3.89911e+08	6.1324e+08	6.84245e+08	0.428172	2.59317	2.28735	0.702042	1.03211	0.164872	0.39765	0.56984	0.896228
C11715	1.29975e+06	1.36256e+06	1.30974e+06	1.47394e+06	1.39268e+06	1.3436e+06	1.33787e+06	1.33176e+06	1.37128e+06	1.41638e+06	1.41323e+06	1.38952e+06	1.32823e+06	1.1097	1.04852	1.01157	1.00726	1.00265	1.0324	1.06636	1.06399	1.04614
C11729	1.78811e+06	1.89978e+06	1.88814e+06	1.92039e+06	1.90552e+06	1.92579e+06	1.89434e+06	1.94341e+06	1.87858e+06	1.93935e+06	1.85943e+06	1.89038e+06	1.86509e+06	1.02965	1.02168	1.03255	1.01568	1.04199	1.00723	1.03982	0.996966	1.01356
C11758	1.81889e+06	1.8077e+06	1.82133e+06	1.87486e+06	1.83385e+06	1.83577e+06	1.87904e+06	1.81314e+06	1.85016e+06	1.8566e+06	1.9033e+06	1.86057e+06	1.8187e+06	1.03088	1.00833	1.00938	1.03317	0.996941	1.01729	1.02083	1.04652	1.02302
C11769	3.65156e+07	1.0104e+08	1.02551e+08	3.45807e+07	1.52221e+07	3.28585e+07	3.86953e+07	3.18598e+07	4.42891e+07	4.04492e+07	3.67621e+07	3.63132e+07	6.55771e+07	0.527328	0.232124	0.501067	0.590073	0.485837	0.675374	0.616819	0.560594	0.553748
C11773	329547	338259	339483	1.43341e+07	302005	310455	6.82246e+06	371098	8.47008e+06	8.81405e+06	7.93846e+06	8.02552e+06	922718	15.5347	0.327299	0.336457	7.39387	0.402179	9.17949	9.55227	8.60335	8.6977
C11774	234008	240946	243404	252016	237247	231873	240114	239956	239386	253030	232117	243165	237408	1.06153	0.999321	0.976686	1.0114	1.01073	1.00833	1.06581	0.977715	1.02425
C11800	583644	251184	239882	380227	634277	644067	335299	428585	341899	350792	505394	414127	367421	1.03485	1.7263	1.75294	0.912575	1.16647	0.930538	0.954744	1.37552	1.12712
C11803	372263	276413	284730	367921	395380	377504	337107	366186	319207	327371	346648	345928	315445	1.16636	1.2534	1.19674	1.06867	1.16086	1.01193	1.03781	1.09892	1.09664
C11804	2.20234e+06	806170	841009	1.21241e+06	3.06789e+06	1.55355e+06	1.09769e+06	1.41858e+06	974513	1.16608e+06	1.22313e+06	1.22428e+06	1.23244e+06	0.983748	2.48929	1.26055	0.890664	1.15103	0.790721	0.946161	0.992448	0.993383
C11806	438829	203224	199143	1.25752e+06	523862	390750	1.86222e+06	482261	824324	458414	457036	919512	272680	4.61171	1.92116	1.433	6.8293	1.7686	3.02304	1.68114	1.67609	3.37213
C11810	1.47739e+06	422506	402521	405420	1.49692e+06	810023	698621	402380	402722	402480	428957	437473	685250	0.591638	2.18449	1.18208	1.01951	0.587202	0.587701	0.587347	0.625986	0.638414
C11819	584150	583801	575991	606982	591581	579776	591081	573695	592619	587620	579965	586838	581097	1.04454	1.01804	0.997726	1.01718	0.987262	1.01983	1.01123	0.998051	1.00988
C11830	239322	208420	214320	795040	246189	245418	594830	643614	414033	766898	810883	806999	329682	2.41153	0.746745	0.744408	1.80425	1.95223	1.25586	2.32617	2.45959	2.44781
C11831	345470	327598	316090	453748	349949	340953	455606	341501	407045	414711	404938	473392	365327	1.24203	0.957906	0.93328	1.24712	0.934782	1.11419	1.13518	1.10843	1.2958
C11841	453018	302930	296288	351480	443619	436593	361602	385081	331776	314929	311466	351050	346526	1.0143	1.28019	1.25991	1.04351	1.11126	0.957434	0.908818	0.898824	1.01305
C11849	1.01762e+06	510196	789980	1.11729e+06	1.21849e+06	1.31333e+06	1.21003e+06	1.34202e+06	1.16789e+06	1.40268e+06	1.39935e+06	1.03654e+06	919928	1.21455	1.32455	1.42764	1.31535	1.45883	1.26954	1.52477	1.52115	1.12676
C11878	255081	150989	137119	194485	242007	235217	183137	227000	181624	177403	190571	185588	180573	1.07705	1.34022	1.30262	1.0142	1.25711	1.00582	0.982445	1.05537	1.02778
C11891	654833	664115	712548	568221	707272	598388	652833	674548	632755	663989	679538	648317	662536	0.857645	1.06752	0.903178	0.985355	1.01813	0.95505	1.00219	1.02566	0.978539
C11918	493282	359650	364096	480256	511580	485911	479239	470639	391769	449785	469732	490986	412020	1.16561	1.24164	1.17934	1.16315	1.14227	0.95085	1.09166	1.14007	1.19166
C11923	3.49043e+06	3.46279e+06	3.55613e+06	3.45082e+06	3.32748e+06	3.62836e+06	3.44746e+06	3.47412e+06	3.33433e+06	3.39624e+06	3.37919e+06	3.47942e+06	3.47966e+06	0.991711	0.956267	1.04274	0.990747	0.998409	0.958235	0.976027	0.971128	0.999933
C11959	691864	689282	686139	1.54166e+07	692809	662377	1.44014e+07	1.03253e+07	7.28253e+06	1.59779e+07	1.28033e+07	1.8547e+07	3.6166e+06	4.26274	0.191564	0.183149	3.98202	2.85499	2.01364	4.41794	3.54016	5.12831
C11960	5.36017e+07	6.74141e+07	6.61989e+07	4.26785e+07	6.91503e+07	6.59005e+07	3.94593e+07	2.3849e+07	3.1647e+07	3.09236e+07	2.83816e+07	2.2549e+07	4.90404e+07	0.870272	1.41007	1.3438	0.804629	0.486313	0.645326	0.630574	0.57874	0.459804
C11985	8.82342e+06	740438	755622	4.18182e+06	9.55125e+06	2.61869e+06	1.76273e+06	2.03034e+06	3.37506e+06	8.9546e+06	1.88038e+06	4.62459e+06	3.95404e+06	1.05761	2.41557	0.662283	0.445804	0.513484	0.853574	2.26467	0.47556	1.16959
C11987	1.05021e+06	1.04629e+06	1.04152e+06	1.1119e+06	1.08035e+06	1.05799e+06	1.0371e+06	1.08812e+06	1.05295e+06	1.13475e+06	1.05831e+06	1.08737e+06	1.0557e+06	1.05323	1.02334	1.00217	0.982373	1.03071	0.997394	1.07487	1.00247	1.02999
C11990	690305	593103	566954	672335	670744	648619	696577	651114	654039	688178	706533	727615	626996	1.07231	1.06977	1.03449	1.11098	1.03847	1.04313	1.09758	1.12685	1.16048
C11991	3.32503e+06	3.16288e+06	3.10709e+06	8.61164e+06	3.21625e+06	3.28163e+06	1.02816e+07	1.03137e+07	9.7573e+06	1.00899e+07	8.79313e+06	8.87557e+06	5.38353e+06	1.59963	0.597423	0.609568	1.90982	1.91578	1.81243	1.87421	1.63334	1.64865
C11998	210764	43730.5	44510.1	71104.4	126740	1.6788e+06	64190.3	78736.7	51199.8	58977.1	62908.4	72245.7	88739.3	0.801273	1.42823	18.9184	0.723358	0.887281	0.576969	0.664611	0.708912	0.814135
C12011	9.3141e+06	1.35854e+06	1.35395e+06	8.75548e+06	1.00517e+07	9.82248e+06	5.0737e+06	3.91295e+06	4.79544e+06	2.17932e+07	2.71639e+07	3.81663e+06	5.18347e+06	1.68911	1.93918	1.89496	0.978822	0.754889	0.92514	4.20437	5.24049	0.736307
C12012	584629	677142	681388	690684	609937	609613	668578	696394	663682	676216	680024	684620	649743	1.06301	0.938736	0.938237	1.02899	1.0718	1.02145	1.04074	1.0466	1.05368
C12027	226847	138053	138365	179732	207259	199418	149058	204028	165458	175554	165692	159814	166910	1.07682	1.24174	1.19476	0.893049	1.22238	0.991302	1.05179	0.992701	0.957487
C12039	302157	340760	331688	334771	312574	332628	316318	314898	324176	331965	318181	315032	320572	1.04429	0.975051	1.03761	0.98673	0.982301	1.01124	1.03554	0.992543	0.982718
C12044	426720	390044	380526	410128	403174	401952	407185	447906	402338	397152	391980	377879	401203	1.02225	1.00491	1.00187	1.01491	1.11641	1.00283	0.989903	0.977013	0.941865
C12045	259531	232459	228101	670328	267143	269717	333988	683037	273956	581300	579980	718736	247518	2.7082	1.07929	1.08968	1.34935	2.75954	1.10681	2.34852	2.34318	2.90377
C12062	734800	740070	740449	833277	742876	759587	756350	735835	775234	800733	798952	785546	731861	1.13857	1.01505	1.03788	1.03346	1.00543	1.05926	1.09411	1.09167	1.07335
C12065	433724	257132	235902	330563	412132	417162	320806	369449	305338	288962	310806	315134	305795	1.08099	1.34774	1.36419	1.04909	1.20816	0.998503	0.944952	1.01639	1.03054
C12081	598702	631621	629681	670197	612697	564017	628330	675826	679790	631477	637081	632959	637167	1.05184	0.961596	0.885195	0.986132	1.06067	1.06689	0.991071	0.999865	0.993396
C12098	4.63706e+06	1.67244e+06	1.67416e+06	2.7986e+06	3.76896e+06	3.72308e+06	2.63048e+06	3.08176e+06	2.32159e+06	2.59309e+06	2.5787e+06	2.72725e+06	2.59371e+06	1.07899	1.45311	1.43542	1.01417	1.18816	0.895085	0.999759	0.994212	1.05148
C12101	591653	627702	643153	667348	597538	620958	654395	677142	645277	657521	674041	665693	626664	1.06492	0.953522	0.990894	1.04425	1.08055	1.0297	1.04924	1.0756	1.06228
C12108	340217	386410	362185	403555	374331	350148	297582	267481	317701	337160	333700	369862	351090	1.14943	1.0662	0.997317	0.847595	0.761858	0.904899	0.960323	0.950468	1.05347
C12109	100739	100926	99036.7	102255	104985	102743	101030	102955	102507	103784	98015.5	99407.2	100649	1.01595	1.04308	1.0208	1.00378	1.02291	1.01846	1.03115	0.973832	0.987659
C12110	313647	204175	198627	240090	306255	300707	243981	282674	236328	230614	225254	240188	233323	1.02901	1.31258	1.2888	1.04568	1.21152	1.01288	0.98839	0.965416	1.02943
C12114	1.47302e+06	519327	2.20441e+06	674602	503914	511707	524610	508334	511056	1.02293e+06	3.94847e+06	925275	1.17108e+06	0.576053	0.430299	0.436954	0.447972	0.434074	0.436398	0.873496	3.37165	0.790106
C12127	815837	828583	813047	947136	823488	764346	760755	742703	858837	865513	814534	794558	823290	1.15043	1.00024	0.928404	0.924043	0.902115	1.04318	1.05129	0.989364	0.965101
C12150	679507	568914	605351	637967	726078	675680	654961	591569	618030	618403	630563	693777	614297	1.03853	1.18197	1.09992	1.0662	0.963002	1.00608	1.00668	1.02648	1.12938
C12153	839379	980442	1.02554e+06	1.03419e+06	938418	903325	970398	950955	984406	977216	1.03197e+06	1.00972e+06	963707	1.07314	0.973759	0.937344	1.00694	0.986769	1.02148	1.01402	1.07083	1.04774
C12154	2.0826e+07	5.8973e+06	369318	1.10639e+06	1.5326e+06	1.76472e+07	9.95549e+06	898479	3.98819e+06	701634	976185	1.37719e+07	8.07851e+06	0.136954	0.189713	2.18447	1.23234	0.111219	0.49368	0.0868519	0.120837	1.70475
C12215	1.414e+06	1.50231e+06	1.4931e+06	1.50907e+06	1.50684e+06	1.52287e+06	1.498e+06	1.5368e+06	1.48554e+06	1.5336e+06	1.50113e+06	1.49487e+06	1.46541e+06	1.02979	1.02827	1.03921	1.02224	1.04872	1.01374	1.04653	1.02438	1.0201
C12216	603485	640836	662759	715273	609488	633376	681693	699980	683872	729971	687521	699494	649451	1.10135	0.938467	0.975249	1.04965	1.0778	1.053	1.12398	1.05862	1.07705
C12244	2.55406e+07	6.45531e+07	6.67411e+07	1.95782e+07	2.28801e+07	1.20285e+08	3.10597e+07	2.399e+07	2.88159e+07	1.93237e+07	5.48742e+07	7.48207e+07	3.9946e+07	0.490116	0.572775	3.01119	0.777541	0.600559	0.721372	0.483744	1.37371	1.87305
C12256	5.48207e+06	5.25601e+06	5.08901e+06	5.58565e+06	6.58588e+06	5.82443e+06	4.78849e+06	4.62881e+06	4.3299e+06	5.24762e+06	4.86778e+06	5.2009e+06	5.15846e+06	1.08281	1.27671	1.1291	0.928277	0.897324	0.839377	1.01728	0.943649	1.00823
C12287	412781	238830	218619	291005	399513	364169	303598	332731	281097	293895	293988	283695	285029	1.02097	1.40166	1.27766	1.06515	1.16736	0.986205	1.0311	1.03143	0.995319
C12288	485035	249717	247091	573378	636025	643350	539447	555943	690964	558286	706896	444655	436220	1.31442	1.45804	1.47483	1.23664	1.27446	1.58398	1.27983	1.62051	1.01934
C12304	447866	538492	502445	552916	455850	449193	513453	484030	514800	526356	469466	461921	497865	1.11057	0.91561	0.902239	1.03131	0.972212	1.03401	1.05723	0.942959	0.927804
C12310	287132	254841	269948	450848	292751	295648	370187	549776	302880	371830	370518	428109	282304	1.59703	1.037	1.04727	1.31131	1.94746	1.07289	1.31712	1.31248	1.51648
C12311	5.50743e+06	4.31986e+06	3.95572e+06	4.91266e+06	6.03817e+06	5.49604e+06	4.53969e+06	4.6008e+06	4.56276e+06	4.79313e+06	4.61125e+06	4.95355e+06	4.57426e+06	1.07398	1.32003	1.20152	0.992443	1.0058	0.997485	1.04785	1.00809	1.08292
C12312	273371	353498	329835	349085	294230	293694	337061	313019	332770	345531	318588	308731	319512	1.09256	0.920875	0.919195	1.05492	0.979678	1.0415	1.08144	0.99711	0.966258
C12332	506289	159392	158248	582199	481667	487349	399438	947333	401066	376848	614581	428800	330255	1.76287	1.45847	1.47567	1.20948	2.86849	1.21441	1.14108	1.86093	1.29839
C12333	845326	1.78603e+06	1.67685e+06	990279	960748	5.66367e+06	931677	3.34012e+06	4.17013e+06	1.86853e+06	990788	1.13406e+06	1.41147e+06	0.701596	0.680674	4.01262	0.660078	2.36642	2.95447	1.32382	0.701957	0.80346
C12337	638402	709455	693590	699821	587960	626546	696750	724512	702591	703153	691153	692472	678457	1.03149	0.866614	0.923488	1.02696	1.06788	1.03557	1.0364	1.01871	1.02066
C12367	977307	1.04432e+06	1.0766e+06	1.06477e+06	999432	1.07223e+06	1.06991e+06	1.04874e+06	1.07649e+06	1.09249e+06	1.0497e+06	998754	1.03009e+06	1.03367	0.97024	1.04091	1.03866	1.0181	1.04504	1.06058	1.01904	0.969581
C12389	1.06641e+06	916251	961466	1.03865e+06	1.03619e+06	1.00201e+06	1.09618e+06	1.00587e+06	1.07731e+06	1.06588e+06	1.11213e+06	1.12405e+06	988056	1.05121	1.04872	1.01413	1.10943	1.01803	1.09034	1.07876	1.12558	1.13764
C12390	242743	246074	253813	257557	248569	239965	246226	255484	247003	247768	246641	241957	245308	1.04993	1.01329	0.978219	1.00374	1.04148	1.00691	1.01003	1.00543	0.986338
C12393	1.96164e+06	1.58826e+06	1.62719e+06	1.73178e+06	2.06219e+06	1.92018e+06	1.73458e+06	1.82059e+06	1.67589e+06	1.80655e+06	1.69868e+06	1.7393e+06	1.7001e+06	1.01863	1.21298	1.12945	1.02028	1.07087	0.98576	1.06261	0.999165	1.02306
C12404	754708	747050	759096	795040	789917	787703	790452	763606	767086	774354	750831	775706	752729	1.05621	1.0494	1.04646	1.05011	1.01445	1.01907	1.02873	0.997478	1.03052
C12406	240349	266274	252266	281098	243741	257470	277503	1.61091e+06	259106	478095	263161	268533	257040	1.0936	0.948261	1.00167	1.07961	6.26716	1.00804	1.86	1.02381	1.04471
C12436	236862	259480	263410	268937	251392	256841	256527	252832	248854	265950	254816	263126	253674	1.06017	0.991005	1.01248	1.01125	0.996682	0.981	1.04839	1.0045	1.03726
C12448	345102	207468	190117	257685	327576	302179	264783	279096	231611	226866	232085	251580	245394	1.05009	1.3349	1.23141	1.07901	1.13734	0.943836	0.924497	0.945764	1.02521
C12454	3.33453e+07	3.48977e+07	4.53633e+07	8.23574e+07	4.40132e+07	3.34983e+07	7.12267e+07	1.05402e+08	6.32761e+07	7.91651e+07	6.53174e+07	6.31769e+07	4.43684e+07	1.85622	0.991994	0.755002	1.60535	2.3756	1.42615	1.78427	1.47216	1.42391
C12531	2.58743e+09	525787	346822	8.80471e+08	2.51291e+09	2.23486e+09	8.50106e+08	2.16429e+08	5.925e+08	7.98722e+08	2.70684e+08	2.0739e+08	8.56318e+08	1.02821	2.93455	2.60985	0.992745	0.252743	0.691916	0.932739	0.316101	0.242188
C12552	1.7014e+06	522243	491963	1.79719e+06	2.10126e+06	5.18621e+06	1.81946e+06	1.88943e+06	1.76866e+06	1.76582e+06	1.98081e+06	1.75431e+06	1.2249e+06	1.46721	1.71545	4.23398	1.48539	1.54252	1.44392	1.4416	1.61712	1.4322
C12570	2.45383e+06	1.91609e+06	2.00172e+06	3.50145e+06	2.27236e+06	2.79131e+06	3.11901e+06	3.2677e+06	1.92903e+06	2.75854e+06	7.63594e+06	1.92716e+06	1.75701e+07	0.199285	0.129331	0.158867	0.177518	0.185981	0.10979	0.157002	0.434599	0.109684
C12599	65629.9	47193.6	53654.1	69329	76145.4	73045.8	72042.9	65588.2	247698	67615.1	70613.7	68129.2	57317.2	1.20957	1.32849	1.27441	1.25692	1.1443	4.32153	1.17967	1.23198	1.18863
C12600	27158.7	23847	23331.4	37779.1	29426.8	26868.4	34382.3	37009.8	30180.3	32043.9	36291.7	41097.8	25705.7	1.46968	1.14476	1.04523	1.33753	1.43975	1.17407	1.24657	1.41181	1.59878
C12669	2.60534e+07	454718	465865	481328	1.30884e+07	1.4438e+07	496611	521235	457116	482530	464269	490679	6.85605e+06	0.0702049	1.90903	2.10587	0.0724341	0.0760256	0.0666733	0.0703803	0.0677167	0.0715688
C12755	270093	224877	220806	228918	264277	220130	251203	248878	221338	227039	255082	283470	234156	0.97763	1.12864	0.940103	1.0728	1.06288	0.945259	0.969608	1.08937	1.21061
C12767	331144	330947	334210	344087	335357	322057	333619	327361	336349	331272	349306	332668	332584	1.03459	1.00834	0.968348	1.00311	0.984296	1.01132	0.996056	1.05028	1.00025
C12835	2.42226e+06	4.91546e+07	5.18674e+07	1.69883e+07	3.08692e+06	4.90025e+06	1.77151e+07	7.50498e+06	2.05018e+07	1.33304e+07	1.0182e+07	1.26751e+07	2.66399e+07	0.637699	0.115876	0.183944	0.664985	0.281719	0.769589	0.500391	0.382208	0.475793
C12842	2.18123e+06	2.15066e+06	2.17908e+06	2.24926e+06	2.2126e+06	2.20674e+06	2.24545e+06	2.2553e+06	2.24684e+06	2.23073e+06	2.13686e+06	2.18507e+06	2.18977e+06	1.02717	1.01043	1.00775	1.02543	1.02993	1.02606	1.01871	0.97584	0.997853
C12891	569941	616194	637274	687769	592635	585769	655480	673064	657575	701902	642035	672596	621893	1.10593	0.952953	0.941913	1.05401	1.08228	1.05738	1.12865	1.03239	1.08153
C12915	3.42824e+06	3.7566e+07	3.13179e+07	5.456e+07	3.72934e+06	3.56632e+06	8.53101e+07	1.86138e+08	3.43546e+07	6.37989e+07	7.89799e+07	2.29744e+08	1.69398e+07	3.22081	0.220152	0.210528	5.03606	10.9882	2.02804	3.76621	4.66238	13.5624
C12937	3.61649e+06	3.4479e+06	3.50374e+06	3.03812e+07	4.11558e+06	3.82991e+06	3.36248e+07	3.45129e+07	2.16485e+07	3.25e+07	2.95693e+07	3.59158e+07	9.87374e+06	3.07697	0.416821	0.387889	3.40548	3.49542	2.19253	3.29156	2.99474	3.6375
C12954	329475	153496	158373	514340	483632	509127	481372	540524	531185	417883	530552	322296	325670	1.57933	1.48503	1.56332	1.4781	1.65973	1.63105	1.28315	1.62911	0.989639
C12958	1.64081e+06	1.729e+06	1.67406e+06	1.76661e+06	1.77627e+06	1.76643e+06	1.5752e+06	1.44323e+06	1.3931e+06	1.40581e+06	1601285	1.66409e+06	1.62716e+06	1.0857	1.09164	1.08559	0.968066	0.886961	0.856153	0.863966	0.984097	1.02269
C12986	176501	179025	174308	177895	182366	184908	173336	179845	181065	172996	174222	168556	175702	1.01248	1.03793	1.0524	0.986534	1.02358	1.03052	0.984597	0.991577	0.959329
C12987	268949	215066	222468	239686	328309	229553	213712	285218	224311	228256	235098	235690	230117	1.04158	1.42671	0.997551	0.928709	1.23945	0.974772	0.991915	1.02165	1.02422
C13038	274649	297226	301507	305610	289683	283509	293799	299589	291371	291644	298801	285377	290654	1.05146	0.99666	0.975417	1.01082	1.03074	1.00247	1.00341	1.02803	0.981845
C13044	526791	602024	547772	1.42423e+06	546203	516271	1.25697e+06	1.43024e+06	1.11857e+06	1.21196e+06	1.22265e+06	1.25696e+06	745716	1.90988	0.732455	0.692316	1.68559	1.91794	1.49999	1.62523	1.63956	1.68557
C13077	425191	405425	412631	464843	428265	388319	438822	461858	442109	441177	429153	466196	417742	1.11275	1.02519	0.929566	1.05046	1.10561	1.05833	1.0561	1.02732	1.11599
C13140	3.93219e+07	1.24536e+08	1.28394e+08	1.87553e+08	6.15799e+07	7.72062e+07	7.45993e+07	8.46936e+07	1.7076e+08	2.01983e+08	1.2268e+08	1.10788e+08	1.28477e+08	1.45982	0.479308	0.600935	0.580644	0.659214	1.32911	1.57214	0.954881	0.862322
C13154	1.53947e+06	488711	457601	1.28411e+06	1.47482e+06	1.47188e+06	1.27981e+06	1.40652e+06	1.23084e+06	1.30218e+06	1.28793e+06	1.34055e+06	969863	1.32401	1.52065	1.51761	1.31958	1.45023	1.26909	1.34264	1.32795	1.38221
C13168	707050	633831	577893	1.45961e+06	745529	652923	1.32997e+07	2.10919e+07	5.10549e+06	1.41904e+07	1.27479e+07	5.43429e+06	634389	2.3008	1.17519	1.02922	20.9646	33.2475	8.04788	22.3685	20.0947	8.56618
C13179	264442	211462	218740	235669	322808	225707	218696	304287	220553	224432	238333	239153	226261	1.04158	1.42671	0.997551	0.966566	1.34485	0.974772	0.991915	1.05335	1.05698
C13244	162267	143124	204174	153669	149869	227501	143997	149113	129469	146517	128625	158174	161404	0.952076	0.928538	1.40952	0.892151	0.92385	0.802145	0.907766	0.796917	0.979988
C13280	438471	383746	408301	395615	428556	396181	386226	363367	367678	394985	398401	395124	392468	1.00802	1.09195	1.00946	0.984096	0.925852	0.936838	1.00641	1.01512	1.00677
C13299	1.3683e+06	1.25191e+06	1.24174e+06	4.95673e+06	1.38463e+06	1.36149e+06	2.57676e+06	1.30329e+07	2.48073e+06	3.62129e+06	2.61406e+06	4.34345e+06	1.63533e+06	3.03102	0.846699	0.83255	1.57568	7.96959	1.51696	2.21441	1.59849	2.65601
C13309	1.19426e+07	2.63484e+06	2.42638e+06	6.19336e+06	7.5692e+06	1.41973e+07	6.0071e+06	7.01231e+06	5.71148e+06	6.36587e+06	6.59492e+06	6.8397e+06	5.91435e+06	1.04717	1.2798	2.40048	1.01568	1.18564	0.965698	1.07634	1.11507	1.15646
C13355	3.16115e+06	323595	324474	349587	4.26531e+06	376330	814219	1.67795e+07	346606	332917	751036	619406	1.03033e+06	0.339296	4.13975	0.365252	0.79025	16.2856	0.336402	0.323117	0.728928	0.601172
C13391	335228	256524	254812	386798	356938	422774	360885	376108	330912	340410	356745	366049	303189	1.27576	1.17728	1.39442	1.1903	1.24051	1.09144	1.12276	1.17664	1.20733
C13424	1.18754e+06	1.49063e+06	1.22094e+06	1.07528e+06	1.15066e+06	1.16489e+06	1.45864e+06	1.77778e+06	1.41656e+06	1.27565e+06	1.04573e+06	1.0148e+06	1.43476e+06	0.749455	0.801991	0.811908	1.01665	1.23908	0.987315	0.889109	0.728853	0.707301
C13429	322321	183974	175310	228273	277448	310013	238406	274033	226911	207026	225248	234191	225473	1.01242	1.23052	1.37495	1.05736	1.21537	1.00638	0.918187	0.999001	1.03866
C13444	1.52009e+07	630932	621701	689842	5.52423e+06	5.24934e+06	662743	751616	629365	681476	683637	721804	4.26977e+06	0.161564	1.2938	1.22942	0.155218	0.176032	0.1474	0.159605	0.160111	0.16905
C13522	236772	210061	212762	232579	280123	245733	285874	228322	233964	230908	270728	276721	220996	1.05241	1.26755	1.11193	1.29357	1.03315	1.05868	1.04485	1.22503	1.25216
C13620	2.19386e+06	237404	384448	244747	1.24923e+06	1.51925e+06	238938	445792	227464	244357	246470	244443	754533	0.324368	1.65563	2.01349	0.31667	0.590819	0.301463	0.323852	0.326653	0.323966
C13688	205117	149550	138447	192354	201757	196403	197444	195701	162906	185847	194504	184923	168297	1.14294	1.19881	1.167	1.17319	1.16283	0.967964	1.10428	1.15572	1.09879
C13698	641072	3.36267e+06	7.77648e+06	426363	1.15203e+06	3.35583e+07	357660	431976	351256	410447	422732	402050	2.44499e+06	0.174382	0.471178	13.7253	0.146283	0.176678	0.143663	0.167872	0.172897	0.164438
C13711	1.42423e+06	1.42736e+06	1.41446e+06	1.52092e+06	1.51616e+06	1.49369e+06	1.46439e+06	1.45076e+06	1.46135e+06	1.45524e+06	1.46654e+06	1.48595e+06	1.43844e+06	1.05734	1.05403	1.03841	1.01804	1.00857	1.01593	1.01168	1.01953	1.03303
C13718	2.57753e+06	324004	593925	1.40828e+06	2.14217e+06	2.78488e+06	1.07911e+06	2.69857e+06	341838	483051	1.05201e+06	1.53822e+06	944874	1.49044	2.26715	2.94735	1.14206	2.85601	0.361781	0.511233	1.11339	1.62797
C13719	282079	272756	281333	248654	268421	287975	262468	246253	255916	254370	267500	268286	264629	0.939632	1.01433	1.08822	0.991833	0.930559	0.967072	0.961233	1.01085	1.01382
C13720	3.88272e+07	450356	424762	986775	2.66683e+06	5.87574e+06	3.25551e+06	2.27992e+06	1.56492e+06	956939	1.29413e+06	5.29507e+06	1.06849e+07	0.092352	0.249588	0.549909	0.304682	0.213377	0.146461	0.0895596	0.121117	0.495564
C13721	97891.9	116357	101436	116299	101961	111148	101365	109210	107160	109575	105774	113560	106663	1.09034	0.955916	1.04205	0.950329	1.02388	1.00466	1.02731	0.991665	1.06466
C13728	465601	347294	349188	429212	490202	478042	367256	383710	364146	407963	435542	401580	388613	1.10447	1.26142	1.23012	0.945043	0.987385	0.93704	1.04979	1.12076	1.03337
C13750	775209	779097	757690	2.49338e+06	837287	708387	3.19822e+06	908015	816801	1.59547e+06	2.80475e+06	2.14794e+06	1.33943e+06	1.86153	0.625107	0.528873	2.38775	0.677912	0.609813	1.19116	2.09399	1.60363
C13757	851178	966675	943111	975922	936528	949279	859557	860738	794637	869892	888387	922333	883714	1.10434	1.05976	1.07419	0.972664	0.974	0.899201	0.984359	1.00529	1.0437
C13812	3.90544e+06	3.06251e+06	3.00968e+06	5.16823e+07	4.00805e+06	3.66175e+06	5.20943e+07	1.26548e+08	2.75899e+07	4.87581e+07	4.89943e+07	5.92618e+07	1.26971e+07	4.07041	0.315667	0.288393	4.10286	9.96669	2.17293	3.84011	3.85871	4.66736
C13824	322875	361332	365237	381491	353151	347851	401599	379209	400999	391269	372728	400255	354332	1.07665	0.996669	0.98171	1.1334	1.07021	1.1317	1.10424	1.05192	1.12961
C13826	340062	397240	381537	410552	372157	349105	390955	372400	410883	385106	386545	377844	372733	1.10146	0.998455	0.93661	1.04889	0.999108	1.10235	1.0332	1.03706	1.01371
C13837	3.4095e+06	2.73212e+06	2.69568e+06	3.1281e+06	4.84375e+06	4.95786e+06	2.68167e+06	2.38281e+06	2.53156e+06	2.9388e+06	2.83306e+06	2.91263e+06	2.89516e+06	1.08046	1.67305	1.71247	0.926261	0.823031	0.874413	1.01507	0.97855	1.00604
C13838													#DIV/0!	#DIV/0!	#DIV/0!	#DIV/0!	#DIV/0!	#DIV/0!	#DIV/0!	#DIV/0!	#DIV/0!	#DIV/0!
C13843	6.94829e+06	2.17227e+06	2.16493e+06	5.59892e+06	6.77148e+06	6.59827e+06	5.65606e+06	6.25671e+06	5.22712e+06	5.84879e+06	5.8843e+06	6.1027e+06	4.41637e+06	1.26777	1.53327	1.49405	1.2807	1.41671	1.18358	1.32435	1.33239	1.38184
C13877	304989	290030	289795	300313	309319	285986	285856	279781	283881	295012	275523	275360	287719	1.04377	1.07507	0.993977	0.993526	0.97241	0.986661	1.02535	0.957613	0.957044
C13901	762894	720787	731862	601017	738197	670418	583998	716069	573401	582054	659773	693661	693154	0.867076	1.06498	0.9672	0.842524	1.03306	0.827235	0.839718	0.951842	1.00073
C13906	1.47005e+06	1.55612e+06	1.55449e+06	1.74937e+06	1.62281e+06	1.69933e+06	1.62296e+06	1.58062e+06	1.57956e+06	1.63079e+06	1.64762e+06	1.66932e+06	1.54519e+06	1.13214	1.05024	1.09976	1.05033	1.02293	1.02225	1.0554	1.06629	1.08033
C13910	509949	413921	398831	497063	527697	531702	517393	517989	393696	435994	525258	485067	438631	1.13321	1.20306	1.21219	1.17956	1.18092	0.897556	0.993988	1.19749	1.10587
C14039	310631	315238	300398	312024	332758	316880	310950	325399	316692	314146	318913	332261	311750	1.00088	1.06739	1.01645	0.997433	1.04378	1.01585	1.00769	1.02298	1.06579
C14077	267894	297953	294646	293395	276211	290141	272526	290037	287377	294282	279864	296405	285438	1.02788	0.967674	1.01648	0.954763	1.01611	1.00679	1.03098	0.980473	1.03842
C14112	608097	404619	376093	473122	598390	582385	460113	513617	450445	420966	444190	444779	454849	1.04017	1.31558	1.28039	1.01157	1.1292	0.990318	0.925507	0.976567	0.977861
C14114	1.00213e+06	323739	307103	762705	980334	950209	798932	883202	772583	807199	819399	851976	633545	1.20387	1.54738	1.49983	1.26105	1.39406	1.21946	1.2741	1.29336	1.34478
C14147	494117	396678	368896	529514	510992	515195	454232	501908	381473	457568	508951	484036	426907	1.24035	1.19696	1.20681	1.06401	1.17568	0.893574	1.07182	1.19218	1.13382
C14155	242218	204413	195634	171968	234377	212857	180678	1.01916e+06	163829	163900	199651	180460	202406	0.849618	1.15795	1.05163	0.892648	5.03522	0.809406	0.809759	0.986386	0.891575
C14164	1.87285e+07	1.71718e+07	1.55968e+07	1.82337e+07	1.90818e+07	1.89272e+07	1.71453e+07	1.76121e+07	1.23825e+07	1.76426e+07	1.75647e+07	1.63397e+07	1.70085e+07	1.07203	1.1219	1.1128	1.00804	1.03549	0.728018	1.03728	1.0327	0.960676
C14179	3.66634e+06	3.59078e+06	3.63501e+06	3.52028e+06	3.6653e+06	3.70372e+06	3.57332e+06	3.5804e+06	3.51129e+06	3.54814e+06	3.6456e+06	3.71799e+06	3.63704e+06	0.967898	1.00777	1.01833	0.982481	0.984426	0.965426	0.975559	1.00236	1.02226
C14186	656540	737621	629835	488037	635286	637857	506577	575903	536318	494650	549149	525242	623462	0.782785	1.01896	1.02309	0.812522	0.923717	0.860225	0.793392	0.880805	0.84246
C14190	1.16542e+09	1.27072e+09	1.25148e+09	1.26814e+09	1.26307e+09	1.24577e+09	1.25713e+09	1.21962e+09	1.25802e+09	1.22427e+09	1.23141e+09	1.23999e+09	1.22682e+09	1.03368	1.02955	1.01545	1.02471	0.994137	1.02543	0.997927	1.00375	1.01074
C14201	1.96954e+06	4.80456e+06	4.42248e+06	2.82943e+06	884382	3.93363e+06	4.58184e+06	4.15307e+06	4.48517e+06	2.1829e+06	3.35098e+06	5.3846e+06	3.65226e+06	0.774705	0.242146	1.07704	1.25452	1.13712	1.22805	0.597684	0.917509	1.47432
C14211	864881	804083	743876	842663	836882	760042	813652	2.48959e+06	2.02074e+06	1.62738e+06	1.37321e+06	1.78226e+06	1.14524e+06	0.735796	0.730747	0.663653	0.710464	2.17386	1.76447	1.42099	1.19906	1.55623
C14213	503028	490189	511322	488307	510170	471686	481015	477814	458482	472272	477597	466894	483847	1.00922	1.0544	0.974866	0.994148	0.987531	0.947576	0.976078	0.987083	0.964962
C14216	398536	261134	253231	277464	386713	345801	303149	369876	271342	273750	313486	320018	294475	0.942231	1.31323	1.1743	1.02946	1.25605	0.921443	0.929619	1.06456	1.08674
C14222	2.57107e+06	2.85503e+06	2.91172e+06	2.8838e+06	2.75436e+06	2.81254e+06	2.80646e+06	2.84369e+06	2.89031e+06	2.86568e+06	2.75346e+06	2.79538e+06	2.76209e+06	1.04406	0.997199	1.01826	1.01606	1.02954	1.04642	1.03751	0.996876	1.01205
C14226	625299	540477	578404	626114	670121	633059	578971	599312	589912	589330	593618	626217	577271	1.08461	1.16084	1.09664	1.00294	1.03818	1.0219	1.02089	1.02832	1.08479
C14251	86675.8	65793	66913.4	88261.1	86575.4	85347.3	81405.9	81579.9	63197.7	76815.5	76198.8	87966	72251.1	1.22159	1.19826	1.18126	1.12671	1.12912	0.874695	1.06317	1.05464	1.2175
C14279	5.7075e+07	7.54247e+08	6.9119e+08	1.10203e+09	8.72736e+07	1.10338e+08	1.8403e+08	1.71923e+08	9.36873e+08	1.00674e+09	2.80259e+08	1.90275e+08	6.77429e+08	1.62678	0.128831	0.162878	0.271659	0.253787	1.38298	1.48612	0.41371	0.280878
C14302	506244	413305	414428	446502	678739	459247	467151	609019	433032	434328	459571	453549	435105	1.02619	1.55994	1.05548	1.07365	1.39971	0.995235	0.998214	1.05623	1.04239
C14307	637189	427198	445935	595569	678110	645741	516631	501010	501659	605867	557845	622247	523687	1.13726	1.29488	1.23307	0.986527	0.956698	0.957936	1.15693	1.06523	1.1882
C14318	36015.9	44339.1	43585.5	43007.6	36589.2	37098.5	38434.5	37952	42238.9	42003.7	36403.8	35554.7	42229.4	1.01843	0.866439	0.878499	0.910136	0.898712	1.00023	0.994656	0.86205	0.841943
C14325	559519	625098	632635	676526	564878	572912	641778	718695	674294	631993	638485	655066	615905	1.09843	0.917151	0.930196	1.04201	1.16689	1.0948	1.02612	1.03666	1.06358
C14328	248494	188459	177187	210640	244421	247745	217969	218937	211081	193500	197235	204322	204675	1.02915	1.19419	1.21043	1.06495	1.06968	1.0313	0.945404	0.963648	0.998275
C14332	818551	788736	811770	834318	855303	796757	866408	959545	871335	843831	830489	803134	809519	1.03063	1.05656	0.984235	1.07028	1.18533	1.07636	1.04239	1.0259	0.992112
C14333	3.34999e+07	2.85164e+07	2.62891e+07	3.74263e+07	3.1054e+07	3.68322e+07	3.24982e+07	3.03039e+07	2.4347e+07	3.88846e+07	2.92836e+07	3.5221e+07	2.89955e+07	1.29076	1.07099	1.27027	1.1208	1.04512	0.83968	1.34106	1.00994	1.2147
C14339	868387	679186	705152	729269	889692	916430	748355	762222	703387	727136	714321	729193	745842	0.977779	1.19287	1.22872	1.00337	1.02196	0.943078	0.97492	0.957738	0.977678
C14343	4.77276e+07	192469	192992	207928	1.17465e+08	2.07181e+06	3.84104e+07	5.45708e+07	206155	198013	3.76211e+07	2.86287e+07	1.20747e+07	0.0172202	9.72818	0.171583	3.18107	4.51944	0.0170734	0.0163991	3.1157	2.37098
C14387	7.60726e+08	1.90294e+06	1.89176e+06	4.53637e+07	7.16705e+08	6.4984e+08	5.37199e+07	1.16374e+08	3.74568e+07	6.28879e+07	6.36236e+07	6.5524e+07	2.045e+08	0.221827	3.50467	3.1777	0.262689	0.569066	0.183163	0.30752	0.311118	0.32041
C14388	648365	716344	734269	727230	694587	704054	692447	679782	728870	715393	689521	685492	691884	1.05109	1.00391	1.01759	1.00081	0.982509	1.05346	1.03398	0.996585	0.990762
C14395	751456	767657	764019	1.96348e+06	747865	695287	3.33467e+06	4.36329e+06	1.92811e+06	3.79788e+06	1.66671e+06	1.66874e+06	1.04925e+06	1.87132	0.712762	0.662651	3.17815	4.15849	1.83761	3.61962	1.58848	1.59042
C14396	209105	218192	212702	526017	225226	214867	529753	1.72051e+06	450499	726118	804472	558692	481231	1.09306	0.468021	0.446495	1.10083	3.57522	0.936138	1.50887	1.67169	1.16096
C14397	4.82807e+07	3.59281e+07	3.81836e+07	4.79687e+07	5.01643e+07	4.32494e+07	4.4812e+07	2.96923e+07	4.41132e+07	3.97638e+07	4.62092e+07	4.47596e+07	4.05531e+07	1.18286	1.237	1.06649	1.10502	0.732183	1.08779	0.980537	1.13947	1.10373
C14398	2.67456e+06	8.00766e+06	8.95817e+06	7.87459e+06	2.41889e+06	3.09052e+06	6.30994e+06	1.25805e+07	6.49467e+06	1.73861e+06	1.23864e+07	5.57813e+06	7.11225e+06	1.10719	0.340102	0.434534	0.887193	1.76885	0.913167	0.244453	1.74155	0.784298
C14402	3.17728e+06	2.86005e+06	2.90049e+06	2.52282e+06	3.08798e+06	2.89887e+06	2.4378e+06	3.82753e+06	2.28025e+06	2.84188e+06	2.211e+06	2.37554e+06	2.90458e+06	0.868569	1.06314	0.998036	0.839295	1.31776	0.785055	0.978414	0.761212	0.817863
C14416	291946	331561	320339	312007	321221	325594	273714	278469	272553	290884	301920	308757	301998	1.03314	1.06365	1.07813	0.906344	0.92209	0.902501	0.9632	0.999741	1.02238
C14422	573020	550106	306466	698779	584208	591690	577798	567482	562658	548391	578770	523092	513284	1.36139	1.13818	1.15275	1.12569	1.10559	1.09619	1.0684	1.12758	1.01911
C14428	881179	815231	816165	903261	872608	835084	824090	847575	844510	869816	815499	847417	837422	1.07862	1.04202	0.997208	0.98408	1.01212	1.00846	1.03868	0.973821	1.01194
C14430	886165	1.69837e+06	2.04301e+06	1.44688e+06	5.32501e+06	1.09645e+07	674067	6.88204e+06	1.89814e+06	2.37152e+06	9.68541e+06	7.58033e+06	1.50668e+06	0.960315	3.53427	7.27727	0.447386	4.56769	1.25982	1.574	6.42832	5.03116
C14436	251687	271104	266372	272474	283595	268114	242773	217861	208944	239214	250916	254281	247036	1.10298	1.14799	1.08533	0.982745	0.8819	0.845803	0.968336	1.01571	1.02933
C14441	182741	190494	182365	193708	188300	194286	190047	189823	189310	195656	185958	183457	185012	1.047	1.01777	1.05013	1.02722	1.02601	1.02323	1.05753	1.00511	0.991596
C14460	9.2871e+07	1.02647e+08	9.98691e+07	1.0189e+08	1.22961e+08	1.16711e+08	1.02891e+08	1.16018e+08	1.17984e+08	1.46913e+08	1.0958e+08	1.13343e+08	1.01618e+08	1.00267	1.21003	1.14853	1.01253	1.14171	1.16106	1.44574	1.07836	1.11538
C14470	257319	304194	302527	343076	291357	276263	302655	305320	314599	339368	321159	307262	296927	1.15542	0.981239	0.930406	1.01929	1.02827	1.05952	1.14293	1.08161	1.03481
C14472	774126	610846	625820	646592	793119	816954	667123	700201	627036	648207	623676	659153	653698	0.98913	1.21328	1.24974	1.02054	1.07114	0.959214	0.991601	0.954073	1.00835
C14512	98996.8	98698.3	96295.1	215007	99271.5	103404	215672	272036	211087	203973	214951	217933	131484	1.63523	0.755009	0.786437	1.6403	2.06897	1.60542	1.55132	1.63481	1.65749
C14519	627099	293667	315176	417070	714043	691244	349865	422561	343600	401501	413518	393287	407251	1.02411	1.75332	1.69734	0.859088	1.03759	0.843705	0.985881	1.01539	0.965711
C14526	298965	378664	346095	370568	387033	363294	345938	347026	366759	352024	388849	379756	350581	1.05701	1.10398	1.03626	0.986758	0.989859	1.04615	1.00412	1.10916	1.08322
C14533	382537	369323	368396	1.10693e+06	375900	383290	1.04982e+06	1.72051e+06	933110	1.00493e+06	1.05138e+06	1.05031e+06	595680	1.85826	0.631044	0.643448	1.76239	2.88831	1.56646	1.68703	1.76502	1.7632
C14537	103684	116411	115104	117592	107596	108986	116027	114548	116594	119124	116059	112637	111413	1.05547	0.965739	0.978223	1.04141	1.02814	1.04651	1.06921	1.04171	1.01099
C14543	655090	554234	572106	611569	614556	697041	619667	736822	539703	596489	563580	617318	587371	1.0412	1.04628	1.18671	1.05498	1.25444	0.918846	1.01552	0.959496	1.05098
C14561	335276	288945	279863	434008	338057	399477	397517	439746	365486	378099	416921	480788	320556	1.35392	1.0546	1.2462	1.24008	1.37182	1.14016	1.17951	1.30062	1.49985
C14574	358239	313528	333590	323225	350138	323688	315554	296878	300400	322710	325501	322824	320654	1.00802	1.09195	1.00946	0.984096	0.925852	0.936838	1.00641	1.01512	1.00677
C14592	535513	608222	580621	635210	589210	551145	488432	466351	500073	547287	543883	582176	559449	1.13542	1.0532	0.985156	0.873058	0.833589	0.893866	0.97826	0.972175	1.04062
C14596	3.95097e+07	2.65796e+06	2.67486e+06	2.64744e+06	2.67929e+07	1.65149e+07	2.54764e+06	2.61877e+06	2.76831e+06	2.67536e+06	2.62052e+06	2.66696e+06	1.18612e+07	0.223202	2.25887	1.39235	0.214788	0.220785	0.233392	0.225556	0.220932	0.224848
C14602	595256	484251	466596	606143	617359	586132	605304	607578	493279	561304	614505	604116	514291	1.1786	1.20041	1.13969	1.17697	1.18139	0.959144	1.09141	1.19486	1.17466
C14642	6.12884e+06	2.04358e+06	1.83381e+06	6.87518e+06	7.31178e+06	6.38836e+06	6.73818e+06	7.10243e+06	6.15443e+06	6.45504e+06	6.89265e+06	6.85262e+06	4.39132e+06	1.56563	1.66505	1.45477	1.53443	1.61738	1.4015	1.46996	1.56961	1.56049
C14689	781496	700797	730869	831119	780555	770268	812024	750017	724994	709369	777988	738064	730508	1.13773	1.06851	1.05443	1.11159	1.02671	0.992451	0.971062	1.065	1.01034
C14701	1.13726e+06	910453	972650	1.0526e+06	1.17672e+06	1.06428e+06	973348	1.06227e+06	991742	1.04009e+06	997972	1.05278e+06	1.00416e+06	1.04824	1.17184	1.05987	0.969313	1.05787	0.987632	1.03578	0.993836	1.04841
C14702	1.70196e+06	1.46213e+06	1.65216e+06	735736	1.82531e+06	1.75763e+06	1.64202e+06	730220	730840	1.56387e+06	925632	793905	2.07225e+06	0.355043	0.880838	0.848175	0.792384	0.35238	0.35268	0.754673	0.44668	0.383113
C14704	431138	405844	390107	460485	432470	426771	449905	415551	422476	439817	414112	408928	402343	1.14451	1.07488	1.06071	1.11822	1.03283	1.05004	1.09314	1.02925	1.01637
C14713	2.75744e+06	3.03182e+06	1.99104e+06	1.96884e+06	1.33542e+06	1.28778e+06	1.40879e+06	1.19812e+06	1.38455e+06	1.33325e+06	1.7459e+06	3.3374e+06	2.37458e+06	0.82913	0.562381	0.542317	0.593281	0.50456	0.583071	0.561467	0.735246	1.40547
C14744	261401	304097	298929	303230	269257	273508	263601	268479	291879	299156	257680	259398	293225	1.03412	0.918262	0.932759	0.898971	0.915607	0.995408	1.02023	0.87878	0.884637
C14752	588264	594949	601804	2.43465e+07	592125	601981	2.31939e+07	2.32452e+07	2.24397e+07	8.18596e+07	1.41214e+07	5.58455e+07	7.76824e+06	3.1341	0.0762238	0.0774926	2.98573	2.99234	2.88865	10.5377	1.81784	7.18895
C14758	3.58306e+06	1.16875e+06	1.08657e+06	2.63247e+06	3.42273e+06	3.13651e+06	2.87577e+06	3.23198e+06	3.04371e+06	2.8902e+06	2.96668e+06	2.96224e+06	2.34461e+06	1.12277	1.45983	1.33775	1.22655	1.37847	1.29817	1.2327	1.26532	1.26342
C14765	494773	483997	461535	502442	502697	486517	511913	487180	494476	515665	523775	457140	484824	1.03634	1.03686	1.00349	1.05587	1.00486	1.01991	1.06361	1.08034	0.942899
C14767	780001	759957	781045	800875	769830	787237	805793	777534	793408	796169	790823	797873	768944	1.04153	1.00115	1.02379	1.04792	1.01117	1.03182	1.03541	1.02845	1.03762
C14774	1.72811e+09	4.23276e+08	3.67349e+08	2.5389e+09	1.69393e+09	1.81371e+09	2.72713e+09	1.57623e+09	2.35337e+09	2.63693e+09	2.75743e+09	2.94204e+09	1.38322e+09	1.8355	1.22463	1.31123	1.97158	1.13954	1.70137	1.90637	1.99348	2.12695
C14788	1.35022e+06	1.17061e+06	1.16801e+06	1.32822e+06	1.24741e+06	1.60841e+06	1.2977e+06	2.02692e+06	1.23356e+06	1.2686e+06	1.79591e+06	1.21643e+06	1.20542e+06	1.10187	1.03483	1.33432	1.07655	1.6815	1.02334	1.05241	1.48986	1.00913
C14796	173558	184670	183779	207886	196946	1.02687e+06	178859	181604	197670	199900	187375	187241	182244	1.1407	1.08068	5.63463	0.981429	0.99649	1.08465	1.09688	1.02816	1.02742
C14826	1.90477e+06	1.09271e+06	1.10837e+06	1.45892e+06	1.56587e+06	1.68355e+06	1.40184e+06	1.58074e+06	1.35556e+06	1.43368e+06	1.43939e+06	1.38623e+06	1.37837e+06	1.05844	1.13603	1.22141	1.01703	1.14682	0.983452	1.04013	1.04427	1.0057
C14841	219348	206329	197781	216419	213344	212130	209568	206129	207573	219760	209952	207519	207647	1.04224	1.02744	1.02159	1.00925	0.992689	0.999642	1.05833	1.0111	0.999384
C14843	1.77112e+06	2.91767e+06	2.13689e+06	1.35552e+06	1.80245e+06	3.0687e+06	2.30744e+06	1.91624e+06	1.35105e+06	7.1252e+06	4.35496e+06	3.93525e+06	2.3642e+06	0.573351	0.762393	1.29799	0.975993	0.810524	0.57146	3.01379	1.84205	1.66452
C14846	80310.6	111339	3.03779e+06	159393	120917	72418.9	1.38857e+06	855014	2.19765e+06	109867	50448.2	500415	585081	0.272428	0.206667	0.123776	2.3733	1.46136	3.75614	0.187781	0.0862243	0.855291
C14852	3.24079e+06	2.39654e+06	2.55909e+06	2.47506e+06	1.69809e+08	3.0504e+06	2.95344e+06	3.24752e+06	3.19105e+06	2.27288e+08	2.89062e+06	2.51148e+06	2.87593e+06	0.860611	59.0448	1.06066	1.02695	1.12921	1.10957	79.0312	1.00511	0.873277
C14853	7.47378e+06	8.36975e+06	7.93888e+06	6.01559e+06	6.2796e+06	6.48601e+06	7.25174e+06	7.61636e+06	8.13505e+06	7.1446e+06	8.6072e+06	8.13701e+06	2.11439e+07	0.284507	0.296993	0.306756	0.342971	0.360216	0.384747	0.337904	0.407078	0.38484
C14860	3.49115e+06	3.20596e+06	3.26498e+06	3.94669e+06	3.48694e+06	3.64894e+06	3.62752e+06	3.35052e+06	3.44822e+06	3.16894e+06	3.47548e+06	3.29713e+06	3.2822e+06	1.20245	1.06238	1.11174	1.10521	1.02082	1.05058	0.965492	1.05889	1.00455
C14863	235561	214330	204090	226401	220240	221062	224777	247256	222101	219238	215651	208599	218987	1.03386	1.00573	1.00948	1.02644	1.12909	1.01422	1.00115	0.984768	0.952566
C14866	3.23519e+06	3.44847e+06	2.92694e+06	3.4991e+06	3.70384e+06	3.35506e+06	3.71724e+06	3.71725e+06	3.56291e+06	3.24802e+06	3.24122e+06	3.49298e+06	3.25583e+06	1.07472	1.1376	1.03048	1.14172	1.14172	1.09432	0.997602	0.995513	1.07284
C14922	801640	893729	875337	878021	826102	882326	880422	862998	856063	899000	863794	847449	853438	1.0288	0.96797	1.03385	1.03162	1.0112	1.00308	1.05339	1.01213	0.992982
C14923	695194	761215	744193	900094	630856	1.23523e+06	747583	2.72784e+06	753850	754453	741578	1.03042e+06	730509	1.23215	0.863584	1.69092	1.02337	3.73416	1.03195	1.03278	1.01515	1.41055
C14960	121784	127241	128247	129140	122995	127816	134698	138707	123561	127655	138742	121622	124323	1.03875	0.98932	1.0281	1.08346	1.1157	0.993874	1.02681	1.11598	0.978278
C14973	184685	215911	208843	220283	208515	216448	207647	209231	214841	208187	207278	212968	205453	1.07218	1.01491	1.05352	1.01068	1.01839	1.04569	1.01331	1.00889	1.03658
C15021	2.34268e+06	1.83511e+07	6.4871e+06	1.71004e+06	3.69771e+06	3.0838e+06	1.40576e+06	3.37478e+06	3.27233e+06	2.129e+06	3.16791e+06	2.44354e+06	7.09264e+06	0.2411	0.521344	0.434789	0.198199	0.475814	0.46137	0.30017	0.446647	0.344517
C15025	727024	312891	298812	473635	790096	1.01006e+06	417670	533873	425891	436970	495630	515863	457683	1.03485	1.7263	2.2069	0.912575	1.16647	0.930538	0.954744	1.08291	1.12712
C15032	125434	137582	136366	145506	129204	129003	120952	126163	2.56088e+06	143550	123648	124473	552295	0.263456	0.23394	0.233576	0.218999	0.228435	4.63679	0.259916	0.223881	0.225373
C15066	464841	379252	386468	4.18776e+07	479168	478091	1.75555e+07	441346	2.5557e+07	2.47559e+07	7.39595e+06	1.76763e+07	8.27735e+06	5.0593	0.0578891	0.0577589	2.12091	0.0533197	3.08759	2.9908	0.893517	2.1355
C15084	1.23687e+06	1.30335e+06	1.26194e+06	1.3317e+06	1.33899e+06	1.33157e+06	1.17987e+06	1.08793e+06	1.05014e+06	1.05973e+06	1.20708e+06	1.25442e+06	1.22659e+06	1.0857	1.09164	1.08559	0.961914	0.886961	0.856153	0.863966	0.984097	1.02269
C15112	304929	296919	288398	1.16711e+06	296492	312298	1.21662e+06	1.37503e+06	825166	1.25887e+06	1.24931e+06	1.45493e+06	493064	2.36705	0.601326	0.633382	2.46747	2.78875	1.67355	2.55316	2.53378	2.95079
C15117	873046	414012	409517	615677	708372	726308	655347	727495	578393	617740	642447	641732	573709	1.07315	1.23472	1.26599	1.1423	1.26806	1.00816	1.07675	1.11981	1.11857
C15145	2.60197e+06	2.50402e+06	2.55482e+06	1.29459e+07	2.64656e+06	2.77041e+06	1.16118e+07	2.27763e+07	9.51722e+06	1.44596e+07	1.43019e+07	1.80081e+07	5.69463e+06	2.27336	0.464747	0.486496	2.03908	3.99961	1.67126	2.53916	2.51147	3.1623
C15147	1.69311e+07	762686	797122	852003	6.33038e+06	1.33395e+07	855734	846531	810333	825160	827222	854481	4.83924e+06	0.176061	1.30813	2.75652	0.176832	0.174931	0.167451	0.170514	0.17094	0.176573
C15152	824736	895999	873805	911185	872822	865449	859094	868245	884220	877158	865962	882511	858531	1.06133	1.01665	1.00806	1.00066	1.01131	1.02992	1.0217	1.00866	1.02793
C15182	839281	757666	731074	883675	784434	797554	842766	910936	774798	766324	859265	854562	775337	1.13973	1.01173	1.02865	1.08697	1.17489	0.999305	0.988376	1.10825	1.10218
C15202	1.7851e+06	1.47114e+06	1.03202e+06	2.08387e+06	2.19844e+06	2.62684e+06	1.07389e+07	1.51542e+06	1.61483e+06	1.42849e+06	1.22771e+07	1.07619e+07	1.62348e+06	1.28358	1.35416	1.61804	6.61475	0.93344	0.994672	0.879898	7.56226	6.6289
C15214	1.03363e+08	7.50352e+07	7.57226e+07	1.06488e+08	1.10463e+08	7.76142e+07	1.03149e+08	7.66922e+07	1.05183e+08	1.09596e+08	1.07905e+08	7.74078e+07	9.09348e+07	1.17103	1.21475	0.853515	1.13432	0.843376	1.15668	1.20522	1.18662	0.851244
C15230	43764.8	34996.7	36201.2	39002.9	53424.3	37354.2	34776.3	42315.1	36501.2	37143.1	38256.4	38352.8	37445.9	1.04158	1.42671	0.997551	0.928709	1.13004	0.974772	0.991915	1.02165	1.02422
C15309	320826	374743	391982	395286	358680	343072	426455	1.20246e+06	373551	885567	1.38782e+06	511790	372227	1.06195	0.963607	0.921675	1.14568	3.23046	1.00356	2.37911	3.72844	1.37494
C15322	769609	634226	643185	652733	729279	690630	641251	643166	650646	621018	625132	622265	665673	0.980561	1.09555	1.03749	0.963313	0.966189	0.977425	0.932917	0.939098	0.934792
C15346	192550	197408	200735	200372	203776	198056	199270	199935	203092	204788	200103	201699	195929	1.02268	1.04005	1.01086	1.01705	1.02045	1.03656	1.04522	1.0213	1.02945
C15358	905119	374171	315230	601976	1.03061e+06	997703	504975	609901	511799	579504	596849	567648	552101	1.09034	1.86671	1.8071	0.914642	1.10469	0.927002	1.04963	1.08105	1.02816
C15381	97022.5	96170.2	95104	92270.2	98463.8	92277.5	96251.2	109013	93864.6	102326	100722	97942.5	94651.9	0.974837	1.04027	0.974915	1.0169	1.15172	0.991682	1.08108	1.06413	1.03476
C15390	603905	504211	468077	501143	670843	610874	506410	489058	531311	517242	518512	499652	520048	0.963648	1.28996	1.17465	0.973775	0.940409	1.02166	0.994605	0.997046	0.960781
C15424	811288	209453	207416	725043	1.40052e+06	946526	309121	651637	263408	380309	1.19415e+06	1.19566e+06	428205	1.69322	3.27067	2.21045	0.721901	1.52179	0.615145	0.888147	2.78875	2.79227
C15481	80872	80571.4	79323.3	82257.9	80428.2	81410.4	80064.3	79518.1	86019.7	79494.2	85660.5	81051.2	79996.1	1.02828	1.0054	1.01768	1.00085	0.994026	1.0753	0.993726	1.07081	1.01319
C15485	997684	921913	950332	1.02756e+06	1.02494e+06	1.03803e+06	941160	961978	965157	947269	990352	978366	963015	1.06702	1.0643	1.0779	0.977306	0.998924	1.00222	0.983649	1.02839	1.01594
C15486	1.00684e+06	1.11986e+06	1.07503e+06	1.21414e+06	1.03311e+06	998662	984113	821234	1.05879e+06	1.02353e+06	1.06226e+06	993730	1.06814e+06	1.13668	0.967208	0.934954	0.921333	0.768845	0.991242	0.958237	0.994496	0.930336
C15493	242857	261997	265771	266197	255348	254765	261296	263903	256836	260205	263385	268419	255663	1.0412	0.998768	0.996488	1.02203	1.03223	1.00459	1.01776	1.03021	1.04989
C15494	2.5482e+06	1.47826e+06	2.77136e+06	3.17046e+06	2.60427e+06	3.22246e+06	2.00035e+06	2.59757e+06	2.91059e+06	1.97869e+06	1.73227e+06	1.7901e+06	2.338e+06	1.35606	1.11388	1.3783	0.855582	1.11102	1.24491	0.846315	0.740918	0.765655
C15497	75107.8	73548	74240.8	80915.1	78620.8	74043.2	76907	78289	78311.5	73658.1	72434.3	71084.9	73770.4	1.09685	1.06575	1.0037	1.04252	1.06125	1.06156	0.998477	0.981889	0.963596
C15502	4.58022e+07	2.14678e+06	2.08622e+06	4.53478e+06	1.7865e+08	2.43346e+08	2.30842e+06	2.62846e+06	4.70611e+07	3.1345e+06	2.30198e+06	2.2178e+06	1.30349e+07	0.347895	13.7055	18.6688	0.177095	0.201648	3.61039	0.24047	0.176601	0.170143
C15503	68860.6	78425.2	73821	81503.1	76527.1	75725.4	75258	70464.8	72679.1	80064.5	67044.5	69583.5	73410.6	1.11024	1.04245	1.03153	1.02517	0.959872	0.990036	1.09064	0.913281	0.947867
C15514	213901	50118.2	47531.1	69073.1	188538	169384	68956.5	79562	68212.2	72862.9	79573.3	75103.8	96381.9	0.716661	1.95616	1.75743	0.715451	0.825487	0.707728	0.755981	0.825605	0.779231
C15545	2.24756e+06	405489	395464	1.15752e+08	375474	640641	9.06661e+06	1.45132e+08	7.23092e+06	9.09978e+06	1.12199e+07	1.32124e+07	3.24282e+06	35.695	0.115786	0.197557	2.7959	44.7548	2.22982	2.80613	3.45992	4.07437
C15546	218860	210093	214750	226388	222347	224880	220466	214122	218727	218510	213606	209963	212289	1.06641	1.04738	1.05931	1.03852	1.00863	1.03033	1.0293	1.0062	0.989043
C15556	1.571e+08	1.86046e+08	1.77539e+08	1.031e+08	1.68352e+08	1.69615e+08	6.75727e+07	9.97593e+07	1.08898e+08	9.08404e+07	1.00809e+08	8.69963e+07	1.41924e+08	0.726445	1.18622	1.19511	0.47612	0.702907	0.767299	0.640064	0.710303	0.612979
C15561	440835	290254	269985	449164	509015	462136	347095	339045	335679	396264	361067	379013	351579	1.27756	1.44779	1.31446	0.987245	0.964349	0.954773	1.1271	1.02699	1.07803
C15562	1.33022e+08	1.52876e+08	1.49577e+08	1.25481e+08	1.21429e+08	1.24333e+08	1.38731e+08	1.37799e+08	1.41764e+08	1.40249e+08	1.39122e+08	1.35931e+08	1.44816e+08	0.866485	0.838501	0.858557	0.95798	0.951542	0.978921	0.968462	0.960679	0.93864
C15571	750723	867303	907200	917245	830128	817893	933767	841492	956466	909747	836016	892895	847840	1.08186	0.979109	0.964678	1.10135	0.992513	1.12812	1.07302	0.986054	1.05314
C15572	545360	534990	536586	589752	582070	536960	560009	546461	567808	557470	569269	562369	541925	1.08825	1.07408	0.990838	1.03337	1.00837	1.04776	1.02868	1.05046	1.03773
C15584	2.18013e+06	2.28125e+06	2.30675e+06	2.53099e+06	2.34059e+06	2.26885e+06	2.40258e+06	2.16882e+06	2.29503e+06	2.34708e+06	2.36947e+06	2.29228e+06	2.26395e+06	1.11795	1.03385	1.00216	1.06123	0.95798	1.01373	1.03672	1.04661	1.01251
C15602	2.59234e+06	2.8581e+06	2.79845e+06	2.76e+07	2.54239e+06	2.5241e+06	2.4601e+07	2.74149e+07	1.77561e+07	2.59696e+07	2.87977e+07	2.96437e+07	8.86164e+06	3.11455	0.286898	0.284834	2.77613	3.09366	2.0037	2.93057	3.24971	3.34517
C15603	1.22072e+06	816255	822894	985850	1.19545e+06	1.1766e+06	974549	1.0805e+06	901910	876067	855705	945917	947812	1.04013	1.26127	1.24138	1.02821	1.13999	0.95157	0.924304	0.902821	0.998
C15604	2.8121e+06	2.50489e+06	2.61133e+06	1.10942e+06	2.16199e+07	5.29565e+06	1.33842e+06	4.04814e+06	1.02695e+06	502518	1.83295e+06	1.65159e+06	1.91644e+06	0.578895	11.2813	2.76327	0.698387	2.11232	0.535863	0.262215	0.956436	0.8618
C15607	2.71796e+06	1.9504e+06	2.03695e+06	1.925e+06	2.63733e+06	2.35832e+06	2.06743e+06	2.60016e+06	1.85052e+06	1.92193e+06	2.13793e+06	2.31321e+06	2.10728e+06	0.913497	1.25153	1.11913	0.98109	1.23389	0.878152	0.912041	1.01454	1.09772
C15612	1.02412e+06	1.13149e+06	1.15981e+06	1.14869e+06	1.09712e+06	1.11208e+06	1.09374e+06	1.0977e+06	1.15128e+06	1.12999e+06	1.08912e+06	1.11347e+06	1.09286e+06	1.05109	1.00391	1.01759	1.00081	1.00443	1.05346	1.03398	0.996585	1.01886
C15617	1.03195e+06	954714	955808	1.05781e+06	1.02191e+06	977964	965088	992592	989002	1.01864e+06	955028	992407	980701	1.07862	1.04202	0.997208	0.98408	1.01212	1.00846	1.03868	0.973821	1.01194
C15622	307185	267521	283386	1.02049e+06	315999	315010	793585	887178	598129	1.03758e+06	1.04082e+06	1.05397e+06	430633	2.36974	0.733802	0.731505	1.84284	2.06017	1.38895	2.40943	2.41696	2.44748
C15626	2.15147e+07	538713	460202	1.18123e+07	2.38154e+07	2.42375e+07	1.61932e+07	1.41659e+07	1.43509e+07	1.3065e+07	1.46141e+07	1.6749e+07	1.01109e+07	1.16827	2.35543	2.39718	1.60157	1.40106	1.41936	1.29218	1.44539	1.65654
C15656	419970	399007	416209	367078	399636	428749	391539	367525	370296	360192	392124	380044	392600	0.934993	1.01792	1.09208	0.997298	0.936132	0.943188	0.917453	0.998787	0.968019
C15668	1.70554e+06	1.19907e+06	969742	1.25967e+06	1.65072e+06	1.62389e+06	1.25441e+06	1.4551e+06	1.21328e+06	1.23039e+06	1.26196e+06	1.2599e+06	3.25456e+06	0.387047	0.507202	0.498959	0.385433	0.447096	0.372795	0.37805	0.387751	0.387119
C15679	584400	516744	544561	626964	567563	591886	610358	690385	571989	582237	593697	624611	564972	1.10973	1.00459	1.04764	1.08033	1.22198	1.01242	1.03056	1.05084	1.10556
C15689	141594	150628	151453	162032	157830	155668	156133	152094	151100	145557	151904	146352	147786	1.0964	1.06796	1.05334	1.05648	1.02915	1.02243	0.984919	1.02787	0.990299
C15694	127525	131129	121861	139357	153467	144135	140164	167954	125279	140351	143947	136647	128617	1.08351	1.19322	1.12065	1.08978	1.30585	0.974049	1.09124	1.11919	1.06243
C15698	633375	672576	695584	750700	646861	664746	715456	734649	717743	766126	721573	734138	681617	1.10135	0.949009	0.975249	1.04965	1.0778	1.053	1.12398	1.05862	1.07705
C15700	2.57075e+06	1.76002e+06	1.70399e+06	1.90893e+06	2.48812e+06	2.44769e+06	1.89206e+06	2.19327e+06	1.82878e+06	1.85456e+06	1.90214e+06	1.89904e+06	1.94734e+06	0.980278	1.2777	1.25694	0.971612	1.12629	0.939117	0.952355	0.976793	0.9752
C15719	317319	336593	335727	357390	328185	336019	323138	343605	336993	333157	336276	338211	330540	1.08123	0.992876	1.01658	0.977607	1.03953	1.01953	1.00792	1.01735	1.02321
C15724	1.31422e+06	1.44895e+06	1.41871e+06	1.42928e+06	1.22968e+06	1.27963e+06	1.42301e+06	1.5166e+06	1.43493e+06	1.43608e+06	1.41158e+06	1.41427e+06	1.39978e+06	1.02107	0.878478	0.914161	1.01659	1.08345	1.02511	1.02593	1.00843	1.01035
C15725	1.4357e+06	1.69809e+06	1.64313e+06	1.74357e+06	1.46798e+06	1.45816e+06	1.61913e+06	1.555e+06	1.67015e+06	1.65982e+06	1.68275e+06	1.64647e+06	1.59138e+06	1.09563	0.922458	0.916289	1.01744	0.977139	1.0495	1.043	1.05742	1.03462
C15730	761227	598214	584915	616796	738204	707620	607988	597943	530795	640367	579073	587850	626147	0.985065	1.17896	1.13012	0.970998	0.954956	0.847716	1.02271	0.924819	0.938837
C15738	355618	429019	438035	474135	402659	381799	418274	465532	434780	469011	443846	433593	415836	1.1402	0.968313	0.918149	1.00586	1.11951	1.04556	1.12788	1.06736	1.0427
C15739	1.13811e+06	1.16562e+06	1.15248e+06	1.34454e+06	1.20893e+06	1.18028e+06	1.28551e+06	1.39392e+06	1.2729e+06	1.31052e+06	1.29778e+06	1.26888e+06	1.18473e+06	1.13489	1.02043	0.996242	1.08506	1.17657	1.07442	1.10617	1.09542	1.07102
C15746	283990	300353	282555	267096	319993	302525	270017	263321	217322	263558	288469	279648	274833	0.971848	1.16432	1.10076	0.982476	0.95811	0.79074	0.958974	1.04962	1.01752
C15747	1.34936e+07	1.35121e+06	1.32823e+06	1.40891e+06	9.22155e+06	4.22138e+06	1.3696e+06	1.5308e+06	1.34872e+06	1.38251e+06	1.37128e+06	1.35465e+06	4.38914e+06	0.321	2.10099	0.961779	0.312043	0.348769	0.307285	0.314985	0.312425	0.308637
C15758	509641	646527	603249	638456	538130	543734	616464	574480	608618	631957	582680	570987	586784	1.08806	0.917085	0.926635	1.05058	0.979031	1.03721	1.07698	0.993006	0.97308
C15760	538117	460144	471423	487071	597448	552248	502537	527454	462570	488288	469808	496533	479519	1.01575	1.24593	1.15167	1.048	1.09996	0.964653	1.01829	0.979748	1.03548
C15767	1.06145e+06	1.07386e+06	1.08296e+06	1.14283e+06	1.01641e+06	1.14272e+06	1.01253e+06	933637	901207	869808	1.033e+06	1.07651e+06	1.04146e+06	1.09733	0.975945	1.09722	0.972221	0.896466	0.865327	0.835178	0.991875	1.03365
C15808	221405	153686	148671	177727	209342	214734	171261	208466	171781	165722	165582	173462	171544	1.03605	1.22034	1.25177	0.998354	1.21524	1.00138	0.966064	0.965247	1.01118
C15809	288517	235223	190083	319431	326690	320470	297673	282927	272796	318766	286214	229156	255557	1.24994	1.27835	1.25401	1.1648	1.1071	1.06746	1.24734	1.11996	0.896695
C15823	908872	1.05001e+06	1.09831e+06	3.20888e+06	1.005e+06	990192	4.04354e+06	8.83742e+06	2.89159e+06	5.81109e+06	5.18029e+06	8.75166e+06	1.67921e+06	1.91095	0.5985	0.589678	2.40801	5.26286	1.722	3.46062	3.08496	5.21178
C15846	2.95998e+06	3.32553e+06	2.86015e+06	5.88486e+08	2.86416e+06	2.60118e+06	4.95066e+08	5.37212e+08	3.69068e+08	5.25898e+08	5.5267e+08	5.70836e+08	1.41249e+08	4.16631	0.0202774	0.0184156	3.50492	3.8033	2.61289	3.7232	3.91274	4.04135
C15849	525097	631694	613188	604795	536288	550765	562459	589844	571250	605027	565351	569086	589154	1.02655	0.910268	0.93484	0.954689	1.00117	0.969611	1.02694	0.959598	0.965938
C15850	1.76003e+09	2.69556e+06	2.64906e+06	1.00543e+08	1.65671e+09	1.29769e+09	1.29361e+08	2.69508e+08	7.70305e+07	1.55158e+08	1.47945e+08	1.58521e+08	4.71158e+08	0.213396	3.51625	2.75425	0.274559	0.572012	0.163492	0.329313	0.314003	0.33645
C15877	1.33438e+06	765493	776465	840846	1.0849e+06	1.05033e+06	928801	1.01773e+06	813013	1.00436e+06	1.00836e+06	971119	926629	0.907425	1.1708	1.1335	1.00234	1.09831	0.877388	1.08389	1.08821	1.04801
C15892	268150	199045	200568	249141	282427	269505	233921	250738	226422	235122	245299	245403	227704	1.09415	1.24033	1.18358	1.0273	1.10116	0.994372	1.03258	1.07727	1.07773
C15900	1.38087e+06	915037	881128	1.09874e+06	1.18202e+06	1.13011e+06	1.03348e+06	1.11182e+06	999350	1.02313e+06	1.01218e+06	1.07051e+06	1.04803e+06	1.04839	1.12785	1.07832	0.986115	1.06086	0.953548	0.976233	0.965793	1.02144
C15903	5.66182e+06	434352	432504	1.41592e+06	5.57798e+06	4.06503e+06	1.12305e+06	1.54795e+06	912912	1.10548e+06	1.10097e+06	1.33977e+06	1.91648e+06	0.738813	2.91053	2.12109	0.585998	0.807703	0.476349	0.576829	0.574475	0.699079
C15935	979292	334963	291836	988095	1.1092e+06	1.02279e+06	989922	1.11193e+06	883859	989865	967005	1.02561e+06	681709	1.44944	1.62709	1.50034	1.45212	1.63109	1.29653	1.45204	1.4185	1.50447
C15943	1.21971e+06	1.46651e+06	1.36835e+06	1.5058e+06	1.2497e+06	1.23335e+06	1.39832e+06	1.34294e+06	1.40199e+06	1.43347e+06	1.32169e+06	1.29517e+06	1.3592e+06	1.10785	0.919439	0.907407	1.02878	0.988036	1.03148	1.05464	0.972401	0.952888
C15970	461671	404474	377338	425573	486797	385391	418205	512732	375556	430816	431585	423355	408978	1.04058	1.19028	0.942329	1.02256	1.25369	0.91828	1.0534	1.05528	1.03515
C15971	108179	100185	92934	150482	117213	109677	136952	147418	122898	129310	144557	166702	107267	1.40287	1.09272	1.02247	1.27674	1.37431	1.14572	1.20549	1.34764	1.55408
C16038	337744	326582	330879	295208	321391	344804	306532	294849	285159	304568	315350	311983	315099	0.936873	1.01997	1.09427	0.972812	0.935733	0.904982	0.966577	1.0008	0.990111
C16146	1.27561e+06	1.23991e+06	1.192e+06	1.20018e+06	1.3113e+06	1.23833e+06	1.19769e+06	1.04723e+06	1.31284e+06	1.26876e+06	1.24275e+06	1.16442e+06	1.21862e+06	0.984861	1.07605	1.01617	0.982825	0.859356	1.07731	1.04114	1.0198	0.955517
C16147	216116	225377	225613	231519	232963	226125	223411	226255	223799	237099	227280	223357	221675	1.0444	1.05092	1.02007	1.00783	1.02066	1.00958	1.06958	1.02528	1.00759
C16150	2.84636e+07	2.72481e+07	2.71554e+07	1.59124e+07	2.04675e+07	1.78753e+07	2.5984e+07	2.5646e+07	2.67639e+07	3.03993e+07	3.1024e+07	2.82732e+07	2.8081e+07	0.566663	0.728875	0.636564	0.925326	0.913289	0.953097	1.08256	1.10481	1.00685
C16155	1.12298e+07	1.10926e+06	1.1104e+06	4.34182e+06	8.10037e+06	9.7215e+06	8.16123e+06	1.22898e+07	5.981e+06	8.37534e+06	1.04468e+07	7.28733e+06	5.67254e+06	0.76541	1.428	1.71378	1.43873	2.16655	1.05438	1.47647	1.84165	1.28467
C16159	756868	823352	828514	839817	740293	713019	812938	854367	859377	791040	826855	821069	817125	1.02777	0.905973	0.872594	0.994876	1.04558	1.05171	0.968077	1.01191	1.00483
C16185	151353	139758	509983	146271	155588	146930	147066	139528	145200	145728	150343	151310	206961	0.706754	0.751774	0.709938	0.710598	0.674173	0.701583	0.704132	0.726428	0.731101
C16223	1.29871e+06	1.23417e+06	1.25945e+06	5.61026e+06	1.3102e+06	1.38278e+06	5.79574e+06	9.59675e+06	4.75028e+06	6.87157e+06	6.99812e+06	6.87991e+06	2.81568e+06	1.99251	0.465322	0.491101	2.05838	3.40832	1.68708	2.44047	2.48541	2.44343
C16246	1.37858e+06	681587	643016	966098	1.56971e+06	1.51959e+06	893299	928933	787260	882636	909054	910205	899822	1.07365	1.74447	1.68877	0.992751	1.03235	0.874906	0.9809	1.01026	1.01154
C16250	384411	351371	342797	369464	363199	362098	366813	403496	362446	357775	353116	340413	361424	1.02225	1.00491	1.00187	1.01491	1.11641	1.00283	0.989903	0.977013	0.941865
C16280	952004	708149	711813	772226	787248	799961	766975	842245	803524	800119	798825	762986	792770	0.974085	0.993035	1.00907	0.967462	1.06241	1.01356	1.00927	1.00764	0.96243
C16308	1.04059e+06	611745	583428	909875	1.06866e+06	1.01853e+06	777080	780739	964744	791995	830027	823985	726955	1.25162	1.47005	1.40109	1.06895	1.07398	1.3271	1.08947	1.14179	1.13347
C16323	362299	211132	211609	274874	341673	311815	269860	295729	260358	268485	253401	259512	259560	1.059	1.31636	1.20132	1.03968	1.13935	1.00308	1.03439	0.976274	0.999818
C16365	761631	773530	759027	884206	768774	713561	710209	693356	801774	808006	760415	741766	768589	1.15043	1.00024	0.928404	0.924043	0.902115	1.04318	1.05129	0.989364	0.965101
C16366	1.20682e+06	315885	323720	349473	815411	2.26714e+06	343465	315322	296495	332171	325468	373827	538192	0.649346	1.51509	4.21252	0.638184	0.585891	0.550909	0.617199	0.604744	0.694598
C16392	4.78626e+06	832394	875045	833476	902875	834670	884022	1.7238e+06	782035	832148	901261	1.00156e+06	1.86378e+06	0.447196	0.484431	0.447836	0.474315	0.92489	0.419595	0.446483	0.483565	0.537381
C16395	2.89925e+06	2.93437e+06	2.82732e+06	1.37971e+06	2.53023e+06	1.45051e+06	2.62255e+06	2.8826e+06	2.95348e+06	2.17053e+06	1.72753e+06	2.97734e+06	2.86105e+06	0.48224	0.88437	0.506985	0.916639	1.00753	1.0323	0.758647	0.603811	1.04065
C16396	2.19841e+06	1.79182e+06	1.58195e+06	8.35152e+06	7.17465e+06	3.38655e+06	1.86627e+06	2.04296e+06	1.90255e+06	1.91084e+06	1.90716e+06	1.96548e+06	1.8658e+06	4.47609	3.84534	1.81506	1.00025	1.09495	1.01969	1.02414	1.02216	1.05342
C16407	580100	623229	632468	640145	597675	582164	598668	617693	641524	611824	613927	608669	612588	1.04498	0.975656	0.950336	0.977277	1.00833	1.04724	0.998752	1.00219	0.993603
C16408	512310	301179	287238	447957	526132	501449	382578	384379	474970	389921	408646	405671	357901	1.25162	1.47005	1.40109	1.06895	1.07398	1.3271	1.08947	1.14179	1.13347
C16415	564752	548097	559323	1.91938e+07	567726	582921	1.63521e+07	4.05807e+07	5.43112e+06	1.75299e+07	1.7671e+07	2.6618e+07	4.34436e+06	4.4181	0.130681	0.134179	3.76397	9.341	1.25015	4.03509	4.06757	6.12703
C16417	919837	436200	431465	649532	746337	799995	690470	775587	609391	680656	676879	706510	604456	1.07457	1.23472	1.32349	1.1423	1.28311	1.00816	1.12606	1.11981	1.16884
C16440	519875	418999	376617	565848	577254	579564	535281	518877	461101	509572	532425	554016	457284	1.23741	1.26235	1.2674	1.17057	1.13469	1.00835	1.11434	1.16432	1.21153
C16448	231610	163302	158780	180075	194322	202329	197615	215589	195624	194669	206724	199465	190479	0.945378	1.02018	1.06221	1.03747	1.13183	1.02701	1.022	1.08528	1.04718
C16449	460072	465450	441271	495345	440549	495293	438868	392180	350332	377006	410980	408771	444857	1.11349	0.990316	1.11338	0.986538	0.881588	0.787517	0.847477	0.923848	0.918884
C16450	1.13413e+06	1.18738e+06	1.23409e+06	2.59981e+07	1.22495e+06	1.03637e+06	2.4453e+07	2.17663e+07	7.67749e+06	2.52766e+07	2.87977e+07	1.65534e+07	7.61659e+06	3.41335	0.160827	0.136067	3.21049	2.85775	1.008	3.31862	3.78092	2.17334
C16476	5.03674e+06	5.18881e+06	5.4091e+06	5.23839e+06	5.28617e+06	5.20768e+06	5.31731e+06	5.32784e+06	5.34803e+06	5.27985e+06	5.17963e+06	5.27024e+06	5.24383e+06	0.998962	1.00807	0.993105	1.01401	1.01602	1.01987	1.00687	0.987756	1.00504
C16483	286481	236328	236970	255310	388103	257363	267066	329646	253133	243135	279256	259083	246928	1.03395	1.57173	1.04226	1.08156	1.33499	1.02513	0.984642	1.13092	1.04923
C16485	475392	290949	271228	450240	573716	525110	347927	339858	355133	422993	365226	419226	365851	1.23067	1.56817	1.43531	0.951007	0.928952	0.970705	1.15619	0.998293	1.1459
C16488	357330	337015	337080	514250	356755	365864	487842	1.03931e+06	470557	516000	528293	613245	396500	1.29697	0.899759	0.922733	1.23037	2.6212	1.18678	1.30139	1.33239	1.54664
C16517	571339	626637	586548	568285	643771	608628	543228	529755	504898	509506	580350	582712	580532	0.978904	1.10893	1.0484	0.935741	0.912534	0.869717	0.877654	0.999687	1.00376
C16521	1.61832e+06	1.71434e+06	1.6921e+06	1.86669e+06	1.79031e+06	6.68888e+06	1.78666e+06	1.73115e+06	1.73888e+06	1.79528e+06	1.81381e+06	1.83769e+06	1.71383e+06	1.08919	1.04463	3.90289	1.0425	1.01011	1.01462	1.04753	1.05834	1.07227
C16525	339063	92276.6	98091.1	141397	174928	164356	128090	145063	138347	125487	143897	138365	165071	0.856584	1.05971	0.995671	0.775967	0.878791	0.838105	0.760199	0.871728	0.838214
C16527	6.69419e+06	2.68671e+06	2.47414e+06	6.31527e+06	6.8284e+06	6.83949e+06	6.12535e+06	7.15034e+06	5.8239e+06	6.49117e+06	6.34044e+06	6.97433e+06	4.55557e+06	1.38627	1.49891	1.50135	1.34458	1.56958	1.27841	1.42489	1.3918	1.53095
C16533	401140	309550	278431	330197	383152	374784	341686	361701	330888	317066	324860	335890	330375	0.999463	1.15975	1.13442	1.03424	1.09482	1.00155	0.959715	0.983307	1.01669
C16536	455605	510196	301655	709709	403290	391199	329442	330601	321985	532184	368429	527947	401083	1.76948	1.0055	0.975357	0.821381	0.824271	0.802788	1.32687	0.918585	1.3163
C16538	550680	528659	437999	671535	561431	535094	555271	545358	540721	527011	535152	521167	517455	1.29777	1.08499	1.03409	1.07308	1.05392	1.04496	1.01847	1.0342	1.00717
C16542	2.0423e+06	2.0166e+06	2.05321e+06	2.005e+06	2.11973e+06	2.02338e+06	1.95583e+06	2.03359e+06	2.03067e+06	2.05198e+06	2.01303e+06	2.00634e+06	2.04207e+06	0.98185	1.03803	0.990849	0.957769	0.995849	0.994417	1.00485	0.98578	0.982506
C16543	410530	362903	384417	4.29896e+06	416888	421014	5.16484e+06	4.71955e+06	4.43964e+06	4.29486e+06	1.40911e+06	6.98297e+06	1.67973e+06	2.55931	0.248187	0.250643	3.0748	2.8097	2.64306	2.55687	0.838887	4.15719
C16546	1.2472e+06	591442	585022	880698	1.01196e+06	1.08471e+06	936205	1.05162e+06	826271	922898	917777	957954	819580	1.07457	1.23472	1.32349	1.1423	1.28311	1.00816	1.12606	1.11981	1.16884
C16547	707316	634070	578111	662742	745810	644768	689899	785546	582736	660043	661222	648613	631416	1.04961	1.18117	1.02115	1.09262	1.2441	0.922904	1.04534	1.04721	1.02724
C16562	4.7603e+06	3.09877e+07	1.13033e+07	1.05667e+10	7.35651e+06	7.74307e+06	7.50448e+08	1.17586e+10	5.72935e+08	7.58131e+08	7.45081e+08	8.24757e+08	2.05692e+08	51.3713	0.0357647	0.037644	3.64841	57.1661	2.7854	3.68576	3.62232	4.00967
C16563	574490	610046	630916	1.78384e+07	580205	602945	1.98706e+07	658254	1.06466e+07	9.76989e+06	8.8561e+06	9.12139e+06	3.23192e+06	5.51945	0.179523	0.186559	6.14821	0.203672	3.2942	3.02293	2.74019	2.82228
C16566	3.26143e+06	4.04228e+06	3.15144e+06	1.04613e+08	3.15585e+06	2.98707e+06	9.85159e+07	1.00424e+08	9.10614e+07	1.18122e+08	1.24978e+08	1.22672e+08	3.51987e+07	2.97206	0.089658	0.084863	2.79885	2.85307	2.58706	3.35586	3.55063	3.48511
C16589	106676	93485.4	98780.5	114104	111148	117341	104541	108669	104945	101953	106928	104460	101593	1.12315	1.09406	1.15502	1.02902	1.06965	1.033	1.00355	1.05252	1.02823
C16612	150432	171155	173082	166411	162580	165785	170685	166567	172786	168762	162210	168397	163737	1.01633	0.992937	1.01251	1.04243	1.01728	1.05527	1.03069	0.990674	1.02846
C16644	648780	646445	660105	695148	675438	687832	680037	677553	672780	639076	630108	637525	648851	1.07135	1.04097	1.06008	1.04806	1.04424	1.03688	0.984935	0.971113	0.982545
C16671	705176	408007	389053	503794	682510	622129	518653	597574	499340	502076	502235	520922	498089	1.01145	1.37026	1.24903	1.04129	1.19973	1.00251	1.00801	1.00832	1.04584
C16692	1.14848e+06	946965	960028	966056	1.16387e+06	1.05985e+06	936863	937942	963663	930384	926710	952917	995139	0.970774	1.16956	1.06503	0.941439	0.942523	0.96837	0.934929	0.931236	0.957572
C16712	3.02219e+06	3.79354e+06	3.1072e+06	9.80371e+06	3.12045e+06	2.96456e+06	1.46392e+07	1.18443e+07	1.12753e+07	1.5649e+07	1.27236e+07	1.48336e+07	5.1301e+06	1.91102	0.608264	0.577875	2.85359	2.30878	2.19786	3.05044	2.48018	2.89149
C16746	1.53203e+08	466090	498648	9.20523e+07	2.00326e+08	1.54556e+08	7.93191e+07	1.29862e+08	7.41971e+07	7.42741e+07	7.1481e+07	2.40896e+07	6.20982e+07	1.48237	3.22596	2.48889	1.27732	2.09124	1.19484	1.19608	1.1511	0.387928
C16765	324913	247065	265984	273336	325647	294749	299822	390875	277924	278756	294958	291093	274705	0.995015	1.18544	1.07297	1.09143	1.42289	1.01172	1.01475	1.07372	1.05965
C16766	459085	487498	504175	544125	463651	481823	518579	526022	520237	496412	523013	492919	494052	1.10135	0.938467	0.975249	1.04965	1.06471	1.053	1.00478	1.05862	0.997707
C16785	2.95973e+06	855999	826235	8.90823e+06	5.40588e+06	2.6905e+06	3.31814e+06	2.59197e+06	2.37479e+06	2.47387e+06	2.59006e+06	3.36751e+06	1.9362e+06	4.60088	2.792	1.38958	1.71374	1.33869	1.22652	1.27769	1.3377	1.73924
C16806	731874	802710	777204	727962	824658	820087	1.36581e+06	2.23325e+06	646765	652667	1.66468e+06	2.11825e+06	747958	0.973266	1.10255	1.09643	1.82605	2.98579	0.864707	0.872599	2.22563	2.83204
C16831	960951	1.06208e+06	1.54976e+06	3.02777e+06	2.49474e+06	3.88824e+06	1.74797e+06	2.20345e+06	1.88985e+06	1.04611e+06	1.03595e+06	1.74229e+06	1.18956e+06	2.5453	2.0972	3.26865	1.46944	1.85233	1.5887	0.879416	0.870869	1.46466
C16837	156423	144263	141537	140407	134881	141526	163233	128533	153281	142597	150246	133120	145230	0.966788	0.92874	0.974496	1.12396	0.885027	1.05543	0.981869	1.03454	0.916615
C16838	85440.4	87873.8	78500.2	90466.4	88794.8	86959.1	84633.9	85257.4	80465.5	83224	84595.5	85430	82471.6	1.09694	1.07667	1.05441	1.02622	1.03378	0.975675	1.00912	1.02575	1.03587
C16843	159277	109533	102828	124892	157312	147415	123312	139340	122935	117836	114325	118755	122846	1.01666	1.28056	1.19999	1.00379	1.13426	1.00072	0.959213	0.930636	0.966695
C16850	236443	173629	177577	233685	251125	239772	214113	232583	202744	207930	220173	207037	199326	1.17238	1.25987	1.20291	1.07419	1.16685	1.01715	1.04316	1.10459	1.03869
C16852	1.37679e+07	431993	440851	1.02814e+06	3.98086e+06	1.22296e+07	1.02842e+06	1.17537e+06	912810	1.07765e+06	1.01433e+06	1.15905e+06	3.9338e+06	0.261361	1.01196	3.10886	0.261433	0.298787	0.232043	0.273947	0.25785	0.294639
C16868	648726	707740	686996	727634	694972	693338	704519	695334	729275	715791	689904	697095	682079	1.06679	1.0189	1.01651	1.0329	1.01943	1.0692	1.04943	1.01147	1.02202
C16884	668068	507045	462520	695066	718812	759713	648500	675856	600320	611707	680586	678032	578792	1.20089	1.24192	1.31258	1.12044	1.1677	1.03719	1.05687	1.17587	1.17146
C16903	332609	362411	345953	365864	347945	365972	364302	353972	374772	349847	359491	342735	348959	1.04844	0.997094	1.04875	1.04397	1.01436	1.07397	1.00254	1.03018	0.982163
C16910	355983	293663	286806	317250	482260	331250	385361	409621	314545	305602	364944	373023	306421	1.03534	1.57385	1.08103	1.25762	1.33679	1.02651	0.997327	1.19099	1.21735
C16915	434434	461565	458736	463019	443131	467884	460242	472164	456414	471179	441962	443870	449124	1.03094	0.986656	1.04177	1.02475	1.0513	1.01623	1.04911	0.984053	0.988302
C16919	694689	573335	581244	584894	676145	641684	567219	567872	583445	563297	561072	539506	600461	0.974075	1.12604	1.06865	0.94464	0.945727	0.971662	0.938107	0.934403	0.898487
C16921	501996	561787	567859	628285	549069	540828	625662	589581	623460	608332	579505	644844	565135	1.11174	0.971571	0.956989	1.1071	1.04326	1.10321	1.07644	1.02543	1.14104
C16923	580350	357195	358013	455550	557610	514981	478921	487073	406988	454470	461701	510293	428273	1.06369	1.302	1.20246	1.11826	1.1373	0.9503	1.06117	1.07805	1.19151
C16924	1.3802e+06	1.79139e+06	1.81281e+06	1.23122e+06	3.10789e+06	1.32412e+06	1.63644e+06	1.21821e+06	1.61822e+06	1.3616e+06	1.7249e+06	1.21443e+06	1.91586e+06	0.642648	1.62219	0.691139	0.854156	0.635859	0.844644	0.710699	0.900329	0.633882
C16931	512437	521928	497211	508622	529089	541841	551220	514440	512833	512264	501365	502219	508864	0.999525	1.03975	1.06481	1.08324	1.01096	1.0078	1.00668	0.985264	0.986942
C16939	328004	189780	165440	238480	317461	287860	227395	279841	233335	220357	242696	242301	228508	1.04364	1.38928	1.25974	0.995129	1.22464	1.02112	0.964327	1.06209	1.06036
C16985	1.44737e+06	1.33693e+06	1.37594e+06	1.45203e+06	1.43678e+06	1.42566e+06	1.43999e+06	1.59479e+06	1.44818e+06	1.40247e+06	1.43477e+06	1.36895e+06	1.37814e+06	1.05362	1.04256	1.03448	1.04488	1.15721	1.05083	1.01766	1.04109	0.99333
C16993	3.6456e+06	3.15679e+06	3.25607e+06	3.13274e+06	3.44647e+06	3.35494e+06	3.05349e+06	3.09882e+06	3.13386e+06	3.09081e+06	3.10807e+06	3.15584e+06	3.28536e+06	0.953545	1.04904	1.02118	0.929422	0.943219	0.953884	0.940782	0.946034	0.960577
C16994	3.06619e+06	1.97192e+06	2.02827e+06	2.3777e+06	2.92565e+06	2.93571e+06	2.29757e+06	2.59681e+06	2.14908e+06	2.12129e+06	2.16994e+06	2.23889e+06	2.30254e+06	1.03264	1.27062	1.27499	0.997838	1.1278	0.933352	0.92128	0.942408	0.972357
C16996	1.8977e+08	1.96411e+08	1.89605e+08	1.24117e+08	2.00405e+08	1.93132e+08	1.03378e+08	1.17003e+08	1.20789e+08	1.04211e+08	1.14944e+08	1.02969e+08	1.64238e+08	0.755715	1.22021	1.17593	0.629444	0.712399	0.735452	0.634512	0.699867	0.626953
C17007	305932	314955	298565	324495	347073	322530	287483	299451	306536	307954	304015	307903	305325	1.06279	1.13673	1.05635	0.941563	0.980763	1.00397	1.00861	0.99571	1.00844
C17008	345330	384077	379815	378202	356051	374008	361464	357316	370444	379345	362023	382081	368055	1.02757	0.967384	1.01617	0.982091	0.970821	1.00649	1.03067	0.98361	1.03811
C17038	631791	716618	702665	760573	648343	667224	700844	746772	697443	752354	711985	695538	689491	1.10309	0.940321	0.967705	1.01647	1.08308	1.01153	1.09117	1.03262	1.00877
C17047	827038	824064	821890	4.31448e+06	844904	923293	3.86985e+06	7.59064e+06	3.1718e+06	4.81894e+06	4.76638e+06	6.00155e+06	1.88028e+06	2.2946	0.449351	0.491041	2.05813	4.03698	1.68688	2.56289	2.53494	3.19184
C17050	761995	356865	364064	502520	559714	592583	550877	625338	506371	549306	560246	576322	505361	0.994379	1.10755	1.17259	1.09007	1.23741	1.002	1.08696	1.10861	1.14042
C17101	1.19309e+06	1.12316e+06	1.16857e+06	1.20477e+06	1.18148e+06	1.15924e+06	1.12375e+06	1.15344e+06	1.09935e+06	1.1777e+06	1.17035e+06	1.14137e+06	1.13625e+06	1.06031	1.03981	1.02023	0.988995	1.01513	0.967521	1.03648	1.03001	1.0045
C17103	213094	234445	225266	242715	237488	242753	230396	237672	232252	274984	221045	237144	224317	1.08201	1.05871	1.08218	1.0271	1.05953	1.03537	1.22587	0.985413	1.05718
C17167	483177	480087	473063	524913	516014	495079	504293	571918	471223	518547	520191	549233	476387	1.10186	1.08318	1.03924	1.05858	1.20053	0.989159	1.0885	1.09195	1.15291
C17168	881835	572208	539826	811062	1.11691e+06	985535	749945	732261	660923	740993	763156	764139	684584	1.18475	1.63152	1.43961	1.09548	1.06964	0.965437	1.0824	1.11477	1.11621
C17208	1.13954e+06	1.19783e+06	1.20084e+06	1.22279e+06	1.16917e+06	1.15805e+06	1.20233e+06	1.24768e+06	1.19724e+06	1.1485e+06	1.19658e+06	1.21595e+06	1.18109e+06	1.0353	0.989901	0.980492	1.01798	1.05638	1.01367	0.972405	1.01311	1.02951
C17220	1.81881e+06	2.02124e+06	2.06582e+06	1.98572e+06	1.88277e+06	1.99545e+06	1.99115e+06	1.95174e+06	2.00339e+06	2.03316e+06	1.95354e+06	1.98328e+06	1.94684e+06	1.01997	0.96709	1.02497	1.02276	1.00252	1.02905	1.04434	1.00344	1.01872
C17222	185242	181351	190061	189225	194546	194038	191147	186522	187295	182726	182149	185363	184089	1.0279	1.0568	1.05404	1.03834	1.01322	1.01742	0.992594	0.98946	1.00692
C17224	1.97539e+06	1.008e+07	9.58771e+06	2.28822e+06	1.00104e+06	987771	1.50598e+06	942020	5.68497e+06	2.4125e+06	6.01525e+06	1.42475e+06	7.2871e+06	0.31401	0.137372	0.135551	0.206664	0.129272	0.780141	0.331064	0.825465	0.195517
C17226	308792	230329	231586	284658	325108	317043	243568	254482	241506	270566	288857	266333	257733	1.10447	1.26142	1.23012	0.945043	0.987385	0.93704	1.04979	1.12076	1.03337
C17233	262731	175687	171835	202078	249427	248220	209714	222458	192416	182646	174446	197793	200331	1.00872	1.24507	1.23905	1.04684	1.11045	0.96049	0.911719	0.870788	0.987328
C17241	1.49099e+07	273806	254686	423711	2.12824e+06	3.49252e+06	701740	2.72702e+06	309514	373809	639956	901910	3.95516e+06	0.107129	0.538092	0.883027	0.177424	0.689483	0.0782557	0.0945116	0.161803	0.228034
C17251	446930	351222	343414	362131	430466	415456	339177	351063	311639	375971	339984	345137	363572	0.996037	1.18399	1.14271	0.932901	0.965594	0.857159	1.0341	0.935121	0.949295
C17309	603217	459815	456270	457722	622767	1.54846e+06	469215	450872	464866	447394	478026	460639	496657	0.921605	1.25392	3.11776	0.944747	0.907814	0.93599	0.900812	0.962487	0.927479
C17359	411334	945091	454713	273569	468363	738291	217988	253823	225378	263357	271240	251763	494359	0.553382	0.947416	1.49343	0.440951	0.513438	0.455899	0.532724	0.54867	0.509271
C17362	251225	207244	207807	223890	340341	225690	227523	2.54472e+06	209529	213214	226420	227199	216540	1.03395	1.57173	1.04226	1.05072	11.7518	0.967624	0.984642	1.04563	1.04923
C17370	733400	812508	828112	866219	748665	785641	844705	909531	827056	804297	846545	838384	808528	1.07135	0.92596	0.971692	1.04474	1.12492	1.02292	0.994767	1.04702	1.03693
C17391	1.67216e+07	1.39954e+06	1.31813e+06	3.0681e+06	1.63828e+07	1.5301e+07	2.88667e+06	4.23773e+06	2.2644e+06	2.85122e+06	2.83895e+06	3.25966e+06	5.54116e+06	0.553693	2.95657	2.76133	0.52095	0.764773	0.408651	0.514553	0.512339	0.588263
C17397	471400	361985	341500	513086	480951	527053	990626	716757	972435	462058	482780	483402	544164	0.94289	0.883836	0.968557	1.82046	1.31717	1.78703	0.849116	0.887197	0.88834
C17399	543837	540690	555408	574816	557166	537703	528444	552600	551718	547569	555439	559755	542452	1.05966	1.02713	0.991247	0.974178	1.01871	1.01708	1.00943	1.02394	1.0319
C17403	584521	496447	470932	557332	791866	543909	632758	672594	520406	521925	599233	612501	512645	1.08717	1.54467	1.06099	1.2343	1.31201	1.01514	1.0181	1.16891	1.19478
C17444	69935.4	61302.6	56878.2	68064.6	70003.6	74088.6	67494.3	69668.5	64531.4	63437.2	66259	68624.6	63915.9	1.06491	1.09525	1.15916	1.05599	1.09	1.00963	0.992512	1.03666	1.07367
C17450	1.11725e+06	1.18719e+06	936319	1.03408e+06	1.15601e+06	1.04555e+06	956218	1.04311e+06	953208	1.02179e+06	1.01041e+06	1.0203e+06	1.06313e+06	0.972671	1.08736	0.983461	0.899434	0.981166	0.896603	0.961112	0.95041	0.959708
C17452	278026	298755	303415	295503	283090	306010	300477	290254	296901	293471	285127	287704	292161	1.01144	0.968952	1.0474	1.02846	0.993473	1.01622	1.00448	0.975924	0.984746
C17476	407676	307158	296336	1.03135e+06	421559	385764	1.8854e+06	912489	1.29947e+06	1.10277e+06	1.00775e+06	1.28278e+06	565488	1.82382	0.745479	0.682179	3.33412	1.61363	2.29796	1.95012	1.78208	2.26844
C17489	2.16056e+06	334354	332684	1.4237e+06	3.5146e+06	1.31743e+06	836309	1.40763e+06	805098	907118	903431	919023	938114	1.51762	3.74646	1.40434	0.891479	1.50049	0.858209	0.966959	0.963029	0.979649
C17507	290345	301617	284604	300826	294658	276146	302172	330423	282797	299735	304383	295511	292923	1.02698	1.00593	0.942725	1.03158	1.12802	0.965433	1.02326	1.03912	1.00884
C17533	529043	381087	384070	486815	563019	536144	428947	399569	394989	437162	474519	505041	443288	1.09819	1.2701	1.20947	0.967649	0.901376	0.891045	0.98618	1.07045	1.13931
C17540	2.05877e+08	1.03444e+07	2.77994e+06	3.50617e+08	1.71319e+08	2.06087e+08	2.23767e+08	2.36771e+08	2.1106e+08	2.23685e+08	2.28363e+08	2.20504e+08	1.25435e+08	2.7952	1.36579	1.64297	1.78392	1.88759	1.68262	1.78326	1.82057	1.75791
C17547	648364	688492	712045	768465	654813	680477	732387	742899	734728	720545	738649	714342	699303	1.0989	0.936379	0.973079	1.04731	1.06234	1.05066	1.03038	1.05626	1.0215
C17569	3.45767e+06	2.46452e+06	2.18402e+06	3.03418e+06	3.29935e+06	3.27624e+06	2.83748e+06	2.58874e+06	3.00985e+06	2.85639e+06	2.72627e+06	2.80042e+06	2.72687e+06	1.1127	1.20994	1.20147	1.04057	0.949345	1.10378	1.0475	0.999782	1.02697
C17575	189473	109292	106414	142616	191347	177323	146151	169068	136504	140011	145541	150210	135781	1.05034	1.40923	1.30594	1.07637	1.24515	1.00532	1.03115	1.07188	1.10627
C17614	463077	483329	456959	3.63138e+07	519499	504883	6.36484e+07	1.12639e+08	4.51695e+07	3.17243e+07	7.18741e+07	6.24866e+07	1.34945e+07	2.69101	0.0384971	0.0374139	4.71661	8.34701	3.34725	2.3509	5.32617	4.63052
C17619	376085	416238	410843	441391	445974	432305	413070	412309	428708	431325	429710	436473	406820	1.08498	1.09625	1.06264	1.01536	1.01349	1.0538	1.06024	1.05627	1.07289
C17685	4.22097e+06	3.33765e+06	3.30829e+06	3.27241e+06	4.06239e+06	3.96383e+06	3.19327e+06	3.5555e+06	3.18765e+06	3.21109e+06	3.18499e+06	3.25299e+06	3.52752e+06	0.927679	1.15163	1.12369	0.905243	1.00793	0.903651	0.910296	0.902898	0.922174
C17702	162937	283327	176197	2.9468e+07	153503	147539	9.38073e+08	1.05363e+08	2.16928e+07	2.27179e+07	2.81982e+07	7.77723e+07	7.93946e+06	3.71159	0.0193342	0.018583	118.153	13.2708	2.73228	2.8614	3.55165	9.79567
C17703	910677	318446	303585	999880	1.09045e+06	1.17531e+06	1.08287e+06	1.26337e+06	1.04516e+06	1.18339e+06	1.25229e+06	826772	740828	1.34968	1.47193	1.58649	1.4617	1.70534	1.41079	1.59739	1.6904	1.11601
C17705	595557	495408	506981	548761	566765	560060	538679	544540	531052	572455	513001	503511	522473	1.05031	1.08477	1.07194	1.03102	1.04223	1.01642	1.09566	0.98187	0.963706
C17710	3.00806e+06	2.73053e+06	2.81334e+06	2.70973e+06	2.98109e+06	2.90192e+06	2.60758e+06	2.68038e+06	2.71069e+06	2.59102e+06	2.68838e+06	2.72971e+06	2.80491e+06	0.966065	1.06281	1.03459	0.929647	0.955603	0.966409	0.923745	0.958456	0.973189
C17715	452319	444691	439043	461775	456039	456515	463570	446873	455752	461694	463771	461482	444163	1.03965	1.02674	1.02781	1.04369	1.0061	1.02609	1.03947	1.04414	1.03899
C17770	251909	263960	252022	264701	264891	265989	260585	261066	265879	260897	256702	249469	257629	1.02745	1.02819	1.03245	1.01147	1.01334	1.03202	1.01268	0.9964	0.968327
C17816	707482	689301	708429	726415	694957	714046	732541	705245	719643	717343	717298	723692	697453	1.04153	0.996422	1.02379	1.05031	1.01117	1.03182	1.02852	1.02845	1.03762
C17854	1.87435e+06	2.10166e+06	2.03945e+06	2.09823e+06	1.96662e+06	1.98815e+06	2.02194e+06	2.05101e+06	2.03522e+06	2.04269e+06	2.03222e+06	2.06409e+06	2.01446e+06	1.04158	0.976249	0.986937	1.00371	1.01814	1.0103	1.01401	1.00881	1.02463
C17868	250018	245124	251926	258322	247135	252311	259908	250793	255914	249315	245924	257354	247442	1.04397	0.998758	1.01967	1.05038	1.01354	1.03424	1.00757	0.993863	1.04005
C17877	1.18608e+06	925840	956771	927044	1.12686e+06	1.04767e+06	995640	978058	871986	925567	1.02959e+06	1.114e+06	976729	0.949131	1.15371	1.07264	1.01936	1.00136	0.892761	0.947618	1.05412	1.14054
C17928	513670	374515	379145	500105	532725	505995	499047	490091	407961	468375	489147	511279	429049	1.16561	1.24164	1.17934	1.16315	1.14227	0.95085	1.09166	1.14007	1.19166
C17938	160758	128311	140535	145046	157123	145254	144032	136831	134803	144815	148358	152421	139269	1.04148	1.1282	1.04297	1.0342	0.982491	0.967935	1.03982	1.06526	1.09443
C17940	134859	139518	139323	143969	137294	136438	138059	139832	140879	136674	140468	133173	137712	1.04544	0.996971	0.990753	1.00252	1.0154	1.023	0.992463	1.02002	0.967042
C17944	591012	7.06494e+06	597213	2.7733e+09	615602	672716	2.27832e+09	1.15473e+09	6.31814e+08	9.63989e+08	9.56286e+08	1.45256e+09	2.8259e+08	9.81384	0.00217842	0.00238053	8.06228	4.08623	2.23579	3.41126	3.384	5.14015
C17948	1.54805e+07	1.32059e+07	1.2091e+07	1.77723e+07	1.70142e+07	1.67735e+07	1.64629e+07	1.48062e+07	1.44819e+07	1.54461e+07	1.66675e+07	1.50876e+07	1.4249e+07	1.24727	1.19406	1.17717	1.15537	1.0391	1.01635	1.08401	1.16973	1.05886
C17950	140738	112541	116415	125424	171800	120122	116391	161943	117379	119444	126842	127278	120417	1.04158	1.42671	0.997551	0.966566	1.34485	0.974772	0.991915	1.05335	1.05698
C17954	51721.1	60160.3	51855.6	142323	50812.6	50377.7	125609	125621	111779	4.06411e+06	3.2317e+06	2.94263e+06	1.0985e+06	0.129561	0.0462563	0.0458603	0.114346	0.114357	0.101756	3.69969	2.94191	2.67877
C17958	4.06943e+06	537109	549542	4.95167e+07	4.2635e+06	6.52007e+06	9.44954e+06	2.66948e+07	1.00389e+07	4.54011e+07	1.14065e+07	4.76077e+07	4.89828e+06	10.109	0.870406	1.33109	1.92915	5.44983	2.04947	9.26878	2.32868	9.71926
C17967	1.56477e+06	1.57725e+06	1.52075e+06	1.64535e+06	1.61142e+06	1.58248e+06	1.53115e+06	1.56069e+06	1.57599e+06	1.58237e+06	1.57214e+06	1.54766e+06	1.54121e+06	1.06757	1.04556	1.02677	0.993473	1.01264	1.02256	1.0267	1.02006	1.00418
C17972	366029	454370	469598	480675	415503	415376	452230	443169	453350	432113	480922	470553	438314	1.09664	0.947957	0.947667	1.03175	1.01108	1.0343	0.985852	1.09721	1.07355
C17980	2.73697e+06	3.39225e+06	2.77852e+06	7.29697e+07	2.64836e+06	2.50673e+06	6.00353e+07	4.52928e+07	5.1233e+07	6.76949e+07	6.83783e+07	6.88403e+07	2.04697e+07	3.56477	0.12938	0.12246	2.93288	2.21267	2.50287	3.30708	3.34047	3.36304
C18012	307165	291437	303908	298175	311526	288026	281833	281901	285906	288384	280882	281188	289159	1.03118	1.07735	0.996083	0.974665	0.974902	0.988751	0.997322	0.971377	0.972437
C18021	205708	160170	139206	204082	187344	232532	209922	204972	185003	195958	207383	207135	178764	1.14163	1.04799	1.30078	1.17429	1.1466	1.0349	1.09618	1.16009	1.15871
C18032	889626	717665	630390	724180	852328	803171	767675	794652	739041	711867	708524	719315	741020	0.977273	1.15021	1.08387	1.03597	1.07237	0.997329	0.960658	0.956147	0.970709
C18053	3.28246e+06	3.57079e+06	3.59318e+06	3.80306e+06	3.35919e+06	3.36762e+06	3.62451e+06	3.80572e+06	3.72703e+06	3.88121e+06	3.6555e+06	3.71916e+06	3.56163e+06	1.06779	0.943161	0.945527	1.01766	1.06853	1.04644	1.08973	1.02636	1.04423
C18069	5.38047e+06	5.69094e+06	5.72662e+06	6.06111e+06	5.88911e+06	5.76726e+06	5.77656e+06	6.06535e+06	5.93995e+06	6.18566e+06	5.82594e+06	5.9274e+06	5.7136e+06	1.06082	1.03072	1.00939	1.01102	1.06156	1.03962	1.08262	1.01966	1.03742
C18081	501093	293637	260883	397796	711885	728656	369297	375252	372063	379389	416374	397424	371963	1.06945	1.91386	1.95895	0.992832	1.00884	1.00027	1.01997	1.1194	1.06845
C18099	460847	1.7157e+06	1.43171e+06	398894	617537	570311	490105	594965	652650	564325	1.55821e+06	793339	1.15828e+06	0.344386	0.533152	0.492379	0.423133	0.513665	0.563467	0.487211	1.34528	0.684931
C18128	106993	121071	126233	355855	112729	110929	644593	141102	297932	1.33624e+06	133359	396788	154501	2.30325	0.729635	0.717981	4.17209	0.913277	1.92835	8.64875	0.863158	2.56819
C18145	1.47312e+06	1.1085e+06	1.06687e+06	1.1272e+06	1.12026e+06	1.13056e+06	1.16399e+06	1.11723e+06	1.13487e+06	1.94779e+06	1.19031e+06	1.06755e+06	1.22223e+06	0.922245	0.916571	0.924999	0.952345	0.914088	0.928525	1.59364	0.973881	0.87344
C18178	264144	300970	294104	335929	262642	277087	313329	328747	299605	342832	310706	328518	293813	1.14334	0.893908	0.943073	1.06642	1.1189	1.01971	1.16684	1.05749	1.11812
C18203	1.1737e+06	554517	465641	780605	2.19512e+06	1.29376e+06	701740	831939	663669	751465	773957	803873	742738	1.05098	2.95544	1.74188	0.944802	1.1201	0.893544	1.01175	1.04203	1.08231
C18213	464536	568318	559540	543265	482763	477816	548013	509937	546623	533630	529920	500996	528873	1.02721	0.912814	0.903459	1.03619	0.964194	1.03356	1.00899	1.00198	0.947289
C18236	3.52479e+06	2.52938e+06	2.64162e+06	2.49643e+06	3.42022e+06	3.05839e+06	4.19006e+06	3.2435e+06	2.39984e+06	2.49245e+06	2.77258e+06	2.99989e+06	2.73283e+06	0.913497	1.25153	1.11913	1.53323	1.18687	0.878152	0.912041	1.01454	1.09772
C18241	376210	400725	383259	451193	402244	411292	409539	398431	403907	421407	432607	425348	386326	1.16791	1.0412	1.06463	1.06009	1.03134	1.04551	1.09081	1.1198	1.10101
C18261	4.42608e+07	2.24798e+06	2.26703e+06	2.39236e+06	8.28984e+07	1.08161e+08	2.13315e+06	3.51646e+06	1.90868e+06	2.15159e+06	5.50442e+06	5.538e+06	1.26927e+07	0.188484	6.53119	8.5215	0.168062	0.277046	0.150376	0.169514	0.433669	0.436315
C18281	229092	269546	258031	274694	380261	222189	180809	1.08271e+06	312221	527653	171331	384721	322179	0.852611	1.18028	0.689644	0.561206	3.36057	0.969091	1.63776	0.531787	1.19412
C18282	8.5787e+08	8.87332e+08	8.69053e+08	5.03228e+08	5.14068e+08	5.52752e+08	7.26775e+08	7.51685e+08	7.48946e+08	7.98415e+08	8.12591e+08	8.00736e+08	8.7655e+08	0.574101	0.586467	0.6306	0.829132	0.85755	0.854425	0.910861	0.927034	0.913509
C18299	216103	230616	224105	227777	218116	219221	221186	224953	223994	230666	222455	227564	222893	1.02191	0.978569	0.983527	0.992341	1.00924	1.00494	1.03488	0.998035	1.02095
C18339	188980	230584	228398	238858	204942	203961	199547	203240	236518	224872	203988	192749	223377	1.0693	0.917469	0.913079	0.89332	0.909852	1.05883	1.00669	0.913198	0.862886
C18363	1.676e+06	1.68455e+06	1.68656e+06	1.72804e+06	1.88524e+06	1.99772e+06	1.73698e+06	1.72031e+06	1.63873e+06	1.79732e+06	1.77472e+06	1.82503e+06	1.69086e+06	1.02199	1.11496	1.18148	1.02728	1.01741	0.969168	1.06296	1.0496	1.07935
C18374	298291	261062	261374	269136	291546	269522	256457	247198	250131	268707	264476	267665	264263	1.01844	1.10324	1.0199	0.97046	0.935424	0.946523	1.01682	1.00081	1.01287
C18377	446552	81518.6	81949.7	282724	403673	402208	307615	361811	287040	299097	304072	398884	232661	1.21517	1.73502	1.72873	1.32216	1.5551	1.23373	1.28555	1.30693	1.71444
C18390	630588	588395	596875	669302	637073	579248	658599	744951	608313	624438	634251	655695	617206	1.08441	1.03219	0.9385	1.06706	1.20697	0.985591	1.01172	1.02762	1.06236
C18399	7.0721e+07	6.44025e+07	6.11224e+07	6.64968e+07	6.7347e+07	6.42957e+07	6.47623e+07	6.46975e+07	6.36829e+07	5.95504e+07	6.12852e+07	6.09739e+07	6.53935e+07	1.01687	1.02987	0.983213	0.990347	0.989357	0.97384	0.910647	0.937176	0.932415
C18409	947435	205245	200638	4.94187e+06	1.05741e+06	2.18693e+06	572606	738368	332575	2.23372e+06	650670	939233	470283	10.5083	2.24846	4.65024	1.21758	1.57005	0.707182	4.74974	1.38357	1.99717
C18412	901332	1.07404e+06	1.05234e+06	7.84824e+06	978574	936439	9.91723e+06	1.6027e+07	8.70321e+06	7.96825e+06	1.02494e+06	7.78908e+06	5.91927e+06	1.32588	0.16532	0.158202	1.67541	2.7076	1.47032	1.34615	0.173153	1.31588
C18416	465641	411621	436022	994420	478162	477532	597928	995623	489214	600582	611296	691484	457147	2.17528	1.04597	1.04459	1.30796	2.17791	1.07015	1.31376	1.3372	1.51261
C18435	346811	252859	255985	337653	356126	341629	336939	320290	275441	316230	330254	336524	289678	1.16561	1.22938	1.17934	1.16315	1.10567	0.95085	1.09166	1.14007	1.16172
C18445	510022	526619	494209	542555	500560	500332	522949	503663	610569	597077	600960	643608	506535	1.07111	0.988204	0.987754	1.0324	0.994331	1.20538	1.17875	1.18641	1.27061
C18457	275881	306836	303431	302143	284446	298792	288770	285456	295944	303055	283010	305241	293948	1.02788	0.967674	1.01648	0.982386	0.971112	1.00679	1.03098	0.962789	1.03842
C18461	661526	615179	575984	649011	628234	658365	619807	631564	604729	594368	623803	631718	623599	1.04075	1.00743	1.05575	0.99392	1.01277	0.96974	0.953125	1.00033	1.01302
C18463	2.02334e+06	1.30595e+08	1.47447e+08	1.20059e+08	2.10488e+06	2.04782e+06	8.06064e+07	6.13143e+07	8.11437e+07	1.62458e+08	7.98907e+07	8.70101e+07	8.8703e+07	1.3535	0.0237296	0.0230863	0.908723	0.691231	0.91478	1.83149	0.900654	0.980915
C18488	5.77567e+06	1.87639e+06	1.77423e+06	6.31271e+06	6.15655e+06	5.86572e+06	5.68352e+06	6.17171e+06	5.06879e+06	5.61368e+06	6.23603e+06	6.29199e+06	3.97432e+06	1.58837	1.54908	1.4759	1.43006	1.5529	1.27539	1.41249	1.56908	1.58316
C18495	622339	629614	634950	670053	595931	669984	593657	530502	505263	509976	562188	631168	609373	1.09958	0.977941	1.09946	0.97421	0.870571	0.829152	0.836886	0.922569	1.03577
C18499	404729	287384	306994	319015	395813	353076	346049	451140	320775	321735	340434	347536	325460	0.9802	1.21617	1.08485	1.06326	1.38616	0.985606	0.988557	1.04601	1.06783
C18511	230078	230011	228820	242546	243287	244170	230432	241202	230430	238291	229128	234871	231165	1.04924	1.05244	1.05626	0.996832	1.04342	0.996823	1.03083	0.991192	1.01603
C18514	822737	820998	854191	878356	858611	980727	821428	843132	803592	860869	855496	834308	818224	1.07349	1.04936	1.19861	1.00392	1.03044	0.982118	1.05212	1.04555	1.01966
C18542	288736	311382	311117	310078	314083	295208	312209	309318	299772	290053	305656	309467	304095	1.01968	1.03285	0.970776	1.02669	1.01718	0.985785	0.953824	1.00514	1.01767
C18544	460841	265798	261177	335191	445348	417644	348179	401160	335214	337051	323795	349462	329416	1.01753	1.35193	1.26783	1.05696	1.21779	1.0176	1.02318	0.982935	1.06085
C18547	351320	261764	257025	268158	333777	310323	294910	289702	258284	265063	304966	329968	281796	0.951605	1.18447	1.10123	1.04654	1.02806	0.916564	0.94062	1.08222	1.17095
C18557	3.42595e+06	3.4089e+06	3.54123e+06	3.81067e+06	3.89918e+06	3.44701e+06	3.64337e+06	3.95063e+06	3.60763e+06	3.71425e+06	3.67815e+06	3.79604e+06	3.48373e+06	1.09385	1.11925	0.989459	1.04582	1.13402	1.03557	1.06617	1.05581	1.08965
C18560	638946	688238	728593	706956	668362	656127	651201	636247	659186	657540	660927	665738	679229	1.04082	0.984001	0.965988	0.958735	0.936719	0.970491	0.968068	0.973054	0.980137
C18573	255107	291923	291028	285879	269678	268656	281039	289383	285234	278923	271713	283566	279564	1.02259	0.964638	0.960981	1.00528	1.03512	1.02028	0.997706	0.971914	1.01431
C18581	1.12487e+06	759471	771914	796689	1.0915e+06	976026	855639	917650	765864	795419	884816	957357	848346	0.939108	1.28662	1.1505	1.0086	1.08169	0.902773	0.937612	1.04299	1.1285
C18592	341096	222490	238715	313869	363001	345674	276560	257618	254666	281856	298622	333097	278518	1.12693	1.30333	1.24112	0.99297	0.924963	0.914361	1.01199	1.07218	1.19596
C18600	428462	378361	383965	417874	434551	433854	405379	403836	404771	418504	406462	412710	391819	1.0665	1.10906	1.10728	1.03461	1.03067	1.03306	1.06811	1.03737	1.05332
C18603	452574	480585	497025	4.35969e+06	457076	474990	1.73802e+07	518562	2.3984e+06	1.51912e+07	770493	6.64639e+06	2.35108e+06	1.85433	0.194411	0.202031	7.39244	0.220563	1.02013	6.46138	0.327719	2.82695
C18613	393767	169466	154229	256527	427927	434532	226216	238864	230669	236669	259846	279399	246619	1.04018	1.73518	1.76196	0.917269	0.968556	0.935325	0.959655	1.05364	1.13292
C18615	452412	373210	374224	403187	612894	420979	2.85266e+06	2.33312e+06	400818	395582	464236	474068	395254	1.02007	1.55063	1.06508	7.21728	5.90284	1.01408	1.00083	1.17453	1.1994
C18651	162681	159574	158700	167728	171224	164911	168794	164171	168506	156244	161882	161072	160848	1.04277	1.0645	1.02526	1.0494	1.02066	1.04761	0.971373	1.00642	1.00139
C18659	511225	494330	509874	450648	486472	521911	475684	446297	463808	461008	484802	486228	482586	0.93382	1.00805	1.08149	0.985698	0.924803	0.96109	0.955287	1.00459	1.00755
C18663	210877	232095	232677	236930	224369	218729	225622	226049	229707	221875	228999	230029	223606	1.05959	1.00341	0.978191	1.00901	1.01093	1.02729	0.99226	1.02412	1.02873
C18667	164389	172916	171880	186240	181014	185027	175710	181046	169798	176097	166195	180751	168888	1.10274	1.0718	1.09556	1.04039	1.07199	1.00539	1.04269	0.984052	1.07024
C18692	827089	809431	845978	904221	931490	821107	908181	898414	859998	875734	877921	906852	850400	1.06329	1.09535	0.965554	1.06795	1.05646	1.01129	1.02979	1.03236	1.06638
C18704	420702	282056	294428	387122	447720	426349	341104	317742	322178	347637	368316	410837	345429	1.1207	1.29613	1.23426	0.98748	0.919848	0.93269	1.00639	1.06625	1.18935
C18731	1.13971e+06	675707	678984	1.04565e+06	1.61915e+06	1.65729e+06	839947	793560	846239	982368	947021	973620	871087	1.20039	1.85876	1.90255	0.964251	0.910999	0.971475	1.12775	1.08717	1.11771
C18741	475130	289609	191761	309533	516349	524319	272958	299890	278331	285571	313538	337130	319803	0.967887	1.61459	1.63951	0.853521	0.937736	0.870321	0.892961	0.98041	1.05418
C18744	146501	135112	132559	131500	126325	132549	152878	120379	143557	129419	140715	124676	136018	0.966788	0.92874	0.974496	1.12396	0.885027	1.05543	0.951487	1.03454	0.916615
C18745	1.67877e+06	1.15332e+06	1.22712e+06	1.18899e+06	1.62897e+06	1.45663e+06	1.27697e+06	1.60601e+06	1.14299e+06	1.18709e+06	1.32051e+06	1.42877e+06	1.28357e+06	0.926315	1.26909	1.13483	0.994857	1.25121	0.890475	0.924839	1.02878	1.11312
C18749	200685	175272	168924	183129	287836	190873	587548	244313	187736	179994	217816	242328	177691	1.0306	1.61987	1.07419	3.30658	1.37493	1.05653	1.01297	1.22582	1.36377
C18750	436415	363355	369308	381161	427018	381707	405892	402136	357636	380554	412160	458030	380436	1.00191	1.12244	1.00334	1.06691	1.05704	0.940069	1.00031	1.08339	1.20396
C18760	1.74531e+07	876404	816999	1.35622e+06	1.60984e+07	2.14954e+06	2.2819e+06	5.32393e+06	1.09759e+06	1.27415e+06	1.76748e+06	2.04529e+06	5.10729e+06	0.265546	3.15205	0.420876	0.446793	1.04242	0.214906	0.249476	0.346069	0.400464
C18780	212786	235226	232452	249735	247561	240123	233712	233281	233370	232058	232272	246953	228881	1.09111	1.08161	1.04912	1.02111	1.01923	1.01961	1.01388	1.01482	1.07896
C18781	97272	98791.6	91092.2	101569	98184.2	91132.7	89434.9	88552.2	100771	103195	90956.3	92123.6	96971.6	1.04741	1.0125	0.939787	0.922279	0.913176	1.03918	1.06418	0.937969	0.950006
C18793	1.41384e+06	954575	970214	1.00135e+06	1.3719e+06	1.22676e+06	1.07545e+06	1.35257e+06	962610	999758	1.11212e+06	1.2033e+06	1.06628e+06	0.939108	1.28662	1.1505	1.0086	1.26849	0.902773	0.937612	1.04299	1.1285
C18801	972899	672174	551154	914919	1.16583e+06	2.45968e+06	707010	690614	721654	859550	742164	851896	765387	1.19537	1.52319	3.21364	0.923729	0.902306	0.942862	1.12303	0.969658	1.11303
C18818	1.54496e+07	101585	95346.2	3.6997e+06	6.77046e+06	5.69237e+06	1.20319e+06	1.22458e+07	1.00063e+06	899871	1.13835e+06	1.5832e+06	4.0576e+06	0.911797	1.66859	1.40289	0.296528	3.018	0.246607	0.221774	0.280548	0.390181
C18831	3.11363e+06	1.09526e+06	1.19401e+06	3.59254e+06	6.58612e+06	5.29378e+06	2.81723e+06	4.3043e+06	1.15416e+06	1.71241e+06	4.04811e+06	8.38411e+06	2.16054e+06	1.6628	3.04837	2.45021	1.30395	1.99223	0.534198	0.792585	1.87366	3.88056
C18846	716973	779952	784842	795550	701272	675435	770088	809333	814079	749343	783271	777790	774054	1.02777	0.905973	0.872594	0.994876	1.04558	1.05171	0.968077	1.01191	1.00483
C18852	339869	225744	209980	349336	372509	359426	269952	256118	255185	308193	279227	294777	272693	1.28106	1.36604	1.31806	0.989951	0.939219	0.935795	1.13018	1.02396	1.08098
C18853	179398	203228	195567	193294	190681	194050	184997	177742	189848	186224	193324	192401	191858	1.00749	0.993865	1.01143	0.964242	0.926428	0.989524	0.970637	1.00764	1.00283
C18857	757580	199854	197730	353300	598990	356166	344039	401293	304863	321798	350358	386247	366578	0.963779	1.634	0.971598	0.938517	1.0947	0.831645	0.877845	0.955752	1.05366
C18877	3.16347e+06	2.22614e+06	2.14498e+06	2.97642e+06	4.00679e+06	3.53548e+06	2.78263e+06	2.89416e+06	2.68344e+06	4.63423e+06	2.91442e+06	2.90348e+06	2.59529e+06	1.14686	1.54387	1.36227	1.07218	1.11516	1.03396	1.78563	1.12296	1.11875
C18889	407580	173824	172256	1.55795e+06	444281	352706	238869	505922	307563	286285	457156	416159	244658	6.36784	1.81592	1.44163	0.976338	2.06787	1.25711	1.17014	1.86855	1.70098
C18898	1.56168e+06	998991	1.00712e+06	1.26816e+06	1.55226e+06	1.45644e+06	1.19272e+06	1.33233e+06	1.14623e+06	1.07219e+06	1.08593e+06	1.16432e+06	1.17692e+06	1.07753	1.31891	1.23751	1.01343	1.13205	0.973922	0.911017	0.92269	0.989296
C18921	226466	235183	229537	236482	243480	236251	231229	239966	234986	226139	237896	219081	229646	1.02977	1.06024	1.02876	1.00689	1.04494	1.02325	0.984728	1.03592	0.953993
C18923	251608	263913	266095	269540	271221	263261	263573	263412	260552	276036	264605	260038	259835	1.03735	1.04382	1.01318	1.01438	1.01376	1.00276	1.06235	1.01836	1.00078
C18934	190919	189692	270674	196703	219722	207827	1.02268e+06	3.22511e+06	198804	195289	331938	1.56708e+06	202704	0.970393	1.08395	1.02527	5.04517	15.9105	0.980762	0.963418	1.63755	7.73089
C18935	1.21711e+07	3.74155e+06	3.82463e+06	2.38564e+06	3.94959e+06	1.77906e+06	2.63603e+06	1.29116e+06	2.49239e+06	2.54256e+06	2.35635e+06	2.51031e+06	5.45092e+06	0.437658	0.724574	0.326378	0.483594	0.23687	0.457242	0.466447	0.432285	0.460529
C19013	1.3062e+06	1.177e+06	1.24707e+06	1.17853e+06	1.27666e+06	1.18022e+06	1.18486e+06	1.11178e+06	1.12036e+06	1.17665e+06	1.20984e+06	1.23845e+06	1.18299e+06	0.996234	1.07918	0.99766	1.00158	0.939808	0.947059	0.994646	1.0227	1.04689
C19015	275290	226019	232407	253775	289836	288767	239351	218477	215304	241211	248456	259129	239265	1.06064	1.21136	1.20689	1.00036	0.91312	0.899857	1.00814	1.03841	1.08302
C19026	557237	521775	505922	491737	539074	525736	503293	443292	450331	507643	445781	519138	507310	0.969304	1.06261	1.03632	0.992082	0.87381	0.887684	1.00066	0.878717	1.02332
C19031	5.82867e+07	1.49257e+08	1.40008e+08	1.62707e+08	1.54075e+08	1.50507e+08	1.4785e+08	1.48011e+08	1.4794e+08	1.16162e+08	1.15945e+08	1.19338e+08	1.19532e+08	1.36119	1.28898	1.25913	1.2369	1.23825	1.23765	0.971807	0.969987	0.998377
C19032	657633	531533	631491	565881	673968	623233	697461	691960	612381	970993	838202	620002	605170	0.935077	1.11368	1.02985	1.1525	1.14341	1.01192	1.6045	1.38507	1.02451
C19052	476824	313950	292026	485833	550570	499865	375431	366725	363083	428614	390544	409955	380282	1.27756	1.44779	1.31446	0.987245	0.964349	0.954773	1.1271	1.02699	1.07803
C19075	474412	501746	487041	488305	534556	505375	451070	458238	376415	440280	481895	491030	461620	1.05781	1.158	1.09479	0.977146	0.992673	0.815423	0.953771	1.04392	1.06371
C19092	208234	191561	194595	213520	225145	216148	204720	204960	206987	218315	221780	208472	198646	1.07488	1.1334	1.08811	1.03058	1.03179	1.04199	1.09902	1.11646	1.04946
C19098	142366	137700	154629	381654	135245	138080	314292	389271	281733	320782	304742	329311	188410	2.02566	0.717821	0.732866	1.66813	2.06608	1.49532	1.70257	1.61744	1.74784
C19119	580178	516472	551548	582049	562456	571477	536154	554321	557983	555315	575129	548743	547568	1.06297	1.02719	1.04366	0.979154	1.01233	1.01902	1.01415	1.05033	1.00215
C19128	9.33919e+07	1.29683e+07	1.13251e+06	3.84346e+08	2.43886e+08	9.248e+07	2.29005e+07	3.8907e+07	2.34003e+07	3.06723e+07	3.77979e+07	3.05599e+07	3.57335e+07	10.7559	6.82515	2.58805	0.64087	1.08881	0.654856	0.858363	1.05777	0.855217
C19131	2.96852e+08	2.98297e+08	2.96618e+08	1.77103e+08	1.81698e+08	1.88054e+08	2.39283e+08	2.50402e+08	2.44575e+08	3.01808e+08	3.08865e+08	3.13577e+08	2.9392e+08	0.602555	0.618188	0.639815	0.81411	0.851938	0.832113	1.02684	1.05085	1.06688
C19136	3.32477e+06	3.02782e+06	2.96596e+06	3.40178e+06	3.50572e+06	3.49314e+06	3.2429e+06	3.6925e+06	2.92431e+06	3.22567e+06	3.20921e+06	3.11559e+06	3.11019e+06	1.09376	1.12717	1.12313	1.04267	1.18723	0.940236	1.03713	1.03184	1.00174
C19137	880872	571886	573440	617821	939165	764314	664776	842694	612552	605060	675767	697781	648668	0.952445	1.44784	1.17828	1.02483	1.29911	0.944323	0.932773	1.04178	1.07571
C19138	1.86729e+06	3.4509e+06	2.99603e+06	1.30859e+06	2.12619e+06	2.0583e+06	1.2379e+06	1.32357e+06	1.06635e+06	1.19554e+06	1.31094e+06	1.28123e+06	2.20491e+06	0.593487	0.964295	0.933505	0.561428	0.600281	0.483624	0.542215	0.594556	0.581078
C19147	72953	40825.9	39255.4	51666.6	62628.4	59990.7	49447.6	57742.2	51358.2	65946.8	45136.8	46233.6	49350.9	1.04692	1.26904	1.21559	1.00196	1.17003	1.04067	1.33628	0.914609	0.936834
C19158	476005	485585	494390	506815	514621	481421	467898	505974	538941	483000	513209	478728	482962	1.04939	1.06555	0.996808	0.968808	1.04765	1.11591	1.00008	1.06263	0.991232
C19173	665749	1.19603e+07	2.11503e+06	2.22095e+08	695641	635760	7.36032e+07	5.09248e+08	6.36629e+07	1.8296e+08	8.28034e+07	1.5081e+08	1.72906e+07	12.8449	0.0402323	0.0367691	4.25683	29.4523	3.68194	10.5815	4.78893	8.72208
C19174													#DIV/0!	#DIV/0!	#DIV/0!	#DIV/0!	#DIV/0!	#DIV/0!	#DIV/0!	#DIV/0!	#DIV/0!	#DIV/0!
C19181	1.50102e+08	1.43173e+08	1.28017e+08	1.488e+08	1.56324e+08	1.55363e+08	1.474e+08	1.42948e+08	1.47892e+08	1.41366e+08	1.41508e+08	1.44364e+08	1.4113e+08	1.05435	1.10766	1.10085	1.04443	1.01288	1.04792	1.00168	1.00268	1.02292
C19194	1.69863e+06	1.88769e+06	1.87121e+06	1.85451e+06	1.74485e+06	1.86361e+06	1.85958e+06	1.82278e+06	1.87101e+06	1.89882e+06	1.82446e+06	1.85224e+06	1.80852e+06	1.02543	0.964798	1.03046	1.02824	1.00789	1.03456	1.04993	1.00882	1.02418
C19205	1.4216e+09	1.48314e+09	1.45618e+09	1.38856e+09	1.38132e+09	1.37091e+09	1.45949e+09	1.44676e+09	1.44735e+09	1.41434e+09	1.44331e+09	1.43196e+09	1.45144e+09	0.956674	0.951687	0.944517	1.00555	0.996773	0.997184	0.974439	0.9944	0.986577
C19218	410490	329543	301564	439897	424510	428001	377356	416963	314118	380127	400500	402116	353839	1.24321	1.19973	1.20959	1.06646	1.1784	0.887742	1.0743	1.13187	1.13644
C19243	5.12419e+06	5.12749e+06	5.24122e+06	5.64e+06	5.771e+06	5.67318e+06	5.62659e+06	5.88313e+06	5.48355e+06	5.69349e+06	5.44388e+06	5.70097e+06	5.29679e+06	1.0648	1.08953	1.07106	1.06226	1.1107	1.03526	1.07489	1.02777	1.07631
C19247	167057	101666	92319.5	132360	164525	146857	129945	136203	111305	129283	122020	123775	121223	1.09187	1.35721	1.21146	1.07195	1.12357	0.918183	1.06649	1.00657	1.02105
C19266	7.04138e+06	181975	187739	2.85851e+06	4.97781e+06	2.27724e+07	2.68769e+06	3.70748e+06	1.95593e+06	2.97311e+06	5.97303e+06	3.82381e+06	2.48892e+06	1.14849	1.99999	9.14953	1.07986	1.4896	0.785856	1.19454	2.39985	1.53634
C19272	1.2612e+08	6.47103e+07	1.22063e+08	1.42078e+08	1.19752e+08	1.41185e+08	1.32317e+08	1.48346e+08	1.30807e+08	1.38043e+08	1.36154e+08	1.10671e+08	1.14722e+08	1.23846	1.04385	1.23067	1.15337	1.29309	1.14021	1.20328	1.18682	0.964693
C19282	459827	484540	453542	439420	440314	495029	402808	403648	390407	393970	438198	450576	453401	0.969164	0.971136	1.09181	0.888414	0.890267	0.861063	0.868921	0.966468	0.993769
C19283	347888	280601	255961	379824	397794	371621	349176	340523	327748	338522	371455	375226	310541	1.2231	1.28097	1.19669	1.12441	1.09655	1.05541	1.0901	1.19615	1.2083
C19284	6.80702e+06	2.78992e+06	1.97697e+06	436847	554736	1.08331e+06	2.08794e+06	713272	974738	1.57078e+06	1.92483e+06	2.3546e+06	3.72063e+06	0.117412	0.149097	0.291164	0.561179	0.191707	0.261982	0.422179	0.517339	0.632848
C19303	3.51802e+06	3.69093e+06	3.64685e+06	3.96075e+06	3.79185e+06	3.58486e+06	3.24603e+06	3.25049e+06	3.40686e+06	3.2964e+06	3.4183e+06	3.49448e+06	3.57333e+06	1.10842	1.06115	1.00323	0.908406	0.909654	0.953415	0.922502	0.956616	0.977935
C19310	2.59234e+06	2.8581e+06	2.79845e+06	2.76e+07	2.54239e+06	2.5241e+06	2.4601e+07	2.74149e+07	1.77561e+07	2.59696e+07	2.87977e+07	2.96437e+07	8.86164e+06	3.11455	0.286898	0.284834	2.77613	3.09366	2.0037	2.93057	3.24971	3.34517
C19326	236693	180820	176055	189338	210487	221071	194498	219846	190276	177264	190762	191818	197298	0.959652	1.06685	1.12049	0.985806	1.11428	0.964405	0.898454	0.96687	0.972221
C19333	732904	591237	530200	575154	702176	661679	618159	620640	608847	569942	574161	577602	606145	0.948871	1.15843	1.09162	1.01982	1.02391	1.00446	0.940273	0.947232	0.952909
C19350	385891	236173	220165	365474	465704	426249	282423	275873	288273	343357	296466	340300	296047	1.23451	1.57307	1.4398	0.953981	0.931857	0.97374	1.15981	1.00141	1.14948
C19380	356436	358503	377438	409891	403443	392087	398873	392953	392690	373765	409610	415005	365126	1.1226	1.10494	1.07384	1.09242	1.07621	1.07549	1.02366	1.12183	1.13661
C19391	224074	184846	185348	199693	303558	201299	208888	257836	197990	190171	218423	202645	193137	1.03395	1.57173	1.04226	1.08156	1.33499	1.02513	0.984642	1.13092	1.04923
C19392	573908	439707	427504	458483	522787	534211	447395	498147	438895	402497	446236	445595	465956	0.983963	1.12197	1.14648	0.960167	1.06909	0.941924	0.86381	0.957679	0.956302
C19400	292725	196255	204863	269360	311524	296654	237341	221086	224172	241886	256275	285861	240350	1.1207	1.29613	1.23426	0.98748	0.919848	0.93269	1.00639	1.06625	1.18935
C19409	1.01064e+06	3.13389e+06	637629	770951	1.00456e+06	3.49355e+06	1.08514e+06	1.47228e+06	1.19462e+06	727200	952407	507084	1.496e+06	0.515343	0.671501	2.33526	0.725361	0.984146	0.798546	0.486097	0.636636	0.33896
C19429	1.32338e+07	7.98775e+06	6.90376e+06	1.10021e+07	1.41836e+07	1.36491e+07	1.07057e+07	1.27488e+07	9.67567e+06	7.79539e+06	8.08218e+07	8.65147e+06	9.21051e+06	1.19451	1.53993	1.48191	1.16233	1.38415	1.0505	0.846358	8.77496	0.939304
C19434	1.18612e+06	1.22401e+06	1.24237e+06	1.27547e+06	1.3915e+06	1.47452e+06	1.28207e+06	1.26748e+06	1.16681e+06	1.32661e+06	1.30993e+06	1.34706e+06	1.23004e+06	1.03694	1.13126	1.19876	1.0423	1.03044	0.948594	1.07851	1.06495	1.09513
C19444	743449	1.01502e+06	1.05175e+06	804850	837700	7.79878e+06	717117	718102	2.12881e+06	720196	755175	769490	852859	0.943708	0.982225	9.14428	0.840839	0.841994	2.49608	0.844449	0.885463	0.902248
C19461	201167	202274	203560	207468	219100	206156	208486	207245	206241	204583	199867	203234	202413	1.02497	1.08244	1.01849	1.03	1.02387	1.01891	1.01072	0.987421	1.00405
C19482	879991	804068	798482	856179	949598	917660	810026	832726	830018	861383	813818	866440	827407	1.03477	1.14768	1.10908	0.978994	1.00643	1.00316	1.04106	0.983577	1.04718
C19485	6.659e+06	1.49728e+06	1.53014e+06	2.31061e+06	7.31209e+06	5.9933e+06	2.10745e+06	2.55453e+06	2.03784e+06	2.17678e+06	2.37726e+06	2.25955e+06	2.96495e+06	0.779308	2.46618	2.02139	0.710787	0.861576	0.687312	0.734173	0.801788	0.762088
C19488	1.02016e+06	969467	989325	2.17406e+06	1.02919e+06	1.04453e+06	2.70387e+06	3.32747e+06	2.3738e+06	2.86311e+06	2.35721e+06	2.42354e+06	1.48639e+06	1.46265	0.692409	0.702731	1.81909	2.23863	1.59703	1.92622	1.58586	1.63049
C19506	2.68745e+06	2.32933e+06	2.39416e+06	2.52316e+06	2.87164e+06	2.67231e+06	2.59037e+06	7.24901e+06	2.53013e+06	2.55041e+06	3.18852e+06	6.90439e+06	2.49557e+06	1.01105	1.15069	1.07082	1.03799	2.90475	1.01385	1.02197	1.27767	2.76666
C19508	215334	203456	191574	215247	216094	220672	211350	212293	212678	254479	207299	207295	204260	1.05379	1.05793	1.08035	1.03471	1.03932	1.04121	1.24586	1.01488	1.01485
C19518	1.56258e+06	1.03972e+06	966420	1.21575e+06	1.53764e+06	1.49651e+06	1.18232e+06	1.97592e+06	1.15748e+06	1.10112e+06	1.14141e+06	1.17367e+06	1.16879e+06	1.04017	1.31558	1.28039	1.01157	1.69057	0.990318	0.942104	0.976567	1.00417
C19524	808547	918259	1.84536e+06	927044	889623	986570	816507	817628	773013	3.31614e+06	843893	876139	1.05655e+06	0.877422	0.842004	0.933762	0.772802	0.773863	0.731636	3.13864	0.798722	0.829242
C19526	4.954e+08	317105	302837	7.12664e+06	3.04189e+08	3.81533e+08	1.41113e+08	1.72688e+08	3.23867e+06	3.19999e+06	1.20087e+08	1.55562e+08	1.26443e+08	0.0563623	2.40573	3.01742	1.11602	1.36573	0.0256136	0.0253077	0.949729	1.23029
C19530	1.04214e+06	909995	894297	909474	1.13762e+06	1.03164e+06	882329	941664	857973	879553	884492	913478	937676	0.969924	1.21323	1.10021	0.940974	1.00425	0.915	0.938014	0.943281	0.974194
C19535	1.61586e+06	1.97635e+06	1.56778e+06	2.04996e+06	2.25335e+06	2.04116e+06	2.07081e+06	2.26151e+06	2.08688e+06	1.97604e+06	1.9719e+06	2.00274e+06	1.77773e+06	1.15313	1.26755	1.14818	1.16486	1.27214	1.1739	1.11155	1.10923	1.12657
C19545	1.30788e+06	617909	518872	869842	1.48921e+06	1.44166e+06	781962	927044	739538	837370	862434	895770	827646	1.05098	1.79933	1.74188	0.944802	1.1201	0.893544	1.01175	1.04203	1.08231
C19548	522846	301434	274274	387875	492597	507943	390618	455147	379508	358399	394733	394089	372113	1.04236	1.32378	1.36503	1.04973	1.22314	1.01987	0.963145	1.06079	1.05906
C19556	1.63954e+06	1.52428e+06	1.58424e+06	3.90328e+07	1.58646e+06	1.4408e+06	3.12489e+07	3.54291e+07	2.09622e+07	3.71371e+07	3.71135e+07	3.90418e+07	1.05131e+07	3.71276	0.150903	0.137047	2.97236	3.36998	1.99391	3.53245	3.5302	3.71362
C19615	724367	708221	717909	3.42342e+06	704324	741871	3.20607e+06	6.64831e+06	2.38052e+06	3.78387e+06	3.65669e+06	5.25649e+06	1.51085e+06	2.26589	0.466178	0.491029	2.12204	4.40038	1.57562	2.50446	2.42029	3.47917
C19659	405424	673087	429495	441262	425349	296960	771000	284156	305861	350863	894052	489888	428506	1.02977	0.992632	0.693014	1.79928	0.663134	0.713784	0.818805	2.08644	1.14325
C19691	616028	657863	650077	675295	567354	604588	672331	690613	677967	678510	666930	668203	644796	1.0473	0.879897	0.937642	1.0427	1.07106	1.05144	1.05229	1.03433	1.0363
C19705	1.07096e+06	1.08363e+06	1.09292e+06	1.12168e+06	1.08687e+06	1.08542e+06	1.15244e+06	1.20331e+06	1.10467e+06	1.1295e+06	1.13624e+06	1.11918e+06	1.07622e+06	1.04224	1.00989	1.00854	1.07082	1.11809	1.02644	1.04951	1.05576	1.03992
C19783	256515	257569	255831	305467	286882	283102	248942	275659	248589	258173	269352	271266	255208	1.19693	1.12411	1.1093	0.975448	1.08014	0.974065	1.01162	1.05542	1.06292
C19786	1.65167e+06	1.37665e+06	1.4126e+06	1.52872e+06	1.70898e+06	2.18941e+06	1.47068e+06	1.54277e+06	1.44033e+06	1.51056e+06	1.47167e+06	1.57887e+06	1.4818e+06	1.03166	1.15331	1.47753	0.992496	1.04114	0.972013	1.0194	0.993161	1.06551
C19798	375250	377132	366770	368943	405299	342904	377890	439536	359043	373791	389364	362482	372856	0.989505	1.08701	0.919668	1.0135	1.17884	0.962953	1.00251	1.04427	0.972176
C19891	1.17331e+06	1.20621e+06	1.24145e+06	1.24672e+06	1.25967e+06	1.22106e+06	1.29303e+06	1.16458e+06	1.21551e+06	1.24475e+06	1.27521e+06	1.2146e+06	1.21304e+06	1.02776	1.03844	1.00661	1.06594	0.960049	1.00204	1.02614	1.05125	1.00129
C19892	4.28315e+07	1.02353e+06	975769	3.31644e+06	5.41211e+07	3.88376e+07	2.10255e+07	3.5216e+07	1.59623e+07	2.27298e+07	2.21953e+07	2.89846e+07	1.51257e+07	0.219259	3.57809	2.56766	1.39005	2.32823	1.05531	1.50273	1.46739	1.91625
C19907	166244	288230	776670	1.3993e+06	1.39637e+06	719061	209709	123773	247695	387742	291762	560704	846511	1.65303	1.64956	0.84944	0.247733	0.146216	0.292607	0.458047	0.344664	0.662371
C19910	289400	238736	239384	257911	392057	259985	269787	333005	255712	245613	282101	261723	249444	1.03395	1.57173	1.04226	1.08156	1.33499	1.02513	0.984642	1.13092	1.04923
C19915	484738	683658	676942	2.18929e+06	2.77406e+06	921558	2.5838e+06	2.60969e+06	5.06938e+06	1.05885e+06	688872	505014	880803	2.48557	3.14946	1.04627	2.93346	2.96285	5.75541	1.20215	0.782096	0.573356
C19916	274803	276888	272569	289456	282751	287926	271112	271917	280045	276455	285704	270667	272936	1.06053	1.03596	1.05492	0.993317	0.996264	1.02604	1.01289	1.04678	0.991684
C19917	434847	465418	472467	482380	450911	463450	472178	475443	455351	477022	462432	471957	458666	1.0517	0.983091	1.01043	1.02946	1.03658	0.992771	1.04002	1.00821	1.02898
C19949	472314	486938	458203	487638	526056	562198	486819	481859	482172	475513	491195	475374	467637	1.04277	1.12492	1.20221	1.04102	1.03041	1.03108	1.01684	1.05038	1.01655
C19953	215970	186126	180276	279570	217762	217462	254433	273877	235431	240235	268563	309703	204937	1.36418	1.06258	1.06112	1.24152	1.3364	1.1488	1.17224	1.31047	1.51121
C19954	5.99131e+06	5.18798e+06	5.35113e+06	5.36869e+06	5.76567e+06	5.51363e+06	5.47322e+06	5.19215e+06	5.38352e+06	5.42667e+06	5.33724e+06	5.7943e+06	5.479e+06	0.979866	1.05232	1.00632	0.998945	0.947645	0.982574	0.990449	0.974128	1.05755
C19990	233986	250030	257758	254469	238761	240318	241721	237037	237955	235605	241921	233644	246554	1.0321	0.968392	0.974706	0.980395	0.961399	0.965122	0.955589	0.981208	0.947638
C19998	827656	741949	676469	775499	872700	754466	807275	919196	681881	772341	773720	758966	738843	1.04961	1.18117	1.02115	1.09262	1.2441	0.922904	1.04534	1.04721	1.02724
C20021	198570	217340	214375	219295	210155	214296	220630	215307	223347	218145	209675	217673	210960	1.03951	0.996182	1.01582	1.04584	1.02061	1.05872	1.03406	0.993911	1.03182
C20045	639634	604077	620297	920528	638605	654911	934709	1.8604e+06	842315	923661	945666	1.09773e+06	712771	1.29148	0.895947	0.918823	1.31137	2.61009	1.18175	1.29587	1.32675	1.54009
C20125	113312	108773	107635	193864	115118	128327	112061	109449	113143	109060	107634	108706	109319	1.77338	1.05305	1.17388	1.02509	1.00119	1.03498	0.997635	0.984591	0.994396
C20144	1.60505e+06	1.45162e+06	1.46682e+06	1.44587e+06	1.59066e+06	1.42431e+06	1.39136e+06	1.39901e+06	1.37257e+06	1.38253e+06	1.43448e+06	1.45653e+06	1.48284e+06	0.975066	1.07271	0.960528	0.938308	0.943466	0.925637	0.932351	0.967386	0.982256
C20231	1.93599e+06	1.25832e+06	1.20052e+06	1.79135e+06	1.94988e+06	1.81744e+06	1.59763e+06	1.79119e+06	1.51472e+06	1.65289e+06	1.70169e+06	1.72506e+06	1.50056e+06	1.19378	1.29943	1.21117	1.06469	1.19368	1.00943	1.10151	1.13403	1.14961
C20239	1.5381e+06	1.26822e+06	1.28571e+06	1.29472e+06	1.55871e+06	1.4194e+06	1.27195e+06	1.27574e+06	1.29058e+06	1.24601e+06	1.24109e+06	1.27619e+06	1.33273e+06	0.971476	1.16956	1.06503	0.954388	0.957238	0.96837	0.934929	0.931236	0.957572
C20268	405247	332717	316864	373575	426659	425086	352342	333972	316943	355081	379085	374626	348006	1.07347	1.22601	1.22149	1.01246	0.959674	0.910742	1.02033	1.08931	1.07649
C20286	541660	540515	540030	578278	565278	557879	540798	555087	523449	549800	563228	549278	528231	1.09474	1.07013	1.05613	1.02379	1.05084	0.990947	1.04083	1.06625	1.03984
C20314	150231	125097	121115	130995	164899	141879	131757	145567	125996	102078	118648	128706	127632	1.02635	1.29199	1.11163	1.03232	1.14053	0.987185	0.799783	0.92961	1.00842
C20316	2.80297e+08	2.55918e+08	6.10831e+08	2.7982e+08	3.49757e+08	2.82751e+08	2.84396e+08	2.79002e+08	2.81998e+08	3.36872e+08	3.24882e+08	3.42643e+08	3.20537e+08	0.872972	1.09116	0.882117	0.887248	0.870421	0.879768	1.05096	1.01355	1.06897
C20340	524246	322121	308033	411763	512185	480287	398273	455671	368824	356459	380766	375734	381154	1.08031	1.34377	1.26009	1.04491	1.1955	0.967652	0.935211	0.998983	0.985781
C20351	452320	546832	531490	556100	510683	530111	542564	525430	526707	533678	522430	521588	511934	1.08627	0.997556	1.0355	1.05983	1.02636	1.02886	1.04247	1.0205	1.01886
C20380	334084	235362	242374	375102	313387	306845	317713	383791	285572	352658	373738	393008	285761	1.31264	1.09667	1.07378	1.11181	1.34305	0.999338	1.2341	1.30787	1.3753
C20396	202544	201276	205026	218056	215912	208540	207329	206055	211243	206779	206931	206777	201337	1.08304	1.07239	1.03577	1.02976	1.02343	1.0492	1.02703	1.02778	1.02702
C20417	714573	2.10533e+06	1.10046e+06	787921	1.96529e+06	539174	449486	472623	1.79887e+06	1.00935e+06	431546	910031	1.16704e+06	0.675148	1.684	0.462003	0.385152	0.404978	1.5414	0.864884	0.36978	0.77978
C20424	1.52142e+06	1.36829e+06	1.35626e+06	1.32774e+06	1.66081e+06	1.50609e+06	1.28811e+06	1.35769e+06	1.24756e+06	1.31641e+06	1.29127e+06	1.33359e+06	1.39388e+06	0.952548	1.1915	1.0805	0.924117	0.974036	0.895021	0.944419	0.926382	0.956742
C20441	581685	467656	528118	513311	562726	548802	508488	462741	470088	529915	481843	512334	510314	1.00587	1.1027	1.07542	0.99642	0.906777	0.921174	1.03841	0.944208	1.00396
C20452	1.25036e+07	660402	675689	2.27642e+07	1.12803e+07	9.20356e+06	2.26955e+07	4.91624e+07	1.53666e+07	4.49774e+07	4.41232e+07	4.12324e+07	9.51663e+06	2.39205	1.18532	0.967103	2.38482	5.16594	1.61471	4.72618	4.63643	4.33266
C20515	376607	231550	218231	277250	374334	351229	278309	321298	253026	247049	261878	280782	271990	1.01934	1.37628	1.29133	1.02323	1.18128	0.930274	0.908299	0.96282	1.03232
C20517	2.09043e+09	4.97596e+06	1.67087e+06	1.09533e+09	1.87679e+09	1.62996e+09	4.1803e+08	1.50626e+09	4.71891e+08	1.15376e+09	4.83635e+08	1.32554e+09	6.73098e+08	1.62729	2.78828	2.42158	0.621053	2.2378	0.701072	1.7141	0.718521	1.96931
C20543	3.30931e+06	4.10162e+06	3.35955e+06	5.39675e+08	3.20218e+06	3.03092e+06	4.46427e+08	4.74704e+08	3.62233e+08	4.96235e+08	5.10022e+08	4.21994e+08	1.34131e+08	4.02349	0.0238735	0.0225967	3.32829	3.5391	2.70059	3.69963	3.80241	3.14613
C20545	289795	275168	281235	316821	291891	264665	286435	308659	301326	306840	293696	317743	284430	1.11388	1.02623	0.93051	1.00705	1.08519	1.05941	1.07879	1.03258	1.11712
C20546	1.73079e+07	2.73862e+07	2.25754e+07	2.45719e+07	1.34419e+07	1.90001e+07	2.04618e+07	2.36997e+07	2.19714e+07	1.62368e+07	1.61495e+07	1.93788e+07	2.09669e+07	1.17194	0.6411	0.906198	0.97591	1.13034	1.04791	0.774405	0.770238	0.92426
C20552	725545	762660	756461	777545	744408	737332	765262	794397	762279	729920	740839	774193	750651	1.03583	0.991684	0.982257	1.01946	1.05828	1.01549	0.972384	0.986929	1.03136
C20554	576887	482996	513931	541621	616425	573638	556049	487550	524695	508561	521736	589003	518584	1.04442	1.18867	1.10616	1.07225	0.940156	1.01178	0.980673	1.00608	1.13579
C20651	2.55659e+10	3.50891e+10	3.57741e+10	2.37957e+10	2.64396e+10	2.67985e+10	2.31561e+10	2.13646e+10	2.53031e+10	2.327e+10	2.31289e+10	2.18911e+10	2.95409e+10	0.805519	0.895018	0.907166	0.783865	0.723222	0.856546	0.787721	0.782946	0.741043
C20669	564391	374875	376693	580114	618594	596868	448287	425314	423764	511791	471226	525627	459909	1.26137	1.34503	1.29779	0.97473	0.924779	0.921407	1.11281	1.02461	1.14289
C20692	2.06648e+06	634304	597527	2.18282e+06	2.55214e+06	2.14553e+06	2.3124e+06	2.29486e+06	2.14817e+06	2.2531e+06	2.40585e+06	2.13074e+06	1.48774e+06	1.46721	1.71545	1.44215	1.55431	1.54252	1.44392	1.51445	1.61712	1.4322
C20701	543418	534387	520943	1.36518e+06	551616	526245	1.29745e+06	1.20051e+06	1.20468e+06	1.29741e+06	1.31915e+06	1.36833e+06	733810	1.8604	0.751716	0.717141	1.7681	1.636	1.64168	1.76804	1.79767	1.86469
C21201	288682	164774	155337	204450	248493	277659	213525	245434	203230	192111	201740	209750	201320	1.01555	1.23432	1.37919	1.06063	1.21912	1.00949	0.95426	1.00209	1.04187
C21217	661124	403749	392789	1.81816e+08	922745	656418	9.02314e+07	1.42327e+08	5.48213e+07	5.45354e+07	1.32462e+08	7.73311e+07	1.87758e+07	9.68352	0.0491454	0.0349609	4.80573	7.58032	2.91979	2.90456	7.05495	4.11866
C21247	799283	612381	608781	2.59606e+06	5.85926e+06	9.67702e+07	623089	688299	611251	604428	743863	629536	662808	3.91677	8.84005	146	0.940074	1.03846	0.922214	0.91192	1.12229	0.949802
C21283	690473	701260	688112	801596	696949	646894	643855	628577	726866	732516	689370	672464	696781	1.15043	1.00024	0.928404	0.924043	0.902115	1.04318	1.05129	0.989364	0.965101
C21289	530880	437941	439131	473117	719197	493995	574690	610870	469082	455746	544242	556292	458870	1.03105	1.56732	1.07655	1.2524	1.33125	1.02225	0.993192	1.18605	1.21231
C21304	1.30816e+06	1.44414e+06	1.2899e+06	1.33443e+06	1.35069e+06	1.28321e+06	1.6068e+06	2.48383e+06	3.25727e+06	1.69441e+06	1.82804e+06	1.40474e+06	1.52184e+06	0.876854	0.887539	0.843197	1.05583	1.63213	2.14035	1.11339	1.2012	0.923054
C21542	5.91388e+07	1.97818e+06	2.02313e+06	1.92549e+06	7.2604e+07	3.74532e+07	1.94029e+06	2.37494e+06	1.79658e+06	2.0644e+06	2.09117e+06	1.91533e+06	1.62585e+07	0.11843	4.46562	2.30362	0.11934	0.146074	0.110501	0.126974	0.12862	0.117805
C21551	779310	844246	835042	876047	857689	848410	821769	797080	848681	824794	828165	875436	829714	1.05584	1.03372	1.02253	0.990424	0.960669	1.02286	0.99407	0.998134	1.05511
C21557	325687	345469	344580	351097	336839	344880	344788	342137	349165	341942	345143	337239	339256	1.0349	0.992876	1.01658	1.01631	1.00849	1.02921	1.00792	1.01735	0.994056
C21793	1.4896e+08	5.04022e+06	7.5022e+06	1.31426e+08	1.31166e+08	1.19183e+08	1.3625e+08	1.19863e+07	1.17296e+08	1.40311e+08	1.47834e+08	1.58935e+08	8.04034e+07	1.63458	1.63135	1.48232	1.69458	0.149078	1.45884	1.74508	1.83865	1.97672
C22163	1.47725e+06	1.85827e+06	4.86704e+06	735698	7.61949e+06	1.10548e+06	735898	7.00446e+06	1.45838e+06	1.60479e+06	791791	2.05638e+06	2.03766e+06	0.36105	3.73933	0.542524	0.361148	3.43749	0.715713	0.787562	0.388578	1.00919
C22165	730463	703857	724411	1.91057e+06	763260	711014	1.81626e+06	9.99277e+06	2.94386e+06	1.65501e+06	2.68185e+06	3.75126e+06	872222	2.19047	0.875076	0.815175	2.08234	11.4567	3.37513	1.89746	3.07474	4.30081
C22170	33937.4	25760.8	26199.5	34558.1	33898	33417.2	31874	31942.1	24744.7	30076.6	29835.2	34442.5	28289.5	1.22159	1.19826	1.18126	1.12671	1.12912	0.874695	1.06317	1.05464	1.2175
C22189	343252	441166	415952	414627	365271	397362	418251	390762	409050	394331	381860	417752	402463	1.03022	0.90759	0.987325	1.03923	0.970926	1.01637	0.979794	0.948807	1.03799
HMDB0000349	66391.1	50228.8	51740.2	60813.7	67904.7	64618.1	58031.3	60439	55855.7	57340.4	62455	62860.8	56530.1	1.07577	1.20121	1.14307	1.02656	1.06915	0.98807	1.01433	1.10481	1.11199
HMDB0000439	8.3059e+07	1.94082e+08	1.63038e+08	9.51051e+07	2.15402e+08	2.3224e+08	9.19797e+07	2.03358e+08	1.95961e+08	2.32872e+08	2.33808e+08	1.01216e+08	1.27544e+08	0.745662	1.68884	1.82085	0.721158	1.59441	1.53641	1.82581	1.83315	0.793577
HMDB0000706	3.12307e+06	3.11141e+06	3.12403e+06	3.47812e+06	3.21267e+06	3.1462e+06	3.15127e+06	3.42687e+06	3.2928e+06	3.39012e+06	3.17821e+06	3.2824e+06	3.16561e+06	1.09872	1.01487	0.99387	0.995472	1.08253	1.04018	1.07092	1.00398	1.03689
HMDB0001417	918253	924181	885899	943853	917136	969073	929043	915040	991343	859316	913753	865327	901915	1.0465	1.01688	1.07446	1.03008	1.01455	1.09915	0.952768	1.01312	0.959433
HMDB0001538	325599	309446	276209	329814	314987	307193	292210	261124	233260	296621	297420	283555	297966	1.10688	1.05712	1.03097	0.980682	0.876355	0.782842	0.995486	0.998169	0.951635
HMDB0002091	875336	967112	991312	981809	937738	950519	934849	938226	984023	965828	930898	951704	934088	1.05109	1.00391	1.01759	1.00081	1.00443	1.05346	1.03398	0.996585	1.01886
HMDB0010347	216060	217250	219051	222828	235321	221419	229204	222589	221510	219729	214664	218280	217469	1.02464	1.08209	1.01816	1.05396	1.02354	1.01858	1.01039	0.987103	1.00373
HMDB0013078	6.86857e+06	2.20924e+06	2.184e+06	5.53792e+06	6.50397e+06	6.86882e+06	5.95056e+06	6.09781e+06	5.82565e+06	5.70654e+06	6.16425e+06	5.61226e+06	4.57623e+06	1.21015	1.42125	1.50098	1.30032	1.33249	1.27302	1.24699	1.34701	1.22639
HMDB0013158	2.70009e+06	2.37176e+06	2.3509e+06	2.30147e+06	2.87879e+06	2.6106e+06	2.23277e+06	2.58692e+06	2.26517e+06	2.28182e+06	2.24364e+06	2.3116e+06	2.43184e+06	0.946387	1.18379	1.07351	0.91814	1.06377	0.931461	0.93831	0.922607	0.950554
HMDB0013659	9.15739e+07	2.23284e+08	1.64743e+08	1.8731e+08	1.21233e+08	1.32679e+08	1.50206e+08	1.39184e+08	1.79836e+08	9.73333e+07	1.11693e+08	1.17271e+08	1.48806e+08	1.25875	0.8147	0.891622	1.0094	0.935334	1.20852	0.654094	0.750592	0.788075
HMDB0028699	117433	119735	116702	119166	126314	127302	127212	116801	122748	116414	115927	119259	118489	1.00572	1.06604	1.07437	1.07361	0.985754	1.03594	0.982482	0.978379	1.0065
HMDB0031511	371091	388777	386800	389068	366062	397274	366730	391746	399204	378809	420836	376614	377617	1.03032	0.969399	1.05206	0.971169	1.03741	1.05717	1.00315	1.11445	0.997343
HMDB0032024	1.65829e+06	1.3998e+06	1.46888e+06	3.43587e+06	1.58746e+06	1.53083e+06	1.85529e+06	9.85559e+06	1.64587e+06	3.60735e+06	5.57519e+06	3.23589e+06	1.71963e+06	1.99803	0.923143	0.890209	1.07889	5.73123	0.957107	2.09775	3.24209	1.88174
HMDB0033115	496198	501885	494501	576055	500852	465745	462697	443116	522351	507682	478839	483256	499186	1.15399	1.00334	0.933008	0.926903	0.887677	1.04641	1.01702	0.959239	0.968089
HMDB0034315	304987	251594	252278	271803	413174	273988	284319	350941	269485	258842	297296	275820	262879	1.03395	1.57173	1.04226	1.08156	1.33499	1.02513	0.984642	1.13092	1.04923
HMDB0040991	1.34403e+06	1.11801e+06	1.14413e+06	1.23842e+06	1.37624e+06	1.37315e+06	1.21567e+06	1.26761e+06	1.19845e+06	1.29189e+06	1.21475e+06	1.30092e+06	1.1933e+06	1.03781	1.15331	1.15072	1.01875	1.06228	1.00432	1.08262	1.01798	1.09019
HMDB0250338	214033	204990	207735	223907	223366	220442	213693	216200	203972	213900	222556	208342	204677	1.09395	1.09131	1.07702	1.04405	1.0563	0.996552	1.04506	1.08735	1.0179
HMDB0253028	583999	384516	358453	595034	701587	620471	459817	449153	461260	559024	482680	554046	472437	1.2595	1.48504	1.31334	0.973288	0.950716	0.976342	1.18328	1.02168	1.17274
HMDB0253945	603890	693170	679673	735687	624781	646905	649010	748917	674622	727736	688689	674703	672914	1.09328	0.928471	0.961348	0.964476	1.11295	1.00254	1.08147	1.02344	1.00266
HMDB0254339	888609	613000	5.00718e+06	1.34671e+06	702746	839643	734961	3.77759e+06	1.04613e+06	270188	558474	569414	1.39059e+06	0.968444	0.505357	0.603802	0.528523	2.71653	0.75229	0.194297	0.401609	0.409476
HMDB0254500	1.4012e+06	1.28114e+06	1.31034e+06	1.4237e+06	1.36606e+06	1.34478e+06	1.34437e+06	1.34804e+06	1.30092e+06	1.35667e+06	1.34482e+06	1.32561e+06	1.32353e+06	1.07568	1.03213	1.01606	1.01575	1.01852	0.982914	1.02504	1.01609	1.00157
HMDB0254869	1.59536e+06	391980	389166	1.05885e+06	1.19792e+06	1.20535e+06	1.05161e+06	1.12202e+06	956179	1.0254e+06	1.10306e+06	1.05848e+06	887659	1.19286	1.34952	1.35789	1.1847	1.26403	1.07719	1.15518	1.24266	1.19244
HMDB0303857	1.06683e+06	1.05735e+06	1.11935e+06	1.07856e+06	1.07297e+06	1.0894e+06	1.05727e+06	1.01035e+06	1.03178e+06	1.04855e+06	1.10074e+06	1.06431e+06	1.06167e+06	1.01591	1.01064	1.02612	0.995861	0.95166	0.971844	0.987647	1.0368	1.00249
HMDB0304500	3.39778e+07	2.20539e+07	2.89805e+07	2.57992e+07	9.70702e+06	3.27888e+07	4.10789e+07	1.83119e+07	4.5416e+07	4.64215e+07	4.06895e+07	4.45116e+07	3.01239e+07	0.856435	0.322237	1.08846	1.36366	0.607888	1.50764	1.54102	1.35074	1.47762

## Sheet: nomalize data-graph was made 
Sample	CD4+4	CD4+4	CD4+5	CD4+ I2	CD4+ I4	CD4+ I5	CD4+ I+D1	CD4+ I+D2	CD4+ I+D3	CD4+ U+D2	CD4+ U+D3	CD4+ U+D4
Label	UNINFECTED	UNINFECTED	UNINFECTED	INFECTED	INFECTED	INFECTED	INFECTED+D	INFECTED+D	INFECTED+D	UNINFECTED+D	UNINFECTED+D	UNINFECTED+D
C00135	1	1	1	1.20036	1.61487	2.19031	1.24417	1.3225	1.01825	1.17825	1.20434	1.40453
C00328	1	1	1	0.952591	1.11098	1.09914	1.00303	0.883449	0.897476	1.01442	1.0346	0.958496
C00490	1	1	1	1.86383	1.08237	1.26353	1.00036	0.948205	0.899857	1.07629	1.08302	1.05028
C00878	1	1	1	1.24981	1.05452	1.23101	1.01559	0.92422	0.938894	0.962372	1.02327	0.956473
C01489	1	1	1	1.51924	1.21376	1.22351	1.02418	1.08976	0.915872	0.953206	1.03328	1.02269
C01591	1	1	1	0.011526	0.0632512	0.0699094	3.34105	2.39321	2.56946	2.32442	2.65776	2.35112
C01595	1	1	1	3.35464	2.99777	2.50123	0.870229	1.17331	0.768239	0.929806	1.01261	1.18035
C01904	1	1	1	15.6692	1.25655	1.23489	1.05309	1.20486	0.982951	0.968865	0.993496	1.02879
C02837	1	1	1	54.2595	0.841665	0.843179	0.818844	0.779117	1.14198	0.847168	0.927244	0.820476
C06940	1	1	1	0.31817	0.953974	0.977623	1.22863	0.982246	1.17744	1.23418	1.49024	0.920134
C06953	1	1	1	0.307907	1.02834	0.987969	0.98165	0.983624	1.00604	0.987433	1.01369	0.975366
C07063	1	1	1	4.82073	46.1893	54.5457	1.11127	1.22035	0.993586	1.12238	1.08964	1.09924
C08475	1	1	1	0.430527	0.909184	0.947454	1.0424	1.1224	1.02062	1.04467	1.0346	1.10046
C08691	1	1	1	0.354807	1.01456	0.976796	1.16766	1.26613	1.10331	1.09488	1.07925	1.07457
C09098	1	1	1	0.0393793	0.985365	0.977646	0.995752	0.999675	0.993188	0.987091	0.993609	0.994071
C09100	1	1	1	0.145795	0.980361	0.981094	1.01392	1.01462	1.01175	0.979035	1.0369	0.98125
C09419	1	1	1	0.775363	1.00859	1.09512	1.09416	1.13261	1.04048	0.953743	1.02524	1.09259
C09633	1	1	1	0.306814	1.04947	1.05796	0.997318	1.00379	0.995317	1.03184	1.07347	0.897031
C09674	1	1	1	0.2163	0.888638	5.66799	2.2092	5.85317	0.535938	0.516392	0.768173	1.45154
C09697	1	1	1	0.836924	0.382868	2.01558	0.770044	2.16709	0.463194	1.38377	0.68686	0.736022
C10149	1	1	1	4.86557	1.10662	1.09308	0.940503	0.941795	0.869699	0.990416	1.02926	1.01964
C10341	1	1	1	0.284101	0.939857	1.04525	0.989993	0.968228	1.01576	1.00566	1.07064	1.01525
C10460	1	1	1	7.87644	0.944854	1.0014	1.10144	1.17037	1.05583	1.14137	1.09808	1.12702
C10462	1	1	1	8.50554	1.63405	1.55713	0.429713	0.792825	0.974512	1.17038	1.17108	0.492822
C10550	1	1	1	0.217384	1.03469	0.999975	1.01948	0.982759	1.00229	1.0409	1.00521	1.01921
C10576	1	1	1	0.160362	1.22527	1.30324	1.18815	1.18952	0.904088	1.20621	1.11391	1.17564
C10636	1	1	1	0.685001	0.990384	1.05535	0.908036	0.909284	1.0221	0.969374	0.977536	0.984444
C10851	1	1	1	7.30889	1.24726	2.65761	0.956575	1.0993	0.939366	0.906859	0.968964	1.0616
C10927	1	1	1	0.283119	1.10378	1.06456	1.11237	0.875095	1.03017	0.955515	1.02039	0.875759
C11721	1	1	1	3.07615	0.925076	0.948009	1.19141	1.0012	1.14178	1.19679	1.4451	0.970132
C12032	1	1	1	0.203195	0.654427	0.582292	2.40086	2.71346	1.66672	2.54876	2.87113	2.73872
C12391	1	1	1	0.145058	1.00821	0.973571	0.941369	0.977643	0.982579	0.998956	0.961956	0.96152
C14291	1	1	1	2.69832	1.51372	1.16668	0.966566	2.79824	0.974772	1.05335	1.05698	2.79766
C14322	1	1	1	0.00254174	0.889555	0.905963	0.86994	0.887422	0.91803	0.914227	0.91632	1.22423
C14743	1	1	1	1.62443	1.05013	1.11316	1.00069	1.03211	1.0622	1.0706	1.01566	1.02644
C14859	1	1	1	0.639937	1.24717	1.05416	1.05249	1.00423	1.29866	1.23017	1.23861	1.13191
C15678	1	1	1	0.231896	0.99773	1.02887	1.03633	1.12057	0.959052	1.03226	1.01342	1.09368
C15819	1	1	1	2.1896	1.27416	1.34567	0.99298	0.924972	0.91437	1.07219	1.16913	1.13426
C16624	1	1	1	0.325789	1.05139	0.99939	0.991833	0.930559	0.967072	1.01085	1.01382	0.983844
C16625	1	1	1	0.321613	1.11723	1.03028	1.02472	0.934862	0.95427	1.02643	1.00603	1.00218
C16891	1	1	1	0.782534	1.05926	1.12405	1.03824	1.14163	1.00362	1.00034	1.02091	1.07519
C17005	1	1	1	0.832014	3.21004	3.14816	0.357311	0.533744	0.346826	0.362871	0.376137	0.540705
C17156	1	1	1	0.0518379	3.55104	0.613564	0.943394	0.363965	0.232334	0.630537	1.37596	0.856495
C17968	1	1	1	1.12141	1.00575	0.993692	1.00224	1.10246	0.990305	1.00826	0.982123	1.04574
C17992	1	1	1	0.0858456	0.258229	0.257515	4.984	0.899859	4.15026	1.44638	1.01237	1.25037
C18466	1	1	1	0.450552	0.924599	0.912492	0.976364	0.915189	1.01366	1.00142	1.00631	1.03186
C18470	1	1	1	7.43706	1.06975	1.04714	1.05065	1.01497	1.01959	0.997988	1.03105	0.98441
C18504	1	1	1	0.260622	0.523012	0.342255	0.486229	0.388291	0.0872403	0.447475	0.364599	0.319566
C19114	1	1	1	0.072406	0.586838	0.533912	0.602884	0.592121	0.587087	0.566854	0.527444	0.624645
C19994	1	1	1	0.995919	0.700695	0.570648	0.809993	2.62917	0.770132	0.838437	0.889245	0.882331
C00003	1	1	1	0.0337939	0.0831005	0.0848005	3.3254	4.09061	3.04744	3.85948	4.32616	4.11259
C00004	1	1	1	2.4664	0.779174	0.928462	2.70819	0.492977	2.30696	2.8834	3.1273	3.0818
C00005	1	1	1	0.95328	1.11311	1.0803	0.957798	1.04822	0.942475	0.999035	1.00881	1.01097
C00008	1	1	1	0.0985066	0.187899	0.1794	11.8018	181.531	2.66427	14.3902	15.8311	174.327
C00009	1	1	1	26.5288	1.47989	1.63985	0.910786	0.83448	0.859804	0.962201	0.989227	0.955492
C00019	1	1	1	0.164969	0.966903	0.950806	1.00521	0.994193	0.994297	1.001	1.05434	1.02329
C00021	1	1	1	0.937329	1.09318	1.08153	0.986955	0.876355	0.782842	0.998169	1.01803	0.807731
C00022	1	1	1	108.679	1.75337	1.47333	0.400826	0.39153	0.545668	0.534004	0.52445	0.841812
C00025	1	1	1	0.992934	1.17325	1.07959	0.961698	1.07733	0.954122	1.03229	1.01958	1.0877
C00026	1	1	1	0.0198125	1.31962	0.94732	1.1946	2.0512	0.912481	1.1171	1.55876	0.963813
C00031	1	1	1	2.59537	1.37161	1.37492	0.989951	0.939219	0.935795	1.02396	1.08098	1.05708
C00036	1	1	1	0.416221	1.13191	1.04491	1.00256	0.939808	0.947059	1.06286	1.04689	0.979548
C00037	1	1	1	6.9232	1.59511	1.7613	0.840139	1.03342	0.846433	0.961394	0.998555	1.24259
C00042	1	1	1	0.725337	1.09775	1.15963	0.964278	1.01577	0.801646	1.00284	1.08846	1.09973
C00049	1	1	1	4.79709	1.0675	1.06217	1.00721	1.01904	1.02905	1.04123	0.988974	0.988423
C00059	1	1	1	0.0769248	5.42363	0.154583	0.24553	0.244041	0.584064	0.254439	0.148577	0.226029
C00061	1	1	1	0.319156	1.10811	1.04844	0.98669	0.999962	0.979872	0.962654	0.973659	1.01675
C00062	1	1	1	0.683041	1.06271	5.92241	0.928428	0.920307	0.900756	1.00703	1.02041	1.04112
C00064	1	1	1	1.2083	1.62555	5.239	1.2524	1.33125	1.02225	1.18605	1.21231	1.41382
C00065	1	1	1	0.952591	1.11098	1.09914	1.00303	0.883449	0.897476	1.01442	1.0346	0.958496
C00074	1	1	1	0.260684	5.0121	1.23789	7.68708	2.04126	0.554494	7.10576	8.18943	1.79159
C00075	1	1	1	0.260346	0.678673	0.617099	1.72349	0.694028	1.68299	0.802771	0.912559	0.848606
C00078	1	1	1	0.406146	1.06802	1.04358	1.11759	0.998183	0.973134	1.02126	1.01828	1.04549
C00079	1	1	1	0.300021	1.22707	1.18482	1.07867	1.09703	1.05979	1.09332	1.06033	1.09552
C00080	1	1	1	5.80362	0.808689	0.760037	1.60952	1.87457	1.44328	1.74892	1.81304	1.63077
C00082	1	1	1	0.431494	0.911226	0.949581	1.04474	1.12492	1.02292	1.04702	1.03693	1.10293
C00086	1	1	1	0.18941	1.04419	1.06296	0.952369	0.954258	1.0174	0.987348	1.00369	1.02386
C00093	1	1	1	2.82097	1.09558	1.08649	1.10411	1.01315	1.08511	1.12018	1.13219	0.974497
C00099	1	1	1	33.0935	1.21221	1.15571	0.444827	1.15422	0.454016	0.819478	0.394371	0.363962
C00106	1	1	1	1.98456	1.02297	1.09006	0.937908	0.939197	0.867488	0.969366	1.00969	1.01683
C00108	1	1	1	25.7651	0.986803	1.01268	1.13571	1.23149	1.07312	1.13826	1.04972	1.09971
C00110	1	1	1	0.248311	3.07206	4.57614	0.810259	0.802164	0.634928	0.639981	0.871967	0.805367
C00111	1	1	1	5.8875	0.971734	0.990337	1.04544	1.0296	1.04674	1.00062	0.985785	0.959285
C00114	1	1	1	0.287246	1.77752	12.206	0.930818	1.66638	6.82797	5.09976	4.56387	2.83983
C00118	1	1	1	0.182151	0.337743	0.359896	0.287491	2.45976	0.543299	2.4337	2.93444	2.48735
C00122	1	1	1	13.8309	0.479618	1.11241	2.04092	3.90261	1.46107	1.73172	2.88603	1.01366
C00123	1	1	1	0.992461	1.26358	1.2415	1.07407	1.18063	1.00514	0.994364	1.05091	1.07725
C00125	1	1	1	0.504737	2.17413	2.02838	1.47803	1.65966	1.63098	1.62904	0.989596	0.862642
C00144	1	1	1	0.416246	1.04566	1.06896	1.00759	1.07974	1.00825	1.03419	1.04889	1.10057
C00147	1	1	1	0.946402	1.10376	1.092	0.996509	0.877709	0.891645	0.882638	1.02788	0.952269
C00148	1	1	1	15.9902	0.82256	1.92952	1.69485	1.18005	1.61934	1.25339	1.84251	1.50852
C00149	1	1	1	0.288811	1.19409	1.17783	0.993373	1.01408	0.994888	1.05609	1.03854	1.01955
C00153	1	1	1	0.606497	0.90675	0.922491	0.885447	0.864568	0.78034	0.901044	0.902205	0.902639
C00158	1	1	1	0.425443	1.064	1.07408	1.11338	1.11719	0.994102	1.05068	1.07585	1.07686
C00166	1	1	1	0.46387	1.30864	1.23198	1.12161	1.14069	1.03729	1.11538	1.12946	1.13912
C00170	1	1	1	1.53538	21.4627	4.49382	0.943774	0.140201	1.27752	0.580182	0.583562	1.00727
C00183	1	1	1	0.269109	0.122316	1.09655	1.27223	0.129722	1.30245	1.32537	1.35136	1.26175
C00188	1	1	1	4.12567	1.00041	1.04794	1.04259	1.03591	1.03	1.01455	0.977796	0.965495
C00197	1	1	1	11.8488	1.05612	2.0872	1.05298	1.55937	0.799972	1.2742	1.35208	1.70589
C00207	1	1	1	0.147752	1.06762	1.18232	1.13605	1.0493	0.956606	1.04567	1.03258	1.01696
C00214	1	1	1	0.188213	1.06021	1.01343	1.02517	0.959872	0.990036	0.913281	0.947867	1.04177
C00219	1	1	1	4.99778	1.61752	1.62594	0.858496	1.15749	0.795157	0.932689	0.998956	1.16444
C00227	1	1	1	0.780024	1.02734	1.08524	0.935741	0.912534	0.869717	0.999687	1.00376	0.969937
C00236	1	1	1	1.23378	1.65984	1.11658	1.27881	1.35838	1.04381	1.21106	1.23787	1.44363
C00249	1	1	1	3.19201	0.617497	0.83176	0.68166	1.29274	0.773358	1.5789	1.62554	0.752446
C00251	1	1	1	1.71764	1.37404	1.33606	1.31334	1.45661	1.2676	1.51883	1.51033	1.55389
C00253	1	1	1	9.65737	1.049	1.11781	0.961777	0.963098	0.889136	1.01282	1.03539	1.04271
C00256	1	1	1	0.00800699	2.83604	0.79536	0.70085	0.867563	0.331229	0.766594	0.852425	0.776384
C00257	1	1	1	0.417581	1.08324	1.0558	1.09281	1.09655	1.03503	1.04339	1.05597	1.05697
C00261	1	1	1	12.7501	1.20637	1.13569	1.03395	1.05154	1.027	1.07078	1.04119	1.08226
C00280	1	1	1	1.60409	0.0958541	0.103097	0.666338	0.721558	0.82773	0.164132	0.173018	0.167689
C00284	1	1	1	0.91277	1.11526	1.01225	0.902831	0.899626	0.830376	0.995372	1.0373	1.00248
C00294	1	1	1	0.31817	0.953974	0.977623	1.22863	0.982246	1.17744	1.23418	1.49024	0.949379
C00295	1	1	1	497.609	1.40745	2.70467	0.550634	0.620521	0.565314	0.733561	1.41807	1.43427
C00296	1	1	1	83.8171	0.996729	1.02798	1.01565	1.03054	1.07455	0.982523	1.00031	0.96472
C00299	1	1	1	0.327934	1.11723	1.03028	1.02472	0.936169	0.95427	1.02643	1.01799	1.00218
C00311	1	1	1	0.416221	1.13191	1.04491	1.00256	0.939808	0.947059	1.06286	1.04689	0.979548
C00318	1	1	1	1.02297	0.978267	0.981033	0.892004	0.787176	0.952962	0.920092	0.934593	0.890246
C00331	1	1	1	0.863654	1.55502	1.1579	1.02946	1.25605	0.921443	1.06456	1.08674	1.13406
C00337	1	1	1	0.43309	1.05848	1.06308	1.07042	1.13727	1.0027	1.06957	1.09519	1.09622
C00341	1	1	1	1.45876	1.09299	1.0545	0.962288	0.855043	0.861025	0.973222	1.01659	0.938386
C00354	1	1	1	2.06202	1.70592	5.28485	0.898504	1.10521	0.905235	1.02604	1.06793	1.32891
C00355	1	1	1	14.7329	1.00962	1.02996	1.07361	0.985754	1.03594	0.978379	1.0065	0.989102
C00363	1	1	1	0.443435	1.01365	1.1057	0.98798	0.922472	0.923769	1.12223	1.03853	0.935829
C00366	1	1	1	0.329804	1.09393	1.03503	0.993781	0.987167	0.967334	0.995265	0.964606	1.00374
C00380	1	1	1	2.16419	1.07669	1.14731	0.891598	0.851291	0.82369	0.99282	1.06272	1.05482
C00384	1	1	1	2.59537	1.37161	9.54637	0.989951	0.939219	0.935795	1.02396	1.08098	1.05708
C00385	1	1	1	0.346298	1.07422	1.05522	1.00895	1.05128	0.991361	1.01021	0.999032	1.01318
C00388	1	1	1	304.198	0.620129	0.63628	0.52344	0.589875	0.500537	0.489404	0.842695	0.549416
C00390	1	1	1	0.374399	0.961611	1.01392	1.04731	1.06234	1.05066	1.05626	1.0215	1.15586
C00396	1	1	1	45.3351	0.596564	0.559177	0.643017	0.631004	1.01038	0.693616	0.65427	0.575449
C00397	1	1	1	0.839026	1.07344	1.06567	1.02036	1.2403	0.908471	1.04401	1.03914	1.13193
C00399	1	1	1	0.378105	0.977782	1.01396	1.02056	2.55193	1.04317	1.49876	1.01326	1.08569
C00407	1	1	1	5.46919	1.26588	32.4925	0.986527	0.956698	0.957936	1.81016	1.1882	1.12689
C00408	1	1	1	0.325789	1.05139	0.99939	0.991833	0.930559	0.967072	1.01085	1.01382	0.983844
C00413	1	1	1	0.160174	0.994525	1.01878	0.983744	1.00195	1.03178	1.04683	1.04063	1.01063
C00415	1	1	1	5.43188	1.15256	1.19847	1.11432	1.19017	1.09305	1.28707	1.21762	1.30622
C00431	1	1	1	2.88425	1.11361	1.01076	0.980441	0.870571	0.829152	0.991581	1.03577	0.8024
C00440	1	1	1	1.20261	1.6179	1.14944	1.07365	1.39971	0.995235	1.05623	1.04239	1.38836
C00445	1	1	1	0.422837	1.05748	1.03792	1.10656	1.11035	0.988015	1.05653	1.06926	1.07027
C00448	1	1	1	0.142542	0.459489	0.457782	3.65482	10.1561	0.821898	1.69708	3.71807	8.34715
C00449	1	1	1	0.21796	1.00539	1.03717	1.00836	1.01842	1.03785	1.01642	1.03585	1.03628
C00459	1	1	1	0.144239	0.953355	0.970627	1.00723	0.988692	1.00095	0.964759	0.988217	0.970782
C00463	1	1	1	1.18699	2.7303	2.93719	3.28397	4.07672	2.87743	3.21436	3.48602	3.88309
C00472	1	1	1	0.420224	1.10412	1.16775	0.976142	1.05558	1.12436	1.07067	0.998735	1.0865
C00475	1	1	1	0.178034	1.03565	1.01308	0.985425	1.05307	1.08906	1.03234	1.03161	1.0184
C00483	1	1	1	4.8528	0.973333	0.976085	1.06785	0.882118	1.02005	0.967433	0.975579	0.973035
C00495	1	1	1	0.632409	5.19567	9.40477	0.61257	0.291348	0.277631	2.9728	3.52868	1.86561
C00499	1	1	1	1.90449	1.36265	1.05058	1.04055	1.01341	1.01273	1.13463	1.40123	1.08116
C00500	1	1	1	62.5662	1.11148	1.00143	1.05311	0.997028	0.980635	0.930074	1.03885	0.977478
C00505	1	1	1	1.83648	1.59115	1.54785	1.47308	1.55271	1.34546	1.50685	1.43286	1.46391
C00525	1	1	1	0.683041	1.06271	1.13241	0.928428	0.920307	0.900756	1.00703	1.02041	1.04112
C00526	1	1	1	3.67029	1.00936	0.970794	1.06088	1.03182	1.02165	0.981743	0.992816	1.00444
C00530	1	1	1	1.32727	1.20934	1.27546	1.16282	1.16719	0.947614	1.13892	1.16054	1.16352
C00535	1	1	1	0.0647627	0.145692	0.0942669	0.102158	0.722479	0.091596	1.86031	0.128014	0.142161
C00539	1	1	1	0.390888	1.07153	1.16547	0.910558	0.876049	1.02955	0.90311	0.901066	0.997667
C00546	1	1	1	1.3494	1.64696	2.06513	0.69284	0.613862	1.14835	0.693048	0.61526	0.781405
C00550	1	1	1	43.4059	1.26027	1.44111	1.19138	1.41014	1.26095	1.22904	1.2272	1.40364
C00571	1	1	1	8.92679	0.948981	0.866676	0.739475	1.20256	0.71541	0.692823	0.714843	0.843458
C00584	1	1	1	0.664799	0.955805	0.961061	1.10339	0.857027	0.737013	0.990665	0.820364	1.31615
C00588	1	1	1	81.569	17.8544	15.1613	1.24028	1.3711	1.19937	1.27205	1.32262	1.61963
C00596	1	1	1	0.144571	1.04463	1.15687	1.11159	1.02671	0.992451	1.065	1.01034	1.00085
C00601	1	1	1	3.74298	0.465914	0.499482	2.03193	2.54113	1.7554	2.04321	2.09846	2.49825
C00624	1	1	1	0.0118133	0.728798	0.394978	0.172071	1.28645	1.15927	1.47147	0.274188	0.890556
C00631	1	1	1	0.337587	1.19215	1.10052	0.999822	0.963725	0.975161	0.968791	1.03477	0.994487
C00633	1	1	1	11.3363	1.35737	1.35178	0.973288	1.78957	0.976342	1.02168	1.17274	1.52206
C00644	1	1	1	0.407188	1.07076	1.04626	1.12045	1.00256	0.97563	1.03548	1.03347	1.04817
C00655	1	1	1	1.24981	1.05452	1.23101	1.01559	0.92422	0.938894	0.962372	1.02327	0.956473
C00666	1	1	1	0.0677227	0.120948	0.118655	2.25366	0.572356	1.16644	1.51972	2.92848	0.565601
C00668	1	1	1	0.381242	1.06295	1.04814	0.984406	1.01042	1.00166	1.02523	1.00511	0.999274
C00670	1	1	1	0.909564	1.11134	1.0087	0.899659	0.896466	0.865327	0.991875	1.03365	0.998956
C00695	1	1	1	4.20274	0.606658	0.787667	8.077	61.5085	3.00461	9.39323	12.7456	75.6102
C00700	1	1	1	0.883814	1.15766	1.20585	1.00809	1.04424	1.02786	1.03432	1.09112	1.0715
C00703	1	1	1	0.833761	1.0565	1.04687	1.0597	1.05631	1.03222	0.992369	1.05396	1.02165
C00712	1	1	1	6.33696	0.958027	1.02422	1.11734	1.25873	1.05369	1.16452	1.09586	1.12474
C00740	1	1	1	18.9992	1.00056	0.912655	0.928836	0.889528	1.04859	0.994496	0.949363	0.962521
C00747	1	1	1	2.55547	1.35052	1.35378	0.97473	0.924779	0.921407	1.02461	1.14289	1.08392
C00753	1	1	1	0.00947192	1.79964	1.80784	1.7842	1.77688	0.904957	1.83669	1.81739	1.83928
C00757	1	1	1	0.310482	0.93995	0.912909	1.01611	0.980285	1.01246	0.989298	0.994233	0.964702
C00768	1	1	1	1.89088	1.31348	1.27799	1.02842	1.1813	1.00681	0.935531	1.03416	1.10583
C00786	1	1	1	0.559554	1.00771	1.01038	1.00443	1.01776	1.03444	0.985465	1.00047	0.996787
C00788	1	1	1	1.65245	1.09546	1.27881	1.01246	0.959674	0.910742	1.05097	1.07649	0.968845
C00791	1	1	1	4.53876	1.59356	1.7658	0.918956	0.933774	0.92584	1.0361	0.988947	1.02888
C00802	1	1	1	0.283572	1.19409	1.17783	0.993373	0.9996	0.994888	0.989241	1.03854	1.01955
C00805	1	1	1	0.60962	1.19294	1.14571	1.18503	1.17878	1.15398	1.18703	1.14725	1.2278
C00810	1	1	1	1.54535	1.53257	1.62315	1.45647	1.64776	1.42511	1.41139	1.49188	1.53134
C00813	1	1	1	5.86742	1.20042	1.14914	1.07008	1.19972	1.00576	1.13977	1.15543	1.16147
C00826	1	1	1	3.36743	1.00112	1.02129	1.01106	0.977459	1.01192	0.957696	0.998029	0.98078
C00828	1	1	1	0.457943	1.22294	1.2005	0.913545	1.0155	0.886874	0.899189	0.955971	1.00488
C00829	1	1	1	3.72667	0.922212	0.88875	1.10376	1.02503	1.08971	1.04327	1.01099	1.03695
C00830	1	1	1	0.00355786	1.74957	1.9132	0.224951	0.228082	0.94023	0.276239	1.86774	1.86541
C00837	1	1	1	0.378527	63.0682	62.691	0.703077	1.14568	0.475838	1.11741	1.20348	1.3388
C00844	1	1	1	0.312609	1.11815	1.05794	0.974665	0.974902	0.988751	0.971377	0.972437	1.02596
C00855	1	1	1	113.307	1.6761	1.76612	0.581801	1.16501	0.593851	0.640126	0.701028	1.71757
C00896	1	1	1	0.355557	1.10718	1.04757	1.00078	1.02722	0.979052	1.04229	1.01647	1.0159
C00898	1	1	1	6.49146	0.961345	1.00046	1.02187	1.03904	1.05966	0.982042	0.997951	0.971124
C00902	1	1	1	0.406278	0.9548	1.02255	1.00694	0.986769	1.06281	1.07083	1.04774	0.993196
C00903	1	1	1	0.257899	31.5528	29.6227	3.01372	6.29796	0.285782	4.04352	5.00972	8.04387
C00906	1	1	1	0.483905	1.22468	1.29163	1.17757	1.18199	0.959632	1.19547	1.14017	1.16517
C00921	1	1	1	0.149207	0.958129	1.00369	1.0304	1.00554	1.04308	0.979236	1.01808	1.01758
C00922	1	1	1	11.6909	0.441988	0.508033	0.751607	0.740753	0.670523	0.75076	0.701745	0.759055
C00928	1	1	1	15.0658	1.03884	1.04071	1.06025	0.954922	1.01279	1.04564	1.01088	1.01305
C00931	1	1	1	0.160418	0.965493	0.919462	1.96187	7.88095	1.10564	1.02858	1.11237	6.00104
C00939	1	1	1	0.661805	0.985902	0.959786	1.00499	1.17357	0.930555	1.08314	0.953442	1.16819
C00954	1	1	1	0.143411	0.712342	0.91622	0.969942	1.03068	1.03444	1.08471	0.998526	0.893186
C00986	1	1	1	1.72413	1.76875	1.95303	0.901952	1.14592	0.91414	1.06605	1.10726	1.37786
C00988	1	1	1	1.84741	1.11936	1.1188	1.08021	1.08043	1.03476	1.33214	1.13609	1.17464
C00990	1	1	1	30.0307	1.05575	1.11912	0.949045	1.03763	0.936838	1.01389	1.0211	1.0115
C01004	1	1	1	2.02805	1.08237	1.26353	1.00036	0.956997	0.899857	1.07629	1.13456	1.05028
C01010	1	1	1	0.88109	1.48196	1.1035	0.98109	1.23389	0.878152	1.01454	1.09772	1.08078
C01017	1	1	1	1.87979	1.08237	1.26353	1.00036	0.948205	0.899857	1.07629	1.11278	1.07959
C01023	1	1	1	0.386245	0.819536	0.823061	1.55409	1.82224	1.35006	1.5759	1.93886	1.67531
C01035	1	1	1	0.498984	0.971286	0.97282	1.02899	1.06462	1.02145	1.0466	1.05368	1.08364
C01041	1	1	1	0.216951	1.02568	1.03564	1.03409	1.01691	1.03678	1.01492	1.03431	1.03474
C01053	1	1	1	3.03053	1.21744	1.26232	1.03567	1.19751	0.999202	0.972504	0.995956	1.08723
C01059	1	1	1	1.03648	1.31722	1.26594	1.03135	1.15128	1.00968	0.879313	0.993353	1.03191
C01061	1	1	1	1.06264	0.814669	0.830048	0.857246	0.78868	0.937099	3.11047	0.853575	0.781782
C01068	1	1	1	0.376527	1.0498	1.03517	0.972232	0.99792	1.00308	1.01255	0.992675	0.986915
C01079	1	1	1	0.741289	3.45879	3.20659	0.535669	0.0800132	0.313938	0.627439	0.767139	0.782538
C01081	1	1	1	0.54018	0.685791	0.720722	1.76858	1.8576	1.57196	1.77121	1.7855	1.73617
C01091	1	1	1	0.283529	0.821098	0.847346	1.03719	1.60332	1.00727	0.827274	0.745308	1.51172
C01103	1	1	1	0.185153	0.262896	0.425163	0.261281	1.22693	0.367673	1.44012	0.788661	0.260906
C01104	1	1	1	0.517909	0.97338	1.00237	0.867858	0.742387	0.973687	0.911974	0.879829	0.851987
C01118	1	1	1	0.482442	3.98322	4.53853	1.00146	1.04558	1.05171	1.03152	1.01875	1.12879
C01133	1	1	1	0.425526	0.998504	2.91506	1.00418	1.10936	0.999309	1.02015	1.02258	1.08767
C01134	1	1	1	0.28813	0.961241	0.919292	0.981951	1.05362	1.06237	0.995626	0.989185	1.05429
C01136	1	1	1	0.689973	61.3284	114.011	1.04492	0.451112	0.885707	1.48344	0.477485	0.306411
C01137	1	1	1	4.80357	1.0795	1.18994	1.14875	1.29037	1.01386	1.12614	1.17544	1.23498
C01142	1	1	1	0.173847	1.05148	1.05999	1.01638	0.968611	1.01206	0.991328	1.02863	1.00385
C01143	1	1	1	0.553892	0.738923	0.711581	0.744118	0.723429	0.704222	0.707898	0.723432	0.71272
C01169	1	1	1	9.84492	5.04352	0.373028	1.23679	2.40521	0.311669	1.06906	0.568513	4.46481
C01179	1	1	1	2.59537	1.37161	1.37492	0.989951	0.939219	0.935795	1.02396	1.08098	1.05708
C01185	1	1	1	1.1336	1.08102	1.05031	0.951748	0.920012	0.851595	0.967508	1.00545	0.996059
C01194	1	1	1	0.144083	0.989755	1.00339	1.02523	1.03415	1.06152	1.03511	0.984864	1.01655
C01205	1	1	1	28.6602	3.13872	2.87584	1.71809	1.54598	0.655989	2.05249	1.99325	1.92973
C01207	1	1	1	2.60139	1.38381	1.37811	0.992248	0.969236	0.959612	1.03219	1.08349	1.05954
C01210	1	1	1	0.0571919	0.445163	0.411512	0.395339	0.429646	3.99418	0.399638	0.427198	0.424397
C01214	1	1	1	1.92797	1.11011	1.29591	0.9308	0.972505	0.922918	1.10387	1.03796	1.0173
C01215	1	1	1	0.0255453	0.326181	0.296854	0.16895	0.294269	0.168697	0.185107	0.179821	0.166982
C01227	1	1	1	0.540728	0.674321	0.673044	1.72261	9.60184	1.66276	3.39854	2.15777	9.20399
C01234	1	1	1	24.127	0.954238	1.01683	1.03094	1.04126	0.984796	0.938226	0.963006	0.985046
C01235	1	1	1	0.148146	1.01521	1.04255	1.02178	1.04024	1.07606	1.02324	1.02288	1.0352
C01239	1	1	1	0.533846	1.2462	1.2141	0.975364	1.0272	0.908625	0.960037	1.03581	1.00309
C01252	1	1	1	9.16577	0.990215	1.00979	1.00949	1.02073	1.00644	1.08001	0.993793	1.01495
C01263	1	1	1	5.42178	1.17471	1.18206	1.02858	1.09392	1.00926	1.09258	1.09968	1.06621
C01266	1	1	1	0.21937	1.00733	1.03134	1.05709	1.05478	1.0262	1.04073	1.0211	1.02172
C01267	1	1	1	12.0269	1.01526	1.01151	0.982481	0.984426	0.988156	1.05934	1.02226	0.955613
C01279	1	1	1	0.674928	0.773671	0.767254	1.67327	1.94819	1.5117	1.59077	1.7699	1.66272
C01294	1	1	1	0.223452	0.99805	1.09066	1.11442	1.05016	1.1105	1.03221	1.14859	1.01945
C01298	1	1	1	1.57094	1.30065	1.17918	1.05152	1.16637	0.921933	0.907737	0.991463	1.044
C01300	1	1	1	0.188691	1.05009	1.04737	1.03912	1.0538	0.993759	1.03144	1.0039	1.01955
C01397	1	1	1	0.959129	1.38791	1.31261	1.09692	1.26383	1.05608	1.0201	1.10096	1.1016
C01403	1	1	1	7.96073	0.254833	0.184822	0.18782	5.75186	4.60684	5.21744	0.192595	5.91981
C01407	1	1	1	4.78256	0.831484	0.799366	0.894101	0.865745	1.01996	3.00268	1.20417	1.15569
C01412	1	1	1	0.776208	1.18331	1.24399	1.12193	1.16926	1.08412	1.17744	1.17302	1.16199
C01416	1	1	1	0.174894	1.03305	1.00489	0.968049	1.00142	1.06986	1.01414	1.01342	1.00044
C01444	1	1	1	0.884017	1.48689	1.10716	0.984349	1.23799	0.881069	1.01791	1.10137	1.08437
C01451	1	1	1	0.224516	1.24205	1.22514	1.03185	1.00136	1.00409	1.02866	1.08026	1.01544
C01453	1	1	1	61.5245	1.01472	0.945669	1.06226	1.1107	1.03526	1.02777	1.06071	1.09663
C01455	1	1	1	80.4	0.370842	0.535985	1.18902	5.77589	1.57738	9.13511	6.97903	8.11923
C01468	1	1	1	1.48168	1.20216	1.29501	1.13636	1.17166	1.06662	1.20886	1.22114	1.20966
C01474	1	1	1	0.687347	1.15777	1.0587	1.00677	1.07218	1.01871	1.05689	1.03354	1.0566
C01512	1	1	1	0.325892	0.927893	0.918727	0.968528	1.01864	1.05197	0.970485	0.961309	0.969626
C01523	1	1	1	2.37687	0.798565	0.778253	1.69725	1.97612	1.53337	1.72702	1.79034	1.59122
C01526	1	1	1	0.714936	1.02407	1.04168	0.966311	1.02945	0.968281	0.968443	0.949034	0.976042
C01530	1	1	1	0.438175	1.16184	1.14362	0.949876	0.952712	0.963792	0.926834	0.921753	0.963597
C01536	1	1	1	0.87755	1.04805	1.16065	1.11522	1.03006	1.08499	1.0265	1.01364	1.04418
C01541	1	1	1	0.389877	1.08702	1.00387	0.999577	0.996535	1.02435	0.993443	1.02787	1.00233
C01546	1	1	1	0.774586	1.13769	1.11935	0.941563	0.980763	1.00397	0.99571	1.00844	1.06146
C01550	1	1	1	4.61366	1.002	1.01813	1.02457	1.03798	1.01727	0.992211	0.985117	0.992446
C01552	1	1	1	0.375441	1.07767	1.12837	0.881069	0.889161	0.872888	0.896816	0.854982	0.893814
C01563	1	1	1	0.0433256	0.323349	0.341026	0.310909	0.312078	1.42938	0.315635	0.318297	0.510076
C01569	1	1	1	78.9653	1.3178	1.23522	1.03265	1.16714	0.96591	0.975282	1.00628	1.09367
C01589	1	1	1	0.326292	1.05013	1.11316	1.00069	1.03211	1.0622	1.0706	1.01566	1.02644
C01594	1	1	1	0.992461	1.26358	1.16407	1.07407	1.10018	0.994867	0.994364	1.05091	1.07725
C01596	1	1	1	0.32004	1.13553	1.21947	1.17429	1.1466	1.0349	1.16009	1.15871	1.19709
C01598	1	1	1	0.0455862	0.889946	0.968925	2.53489	6.02476	1.67389	2.2549	3.00726	6.39751
C01617	1	1	1	0.327673	1.15714	1.0682	1.01132	0.935424	0.946523	1.04169	1.07022	0.965283
C01618	1	1	1	0.162264	1.04517	1.0604	0.974793	1.01355	1.01209	1.00158	1.00206	0.975817
C01620	1	1	1	1.66113	1.08102	1.11655	0.951748	0.920012	0.851595	0.967508	1.00545	0.996059
C01630	1	1	1	0.317552	1.07947	1.08356	1.02556	1.03013	1.032	1.0059	1.00588	1.02634
C01632	1	1	1	1.21278	1.52712	1.05858	1.14929	0.951718	1.08933	1.20175	1.08591	1.50658
C01657	1	1	1	4.8136	1.17329	1.21863	1.07563	1.14397	1.05544	1.09338	1.06301	1.03747
C01659	1	1	1	177.32	1.37761	3.53147	0.707504	0.691096	0.966917	1.27997	0.852491	0.786615
C01672	1	1	1	0.152024	1.1188	1.01174	1.04458	0.986304	1.08893	1.01734	0.975829	1.02993
C01674	1	1	1	0.215752	0.976787	0.938389	0.992085	1.00542	0.988237	0.987931	1.04057	1.00086
C01678	1	1	1	2.46837	0.51792	0.518073	0.51738	0.519737	0.518906	0.524191	0.526466	0.730914
C01683	1	1	1	1.37674	1.0631	0.994952	1.05046	1.10561	1.05833	1.02732	1.11599	1.14258
C01697	1	1	1	1.22266	0.880845	2.28441	0.17228	0.183126	0.140621	0.204899	0.160402	0.194485
C01700	1	1	1	6.03849	1.00869	1.11362	1.14403	1.26142	1.02787	1.16349	1.16199	1.22029
C01708	1	1	1	0.771331	1.05581	1.11532	0.975616	0.976956	0.821418	1.02739	1.04687	1.05771
C01727	1	1	1	0.409255	0.996378	1.00201	1.04581	1.07387	1.04916	1.05475	1.07312	1.0528
C01746	1	1	1	6.21413	1.03592	6.42035	1.05726	0.954397	0.993881	1.0427	1.00872	1.0102
C01768	1	1	1	0.197291	0.600535	0.589151	1.95425	6.60193	1.85459	1.67133	2.55104	3.80134
C01770	1	1	1	25.6133	3.62151	3.09971	0.550434	1.11933	0.531658	1.03783	0.682739	1.69145
C01784	1	1	1	0.157221	1.15416	1.25623	1.17319	1.16283	0.967964	1.15572	1.21311	1.18445
C01796	1	1	1	0.622393	2.37669	2.04503	1.25592	1.29432	1.60867	1.64576	1.03523	0.875678
C01804	1	1	1	0.486695	1.29972	1.27587	1.02828	1.07926	0.946496	0.961308	1.01599	1.06797
C01854	1	1	1	0.165787	1.20908	1.14521	1.06646	1.1784	0.887742	1.13187	1.13644	1.20082
C01857	1	1	1	0.0704857	0.511526	0.833407	0.826409	0.381804	0.660527	0.322942	0.461775	0.684445
C01864	1	1	1	0.47815	0.984878	1.03265	1.08596	1.02333	1.1101	1.00585	1.11925	1.00224
C01874	1	1	1	0.0247534	1.04909	1.04467	1.01448	1.00448	1.0156	1.01351	1.01628	1.02807
C01879	1	1	1	2.4515	1.68555	1.63627	0.935074	0.913388	0.954442	0.982921	1.1267	1.03982
C01880	1	1	1	0.19619	0.988206	1.03884	1.03982	1.00955	0.973863	1.01399	1.03084	0.996365
C01921	1	1	1	1.12052	1.00733	1.03134	1.05709	1.05478	1.0262	1.04073	1.0211	1.02172
C01964	1	1	1	0.384486	1.18332	1.09237	1.0342	0.982491	0.967935	1.06526	1.09443	0.953475
C01987	1	1	1	1.61319	1.20188	1.27836	1.16546	1.16681	0.886827	1.18318	1.12526	1.18901
C01990	1	1	1	0.793548	1.04515	1.10406	0.951965	0.928356	0.850499	1.01702	1.0143	0.986754
C01993	1	1	1	0.670733	0.959609	222.125	0.815623	0.816744	0.754021	0.858909	0.875191	0.884255
C01995	1	1	1	25.8166	3.47844	2.81649	0.223032	1.14032	0.206187	0.997769	1.02477	1.34143
C02008	1	1	1	0.180646	0.514341	0.50926	0.536865	0.890875	0.58312	9.33429	0.532864	27.0177
C02009	1	1	1	4.16188	1.24688	1.23835	0.962183	1.72692	0.981093	0.989356	1.02576	1.08255
C02010	1	1	1	0.353205	1.04453	0.98938	0.999703	1.19013	1.08072	1.03006	0.99613	1.20749
C02027	1	1	1	0.324741	1.1386	1.09991	1.04672	1.09542	1.01183	1.04292	0.995071	1.04148
C02034	1	1	1	7.52953	1.07123	1.05072	1.02788	1.00931	1.01391	0.99242	1.00955	0.971926
C02059	1	1	1	127.252	1.73518	1.47165	1.2267	1.41656	1.20095	1.27076	1.21314	1.33971
C02066	1	1	1	0.351102	0.611538	0.617361	0.93154	0.927957	0.92597	1.0413	1.0409	0.866012
C02067	1	1	1	0.352999	1.05142	1.05766	1.02333	1.03922	0.986568	0.983069	1.00704	0.977623
C02074	1	1	1	0.0247184	0.0828369	0.0829267	4.82663	4.06954	4.42077	2.43096	0.881461	3.74777
C02075	1	1	1	0.82451	1.0601	1.17202	0.957131	0.998656	0.942961	0.94157	1.43247	1.14332
C02078	1	1	1	0.214483	0.272168	0.296029	1.15722	0.262886	1.51765	0.929287	1.02565	0.60776
C02115	1	1	1	37.7283	0.996119	1.06146	0.913294	0.914549	0.95556	0.943926	0.983197	0.990144
C02126	1	1	1	0.00130247	0.115238	0.0660005	0.0494255	0.586046	0.0602733	1.15587	0.0114623	0.950695
C02134	1	1	1	1.18448	1.03462	1.12817	0.99642	0.906777	0.921174	0.911868	0.96018	0.983805
C02137	1	1	1	0.397423	1.10806	1.0233	1.00262	1.01582	1.03431	1.0083	1.00851	1.02173
C02174	1	1	1	5.58944	1.08745	1.04712	1.03921	1.01233	1.00661	0.97895	0.996227	1.0007
C02199	1	1	1	0.679225	1.32232	1.08413	1.01381	0.995911	0.907442	1.04838	1.13433	0.961021
C02214	1	1	1	1.18448	1.14031	1.12817	0.99642	0.906777	0.921174	0.911868	0.96018	0.983805
C02218	1	1	1	20.021	1.09955	0.998003	0.890121	0.886961	0.856153	0.981359	1.02269	0.988365
C02223	1	1	1	0.0904545	0.0791628	0.0892498	0.0813273	0.0798753	0.0859333	0.0783806	0.0763323	0.0842627
C02224	1	1	1	0.773154	1.06254	1.11058	1.02579	1.12795	0.991589	0.988346	1.00868	1.0623
C02234	1	1	1	1.11689	0.925889	0.978076	0.815245	0.711966	0.736345	0.884261	0.841072	0.798813
C02240	1	1	1	2.48428	1.32151	1.31607	0.947577	0.925601	0.95055	1.02048	1.14176	1.05372
C02242	1	1	1	0.0938765	0.966475	0.969371	0.970946	1.07943	0.892867	1.39919	1.3409	1.4669
C02243	1	1	1	0.430527	0.929414	0.956184	1.0424	1.1224	1.02062	1.04467	1.0346	1.10046
C02304	1	1	1	0.680955	1.01819	0.93414	1.00059	0.921056	1.02429	1.00838	1.06593	1.00244
C02334	1	1	1	0.055831	0.931573	1.3491	0.226939	1.47836	0.365699	1.3713	1.32428	1.37802
C02341	1	1	1	0.0799863	0.819625	2.96743	2.71232	2.70803	0.476876	0.836716	2.72922	0.90939
C02351	1	1	1	0.904337	1.22406	1.29098	1.17697	1.18139	0.959144	1.19486	1.17466	1.16696
C02362	1	1	1	0.147571	1.015	0.987016	1.02824	1.00789	1.03456	1.00882	1.02418	0.99073
C02366	1	1	1	108.815	5.00609	1.08429	1.79545	3.26595	0.76269	1.94496	3.24693	2.74336
C02367	1	1	1	0.862017	1.26234	1.27475	1.06552	1.12576	1.01846	0.956307	1.01894	1.1184
C02372	1	1	1	0.399934	1.0697	0.996908	1.05293	1.10778	1.05592	1.07263	1.11818	1.14482
C02376	1	1	1	0.160362	1.22527	1.30324	1.18815	1.18952	0.904088	1.20621	1.11391	1.17564
C02389	1	1	1	0.15134	5.1146	1.90451	1.8549	1.31638	0.832444	1.335	1.40223	1.78023
C02395	1	1	1	4.31367	0.532234	0.530763	1.87722	4.27823	1.02441	3.10169	3.47405	3.68196
C02413	1	1	1	0.00663654	2.0645	3.67773	2.1213	1.60298	2.08404	2.08012	2.92972	2.42275
C02420	1	1	1	35.3462	1.3203	1.53177	1.09879	1.21536	0.981268	1.04623	1.36694	1.18547
C02445	1	1	1	0.172065	0.96701	0.927571	0.961693	0.930102	1.03435	1.01828	0.929751	0.981419
C02455	1	1	1	1.53579	0.425395	0.46387	0.717183	0.641081	0.743375	0.643713	0.715516	0.728536
C02486	1	1	1	1.60339	1.09955	7.80763	0.968066	0.886961	0.856153	0.981359	1.02269	0.988365
C02494	1	1	1	1.92797	1.11011	1.29591	0.9308	0.972505	0.922918	1.10387	1.03796	1.0173
C02499	1	1	1	2.26664	1.24951	1.15513	1.00652	1.18912	1.02302	0.929015	1.00949	1.05842
C02502	1	1	1	34.4288	1.11011	1.62964	0.969339	0.972505	0.922918	1.10387	1.1413	1.10726
C02571	1	1	1	4.73418	1.26588	2.201	0.986527	0.956698	0.957936	1.06523	1.1882	1.12689
C02572	1	1	1	1.21169	1.63012	1.15812	1.05072	1.33499	0.967624	1.04563	1.04923	1.39885
C02590	1	1	1	0.952822	1.11075	1.07801	0.955769	1.046	0.940479	0.996919	1.00667	1.04376
C02604	1	1	1	1.86383	1.08237	1.26353	1.00036	0.956997	0.899857	1.07629	1.13456	1.05028
C02617	1	1	1	1.21169	1.63012	1.15812	1.05072	1.33499	0.967624	1.04563	1.04923	1.39885
C02621	1	1	1	0.420493	1.02374	1.02953	1.05161	1.10335	1.06769	1.05249	1.10259	1.07371
C02628	1	1	1	0.773455	0.969653	0.986247	1.01857	1.04011	0.993858	0.991725	1.00776	0.997958
C02630	1	1	1	0.88109	1.48196	1.1035	0.98109	1.23389	0.878152	1.01454	1.09772	1.08078
C02633	1	1	1	97.4108	1.25638	1.22403	1.02066	1.06427	1.00595	1.01989	1.04427	1.04569
C02636	1	1	1	0.878468	1.0664	6.66432	1.07472	1.15399	0.936033	0.977444	1.07064	1.14275
C02640	1	1	1	0.175676	0.998115	1.06939	1.00071	1.00666	0.981082	0.972734	0.952586	0.961876
C02646	1	1	1	0.521808	0.908426	0.873336	0.81523	0.945858	1.11434	0.792289	0.76967	0.963512
C02647	1	1	1	1.92797	1.11011	4.62343	0.9308	0.972505	0.922918	1.10387	1.03796	1.0173
C02648	1	1	1	28.777	1.09299	1.12892	0.962288	0.881667	0.861025	0.975501	1.01659	0.982466
C02659	1	1	1	22.2724	2.3962	1.7378	0.284643	1.51181	1.08399	0.378438	0.179232	1.97749
C02678	1	1	1	0.930977	1.02618	1.0582	1.06588	1.13788	0.979765	1.05135	1.04232	1.12486
C02683	1	1	1	0.379915	1.26565	1.21415	0.949049	0.969676	0.926272	0.936088	0.911226	0.938651
C02703	1	1	1	2.21372	1.67272	1.62382	0.927958	0.906437	1.16687	0.974097	1.11812	1.03172
C02704	1	1	1	0.221102	1.50294	1.50229	0.724263	0.884588	0.702066	1.23167	1.02976	0.749364
C02724	1	1	1	3.093	1.08237	1.26353	1.00036	0.956997	0.899857	0.987791	1.13456	1.05028
C02726	1	1	1	3.84267	1.18277	1.08682	0.995699	1.02469	1.02313	1.02141	1.04617	1.07855
C02730	1	1	1	0.989822	1.41645	1.11632	1.06326	1.38616	0.985606	1.04601	1.06783	1.20669
C02735	1	1	1	0.909564	1.11134	1.0087	0.972221	0.896466	0.865327	1.39779	1.03365	0.998956
C02771	1	1	1	7.5372	0.997171	1.01197	1.00465	1.00357	1.02506	0.98968	0.983918	0.963558
C02777	1	1	1	0.367101	0.820035	0.962828	1.03345	0.995124	1.07031	1.03977	1.08455	1.04959
C02787	1	1	1	3.30115	1.14976	1.14371	1.41339	1.35074	1.4561	1.34391	1.35522	1.34373
C02794	1	1	1	6.06084	1.03619	0.996605	1.05087	1.05925	1.04784	0.981417	0.974225	1.03115
C02845	1	1	1	0.99444	1.04895	1.00662	1.00632	1.01752	1.06817	1.07662	0.990674	1.03221
C02862	1	1	1	6.67907	1.22032	1.27803	1.02671	1.21298	0.955112	0.988653	1.02974	1.07966
C02890	1	1	1	0.275114	0.530251	0.547202	1.30672	3.33375	0.650476	9.71379	1.44617	2.54312
C02916	1	1	1	0.926193	1.55782	1.15998	1.02321	1.29706	0.923105	1.06648	1.07401	1.1361
C02918	1	1	1	1.92581	1.72011	1.78643	0.905978	1.1144	0.912765	1.03457	1.07681	1.33997
C02923	1	1	1	7.69624	1.45471	1.61678	0.951007	0.928952	0.970705	0.998293	1.1459	1.05735
C02927	1	1	1	22.2299	2.31638	1.65337	1.26937	0.436644	0.158079	0.357794	0.431468	0.183389
C02937	1	1	1	1.29428	0.846213	1.53498	1.45485	1.57981	1.29749	1.38699	1.6106	1.55914
C02947	1	1	1	1.21169	1.63012	1.15812	1.25592	1.33499	1.02513	1.18938	1.16933	1.41779
C02951	1	1	1	0.750945	1.53139	1.1403	1.01381	1.08729	0.907442	1.04838	1.07023	1.11682
C02954	1	1	1	27.9571	1.01843	1.00397	1.00509	1.1056	0.993124	0.99674	1.00599	1.04872
C02979	1	1	1	0.175661	1.09364	1.08367	1.05997	1.05303	1.02417	0.999377	1.07816	1.05757
C02990	1	1	1	0.416579	0.773327	0.772366	1.66392	1.92418	1.54343	1.70347	1.74965	1.68734
C03002	1	1	1	0.009491	0.0557982	0.0588539	0.054377	0.0567199	0.0629565	0.0555892	0.0559597	0.0561735
C03007	1	1	1	3.58262	1.20934	1.27546	1.16282	1.16719	0.947614	1.1805	1.16054	1.16352
C03017	1	1	1	1.92797	1.11011	1.29591	0.9308	0.972505	0.922918	1.10387	1.03796	1.0173
C03019	1	1	1	0.165298	0.918253	0.972035	1.03167	1.02863	1.03916	1.03736	1.07236	1.03476
C03032	1	1	1	7.5372	1.04886	1.05242	1.02297	1.0065	1.02506	0.98968	1.00388	0.963558
C03033	1	1	1	6.65337	1.05009	1.05858	0.997901	1.00438	0.995899	1.03245	1.01157	0.90704
C03047	1	1	1	6.10843	0.966426	1.0332	1.12714	1.26977	1.06293	1.17473	1.07431	1.1346
C03059	1	1	1	18.0291	1.02538	1.02722	1.0465	0.990875	1.02028	1.05149	1.04648	1.05712
C03065	1	1	1	0.501493	1.04442	1.0463	1.06594	0.960049	1.01823	1.05125	1.00129	1.01849
C03066	1	1	1	0.0276581	2.54382	2.62551	0.178076	0.214273	0.012142	0.317424	0.310999	0.813724
C03093	1	1	1	0.32306	1.04258	0.99102	0.983527	0.922766	0.958973	1.00238	1.00533	0.975605
C03113	1	1	1	0.0590463	0.909856	0.890549	0.811118	0.315118	1.00155	0.468242	0.399662	0.338438
C03124	1	1	1	0.884017	1.48689	1.10716	0.984349	1.23799	0.881069	1.01791	1.10137	1.08437
C03134	1	1	1	3.91415	0.801957	0.802765	1.49164	1.77891	1.36568	1.51586	1.84952	1.66571
C03137	1	1	1	0.149108	0.990294	0.996202	1.01613	1.01839	1.04533	1.01933	0.968012	1.00105
C03150	1	1	1	0.363732	1.07378	1.05478	1.02379	1.05084	0.990947	1.06625	1.03984	1.03801
C03154	1	1	1	0.221643	0.987027	1.04203	1.06805	1.06571	1.03683	1.05151	1.03168	1.02537
C03167	1	1	1	0.173802	1.07008	1.03442	1.01741	1.01781	0.991923	1.01618	1.07167	1.02124
C03169	1	1	1	13.1042	0.998485	1.00031	1.03885	1.02832	1.0263	0.977871	0.974287	0.96203
C03183	1	1	1	1.12341	1.38859	1.16668	0.928709	1.23945	0.974772	1.02165	1.02422	1.02672
C03196	1	1	1	4.07356	0.985958	1.05859	1.07096	1.00381	1.02986	1.00302	0.989163	0.976823
C03205	1	1	1	0.380408	1.21995	1.24516	0.946565	1.05394	0.928581	0.944112	0.942755	1.01181
C03210	1	1	1	0.154173	0.964735	0.931494	1.04207	1.01706	0.994953	0.981588	1.01177	1.01092
C03215	1	1	1	0.48244	0.956501	0.995826	1.02233	1.03083	1.03492	0.971567	1.01011	1.00962
C03218	1	1	1	0.428117	1.13517	1.11737	0.928073	0.94185	0.9525	0.944661	0.959183	0.941498
C03219	1	1	1	1.73095	1.77575	1.84422	0.90552	1.15045	0.917757	1.53176	1.11164	1.38331
C03228	1	1	1	186.385	1.35572	1.35014	0.972106	0.949562	0.940133	1.02185	1.13982	1.081
C03232	1	1	1	2.31917	1.01526	1.01151	0.982481	0.984426	0.988156	1.05934	1.02226	0.955613
C03283	1	1	1	0.266136	1.20766	1.23106	1.16035	1.16557	0.948567	1.13734	1.1888	1.1619
C03292	1	1	1	5.51062	1.08426	1.03962	0.992444	1.11761	0.940698	0.981829	0.970056	1.05117
C03299	1	1	1	0.377286	1.13725	1.03055	0.936725	0.999718	0.938415	0.924594	0.969795	0.999648
C03373	1	1	1	1.72413	1.76875	1.95303	0.901952	1.14592	0.91414	1.06605	1.04437	1.37786
C03406	1	1	1	0.23234	1.1426	1.07271	0.997148	1.05813	1.00537	1.04304	1.04857	1.04276
C03411	1	1	1	0.282369	1.10086	1.09172	1.10943	1.01803	1.09034	1.12558	1.13764	0.97919
C03414	1	1	1	1.04624	2.89968	2.96653	0.525258	0.771098	0.411598	0.455445	0.593129	0.522087
C03434	1	1	1	0.256409	0.817415	0.776988	0.772625	2.87304	0.730704	0.767134	0.749942	0.726352
C03470	1	1	1	0.20585	1.12826	1.10339	1.05529	1.03433	0.980835	1.06815	1.14085	1.08287
C03494	1	1	1	0.0197368	0.571413	0.477991	0.292772	0.78258	0.439885	1.55395	0.35821	1.65152
C03495	1	1	1	1.02176	1.27005	1.12812	1.09757	1.43089	1.01741	1.07976	1.06561	1.07144
C03506	1	1	1	2.44705	1.2671	1.33822	0.98748	0.919848	0.93269	1.06625	1.18935	1.12798
C03515	1	1	1	2.70599	1.07962	1.06377	1.0384	1.05621	1.05741	1.01233	0.9834	0.987451
C03526	1	1	1	0.959635	1.61407	1.20187	1.03084	1.34389	0.95625	1.05517	1.11279	1.17712
C03576	1	1	1	0.27611	1.20372	1.10667	1.08082	1.06833	0.965064	1.12046	1.22841	1.1612
C03584	1	1	1	0.961266	2.70614	3.8032	0.67624	0.807654	0.551971	0.865837	0.629616	2.87451
C03592	1	1	1	0.0234112	1.10318	1.07134	0.863422	1.01543	0.64319	0.526974	0.629526	0.690203
C03626	1	1	1	1.72413	1.76875	1.95303	0.901952	1.14592	0.91414	1.06605	1.04437	1.37786
C03657	1	1	1	0.959635	1.61407	1.20187	1.03084	1.34389	0.95625	1.05517	1.11279	1.17712
C03661	1	1	1	0.357832	1.09502	1.07565	1.04405	1.0563	0.996552	1.08735	1.01837	1.05854
C03690	1	1	1	0.0524056	1.44571	0.73654	1.98248	2.18879	0.182722	2.05628	1.35139	2.0667
C03691	1	1	1	5.57376	5.56349	2.7398	1.39959	1.69133	1.56119	1.38861	1.32687	1.13389
C03725	1	1	1	0.740496	1.15316	1.12176	1.05886	1.17449	0.973462	1.07959	1.09911	1.13022
C03750	1	1	1	1.12341	1.38859	1.16668	0.966566	1.34485	0.974772	1.05335	1.05698	1.1959
C03767	1	1	1	0.193816	0.934763	1.0007	0.999212	1.11153	0.957709	1.04185	1.00266	1.10338
C03837	1	1	1	1.12341	1.38859	1.16668	0.966566	1.34485	0.974772	1.05335	1.05698	1.1959
C03840	1	1	1	0.000605284	0.657376	0.607133	0.937102	0.735841	0.958813	1.06424	1.05623	0.837708
C03861	1	1	1	0.217392	0.996936	1.00197	1.00805	1.00584	1.00428	1.04297	1.00069	1.02124
C03872	1	1	1	0.184965	1.04596	0.984083	1.03196	1.07124	1.00634	0.999021	1.044	1.05647
C03882	1	1	1	0.352853	1.0718	1.15324	0.969319	0.847547	1.06251	1.00578	0.942386	0.804208
C03912	1	1	1	3.48944	0.810482	0.897196	1.06449	1.02006	1.09916	0.772838	0.799399	0.833149
C03930	1	1	1	0.615204	1.05832	1.04174	0.977109	1.10445	1.01866	0.958339	0.963643	1.08634
C03943	1	1	1	17.8671	0.646902	1.34875	2.39877	1.71584	1.53778	1.21269	2.19696	1.25357
C03954	1	1	1	1.21169	1.63012	1.15812	1.08156	1.33499	1.02513	1.13092	1.04923	1.41779
C03958	1	1	1	4.10206	6.24462	5.74185	0.865716	4.8406	1.3522	1.55711	4.96914	3.62607
C03972	1	1	1	0.195229	1.03614	1.01732	0.961041	0.982238	0.940738	0.981044	0.962847	0.986482
C03982	1	1	1	5.47905	2.24005	2.45668	0.450503	0.43933	0.640504	0.481289	0.480004	0.466966
C04006	1	1	1	1.00957	1.10786	1.02588	4.85574	1.02404	0.887509	0.750243	1.41483	0.803211
C04015	1	1	1	1.08801	1.06422	1.02763	1.0301	1.0325	1.01983	1.02491	1.06746	1.05543
C04020	1	1	1	0.0637506	0.817067	2.51293	0.280255	0.813133	0.296637	0.387235	0.295586	1.53987
C04022	1	1	1	1.98324	1.21672	1.08938	1.10162	1.06547	0.974532	1.1231	1.2481	0.983999
C04033	1	1	1	0.0661909	1.478	1.49796	0.987223	1.04907	0.945522	1.0907	1.09426	1.17229
C04039	1	1	1	137.989	1.227	1.2731	1.03719	1.1578	1.01539	0.884288	0.998973	1.03775
C04067	1	1	1	0.187338	1.05528	1.00871	1.0204	0.955408	0.985432	0.909034	0.943459	1.03692
C04070	1	1	1	0.17983	1.01626	0.987401	1.03469	1.03138	1.00874	0.968947	0.981961	0.987073
C04071	1	1	1	0.160666	1.03609	1.05016	1.01069	1.00922	1.00859	1.01217	1.02557	1.02376
C04084	1	1	1	0.298334	1.07016	1.10655	1.10391	1.03186	1.03649	1.11968	1.15309	1.0455
C04100	1	1	1	24.3706	1.54965	1.66207	1.29746	1.51457	1.23361	1.42442	1.47729	1.46283
C04102	1	1	1	0.397744	0.738361	0.737444	1.66977	1.86566	1.476	1.62645	1.62843	1.65945
C04104	1	1	1	59.3515	1.22581	1.16846	0.976834	1.11623	0.932732	0.938139	0.973044	1.06339
C04114	1	1	1	0.356308	1.03608	1.00784	1.04794	0.976459	1.04538	1.0436	1.03512	1.01729
C04122	1	1	1	2.65544	3.13442	0.0826205	10.8005	9.28727	0.0195023	2.94738	3.1508	5.36778
C04144	1	1	1	0.238078	1.04091	1.009	1.03616	0.997549	1.01792	1.04715	1.02364	1.02534
C04152	1	1	1	0.00397922	0.675898	0.629354	1.3314	1.35605	1.274	1.33939	1.45602	1.05516
C04164	1	1	1	1.12341	1.38859	1.16668	0.928709	1.23945	0.974772	1.02165	1.02422	1.02672
C04166	1	1	1	0.486993	0.903056	0.940352	1.0537	1.17999	1.10709	1.0483	1.07552	1.1595
C04167	1	1	1	0.0951885	4.60045	6.1566	0.428677	0.166402	0.021958	0.611929	0.556376	0.714808
C04181	1	1	1	0.508615	0.925578	0.913457	1.08108	0.893045	1.01627	0.938367	0.955397	0.985088
C04185	1	1	1	1.91898	1.59068	1.82373	0.949103	0.964408	0.956213	1.07009	1.02139	1.06263
C04197	1	1	1	1.21169	1.63012	1.15812	1.08156	1.33499	1.02513	1.13092	1.04923	1.41779
C04210	1	1	1	1.31939	1.22324	1.26449	0.985361	1.16413	1.00152	0.948836	0.988269	1.05119
C04216	1	1	1	0.305443	0.980146	0.994734	1.26752	0.960073	1.10925	1.04343	1.19108	0.979429
C04236	1	1	1	0.0808076	0.733258	2.03159	3.17226	1.54444	0.46215	0.39111	0.799973	0.717955
C04251	1	1	1	0.325954	1.14286	1.10402	1.05063	1.16357	1.0566	1.04681	0.998789	1.18054
C04275	1	1	1	0.124773	1.56443	1.6005	1.89773	2.04411	1.56493	1.79099	1.50035	2.10276
C04277	1	1	1	0.143019	1.03342	1.14445	1.09966	1.01569	1.0453	1.05357	0.9995	1.02961
C04282	1	1	1	0.972467	1.10141	1.04331	0.977076	1.06932	0.943958	1.01914	0.951946	0.962503
C04297	1	1	1	0.649578	1.07979	1.10002	1.0333	1.09495	0.97574	0.98342	0.969594	1.04737
C04302	1	1	1	0.804424	1.05241	1.07865	1.2722	1.37781	1.04036	1.26497	1.69312	1.42092
C04308	1	1	1	0.125776	8.48621	12.9152	1.01464	1.74941	1.02021	0.796095	0.799172	1.41388
C04411	1	1	1	0.870451	1.165	1.26947	0.960217	1.20429	0.97663	0.978009	1.02699	1.08575
C04421	1	1	1	0.937329	1.09318	1.08153	0.986955	0.876355	0.782842	0.998169	1.01803	0.943139
C04446	1	1	1	3.542	0.969293	1.00008	1.02536	1.00811	1.04418	0.97906	0.964805	0.979563
C04454	1	1	1	0.322719	0.960974	0.96911	0.979048	1.06427	1.07051	1.0264	0.996767	1.06237
C04483	1	1	1	0.00388871	0.000995186	0.00134733	3.82221	4.38289	2.36185	4.49731	4.7189	4.92703
C04485	1	1	1	0.204925	1.22383	1.13293	1.01671	1.00973	0.989358	1.01246	1.06442	1.00055
C04487	1	1	1	0.422075	1.26023	1.22107	0.936141	1.04233	0.918355	0.933715	0.945828	1.00066
C04500	1	1	1	1.21166	1.06079	1.03997	1.3309	2.7165	1.66678	2.62663	3.11791	2.95633
C04521	1	1	1	0.436193	1.04079	1.05061	1.08171	1.14542	1.01922	1.07723	1.10303	1.10169
C04529	1	1	1	0.362642	0.422938	0.914789	2.1693	0.348545	0.624335	0.506375	0.49738	0.312502
C04534	1	1	1	1.15094	1.02614	1.05817	1.00464	1.13784	0.979729	1.05131	1.02229	1.12482
C04544	1	1	1	0.319156	1.10811	5.93927	0.98669	0.999962	0.979872	0.962654	0.973659	1.01675
C04546	1	1	1	0.152831	1.13706	1.23762	1.16654	1.1456	0.95362	1.14339	1.10316	1.16809
C04556	1	1	1	0.275564	0.735157	0.304396	1.14578	0.974615	0.107285	1.26558	0.835426	2.25399
C04584	1	1	1	0.018068	1.10017	1.08086	1.03107	0.95856	0.969948	0.985312	1.01538	0.928554
C04586	1	1	1	6.07003	0.967833	1.00477	1.0629	1.04679	1.03657	0.995134	0.985647	0.970002
[truncated: 1,286 more rows]
