# Supplementary material for: β-catenin driven innate and metabolic reprograming in macrophages fuel T-cells dependent inflammation in Toxoplasma gondii infection: implications for therapeutic intervention
Source: Research Square preprint supplement (doi:10.21203/rs.3.rs-8453530/v1), 2026-02-09
Supplement: Supplementary file 3 [file CD8_METABOLITES_final.xlsx]

## Sheet: Sheet1
Sample	CD8+1	CD8+2	CD8+3	CD8+ I1	CD8+ I5	CD8+ I6	CD8+ I+D1	CD8+ I+D2	CD8+ I+D3	CD8+ U+D1	CD8+ U+D2	CD8+ U+D3		CD8+ I2	CD8+ I3	CD8+ I4	CD8+ I+D1	CD8+ I+D2	CD8+ I+D3	CD8+ U+D1	CD8+ U+D2	CD8+ U+D3
Label	UNINFECTED	UNINFECTED	UNINFECTED	INFECTED	INFECTED	INFECTED	INFECTED+D	INFECTED+D	INFECTED+D	UNINFECTED+D	UNINFECTED+D	UNINFECTED+D	AVG(UNINFECTED)	INFECTED	INFECTED	INFECTED	INFECTED+D	INFECTED+D	INFECTED+D	UNINFECTED+D	UNINFECTED+D	UNINFECTED+D
C00062	502364	577249	576681	549043	567669	565623	498180	478596	485404	483545	496008	489777	535504	2.66447	0.995408	4.85828	0.930301	0.893729	0.906443	0.902971	0.926245	0.914608
C00079	1.51911e+06	1.56478e+06	1.50914e+06	1.5938e+06	1.51417e+06	1.65075e+06	1.62589e+06	1.45512e+06	1.59596e+06	1.60478e+06	1.5531e+06	1.57894e+06	1.51765e+06	1.06766	1.03494	1.04007	1.07132	0.958794	1.0516	1.05741	1.02336	1.04038
C00431	1.01734e+06	1.08482e+06	1.08332e+06	1.03932e+06	1.02504e+06	1.09495e+06	947972	5.38819e+06	991898	945602	1.00119e+06	973397	1.02598e+06	0.981168	1.0582	1.07287	0.923965	5.25174	0.966778	0.921655	0.975837	0.948746
C06044	1.89326e+07	4.5615e+06	4.69949e+06	3.18931e+07	4.43066e+06	2.85046e+07	2.97719e+07	3.0825e+06	8.97708e+07	2.70493e+07	1.92432e+08	1.09741e+08	1.17023e+07	2.32836	0.445044	0.396134	2.54412	0.263411	7.67124	2.31146	16.444	9.37775
C21283	708663	722342	692618	686060	714655	702876	626220	599822	638400	670394	608606	639500	703853	1.04621	0.862469	0.999397	0.889703	0.852198	0.907008	0.952464	0.864678	0.908571
C09106	1.92817e+07	2.5816e+06	3.5926e+06	1.71502e+06	1.28954e+06	3.4933e+06	3.00066e+06	1.4253e+07	1.96477e+06	1.07259e+06	762310	917449	6.71548e+06	0.747974	0.279496	4.16004	0.446828	2.12241	0.292574	0.159719	0.113515	0.136617
C00463	1.43914e+07	2.11742e+07	3.6284e+06	9.13557e+06	1.06638e+08	1.11473e+08	1.31743e+08	1.04108e+07	1.24613e+08	1.01781e+08	1.28894e+08	1.15338e+08	3.00993e+07	3.6234	3.31649	0.357928	4.37695	0.345883	4.14005	3.3815	4.28229	3.8319
C00588	4.64471e+06	1.86599e+06	1.90553e+06	4.71584e+06	5.79849e+06	5.1033e+06	5.45799e+06	5.51242e+06	4.90658e+06	4.89425e+06	5.46577e+06	5.18001e+06	3.18674e+06	1.44473	1.76947	1.72562	1.71272	1.7298	1.53969	1.53582	1.71516	1.62549
C15846	3.83393e+08	2.63582e+06	2.59905e+06	4.80205e+08	2.63265e+06	4.61221e+08	5.12081e+08	2.50556e+06	5.43361e+08	5.18726e+08	5.27026e+08	5.22876e+08	2.0243e+08	2.01885	0.0125117	0.0133427	2.52967	0.0123774	2.68419	2.56249	2.6035	2.58299
C00666	1.74594e+06	425419	425178	3.99413e+06	430345	6.5454e+06	2.33571e+06	457557	6.14459e+06	1.28358e+07	1.04204e+07	1.16281e+07	4.04244e+06	2.44695	0.110886	0.108534	0.577797	0.113188	1.52002	3.17525	2.57775	2.8765
C00037	2.84214e+06	2.64418e+06	2.26784e+06	3.58462e+06	4.86942e+06	3.495e+06	2.92146e+06	3.87139e+06	2.98796e+06	2.85693e+06	3.38201e+06	3.11947e+06	2.61925e+06	1.58805	1.67059	1.92805	1.11538	1.47805	1.14077	1.09074	1.29121	1.19098
C16396	1.75458e+06	1.69569e+06	1.55986e+06	3.63809e+06	2.18876e+06	1.96558e+06	1.97377e+06	1.97731e+06	2.00342e+06	1.81095e+06	1.97134e+06	1.89114e+06	1.66712e+06	1.55048	1.24477	1.26073	1.18394	1.18606	1.20172	1.08628	1.18248	1.13438
C00009	3.82473e+06	4.07839e+06	4.07275e+06	4.119e+06	4.73519e+06	4.11648e+06	3.56393e+06	4.51626e+06	3.72906e+06	3.56134e+06	3.76401e+06	3.66267e+06	3.91426e+06	1.13665	1.44779	1.74424	0.910499	1.1538	0.952688	0.909837	0.961614	0.935726
C09469	2.05631e+06	938897	909383	1.98818e+06	1.13215e+06	2.70837e+06	8.3786e+06	1.01858e+06	1.99045e+06	1.61455e+06	2.45457e+06	2.03456e+06	1.61877e+06	1.37082	0.682132	0.685368	5.17589	0.62923	1.2296	0.997391	1.51631	1.25685
C00064	386388	372613	368731	432378	576327	448647	468961	560190	444172	432137	469557	450847	376284	5.69579	1.46624	2.10685	1.2463	1.48874	1.18042	1.14843	1.24788	1.19816
C07073	616858	648926	610272	640928	556677	628997	617951	550026	628657	603609	597320	600465	614895	0.997957	0.895147	0.897269	1.00497	0.894505	1.02238	0.981646	0.971419	0.976533
C00106	1.64349e+06	1.63233e+06	1.69822e+06	1.53834e+06	1.64271e+06	1.63375e+06	1.39583e+06	1.45616e+06	1.46489e+06	1.40314e+06	1.47434e+06	1.43874e+06	1.61783e+06	1.02436	0.962517	1.02435	0.862777	0.900068	0.905465	0.867295	0.911302	0.889298
C01530	1.06416e+06	1.23503e+06	1.16045e+06	1.1717e+06	1.26999e+06	1.12662e+06	1.20766e+06	1.19323e+06	1.12697e+06	1.08093e+06	1.04779e+06	1.06436e+06	1.14093e+06	0.982569	1.1315	1.07023	1.05849	1.04585	0.987771	0.947411	0.91837	0.93289
C01207	340096	288600	241592	345173	409069	364567	313171	354837	322073	322245	338023	330134	307113	1.19833	1.31372	1.32176	1.01972	1.1554	1.04871	1.04927	1.10065	1.07496
C03033	918294	964018	897463	913789	916088	905775	967078	962929	904245	956335	918584	937459	925482	0.993148	1.0778	1.04803	1.04495	1.04046	0.977053	1.03334	0.992547	1.01294
C02413	9.0696e+06	6.90348e+07	5.86039e+07	9.66998e+06	4.59792e+07	7.38149e+07	6.8512e+07	1.01138e+07	9.01572e+06	9.16949e+06	5.58244e+07	3.2497e+07	3.66576e+07	1.99772	0.251538	0.261928	1.86897	0.275899	0.245944	0.250139	1.52286	0.886501
C03232	9.70705e+06	9.31201e+06	9.53884e+06	9.38521e+06	9.78906e+06	9.19629e+06	9.62514e+06	9.46483e+06	9.77342e+06	9.49906e+06	9.27757e+06	9.38831e+06	9.46576e+06	0.981856	0.993241	0.992033	1.01684	0.999903	1.0325	1.00352	0.980119	0.991819
C12570	4.18559e+06	2.22868e+06	1.82659e+06	4.83816e+07	2.32588e+06	1.17722e+07	2.88986e+06	2.36101e+06	3.4324e+06	2.64356e+06	1.68869e+06	2.16612e+06	2.17009e+07	1.5884	0.0999175	0.0995859	0.133168	0.108798	0.158169	0.121818	0.0778166	0.0998173
C02724	307283	352869	323288	397175	374135	369401	331732	346778	338754	336411	351690	344050	328845	1.15897	1.14706	13.8306	1.00878	1.05453	1.03013	1.02301	1.06947	1.04624
C03299	884073	965031	950681	984881	1.12661e+06	930899	950057	899966	894688	907811	887174	897493	932577	1.01651	1.26469	1.1008	1.01874	0.965031	0.959371	0.973443	0.951315	0.962379
C00078	276857	275314	274998	302792	287390	312905	289283	308279	288863	300993	293426	297209	274665	1.09817	1.08376	1.11605	1.05322	1.12238	1.05169	1.09585	1.06831	1.08208
C15486	1.0445e+06	1.11742e+06	1.06844e+06	1.05875e+06	1.00428e+06	1.08307e+06	936581	882096	953050	1.00121e+06	937810	969510	1.08316e+06	0.996514	0.883867	1.05692	0.864672	0.81437	0.879876	0.924339	0.865806	0.895073
C07550	350882	357197	321802	378497	438830	396406	436324	600901	416424	363528	445799	404664	345312	1.14605	1.45386	1.20375	1.26356	1.74017	1.20593	1.05275	1.291	1.17188
C01678	1.48146e+06	1.49847e+06	1.58489e+06	1.54657e+06	5.2792e+06	1.54334e+06	7.83195e+06	8.73936e+06	1.47938e+06	1.88621e+06	1.52043e+06	1.70332e+06	1.5658e+06	0.973673	9.06373	0.950801	5.00189	5.58141	0.944812	1.20464	0.971028	1.08783
C12986	174489	175992	170084	182296	177438	181277	181165	178733	183549	175524	174634	175079	173270	1.06358	1.05768	1.01783	1.04557	1.03153	1.05932	1.01301	1.00787	1.01044
C17362	208828	205603	203461	220305	1.62632e+06	228037	291345	309106	621195	213337	259096	236216	206308	1.27813	6.24987	1.18461	1.41218	1.49827	3.011	1.03407	1.25587	1.14497
C06475	1.29689e+06	1.36146e+06	1.26747e+06	1.29052e+06	1.29377e+06	1.2857e+06	1.26646e+06	1.35992e+06	1.27705e+06	1.39063e+06	1.25982e+06	1.32522e+06	1.30704e+06	0.992649	1.13486	1.018	0.968952	1.04046	0.977053	1.06395	0.963874	1.01391
C18390	597281	581295	575689	655725	617860	632548	689538	618179	693000	619092	653818	636455	585650	1.14039	1.02645	0.957664	1.17739	1.05554	1.1833	1.0571	1.1164	1.08675
C12448	220477	189692	178155	253222	324864	277937	263021	286613	268511	241529	265385	253457	201290	1.29523	1.66987	1.49476	1.30668	1.42388	1.33395	1.19991	1.31842	1.25916
C08278	964480	975555	968355	1.00687e+06	982156	1.00477e+06	951160	920675	963128	966437	986374	976405	959599	1.03434	0.949642	1.01409	0.991206	0.959437	1.00368	1.00713	1.0279	1.01751
C14430	1.07014e+06	1.549e+06	1.89573e+06	9.27102e+06	722480	3.56967e+06	3.65335e+06	1.8747e+07	922853	1.57506e+06	803001	1.18903e+06	1.27621e+06	2.05567	0.770526	0.719422	2.86266	14.6896	0.723121	1.23418	0.629209	0.931692
C06804	1.62689e+06	1.64199e+06	1.56313e+06	1.81124e+06	1.67555e+06	1.70057e+06	1.65202e+06	1.68252e+07	1.89041e+06	1.73176e+06	1.95233e+06	1.84204e+06	1.60825e+06	0.999144	1.06081	1.0253	1.02721	10.4618	1.17544	1.07679	1.21395	1.14537
C00118	2.61675e+06	743688	1.40611e+06	5.94257e+06	724644	735959	1.5272e+06	610940	6.79073e+06	6.83762e+06	6.19287e+06	6.51524e+06	1.75406e+06	0.449363	0.387926	0.424545	0.870666	0.348301	3.87144	3.89817	3.53059	3.71438
C04446	111045	102205	107102	107880	108307	110214	109658	108618	111627	105421	100535	102978	106508	1.07417	1.03917	1.00311	1.02958	1.01981	1.04806	0.989795	0.943923	0.966859
C00082	983279	979649	998592	1.03078e+06	934520	992847	1.12192e+06	922975	1.04095e+06	998310	1.09249e+06	1.0454e+06	994561	1.04231	0.952178	0.918489	1.12806	0.928023	1.04664	1.00377	1.09847	1.05112
C04070	214007	220022	208365	211108	212421	203161	208168	214726	203068	212098	203801	207950	211946	1.01116	0.986746	1.05596	0.982178	1.01312	0.958112	1.00072	0.961572	0.981146
C13877	263985	277362	294322	287090	291487	280257	287884	294192	290094	290675	288746	289711	279145	1.00474	1.03562	1.14521	1.03131	1.0539	1.03922	1.0413	1.03439	1.03785
C01252	369684	354504	370869	382892	361103	388110	402859	374377	353611	416454	393933	405194	364458	0.95516	0.979108	1.076	1.10537	1.02722	0.970239	1.14267	1.08088	1.11177
C03183	198902	188560	190286	209834	247883	217198	246467	327541	233439	203197	246781	224989	193808	1.12999	1.49613	1.16104	1.27171	1.69002	1.20448	1.04844	1.27332	1.16088
C00093	1.46844e+06	1.46097e+06	1.40134e+06	1.47872e+06	1.61276e+06	1.52908e+06	1.51315e+06	1.47193e+06	1.59119e+06	1.60421e+06	1.71559e+06	1.6599e+06	1.457e+06	1.00862	1.08468	1.04838	1.03853	1.01025	1.0921	1.10103	1.17748	1.13926
C04421	395124	463102	456837	587100	458994	476218	400935	1.41671e+06	386492	430221	423940	427081	433875	1.03689	1.05327	1.21024	0.924079	3.26525	0.890791	0.991579	0.977103	0.984341
C02937	2.58345e+06	774847	807442	2.84507e+06	2.80651e+06	2.89481e+06	2.96999e+06	2.63899e+06	3.02965e+06	2.82359e+06	2.94702e+06	2.8853e+06	1.6761e+06	1.80546	1.76079	1.53217	1.77197	1.57448	1.80756	1.68462	1.75826	1.72144
C01451	271468	265380	262834	284617	306934	271985	270762	294757	271510	270845	271108	270976	265813	1.04292	1.12802	1.13419	1.01862	1.10889	1.02143	1.01893	1.01992	1.01943
C07182	9.71176e+08	6.38373e+07	4.59176e+07	2.89196e+09	7.97379e+09	2.38417e+09	2.18164e+09	5.06811e+09	2.77365e+09	2.23081e+09	2.82434e+09	2.52758e+09	4.9477e+08	5.05822	16.5326	15.3707	4.4094	10.2434	5.60593	4.50879	5.70839	5.10859
C01591	6.07496e+09	3.34589e+08	3.22168e+08	2.59557e+08	2.28805e+08	7.00433e+09	2.40459e+08	1.95316e+08	2.83883e+08	5.27117e+09	3.11215e+08	2.79119e+09	2.84263e+09	0.0588911	0.0613604	0.0855182	0.0845903	0.0687098	0.0998662	1.85433	0.109481	0.981905
C10831	3.30299e+09	6.21248e+07	6.18754e+07	6.50153e+09	3.79722e+09	6.53881e+09	7.47082e+09	3.8166e+09	6.93089e+09	3.7965e+09	6.64367e+09	5.22008e+09	1.72494e+09	2.35109	2.38637	2.25072	4.33107	2.2126	4.01805	2.20095	3.85154	3.02625
C09916	6.04404e+06	487665	485077	4.47628e+07	5.47336e+06	2.38686e+07	1.68989e+07	582095	4.65125e+07	4.87624e+07	1.92422e+07	3.40023e+07	3.09086e+06	3.63806	0.212211	0.207448	5.46738	0.188328	15.0484	15.7763	6.22553	11.0009
C05332	2.47899e+09	2.5909e+09	2.57924e+09	2.2124e+09	2.27107e+09	2.35861e+09	2.42906e+09	2.36942e+09	2.42069e+09	2.33398e+09	2.34195e+09	2.33797e+09	2.53528e+09	0.879853	0.866801	0.887371	0.958104	0.934579	0.954804	0.920601	0.923746	0.922173
C17944	5.70341e+08	3.29263e+06	578964	1.17465e+09	588310	1.10629e+09	1.40405e+09	596469	1.22474e+09	7.61116e+08	5.9605e+09	3.36081e+09	6.44101e+08	6.54405	0.000954347	0.000935241	2.17986	0.000926049	1.90147	1.18167	9.25399	5.21783
C10387	226466	230542	207697	244289	253458	255848	264355	387833	268768	234628	287728	261178	222871	1.14605	1.45386	1.20375	1.18613	1.74017	1.20593	1.05275	1.291	1.17188
C10840	2.15076e+10	4.83481e+07	3.51632e+07	2.02539e+10	1.94968e+10	1.48603e+10	2.07544e+10	1.92106e+10	1.94851e+10	3.03001e+10	2.49625e+10	2.76313e+10	1.07723e+10	1.31026	2.2463	2.18716	1.92665	1.78334	1.80882	2.81279	2.31729	2.56504
C04483	1.04295e+10	1.16713e+06	806392	1.58701e+10	4.03411e+06	1.49337e+10	1.73592e+10	600342	1.8448e+10	1.61647e+10	1.93122e+10	1.77385e+10	5.17558e+09	2.99562	0.000343231	0.00107266	3.35406	0.000115995	3.56443	3.12327	3.73141	3.42734
C20651	2.60181e+10	3.56353e+10	3.59827e+10	2.31002e+10	2.58878e+10	2.34567e+10	2.20791e+10	2.85374e+10	2.21415e+10	2.35061e+10	2.06704e+10	2.20883e+10	3.10394e+10	0.745919	0.849648	0.867181	0.711325	0.919394	0.713335	0.7573	0.665941	0.711621
C00114	8.32771e+07	2.09013e+06	5.75948e+06	1.39937e+07	1.34118e+07	1.26432e+07	1.5448e+07	1.43764e+09	5.39897e+07	3.12617e+07	1.87824e+07	2.50221e+07	2.61241e+07	3.24724	0.576727	4.2692	0.591331	55.0311	2.06666	1.19666	0.718969	0.957814
C16562	4.97562e+08	8.98132e+06	7.74022e+06	7.35806e+08	8.56351e+06	7.08666e+08	1.37899e+10	5.67963e+06	8.41294e+08	7.01687e+08	7.94865e+08	7.48276e+08	2.65442e+08	43.712	0.0271514	0.0340161	51.9507	0.0213969	3.16941	2.64347	2.9945	2.81899
C01746	1.91204e+06	1.91791e+06	1.98337e+06	1.87249e+06	1.9058e+06	2.00014e+06	1.90683e+06	1.83849e+07	1.90597e+06	1.91033e+06	1.95395e+06	1.93214e+06	1.93892e+06	2.64943	0.943465	1.0043	0.98345	9.48206	0.983007	0.985256	1.00775	0.996505
C16521	1.77255e+06	1.73694e+06	1.66637e+06	1.74951e+06	1.73253e+06	1.81141e+06	1.76927e+06	2.22247e+07	1.72613e+06	1.73008e+06	1.76959e+06	1.74983e+06	1.71992e+06	2.98678	0.991125	1.0456	1.02869	12.9219	1.00361	1.00591	1.02888	1.01739
C00695	1.99836e+07	1.29904e+06	1.33699e+06	9.76341e+07	2.16553e+06	7.43406e+07	1.60631e+08	2.49522e+06	1.35592e+08	4.0523e+07	1.16171e+08	7.83472e+07	1.00053e+07	14.2736	0.499531	0.179197	16.0546	0.249391	13.5521	4.05017	11.611	7.83061
C01205	2.44323e+08	6.01981e+06	1.79902e+06	6.65509e+08	9.13958e+08	7.01842e+08	5.53347e+08	5.82987e+08	5.9152e+08	4.42771e+08	7.66606e+08	6.04688e+08	8.99502e+07	7.06076	11.2564	19.3126	6.1517	6.48122	6.57608	4.9224	8.52256	6.72248
C00341	1.99456e+06	2.12685e+06	2.1239e+06	2.0983e+06	2.00966e+06	2.14671e+06	1.85856e+06	1.82868e+06	1.94467e+06	1.85721e+06	1.9629e+06	1.91005e+06	2.01199e+06	1.08518	1.05794	1.11776	0.92374	0.90889	0.966543	0.923069	0.975599	0.949334
C00928	2.13517e+06	2.15109e+06	2.21481e+06	2.091e+06	2.1282e+06	2.23354e+06	2.12934e+06	2.01993e+06	2.12359e+06	2.13325e+06	2.15824e+06	2.14575e+06	2.16752e+06	1.02507	0.937501	0.99212	0.982387	0.931909	0.979734	0.984191	0.995721	0.989956
C08617	2.66059e+08	2.9789e+06	2.96795e+06	3.78952e+08	2.12237e+08	3.66682e+08	4.04986e+08	2.19073e+08	4.1879e+08	3.84691e+08	4.70987e+08	4.27839e+08	1.35077e+08	2.68633	1.61624	1.60089	2.99819	1.62184	3.10038	2.84794	3.48681	3.16737
C06771	1.12041e+06	1.06907e+06	1.08093e+06	1.11588e+06	1.09511e+06	1.14958e+06	1.11834e+06	2.35159e+06	1.06742e+06	1.08377e+06	1.11173e+06	1.09775e+06	1.0951e+06	1.0192	0.983924	1.038	1.02122	2.14739	0.974725	0.98966	1.01519	1.00243
C02735	866461	923926	922648	950246	873018	932553	807378	4.3415e+07	922614	805359	852704	829032	873818	14.986	1.0582	1.07287	0.923965	49.6843	1.05584	0.921655	0.975837	0.948746
C00396	6.53642e+06	2.10107e+06	1.24445e+07	5.75935e+06	3.58776e+06	2.94148e+06	4.47079e+06	3.96659e+06	5.90942e+06	2.59628e+06	3.61822e+06	3.10725e+06	6.68939e+06	0.762983	0.593161	0.663853	0.668341	0.592968	0.883403	0.388119	0.540889	0.464504
C12531	5.29706e+08	2.88024e+06	2.28163e+06	8.07039e+08	2.66668e+09	7.85697e+08	1.05627e+09	1.54321e+09	5.10363e+08	7.81243e+08	1.18956e+09	9.854e+08	1.66476e+08	0.555563	14.6149	11.5597	6.34487	9.2699	3.06569	4.69284	7.14554	5.91919
C08671	2.16854e+09	5.86202e+07	5.53863e+07	4.40815e+09	2.80824e+09	4.33098e+09	2.19334e+09	3.12331e+09	2.79356e+09	2.49884e+09	4.85385e+09	3.67635e+09	1.45803e+09	1.80514	1.89809	1.71673	1.50431	2.14215	1.91598	1.71385	3.32905	2.52145
C09281	2.11863e+07	2.24751e+06	2.14735e+07	2.07531e+07	8.14282e+06	1.40099e+07	1.25335e+07	1.29281e+07	1.19002e+07	7.41218e+06	9.84161e+06	8.62689e+06	1.24005e+07	1.72359	0.926954	0.946309	1.01073	1.04255	0.959658	0.597735	0.793649	0.695692
C09098	4.84623e+09	4.80924e+09	4.70902e+09	2.90239e+09	4.88007e+09	4.8387e+09	5.07944e+09	5.03894e+09	5.08925e+09	4.76935e+09	4.7041e+09	4.73672e+09	4.78879e+09	1.00671	1.00282	1.00247	1.06069	1.05224	1.06274	0.995941	0.982314	0.989128
C01770	4.03966e+07	681472	605353	7.39717e+07	2.00453e+08	7.17206e+07	7.57163e+07	1.27523e+08	7.48098e+07	6.16387e+07	8.48258e+07	7.32322e+07	1.92727e+07	4.15294	14.3426	13.3115	3.92867	6.61676	3.88164	3.19823	4.40134	3.79979
C02486	1.24159e+06	1.3579e+06	1.32211e+06	1.33712e+06	1.25099e+06	1.3363e+06	1.16114e+06	6.64733e+06	1.21554e+06	1.15404e+06	1.22188e+06	1.18796e+06	1.26063e+06	1.62375	1.05107	7.56115	0.921081	5.27304	0.964238	0.915447	0.969264	0.942356
C06575	1.14134e+07	1.48749e+07	1.31151e+07	1.14858e+07	8.49625e+06	1.31217e+07	9.47989e+06	1.14402e+07	1.09518e+07	2.12652e+06	1.00604e+07	6.09344e+06	1.23271e+07	0.886576	0.710999	0.842367	0.76903	0.928053	0.888435	0.172508	0.81612	0.494314
C11721	2.8156e+06	2.42848e+06	2.40464e+06	2.74407e+06	2.52878e+06	3.10715e+06	2.59565e+06	2.51946e+06	2.48319e+06	3.24015e+06	3.9355e+06	3.58782e+06	2.64353e+06	0.997202	0.91769	0.940625	0.981889	0.953068	0.939346	1.22569	1.48873	1.35721
C00407	543939	501119	406891	598597	603717	590388	482582	1.02139e+07	510418	516735	543466	530101	498673	14.7973	1.27203	40.7536	0.967732	20.4822	1.02355	1.03622	1.08982	1.06302
C02223	2.07796e+07	6.0207e+06	1.58864e+07	644432	670585	599281	611985	668935	636437	636082	626146	631114	1.15045e+07	0.0564724	0.0564992	0.0563067	0.0531953	0.0581456	0.0553207	0.0552899	0.0544262	0.054858
C00366	724078	747812	821452	801917	787391	792026	777658	794697	772406	785196	779987	782592	758172	1.03206	1.02999	1.13898	1.0257	1.04818	1.01877	1.03564	1.02877	1.03221
C14279	1.06656e+09	9.33597e+08	7.61318e+08	2.49129e+08	1.02777e+08	3.20321e+08	2.03653e+08	1.94955e+08	2.00318e+08	3.2919e+08	2.15596e+08	2.72393e+08	9.9011e+08	4.05946	0.055614	0.136317	0.205687	0.196903	0.202319	0.332478	0.21775	0.275114
C00601	2.76052e+08	9.30478e+07	8.68378e+07	8.32263e+07	3.46087e+08	3.84785e+08	4.26898e+08	5.45391e+07	4.17338e+08	3.45106e+08	4.29773e+08	3.87439e+08	1.81488e+08	2.01418	0.731368	0.845591	2.35221	0.300511	2.29954	1.90154	2.36805	2.13479
C03840	3.14903e+09	3.78321e+09	3.64041e+09	2.97211e+09	1.65915e+09	3.04406e+09	2.47486e+09	1.82406e+09	2.5021e+09	2.77932e+09	2.52179e+09	2.65055e+09	3.46717e+09	0.871658	0.418725	0.62867	0.713799	0.526095	0.721656	0.80161	0.727334	0.764472
C00922	4.24899e+07	3.67431e+07	3.63571e+07	2.82094e+07	3.90679e+07	3.7534e+07	3.73363e+07	4.13706e+07	3.56548e+07	4.62537e+07	3.9509e+07	4.28814e+07	3.87665e+07	2.31204	1.00732	0.849899	0.963107	1.06717	0.919732	1.19314	1.01915	1.10614
C01993	2.21565e+06	1.44622e+06	1.39224e+06	3.83583e+07	1.20208e+06	1.39232e+06	1.23666e+06	1.15014e+06	1.2946e+06	1.18286e+06	1.26183e+06	1.22234e+06	1.55123e+06	131.782	6.64048	310.269	0.797214	0.741439	0.834567	0.762528	0.813441	0.787984
C11318	1.65584e+07	621356	630580	4.44644e+07	1.27705e+09	9.08642e+06	8.43629e+07	3.95027e+08	7.81185e+07	6.38285e+06	5.05201e+07	2.84515e+07	6.4663e+06	2.14181	217.473	172.382	13.0465	61.09	12.0809	0.987095	7.81282	4.39996
C05464	1.11951e+06	1.05773e+06	1.07582e+06	1.15067e+06	1.10371e+06	1.17721e+06	1.17972e+06	1.07102e+06	1.18068e+06	1.11878e+06	1.14382e+06	1.1313e+06	1.0892e+06	1.07335	1.00708	0.972647	1.0831	0.983303	1.08398	1.02715	1.05015	1.03865
C14774	2.09504e+09	3.07153e+08	3.03058e+08	2.73786e+09	1.86368e+09	2.74365e+09	1.51159e+09	2.17521e+09	2.95e+09	2.5684e+09	2.94908e+09	2.75874e+09	1.19952e+09	2.1764	1.52549	1.61455	1.26016	1.81339	2.45931	2.14118	2.45854	2.29986
C02787	1.06634e+08	1.1497e+08	1.14651e+08	9.46468e+07	9.44957e+07	9.80729e+07	1.04883e+08	1.02271e+08	1.01694e+08	1.01098e+08	9.80456e+07	9.9572e+07	1.11567e+08	0.862315	0.788461	0.85214	0.940088	0.916672	0.911501	0.906164	0.878802	0.892483
C10820	2.10337e+09	1.29701e+07	1.32441e+07	2.37986e+09	8.62412e+07	2.46612e+09	2.61996e+09	2.03872e+09	2.59973e+09	2.41465e+09	2.47651e+09	2.44558e+09	1.0831e+09	2.19671	0.0851091	1.6499	2.41895	1.88231	2.40028	2.2294	2.28651	2.25796
C00810	1.04642e+07	1.12196e+07	5.87541e+07	7.37691e+07	9.42842e+07	8.04859e+07	7.06551e+07	7.88363e+07	7.77884e+07	6.75696e+07	7.46071e+07	7.10883e+07	3.46469e+07	2.25118	2.51492	2.27176	2.03929	2.27542	2.24518	1.95023	2.15335	2.05179
C08175	4.79733e+08	5.98158e+07	6.05212e+07	1.10612e+09	1.73478e+09	9.73579e+08	1.34651e+09	1.31539e+09	1.2255e+09	7.79356e+08	2.90082e+08	5.34719e+08	2.75176e+08	3.10393	6.81514	4.91453	4.89327	4.78018	4.45351	2.83221	1.05417	1.94319
C11714	2.51002e+07	985428	1.6597e+06	5.55798e+08	1.38534e+09	5.70938e+08	5.56012e+08	7.0831e+08	6.39079e+08	3.3111e+08	6.44291e+08	4.87701e+08	4.67373e+07	13.4354	46.4613	29.7665	11.8965	15.1551	13.6739	7.08449	13.7854	10.4349
C00148	2.31509e+06	2.34147e+06	2.40144e+06	4.47706e+06	4.48887e+06	7.08388e+06	2.36062e+06	9.66165e+06	5.13073e+06	2.69e+06	2.10346e+06	2.39673e+06	2.35244e+06	1.02408	1.58001	2.74147	1.00347	4.10707	2.18102	1.14349	0.894159	1.01883
C03943	685909	710823	679662	1.0161e+06	689059	630492	636248	4.10805e+06	2.17032e+06	1.18019e+06	564740	872463	694400	1.34575	1.07133	4.038	0.916256	5.91598	3.12546	1.69958	0.813278	1.25643
C20517	3.33964e+08	1.65381e+06	1.71125e+06	1.09706e+09	1.84472e+09	1.09968e+09	5.79798e+08	1.45765e+09	1.32635e+09	5.30157e+08	1.44826e+09	9.89209e+08	1.74489e+08	6.21332	10.1752	8.35015	3.32283	8.35383	7.60133	3.03834	8.3	5.66917
C04033	1.47894e+09	1.26404e+09	1.28036e+09	1.63966e+09	2.15038e+09	1.5643e+09	1.52188e+09	1.96291e+09	1.48391e+09	1.7309e+09	1.77973e+09	1.75531e+09	1.37216e+09	1.21115	1.63898	1.56353	1.10912	1.43053	1.08144	1.26144	1.29703	1.27924
C10736	2.0397e+09	1.98748e+09	1.99224e+09	2.11843e+09	2.05235e+09	6.1076e+08	2.04165e+09	2.11635e+09	2.03188e+09	2.25387e+09	2.27572e+09	2.2648e+09	2.00994e+09	1.0332	1.00851	1.00923	1.01578	1.05294	1.01091	1.12136	1.13223	1.1268
C10462	1.36046e+08	6.97888e+07	6.34085e+07	1.36711e+08	2.01882e+08	1.42116e+08	1.60036e+08	7.01822e+07	6.62844e+07	1.39096e+08	6.29797e+07	1.01038e+08	9.76812e+07	1.48626	2.09207	1.85252	1.63835	0.718483	0.678579	1.42398	0.644748	1.03437
C19266	1.92478e+06	180108	182027	2.32867e+06	5.47244e+06	2.61465e+06	2.89567e+06	3.40066e+06	3.40907e+06	2.25861e+06	3.42391e+06	2.84126e+06	1.0353e+06	2.61611	4.0611	3.62278	2.79694	3.28471	3.29283	2.1816	3.30716	2.74438
C02366	8.5684e+06	1.25653e+06	1.07769e+06	4.15427e+07	7.48988e+07	9.56873e+06	4.67274e+07	5.9845e+07	6.89372e+07	2.63806e+07	5.37438e+07	4.00622e+07	5.37776e+06	2.07402	13.5538	3.89029	8.68901	11.1282	12.8189	4.9055	9.99371	7.4496
C17005	1.44828e+08	3.69503e+07	4.41741e+07	2.47196e+08	1.507e+09	2.30823e+08	2.85392e+08	5.72804e+08	2.57915e+08	1.87368e+08	2.50732e+08	2.1905e+08	9.5928e+07	2.26935	19.6303	13.2749	2.97507	5.97119	2.68863	1.95322	2.61375	2.28348
C05513	858184	9.16749e+06	3.15967e+06	1.05978e+06	1.03943e+06	746049	623620	826394	637815	609845	721930	665887	3.43205e+06	37.0838	0.272153	23.075	0.181705	0.240787	0.185841	0.177691	0.210349	0.19402
C13698	814258	9.16749e+06	3.15967e+06	1.05978e+06	687671	493573	395005	514813	378647	403463	406041	404752	3.37693e+06	37.6892	0.183779	23.4517	0.116972	0.15245	0.112128	0.119476	0.12024	0.119858
C08456	1.88854e+09	1.86567e+09	1.82303e+09	1.8814e+09	1.85082e+09	1.86931e+09	1.87687e+09	1.88159e+09	1.89465e+09	1.82749e+09	1.82957e+09	1.82853e+09	1.85685e+09	1.0102	1.00554	1.0054	1.01078	1.01333	1.02036	0.984189	0.985308	0.984748
C17359	257535	189012	1.32661e+06	297117	359435	294996	226072	298108	228186	1.42723e+06	260530	843880	502046	1.90699	0.73298	3.88336	0.450302	0.593788	0.454512	2.84283	0.518937	1.68088
C00525	507045	588016	582055	554160	572958	570894	502822	483056	489927	488051	500630	494341	553491	1.0786	0.972035	1.06379	0.908457	0.872744	0.885159	0.881769	0.904497	0.893133
C07369	1.03163e+08	5.7994e+06	4.5678e+06	2.05022e+08	1.47456e+09	4.35995e+07	2.65417e+08	1.10139e+09	2.58737e+08	4.29143e+07	2.59126e+07	3.44134e+07	5.49344e+07	4.01119	30.8209	23.199	4.83153	20.0492	4.70993	0.781191	0.471701	0.626446
C11301	3.8423e+07	703192	629717	5.21293e+07	1.27578e+09	4.05842e+07	7.94495e+07	1.1587e+08	3.48802e+07	1.23043e+07	5.05201e+07	3.14122e+07	2.35122e+07	0.978243	59.8093	47.4083	3.37908	4.92809	1.4835	0.523315	2.14868	1.336
C03982	518462	621052	1.64609e+06	571521	1.57403e+06	597906	531061	3.53246e+06	555944	507955	541871	524913	818344	0.725483	6.89148	3.98155	0.648947	4.31659	0.679352	0.620711	0.662155	0.641433
C00295	509861	805163	435833	283770	338171	286598	411540	350657	284178	245997	284858	265428	595352	0.452977	0.555865	4.3136	0.691256	0.588992	0.477328	0.413197	0.478471	0.445834
C15850	7.03228e+07	2.70677e+06	2.66652e+06	1.49448e+08	1.37529e+09	1.39144e+08	2.28605e+08	4.81079e+08	2.05874e+08	1.34928e+08	2.04728e+08	1.69828e+08	3.84388e+07	4.46032	36.8634	30.3348	5.94724	12.5154	5.35589	3.5102	5.32608	4.41814
C03002	4.80115e+06	123695	129876	122613	121093	122494	122388	124466	120527	119098	114843	116970	2.95594e+06	0.0411493	0.0400507	0.0417779	0.041404	0.042107	0.0407746	0.040291	0.0388516	0.0395713
C21793	1.05767e+08	3.77445e+07	3.73566e+07	1.35531e+08	1.32781e+08	1.38081e+08	1.57263e+08	1.26179e+07	1.52549e+08	1.33481e+08	1.6282e+08	1.48151e+08	7.17219e+07	1.94663	0.193285	0.182055	2.19268	0.175928	2.12696	1.86109	2.27016	2.06563
C08306	2.52977e+08	2.76301e+08	2.77724e+08	2.21268e+08	2.23332e+08	2.34791e+08	2.44934e+08	2.38234e+08	2.4329e+08	2.38699e+08	2.38498e+08	2.38599e+08	2.66134e+08	0.838236	0.809849	0.82885	0.920341	0.895165	0.914162	0.896912	0.896157	0.896534
C04687	399600	352994	358267	472293	590437	499743	475206	492128	455303	405187	458611	431899	372894	1.18392	1.44509	1.47642	1.27437	1.31975	1.221	1.0866	1.22987	1.15824
C00837	7.25483e+06	640453	657279	8.91303e+06	1.30395e+09	1.32576e+07	2.38071e+07	2.98314e+08	2.19324e+07	2.23283e+07	3.45642e+07	2.84462e+07	5.68936e+06	2.78762	247.926	178.335	4.18449	52.4337	3.85498	3.92457	6.07523	4.9999
C19205	1.43716e+09	1.46553e+09	1.47259e+09	1.38059e+09	1.43049e+09	1.42692e+09	1.45836e+09	1.44825e+09	1.44451e+09	1.40841e+09	1.42179e+09	1.4151e+09	1.45241e+09	0.973719	0.966917	0.974344	1.0041	0.99714	0.994563	0.969708	0.978918	0.974313
C07973	5.87553e+06	1.78531e+06	1.79026e+06	7.04416e+06	5.29895e+06	6.86755e+06	7.35094e+06	7.29477e+06	5.41993e+06	6.87133e+06	5.79098e+06	6.33116e+06	4.01758e+06	1.74757	2.05674	1.94018	1.82969	1.81571	1.34905	1.71031	1.44141	1.57586
C06869	478817	485723	466512	514687	729159	567317	599577	817117	566261	522763	606207	564485	479583	1.2607	1.63387	1.50365	1.2502	1.70381	1.18074	1.09004	1.26403	1.17703
C08257	1.16533e+06	1.17643e+06	1.16257e+06	1.16675e+06	1.13885e+06	1.17915e+06	1.12744e+06	1.13825e+06	1.1341e+06	1.12617e+06	1.14617e+06	1.13617e+06	1.16196e+06	0.955461	0.961209	0.980712	0.970289	0.979591	0.976022	0.969193	0.986409	0.977801
C11118	677322	811348	781061	798931	674384	781109	693783	645244	726289	663597	707904	685750	728838	1.06417	1.03703	1.15273	0.951903	0.885305	0.996503	0.910487	0.971278	0.940882
C08848	4.95411e+08	4.11367e+06	2.03815e+06	6.92836e+08	2.36054e+07	7.3014e+08	9.08738e+08	1.17069e+07	8.14478e+08	6.14312e+08	1.36454e+09	9.89427e+08	1.91527e+08	4.00712	0.083102	0.121382	4.74469	0.0611237	4.25254	3.20744	7.12452	5.16598
C06559	3.17924e+06	3.26018e+06	3.22548e+06	3.5738e+06	3.47767e+06	3.48136e+06	3.32141e+06	3.55192e+06	3.36429e+06	3.4267e+06	3.40703e+06	3.41687e+06	3.1985e+06	1.06679	1.10794	1.08368	1.03843	1.1105	1.05183	1.07135	1.0652	1.06827
C07254	2.75655e+07	6.74123e+07	7.88384e+07	2.25545e+07	1.63117e+07	1.4339e+07	2.29346e+07	3.02998e+07	3.3586e+07	3.62407e+07	2.85992e+07	3.24199e+07	4.98151e+07	0.499769	0.203711	0.31093	0.460394	0.608245	0.674214	0.727504	0.574107	0.650806
C01079	4.25575e+06	1.17559e+06	1.64201e+06	2.1083e+07	1.1603e+09	1.77651e+08	3.56775e+07	8.65751e+08	1.56892e+07	2.08665e+08	2.62918e+08	2.35792e+08	3.43931e+06	3.08947	336.591	268.875	10.3735	251.722	4.56173	60.6706	76.445	68.5578
C12216	660416	650819	635080	702741	635809	665101	705972	642659	751177	656256	719848	688052	646603	1.02948	0.912454	0.947243	1.09182	0.9939	1.16173	1.01493	1.11328	1.0641
C15823	992118	1.06534e+06	1.0174e+06	6.22466e+06	968774	5.22092e+06	1.10429e+07	952305	7.59776e+06	4.55805e+06	1.38141e+07	9.18609e+06	1.1999e+06	4.95517	0.899598	0.814822	9.20321	0.793656	6.33201	3.79871	11.5128	7.65573
C04308	4.68701e+07	4.77206e+07	4.74168e+07	1.05912e+09	2.89013e+08	1.30965e+09	1.10482e+09	1.81631e+08	1.0966e+09	4.64668e+07	8.87201e+08	4.66834e+08	4.71026e+07	26.0951	2.0806	2.21835	23.4556	3.85608	23.281	0.986502	18.8355	9.91099
C08582	8.22781e+08	2.52442e+06	2.4892e+06	9.92834e+08	2.52138e+06	9.6401e+08	9.70322e+08	2.39967e+06	1.08229e+09	1.10296e+09	1.10427e+09	1.10361e+09	4.05009e+08	2.09276	0.00598925	0.00638702	2.3958	0.00592497	2.67227	2.72329	2.72652	2.7249
C04544	435118	450235	477766	466026	473164	475768	467315	477555	459427	471845	468715	470280	454779	1.37798	1.03187	1.31959	1.02757	1.05008	1.01022	1.03753	1.03064	1.03408
C14190	1.22152e+09	1.24427e+09	1.24041e+09	1.26436e+09	1.23087e+09	1.26115e+09	1.22849e+09	1.19815e+09	1.21667e+09	1.23145e+09	1.22256e+09	1.227e+09	1.23218e+09	1.02646	0.983109	0.988394	0.997004	0.972378	0.987409	0.999406	0.992187	0.995797
C11991	9.40239e+06	3.12474e+06	3.09406e+06	1.35199e+07	3.25379e+06	1.18194e+07	1.25289e+07	3.2418e+06	1.48103e+07	1.10186e+07	1.18875e+07	1.14531e+07	6.24983e+06	2.18912	0.501033	0.51665	2.00468	0.518702	2.36971	1.76303	1.90206	1.83254
C15604	450967	2.51397e+06	753262	2.79571e+06	5.40424e+06	6.01092e+06	2.69494e+06	1.61629e+07	3.09581e+06	2.67521e+06	822074	1.74864e+06	1.04136e+06	1.81237	21.2499	29.2551	2.5879	15.521	2.97285	2.56896	0.789424	1.67919
C11604	1.39155e+08	1.3708e+08	1.34055e+08	1.7411e+08	1.56327e+08	1.64214e+08	1.48876e+08	1.40065e+08	1.43032e+08	1.48187e+08	1.52808e+08	1.50498e+08	1.35589e+08	1.2881	1.23638	1.19868	1.09799	1.03302	1.0549	1.09291	1.127	1.10996
C03912	2.1279e+07	2.78929e+07	2.51373e+07	2.96776e+07	3.55683e+07	3.4201e+07	2.34528e+07	2.62227e+07	2.69575e+07	2.53447e+07	2.31842e+07	2.42644e+07	2.32934e+07	1.28121	1.28339	1.53635	1.00684	1.12576	1.1573	1.08806	0.995309	1.04169
C08234	4.90121e+06	5.23755e+06	5.00284e+06	5.24583e+06	4.81385e+06	4.88743e+06	4.83035e+06	4.72399e+06	5.12549e+06	4.98249e+06	4.7986e+06	4.89054e+06	4.9983e+06	1.01788	0.927178	0.931323	0.966399	0.945118	1.02545	0.996836	0.960046	0.978441
C06145	6.3608e+06	2.47066e+06	2.55847e+06	1.019e+07	6.4622e+06	2.80919e+06	2.43602e+06	1.53583e+06	6.93154e+06	1.84423e+06	1.06192e+07	6.23171e+06	3.5876e+06	0.636688	7.00363	3.41679	0.679012	0.428095	1.93209	0.514057	2.95997	1.73701
C02659	6.82022e+06	2.89088e+06	3.20729e+06	1.14175e+07	6.4622e+06	2.80919e+06	2.43602e+06	1.53583e+06	6.93154e+06	1.84423e+06	1.15988e+07	6.72153e+06	3.96971e+06	0.575402	6.32948	3.08789	0.613652	0.386888	1.74611	0.464575	2.92183	1.6932
C00135	355317	342650	339080	397608	529982	412569	397727	378323	391696	397387	383407	390397	348264	4.10441	1.45681	1.21335	1.14203	1.08631	1.12471	1.14105	1.10091	1.12098
C19284	2.56134e+06	5.55814e+06	2.41413e+06	1.58319e+06	729596	475201	1.76367e+06	1.93511e+06	998953	1.15541e+06	1.35533e+06	1.25537e+06	3.65479e+06	0.148134	0.212219	0.25389	0.482564	0.529473	0.273327	0.316135	0.370836	0.343485
C03837	279444	264915	267339	294803	408273	305149	346271	460173	327967	285478	346711	316095	272288	1.12999	1.49613	1.16104	1.27171	1.69002	1.20448	1.04844	1.27332	1.16088
C01921	862042	850516	862628	899383	810847	890652	866492	862118	894798	859436	895225	877331	855831	1.06143	1.01309	0.965895	1.01246	1.00735	1.04553	1.00421	1.04603	1.02512
C18499	307419	312952	281941	331613	384473	347304	382277	526469	364842	318498	390579	354539	302539	1.14605	1.45386	1.20375	1.26356	1.74017	1.20593	1.05275	1.291	1.17188
C18463	8.11699e+07	1.11108e+08	1.16493e+08	8.32802e+07	1.92728e+06	8.21724e+07	7.49921e+07	1.79693e+06	7.67046e+07	8.74406e+07	7.30967e+07	8.02686e+07	1.01801e+08	0.793565	0.0198919	0.0205114	0.736657	0.0176514	0.75348	0.858941	0.718038	0.788489
C14322	5.77481e+08	5.84005e+08	8.09829e+08	4.89177e+08	6.43457e+08	6.42926e+08	6.10405e+08	6.02206e+08	6.12951e+08	6.3016e+08	9.88546e+08	8.09353e+08	7.05211e+08	0.918297	1.26565	0.897151	0.865563	0.853937	0.869175	0.893577	1.40177	1.14768
HMDB0013659	1.17564e+08	2.0774e+08	1.2087e+08	1.41038e+08	1.42404e+08	2.05242e+08	1.22936e+08	1.50012e+08	1.61477e+08	1.05543e+08	1.12646e+08	1.09094e+08	1.37231e+08	1.1303	0.844292	1.37388	0.895837	1.09314	1.17669	0.76909	0.820851	0.794971
C12244	2.03523e+07	3.44579e+07	8.66695e+07	2.74328e+07	1.32819e+07	3.65377e+07	2.63441e+07	8.55035e+08	5.72548e+07	3.67076e+07	4.06279e+07	3.86677e+07	3.9828e+07	0.942625	1.2694	2.48589	0.661447	21.4682	1.43755	0.921653	1.02008	0.970869
C06178	3.50346e+06	3.54339e+06	3.63415e+06	3.35809e+06	3.49203e+06	3.65932e+06	3.4939e+06	3.31438e+06	3.40964e+06	3.42935e+06	3.30018e+06	3.36477e+06	3.56e+06	1.02408	0.914631	1.75333	0.981435	0.931006	0.957764	0.963302	0.927018	0.94516
C05465	460150	383399	406200	540325	527882	511855	564901	462007	608983	507151	637484	572318	421387	1.20057	1.06593	1.1802	1.34058	1.0964	1.44519	1.20353	1.51282	1.35818
C05468	2.86158e+06	2.25911e+06	2.2053e+06	2.98794e+06	3.93547e+06	3.07559e+06	3.20551e+06	3.40522e+06	3.18477e+06	2.88767e+06	3.30886e+06	3.09827e+06	2.50881e+06	1.21388	1.37282	1.3848	1.2777	1.3573	1.26944	1.15101	1.3189	1.23495
C02455	1.23092e+08	2.45481e+08	2.42395e+08	1.16182e+08	1.04572e+08	1.17556e+08	1.14411e+08	1.0565e+08	1.1634e+08	1.06683e+08	1.05836e+08	1.0626e+08	1.84131e+08	0.628385	0.504073	0.534435	0.621356	0.573779	0.631832	0.579389	0.574788	0.577088
C07113	9.67083e+07	7.81684e+06	7.78214e+06	1.50874e+08	6.24205e+06	1.50541e+08	1.99405e+08	5.69221e+06	7.34374e+06	1.5662e+08	3.63554e+07	9.64879e+07	5.43787e+07	2.86095	0.100418	0.121752	3.66697	0.104677	0.135048	2.88018	0.668559	1.77437
C17702	2.16138e+07	175514	1.07849e+06	2.79711e+07	162379	9.08279e+08	1.18243e+08	143706	4.34608e+08	2.28756e+07	8.42139e+08	4.32507e+08	1.17747e+07	74.5325	0.0130913	0.0133925	10.0421	0.0122046	36.9104	1.94278	71.521	36.7319
C08570	482297	176665	162029	204158	211742	200275	214652	210734	223364	9.09743e+07	5.91163e+07	7.50453e+07	2.2962e+06	0.0909247	0.091289	0.0930028	0.0934814	0.0917753	0.0972758	39.6196	25.7453	32.6825
C00550	9.3686e+06	3.22344e+06	3.15435e+06	8.75703e+06	1.07181e+07	9.50036e+06	1.0108e+07	1.04452e+07	9.13891e+06	9.10005e+06	9.29459e+06	9.19732e+06	6.14899e+06	1.41292	1.69386	1.73868	1.64385	1.69869	1.48625	1.47993	1.51156	1.49575
C18846	758527	761881	700780	816130	698872	798045	860512	734704	775091	751099	828909	790004	738556	1.08049	0.961105	0.995504	1.16513	0.994784	1.04947	1.01698	1.12234	1.06966
C15668	1.1589e+07	907251	1.67234e+07	1.22304e+06	1.71738e+06	1.35043e+06	1.3333e+06	1.40881e+06	1.07953e+07	1.18368e+06	1.30867e+06	1.24617e+06	7.56634e+06	0.16668	0.218996	0.20477	0.176214	0.186194	1.42676	0.15644	0.17296	0.1647
C18282	8.4739e+08	8.6267e+08	8.53271e+08	5.95957e+08	6.80636e+08	7.01202e+08	8.2161e+08	8.15447e+08	8.40833e+08	7.79904e+08	8.11707e+08	7.95805e+08	8.56942e+08	0.725564	0.739441	0.769327	0.95877	0.951579	0.981202	0.910101	0.947214	0.928658
C13309	5.27338e+06	2.41495e+06	2.5154e+06	6.32807e+06	1.32448e+07	6.30733e+06	6.67772e+06	7.38179e+06	6.66614e+06	5.85812e+06	6.34194e+06	6.10003e+06	3.90518e+06	1.56592	4.12637	3.08083	1.70997	1.89026	1.707	1.50009	1.62398	1.56204
C12256	4.85254e+06	5.3071e+06	5.16721e+06	5.22589e+06	5.60096e+06	5.22268e+06	4.5381e+06	4.88051e+06	4.75073e+06	4.51836e+06	4.77549e+06	4.64693e+06	4.99931e+06	1.06252	1.18445	1.1045	0.907746	0.976237	0.950277	0.903798	0.955231	0.929515
C00954	1.02778e+08	1.0465e+08	1.09708e+08	9.43696e+07	7.42034e+07	9.25066e+07	8.30414e+07	8.70569e+08	9.69474e+07	1.008e+08	9.81394e+07	9.94699e+07	1.07095e+08	0.853623	0.647953	0.673667	0.775396	8.12891	0.905243	0.94122	0.916373	0.928797
C00475	124033	115973	116430	119378	113045	115055	114294	334869	112282	108378	113313	110845	118126	1.00862	0.977559	0.990856	0.967556	2.83483	0.950524	0.917471	0.959254	0.938363
C10172	540838	427797	385647	567375	689951	581189	471815	713996	481820	482207	534608	508407	470929	1.37658	1.75339	2.11243	1.00188	1.51614	1.02313	1.02395	1.13522	1.07958
C20316	2.66676e+08	2.40153e+08	2.39725e+08	2.91013e+08	3.2732e+08	2.87229e+08	2.8843e+08	2.64772e+08	2.87516e+08	2.97974e+08	2.74822e+08	2.86398e+08	2.48957e+08	1.28507	1.21268	1.02647	1.15856	1.06353	1.15488	1.19689	1.1039	1.15039
C16536	359292	441947	980093	298337	515110	340030	392813	438625	480696	376218	498644	437431	521278	0.609218	0.735927	0.732547	0.753557	0.841443	0.92215	0.721723	0.956581	0.839152
C09211	1.52301e+08	7.5912e+08	7.77084e+08	1.059e+08	7.45304e+06	1.09815e+08	1.09541e+08	2.14265e+06	9.1217e+07	1.36421e+08	9.49072e+07	1.15664e+08	4.58371e+08	0.24551	0.00384236	0.00386621	0.238978	0.0046745	0.199003	0.297621	0.207053	0.252337
C19907	257701	250593	1.96585e+06	121275	172412	277203	411614	295438	298003	131521	98718.3	115120	776721	0.710235	0.287188	1.95548	0.529938	0.380366	0.383668	0.169329	0.127096	0.148212
C11134	3.00079e+08	2.5793e+06	1.81411e+06	3.67968e+08	8.51257e+07	4.03412e+08	4.78786e+08	7.22059e+07	4.20657e+08	6.01195e+08	7.9223e+08	6.96712e+08	1.48594e+08	2.594	0.547849	0.48478	3.22211	0.485927	2.83091	4.04588	5.3315	4.68869
C10280	627971	651483	617311	641010	589038	662394	692352	582358	706927	647185	709938	678562	638688	1.034	1.03352	0.936121	1.08402	0.911804	1.10684	1.0133	1.11156	1.06243
C19526	4.90817e+06	360213	338753	1.60318e+08	2.64072e+08	1.42549e+08	8.81803e+07	1.23577e+08	1.5588e+08	8.7708e+07	1.06269e+08	9.69885e+07	1.68249e+06	78.7506	200.138	157.948	52.4105	73.4488	92.648	52.1298	63.1616	57.6457
C02571	384622	354344	287715	423271	426891	417467	341237	390995	360919	365386	384288	374837	352615	1.20736	1.27203	1.80179	0.967732	1.10884	1.02355	1.03622	1.08982	1.06302
C11092	2.76939e+08	1.90656e+07	1.98909e+07	3.86601e+08	2.19907e+06	3.56414e+08	6.41158e+07	2.00704e+06	5.96197e+08	5.36323e+08	7.60895e+08	6.48609e+08	1.45366e+08	0.399903	0.0148241	0.014328	0.441063	0.0138068	4.10134	3.68946	5.23432	4.46189
C14387	3.21583e+07	1.89581e+06	1.82584e+06	6.58727e+07	6.85201e+08	5.75486e+07	9.35588e+07	2.72488e+08	8.31074e+07	6.01454e+07	8.66888e+07	7.34171e+07	1.84126e+07	4.00091	36.0226	30.3115	5.08124	14.799	4.51361	3.26654	4.70812	3.98733
HMDB0032024	1.43639e+06	1.48785e+06	1.37075e+06	4.80457e+06	1.57756e+06	3.16114e+06	8.51649e+06	1.43981e+06	7.28127e+06	2.41445e+06	1.04723e+07	6.44337e+06	1.43989e+06	4.88534	1.07362	1.03769	5.91467	0.999939	5.05681	1.67683	7.27296	4.47489
C00499	2.4684e+06	2.41881e+06	2.38143e+06	2.45843e+06	2.41267e+06	2.53266e+06	2.46383e+06	7.32694e+08	3.68059e+06	2.40925e+06	2.46427e+06	2.43676e+06	2.42957e+06	1.01647	1.46024	1.03077	1.0141	301.574	1.51492	0.991638	1.01428	1.00296
C07241	938173	743426	756844	3.42879e+07	758874	3.06919e+07	1.54413e+06	720737	4.90372e+06	1.52415e+06	5.79918e+06	3.66167e+06	830014	1.07803	0.877185	0.885172	1.86037	0.868343	5.908	1.8363	6.98685	4.41157
C05328	2.25089e+06	1.96275e+06	1.9267e+06	2.57028e+06	3.20374e+06	2.68753e+06	2.59775e+06	2.82331e+06	2.72851e+06	2.24324e+06	2.59192e+06	2.41758e+06	2.06126e+06	1.26746	1.52044	1.47413	1.26027	1.3697	1.32371	1.08828	1.25744	1.17286
C02837	1.09517e+06	1.59102e+06	1.52988e+06	1.37728e+06	1.11508e+06	1.20657e+06	1.43241e+06	1.07873e+06	1.14976e+06	1.35057e+06	1.17871e+06	1.26464e+06	1.33742e+06	0.883232	0.825104	1.49279	1.07103	0.80658	0.859686	1.00983	0.881329	0.945582
C17168	724613	658562	563485	730129	883722	742804	751155	764466	794802	707518	781454	744486	661149	1.35384	1.16629	1.38468	1.13613	1.15627	1.20215	1.07013	1.18196	1.12605
C06878	1.40826e+06	1.45205e+06	1.45516e+06	1.37581e+06	1.40759e+06	1.28795e+06	1.16639e+06	1.24774e+06	1.22556e+06	1.2718e+06	1.1615e+06	1.21665e+06	1.43697e+06	0.920761	0.928561	1.03527	0.811704	0.868315	0.852877	0.885059	0.808296	0.846677
C00261	4.16344e+06	4.09691e+06	4.10123e+06	4.29503e+06	4.33211e+06	4.42712e+06	4.28016e+06	4.0669e+06	4.26048e+06	4.20343e+06	4.24503e+06	4.22423e+06	4.14656e+06	1.0231	1.01888	1.04108	1.03222	0.980789	1.02748	1.01372	1.02375	1.01873
C10636	3.37773e+06	3.45639e+06	3.4638e+06	3.27492e+06	3.40629e+06	3.35015e+06	2.98478e+06	2.97007e+06	2.98788e+06	3.19533e+06	3.00714e+06	3.10123e+06	3.42689e+06	0.98638	0.926829	1.03334	0.870988	0.866695	0.871892	0.932428	0.877513	0.904971
C08357	8.94192e+07	338484	328071	7.46966e+07	1.11946e+08	1.32073e+08	1.86454e+07	2.74306e+08	1.57872e+08	1.34861e+07	1.96779e+08	1.05133e+08	4.26036e+07	0.255295	2.66485	1.98284	0.437649	6.43856	3.70561	0.316548	4.61884	2.46769
C01234	3.51685e+06	3.55693e+06	3.64803e+06	3.37091e+06	3.50537e+06	3.6733e+06	3.2571e+06	3.79947e+06	3.31482e+06	3.44245e+06	3.24614e+06	3.3443e+06	3.57359e+06	1.02408	0.914631	1.01974	0.911437	1.06321	0.927588	0.963302	0.908369	0.935835
C01620	3.05607e+06	3.34235e+06	3.25425e+06	3.2912e+06	3.0792e+06	3.28918e+06	2.85804e+06	2.80706e+06	2.99195e+06	2.84561e+06	3.00755e+06	2.92658e+06	3.11493e+06	1.07397	1.04702	1.1111	0.917529	0.901163	0.960519	0.913539	0.965526	0.939532
C13843	4.81766e+06	2.1184e+06	1.05261e+07	5.77958e+06	6.80443e+06	5.6418e+06	6.94152e+06	6.58638e+06	6.22696e+06	5.43519e+06	5.90343e+06	5.66931e+06	5.57386e+06	1.04327	1.25125	1.2228	1.24537	1.18165	1.11717	0.975121	1.05913	1.01712
C04663	256592	247445	244867	2.41155e+07	1.18656e+08	2.13052e+07	3.67775e+07	1.15129e+07	2.56291e+07	1.15989e+07	1.79905e+07	1.47947e+07	249882	13.9339	1059.95	5.6889	147.179	46.0734	102.565	46.4175	71.9958	59.2067
C17047	3.40274e+06	786270	794619	6.09524e+06	812694	5.81167e+06	6.83022e+06	855119	6.65933e+06	4.00689e+06	7.04549e+06	5.52619e+06	2.11862e+06	2.96949	0.398379	0.390239	3.2239	0.40362	3.14324	1.89127	3.3255	2.60839
C00791	528424	417978	376041	554352	674114	567849	460985	992648	470760	471139	522337	496738	459931	7.34692	1.75411	2.11329	1.00229	2.15825	1.02354	1.02437	1.13568	1.08003
C09000	2.03634e+06	2.03883e+06	1.8645e+06	2.20741e+06	2.52239e+06	2.1372e+06	1.88496e+06	2.47767e+06	1.88272e+06	1.95378e+06	1.96574e+06	1.95976e+06	1.9898e+06	1.22668	1.51773	5.28154	0.947311	1.24519	0.946187	0.981902	0.987912	0.984907
C19173	4.30538e+07	2.08999e+07	1.76923e+07	8.47215e+07	623773	6.20234e+07	6.24098e+08	620326	1.82112e+08	5.83108e+07	1.1288e+08	8.55954e+07	2.85057e+07	18.2707	0.0212965	0.0230607	21.8938	0.0217615	6.38862	2.04558	3.95991	3.00275
C02572	267841	263705	260958	282561	407877	292478	331892	419581	314348	273624	332314	302969	264609	1.27813	1.47562	1.18461	1.25427	1.58566	1.18797	1.03407	1.25587	1.14497
C16785	2.42604e+06	799352	826941	2.30175e+06	2.84738e+06	2.44704e+06	2.99937e+06	3.80946e+06	2.30517e+06	2.40318e+06	2.41309e+06	2.40814e+06	1.60089e+06	1.46603	1.92447	1.97869	1.87356	2.37959	1.43993	1.50115	1.50734	1.50425
C01403	3.57859e+07	3.03906e+06	1.84716e+06	1.4138e+06	1.80651e+06	4.49992e+07	5.06516e+07	2.62578e+06	5.18555e+07	3.89821e+07	1.64027e+06	2.03112e+07	1.80906e+07	2.53376	0.200674	0.0864891	2.79989	0.145146	2.86644	2.15483	0.0906701	1.12275
C15322	597810	709181	666352	672814	729256	603326	650069	663973	647131	610206	601663	605935	651829	0.987563	1.07989	0.958519	0.9973	1.01863	0.992792	0.936144	0.923038	0.929591
C04584	4.95018e+08	5.39989e+08	5.23275e+08	5.98627e+08	5.94759e+08	5.62108e+08	5.82463e+08	5.90829e+08	5.9051e+08	4.59526e+08	5.31475e+08	4.95501e+08	5.24627e+08	1.11105	1.06662	1.00477	1.11024	1.12619	1.12558	0.87591	1.01305	0.944481
C01455	7.56606e+06	362300	395011	8.59083e+06	780748	1.0938e+07	7.12458e+06	379238	3.8389e+06	3.22412e+06	9.32899e+06	6.27656e+06	4.38501e+06	1.86664	0.118305	0.0840617	1.62476	0.0864851	0.875459	0.73526	2.12747	1.43137
C09421	520204	367781	373904	1.11983e+06	4.42249e+06	884312	1.63606e+06	659010	1.50482e+06	620311	2.24272e+06	1.43152e+06	433624	3.86799	10.5267	9.56712	3.77298	1.51977	3.47033	1.43053	5.17204	3.30128
C00318	486878	385115	346476	510767	621113	523202	455287	2.93215e+06	469987	434096	481269	457683	423770	1.37715	1.75411	3.54246	1.07437	6.9192	1.10906	1.02437	1.13568	1.08003
C17038	685106	690686	709575	736780	647949	692159	773737	636896	762420	692254	753441	722848	695000	0.997882	0.939713	0.943417	1.11329	0.916397	1.09701	0.996049	1.08409	1.04007
C08057	4.44043e+08	4.59768e+08	4.61062e+08	5.29674e+08	2.57996e+08	2.50271e+08	2.79497e+08	2.47717e+08	5.63704e+08	5.38861e+08	2.57091e+08	3.97976e+08	4.68381e+08	1.14222	0.523206	1.03994	0.59673	0.52888	1.20352	1.15048	0.548893	0.849685
C15025	459308	355426	334251	594764	698092	567002	484733	642347	495766	461300	561148	511224	392738	1.56204	1.76021	2.08979	1.23424	1.63556	1.26233	1.17457	1.42881	1.30169
C05122	491057	523443	493516	540391	483096	540664	530021	438898	499197	491660	511714	501687	508205	1.02095	0.933333	0.902058	1.04293	0.863624	0.982276	0.967446	1.00691	0.987176
C19954	5.28694e+06	5.33845e+06	5.21465e+06	5.26521e+06	5.56683e+06	5.19853e+06	5.42679e+06	5.46332e+06	5.26434e+06	5.4528e+06	5.08685e+06	5.26983e+06	5.27268e+06	0.96534	1.10309	1.04065	1.02923	1.03616	0.998418	1.03416	0.964756	0.999459
C01563	1.60818e+07	1.33331e+06	2.85615e+06	1.08089e+06	1.10955e+06	1.03102e+06	1.03857e+06	1.05346e+06	1.06552e+06	1.01886e+06	1.0356e+06	1.02723e+06	5.84296e+06	0.182426	0.181926	0.175516	0.177748	0.180296	0.18236	0.174374	0.177238	0.175806
C19282	408432	489250	470987	481763	450730	471016	418357	379285	437959	397322	425663	411492	436269	1.0566	1.09428	1.10944	0.958943	0.869383	1.00387	0.910725	0.975688	0.943207
C11195	3.00821e+06	1.96572e+06	1.63808e+06	2.24273e+06	1.80838e+06	2.38367e+06	1.53536e+06	1.5848e+06	1.52901e+06	2.42791e+06	2.48792e+06	2.45792e+06	2.35927e+06	0.686217	0.79025	0.731506	0.650778	0.671732	0.648088	1.02909	1.05453	1.04181
C20543	3.87883e+08	2.94689e+06	3.06338e+06	4.1993e+08	2.94335e+06	4.19614e+08	4.44981e+08	2.80126e+06	4.6549e+08	4.86356e+08	4.6491e+08	4.75633e+08	2.05681e+08	1.81458	0.0142687	0.0146816	2.16346	0.0136195	2.26317	2.36462	2.26035	2.31248
C18495	605446	645600	644707	618524	610028	651629	564161	513333	590302	562751	595833	579292	610587	0.981168	1.0582	1.07287	0.923965	0.84072	0.966778	0.921655	0.975837	0.948746
C14596	2.71865e+06	2.74513e+06	2.61373e+06	2.44758e+06	1.75336e+07	2.67319e+06	2.55357e+06	3.03579e+06	2.51814e+06	2.80394e+06	2.51647e+06	2.6602e+06	2.69438e+06	0.890076	7.1562	5.35076	0.947741	1.12671	0.934588	1.04066	0.933969	0.987315
C07544	4.7385e+06	4.70702e+06	4.70669e+06	5.06391e+06	4.56195e+06	4.93045e+06	5.31638e+06	4.85748e+06	5.38971e+06	4.84458e+06	5.2501e+06	5.04734e+06	4.74296e+06	1.03948	0.924623	0.957717	1.1209	1.02415	1.13636	1.02143	1.10692	1.06418
C19892	1.41019e+07	934978	910614	2.42776e+07	4.27812e+07	1.92389e+07	2.87686e+07	2.43446e+07	2.40633e+07	2.32288e+07	3.46097e+07	2.89192e+07	7.66631e+06	3.20596	5.56735	4.30127	3.7526	3.17553	3.13884	3.02998	4.51452	3.77225
C02420	424950	315029	1.08427e+06	439301	587944	437031	471268	511212	455998	384534	471746	428140	571901	0.742517	1.00931	0.946522	0.824037	0.893882	0.797338	0.672378	0.824873	0.748625
C08972	848033	896989	884475	978010	892520	1.02174e+06	1.10962e+06	850405	952186	895877	957263	926570	857869	1.18954	1.00471	1.07144	1.29346	0.9913	1.10994	1.04431	1.11586	1.08008
C15584	2.26387e+06	2.28075e+06	2.34831e+06	2.21704e+06	2.25648e+06	2.36817e+06	2.25769e+06	2.14168e+06	2.2516e+06	2.26184e+06	2.31349e+06	2.28766e+06	2.29817e+06	1.02507	0.942444	0.99212	0.982387	0.931909	0.979734	0.984191	1.00666	0.995428
C18435	305954	286331	252914	318675	340782	318895	335054	344706	348654	320960	338862	329911	285571	1.14119	1.21799	1.17444	1.17328	1.20708	1.2209	1.12392	1.18661	1.15527
C10997	7.76442e+06	3.32224e+07	5.39362e+07	4.82342e+06	1.87119e+06	4.74615e+06	5.96735e+06	1.68409e+06	4.48696e+06	1.03369e+07	9.11279e+06	9.72485e+06	2.5552e+07	0.176772	0.0668309	0.0671856	0.233538	0.0659082	0.175601	0.404544	0.356637	0.38059
C19506	2.48474e+06	2.50895e+06	2.38885e+06	2.49821e+06	2.59324e+06	4.25069e+06	6.6695e+06	2.50612e+06	5.85576e+06	2.56269e+06	8.45304e+06	5.50787e+06	2.46723e+06	0.98321	1.10792	1.02314	2.70324	1.01576	2.37341	1.03869	3.42613	2.23241
C03228	560512	497134	419289	616836	657119	608377	503070	1.04822e+06	525970	532480	560026	546253	513070	1.20924	1.27401	1.27284	0.980509	2.04303	1.02514	1.03783	1.09152	1.06467
C06694	759401	268705	277979	760114	880013	763826	907688	873761	774891	755551	740372	747961	522636	1.44375	1.75512	1.64094	1.73675	1.67184	1.48266	1.44566	1.41661	1.43113
C18399	6.14361e+07	5.97457e+07	6.12398e+07	6.1617e+07	6.92925e+07	6.36289e+07	1.29425e+07	6.80373e+07	6.68862e+07	5.75727e+07	6.3769e+07	6.06708e+07	6.06796e+07	1.0489	1.07591	1.07784	0.213292	1.12125	1.10228	0.948797	1.05091	0.999854
C18514	810904	809202	833150	812677	806245	797165	815958	828751	821181	822825	832041	827433	815089	0.977279	1.04892	8.4261	1.00107	1.01676	1.00747	1.00949	1.0208	1.01514
C01874	4.25843e+08	4.21844e+08	4.24349e+08	4.41482e+08	4.39793e+08	4.35428e+08	4.30766e+08	4.29861e+08	4.29065e+08	4.2697e+08	4.29303e+08	4.28136e+08	4.23517e+08	1.05319	1.02683	1.02837	1.01712	1.01498	1.0131	1.00815	1.01366	1.01091
C19128	2.62104e+07	714429	311863	2.85688e+07	2.091e+08	3.79634e+07	3.12621e+07	4.77452e+07	2.88486e+07	3.14922e+07	3.41972e+07	3.28447e+07	1.16381e+07	2.55548	7.74959	7.77152	2.68619	4.1025	2.47881	2.70596	2.93839	2.82217
C00318	1.27249e+06	1.31206e+06	1.31487e+06	1.24317e+06	1.27188e+06	1.16378e+06	1.05394e+06	1.12745e+06	1.1074e+06	1.14919e+06	1.04952e+06	1.09935e+06	1.29843e+06	0.920761	0.928561	1.03527	0.811704	0.868315	0.852877	0.885059	0.808296	0.846677
C11510	4.15341e+08	4.13115e+08	4.09903e+08	4.24496e+08	4.42322e+08	4.41828e+08	4.25818e+08	4.10103e+08	4.28601e+08	4.24526e+08	4.118e+08	4.18163e+08	4.14037e+08	1.06091	1.07084	1.03718	1.02845	0.990498	1.03518	1.02533	0.994597	1.00997
C15562	1.41399e+08	1.52243e+08	1.5054e+08	1.29531e+08	1.30799e+08	1.37739e+08	1.39852e+08	1.35198e+08	1.36261e+08	1.32334e+08	1.30663e+08	1.31498e+08	1.46614e+08	0.908904	0.865957	0.889308	0.95388	0.922138	0.929384	0.902602	0.891201	0.896902
C12454	4.68645e+07	3.49715e+07	3.2558e+07	9.38178e+07	3.8832e+07	8.55169e+07	9.63714e+07	3.18228e+07	9.49119e+07	5.55431e+07	8.03504e+07	6.79467e+07	4.0382e+07	2.08983	0.954658	1.14997	2.3865	0.788046	2.35035	1.37544	1.98976	1.6826
C04104	2.37208e+06	2.09968e+06	2.21494e+06	2.82476e+06	3.8033e+06	2.99066e+06	3.01283e+06	3.03548e+06	2.93305e+06	2.62136e+06	3.05589e+06	2.83862e+06	2.25174e+06	1.25067	1.58163	1.44634	1.338	1.34806	1.30257	1.16415	1.35712	1.26063
C14402	3.1281e+06	1.82781e+06	1.73923e+06	2.39356e+06	2.99095e+06	2.55891e+06	2.51533e+06	2.63878e+06	2.54092e+06	2.25861e+06	2.45241e+06	2.35551e+06	2.36676e+06	1.02796	1.30755	1.19558	1.06277	1.11494	1.07359	0.954305	1.03619	0.995247
C19031	1.23608e+08	1.41203e+08	1.372e+08	1.5694e+08	1.52487e+08	1.62765e+08	1.44918e+08	1.51562e+08	1.4237e+08	1.16901e+08	1.139e+08	1.15401e+08	1.31272e+08	1.18799	1.46711	1.19607	1.10395	1.15456	1.08454	0.890525	0.867664	0.879094
C00546	8.38189e+06	9.97559e+06	7.38667e+06	4.18323e+06	3.65795e+06	5.18982e+06	4.56736e+06	1.72736e+07	5.08352e+06	6.06382e+06	4.72767e+06	5.39574e+06	9.07618e+06	1.444	0.376588	1.5005	0.503224	1.90317	0.560094	0.668102	0.520887	0.594495
C03113	3.57369e+08	4.09771e+08	4.28775e+08	1.83576e+08	9.99195e+07	2.96043e+08	2.45786e+08	3.52427e+08	1.58294e+08	1.99837e+08	1.50603e+08	1.7522e+08	3.83615e+08	0.762018	0.847968	0.887676	0.640711	0.9187	0.412638	0.520931	0.392589	0.45676
C07115	8.93559e+06	1.76107e+06	776822	1.9356e+07	3.50452e+08	5.77821e+07	1.74754e+08	2.45474e+08	9.87417e+06	1.36494e+08	8.08882e+07	1.08691e+08	4.6209e+06	9.01594	74.9157	79.1896	37.8182	53.1226	2.13685	29.5384	17.5049	23.5217
C15032	1.13718e+06	128917	135358	127789	126204	127664	127554	129719	125615	124125	119691	121908	729488	0.173779	0.169139	0.176433	0.174854	0.177823	0.172196	0.170154	0.164075	0.167114
C00257	2.06147e+06	2.10124e+06	2.0862e+06	2.31483e+06	2.23167e+06	2.3037e+06	2.20641e+06	2.26964e+06	2.25622e+06	2.25574e+06	2.19376e+06	2.22475e+06	2.09814e+06	1.10309	1.07288	1.10835	1.0516	1.08174	1.07534	1.07511	1.04558	1.06034
C06756	2.48955e+07	1.23598e+06	1.2176e+06	3.63622e+07	1.24389e+06	3.46609e+07	3.43445e+07	1.18071e+06	4.17506e+07	3.67378e+07	4.18664e+07	3.93021e+07	1.34852e+07	2.5685	0.0885078	0.0946348	2.54683	0.0875564	3.09604	2.72431	3.10462	2.91446
C19310	1.80976e+07	2.79263e+06	2.78513e+06	2.48494e+07	2.4691e+06	2.44904e+07	2.68974e+07	2.51114e+06	2.76807e+07	2.45411e+07	2.74993e+07	2.60202e+07	1.06929e+07	2.0651	0.25537	0.2328	2.51543	0.234842	2.58869	2.29507	2.57172	2.4334
C05143	1.12414e+06	1.22945e+06	1.19704e+06	1.21064e+06	1.02191e+06	1.20989e+06	1.0513e+06	977750	1.10056e+06	1.00734e+06	1.1063e+06	1.05682e+06	1.13224e+06	1.03802	1.01155	1.12441	0.928516	0.863554	0.97202	0.88969	0.977088	0.933389
C09420	2.70369e+08	2.67249e+06	2.6352e+06	3.02945e+08	2.66927e+06	3.05337e+08	3.19132e+08	2.54042e+06	3.44314e+08	2.91197e+08	3.30888e+08	3.11043e+08	1.43418e+08	1.84216	0.0179056	0.0190947	2.22519	0.0177134	2.40077	2.03041	2.30716	2.16878
C09020	2.92103e+06	2.47005e+08	1.00356e+08	6.36899e+06	2.88506e+06	1.03466e+07	1.5572e+07	6.57863e+07	1.37805e+07	1.08548e+07	1.97558e+07	1.53053e+07	8.86116e+07	0.0830152	0.031323	0.0334033	0.175734	0.742413	0.155515	0.122499	0.222949	0.172724
C01995	2.31985e+06	2.53717e+06	2.47029e+06	1.0448e+07	2.66256e+07	9.85399e+06	1.01407e+07	1.76866e+07	8.34473e+06	8.73798e+06	1.24597e+07	1.05989e+07	3.19276e+06	3.33445	9.61116	9.9703	3.17615	5.5396	2.61364	2.73681	3.90249	3.31965
C17547	700488	660990	671114	755000	645566	718980	796058	681359	807038	708807	786133	747470	688566	1.03863	0.920567	0.883272	1.15611	0.989534	1.17206	1.0294	1.1417	1.08555
C14395	1.42577e+06	859594	921433	1.68925e+06	718659	2.21868e+06	2.33587e+06	1.53401e+06	3.48126e+06	3.46622e+06	4.31756e+06	3.89189e+06	1.18159e+06	1.81119	0.605813	0.588131	1.97688	1.29826	2.94625	2.93352	3.65403	3.29377
C00099	2.93558e+06	3.21184e+06	3.22171e+06	4.91636e+06	1.88574e+07	6.01641e+06	2.9173e+06	2.93329e+07	6.65038e+06	2.91518e+06	2.93303e+06	2.92411e+06	3.0956e+06	1.1071	5.49613	5.05044	0.942404	9.47567	2.14833	0.941719	0.947484	0.944601
C00855	1.01821e+06	906323	735904	2.91068e+06	1.75902e+06	1.64293e+06	1.27979e+06	2.53556e+07	923141	934567	1.38158e+06	1.15807e+06	917560	1.33013	2.04809	4.24095	1.39478	27.6337	1.00608	1.01853	1.50571	1.26212
C01659	598291	530640	447107	663047	736489	1.84512e+06	1.16049e+06	7.27765e+06	559780	778720	937621	858170	547540	4.18265	1.49077	7.10693	2.11946	13.2915	1.02235	1.42221	1.71242	1.56732
C08953	134151	62298.4	59207	136915	191847	166588	153998	185102	154970	144904	149496	147200	97641.7	1.48542	1.9249	1.77155	1.57717	1.89573	1.58713	1.48403	1.53107	1.50755
C02334	1.73075e+08	1.22291e+06	1.25564e+06	1.89296e+08	2.58901e+08	3.70418e+08	3.27636e+08	1.54854e+08	1.65128e+08	1.87591e+08	1.65569e+08	1.7658e+08	1.12774e+08	1.62645	1.28011	2.33824	2.90525	1.37314	1.46424	1.66343	1.46816	1.56579
C00670	553817	590547	589730	596427	558007	596061	516052	469558	539964	514762	545023	529893	550023	1.05145	1.07455	1.08944	0.938238	0.853707	0.981713	0.935892	0.990911	0.963402
C09313	4.23689e+07	3.3409e+06	1.00917e+06	1.55589e+08	3.42245e+08	1.60991e+08	1.65687e+08	1.19986e+06	1.66618e+08	1.43494e+08	1.99691e+08	1.71592e+08	2.62263e+07	6.87215	13.2427	0.054299	6.31761	0.0457503	6.35311	5.4714	7.61414	6.54277
C02648	2.7262e+06	2.907e+06	2.90298e+06	2.86798e+06	2.74683e+06	2.93415e+06	2.5403e+06	2.50407e+06	2.65801e+06	2.53845e+06	2.68291e+06	2.61068e+06	2.76006e+06	1.08123	1.05409	1.11369	0.920378	0.90725	0.963025	0.919709	0.972048	0.945879
C19138	1.16911e+06	5.06034e+06	2.95163e+06	1.47453e+06	2.00303e+06	1.43766e+06	1.21193e+06	1.49953e+06	1.28235e+06	1.26786e+06	1.29399e+06	1.28093e+06	2.57679e+06	0.664006	0.69852	0.789649	0.470327	0.581939	0.497656	0.492031	0.502173	0.497102
C13355	326068	321034	317689	1.67201e+06	6.22442e+06	369351	2.29248e+06	2.98301e+06	6.26016e+06	523769	2.29199e+06	1.40788e+06	322135	7.33049	48.3132	1.47764	7.11653	9.26013	19.4334	1.62593	7.115	4.37047
C05562	3.48709e+07	4.46291e+07	4.45679e+07	4.2861e+07	3.29131e+07	3.83147e+07	3.67558e+07	3.11504e+07	3.5588e+07	2.30788e+06	2.83259e+07	1.53169e+07	3.95264e+07	0.983563	0.887645	0.904878	0.929906	0.788091	0.90036	0.0583883	0.716632	0.38751
C17540	1.95686e+08	2.56874e+06	2.56761e+06	2.20859e+08	2.11854e+08	3.52593e+08	3.27636e+08	8.23712e+07	2.2226e+08	2.10395e+08	3.32643e+07	1.2183e+08	1.19091e+08	2.50396	0.821624	1.8213	2.75114	0.691666	1.86631	1.76667	0.279319	1.023
C02008	514257	1.96266e+06	1.50058e+06	494150	439012	529193	519273	475917	661319	484419	477431	480925	1.11486e+06	1.19957	0.397542	0.406266	0.465773	0.426884	0.593184	0.43451	0.428242	0.431376
C11758	1.7854e+06	1.76655e+06	1.75183e+06	1.83971e+06	1.84593e+06	1.85173e+06	1.88479e+06	1.79502e+06	1.94861e+06	1.85226e+06	1.87814e+06	1.8652e+06	1.77353e+06	1.04853	1.01571	1.06109	1.06273	1.01212	1.09872	1.04439	1.05898	1.05169
C15502	2.12493e+06	2.04471e+06	2.10838e+06	2.21488e+06	1.38594e+08	2.37104e+06	2.42115e+06	7.68033e+07	3.0442e+06	5.50093e+06	2.38097e+06	3.94095e+06	2.09963e+06	19.4033	81.9308	69.9596	1.15313	36.5795	1.44988	2.61995	1.134	1.87697
C06562	204274	201120	199025	229448	311076	242160	233449	222059	229908	221052	225043	223047	201810	1.27813	1.47562	1.19153	1.15677	1.10034	1.13923	1.09535	1.11512	1.10523
C09766	231796	228217	225839	4.14182e+06	1.16205e+07	2.86494e+06	4.39087e+06	2.58114e+06	3.34797e+06	1.60951e+06	4.53539e+06	3.07245e+06	228999	4.08678	108.05	1.18461	19.1742	11.2714	14.62	7.02846	19.8053	13.4169
C11849	1.18037e+06	441947	980093	1.15439e+06	1.31636e+06	1.12604e+06	1.29613e+06	1.57425e+06	1.3586e+06	1.4229e+06	1.31428e+06	1.36859e+06	954455	1.18912	1.44216	1.3649	1.35797	1.64937	1.42343	1.49079	1.377	1.43389
C00571	3.99327e+06	5.70781e+06	4.85833e+06	2.60013e+06	3.23338e+06	2.7339e+06	2.59967e+06	2.69224e+06	2.60641e+06	2.63124e+06	2.59826e+06	2.61475e+06	4.17718e+06	0.62295	0.728682	0.721023	0.62235	0.644512	0.623963	0.629908	0.622014	0.625961
C09362	413608	400396	400482	422167	418760	410086	416508	410086	406552	411161	404724	407942	401446	1.05958	1.04997	1.07315	1.03752	1.02152	1.01272	1.0242	1.00816	1.01618
C07463	3.13298e+06	1.62105e+06	2.30058e+07	2.52543e+07	2.86411e+06	2.31726e+07	4.02732e+06	8.06139e+06	6.29095e+06	2.52017e+06	5.20506e+06	3.86262e+06	7.38293e+06	0.826378	0.366116	0.315786	0.545491	1.0919	0.852094	0.341351	0.705013	0.523182
C19131	2.85992e+08	2.96551e+08	2.92526e+08	2.05334e+08	2.26838e+08	2.4639e+08	2.71977e+08	2.718e+08	2.81392e+08	3.26857e+08	3.37519e+08	3.32188e+08	2.91541e+08	0.707337	0.790421	0.813736	0.932894	0.932287	0.965188	1.12114	1.15771	1.13942
C03690	2.01357e+08	863558	940108	2.35581e+08	1.62946e+08	2.8507e+08	2.50855e+08	2.71589e+08	2.66557e+08	2.6354e+08	3.85163e+07	1.51028e+08	1.12987e+08	2.97948	1.32765	2.38066	2.22022	2.40373	2.35919	2.33249	0.340893	1.33669
C02115	2.42799e+06	2.50349e+06	2.50885e+06	2.37205e+06	2.42684e+06	2.41361e+06	2.06211e+06	2.15124e+06	2.16414e+06	2.19272e+06	2.17809e+06	2.18541e+06	2.47749e+06	0.988224	0.928561	0.988209	0.832339	0.868315	0.873521	0.885059	0.879153	0.882106
C12891	635022	625794	610659	667735	611361	645547	678826	650966	722292	649237	692168	670703	616364	1.03846	0.916502	0.955505	1.10134	1.05614	1.17186	1.05333	1.12299	1.08816
C11001	1.2912e+08	1.33231e+08	1.34991e+08	1.12135e+08	1.17115e+08	1.21231e+08	1.2644e+08	1.24766e+08	1.23075e+08	1.242e+08	1.24167e+08	1.24184e+08	1.31739e+08	0.878547	0.846097	0.879096	0.959774	0.947069	0.934229	0.942776	0.942525	0.942651
C06356	2.61998e+06	2.54004e+06	2.55771e+06	2.69289e+06	2.64024e+06	2.755e+06	2.76088e+06	2.6185e+06	2.80228e+06	2.66373e+06	2.70093e+06	2.68233e+06	2.576e+06	1.08849	1.00566	0.992989	1.07177	1.0165	1.08784	1.03406	1.0485	1.04128
C07321	1.59857e+07	5.6798e+06	1.50568e+07	1.6734e+06	1.18458e+06	1.56159e+06	1.72441e+06	1.31421e+07	2.93811e+06	1.47299e+07	1.63534e+07	1.55417e+07	9.72058e+06	0.13461	0.122116	0.676902	0.177397	1.35198	0.302256	1.51533	1.68235	1.59884
C01136	2.61325e+06	259303	384183	5.17768e+06	1.20114e+06	1.02542e+06	738347	1.0514e+06	961599	647241	427351	537296	989361	2.47889	0.99346	3.21268	0.746287	1.06271	0.971939	0.654201	0.431946	0.543074
C15903	951600	410506	418358	1.93486e+06	4.11555e+06	1.08683e+06	1.24973e+06	1.24411e+06	1.48786e+06	1.04806e+06	1.7393e+06	1.39368e+06	673009	1.73722	5.64096	3.58717	1.85693	1.84858	2.21076	1.55728	2.58437	2.07082
C08095	1.25214e+06	1.20346e+06	1.18979e+06	1.29736e+06	1.14632e+06	1.22389e+06	1.33136e+06	1.15639e+06	1.35771e+06	1.29007e+06	1.31419e+06	1.30213e+06	1.20949e+06	1.02632	1.04551	1.00011	1.10076	0.956092	1.12254	1.06662	1.08656	1.07659
C09953	378029	411541	428407	414525	403783	422982	431592	411309	405736	403602	411146	407374	398793	1.04658	1.16497	1.14843	1.08225	1.03138	1.01741	1.01206	1.03097	1.02152
C10487	389630	400752	443616	433067	408365	427725	405737	415976	417129	410192	406975	408583	399978	1.05648	1.1747	1.15802	1.0144	1.04	1.04288	1.02554	1.01749	1.02152
C07872	1.85959e+07	822206	833086	2.79537e+07	760675	1.13965e+08	1.45499e+08	697792	1.16034e+08	5.12529e+07	2.98831e+07	4.0568e+07	1.6674e+07	2.07253	0.0463209	0.0444493	8.72612	0.0418491	6.959	3.07382	1.79219	2.43301
C21217	5.95528e+07	375318	375994	9.36885e+07	4.20998e+06	1.14296e+08	1.57989e+08	1.56566e+06	1.24378e+08	5.4032e+07	9.74816e+07	7.57568e+07	2.84633e+07	4.93075	0.0128354	0.341887	5.55063	0.0550062	4.36977	1.8983	3.42481	2.66156
C01569	1.75712e+06	1.53219e+06	1.46698e+06	2.06084e+06	2.54799e+06	2.14506e+06	2.19805e+06	2.21457e+06	2.12997e+06	1.89332e+06	2.22946e+06	2.06139e+06	1.60939e+06	1.27662	1.61189	1.47636	1.36576	1.37603	1.32346	1.17642	1.38528	1.28085
C08148	1.13029e+08	590815	576354	1.59642e+08	594595	1.65486e+08	3.10201e+08	530135	2.71553e+08	2.22462e+08	2.39779e+08	2.3112e+08	2.91003e+07	0.140795	0.0196056	0.019113	10.6597	0.0182175	9.33163	7.64467	8.23974	7.9422
C10149	2.56692e+06	2.70597e+06	2.63464e+06	2.66455e+06	2.4842e+06	2.66292e+06	2.31387e+06	2.15198e+06	2.42228e+06	2.29972e+06	2.43491e+06	2.36731e+06	2.56153e+06	1.01049	1.0308	1.09389	0.903317	0.840118	0.94564	0.897791	0.95057	0.924181
C16365	781696	796784	763997	756764	788306	775312	690756	661638	704192	739483	671327	705405	776390	1.04621	0.862469	0.999397	0.889703	0.852198	0.907008	0.952464	0.864678	0.908571
C00388	585371	536990	366182	251520	299737	254026	273554	254183	251881	218040	252484	235262	441201	0.541774	0.664832	0.657303	0.620022	0.576115	0.570899	0.494196	0.572266	0.533231
C14460	1.12393e+08	1.0291e+08	2.98795e+08	1.31309e+08	1.04309e+08	1.18962e+08	1.01047e+08	1.14139e+08	1.14305e+08	1.07527e+08	1.23513e+08	1.1552e+08	1.54163e+08	0.714349	0.869636	0.760751	0.655456	0.74038	0.741456	0.697488	0.801184	0.749336
C11014	313748	376141	359659	365462	330095	374994	334990	315831	330753	324815	346502	335658	340363	1.1154	1.08696	1.20822	0.984213	0.927924	0.971765	0.954318	1.01804	0.986177
C01595	613454	552945	529774	782382	1.21007e+06	805393	847950	3.15338e+06	839310	738640	877057	807848	583062	1.25511	2.10371	1.65742	1.4543	5.40831	1.43949	1.26683	1.50422	1.38553
C04152	1.60066e+08	1.72827e+08	7.54047e+07	8.41187e+07	2.07037e+08	2.17428e+08	2.27122e+08	9.31127e+07	2.00027e+08	2.56613e+08	1.97548e+08	2.27081e+08	1.50409e+08	0.624285	0.629908	1.251	1.51003	0.619062	1.32988	1.7061	1.31341	1.50975
C15561	365881	324510	273426	361942	428942	396094	328385	372076	337720	347582	354444	351013	334845	1.15272	1.27427	1.27309	0.980707	1.11119	1.00859	1.03804	1.05853	1.04829
HMDB0253028	484704	429897	362223	533410	596665	524729	435030	519916	453504	460463	484283	472373	443589	1.15272	1.42204	1.32606	0.980707	1.17207	1.02235	1.03804	1.09174	1.06489
C09622	633891	638868	641317	673313	658749	676860	667141	639698	655062	641509	644547	643028	637743	1.03875	1.01916	1.05236	1.0461	1.00307	1.02716	1.00591	1.01067	1.00829
C07289	2.96708e+06	1.26909e+06	1.26993e+06	3.06134e+06	3.99518e+06	3.27511e+06	3.58e+06	3.76142e+06	3.45584e+06	3.24308e+06	3.53495e+06	3.38902e+06	2.10393e+06	1.50776	1.88446	1.70394	1.70157	1.7878	1.64256	1.54144	1.68016	1.6108
C11544	752459	729359	749628	732491	726694	718509	735448	770341	740156	726000	774512	750256	739728	0.970591	1.05533	1.06176	0.994215	1.04139	1.00058	0.981442	1.04702	1.01423
C01267	6.89456e+06	6.61398e+06	6.77508e+06	6.66597e+06	6.95281e+06	6.53178e+06	6.83638e+06	6.72252e+06	6.9417e+06	6.74683e+06	6.58952e+06	6.66817e+06	6.72318e+06	0.981856	0.993241	0.992033	1.01684	0.999903	1.0325	1.00352	0.980119	0.991819
C12915	4.73312e+06	7.42546e+07	2.96085e+07	8.68168e+07	3.55626e+06	1.20033e+08	2.15192e+08	3.4491e+06	1.50093e+08	7.45742e+07	2.23181e+08	1.48878e+08	3.06408e+07	2.8686	0.122779	0.114409	7.02305	0.112566	4.89847	2.43382	7.28377	4.85879
C07425	5.66645e+06	3.29503e+06	4.59193e+06	2.57655e+06	2.80681e+06	2.49227e+06	6.44694e+06	3.82186e+07	3.65108e+07	3.51043e+07	3.19268e+07	3.35156e+07	1.07816e+07	0.207982	0.359742	0.188199	0.597957	3.5448	3.3864	3.25595	2.96123	3.10859
C03065	1.72489e+06	1.73775e+06	1.78923e+06	1.66624e+06	1.71926e+06	1.80436e+06	1.72018e+06	1.63179e+06	1.67869e+06	1.70589e+06	1.66537e+06	1.68563e+06	1.75102e+06	1.02507	0.937501	0.966435	0.982387	0.931909	0.958693	0.974228	0.951084	0.962656
HMDB0013158	2.19914e+06	2.46143e+06	2.31084e+06	2.35992e+06	2.71451e+06	2.31484e+06	2.3227e+06	2.50328e+06	2.27885e+06	2.22516e+06	2.24459e+06	2.23488e+06	2.31251e+06	0.982259	1.22208	1.17907	1.0044	1.0825	0.985442	0.962228	0.97063	0.966429
C08804	3.9466e+06	3.13704e+06	3.04577e+06	4.71367e+06	3.04572e+06	4.46948e+06	5.52472e+06	2.9424e+06	4.94184e+06	3.7593e+06	3.98149e+06	3.87039e+06	3.55009e+06	1.79371	0.821926	0.845712	1.55622	0.828826	1.39203	1.05893	1.12152	1.09022
C18412	967490	980732	1.04956e+06	2.59119e+07	944275	2.15187e+07	3.058e+07	951069	3.1198e+07	2.83795e+06	1.59022e+07	9.37008e+06	2.86565e+06	6.65096	0.318992	0.319727	10.6712	0.331886	10.8869	0.990333	5.54924	3.26979
C09795	796969	760573	760465	953534	1.03124e+06	910858	921357	951109	905671	815499	900193	857846	781916	1.16701	1.25646	1.22758	1.17833	1.21638	1.15827	1.04295	1.15127	1.09711
C00280	1.24768e+06	3.54554e+06	6.80816e+06	1.35184e+06	329019	941459	780967	303735	712538	4.40068e+06	1.14667e+06	2.77367e+06	3.35528e+06	0.714697	0.0982685	0.0867144	0.232758	0.0905244	0.212363	1.31157	0.341751	0.82666
C17614	1.7916e+07	487267	465462	7.70827e+07	522990	7.29713e+07	1.01574e+08	453152	9.76308e+07	5.68367e+07	1.10652e+08	8.37444e+07	1.38493e+07	4.9541	0.0358546	0.0340196	7.3342	0.0327202	7.04949	4.10393	7.9897	6.04682
C14852	2.77939e+06	2.98363e+06	3.58556e+06	2.54673e+06	2.71073e+06	2.37949e+06	3.94629e+06	3.578e+06	2.93369e+06	2.5036e+08	3.31801e+06	1.26839e+08	3.21466e+06	1.00374	1.30364	0.80746	1.22759	1.11303	0.9126	77.8808	1.03215	39.4565
HMDB0000439	8.10931e+07	1.79465e+08	1.6496e+08	9.8653e+07	2.08692e+08	9.27506e+07	8.73094e+07	1.79963e+08	2.19986e+08	2.22193e+08	2.16626e+08	2.19409e+08	1.25199e+08	1.77476	1.77659	1.65124	0.697364	1.43741	1.75709	1.77472	1.73025	1.75248
C01620.	255640	260241	244084	275759	286110	303957	321241	437795	303391	280086	324794	302440	255260	1.24826	1.64469	1.51361	1.25849	1.71509	1.18856	1.09726	1.2724	1.18483
C00219	673587	590349	574485	823819	1.29192e+06	859875	905310	7.98894e+06	896086	806224	936386	871305	629382	1.2414	2.01048	1.63931	1.43841	12.6933	1.42376	1.28098	1.48779	1.38438
C00253	1.39594e+06	1.57985e+06	1.60866e+06	1.53499e+06	1.53132e+06	1.57503e+06	1.40701e+06	1.32654e+06	1.41036e+06	1.36427e+06	1.45536e+06	1.40981e+06	1.5065e+06	1.05912	1.03145	1.14653	0.933956	0.880542	0.936186	0.905588	0.966053	0.935821
C10460	1.51654e+06	1.1739e+06	1.19142e+06	1.55604e+06	1.84809e+06	1.65484e+06	1.97893e+06	1.95983e+06	1.75596e+06	1.60109e+06	1.90447e+06	1.75278e+06	1.35721e+06	1.22895	1.40599	1.48407	1.45808	1.44402	1.2938	1.17969	1.40322	1.29146
C14519	392625	288158	463774	460832	672683	482815	386396	503592	370394	394669	397191	395930	375717	6.57302	1.60887	1.80434	1.02842	1.34035	0.985833	1.05044	1.05716	1.0538
C17710	2.76217e+06	2.66558e+06	2.67354e+06	2.60308e+06	2.89374e+06	2.62397e+06	2.76984e+06	2.87544e+06	2.60551e+06	2.59841e+06	2.57567e+06	2.58704e+06	2.7162e+06	0.940246	1.11548	1.05018	1.01975	1.05863	0.959246	0.956633	0.948262	0.952448
C00183	9.31317e+06	8.88361e+06	8.74197e+06	7.77529e+06	8.55783e+06	8.59888e+06	9.09131e+06	8.67853e+06	8.0173e+06	9.21277e+06	8.99653e+06	9.10465e+06	8.96553e+06	0.963406	0.902556	0.842449	1.01403	0.967989	0.894236	1.02758	1.00346	1.01552
C11959	8.84753e+06	681494	669061	1.99069e+07	634027	1.32149e+07	2.21414e+07	654837	1.96068e+07	3.98048e+06	2.17334e+07	1.28569e+07	4.03213e+06	3.14191	0.177594	0.156292	5.49123	0.162405	4.86263	0.987189	5.39005	3.18862
C16746	5.96697e+07	449777	449256	6.34408e+07	1.50242e+08	8.99973e+07	1.09033e+08	3.17986e+07	1.05631e+08	7.34734e+07	2.94051e+07	5.14392e+07	3.26861e+07	3.03564	4.78532	3.82545	3.33577	0.972849	3.23169	2.24785	0.899621	1.57374
C02502	570923	653814	562307	700463	695130	714466	630141	644302	611412	627644	622563	625104	607836	1.26326	1.153	2.13599	1.0367	1.05999	1.00588	1.03259	1.02423	1.02841
C00712	595141	460676	449854	626292	777027	649413	776597	769104	725763	676593	747377	711985	528629	1.23822	1.41659	1.49526	1.46908	1.4549	1.37292	1.2799	1.4138	1.34685
C05189	4.34963e+07	1.28658e+06	1.30024e+06	1.76647e+08	1.41351e+06	1.28279e+08	1.3798e+08	1.40085e+06	1.63753e+08	7.28725e+07	1.75608e+08	1.2424e+08	4.04277e+07	2.82458	0.0341614	0.0342903	3.41301	0.0346508	4.05052	1.80254	4.34376	3.07315
C08898	1.37761e+07	5.09129e+06	1.26726e+07	1.71968e+07	2.67115e+06	1.60617e+07	1.52595e+07	3.58616e+06	2.13129e+06	1.0336e+07	1.31841e+07	1.17601e+07	1.09617e+07	1.5942	0.866413	1.50155	1.39207	0.327153	0.19443	0.942918	1.20274	1.07283
C03066	693699	548708	494645	1.78472e+07	1.11628e+08	2.05821e+07	1.87054e+07	2.75247e+07	1.81382e+07	1.00251e+07	1.8796e+07	1.44106e+07	606255	87.9315	278.797	221.794	30.8541	45.4011	29.9184	16.5361	31.0035	23.7698
C05853	3.2985e+06	1.16833e+06	1.18942e+06	1.40729e+06	1.19261e+06	1.47573e+06	2.1633e+06	3.58197e+06	2.22023e+06	1.89213e+06	1.88008e+06	1.8861e+06	1.76044e+06	0.798774	0.652413	0.655875	1.22884	2.03471	1.26118	1.07481	1.06796	1.07138
C13140	1.89023e+08	1.56513e+08	1.30691e+08	1.04039e+08	6.38428e+07	1.21154e+08	8.85044e+07	7.96706e+07	8.60974e+07	1.14082e+08	1.05549e+08	1.09815e+08	1.72619e+08	0.738434	0.297086	0.484059	0.512715	0.461539	0.49877	0.660886	0.611456	0.636171
C00903	2.80305e+06	629836	567779	2.66684e+07	1.86345e+08	2.55484e+07	8.44348e+06	7.01405e+07	1.38675e+07	1.61779e+07	3.48067e+07	2.54923e+07	1.24782e+06	42.1548	170.869	96.2157	6.76657	56.2102	11.1134	12.9649	27.8939	20.4294
C02059	2.05109e+06	737219	746620	2.08737e+06	2.33054e+06	2.05729e+06	2.31182e+06	2.22296e+06	2.02481e+06	1.9818e+06	2.26048e+06	2.12114e+06	1.38103e+06	1.50416	1.85838	1.74786	1.67398	1.60963	1.46616	1.43501	1.6368	1.53591
C01879	1.04053e+06	926191	752036	1.10635e+06	1.2889e+06	1.09118e+06	907738	1.26604e+06	943378	955054	1.00446e+06	979757	937674	1.33013	1.64572	1.75934	0.968074	1.3502	1.00608	1.01853	1.07122	1.04488
C05282	1.99051e+06	2.03687e+06	2.04123e+06	5.83089e+06	3.63318e+06	1.08318e+07	1.23271e+07	2.8871e+06	6.13331e+06	3.88151e+06	5.8797e+06	4.8806e+06	2.01948e+06	3.79381	2.56302	1.90465	6.1041	1.42963	3.03708	1.92203	2.91149	2.41676
C16996	1.25779e+08	1.85855e+08	1.86119e+08	1.03539e+08	1.95218e+08	1.18099e+08	1.05116e+08	1.92296e+08	9.79123e+07	1.41036e+08	9.51038e+07	1.1807e+08	1.60973e+08	0.683825	1.18411	1.23677	0.653002	1.19458	0.608252	0.876144	0.590805	0.733474
C19444	1.34022e+06	779806	760858	757667	684344	777428	694492	654774	696150	1.01447e+06	718359	866413	884011	1.2058	0.867627	0.964422	0.785615	0.740685	0.78749	1.14757	0.812614	0.980093
C07593	486004	396291	365797	560699	678303	556696	503806	512734	499568	444362	513650	479006	429051	1.65778	1.61856	1.89058	1.17423	1.19504	1.16436	1.03569	1.19718	1.11643
C05403	1.67038e+06	1.67776e+06	1.59754e+06	1.80497e+06	1.53901e+06	1.7574e+06	1.89496e+06	1.62193e+06	1.80259e+06	1.68727e+06	1.87133e+06	1.7793e+06	1.66589e+06	1.05488	0.93832	0.971904	1.13751	0.97361	1.08205	1.01283	1.12332	1.06808
C01453	2.08924e+06	1.9756e+06	1.9043e+06	2.18059e+06	2.07366e+06	2.17868e+06	2.22213e+06	1.92207e+06	2.22806e+06	2.14251e+06	2.14653e+06	2.14452e+06	1.9765e+06	1.09263	1.04239	1.02366	1.12427	0.972458	1.12728	1.08399	1.08602	1.08501
C05601	2.79085e+07	1.96007e+06	1.61301e+06	3.81578e+07	1.45968e+08	4.26533e+07	7.89398e+07	8.14586e+07	6.30595e+07	3.69718e+07	7.02025e+07	5.35872e+07	1.5105e+07	2.90097	10.1725	13.1935	5.22607	5.39283	4.17474	2.44765	4.64764	3.54765
C01697	262795	3.43617e+06	3.33384e+06	765288	1.31572e+06	970814	325639	295701	295772	284379	289513	286946	1.82343e+06	2.33087	1.0241	0.989174	0.178586	0.162167	0.162206	0.155958	0.158773	0.157366
C03373	323079	250008	235113	418359	568308	407901	326442	425454	324379	333431	367138	350284	276254	1.75727	1.84862	2.08979	1.18167	1.54009	1.17421	1.20698	1.32899	1.26798
C16450	9.14184e+06	1.13729e+06	1.12143e+06	2.11343e+07	1.13163e+06	2.27796e+07	2.27259e+07	1.08109e+06	1.44442e+07	1.23434e+07	2.73149e+07	1.98292e+07	7.13746e+06	2.61012	0.15311	0.163279	3.18403	0.151467	2.02371	1.72938	3.82698	2.77818
C16921	567183	582795	557555	578959	532018	598273	625332	519141	638495	584537	641215	612876	575457	1.03653	1.03604	0.938408	1.08667	0.902138	1.10954	1.01578	1.11427	1.06503
C10313	569385	682053	656593	671615	566915	656633	583223	542419	610549	553897	595094	574496	608193	1.07204	1.0447	1.16125	0.958943	0.891852	1.00387	0.910725	0.978461	0.944593
C09180	1.0665e+08	3.0716e+06	2.98223e+06	1.22555e+08	2.86538e+06	1.21658e+08	1.2354e+08	2.88103e+06	1.3024e+08	1.37034e+08	2.90661e+07	8.30501e+07	7.6366e+07	0.974311	0.0374125	0.0384952	1.61773	0.0377265	1.70547	1.79444	0.380616	1.08753
C07063	458618	441304	444353	478033	2.75424e+07	511735	522550	4.589e+06	511545	452790	510005	481398	446455	1.06501	60.0599	38.5973	1.17044	10.2788	1.14579	1.01419	1.14234	1.07827
C04751	3.33108e+06	510635	460324	1.45486e+07	1.34134e+08	1.39435e+07	3.8643e+07	8.14586e+07	7.03974e+06	5.82793e+06	8.76432e+06	7.29613e+06	2.3032e+06	19.0253	62.1472	82.4391	16.7779	35.3675	3.0565	2.53036	3.80527	3.16782
C10959	353320	358416	344240	784444	538047	397758	437813	581827	417845	360949	445951	403450	351695	297.216	1.46455	93.1299	1.24486	1.65435	1.18809	1.02631	1.268	1.14716
C16994	1.97556e+06	1.72266e+06	1.65602e+06	2.31703e+06	2.86835e+06	2.41171e+06	2.47129e+06	2.48987e+06	2.40586e+06	2.12869e+06	2.50661e+06	2.31765e+06	1.81113e+06	1.27544	1.6104	1.47499	1.3645	1.37476	1.32837	1.17533	1.384	1.27967
C04102	1.21559e+06	613902	634921	1.44023e+06	612719	1.35983e+06	1.48983e+06	609569	1.55822e+06	1.38909e+06	1.4394e+06	1.41424e+06	939994	1.54239	0.649261	0.63031	1.58494	0.648482	1.65769	1.47776	1.53129	1.50452
C18801	771371	661006	556951	820166	955488	806818	672927	938547	697304	708003	744629	726316	688582	8.79674	1.66135	8.42517	0.977265	1.36301	1.01267	1.02821	1.0814	1.0548
C07007	6.27116e+07	1.20025e+06	1.2445e+06	5.44698e+07	1.04768e+08	5.861e+07	6.46861e+07	6.73253e+07	7.58966e+07	5.98767e+07	7.75831e+07	6.87299e+07	3.03041e+07	1.63074	2.36038	3.25091	2.13457	2.22166	2.5045	1.97586	2.56015	2.26801
C15556	8.6684e+07	1.70275e+08	1.69187e+08	8.7147e+07	1.60722e+08	8.68995e+07	8.33285e+07	1.63667e+08	7.85407e+07	1.24681e+08	7.40401e+07	9.93607e+07	1.38058e+08	0.685667	1.11575	1.23729	0.603578	1.1855	0.568899	0.903112	0.536299	0.719705
C11371	482174	443439	454381	490407	530099	488892	521767	704356	481771	735062	712509	723786	465139	1.05426	1.13293	1.12085	1.12175	1.51429	1.03576	1.58031	1.53182	1.55606
C06819	249620	240721	238213	279331	372328	289842	279415	265783	275178	279176	269354	274265	243093	1.27001	1.46624	1.22121	1.14942	1.09334	1.13199	1.14843	1.10803	1.12823
C16440	484583	466300	412049	517549	547997	541443	497944	533340	554504	548236	545192	546714	461106	1.13198	1.15142	1.20664	1.07989	1.15665	1.20255	1.18896	1.18236	1.18566
C04022	240645	268598	251077	277865	273021	286268	264732	295364	257360	274618	277730	276174	249292	1.1511	1.29646	1.26791	1.06194	1.18481	1.03237	1.10159	1.11407	1.10783
C16150	2.76795e+07	2.80957e+07	2.97592e+07	1.74242e+07	2.218e+07	2.5865e+07	2.52229e+07	2.90365e+07	2.66142e+07	2.87734e+07	2.87893e+07	2.87813e+07	2.80409e+07	0.91503	0.84096	0.865683	0.899504	1.0355	0.949121	1.02612	1.02669	1.02641
C19434	1.24465e+06	1.23404e+06	1.24778e+06	1.34158e+06	1.3251e+06	1.26328e+06	1.30738e+06	1.28771e+06	1.24551e+06	1.33646e+06	1.32523e+06	1.33085e+06	1.24222e+06	1.0363	1.07877	1.07241	1.05245	1.03662	1.00265	1.07587	1.06683	1.07135
C18934	189543	166297	170346	2.37727e+06	700984	1.1542e+06	2.20938e+06	1.51616e+06	3.76135e+06	3.91465e+06	1.66337e+06	2.78901e+06	179025	1.26718	12.3194	1.25914	12.3412	8.469	21.0102	21.8665	9.29125	15.5789
C04122	260036	201224	189235	6.16664e+07	6.44877e+07	3.48394e+07	6.44378e+07	2.73113e+07	5.38876e+07	4.00358e+07	7.30283e+07	5.6532e+07	222348	7.0157	576.51	2.08979	289.807	122.831	242.357	180.059	328.442	254.251
HMDB0013078	5.58976e+06	2.11886e+06	2.03157e+06	5.74093e+06	6.78151e+06	5.9864e+06	6.50369e+06	6.46848e+06	5.8919e+06	5.76675e+06	6.00173e+06	5.88424e+06	3.88212e+06	1.50281	1.80163	1.70119	1.67529	1.66622	1.5177	1.48546	1.54599	1.51573
C08362	849362	672740	681605	1.08456e+06	1.3418e+06	1.10366e+06	1.1685e+06	1.2646e+06	1.1502e+06	981646	1.15407e+06	1.06786e+06	766116	1.32943	1.75688	1.80043	1.52522	1.65067	1.50134	1.28133	1.50638	1.39386
C02923	558563	495405	417418	614690	687584	604686	501320	620248	522609	530627	558078	544353	511182	1.26922	1.49077	1.60592	0.980707	1.21336	1.02235	1.03804	1.09174	1.06489
C15545	6.22492e+06	371040	371262	9.24153e+06	666035	9.5986e+06	1.40985e+08	382949	1.01908e+08	9.72927e+06	1.24991e+07	1.11142e+07	3.47152e+06	3.08276	0.162288	0.201341	40.612	0.110312	29.3554	2.8026	3.60046	3.20153
C21247	597612	558459	566750	619588	1.65529e+08	604311	610788	3.44823e+07	607341	913315	600298	756807	584484	1.02824	32.9719	165.602	1.045	58.9961	1.03911	1.5626	1.02706	1.29483
C14853	7.07323e+06	7.45265e+06	7.58019e+06	7.76907e+06	7.94003e+06	8.75538e+06	8.97987e+06	9.28005e+06	1.65515e+08	7.85022e+06	9.99682e+06	8.92352e+06	7.36754e+06	0.855765	0.86217	1.1396	1.21884	1.25959	22.4655	1.06551	1.35687	1.21119
C08292	669044	815681	724571	836449	1.28531e+06	777957	722985	728970	713414	740342	740658	740500	731972	1.09654	1.06591	1.22476	0.987722	0.995899	0.974647	1.01144	1.01187	1.01165
C19994	2.39397e+06	1.12649e+06	1.14764e+06	2.94248e+06	8.19225e+06	2.78454e+06	3.10061e+06	3.43469e+06	3.16285e+06	2.46352e+06	2.80708e+06	2.6353e+06	1.74671e+06	1.63292	3.99842	4.6396	1.77512	1.96638	1.81075	1.41038	1.60707	1.50873
C02726	4.96376e+06	4.67172e+06	4.72373e+06	5.07885e+06	5.14284e+06	5.16212e+06	4.99199e+06	4.9852e+06	4.84523e+06	5.05945e+06	5.01694e+06	5.0382e+06	4.77573e+06	1.05268	1.06227	1.07086	1.04528	1.04386	1.01455	1.05941	1.05051	1.05496
C12150	613197	593980	585302	631659	655687	586966	580382	584365	632996	617954	609934	613944	605286	1.01332	1.0852	1.02358	0.958856	0.965436	1.04578	1.02093	1.00768	1.0143
C05239	1.8753e+06	1.53061e+06	1.50305e+06	2.14546e+06	2.89029e+06	2.26743e+06	2.25595e+06	2.49665e+06	2.42901e+06	1.98743e+06	2.3259e+06	2.15667e+06	1.69857e+06	1.26339	1.65966	1.53154	1.32815	1.46986	1.43003	1.17007	1.36933	1.2697
C12333	1.17695e+06	1.86527e+06	1.32912e+06	945359	843123	917232	1.76574e+06	2.2525e+06	2.23728e+06	929668	922044	925856	1.33422e+06	2.39162	2.04564	2.59695	1.32342	1.68825	1.67685	0.696787	0.691073	0.69393
C00786	2.76179e+06	2.83378e+06	2.85247e+06	2.83795e+06	2.69114e+06	2.78811e+06	2.74358e+06	2.68004e+06	2.77447e+06	2.81005e+06	2.79287e+06	2.80146e+06	2.79556e+06	1.00238	0.984482	0.994738	0.98141	0.95868	0.992458	1.00519	0.999041	1.00211
C19181	1.31979e+08	1.33011e+08	1.26607e+08	1.51192e+08	1.51948e+08	1.45507e+08	1.43644e+08	1.51898e+08	1.54954e+08	1.28334e+08	1.31975e+08	1.30154e+08	1.32106e+08	1.12237	1.11517	1.15055	1.08734	1.14982	1.17295	0.971444	0.999008	0.985226
C14333	2.35194e+07	1.50581e+08	3.1283e+07	2.88489e+07	4.24108e+07	3.86072e+07	3.01724e+07	3.36271e+07	3.23953e+07	2.38012e+07	3.23768e+07	2.8089e+07	5.5825e+07	0.698286	0.286659	0.638978	0.540482	0.602367	0.5803	0.426354	0.579969	0.503161
C10306	2.23024e+07	626127	609302	3.7286e+07	3.1744e+07	3.86135e+07	4.96023e+07	3.73684e+07	4.95512e+07	3.63315e+07	5.36642e+07	4.49978e+07	1.17521e+07	3.14645	2.50722	2.03757	4.22072	3.17972	4.21637	3.09149	4.56635	3.82892
C13812	2.55474e+07	3.07524e+06	3.02951e+06	5.55679e+07	3.70036e+06	4.78283e+07	7.89399e+07	3.32915e+06	8.01142e+07	3.76915e+07	6.79177e+07	5.28046e+07	1.38071e+07	4.37819	0.275314	0.262631	5.71734	0.241119	5.80239	2.72986	4.91904	3.82445
C09866	1.74791e+06	1.75564e+06	1.75552e+06	1.88876e+06	1.61045e+06	1.83898e+06	1.91426e+06	1.69302e+06	1.88626e+06	1.71267e+06	1.9101e+06	1.81138e+06	1.7528e+06	1.04911	0.933193	0.966593	1.09212	0.965894	1.07614	0.977103	1.08974	1.03342
C09311	733989	784063	835689	815816	801038	805754	822262	808471	785793	772724	779877	776300	768092	1.03639	1.15235	1.136	1.07053	1.05257	1.02305	1.00603	1.01534	1.01069
C02990	3.3727e+06	1.72882e+06	1.8362e+06	4.05137e+06	1.79542e+06	3.93265e+06	4.30863e+06	1.83664e+06	4.36268e+06	3.80516e+06	4.16277e+06	3.98396e+06	2.63782e+06	1.58955	0.686893	0.679942	1.63341	0.696273	1.6539	1.44254	1.57811	1.51033
C03059	4.43592e+06	4.3829e+06	4.49516e+06	4.56893e+06	4.33576e+06	4.55139e+06	4.4277e+06	4.09962e+06	4.31974e+06	4.32962e+06	4.42849e+06	4.37905e+06	4.42904e+06	1.01816	0.963188	1.01613	0.999699	0.925624	0.975322	0.977553	0.999876	0.988715
C19272	1.26692e+08	1.38163e+08	1.41512e+08	5.98938e+07	1.32335e+08	1.25789e+08	1.44381e+08	1.49841e+08	1.54919e+08	1.3092e+08	1.24158e+08	1.27539e+08	1.34737e+08	1.03112	1.08107	1.03248	1.07158	1.1121	1.14978	0.971667	0.921486	0.946576
C01598	2.6432e+06	3.41906e+06	2.5412e+06	6.17893e+07	2.07824e+07	5.90346e+07	6.70865e+07	1.40588e+07	7.54444e+07	3.70768e+07	6.70021e+07	5.20394e+07	7.68433e+06	6.72124	2.09415	2.58691	8.73029	1.82954	9.81796	4.82499	8.71931	6.77215
C13728	359481	398986	354056	441047	437689	442762	390384	405685	374227	395196	391997	393596	379552	1.17661	1.27243	1.27125	1.02854	1.06885	0.985969	1.04122	1.03279	1.037
C14422	547146	534762	504834	547139	591269	582979	578974	591933	567554	566832	564967	565900	528622	1.01507	1.09652	1.02416	1.09525	1.11977	1.07365	1.07228	1.06875	1.07052
C18236	2.24146e+06	2.42045e+06	2.54289e+06	2.64347e+06	2.50683e+06	2.80756e+06	3.52397e+06	3.41569e+06	3.0624e+06	2.72935e+06	2.78925e+06	2.7593e+06	2.38786e+06	1.19939	1.63802	1.52938	1.47579	1.43044	1.28249	1.14301	1.1681	1.15556
C08858	31364.7	33092.9	31033.6	38979.3	40928.7	36378.6	37167.1	36657.1	39945.7	41290.5	38663.4	39977	32827.9	1.17985	1.08331	1.18601	1.13218	1.11664	1.21682	1.25779	1.17776	1.21777
C07287	1.76986e+06	1.84078e+06	1.73385e+06	1.78512e+06	1.59112e+06	1.82126e+06	1.78712e+06	1.64609e+06	1.77979e+06	1.71992e+06	1.71327e+06	1.7166e+06	1.76192e+06	0.965313	0.906957	0.884717	1.0143	0.934261	1.01014	0.976165	0.972393	0.974279
C08966	1.51704e+06	1.59514e+06	1.54816e+06	1.62795e+06	1.91939e+06	1.62147e+06	1.55194e+06	1.72685e+06	1.57203e+06	1.57651e+06	1.48059e+06	1.52855e+06	1.55805e+06	1.00571	1.26552	1.20722	0.996079	1.10834	1.00897	1.01185	0.95028	0.981063
C10550	2.26167e+06	2.26864e+06	2.23512e+06	2.28412e+06	2.33835e+06	2.3457e+06	2.3982e+06	2.27386e+06	2.27363e+06	2.31023e+06	2.31093e+06	2.31058e+06	2.25834e+06	1.02864	1.00066	1.05559	1.06193	1.00687	1.00677	1.02298	1.02329	1.02313
C18261	2.16169e+06	2.30506e+06	2.30187e+06	1.25142e+07	4.19341e+07	1.17935e+07	4.95087e+06	1.99501e+07	4.85819e+06	3.85116e+06	4.48565e+06	4.1684e+06	2.18057e+06	6.70804	59.7033	54.7556	2.27044	9.149	2.22794	1.76612	2.0571	1.91161
C20441	447996	546184	485177	490284	524731	520924	484114	488122	477706	495737	480414	488075	490132	1.09553	1.06591	1.22476	0.987722	0.995899	0.974647	1.01144	0.980171	0.995803
C08369	7.20565e+07	4.57521e+07	4.3577e+07	1.98314e+07	2.07872e+07	1.89329e+07	1.35419e+08	2.06924e+07	1.92071e+07	1.36781e+08	1.35881e+08	1.36331e+08	4.53304e+07	0.403185	0.434356	3.02178	2.98737	0.456479	0.423713	3.01742	2.99756	3.00749
C03219	501287	387911	364800	649123	881782	632895	529035	5.11371e+06	541077	517350	612435	564892	428633	1.87234	1.84862	2.08979	1.23424	11.9303	1.26233	1.20698	1.42881	1.31789
C18557	3.65569e+06	3.45685e+06	3.33209e+06	3.81553e+06	3.48434e+06	3.81218e+06	3.75272e+06	3.42879e+06	3.89859e+06	3.62406e+06	3.75593e+06	3.68999e+06	3.46167e+06	1.04124	1.04141	1.0227	1.08408	0.990502	1.12622	1.04691	1.085	1.06596
C02395	2.03893e+06	812819	801479	6.66048e+06	811841	2.47185e+06	6.73018e+06	770606	5.1729e+06	3.31664e+06	7.18146e+06	5.24905e+06	1.43178e+06	4.2876	0.544063	0.581726	4.70056	0.538215	3.61291	2.31644	5.01575	3.66609
C09627	2.97798e+06	561054	601114	749893	579451	834485	1.10778e+06	567726	1.00476e+06	834389	1.18438e+07	6.33908e+06	1.78326e+06	0.401709	0.328382	0.325455	0.621209	0.318364	0.563438	0.467901	6.64164	3.55477
C07327	381324	338206	285248	419641	424405	412812	342245	387780	357824	362253	380992	371623	346316	1.21878	1.28406	1.28288	0.988244	1.11973	1.03323	1.04602	1.10013	1.07307
C14343	193940	190945	188956	3.55327e+07	7.67806e+07	3.44801e+07	2.43709e+07	1.2113e+07	1.95295e+07	1.78322e+07	2.13542e+07	1.95932e+07	191600	28.7335	732.184	8.63048	127.197	63.2202	101.929	93.0701	111.452	102.261
C16146	1.28929e+06	1.30185e+06	1.23953e+06	1.16074e+06	1.21537e+06	1.26773e+06	1.211e+06	1.16128e+06	1.14503e+06	1.32974e+06	1.17597e+06	1.25285e+06	1.26852e+06	0.852416	1.11813	1.00299	0.954662	0.915464	0.90265	1.04826	0.927042	0.987651
C04167	229838	221708	180741	2.63723e+07	2.28702e+07	2.14587e+07	2.05567e+07	2.84377e+07	5.78819e+06	7.27078e+06	3.79735e+06	5.53407e+06	218293	51.816	574.532	302.613	94.1703	130.273	26.5157	33.3075	17.3957	25.3516
C06551	886716	816911	663304	975817	1.09154e+06	962436	795843	1.36568e+08	3.95136e+06	842369	885946	864157	819278	1.25717	1.47661	1.59067	0.971396	166.693	4.82298	1.02818	1.08137	1.05478
C09591	448755	355541	322042	517726	626316	514030	465192	431045	426749	410305	453974	432139	389643	1.68553	1.64566	1.92224	1.19389	1.10626	1.09523	1.05303	1.1651	1.10906
C07124	1.04351e+07	778306	726841	2.11999e+07	654710	1.64928e+07	2.68596e+07	692525	2.3117e+07	1.19727e+07	8.01448e+06	9.99359e+06	4.14607e+06	4.42786	0.157641	0.158964	6.47833	0.167032	5.57564	2.88772	1.93303	2.41037
C04100	1.91668e+06	824446	846347	2.30002e+06	2.77183e+06	2.29248e+06	2.4271e+06	2.683e+06	2.42289e+06	2.12921e+06	2.30506e+06	2.21713e+06	1.38909e+06	1.60008	1.96332	1.99875	1.74727	1.93149	1.74424	1.53281	1.65941	1.59611
C07971	5.46547e+06	4.71254e+06	4.88816e+06	3.60852e+06	2.26534e+07	3.73905e+06	4.81589e+06	9.99536e+06	3.37731e+06	5.10056e+06	3.0024e+06	4.05148e+06	4.5874e+06	0.80725	0.500544	6.44103	1.04981	2.17887	0.736213	1.11186	0.654488	0.883175
C00408	481598	524291	550953	528092	514407	521647	549835	523995	516895	509943	518489	514216	509344	1.04507	1.16201	1.14551	1.0795	1.02876	1.01483	1.00117	1.01795	1.00956
C03861	2.68283e+06	2.69109e+06	2.65133e+06	2.75399e+06	2.77378e+06	2.79414e+06	2.84477e+06	2.69729e+06	2.74398e+06	2.74043e+06	2.74126e+06	2.74085e+06	2.666e+06	1.04337	1.00549	1.06069	1.06706	1.01173	1.02925	1.02792	1.02823	1.02807
C14213	442103	456594	497557	470849	480760	483590	474750	485221	471610	463766	473252	468509	459527	1.00665	1.0376	1.14739	1.03313	1.05591	1.02629	1.00922	1.02987	1.01955
C15145	1.02102e+07	2.57126e+06	2.48969e+06	1.82892e+07	2.67745e+06	1.74384e+07	2.04946e+07	2.66759e+06	1.99819e+07	1.2023e+07	2.11405e+07	1.65818e+07	6.43644e+06	2.93288	0.400334	0.412812	3.18416	0.414451	3.10449	1.86796	3.28451	2.57623
C14752	2.16419e+07	585132	582605	2.28139e+07	607676	2.29349e+07	1.68953e+07	603914	1.62683e+07	2.37723e+07	1.29954e+08	7.68629e+07	1.16457e+07	7.08839	0.0498953	0.0521262	1.45077	0.0518573	1.39693	2.04129	11.1589	6.60011
C09086	1.54259e+07	311361	312008	2.62729e+07	9.74587e+07	2.3614e+07	7.61709e+06	1.73085e+07	2.37665e+07	3.00553e+06	2.87179e+07	1.58617e+07	4.76531e+06	5.15148	20.9178	15.6662	1.59845	3.63219	4.98739	0.630711	6.02644	3.32858
C07040	387897	409036	365220	494336	507440	449370	474982	408556	458805	465967	410807	438387	389015	1.25312	1.23241	1.20566	1.22099	1.05023	1.1794	1.19781	1.05602	1.12691
C06820	980972	926838	942687	1.00827e+06	967127	1.03153e+06	1.03373e+06	929436	1.03457e+06	975587	988211	981899	948914	1.07957	1.01291	0.978284	1.08938	0.979473	1.09027	1.02811	1.04141	1.03476
C00256	1.79207e+07	2.28164e+07	2.61053e+07	3.00878e+07	1.1841e+08	1.17674e+08	3.09084e+07	2.80173e+07	1.20928e+08	2.91198e+07	1.28346e+08	7.87328e+07	2.09525e+07	1.38177	5.66065	1.46521	1.47516	1.33718	5.77155	1.3898	6.12556	3.75768
C07653	372465	295098	267294	4.19265e+07	454251	3.10095e+07	1.18488e+06	1.6288e+06	2.70645e+07	2.45827e+07	1.41511e+07	1.93669e+07	323403	10.4483	1.22558	1.45507	3.66381	5.03646	83.6868	76.0127	43.7568	59.8848
C15494	2.13803e+06	2.29275e+06	2.62191e+06	2.71906e+06	2.41137e+06	2.66732e+06	2.21929e+06	2.59356e+06	2.07185e+06	2.19822e+06	2.34408e+06	2.27115e+06	2.32947e+06	1.1556	1.03974	0.64453	0.952705	1.11337	0.88941	0.943657	1.00627	0.974964
C15152	841783	847810	852693	858909	862166	860867	914906	857382	867130	845840	873494	859667	845800	1.02476	0.995466	1.07525	1.08171	1.01369	1.02522	1.00005	1.03274	1.0164
C16566	9.58685e+07	2.90426e+06	2.95955e+06	1.02018e+08	2.90077e+06	1.02519e+08	1.04299e+08	2.76074e+06	1.05095e+08	1.18673e+08	1.03084e+08	1.10879e+08	5.18481e+07	1.29683	0.0557847	0.0573991	2.01162	0.0532467	2.02698	2.28887	1.98819	2.13853
C06469	684981	794367	786313	748629	774025	795062	679276	652573	712885	682833	717481	700157	747725	1.0786	0.972035	1.06379	0.908457	0.872744	0.953405	0.913214	0.959552	0.936383
C09724	772625	821696	842885	780267	808907	833958	806299	815760	809836	816165	831000	823583	816572	1.02047	0.991669	1.00379	0.987419	0.999005	0.99175	0.999502	1.01767	1.00858
C08497	1.16746e+06	1.12476e+06	998102	1.28477e+06	1.43713e+06	1.26716e+06	1.10051e+06	1.25227e+06	1.09551e+06	1.11408e+06	1.16645e+06	1.14026e+06	1.12217e+06	1.15156	1.35394	1.26256	0.980699	1.11594	0.976246	0.992789	1.03946	1.01612
C00633	349561	290088	258846	350453	431743	366447	314785	376208	323734	323906	339766	331836	314626	1.17575	1.45075	1.84118	1.00051	1.19573	1.02895	1.0295	1.0799	1.0547
C16527	5.37718e+06	2.46249e+06	2.56492e+06	6.45263e+06	7.77628e+06	6.32974e+06	6.73182e+06	7.38158e+06	6.79736e+06	5.97343e+06	6.46677e+06	6.2201e+06	3.98205e+06	1.56592	1.73098	1.95608	1.69054	1.85371	1.707	1.50009	1.62398	1.56204
C00380	407400	458657	469482	411010	446912	453891	362882	376787	340214	372906	403183	388044	439063	0.981025	0.955793	1.04602	0.826492	0.858161	0.774863	0.849321	0.918279	0.8838
C00299	435969	489414	495928	512426	516479	525108	505558	552807	497691	522990	523246	523118	467932	1.12912	1.16765	1.0696	1.08041	1.18138	1.0636	1.11766	1.11821	1.11793
C06499	1.40998e+06	1.43642e+06	1.42747e+06	1.44887e+06	1.37392e+06	1.42342e+06	1.40069e+06	1.36825e+06	1.41646e+06	1.4323e+06	1.42585e+06	1.42908e+06	1.41509e+06	1.01097	0.99292	0.969124	0.989822	0.966898	1.00096	1.01216	1.0076	1.00988
C14758	2.81266e+06	1.0554e+06	1.00452e+06	2.86716e+06	3.25563e+06	2.89805e+06	3.3095e+06	3.27058e+06	2.9922e+06	2.97947e+06	3.03869e+06	3.00908e+06	1.93534e+06	1.4698	1.76205	1.68365	1.71003	1.68992	1.54608	1.5395	1.5701	1.5548
C10511	4.6007e+06	3.55836e+06	3.04591e+06	4.11274e+07	2.3096e+06	3.12328e+06	2.30611e+06	3.06057e+06	2.912e+06	2.79244e+06	3.12674e+06	2.95959e+06	3.71269e+06	0.64664	0.665511	31.5961	0.621142	0.824354	0.784337	0.752135	0.842178	0.797157
C12835	1.86257e+07	5.19345e+07	5.00837e+07	1.70119e+07	3.80569e+06	1.52333e+07	8.43845e+06	1.33469e+06	1.15127e+07	1.20162e+07	7.91246e+06	9.9643e+06	3.42422e+07	0.464963	0.112065	0.134026	0.246434	0.0389779	0.336215	0.350917	0.231073	0.290995
C14428	843507	780373	810555	838922	819114	861662	824438	863553	796847	815835	868228	842032	817530	1.05038	1.07044	1.11135	1.00845	1.05629	0.9747	0.997926	1.06201	1.02997
C11334	250955	246493	258013	259760	263959	264930	265765	253114	260530	261480	255767	258623	251192	1.0284	1.01852	1.02837	1.05801	1.00765	1.03717	1.04095	1.01821	1.02958
C07641	1.64295e+07	1.99609e+07	1.86589e+07	3.07808e+07	3.75483e+07	3.20108e+07	2.74e+07	4.54309e+07	2.82388e+07	2.03973e+07	2.28927e+07	2.1645e+07	1.85351e+07	1.40842	2.84553	1.5212	1.47827	2.45107	1.52353	1.10046	1.2351	1.16778
C17954	1.91711e+06	50768.7	57942.4	4.96575e+06	46200.4	3.71528e+06	122062	48532.5	7.16125e+06	3.54802e+06	1.14344e+07	7.49121e+06	928338	6.7242	0.0538553	0.0541373	0.131485	0.052279	7.71406	3.82191	12.3171	8.06949
C18750	331100	369560	345453	384722	375645	402139	364241	413949	360622	377843	382124	379983	344858	1.20622	1.28946	1.26107	1.05621	1.20035	1.04571	1.09565	1.10806	1.10185
C00253	387936	447964	409660	424556	456869	451088	419213	423462	413664	429278	416009	422643	415557	1.11891	1.10844	1.20825	1.0088	1.01902	0.995445	1.03302	1.00109	1.01705
C19137	576257	584568	561448	647270	877543	682767	721591	983401	708118	682086	729570	705828	577179	1.2607	1.69354	1.58122	1.2502	1.70381	1.22686	1.18176	1.26403	1.22289
C02126	4.60705e+07	1.63211e+07	6.38742e+07	1.50527e+06	1.12523e+08	5.15537e+07	2.94663e+06	9.79621e+07	9.80222e+07	1.73274e+06	3.34963e+07	1.76145e+07	4.20658e+07	2.4324	0.0563822	2.36441	0.0700481	2.32878	2.33021	0.0411912	0.796282	0.418736
C06837	7.81331e+07	7.63568e+07	7.40822e+07	8.34045e+07	8.15582e+07	1.04289e+08	9.0437e+07	1.00937e+08	7.52774e+07	8.09068e+07	7.26136e+07	7.67602e+07	7.84149e+07	1.17609	0.941958	1.10911	1.15331	1.28722	0.959989	1.03178	0.926018	0.978898
C14788	1.1194e+06	1.33677e+06	1.17205e+06	1.27066e+06	1.77447e+06	2.32451e+06	1.54003e+06	1.83305e+06	1.58714e+06	1.66734e+06	1.61059e+06	1.63897e+06	1.3186e+06	1.50838	0.87222	0.911227	1.16792	1.39014	1.20365	1.26448	1.22144	1.24296
C11584	2.17158e+06	2.20602e+06	2.22647e+06	2.4388e+06	1.94888e+06	2.40408e+06	2.29893e+06	2.0556e+06	2.30847e+06	2.1831e+06	2.31907e+06	2.25108e+06	2.2023e+06	1.05369	0.905843	0.892893	1.04388	0.933389	1.04821	0.99128	1.05302	1.02215
C15214	7.17359e+07	7.41206e+07	1.04297e+08	1.06327e+08	1.02953e+08	1.07663e+08	1.05151e+08	9.97679e+07	7.72122e+07	8.37943e+07	1.0057e+08	9.21822e+07	8.83152e+07	0.863275	1.13146	0.364269	1.19063	1.12968	0.87428	0.948809	1.13876	1.04379
C07263	379283	336396	283721	417395	422133	411671	340413	385704	355909	360314	378953	369633	344462	1.21878	1.28406	1.28288	0.988244	1.11973	1.03323	1.04602	1.10013	1.07307
C17958	1.39739e+06	527109	545172	8.70419e+06	8.79905e+06	6.96845e+06	7.82397e+06	1.0896e+07	5.59712e+07	4.23674e+07	6.05929e+07	5.14802e+07	4.33525e+06	2.23711	1.67388	1.39705	1.80473	2.51334	12.9107	9.77278	13.9768	11.8748
C16993	3.21701e+06	3.20925e+06	3.17302e+06	3.03178e+06	3.38731e+06	3.16321e+06	3.3021e+06	3.32433e+06	3.01225e+06	3.08121e+06	2.97776e+06	3.02949e+06	3.19855e+06	0.923102	1.09514	1.04383	1.03237	1.03932	0.941755	0.963314	0.930972	0.947143
C09948	542235	506538	517569	1.00178e+06	579808	763728	1.88382e+06	534583	794036	531392	878389	704891	530564	1.83399	1.09476	1.06377	3.5506	1.00758	1.49659	1.00156	1.65557	1.32857
C00747	468314	415360	350321	515373	549030	508305	420320	476243	439453	444892	467907	456400	425320	1.21878	1.28406	1.28288	0.988244	1.11973	1.03323	1.04602	1.10013	1.07307
C14396	767424	221020	205958	637491	196435	672038	568146	186825	550700	529230	721912	625571	420201	1.2228	0.518624	0.487485	1.35208	0.444609	1.31057	1.25947	1.71802	1.48874
C14533	1.0543e+06	413015	392824	1.01893e+06	414357	1.44517e+06	1.05128e+06	393993	1.08193e+06	1.05068e+06	993945	1.02231e+06	713851	1.51971	0.578627	0.526581	1.47268	0.551925	1.51563	1.47185	1.39237	1.43211
C12367	1.01858e+06	1.07288e+06	1.02626e+06	1.06368e+06	1.01925e+06	1.04592e+06	1.04426e+06	999333	1.01545e+06	1.03046e+06	1.0234e+06	1.02693e+06	1.03801e+06	0.993962	0.968023	0.98686	1.00602	0.962736	0.978259	0.992725	0.985921	0.989323
C03019	767442	826346	832160	842431	712207	777182	884056	744390	814986	800193	783706	791949	803620	0.978954	0.871017	0.84511	1.10009	0.926296	1.01414	0.995735	0.97522	0.985478
C09563	7.49092e+07	401871	406708	1.0974e+07	413280	1.47287e+07	1.05072e+07	437681	1.08073e+07	1.95967e+07	1.34971e+07	1.65469e+07	3.93933e+07	0.561926	0.0109616	0.0104183	0.266725	0.0111105	0.274343	0.497462	0.342624	0.420043
C03691	4.85896e+06	5.05933e+06	1.88981e+06	4.23472e+06	5.08203e+06	6.33437e+06	2.46201e+06	3.44007e+06	4.52905e+06	1.89315e+06	2.15725e+06	2.0252e+06	3.56799e+06	1.34613	1.37724	1.37395	0.690028	0.964149	1.26936	0.530593	0.604613	0.567603
C01185	2.68063e+06	2.93174e+06	2.85446e+06	2.88688e+06	2.70092e+06	2.88511e+06	2.50693e+06	2.45769e+06	2.62439e+06	2.49603e+06	2.63807e+06	2.56705e+06	2.72238e+06	1.02946	1.05082	1.11513	0.920859	0.90277	0.964005	0.916854	0.96903	0.942942
C11769	4.45703e+07	9.34089e+07	9.39604e+07	3.69044e+07	4.0271e+07	3.85831e+07	3.16689e+07	3.21656e+07	3.54137e+07	3.7571e+07	3.15638e+07	3.45674e+07	6.85328e+07	0.554802	0.661503	0.462763	0.462098	0.469346	0.516741	0.54822	0.460564	0.504392
C11960	2.50805e+07	6.217e+07	6.11811e+07	4.68375e+07	5.99711e+07	1.55689e+07	2.15742e+07	5.90592e+07	4.06975e+07	3.78761e+07	3.17078e+07	3.4792e+07	4.69048e+07	0.344065	1.44562	1.41851	0.459957	1.25913	0.867661	0.807511	0.676004	0.741757
C02927	9.04073e+06	2.98127e+06	3.32449e+06	6.54079e+06	1.2012e+06	2.47331e+06	6.8819e+06	1.29278e+06	1.03647e+06	1.13445e+07	1.27689e+06	6.31067e+06	4.36425e+06	0.537262	0.516685	0.524164	1.57688	0.29622	0.23749	2.59941	0.292581	1.44599
C08810	3.44671e+07	266830	249644	244844	269704	248625	277174	225774	9.99436e+07	6.26315e+07	290726	3.14611e+07	1.4397e+07	0.0176776	0.0155617	0.0166052	0.0192522	0.0156821	6.942	4.35033	0.0201936	2.18526
C03017	332111	380329	327099	407466	404364	415611	366559	374796	355664	365106	362151	363628	353584	1.26326	1.153	1.25683	1.0367	1.05999	1.00588	1.03259	1.02423	1.02841
C11709	352108	364027	366124	362855	370191	368679	392836	362802	360308	363181	369256	366219	360831	1.03139	0.996766	0.936005	1.0887	1.00546	0.998549	1.00651	1.02335	1.01493
C14441	182614	178137	184880	194104	189906	195127	191559	181216	182994	184936	185811	185374	182309	1.04753	1.02777	1.03305	1.05074	0.994001	1.00375	1.01441	1.01921	1.01681
C18615	383943	370256	366398	566846	590720	445808	2.85347e+06	1.48656e+06	2.65185e+06	484291	1.68461e+06	1.08445e+06	376323	1.26184	2.80051	1.21335	7.58252	3.95022	7.04673	1.2869	4.47649	2.8817
C19530	837120	912745	900191	932575	1.06678e+06	881459	899599	852169	847171	859597	840057	849827	882790	1.01681	1.26506	1.10112	1.01904	0.965314	0.959652	0.973728	0.951593	0.96266
C07002	1.09798e+06	1.15372e+06	1.11949e+06	1.15482e+06	1.03973e+06	1.12666e+06	1.10898e+06	1.09121e+06	1.11221e+06	1.13228e+06	1.10785e+06	1.12007e+06	1.11982e+06	1.01541	0.889575	0.876841	0.990321	0.974453	0.993207	1.01113	0.989314	1.00022
C16185	128773	131749	142105	146418	144206	134197	140783	137788	131787	139133	130023	134578	135186	1.05099	1.24489	1.1167	1.04141	1.01925	0.97486	1.0292	0.96181	0.995507
C03124	1.70022e+06	1.79098e+06	1.79577e+06	1.95601e+06	1.90287e+06	2.07742e+06	2.13652e+06	2.9117e+06	2.09663e+06	2.01955e+06	2.16015e+06	2.08985e+06	1.75583e+06	1.20693	1.64831	1.53899	1.21681	1.6583	1.19409	1.1502	1.23027	1.19023
C00740	1.2984e+06	1.38905e+06	1.32815e+06	1.31612e+06	1.2484e+06	1.34635e+06	1.19952e+06	1.14895e+06	1.18569e+06	1.28413e+06	1.16578e+06	1.22495e+06	1.34646e+06	1.0082	0.883867	1.05692	0.890864	0.85331	0.880599	0.953707	0.865806	0.909756
C00483	2.74499e+06	2.77628e+06	2.84739e+06	2.63051e+06	2.73604e+06	2.86711e+06	2.39746e+06	2.59684e+06	2.44409e+06	2.60651e+06	2.44678e+06	2.52664e+06	2.77684e+06	1.02867	0.91873	1.02431	0.863377	0.935178	0.88017	0.938658	0.881136	0.909897
C02633	516043	513572	494618	529582	592281	531027	547418	566687	549065	523402	563717	543559	511484	1.1068	1.13859	1.15268	1.07025	1.10793	1.07347	1.0233	1.10212	1.06271
C06861	749463	1.87981e+06	5.88111e+06	913259	706373	848203	860883	4.64267e+07	800695	809023	868422	838723	2.3231e+06	0.349466	0.320847	0.303253	0.370575	19.9848	0.344667	0.348252	0.373821	0.361036
C01210	8.66177e+06	412267	302456	244645	258475	247699	251761	259586	246338	239473	252567	246020	2.41773e+06	0.0990754	0.108338	0.104464	0.104131	0.107367	0.101888	0.0990486	0.104465	0.101757
C11309	4.55251e+06	4.59475e+06	4.37408e+06	5.06836e+06	4.8718e+06	4.75868e+06	5.19605e+06	4.44638e+06	5.80476e+06	4.84596e+06	5.46319e+06	5.15457e+06	4.51106e+06	1.19019	1.05829	1.02287	1.15185	0.985663	1.28678	1.07424	1.21107	1.14265
C19400	244466	221327	192244	282819	285238	278941	222549	252588	241157	240941	256772	248856	228563	1.24458	1.31124	1.31003	0.973688	1.10511	1.0551	1.05415	1.12342	1.08879
C03882	1.59321e+06	1.49062e+06	1.53172e+06	1.43435e+06	1.65683e+06	1.56656e+06	1.49647e+06	1.43502e+06	1.41494e+06	1.64319e+06	1.45317e+06	1.54818e+06	1.53801e+06	0.86878	1.13959	1.06191	0.972989	0.933039	0.919979	1.06839	0.944839	1.00661
C06002	376582	297872	267986	395059	480408	404678	328521	497150	335488	335757	372244	354001	327770	1.37715	1.75411	2.11329	1.00229	1.51676	1.02354	1.02437	1.13568	1.08003
C12599	65417.9	58962	52182.7	62809.6	70668.9	66841.7	61008.7	70332.4	74547.7	67901	72454	70177.5	60021.1	1.16093	1.16559	1.17098	1.01645	1.1718	1.24203	1.13129	1.20714	1.16921
C06385	443317	429350	348618	512868	517255	505835	403574	458046	437318	436925	465633	451279	421477	1.22391	1.28947	1.28828	0.957521	1.08676	1.03758	1.03665	1.10476	1.07071
C07272	3.98731e+07	3.25637e+07	2.84267e+07	1.74689e+07	1.88858e+07	8.13987e+07	8.64681e+07	8.19273e+07	8.45771e+07	1.59868e+07	8.85309e+07	5.22588e+07	3.52192e+07	2.41014	0.386558	2.43626	2.45514	2.32621	2.40145	0.453923	2.51371	1.48382
C15571	819484	879966	840369	888040	800202	902271	884571	786599	922815	872976	877283	875130	847092	1.02217	1.05254	0.953352	1.04424	0.928587	1.08939	1.03056	1.03564	1.0331
C08719	2.15958e+06	2.17962e+06	2.07494e+06	2.40429e+06	2.22418e+06	2.25738e+06	2.46486e+06	2.05619e+06	2.75361e+06	2.1268e+06	2.59158e+06	2.35919e+06	2.11799e+06	1.20251	1.05178	1.02428	1.16377	0.970821	1.30011	1.00416	1.2236	1.11388
C03154	723282	713611	723773	754612	660543	747286	727015	714589	709145	721096	751123	736109	718070	1.06143	0.959026	0.945273	1.01246	0.995152	0.987571	1.00421	1.04603	1.02512
C02078	1.58366e+06	1.28469e+06	1.26559e+06	1.77061e+07	1.50812e+06	1.33209e+07	1.61719e+07	1.39076e+06	1.85027e+07	5.08231e+06	1.23046e+07	8.69346e+06	2.1674e+06	3.88622	0.695621	0.698921	7.4614	0.641673	8.5368	2.34488	5.67711	4.011
C06055	8.53789e+06	8.19043e+06	8.38994e+06	8.25481e+06	8.61002e+06	8.08865e+06	8.46585e+06	8.32485e+06	8.59627e+06	8.35495e+06	8.16014e+06	8.25754e+06	8.32566e+06	0.981856	0.993241	0.992033	1.01684	0.999903	1.0325	1.00352	0.980119	0.991819
C11085	308070	303313	300153	346034	469139	348963	381742	482602	361563	316814	382227	349521	304353	1.27813	1.47562	1.18461	1.25427	1.58566	1.18797	1.04094	1.25587	1.1484
C02066	2.69511e+07	2.87283e+07	2.91813e+07	2.13864e+07	2.38066e+07	2.52492e+07	2.7725e+07	2.67168e+07	2.62053e+07	2.74482e+07	2.7292e+07	2.73701e+07	2.8131e+07	0.821335	0.766432	0.874413	0.985566	0.949729	0.931544	0.975727	0.970175	0.972951
C14291	256935	243576	245805	271056	1.13057e+06	280569	318378	439566	301549	749107	318783	533945	250355	1.12999	3.82947	1.16104	1.27171	1.75577	1.20448	2.99218	1.27332	2.13275
C14179	3.722e+06	3.57052e+06	3.6575e+06	3.59859e+06	3.75344e+06	3.52615e+06	3.50334e+06	3.62912e+06	3.74744e+06	3.64224e+06	3.55732e+06	3.59978e+06	3.62948e+06	0.981856	0.946534	0.992033	0.965246	0.999903	1.0325	1.00352	0.980119	0.991819
C08021	1.85847e+07	1.66295e+07	1.50619e+07	2.64317e+07	4.107e+07	3.44469e+06	2.84684e+07	2.69246e+07	2.91839e+07	2.37547e+07	2.46657e+07	2.42102e+07	1.69624e+07	1.45398	2.07304	1.8578	1.67832	1.58731	1.7205	1.40043	1.45414	1.42728
C01169	205930	202750	200638	850668	2.74122e+06	535775	985311	560743	584070	311518	1.08862e+06	700071	203446	1.27813	24.4634	1.18461	4.84312	2.75623	2.87089	1.53121	5.35093	3.44107
C00170	3.48357e+06	3.32924e+06	4.71154e+06	7.92592e+06	5.53327e+06	7.97509e+06	1.20289e+06	5.13826e+06	5.54228e+06	3.00232e+06	2.17354e+06	2.58793e+06	3.43614e+06	0.482208	0.181408	1.845	0.350071	1.49536	1.61294	0.873748	0.632552	0.75315
C14302	416464	422471	405761	439353	634205	468844	516057	685810	492521	425457	525650	475553	414549	1.26855	1.46455	1.17572	1.24486	1.65435	1.18809	1.02631	1.268	1.14716
C18488	5.20859e+06	1.63943e+06	1.70978e+06	6.05078e+06	5.7795e+06	6.30702e+06	5.98792e+06	5.74056e+06	6.10819e+06	5.69275e+06	5.94159e+06	5.81717e+06	3.41903e+06	1.78445	1.76606	1.64485	1.75135	1.67901	1.78653	1.66502	1.7378	1.70141
C05775	244897	232163	234288	293417	1.32464e+06	525598	359508	403283	322690	250185	303847	277016	238626	1.12999	20.95	1.16104	1.50658	1.69002	1.35229	1.04844	1.27332	1.16088
C11804	1.01546e+06	814708	792815	1.15276e+06	1.78291e+06	1.18667e+06	1.25514e+06	2.36375e+06	1.23664e+06	1.1171e+06	1.3524e+06	1.23475e+06	903962	1.30238	1.93177	1.57513	1.38849	2.61487	1.36802	1.23578	1.49608	1.36593
C08363	854053	766370	742974	906151	1.04588e+06	895843	917790	2.74623e+06	896930	838358	872481	855420	801280	1.09338	1.21898	1.23051	1.1454	3.42731	1.11937	1.04627	1.08886	1.06757
C11292	1.76377e+06	758721	760296	2.08226e+06	2.55086e+06	2.11501e+06	2.60225e+06	2.46911e+06	2.19041e+06	2.03755e+06	2.21309e+06	2.12532e+06	1.2492e+06	1.74507	2.09296	1.99219	2.08313	1.97655	1.75344	1.63108	1.7716	1.70134
C19429	7.51437e+06	5.81473e+06	5.79225e+06	1.0729e+07	1.477e+07	1.19555e+07	1.14052e+07	1.07947e+07	1.07351e+07	6.95591e+06	9.3359e+06	8.14591e+06	5.42673e+06	1.9751	2.39808	2.41367	2.10167	1.98917	1.97818	1.28179	1.72035	1.50107
C00753	4.12115e+07	2.68686e+07	2.50317e+07	7.75259e+07	7.4879e+07	7.58852e+07	7.67553e+07	7.78502e+07	7.6749e+07	7.70203e+07	7.6269e+07	7.66446e+07	3.31823e+07	2.33923	2.36383	2.3496	2.31314	2.34613	2.31295	2.32112	2.29848	2.3098
C21542	1.76269e+06	1.86445e+06	1.83844e+06	2.03286e+06	2.28067e+07	2.12376e+06	2.30641e+06	1.76762e+06	1.97918e+06	1.86214e+06	2.11275e+06	1.98745e+06	1.78314e+06	1.18954	39.1757	11.792	1.29346	0.9913	1.10994	1.04431	1.18485	1.11458
C18760	1.14344e+06	913744	838990	1.49289e+06	9.83383e+06	1.45557e+06	6.4973e+06	1.61233e+06	4.40154e+06	1.20562e+06	3.73379e+06	2.4697e+06	1.00754e+06	1.60661	8.44744	2.08747	6.44868	1.60026	4.3686	1.19659	3.70584	2.45122
C14512	185966	91151.7	104282	203600	94804.7	212951	236716	107060	236178	223092	241367	232230	146238	1.54346	0.701276	0.68862	1.6187	0.73209	1.61502	1.52554	1.65051	1.58802
C00490	303767	348830	299182	392629	369853	380141	335274	342809	329083	333946	347665	340806	323647	1.26232	1.15215	1.25589	1.03593	1.05921	1.0168	1.03182	1.07421	1.05302
C18053	3.51139e+06	3.48806e+06	3.48782e+06	3.75252e+06	3.38055e+06	3.65363e+06	3.93962e+06	3.59955e+06	3.99395e+06	3.58999e+06	3.89049e+06	3.74024e+06	3.51469e+06	1.03948	0.924623	0.976319	1.1209	1.02415	1.13636	1.02143	1.10692	1.06418
C06693	514669	223491	223955	599730	751387	621445	657939	727308	629380	534539	594334	564436	359014	1.67443	2.07682	2.04188	1.83263	2.02585	1.75308	1.48891	1.65546	1.57219
C07100	7.65466e+07	838947	508365	5.72706e+06	652844	4.87033e+06	5.16878e+06	807333	5.80522e+06	4.94418e+06	5.46609e+06	5.20513e+06	1.96588e+07	0.236848	0.233557	0.0634453	0.262924	0.0410672	0.295298	0.251499	0.278048	0.264773
C17948	1.79947e+07	1.63635e+07	1.28707e+07	1.67625e+07	1.54728e+07	1.6737e+07	1.84519e+07	4.78916e+07	1.69159e+07	7.15192e+07	1.40629e+07	4.2791e+07	1.56668e+07	1.0601	1.12617	1.09451	1.17777	3.05689	1.07973	4.56503	0.897625	2.73133
C14689	699695	670964	701939	724693	714336	734569	766392	747293	700631	882947	745591	814269	689803	1.00062	1.02817	1.08996	1.11103	1.08334	1.0157	1.28	1.08088	1.18044
C06574	960609	1.16151e+06	1.11064e+06	1.13235e+06	1.11589e+06	1.15776e+06	1.02951e+06	1.03804e+06	1.01589e+06	1.05423e+06	1.03067e+06	1.04245e+06	1.06401e+06	1.0732	1.04418	1.19979	0.967583	0.975593	0.954774	0.990813	0.968666	0.979739
C08183	1.0009e+06	965736	911508	954333	6.12486e+07	981426	1.05365e+06	1.00405e+07	955289	900365	976084	938225	954062	1.01448	58.4892	53.3045	1.10438	10.524	1.00129	0.943717	1.02308	0.9834
C18877	2.68498e+06	2.47571e+06	2.17506e+06	2.91877e+06	3.17024e+06	2.93562e+06	2.91545e+06	2.85243e+06	2.87727e+06	2.81902e+06	2.84491e+06	2.83197e+06	2.46502e+06	1.30264	1.17518	1.33231	1.18273	1.15716	1.16724	1.14361	1.15411	1.14886
C03218	3.26054e+06	3.44799e+06	3.23976e+06	3.27117e+06	3.54559e+06	3.14532e+06	3.37155e+06	3.39425e+06	3.1463e+06	3.01774e+06	3.0404e+06	3.02907e+06	3.30261e+06	0.947655	1.09129	1.0322	1.02088	1.02775	0.952672	0.913746	0.920605	0.917176
C20552	724140	747353	741539	745138	738999	744731	770954	733798	767761	760397	752613	756505	736275	1.05022	0.991551	0.984081	1.0471	0.996636	1.04276	1.03276	1.02219	1.02748
C06080	671961	643910	643819	807273	873062	771143	780031	805220	762152	693243	758877	726060	656491	1.17677	1.26696	1.23785	1.18818	1.22655	1.16095	1.05598	1.15596	1.10597
C17980	5.4272e+07	2.6095e+06	2.53358e+06	5.86841e+07	2.4343e+06	5.85193e+07	5.60468e+07	2.4476e+06	5.96547e+07	6.8357e+07	1.38541e+07	4.11056e+07	3.00388e+07	1.66495	0.0808029	0.0831413	1.86582	0.0814812	1.98592	2.27563	0.461208	1.36842
C00153	417777	386369	330588	428356	460827	435792	440692	448501	466298	415090	458468	436779	386051	1.13522	1.17184	1.21198	1.14154	1.16177	1.20787	1.07522	1.18758	1.1314
C00170	2.07498e+06	2.26936e+06	2.20954e+06	2.23463e+06	2.09068e+06	2.23326e+06	1.94052e+06	1.90241e+06	2.03145e+06	1.93208e+06	2.04204e+06	1.98706e+06	2.1073e+06	1.02823	1.05082	1.11023	0.920859	0.90277	0.964005	0.916854	0.96903	0.942942
C03032	1.69504e+06	1.70698e+06	1.68546e+06	1.73741e+06	1.7232e+06	1.74969e+06	1.78396e+06	1.71057e+06	1.75166e+06	1.71793e+06	1.69377e+06	1.70585e+06	1.69921e+06	1.0425	1.02283	1.05616	1.04987	1.00669	1.03086	1.01102	0.996799	1.00391
C07997	394315	373867	335293	421140	445916	418046	405187	992648	451210	446110	443633	444872	382343	1.09448	1.34527	1.27414	1.05975	2.59622	1.18012	1.16678	1.1603	1.16354
C15700	1.68348e+06	1.3675e+06	1.50753e+06	1.84348e+06	2.5886e+06	2.0355e+06	2.00967e+06	2.12349e+06	2.18055e+06	1.78415e+06	1.97256e+06	1.87835e+06	1.53789e+06	1.23607	1.62403	1.51854	1.30678	1.38078	1.41789	1.16013	1.28264	1.22139
C03626	236488	183002	172099	306232	415992	298576	238950	1.47749e+06	237440	244066	268738	256402	202213	1.75727	1.84862	2.08979	1.18167	7.30663	1.17421	1.20698	1.32899	1.26798
C06807	2.3626e+06	724437	713663	2.42656e+06	729072	1.743e+06	2.28234e+06	650033	3.47575e+07	1.38763e+07	3.19892e+06	8.53762e+06	1.55664e+06	6.73876	0.449405	0.438114	1.46619	0.417588	22.3286	8.91428	2.05501	5.48465
C08512	2.01701e+06	2.12469e+06	2.20077e+06	2.32046e+06	2.52257e+06	2.4645e+06	2.53461e+06	3.45422e+06	2.48728e+06	2.39585e+06	2.56263e+06	2.47924e+06	2.10059e+06	1.19682	1.6345	1.52609	1.20662	1.64441	1.18409	1.14056	1.21996	1.18026
C21289	450536	434474	429948	504161	672009	523131	546818	691293	517913	503880	547513	525697	438754	1.27001	1.46624	1.22121	1.2463	1.57558	1.18042	1.14843	1.24788	1.19816
C11715	1.29292e+06	1.29448e+06	1.33637e+06	1.39732e+06	1.17147e+06	1.44256e+06	1.32286e+06	1.24041e+06	1.35092e+06	1.34431e+06	1.34614e+06	1.34523e+06	1.32509e+06	1.03467	0.949368	1.01856	0.998315	0.936096	1.0195	1.01451	1.01588	1.0152
C06255	1.44383e+06	1.48947e+06	1.46734e+06	1.47112e+06	1.30564e+06	1.44373e+06	1.44358e+06	1.3236e+06	1.44295e+06	1.39001e+06	1.37102e+06	1.38052e+06	1.435e+06	1.01312	0.887237	0.892637	1.00598	0.922373	1.00554	0.968651	0.955418	0.962035
C02646	894501	938487	911184	1.14182e+06	871831	1.33711e+06	1.04569e+06	880261	937160	850618	859347	854983	917942	2.07532	0.950968	0.913854	1.13916	0.95895	1.02094	0.926658	0.936167	0.931413
C00505	8.91318e+06	2.60898e+06	2.83884e+06	1.05554e+07	1.16419e+07	1.10024e+07	1.23191e+07	1.1357e+07	1.1518e+07	1.00625e+07	1.06598e+07	1.03612e+07	5.94413e+06	1.79054	1.95032	1.88212	2.07249	1.91062	1.93771	1.69284	1.79334	1.74309
C02218	557210	609407	593343	600081	561427	599713	521104	472436	545519	517916	548363	533140	557203	1.04426	1.0672	1.08199	0.935213	0.847869	0.979031	0.929492	0.984135	0.956814
C14860	3.12572e+06	3.02033e+06	3.27628e+06	3.27377e+06	3.36055e+06	3.29266e+06	3.42367e+06	3.36922e+06	3.22722e+06	3.94435e+06	3.33075e+06	3.63755e+06	3.12241e+06	1.048	1.0485	1.07569	1.09649	1.07905	1.03357	1.26324	1.06673	1.16498
C09275	872253	869033	885837	914386	7.57495e+06	880741	995242	1.76945e+07	923410	885587	969136	927361	882261	1.04231	15.5369	3.50613	1.12806	20.0559	1.04664	1.00377	1.09847	1.05112
C11061	4.25139e+07	3.48011e+06	3.37887e+06	4.5469e+07	3.37882e+06	3.48298e+07	4.42947e+07	3.2642e+06	4.55878e+07	4.88205e+07	1.06159e+07	2.97182e+07	2.34282e+07	1.63186	0.138367	0.142166	1.89066	0.139328	1.94585	2.08383	0.453126	1.26848
C07148	1.49253e+06	1.82287e+06	1.37565e+06	2.15437e+06	2.3733e+06	2.06838e+06	4.34076e+07	2.00727e+07	1.77999e+06	1.67565e+06	1.86977e+06	1.77271e+06	1.52044e+06	14.9155	1.21766	1.38283	28.5494	13.2019	1.17071	1.10208	1.22975	1.16592
C11165	503553	520058	571270	536295	547583	550806	540737	552664	537161	528227	539032	533630	524538	1.00447	1.03534	1.1449	1.03088	1.05362	1.02407	1.00703	1.02763	1.01733
C05851	331856	268812	245735	332703	409876	346822	289325	357154	283896	284108	311006	297557	297045	1.14757	1.45879	1.36033	0.974013	1.20236	0.955736	0.956449	1.047	1.00173
C15656	358576	368812	408259	398551	375817	393635	373399	382822	383884	377499	374539	376019	368099	1.05648	1.1747	1.15802	1.0144	1.04	1.04288	1.02554	1.01749	1.02152
C17391	2.06616e+06	1.32787e+06	1.34997e+06	3.27055e+06	1.59673e+07	2.9062e+06	3.61101e+06	1.10672e+07	3.51168e+06	2.74566e+06	3.78022e+06	3.26294e+06	1.71601e+06	1.77761	9.60398	8.72851	2.1043	6.44937	2.04642	1.60002	2.20291	1.90147
C10928	510454	483726	472591	521460	554129	556207	520654	519177	499222	510127	503895	507011	491792	1.10144	1.09663	1.07227	1.05869	1.05568	1.01511	1.03728	1.02461	1.03095
C12154	2.52507e+06	372121	352189	1.75451e+06	2.03514e+07	2.18298e+06	948023	3.72298e+06	1.12302e+07	1.60339e+06	1.16492e+07	6.62629e+06	911380	11.4747	20.9545	11.4548	1.04021	4.085	12.3222	1.7593	12.7819	7.27061
C10409	1.04169e+06	1.00526e+06	1.00929e+06	1.17049e+06	1.11804e+06	1.16234e+06	1.20249e+06	2.54199e+06	1.19873e+06	1.08389e+06	1.1584e+06	1.12115e+06	1.01478e+06	1.09031	1.07494	1.08333	1.18497	2.50496	1.18126	1.0681	1.14153	1.10482
C09926	178149	210617	187903	219418	205284	213928	174426	172744	185288	169738	188879	179309	187026	1.05813	1.16257	1.17868	0.932629	0.92364	0.990711	0.907564	1.00991	0.958737
C18032	665570	635175	635085	796322	861218	760682	769450	794297	756350	681045	751775	716410	652999	1.16701	1.25646	1.22758	1.17833	1.21638	1.15827	1.04295	1.15127	1.09711
C07497	1.22734e+06	1.29286e+06	1.29632e+06	1.41199e+06	1.37363e+06	1.49964e+06	1.5423e+06	2.10188e+06	1.5135e+06	1.45786e+06	1.55935e+06	1.50861e+06	1.26749e+06	1.20693	1.64831	1.53899	1.21681	1.6583	1.19409	1.1502	1.23027	1.19023
C02630	1.7474e+06	1.84068e+06	1.88868e+06	2.01028e+06	1.95567e+06	2.13507e+06	2.1958e+06	2.99249e+06	2.15481e+06	2.07559e+06	2.22009e+06	2.14784e+06	1.81533e+06	1.19977	1.63853	1.52986	1.20959	1.64846	1.18701	1.14337	1.22297	1.18317
C04039	198656	173111	157619	233636	291721	236274	239325	236299	242989	207178	237817	222498	177867	1.26766	1.57891	1.33914	1.34553	1.32852	1.36613	1.1648	1.33705	1.25093
C05613	1.82697e+06	1.76308e+06	1.76834e+06	1.67159e+06	1.91051e+06	1.73556e+06	1.83204e+06	1.85077e+06	1.72335e+06	1.68375e+06	1.70362e+06	1.69368e+06	1.79657e+06	0.904089	1.0244	0.975892	1.01975	1.03017	0.959246	0.937202	0.948262	0.942732
C07467	1.29145e+06	1.25097e+06	1.2327e+06	1.33033e+06	1.39073e+06	1.25533e+06	1.34029e+06	1.33454e+06	1.33315e+06	1.30147e+06	1.28458e+06	1.29302e+06	1.27479e+06	1.01332	1.0852	1.05448	1.05138	1.04687	1.04578	1.02093	1.00768	1.0143
C01227	1.88242e+06	746953	775767	2.09756e+06	832484	6.32647e+06	4.29854e+06	753846	2.16682e+06	5.18683e+06	2.10001e+06	3.64342e+06	2.32785e+06	4.62552	0.336411	0.328737	1.84657	0.323837	0.930822	2.22816	0.902124	1.56514
C11113	1.07578e+06	1.10915e+06	1.06409e+06	1.08289e+06	1.069e+06	1.15671e+06	1.10274e+06	1.03416e+06	1.09977e+06	1.10477e+06	1.11771e+06	1.11124e+06	1.09307e+06	1.03378	0.962751	1.01884	1.00885	0.946098	1.00612	1.0107	1.02254	1.01662
C09016	1.16944e+06	1.2916e+06	1.29505e+06	1.34459e+06	1.319e+06	1.40547e+06	1.33514e+06	1.44674e+06	1.27102e+06	1.33563e+06	1.33628e+06	1.33595e+06	1.23074e+06	1.18126	1.26278	1.23497	1.08483	1.17551	1.03273	1.08522	1.08576	1.08549
C00249	1.1331e+06	342944	347463	1.14645e+06	639105	525095	595667	5.7281e+06	588469	2.11104e+06	1.31124e+06	1.71114e+06	565573	1.02518	1.32949	1.12123	1.05321	10.1279	1.04048	3.73257	2.31843	3.0255
C06722	810195	1.28025e+07	7.44384e+06	980778	1.00678e+06	959987	942378	1.91201e+07	937390	924492	935708	930100	5.45969e+06	0.17715	0.174222	0.17044	0.172607	3.50204	0.171693	0.16933	0.171385	0.170358
C07122	767682	589405	544135	968231	1.31527e+06	944026	789108	1.04569e+06	807070	771678	913507	842593	650453	1.72728	1.81706	2.05411	1.21317	1.60764	1.24078	1.18637	1.40442	1.29539
C01215	3.16607e+06	3.03723e+06	3.11121e+06	3.0611e+06	1.04085e+07	2.98884e+06	2.96437e+06	3.08707e+06	3.18772e+06	3.09823e+06	3.02599e+06	3.06211e+06	3.08737e+06	0.936433	1.75388	1.63633	0.960161	0.999903	1.0325	1.00352	0.980119	0.991819
C03150	528811	527701	542366	529967	525773	513173	532107	540449	535512	525270	530908	528089	529360	0.981304	1.05324	1.07348	1.00519	1.02095	1.01162	0.992275	1.00293	0.9976
C16483	238134	234457	232014	267480	362638	269744	295081	267952	268017	244893	254546	249720	235261	1.27813	1.47562	1.18461	1.25427	1.13896	1.13923	1.04094	1.08197	1.06146
C15698	693126	683053	666534	737546	667300	704614	740938	710529	788381	708642	755501	732072	678629	1.02948	0.912454	0.947243	1.09182	1.04701	1.16173	1.04423	1.11328	1.07875
C01118	2.1345e+06	2.14393e+06	2.14378e+06	2.30649e+06	3.18992e+07	2.2457e+06	2.42148e+06	1.04276e+07	2.30344e+06	2.15608e+06	2.39129e+06	2.27368e+06	2.15436e+06	1.04235	13.1773	2.03804	1.12399	4.84026	1.0692	1.0008	1.10998	1.05539
C07567	673684	716048	724800	705698	2.57407e+07	722367	774324	1.07595e+06	706356	693067	682919	687993	701334	0.987214	55.3663	29.2076	1.10407	1.53415	1.00716	0.988213	0.973743	0.980978
C19615	2.22104e+06	688659	695972	5.33855e+06	711803	4.859e+06	5.8917e+06	717015	5.48295e+06	2.89181e+06	6.17083e+06	4.53132e+06	1.47034e+06	3.62802	0.502766	0.492494	4.00704	0.487654	3.72904	1.96677	4.19689	3.08183
C14642	5.67268e+06	1.71462e+06	1.78473e+06	6.58992e+06	6.29447e+06	6.86899e+06	7.03225e+06	6.38363e+06	7.19085e+06	6.19999e+06	6.65511e+06	6.42755e+06	3.76257e+06	1.766	1.72231	1.50791	1.869	1.69661	1.91115	1.64781	1.76877	1.70829
C01214	465929	533576	458897	571646	567294	583074	514256	525813	498972	512219	508072	510146	496054	1.26326	1.153	1.25683	1.0367	1.05999	1.00588	1.03259	1.02423	1.02841
C16563	8.60329e+06	585678	594648	1.4482e+07	572011	1.63433e+07	2.00371e+07	603726	2.32201e+07	1.56511e+07	2.62697e+07	2.09604e+07	4.97112e+06	2.70265	0.112982	0.108405	4.03071	0.121447	4.67101	3.14841	5.28446	4.21643
C07809	411240	350620	358994	1.4482e+07	342795	1.63433e+07	4.67814e+06	349228	2.32201e+07	1.56511e+07	2.62697e+07	2.09604e+07	416431	32.2627	0.842593	0.906457	11.2339	0.838621	55.7598	37.5839	63.0829	50.3334
C13719	236323	257273	267816	259138	252423	255975	269807	257127	253644	245833	254425	250129	249303	1.01516	1.16497	1.14843	1.08225	1.03138	1.01741	0.986081	1.02055	1.00331
C05193	1.06034e+06	1.01191e+06	1.01177e+06	1.26864e+06	1.37203e+06	1.21186e+06	1.22583e+06	1.26542e+06	1.20496e+06	1.08944e+06	1.19767e+06	1.14356e+06	1.04031e+06	1.16701	1.27397	1.22758	1.17833	1.21638	1.15827	1.04723	1.15127	1.09925
C12937	1.64942e+07	3.59578e+06	3.42366e+06	3.7977e+07	3.71659e+06	3.68007e+07	4.28686e+07	3.59172e+06	5.18448e+07	2.72866e+07	4.83577e+07	3.78222e+07	9.93988e+06	3.3867	0.39413	0.367263	4.31279	0.361345	5.21584	2.74517	4.86502	3.80509
C09707	1.84717e+06	426221	431358	3.30879e+06	1.35261e+06	3.15486e+06	3.70778e+06	805419	3.61501e+06	2.17513e+06	3.82463e+06	2.99988e+06	1.14994e+06	2.96988	6.25151	1.19945	3.22432	0.700401	3.14365	1.89152	3.32594	2.60873
C03495	168335	177258	157824	177845	194878	196715	199821	287748	206649	177445	220549	198997	167577	1.10302	1.48668	1.16791	1.19241	1.71711	1.23316	1.05888	1.3161	1.18749
C07871	1.7916e+07	417998	396392	451501	449198	435542	470437	403974	476449	422489	450188	436339	1.38147e+07	0.0328325	0.0299619	0.027818	0.0340532	0.0292422	0.0344885	0.0305825	0.0325875	0.031585
C11516	3.42273e+06	3.46174e+06	3.55041e+06	3.30637e+06	3.41157e+06	3.58043e+06	3.41339e+06	3.238e+06	3.33107e+06	3.35033e+06	3.22414e+06	3.28723e+06	3.47796e+06	1.02408	0.914631	1.01974	0.981435	0.931006	0.957764	0.963302	0.927018	0.94516
C11700	2.84085e+07	2.56721e+06	2.49252e+06	3.85746e+06	2.49249e+06	6.46661e+06	1.4405e+07	2.40793e+06	3.93753e+07	5.67147e+07	4.0563e+06	3.03855e+07	9.19994e+06	0.566433	0.259929	0.264243	1.56577	0.261734	4.27995	6.16468	0.440905	3.30279
C12311	4.14834e+06	3.98866e+06	3.82402e+06	5.34658e+06	5.48638e+06	4.63361e+06	4.77608e+06	4.83469e+06	5.49089e+06	4.50382e+06	5.02526e+06	4.76454e+06	4.06426e+06	1.2207	1.33614	1.24425	1.17514	1.18956	1.35102	1.10815	1.23645	1.1723
C14796	198735	185820	186552	191276	190074	184349	183130	181090	181094	188245	182971	185608	189271	12.9788	0.977559	0.990856	0.967556	0.95678	0.956798	0.99458	0.966718	0.980649
C07079	2.32199e+06	4.29807e+06	2.40861e+06	2.27396e+06	2.81387e+07	2.42897e+06	2.31566e+06	2.80983e+07	2.31461e+06	2.31991e+06	2.37288e+06	2.3464e+06	2.88757e+06	5.36448	10.3093	7.07445	0.80194	9.73079	0.801579	0.803413	0.821759	0.812586
C19303	3.53531e+06	3.72681e+06	3.65305e+06	3.66978e+06	3.53363e+06	3.58791e+06	3.18679e+06	3.13235e+06	3.3361e+06	3.25667e+06	3.25166e+06	3.25417e+06	3.62777e+06	0.982669	0.957002	1.06377	0.878443	0.863434	0.919601	0.897706	0.896323	0.897014
C14155	161839	200602	208823	164490	215432	190170	199227	204490	203621	181236	179593	180414	185505	0.989534	1.11433	1.19147	1.07397	1.10235	1.09766	0.976988	0.968134	0.972561
C20452	3.24797e+07	668787	670316	1.95598e+07	1.25265e+07	3.80383e+07	2.67891e+07	8.03925e+06	1.8939e+07	8.60496e+06	4.67746e+07	2.76898e+07	1.54659e+07	2.52696	0.778158	0.601597	1.73214	0.519805	1.22457	0.556384	3.02437	1.79038
C04672	551575	442409	450394	908566	451602	775428	1.22888e+06	428907	1.84578e+06	2.31047e+06	2.43331e+06	2.37189e+06	490855	1.0848	0.882693	0.880285	2.50354	0.873796	3.76034	4.70703	4.9573	4.83217
HMDB0304500	3.22589e+07	4.49734e+07	2.96623e+07	2.99609e+07	3.72704e+07	1.08047e+07	3.31616e+07	2.63748e+07	3.6045e+07	3.65257e+07	4.18181e+07	3.91719e+07	3.40264e+07	0.857501	1.52294	0.267655	0.974583	0.775128	1.05932	1.07345	1.22899	1.15122
C02074	3.54452e+07	723498	731181	2.46026e+07	747813	3.05291e+07	3.09343e+07	753289	6.12769e+06	3.35112e+07	7.11555e+06	2.03134e+07	2.07302e+07	0.272791	0.0374639	0.0366985	1.49224	0.0363378	0.295593	1.61655	0.343246	0.979896
C08092	2.58501e+06	2.61019e+06	2.48525e+06	2.47419e+06	2.68824e+06	2.54178e+06	2.42805e+06	2.60724e+06	2.44835e+06	2.6661e+06	2.41532e+06	2.54071e+06	2.56193e+06	0.970919	1.11002	1.03435	0.947741	1.01769	0.955665	1.04066	0.942774	0.991718
C02647	244841	280389	241146	300395	298108	306400	270237	276310	262205	269167	266987	268077	260672	1.26326	1.153	1.25683	1.0367	1.05999	1.00588	1.03259	1.02423	1.02841
C11729	1.85388e+06	1.85899e+06	1.86901e+06	1.921e+06	1.82128e+06	1.949e+06	1.91049e+06	1.8414e+06	1.91401e+06	1.83931e+06	1.93371e+06	1.88651e+06	1.85888e+06	1.0618	0.996249	1.02365	1.02776	0.9906	1.02966	0.989475	1.04026	1.01487
C16366	292697	349429	319550	331170	2.91394e+06	351865	315985	7.63923e+06	322673	334853	315156	325004	319465	1.11729	13.3019	20.7507	0.989109	23.9126	1.01004	1.04817	0.986513	1.01734
C15739	1.28986e+06	1.19532e+06	1.17568e+06	1.34625e+06	1.22115e+06	1.34507e+06	1.28145e+06	1.12975e+06	1.34161e+06	1.2787e+06	1.28203e+06	1.28036e+06	1.21279e+06	0.996558	0.966279	1.02996	1.05661	0.931533	1.10622	1.05434	1.05709	1.05572
HMDB0001538	252847	296347	292339	298051	293719	304741	256565	273227	247323	275306	271287	273297	277644	1.03689	1.05327	1.21024	0.924079	0.98409	0.890791	0.991579	0.977103	0.984341
C11684	4.16137e+07	3.26174e+06	3.16684e+06	3.15377e+07	3.1668e+06	1.52704e+07	3.08257e+07	3.05937e+06	3.28946e+07	4.22182e+07	1.06575e+07	2.64378e+07	2.42831e+07	1.27674	0.125119	0.127195	1.26943	0.125988	1.35463	1.73858	0.438886	1.08873
C02240	1.05734e+06	975749	795826	1.16359e+06	1.30157e+06	1.14763e+06	948981	1.13415e+06	992179	1.00698e+06	1.05642e+06	1.0317e+06	978559	1.196	1.40619	1.31128	0.969774	1.159	1.01392	1.02904	1.07957	1.05431
C02918	730656	573202	531718	946136	1.28525e+06	922484	771101	1.02183e+06	788653	754069	892661	823365	636240	1.61241	1.81525	2.09501	1.21197	1.60604	1.23955	1.18519	1.40302	1.29411
C14397	4.19657e+07	3.97381e+07	3.493e+07	5.24816e+07	4.90328e+07	4.56367e+07	4.23329e+07	4.28044e+07	4.94831e+07	4.33549e+07	4.98744e+07	4.66146e+07	3.92937e+07	1.00071	0.801333	1.18322	1.07735	1.08935	1.25931	1.10336	1.26927	1.18631
C15546	207013	210808	210854	220321	220477	214685	219292	215910	214050	211531	205444	208488	208674	1.06774	1.0635	1.08698	1.05088	1.03468	1.02576	1.01369	0.984524	0.999109
C05350	2.9541e+07	3.6553e+07	7.15918e+06	1.46306e+07	2.13005e+07	2.80015e+07	4.8617e+07	2.0924e+07	7.76789e+06	1.723e+07	2.65651e+07	2.18975e+07	2.44238e+07	0.74194	1.87726	0.752374	1.99056	0.856707	0.318046	0.70546	1.08767	0.896567
C01010	1.67043e+06	1.7596e+06	1.80549e+06	1.92174e+06	1.86953e+06	2.04103e+06	2.09909e+06	2.86069e+06	2.05989e+06	1.98417e+06	2.1223e+06	2.05323e+06	1.73537e+06	1.19977	1.63853	1.52986	1.20959	1.64846	1.18701	1.14337	1.22297	1.18317
C08491	1.39094e+06	1.42112e+06	1.34132e+06	1.44927e+06	1.60814e+06	1.54445e+06	1.48631e+06	1.6055e+06	1.47994e+06	1.41077e+06	1.51944e+06	1.4651e+06	1.3899e+06	1.09785	1.12937	1.14335	1.06937	1.15513	1.06479	1.01502	1.0932	1.05411
C00284	551444	588016	587203	573105	555616	593507	513841	467546	537651	512556	542688	527622	547389	1.05198	1.07509	1.08999	0.938713	0.854139	0.982209	0.936365	0.991412	0.963889
C00385	281132	294205	311648	304524	302113	294873	291251	310547	307710	301825	305064	303445	296239	0.999483	1.08146	1.10224	0.983162	1.0483	1.03872	1.01886	1.02979	1.02432
C15358	566693	435091	347492	665139	970913	696868	557702	726857	534606	569643	573284	571463	466610	1.77742	1.8698	2.09698	1.19522	1.55774	1.14572	1.22081	1.22861	1.22471
C19243	5.41063e+06	5.11633e+06	4.93168e+06	5.6472e+06	5.37028e+06	5.64225e+06	5.80588e+06	5.07481e+06	5.77014e+06	5.54859e+06	5.911e+06	5.72979e+06	5.12347e+06	1.10553	1.04141	1.0227	1.13319	0.990502	1.12622	1.08297	1.15371	1.11834
C11602	3.0327e+06	3.06225e+06	2.91567e+06	2.90269e+06	3.15382e+06	2.98199e+06	3.07197e+06	3.05879e+06	2.87238e+06	3.12785e+06	2.91793e+06	3.02289e+06	3.00563e+06	0.971407	1.11002	1.03435	1.02207	1.01769	0.955665	1.04066	0.97082	1.00574
C07499	3.40449e+07	418181	392592	6.2986e+06	416098	5.79621e+06	5.52715e+06	379005	6.2295e+06	3.78835e+07	5.7073e+06	2.17954e+07	1.61436e+07	0.275588	0.0248908	0.0245857	0.342373	0.023477	0.38588	2.34665	0.353532	1.35009
C10851	221302	187857	194648	258760	566132	260718	281252	291385	282782	400960	270839	335900	205684	1.2913	4.47994	1.42308	1.3674	1.41666	1.37484	1.9494	1.31677	1.63308
C09364	530030	577017	606360	581200	566139	593058	605129	576691	568877	565885	576462	571173	560567	1.04507	1.16201	1.14551	1.0795	1.02876	1.01483	1.00949	1.02836	1.01892
C11341	352608	429891	381873	8.04005e+06	413005	4.2938e+06	2.10332e+06	384191	6.44891e+06	3.07632e+06	3.77419e+06	3.42525e+06	385773	4.12776	1.06591	1.22476	5.45222	0.995899	16.7168	7.97442	9.78343	8.87892
C01904	148183	127226	121809	174055	226473	176379	186041	187679	176606	144479	197912	171195	136260	1.28601	1.57959	1.46159	1.36533	1.37735	1.29609	1.06031	1.45245	1.25638
C11987	1.02662e+06	1.0117e+06	988862	1.03986e+06	988371	1.05203e+06	1.09744e+06	1.0524e+06	1.14217e+06	1.10892e+06	1.11901e+06	1.11397e+06	1.01308e+06	1.05325	1.07294	1.02635	1.08327	1.03881	1.12743	1.0946	1.10456	1.09958
C09164	4.16482e+06	1.99373e+06	2.07666e+06	4.75404e+06	5.24406e+06	4.64122e+06	5.05087e+06	5.47652e+06	5.50341e+06	4.29636e+06	4.88436e+06	4.59036e+06	3.06745e+06	1.55544	1.81933	1.8935	1.6466	1.78536	1.79413	1.40063	1.59232	1.49647
C03169	115866	112269	112986	120678	119150	121943	124522	121744	117215	118172	117554	117863	114567	1.0459	1.06547	1.02534	1.08689	1.06264	1.02311	1.03146	1.02607	1.02877
C00147	409153	498829	443111	433345	479235	468087	442140	445801	432059	414557	438760	426659	447636	1.09553	1.06591	1.22476	0.987722	0.995899	0.965201	0.926102	0.980171	0.953137
C12842	2.21249e+06	2.13821e+06	2.19824e+06	2.23487e+06	2.31033e+06	2.26502e+06	2.2599e+06	2.28272e+06	2.25089e+06	2.17611e+06	2.11886e+06	2.14748e+06	2.16673e+06	1.01498	1.01096	1.03367	1.043	1.05353	1.03884	1.00433	0.977907	0.991118
C00144	214601	222964	220186	243351	228224	238462	239217	227151	244617	226451	235209	230830	222541	1.06044	1.0348	1.13294	1.07493	1.02072	1.0992	1.01757	1.05692	1.03725
C03137	769391	810405	775187	773569	767166	805926	788789	754850	764830	778363	761605	769984	783383	0.991014	0.968868	0.987722	1.0069	0.963578	0.976317	0.993592	0.9722	0.982896
C16415	1.06012e+07	533290	547138	1.86682e+07	558634	1.82835e+07	2.6749e+07	568753	2.11211e+07	1.23213e+07	3.0887e+07	2.16041e+07	6.0692e+06	3.29541	0.0941083	0.0970415	4.40733	0.0937112	3.48004	2.03013	5.08914	3.55963
C10015	3.38101e+06	565165	605518	1.88619e+07	583697	2.69697e+07	1.97059e+07	571886	1.2445e+07	1.57979e+07	1.27069e+07	1.42524e+07	6.34349e+06	6.13134	0.09299	0.0921612	3.10647	0.0901531	1.96186	2.49042	2.00315	2.24678
C07852	643503	604966	566165	584474	675001	630981	677413	2.15126e+06	614177	578865	627547	603206	604440	1.0295	1.13385	1.06999	1.12073	3.5591	1.01611	0.957688	1.03823	0.997958
C19998	699784	689861	737320	741456	828771	819066	825910	720667	819526	758707	832647	795677	717131	1.13315	1.11347	1.02545	1.15169	1.00493	1.14278	1.05798	1.16108	1.10953
C20669	472550	419118	353489	520035	553996	512903	424122	480551	443429	448917	472140	460528	429168	1.21878	1.28406	1.28288	0.988244	1.11973	1.03323	1.04602	1.10013	1.07307
C14526	330537	348627	359843	372679	323600	359207	367629	320870	375429	362358	357516	359937	355391	1.0045	0.922182	1.03778	1.03443	0.902865	1.05638	1.0196	1.00598	1.01279
C07461	2.5979e+07	2.58779e+07	2.94836e+07	3.99197e+07	4.6412e+07	4.31892e+07	3.84772e+07	3.85023e+07	4.25968e+07	3.48985e+07	3.53391e+07	3.51188e+07	2.71454e+07	1.46956	1.61858	1.57838	1.41745	1.41837	1.56921	1.28562	1.30185	1.29373
HMDB0033115	509270	519100	497740	491454	513576	490142	450024	431053	445192	481769	434377	458073	505813	1.00689	0.862469	1.05554	0.889703	0.852198	0.88015	0.952464	0.85877	0.905617
C16485	365536	303346	270675	372692	451474	383195	329172	407260	338529	338709	355293	347001	329005	1.29484	1.52086	1.63834	1.00051	1.23786	1.02895	1.0295	1.0799	1.0547
C15066	2.25371e+07	407819	392768	6.13275e+06	465726	5.55344e+06	2.36127e+07	449997	3.01857e+07	1.73569e+07	1.69915e+07	1.71742e+07	1.1522e+07	0.0390159	0.0401362	0.0398752	2.04936	0.0390554	2.61983	1.50642	1.4747	1.49056
C10942	4.24844e+06	1.58766e+06	2.48646e+06	1.65943e+06	4.02781e+06	4.1668e+06	3.80812e+06	6.19341e+06	4.35484e+06	3.93333e+06	3.64329e+06	3.78831e+06	2.80735e+06	1.67776	1.57881	1.60866	1.35648	2.20614	1.55123	1.40109	1.29777	1.34943
C01407	592329	552453	536380	1.02172e+06	513215	787106	931719	518177	551671	668860	597543	633202	577827	1.94075	0.889303	0.854596	1.61245	0.896768	0.954734	1.15754	1.03412	1.09583
C00227	588177	704563	678262	693780	585625	678304	602471	560320	630699	576258	614734	595496	631089	1.06724	1.04003	1.15606	0.954653	0.887863	0.999382	0.913117	0.974084	0.9436
C07875	342880	365621	365115	356349	345475	369035	332829	290714	334304	318701	337436	328068	340359	1.05198	1.07509	1.08999	0.977875	0.854139	0.982209	0.936365	0.991412	0.963889
C03954	306065	301339	298200	343782	466086	346692	379258	453036	359210	314753	379740	347246	302373	1.91474	1.47562	1.27545	1.25427	1.49827	1.18797	1.04094	1.25587	1.1484
C00059	5.39573e+06	5.33629e+06	4.18427e+06	2.2814e+06	1.40362e+06	2.99968e+06	1.9972e+06	1.87257e+06	2.30904e+06	3.53174e+06	2.57341e+06	3.05257e+06	5.26025e+06	0.559907	0.267744	0.337705	0.379678	0.355984	0.438961	0.671402	0.489217	0.580309
C15809	311719	246970	223701	292535	292668	319545	323138	299418	296433	285011	262662	273837	270659	1.18729	1.22558	1.23351	1.19389	1.10626	1.09523	1.05303	0.970456	1.01174
C01279	961718	471628	492157	1.03697e+06	484124	1.10979e+06	1.16512e+06	505267	1.11464e+06	1.05288e+06	1.13913e+06	1.09601e+06	721543	1.47635	0.68203	0.689684	1.61477	0.700259	1.5448	1.45921	1.57874	1.51897
C20268	312883	358310	308162	383876	380953	391550	345337	353098	335073	343969	341184	342576	333113	1.26326	1.153	1.25683	1.0367	1.05999	1.00588	1.03259	1.02423	1.02841
C03434	231839	243869	271635	255004	1.02294e+06	261904	248440	254710	284895	251168	249199	250183	240672	0.985093	2.951	1.17843	1.03228	1.05833	1.18375	1.04361	1.03543	1.03952
C08261	1.86096e+06	1.62661e+06	1.65091e+06	2.18768e+06	2.72356e+06	2.30284e+06	2.22591e+06	2.41918e+06	2.33795e+06	1.92214e+06	2.2064e+06	2.06427e+06	1.73722e+06	1.24236	1.49981	1.49873	1.2813	1.39256	1.3458	1.10644	1.27007	1.18826
C15182	775441	748325	751322	871326	832278	865253	883538	757275	876681	806861	862327	834594	755415	1.09031	1.07494	1.08333	1.16961	1.00246	1.16053	1.0681	1.14153	1.10482
C19891	1.21838e+06	1.22211e+06	1.26382e+06	1.17695e+06	1.2144e+06	1.27451e+06	1.21505e+06	1.15262e+06	1.18575e+06	1.20496e+06	1.17634e+06	1.19065e+06	1.2355e+06	1.02618	0.938516	0.967481	0.98345	0.932918	0.959731	0.975283	0.952114	0.963698
C17705	517680	532843	502923	500582	598573	526471	557285	543521	543302	489402	569706	529554	511134	1.01294	1.15068	1.16572	1.09029	1.06336	1.06293	0.957482	1.11459	1.03604
C16923	409391	348810	361866	458620	576114	471097	470893	499670	462543	420153	478048	449100	381599	1.20198	1.35082	1.38676	1.234	1.30941	1.21212	1.10103	1.25275	1.17689
C07460	820508	721245	731561	2.59351e+06	1.78002e+07	5.40544e+06	5.62865e+06	7.59456e+06	5.48017e+06	5.12858e+06	4.7245e+06	4.92654e+06	786040	1.45728	25.1669	19.9289	7.16077	9.66179	6.97186	6.52457	6.01051	6.26754
C10807	3.46825e+06	663019	731029	2.45024e+06	661741	1.96518e+07	4.78734e+06	612310	5.15337e+06	1.02876e+07	5.4742e+06	7.88091e+06	1.56538e+06	2.19445	0.418419	0.405062	3.05826	0.391158	3.29209	6.57198	3.49704	5.03451
C06195	183141	159839	169762	187357	233181	211671	212649	211682	213589	188913	198091	193502	175922	1.21239	1.33539	1.22309	1.20877	1.20327	1.21411	1.07384	1.12602	1.09993
C08607	1.60947e+06	600118	587609	1.67719e+06	1.90443e+06	1.69526e+06	1.93594e+06	1.91318e+06	1.75033e+06	1.70714e+06	1.77753e+06	1.74234e+06	1.11884e+06	1.48723	1.78295	1.67691	1.73032	1.70997	1.56442	1.52582	1.58873	1.55727
C06323	393572	390010	410997	2.94223e+06	375302	568850	4.40596e+06	361657	6.48719e+06	383895	1.69903e+06	1.04146e+06	399230	14.1443	0.947538	0.951273	11.0361	0.905885	16.2492	0.961589	4.25576	2.60867
C07967	3.73655e+07	4.21923e+07	4.04213e+07	3.29669e+07	3.92793e+07	3.79537e+07	4.2468e+07	4.03693e+07	3.84603e+07	3.94499e+07	4.38703e+07	4.16601e+07	4.0571e+07	0.981762	0.990315	0.939295	1.04676	0.99503	0.947977	0.972368	1.08132	1.02685
C00757	2.79586e+07	2.91548e+07	2.86702e+07	2.7794e+07	2.6104e+07	2.85447e+07	2.85038e+07	2.83848e+07	2.75367e+07	2.80163e+07	2.89388e+07	2.84775e+07	2.84573e+07	0.939512	0.93349	0.977687	1.00163	0.997454	0.967653	0.984506	1.01692	1.00071
C06173	1.2211e+06	619433	627629	1.46792e+06	573076	1.41905e+06	1.34908e+06	525702	1.47996e+06	1.31295e+06	1.42084e+06	1.3669e+06	928833	1.52993	0.6008	0.601147	1.45245	0.565981	1.59336	1.41355	1.5297	1.47163
C00110	398808	284023	288752	699551	3.41532e+06	486332	561273	465330	511838	479042	542034	510538	334140	1.57502	5.81097	6.42725	1.67975	1.39262	1.53181	1.43366	1.62218	1.52792
C00624	2.31427e+06	1.65855e+06	1.29813e+06	3.45313e+07	1.12921e+07	3.00193e+06	7.44888e+06	2.5277e+06	2.08019e+07	6.19045e+06	2.72281e+06	4.45663e+06	1.68127e+06	15.2897	2.06597	25.9886	4.43051	1.50345	12.3728	3.68201	1.6195	2.65075
C00988	2.86959e+06	2.67176e+06	2.57469e+06	3.65567e+06	3.75818e+06	3.2104e+06	3.49378e+06	3.32187e+06	3.42897e+06	3.15918e+06	3.40919e+06	3.28419e+06	2.76485e+06	1.34369	1.39094	1.41029	1.26364	1.20146	1.2402	1.14263	1.23305	1.18784
C09675	2.31761e+06	761011	716520	4.3817e+06	740676	4.68924e+06	998605	700560	4.22787e+06	1.51752e+06	6.89433e+06	4.20593e+06	1.36212e+06	0.679132	0.517693	0.544483	0.733128	0.514318	3.1039	1.11409	5.06148	3.08779
C11773	4.752e+06	350188	319835	1.44018e+07	321227	1.30451e+07	1.55886e+07	335528	1.12865e+07	4.99183e+06	1.303e+07	9.01091e+06	1.96656e+06	6.8713	0.159349	0.171844	7.92684	0.170617	5.73922	2.53836	6.62577	4.58206
C17868	241877	244308	236449	254468	253946	255383	260703	239524	269531	256205	249990	253097	242502	1.0607	1.01331	0.996507	1.07506	0.987721	1.11146	1.05651	1.03088	1.04369
C10285	747710	172528	169396	1.23736e+06	177426	1.18677e+06	1.49126e+06	185151	1.46331e+06	880464	1.52442e+06	1.20244e+06	464177	2.97821	0.399382	0.379585	3.21269	0.398879	3.15247	1.89683	3.28414	2.59048
C08782	444012	456686	505533	493511	465361	471807	443065	474034	467281	461322	442548	451935	455804	1.05648	1.1747	1.15802	0.972052	1.04	1.02518	1.01211	0.970918	0.991513
C11172	301047	296399	293311	338146	458445	341008	373039	471600	353321	309592	373513	341553	297415	1.27813	1.47562	1.18461	1.25427	1.58566	1.18797	1.04094	1.25587	1.1484
C09815	295229	250527	209721	299636	355103	316472	271856	308026	279584	279733	293429	286581	266597	1.19833	1.31372	1.32176	1.01972	1.1554	1.04871	1.04927	1.10065	1.07496
C01133	1.18461e+06	1.19426e+06	1.22692e+06	1.27396e+06	2.33003e+07	1.19681e+06	1.33786e+06	1.22574e+06	1.31829e+06	1.19697e+06	1.30277e+06	1.24987e+06	1.20758e+06	0.993035	19.3677	0.938835	1.10788	1.01503	1.09168	0.99121	1.07882	1.03502
C03411	945991	941179	902762	923539	1.03896e+06	972507	974791	948239	1.02507e+06	1.03345e+06	1.10521e+06	1.06933e+06	938622	1.00862	1.08468	1.04838	1.03853	1.01025	1.0921	1.10103	1.17748	1.13926
C04671	1.36402e+06	1.43186e+06	1.42263e+06	1.57308e+06	1.44103e+06	1.64342e+06	1.78476e+06	1.36783e+06	1.53154e+06	1.44097e+06	1.6349e+06	1.53794e+06	1.37712e+06	1.19189	1.00405	1.07356	1.29602	0.993261	1.11214	1.04637	1.18719	1.11678
C19556	2.79336e+07	1.45999e+06	1.66313e+06	3.08083e+07	1.45823e+06	2.99449e+07	3.15774e+07	1.38784e+06	3.33857e+07	3.56663e+07	3.66512e+07	3.61588e+07	1.58138e+07	1.82197	0.0887131	0.0946049	1.99682	0.087761	2.11117	2.25539	2.31767	2.28653
C00049	1.52276e+06	1.47858e+06	1.51084e+06	1.60641e+06	1.58465e+06	1.58599e+06	1.5892e+06	1.52699e+06	1.6244e+06	1.57948e+06	1.51982e+06	1.54965e+06	1.5355e+06	1.06345	1.05792	1.0518	1.03497	0.994453	1.05789	1.02864	0.989786	1.00921
C12065	286918	220815	226062	304638	422085	340625	345157	354189	371635	267544	324366	295955	251324	1.28336	1.67263	1.52752	1.37335	1.40929	1.47871	1.06454	1.29063	1.17758
C05683	480618	440485	441889	506655	503383	503369	544215	480096	519898	520097	554068	537083	458292	1.1585	1.01147	1.0734	1.18749	1.04758	1.13443	1.13486	1.20899	1.17192
C10923	1.4062e+06	731265	1.54998e+06	447530	1.68179e+06	4.08054e+07	1.59197e+06	926076	1.11701e+06	1.79156e+06	603115	1.19734e+06	1.2032e+06	1.39014	0.768068	1.05145	1.32311	0.769675	0.928363	1.48899	0.501258	0.995123
C08449	796642	331900	351966	979168	1.32883e+07	926611	1.03179e+06	1.14296e+06	1.0525e+06	819785	934112	876948	563026	1.68578	19.2851	8.60443	1.83257	2.03003	1.86936	1.45603	1.65909	1.55756
C16246	863124	784448	671196	1.01306e+06	1.47879e+06	1.06139e+06	894740	1.10707e+06	946730	867617	930831	899224	787530	1.60399	1.68736	1.89237	1.13613	1.40575	1.20215	1.10169	1.18196	1.14183
C08451	695609	378573	405987	773741	1.15471e+06	856409	943213	829372	935475	847808	897911	872859	560583	1.49544	2.02334	1.78231	1.68256	1.47948	1.66876	1.51237	1.60175	1.55706
C07130	487274	501238	491511	552188	507467	524666	526325	499778	538208	526076	523309	524692	497844	1.04296	1.03045	1.11426	1.05721	1.00389	1.08108	1.05671	1.05115	1.05393
C15678	660544	661596	667378	697943	687658	710834	735014	625309	700539	670047	683859	676953	668041	1.09587	1.02302	0.988048	1.10025	0.936034	1.04865	1.003	1.02368	1.01334
C18603	1.23673e+06	461388	468455	9.03071e+06	450621	1.1742e+06	7.48298e+06	475606	3.94883e+07	7.39826e+06	3.54905e+06	5.47366e+06	1.4259e+06	0.350099	0.310302	0.29773	5.24791	0.333549	27.6936	5.1885	2.489	3.83875
C08807	517061	512961	496458	534293	533196	537784	547385	517960	565919	537940	545453	541696	511609	1.05563	1.02259	1.0084	1.06993	1.01241	1.10616	1.05147	1.06615	1.05881
C00655	343967	397190	363228	376436	405086	399960	371698	375466	366778	380622	368857	374739	368456	1.11891	1.10844	1.20825	1.0088	1.01902	0.995445	1.03302	1.00109	1.01705
C09167	1.01129e+06	1.01642e+06	1.07105e+06	1.1732e+06	907425	1.08962e+06	1.10591e+06	954250	1.05162e+06	1.05019e+06	1.1156e+06	1.08289e+06	1.03989e+06	1.07349	0.920778	0.877035	1.06349	0.917646	1.01128	1.0099	1.0728	1.04135
C16525	111569	99084.4	96279.1	148631	195827	153985	152031	136475	147033	893713	149224	521468	104125	1.34928	1.76109	1.69669	1.46008	1.31068	1.41208	8.58306	1.43312	5.00809
C01004	518640	595580	545653	670361	631473	649038	572435	585300	571756	570167	593590	581879	561293	1.24274	1.13427	1.23641	1.01985	1.04277	1.01864	1.01581	1.05754	1.03668
C13720	1.95217e+06	470226	423896	3.53275e+06	8.58208e+06	3.67454e+06	1.16355e+06	2.51281e+06	2.5756e+06	6.66547e+06	7.69176e+06	7.17862e+06	863478	9.83941	14.0796	3.74609	1.34751	2.91011	2.98282	7.71933	8.90789	8.31361
C02890	946731	752528	730634	1.13074e+06	688755	1.97142e+06	9.25696e+06	705839	1.16895e+06	2.86395e+06	2.60978e+06	2.73687e+06	1.15718e+06	1.32006	0.601797	0.61581	7.99956	0.609963	1.01016	2.47493	2.25529	2.36511
C07370	616042	621059	638044	662506	582630	622384	681057	572691	685561	622469	638592	630530	624938	0.997882	0.917979	0.943417	1.0898	0.916397	1.09701	0.996049	1.02185	1.00895
C08433	569236	573872	589567	612170	538363	575096	629312	529179	633474	575175	590073	582624	577457	0.997882	0.917979	0.943417	1.0898	0.916397	1.09701	0.996049	1.02185	1.00895
C17972	424234	460192	445216	475092	424720	449624	485751	391092	438876	422803	449880	436342	449577	0.967679	0.891995	0.896476	1.08046	0.869912	0.976197	0.940446	1.00067	0.970561
C02234	81195.4	106260	89431.8	88190.6	87091.8	95845.8	77618.8	83328.5	82252.6	84571.1	84049.5	84310.3	87273.4	1.00179	1.11844	1.24321	0.889375	0.954799	0.94247	0.969037	0.96306	0.966048
C13044	1.06574e+06	525886	579830	1.29824e+06	524873	1.26173e+06	1.26597e+06	485665	1.36725e+06	1.18993e+06	1.14217e+06	1.16605e+06	820317	1.57813	0.633308	0.61309	1.54327	0.592046	1.66673	1.45058	1.39235	1.42146
C06355	1.766e+06	1.80041e+06	1.77382e+06	1.8425e+06	1.79352e+06	1.86936e+06	1.90324e+06	1.78357e+06	1.8358e+06	1.76066e+06	1.83398e+06	1.79732e+06	1.77953e+06	1.04577	0.998146	1.0256	1.06952	1.00227	1.03162	0.989399	1.0306	1.01
C05643	8.82334e+06	136211	128270	2.11894e+07	1.00811e+07	2.43249e+07	3.16923e+07	5.69127e+06	2.42498e+06	593883	3.04443e+07	1.55191e+07	2.46078e+06	9.80969	3.88364	2.84771	12.879	2.31279	0.985452	0.24134	12.3718	6.30659
C07339	585755	576810	593061	619830	543386	651149	572233	505504	629536	633285	639553	636419	580509	1.10102	0.939576	1.0606	0.985744	0.870795	1.08446	1.09091	1.10171	1.09631
C11255	580176	630657	589517	688766	641040	731521	719041	857536	738283	711143	726749	718946	600776	1.20676	1.69633	1.58383	1.19685	1.42738	1.22888	1.18371	1.20968	1.19669
C12011	3.64845e+07	1.32484e+06	1.34973e+06	3.53113e+06	9.05252e+06	4.19809e+06	3.68392e+06	4.27894e+06	3.71978e+06	1.1573e+07	4.51385e+06	8.04345e+06	1.42119e+07	0.305767	0.714999	0.501685	0.259214	0.301082	0.261738	0.814323	0.317611	0.565967
C17928	453155	430329	376757	477019	504740	499676	496255	510552	516398	485092	501895	493493	428324	1.12691	1.20276	1.15975	1.1586	1.19198	1.20563	1.13254	1.17177	1.15215
C13620	212602	227498	224692	238128	232038	452756	265835	778404	640198	245386	602748	424067	219032	1.13181	4.04667	5.03159	1.21368	3.55384	2.92285	1.12032	2.75187	1.9361
C04275	2.45125e+07	2.10232e+06	2.20259e+06	2.79297e+07	2.52272e+07	2.91746e+07	3.41646e+07	1.21282e+07	8.00321e+06	2.5227e+07	3.26319e+07	2.89294e+07	1.24456e+07	2.3221	2.09216	1.90144	2.74512	0.974498	0.643058	2.02699	2.62197	2.32448
C12755	202462	228717	213797	238100	232483	248880	225425	256189	223186	233843	236492	235168	212816	1.2097	1.29317	1.2647	1.05925	1.20381	1.04873	1.0988	1.11125	1.10503
C08726	3.55256e+06	3.88535e+06	3.78293e+06	3.82589e+06	3.57944e+06	3.82354e+06	3.32236e+06	3.2571e+06	3.47802e+06	3.30791e+06	3.49616e+06	3.40203e+06	3.64074e+06	1.02082	1.04134	1.10507	0.912551	0.894626	0.955308	0.908582	0.960288	0.934435
C17715	442739	429948	431805	660340	455341	460484	450866	443509	454184	447533	467051	457292	437428	0.997884	1.0241	1.00989	1.03072	1.0139	1.03831	1.0231	1.06772	1.04541
C07422	2.77121e+06	2.7982e+06	2.66426e+06	2.6524e+06	2.88188e+06	2.72486e+06	2.60294e+06	2.59351e+06	2.58057e+06	2.85814e+06	2.56511e+06	2.71163e+06	2.74647e+06	0.970919	1.11002	1.03435	0.947741	0.944309	0.939596	1.04066	0.933969	0.987315
C05844	2.76367e+06	2.77218e+06	2.73123e+06	2.83698e+06	2.85737e+06	2.87834e+06	2.9305e+06	2.77857e+06	2.82252e+06	2.82301e+06	2.82387e+06	2.82344e+06	2.7596e+06	1.03835	1.00066	1.05559	1.06193	1.00687	1.0228	1.02298	1.02329	1.02313
C16831	1.00628e+06	1.39561e+06	3.14269e+06	1.94075e+06	3.14216e+06	3.15414e+06	1.00547e+06	2.07671e+06	3.2441e+06	1.02142e+06	1.57175e+06	1.29658e+06	1.6187e+06	1.83242	1.39145	1.67557	0.621159	1.28295	2.00414	0.631012	0.97099	0.801001
C06157	286049	291196	273118	308561	320142	340113	359453	489871	339480	313402	363428	338415	285623	1.24826	1.64469	1.51361	1.25849	1.71509	1.18856	1.09726	1.2724	1.18483
C12127	837330	853492	818372	810623	844410	830492	739918	708727	754310	792113	719106	755609	831646	1.04621	0.862469	0.999397	0.889703	0.852198	0.907008	0.952464	0.864678	0.908571
C07273	486716	431682	363727	486333	599142	526907	436836	522074	449254	462374	471502	466938	445430	1.15272	1.42204	1.32606	0.980707	1.17207	1.00859	1.03804	1.05853	1.04829
C08675	2.80969e+06	598063	607738	1.58202e+07	611061	2.04398e+07	1.85241e+07	575322	9.69719e+06	1.20251e+07	1.0754e+07	1.13896e+07	4.67411e+06	6.48495	0.126846	0.127519	3.96313	0.123087	2.07466	2.57271	2.30077	2.43674
C04771	251430	300163	274497	284479	306130	302257	271435	283746	277180	287642	270723	279183	274424	1.11729	1.1247	1.22597	0.989109	1.03397	1.01004	1.04817	0.986513	1.01734
C09382	1.16785e+06	357913	427563	1.46819e+06	1.25749e+06	1.53037e+06	1.42903e+06	1.17263e+06	1.60207e+06	1.24983e+06	1.48272e+06	1.36627e+06	796609	1.73502	1.69066	1.55797	1.79389	1.47203	2.01112	1.56894	1.86128	1.71511
C10869	727364	297101	297304	803532	988475	872533	923607	978036	937535	803490	889670	846580	524072	1.54661	1.81688	1.81838	1.76237	1.86623	1.78894	1.53317	1.69761	1.61539
C11088	2.20813e+06	2.14034e+06	2.19983e+06	2.30587e+06	2.14428e+06	2.30771e+06	2.19619e+06	2.27359e+06	2.24488e+06	2.25967e+06	2.27285e+06	2.26626e+06	2.18399e+06	1.06157	1.04894	1.08903	1.00559	1.04103	1.02788	1.03465	1.04069	1.03767
C03750	247425	234560	236707	261023	361492	270184	306594	407445	290387	252767	306984	279876	241089	1.12999	1.49613	1.16104	1.27171	1.69002	1.20448	1.04844	1.27332	1.16088
C00061	407119	421263	447023	436039	442717	445154	437245	446825	429864	441483	438554	440019	425515	1.00109	1.03187	1.14105	1.02757	1.05008	1.01022	1.03753	1.03064	1.03408
C16547	598036	589556	630115	633649	708269	699975	705823	615883	700368	648392	711581	679987	612861	1.13315	1.11347	1.02545	1.15169	1.00493	1.14278	1.05798	1.16108	1.10953
C08313	510749	544280	521883	492348	491081	529613	471853	451962	466416	505138	458580	481859	524542	1.01803	0.892486	1.06722	0.899551	0.861631	0.889186	0.963006	0.874248	0.918627
C08141	3.06098e+06	2.60439e+07	2.45839e+07	3.08694e+07	2.7846e+07	2.76407e+07	2.9341e+07	2.98198e+07	2.96214e+07	2.87608e+07	3.21082e+07	3.04345e+07	1.95034e+07	1.60938	1.16373	1.55665	1.5044	1.52895	1.51878	1.47465	1.64628	1.56047
C01674	820744	846691	806735	836256	742191	820689	806277	752403	807405	790153	761967	776060	808881	0.98501	0.894744	0.894488	0.99678	0.930177	0.998174	0.976847	0.942	0.959424
C02951	285600	309575	288613	339055	321529	360101	370345	438101	363430	350070	357752	353911	296192	1.2402	1.69375	1.58141	1.25035	1.47911	1.22701	1.1819	1.20784	1.19487
C07734	238186	242472	233253	268101	266574	283204	299307	407903	293719	282921	302617	292769	239290	1.24066	1.69437	1.58199	1.25082	1.70464	1.22746	1.18234	1.26465	1.22349
C12081	633401	636202	585180	658779	583587	631075	685703	613508	657630	620628	692174	656401	622428	1.04753	0.914666	0.986384	1.10166	0.985671	1.05656	0.99711	1.11206	1.05458
C11707	1.82772e+06	1.76381e+06	1.81349e+06	2.05373e+06	2.03842e+06	2.03941e+06	2.10987e+06	1.79346e+06	2.10327e+06	1.95106e+06	2.04796e+06	1.99951e+06	1.80724e+06	1.10594	1.08673	1.06731	1.16746	0.992378	1.1638	1.07958	1.1332	1.10639
C19488	2.43598e+06	1.00812e+06	967772	3.69855e+06	1.04976e+06	2.81155e+06	3.47156e+06	1.02609e+06	3.95765e+06	2.62146e+06	3.31469e+06	2.96808e+06	1.73445e+06	2.06595	0.58247	0.600625	2.00153	0.591595	2.28179	1.51141	1.91109	1.71125
C11800	368725	285331	268331	477468	560417	455180	389136	3.21606e+07	397994	370325	450481	410403	315284	1.56204	1.76021	2.08979	1.23424	102.005	1.26233	1.17457	1.42881	1.30169
C05944	1.81787e+06	815094	687461	1.01136e+06	1.17822e+06	997487	829794	1.15733e+06	862373	873046	918210	895628	1.06594e+06	1.06961	1.32339	1.41475	0.778463	1.08574	0.809027	0.81904	0.86141	0.840225
C09258	265089	231990	239104	384408	265876	400040	451933	279208	513550	666064	512825	589444	304660	1.08004	0.88873	0.870063	1.4834	0.916456	1.68565	2.18625	1.68327	1.93476
C15147	753031	778129	748209	834560	8.11633e+06	812977	875228	1.04366e+06	877565	805128	840511	822820	758915	1.1208	35.3857	18.6978	1.15326	1.3752	1.15634	1.06089	1.10752	1.08421
C13168	607437	589334	629877	9.13068e+06	664439	1.42467e+07	1.93789e+07	619949	1.40052e+07	1.09431e+07	2.18201e+07	1.63816e+07	1.21534e+06	11.5137	0.56128	0.551249	15.9452	0.510102	11.5237	9.00415	17.9539	13.479
C08588	228582	235201	225554	236997	241613	236754	242645	233106	236586	231809	225139	228474	227861	1.06696	1.06731	1.05409	1.06488	1.02302	1.03829	1.01733	0.988053	1.00269
C00108	566563	525039	495083	591335	536383	590816	562869	492965	576733	561661	549696	555678	527379	1.00663	0.976049	1.04037	1.06729	0.934745	1.09358	1.065	1.04232	1.05366
C17968	690794	670163	694850	698792	710087	721705	714946	706920	717548	703418	692845	698131	689603	1.10461	0.998046	1.0077	1.03675	1.02511	1.04052	1.02003	1.0047	1.01237
C09983	288878	284417	281454	304755	439913	315451	357960	452537	339038	295116	358415	326765	285393	1.27813	1.47562	1.18461	1.25427	1.58566	1.18797	1.03407	1.25587	1.14497
C02678	658826	657297	667174	696128	685869	693337	733102	623683	696198	668305	682080	675192	660143	1.10052	1.03257	0.997269	1.11052	0.944769	1.05462	1.01236	1.03323	1.0228
C20546	1.62951e+07	1.74433e+07	1.48544e+07	1.78301e+07	2.16273e+07	2.59901e+07	1.70907e+07	2.03533e+07	2.23558e+07	1.75322e+07	1.98907e+07	1.87115e+07	1.55495e+07	1.40182	1.22653	1.20355	1.09911	1.30894	1.43772	1.12751	1.27919	1.20335
C07792	808796	801477	844606	876987	771252	823875	920977	743211	866091	788911	896819	842865	822375	0.966949	0.945291	0.949017	1.1199	0.903737	1.05316	0.959308	1.09052	1.02492
C15626	2.17535e+07	445314	452487	1.90811e+07	3.0085e+07	1.64869e+07	4.3825e+06	1.41066e+07	1.90731e+07	1.98507e+07	1.40315e+07	1.69411e+07	8.9994e+06	1.41936	2.39544	2.68463	0.486977	1.5675	2.11937	2.20578	1.55916	1.88247
C19691	630769	617460	667110	670055	554291	686579	652166	566649	662860	661956	660106	661031	645995	1.08923	0.915696	0.923004	1.00955	0.877173	1.02611	1.02471	1.02184	1.02328
C08752	3.42386e+06	1.68062e+07	3.33854e+06	3.6916e+06	3.40502e+06	3.85667e+06	4.18836e+06	1.58509e+07	4.09347e+06	3.38158e+06	3.83668e+06	3.60913e+06	6.73588e+06	0.631343	0.515946	0.533325	0.621799	2.35321	0.607711	0.502025	0.569588	0.535807
C00906	312667	323724	289047	391234	401604	363843	375916	347108	363113	368781	364044	366412	309366	1.2471	1.22649	1.19986	1.21512	1.122	1.17373	1.19205	1.17674	1.1844
C08370	561969	542086	484017	655132	672498	609265	629482	638504	608043	617534	621241	619388	529051	1.22115	1.2178	1.1749	1.18983	1.20689	1.14931	1.16725	1.17426	1.17075
C08430	600732	620422	681518	665310	653259	657105	645092	659321	640826	630168	643058	636613	625767	1.03742	1.1535	1.1449	1.03088	1.05362	1.02407	1.00703	1.02763	1.01733
C01103	4.82712e+06	5.78451e+06	1.1889e+06	1.7896e+06	965121	883184	848636	4.8444e+06	873843	3.44201e+06	6.32413e+06	4.88307e+06	4.39183e+06	0.780588	0.702757	0.268372	0.19323	1.10305	0.19897	0.78373	1.43997	1.11185
C15730	575402	579617	568894	594237	647399	586175	591321	613887	592278	581399	576178	578789	572020	1.09633	1.20536	1.16869	1.03374	1.07319	1.03542	1.0164	1.00727	1.01183
C04216	467892	419182	430637	440391	443748	456332	446073	453720	434885	463406	499341	481373	451098	1.01022	0.967363	1.01184	0.988861	1.00581	0.964058	1.02728	1.10694	1.06711
C13280	343655	367734	363198	384916	375072	398254	383427	411011	377460	396648	383361	390004	354049	1.13181	1.22661	1.17622	1.08298	1.16089	1.06613	1.12032	1.08279	1.10156
C00902	934135	995743	963338	1.02798e+06	918991	1.0285e+06	1.06451e+06	879683	977029	976404	1.00002e+06	988212	976824	1.01043	0.99337	0.911342	1.08976	0.900554	1.00021	0.99957	1.02375	1.01166
C08303	243625	221353	202552	256455	263180	248927	266796	261927	277626	260795	269828	265311	227775	1.13928	1.14384	1.16532	1.17132	1.14994	1.21886	1.14497	1.18463	1.1648
C16843	107700	92028	92864.9	129975	147786	139148	128523	147872	129279	113624	132019	122821	100045	1.31863	1.50378	1.3359	1.28465	1.47805	1.2922	1.13573	1.31959	1.22766
C04834	623635	600980	653675	645916	636684	654718	683082	666059	624469	786967	664542	725755	622567	0.988169	1.01538	1.07639	1.0972	1.06986	1.00306	1.26407	1.06742	1.16575
C04883	1.83652e+06	1.92975e+06	1.88449e+06	1.94229e+06	1.73909e+06	1.8845e+06	2.0824e+06	1.83122e+06	1.95603e+06	1.91005e+06	1.85303e+06	1.88154e+06	1.90863e+06	1.00252	0.895345	0.917319	1.09105	0.959443	1.02484	1.00074	0.970869	0.985807
C17226	238413	264612	234815	292508	290281	293645	258907	269055	248192	262099	259977	261038	251724	1.17661	1.27243	1.27125	1.02854	1.06885	0.985969	1.04122	1.03279	1.037
C05554	2.48298e+07	2.17113e+06	2.20266e+06	2.54122e+07	2.60528e+07	2.73607e+07	2.86086e+07	1.80576e+07	2.65012e+07	2.42799e+07	2.48139e+07	2.45469e+07	1.27087e+07	0.391634	2.1159	1.92302	2.25111	1.42089	2.08529	1.9105	1.95252	1.93151
C16766	471896	468025	463306	534591	457104	483224	527175	456497	571437	485853	513864	499858	472541	1.07162	0.949808	0.89661	1.11562	0.966049	1.20929	1.02817	1.08745	1.05781
C11035	463763	457661	466065	486165	419642	465127	485865	435321	490963	470853	500290	485571	466757	1.04751	0.876	0.908596	1.04094	0.93265	1.05186	1.00877	1.07184	1.04031
C03406	863450	807363	772941	783360	858487	861919	868361	803383	829895	826615	836751	831683	817232	0.987864	1.04883	1.07346	1.06256	0.983054	1.0155	1.01148	1.02388	1.01768
C02034	910294	891327	890852	943907	936184	928409	937852	915214	906884	933321	920197	926759	896993	1.06227	1.02747	1.05015	1.04555	1.02031	1.01103	1.0405	1.02587	1.03318
C02916	257409	262041	252078	289739	288089	306060	323464	440824	317424	305755	327041	316398	258602	1.24066	1.69437	1.58199	1.25082	1.70464	1.22746	1.18234	1.26465	1.22349
C09570	3.20191e+06	3.2331e+06	3.07834e+06	3.06464e+06	3.32978e+06	3.14836e+06	3.24336e+06	3.22945e+06	3.03263e+06	3.30236e+06	3.08073e+06	3.19154e+06	3.17332e+06	0.971407	1.11002	1.03435	1.02207	1.01769	0.955665	1.04066	0.97082	1.00574
C06742	673778	3.85893e+06	1.6888e+06	785477	806298	740577	754724	1.08644e+07	741309	740399	749382	744890	1.71368e+06	0.452003	0.450763	0.434882	0.440411	6.33981	0.432583	0.432052	0.437294	0.434673
C17241	345148	306121	257932	792211	2.55923e+07	2.01969e+06	1.00778e+06	602497	581948	428315	1.03163e+06	729970	313398	7.29209	15.7312	19.8047	3.21566	1.92247	1.8569	1.36668	3.29175	2.32922
C04556	630018	539877	454890	7.23701e+06	1.29322e+07	4.15878e+06	3.56046e+06	2.1405e+07	6.96433e+06	1.67437e+06	8.41013e+06	5.04225e+06	562399	3.08696	41.6317	3.45428	6.33084	38.0602	12.3832	2.97719	14.954	8.96561
C08005	1.17526e+06	1.15751e+06	1.10455e+06	1.32823e+06	1.12658e+06	1.2291e+06	1.35588e+06	1.07801e+06	3.01716e+06	2.67372e+06	1.31435e+06	1.99404e+06	1.13583e+06	1.23876	1.01671	1.04644	1.19373	0.949094	2.65635	2.35398	1.15717	1.75558
C19548	324255	282390	265636	374322	537187	422407	417047	440666	416162	334217	409345	371781	294386	1.34002	1.76061	1.64624	1.41667	1.4969	1.41366	1.1353	1.39051	1.2629
C04251	700945	716226	674353	686899	697087	729218	842569	659333	838029	692079	721265	706672	695614	1.25158	1.02282	1.05727	1.21126	0.947843	1.20473	0.994919	1.03688	1.0159
C02954	919156	912427	946039	951406	973930	970343	973399	991213	976943	958569	946385	952477	935176	1.0731	1.019	1.01171	1.04087	1.05992	1.04466	1.02501	1.01199	1.0185
C03134	991293	521569	516648	1.16475e+06	544691	1.13046e+06	1.21132e+06	649051	1.11122e+06	1.07299e+06	1.19905e+06	1.13602e+06	769716	1.52188	0.737592	0.70641	1.57372	0.843235	1.44368	1.39401	1.55779	1.4759
C17533	441824	428627	349591	464068	515512	504131	402214	456503	430334	442345	430823	436584	420775	1.17848	1.28727	1.28609	0.955888	1.08491	1.02272	1.05126	1.02388	1.03757
C07354	535327	409611	406359	671692	501268	604772	787192	466186	661914	586674	727550	657112	460405	1.35936	1.10415	1.06336	1.70978	1.01256	1.43768	1.27426	1.58024	1.42725
C10523	290382	302340	309447	312698	282930	307910	294950	288703	321496	306558	313272	309915	300159	1.03388	0.991979	1.01645	0.982646	0.961833	1.07109	1.02132	1.04369	1.0325
C13424	1.44259e+06	1.14667e+06	1.11331e+06	1.72297e+06	1.06523e+06	1.63371e+06	1.93084e+06	1.07553e+06	1.60258e+06	1.12395e+06	1.38667e+06	1.25531e+06	1.29765e+06	1.79371	0.821926	0.836771	1.48795	0.828826	1.23499	0.866142	1.0686	0.967371
C12669	465631	459192	448409	477110	1.87113e+07	523206	504073	1.91285e+06	691640	448067	475908	461988	459394	1.07392	46.5759	30.977	1.09726	4.16386	1.50555	0.975345	1.03595	1.00565
C08401	834106	878570	840389	871036	831694	850232	855136	818342	831536	843832	838049	840941	849274	0.991014	0.968868	0.987722	1.0069	0.963578	0.979113	0.993592	0.986783	0.990187
C08322	549851	217451	217600	588114	751730	606524	675998	715836	645256	582791	711469	647130	387945	1.59168	1.77213	1.79398	1.74251	1.8452	1.66327	1.50225	1.83394	1.6681
C07545	658757	647445	682285	708443	623029	665539	743979	600377	733097	637294	724464	680879	664101	0.967278	0.945613	0.94934	1.12028	0.904044	1.10389	0.959634	1.09089	1.02526
C11249	125887	99429.5	94565.5	137481	185145	136722	148742	136805	141422	129871	153034	141453	111525	1.1838	1.61199	1.46759	1.3337	1.22668	1.26807	1.1645	1.37219	1.26835
C15084	1.2033e+06	1.31602e+06	1.28133e+06	1.29588e+06	1.21241e+06	1.29509e+06	1.12533e+06	1.0466e+06	1.17805e+06	1.11844e+06	1.18419e+06	1.15132e+06	1.22175e+06	1.02848	1.05107	1.06564	0.921081	0.85664	0.964238	0.915447	0.969264	0.942356
C18659	436490	466268	489979	485151	457478	463916	488985	466004	459690	453507	461108	457307	455023	1.04037	1.15678	1.14036	1.07464	1.02413	1.01026	0.996669	1.01337	1.00502
C09160	1.91367e+06	768414	770429	5.14972e+06	866711	2.19835e+06	3.45093e+06	763284	2.20026e+06	2.55692e+06	2.10109e+06	2.329e+06	2.12525e+06	2.32179	0.379251	0.368871	1.62377	0.359149	1.03529	1.20311	0.98863	1.09587
C15607	1.77182e+06	1.86641e+06	1.93324e+06	2.03838e+06	1.983e+06	2.16491e+06	2.2265e+06	3.03432e+06	2.18492e+06	2.1046e+06	2.25112e+06	2.17786e+06	1.84524e+06	1.19682	1.6345	1.52609	1.20662	1.64441	1.18409	1.14056	1.21996	1.18026
C07956	555551	534578	538271	589749	596271	607935	632996	524799	595665	578061	617800	597930	535083	1.10278	1.03191	1.02867	1.18299	0.980782	1.11322	1.08032	1.15459	1.11745
C16625	203035	227925	230959	238642	240529	236018	229962	257448	219112	235421	243681	239551	217921	1.06547	1.16765	1.0696	1.05526	1.18138	1.00547	1.08031	1.11821	1.09926
C01854	357432	367007	322438	423636	429970	423515	392962	390858	411980	377500	412804	395152	345012	1.16175	1.14044	1.12414	1.13898	1.13288	1.1941	1.09417	1.19649	1.14533
C19333	546075	520355	523204	656037	709501	626676	633899	654369	619369	561068	616707	588888	532772	1.17838	1.2687	1.23955	1.18981	1.22823	1.16254	1.05311	1.15755	1.10533
C13154	1.13047e+06	403054	449036	1.31545e+06	1.5132e+06	1.29579e+06	1.40307e+06	1.25302e+06	1.41728e+06	1.22751e+06	1.4015e+06	1.31451e+06	786199	1.66634	1.88208	1.85136	1.78463	1.59377	1.8027	1.56132	1.78263	1.67198
C00990	279548	263737	264861	280402	285398	290088	306196	283097	279922	348558	297885	323222	270617	1.01903	1.04709	1.11001	1.13147	1.04612	1.03438	1.28801	1.10076	1.19439
C02372	854377	807904	776839	856903	814329	844086	863371	770085	911146	835937	877803	856870	806888	1.04401	1.04417	1.01013	1.07	0.954388	1.12921	1.036	1.08789	1.06194
HMDB0254500	1.28696e+06	1.31744e+06	1.3369e+06	1.36545e+06	1.34954e+06	1.40912e+06	1.31635e+06	1.34896e+06	1.32225e+06	1.35634e+06	1.30538e+06	1.33086e+06	1.30806e+06	1.0749	1.04719	1.05227	1.00634	1.03127	1.01085	1.03691	0.997955	1.01743
C08580	4.49683e+06	1.72137e+06	1.75829e+06	7.75768e+06	1.961e+06	7.22435e+06	8.42046e+06	1.99412e+06	9.11649e+06	6.38999e+06	1.0168e+07	8.27898e+06	3.20862e+06	2.21068	0.602688	0.620041	2.62433	0.62149	2.84125	1.99151	3.16896	2.58023
C08862	454210	457909	470433	461790	429576	451812	491890	422248	505467	458949	443471	451210	457628	1.00473	0.924281	0.949894	1.07487	0.922688	1.10454	1.00289	0.969065	0.985976
C07523	7.42812e+06	1.51289e+06	1.33006e+06	2.38155e+06	2.64301e+06	1.06061e+06	1.12249e+06	1.01098e+07	1.72911e+07	1.40262e+07	1.79011e+07	1.59636e+07	2.91377e+06	0.389536	0.277823	2.78169	0.385236	3.46968	5.93426	4.81376	6.14362	5.47869
C10702	2.41238e+06	2.41981e+06	2.38406e+06	2.47637e+06	2.49417e+06	2.45834e+06	2.558e+06	2.42538e+06	2.42514e+06	2.46418e+06	2.46492e+06	2.46455e+06	2.39725e+06	1.04337	1.00549	1.06069	1.06706	1.01173	1.01163	1.02792	1.02823	1.02807
C08897	408380	404685	426461	442811	389423	415994	465023	375264	437309	398340	452825	425582	414252	0.969248	0.947538	0.951273	1.12256	0.905885	1.05566	0.961589	1.09312	1.02735
C05315	2.92548e+06	2.93841e+06	2.93821e+06	3.1612e+06	2.6954e+06	3.07789e+06	3.20389e+06	2.8336e+06	3.15703e+06	2.86648e+06	3.22554e+06	3.04601e+06	2.93365e+06	1.04911	0.933193	0.966593	1.09212	0.965894	1.07614	0.977103	1.0995	1.0383
C06523	418885	405687	329404	484602	488747	477957	381331	432801	413215	412844	439970	426407	398248	1.22391	1.28947	1.28828	0.957521	1.08676	1.03758	1.03665	1.10476	1.07071
C03283	560696	532453	466168	595355	629011	618257	614025	631714	638948	600212	621003	610607	529972	1.12691	1.20276	1.15975	1.1586	1.19198	1.20563	1.13254	1.17177	1.15215
C15481	81248.3	72191.9	76225.3	79709.2	82147.8	81620.3	83261.8	83370.1	78774.2	80211	81121.7	80666.3	78027.5	1.08239	1.05959	1.06737	1.06708	1.06847	1.00957	1.02798	1.03966	1.03382
C14112	402419	350671	347309	477662	590941	489194	484802	478671	492225	419683	481748	450715	368735	1.23867	1.54281	1.42892	1.31477	1.29814	1.3349	1.13817	1.30649	1.22233
C01672	790795	791969	820046	840446	813395	864295	767010	810560	828601	810183	782944	796563	813487	1.02735	1.00851	0.959491	0.942867	0.996402	1.01858	0.995938	0.962453	0.979196
C15617	987828	957502	949238	982459	959262	1.00909e+06	965497	1.0113e+06	933185	955422	1.01678e+06	986100	968310	1.03856	1.05839	1.09883	0.997095	1.0444	0.963726	0.98669	1.05006	1.01837
C06913	1.37946e+06	1.28986e+06	1.31276e+06	1.41145e+06	1.3941e+06	1.37702e+06	1.38731e+06	1.35477e+06	1.3205e+06	1.32061e+06	1.39424e+06	1.35743e+06	1.3251e+06	1.00532	1.03453	1.05769	1.04695	1.02239	0.996527	0.996617	1.05218	1.0244
C09246	1.01164e+06	1.03136e+06	1.01233e+06	1.05547e+06	951565	1.04522e+06	1.04636e+06	1.01173e+06	1.05009e+06	1.00859e+06	1.05059e+06	1.02959e+06	1.01435e+06	1.05097	1.0031	0.956374	1.03155	0.997416	1.03523	0.994314	1.03572	1.01502
C05421	218783	172526	173935	247706	349266	260727	272611	289591	250470	221627	281064	251345	194337	1.33438	1.64882	1.59464	1.40278	1.49015	1.28885	1.14043	1.44627	1.29335
C19013	1.03459e+06	1.14266e+06	1.14571e+06	1.18208e+06	1.1669e+06	1.21783e+06	1.18118e+06	1.24898e+06	1.12445e+06	1.18161e+06	1.18219e+06	1.1819e+06	1.08882e+06	1.12119	1.18818	1.13937	1.08483	1.1471	1.03273	1.08522	1.08576	1.08549
C12027	137808	116227	121489	167007	227674	174539	183077	188345	178228	143406	164444	153925	127393	1.38613	1.71989	1.55407	1.4371	1.47846	1.39903	1.12569	1.29084	1.20826
C18504	593467	5.05596e+06	5.67689e+06	4.3364e+06	1.44302e+06	3.8348e+06	3.14886e+06	3.13125e+06	903986	1.42161e+06	1.54387e+06	1.48274e+06	2.96914e+06	0.35446	0.97026	0.99923	1.06053	1.0546	0.30446	0.478794	0.519972	0.499383
C02243	1.01817e+06	1.01441e+06	1.03402e+06	1.10624e+06	967679	1.03925e+06	1.16173e+06	955725	1.0925e+06	1.03373e+06	1.16958e+06	1.10166e+06	1.02985e+06	1.04231	0.952178	0.918489	1.12806	0.928023	1.06083	1.00377	1.13568	1.06972
C02075	233101	85692.9	94159.2	263431	1.09653e+06	269789	270125	280775	452335	219409	285301	252355	157587	1.61336	2.72057	4.15604	1.71414	1.78172	2.87038	1.3923	1.81043	1.60137
C17967	1.45291e+06	1.51495e+06	1.5244e+06	1.5272e+06	1.59146e+06	1.55588e+06	1.5428e+06	1.52442e+06	1.59074e+06	1.53908e+06	1.53954e+06	1.53931e+06	1.50901e+06	1.00427	1.00489	1.04778	1.02239	1.01021	1.05416	1.01993	1.02023	1.02008
C11918	435169	413249	361803	458086	484706	479843	476558	490288	495902	465838	481974	473906	411323	1.12691	1.20276	1.15975	1.1586	1.19198	1.20563	1.13254	1.17177	1.15215
C09801	4.13378e+06	1.00072e+06	1.09334e+06	3.61278e+06	2.29974e+07	4.15124e+06	3.46041e+06	3.50406e+06	3.67452e+06	3.29045e+06	3.88237e+06	3.58641e+06	2.3194e+06	2.9089	7.17672	2.86592	1.49195	1.51077	1.58426	1.41867	1.67387	1.54627
C04282	610000	600895	628355	651330	680656	669781	673871	658659	625963	586381	629205	607793	606590	1.06169	1.13915	1.12337	1.11092	1.08584	1.03194	0.966685	1.03728	1.00198
C19194	1.77037e+06	1.86475e+06	1.81821e+06	1.85313e+06	1.7763e+06	1.83506e+06	1.81501e+06	1.75672e+06	1.79395e+06	1.85179e+06	1.8068e+06	1.82929e+06	1.81277e+06	1.00112	0.974953	1.01254	1.00124	0.969081	0.989617	1.02152	0.996708	1.00912
C18178	310166	305658	298266	300567	298609	298330	303990	275448	344601	306735	338078	322406	300797	1.03934	0.91728	0.817153	1.01062	0.915729	1.14563	1.01974	1.12394	1.07184
C15514	65111.7	49068.4	49501.3	64774.5	214132	71162.4	94609	136740	76970.9	76303.4	86532.3	81417.8	56828.2	1.35587	3.17256	2.30164	1.66482	2.4062	1.35445	1.3427	1.5227	1.4327
C06605	1.49618e+06	1.58677e+06	1.5149e+06	1.55981e+06	1.52152e+06	1.59449e+06	1.51338e+06	1.45178e+06	1.54593e+06	1.53507e+06	1.52805e+06	1.53156e+06	1.51637e+06	1.01401	0.986682	0.997406	0.998026	0.957402	1.0195	1.01233	1.0077	1.01002
C12108	339692	356470	380413	310143	362125	367780	275205	305304	275414	317777	326692	322235	354368	0.946127	0.959561	1.51307	0.776608	0.861544	0.777195	0.896743	0.921899	0.909321
C19786	1.51257e+06	1.44548e+06	1.35533e+06	1.45003e+06	1.58661e+06	1.53078e+06	1.59227e+06	2.73885e+06	1.54141e+06	1.42093e+06	1.46301e+06	1.44197e+06	1.43322e+06	1.02054	1.10132	1.06069	1.11098	1.91098	1.07549	0.991428	1.02079	1.00611
C16837	127637	132761	147427	126693	142857	127100	152870	150221	136288	177490	146666	162078	135756	0.96219	1.02116	0.949796	1.12606	1.10655	1.00392	1.30742	1.08037	1.19389
C04638	939847	881268	881144	1.10485e+06	1.19489e+06	1.07916e+06	1.06757e+06	1.10204e+06	1.04939e+06	961713	1.04304e+06	1.00238e+06	903534	1.17019	1.28258	1.2451	1.18155	1.2197	1.16143	1.06439	1.15441	1.1094
C10094	874883	863185	875478	912780	850515	903919	879399	874960	908128	872239	908561	890400	868579	1.06143	1.01309	1.00081	1.01246	1.00735	1.04553	1.00421	1.04603	1.02512
C03017	216467	194154	185582	253320	327016	280196	266831	279272	268470	225887	263090	244488	202498	1.2849	1.49416	1.52995	1.3177	1.37914	1.32579	1.1155	1.29922	1.20736
C00495	680749	538465	485412	4.64619e+06	6.881e+06	8.23421e+06	753909	1.32596e+06	740860	1.86677e+06	1.50603e+06	1.6864e+06	592755	15.3939	4.23991	29.0678	1.27187	2.23694	1.24986	3.1493	2.54073	2.84501
C15971	108429	97520.1	94671.8	130181	117338	129375	134307	115737	154823	125220	162148	143684	100593	1.17521	3.93604	1.23544	1.33515	1.15055	1.5391	1.24482	1.61192	1.42837
C11923	3.33246e+06	3.34515e+06	3.43385e+06	3.33159e+06	3.50203e+06	3.47901e+06	3.40385e+06	3.37413e+06	3.51615e+06	3.38847e+06	3.28667e+06	3.33757e+06	3.39191e+06	1.00502	1.04237	1.01327	1.00352	0.99476	1.03663	0.998987	0.968975	0.983981
C04164	178938	169634	171186	188772	223002	195398	205185	294665	210008	182802	222011	202406	174356	1.12999	1.49613	1.16104	1.17682	1.69002	1.20448	1.04844	1.27332	1.16088
C07045	711537	738350	724022	791592	784183	772861	775305	756901	792809	757767	770862	764315	731790	1.07531	1.0809	1.11663	1.05946	1.03431	1.08338	1.0355	1.05339	1.04444
C10933	241082	310055	309750	294905	304909	299895	253913	257066	259823	254418	257881	256150	278092	1.10668	1.02956	1.12675	0.913055	0.924393	0.934308	0.91487	0.927325	0.921098
C07481	241570	203249	212730	239451	214609	233057	237443	209561	261937	235472	219540	227506	220697	0.990954	0.937228	0.929688	1.07588	0.949543	1.18686	1.06695	0.994758	1.03085
C14767	781267	757428	749366	802808	787307	821530	822982	764810	835626	794312	805406	799859	764582	1.043	1.01035	0.996337	1.07638	1.0003	1.09292	1.03888	1.05339	1.04614
C18852	284563	252387	212656	281499	333609	308061	289882	1.39805e+06	262661	270331	2.48381e+06	1.37707e+06	258386	1.16182	32.9859	1.28314	1.12189	5.41069	1.01654	1.04623	9.61278	5.3295
C18069	5.59626e+06	5.55908e+06	5.55869e+06	5.98057e+06	5.38774e+06	5.82295e+06	6.27875e+06	5.73678e+06	6.36535e+06	6.04487e+06	6.20046e+06	6.12266e+06	5.60152e+06	1.03948	0.940569	1.01186	1.1209	1.02415	1.13636	1.07915	1.10692	1.09304
C15390	467810	505970	500939	501493	623654	461468	493951	539842	487356	497308	468773	483040	490375	1.0024	1.30648	1.24072	1.00729	1.10087	0.993844	1.01414	0.955947	0.985042
C00065	318327	376188	371099	337148	372851	386842	343991	346839	336148	332084	341362	336723	351879	1.08429	1.05497	1.21219	0.977584	0.985677	0.955295	0.943745	0.970112	0.956928
C16308	689143	588713	536284	970999	1.1203e+06	960713	740072	730650	897241	825881	840978	833429	607224	1.64167	1.76006	1.87372	1.21878	1.20326	1.47761	1.36009	1.38495	1.37252
C01550	1.38484e+06	1.38569e+06	1.38828e+06	1.42598e+06	1.47368e+06	1.4397e+06	1.48308e+06	1.43275e+06	1.39728e+06	1.40934e+06	1.34932e+06	1.37933e+06	1.38719e+06	1.04041	1.01569	1.04832	1.06913	1.03285	1.00727	1.01597	0.972704	0.994335
C11136	1.30819e+07	1.62006e+06	1.59746e+06	1.10287e+07	1.61811e+06	1.24431e+07	1.42197e+07	1.53593e+06	1.45102e+07	1.451e+07	3.81463e+06	9.16229e+06	6.85193e+06	1.49462	0.226596	0.242282	2.07529	0.22416	2.11768	2.11765	0.556724	1.33719
HMDB0250338	210955	210512	212641	208423	209743	203524	212270	215598	197583	208794	205591	207192	209623	0.988566	1.06104	1.08142	1.01263	1.0285	0.942566	0.996045	0.980766	0.988406
C19136	2.98513e+06	2.93545e+06	2.96189e+06	3.1115e+06	3.46261e+06	3.33087e+06	3.40126e+06	3.18433e+06	3.32963e+06	3.0768e+06	3.34482e+06	3.21081e+06	2.96535e+06	1.10084	1.10376	1.07493	1.147	1.07385	1.12285	1.03759	1.12797	1.08278
C04144	2.13866e+06	2.07376e+06	2.05647e+06	2.19818e+06	2.16693e+06	2.24888e+06	2.25286e+06	2.10717e+06	2.28747e+06	2.17437e+06	2.20474e+06	2.18956e+06	2.09436e+06	1.04232	1.00969	0.995685	1.07568	1.00612	1.0922	1.0382	1.0527	1.04545
C08702	5.75357e+06	555865	524653	937651	624435	898689	6.57308e+06	578016	1.03902e+07	8.9152e+06	4.32949e+06	6.62235e+06	3.63745e+06	0.150189	0.160612	0.170884	1.80706	0.158907	2.85645	2.45095	1.19026	1.8206
C18544	296721	251820	229358	309706	449471	368089	364091	367107	347709	320793	356344	338568	265921	1.28168	1.64856	1.4994	1.36917	1.38051	1.30756	1.20635	1.34004	1.27319
C18470	863387	834865	845803	882457	879248	871946	880815	871936	852510	876559	864233	870396	854061	1.02276	1.02997	1.023	1.03133	1.02093	0.998185	1.02634	1.01191	1.01913
C03494	1.33406e+07	3.53811e+06	2.03455e+07	2.59906e+06	4.87898e+06	1.08226e+07	3.31186e+06	5.65295e+06	1.23166e+07	1.26416e+07	3.06561e+06	7.85359e+06	9.82864e+06	0.283786	0.467191	0.180923	0.33696	0.575151	1.25313	1.2862	0.311906	0.799052
C11052	193331	196810	184592	208546	216374	229872	242943	331088	229443	211818	245629	228724	193044	1.24826	1.64469	1.51361	1.25849	1.71509	1.18856	1.09726	1.2724	1.18483
C02636	436011	432661	424957	458966	589687	500823	490772	449022	486204	466950	485086	476018	432339	1.07997	1.11963	1.09855	1.13515	1.03859	1.12459	1.08006	1.122	1.10103
C11675	1.67656e+07	92811.9	90819.9	1.68174e+06	81825	1.34305e+06	9.17819e+06	76209.3	1.36787e+07	2.13531e+06	5.5774e+06	3.85636e+06	9.45956e+06	0.649481	0.00903792	0.0086304	0.970256	0.00805633	1.44602	0.225731	0.589605	0.407668
C15738	423589	419756	442344	459303	403926	431486	482342	389240	453596	413175	469689	441432	429679	0.969248	0.947538	0.951273	1.12256	0.905885	1.05566	0.961589	1.09312	1.02735
C05643	89825.8	86057.3	82381.2	96895	98901.5	99611.6	104854	153831	95740.6	93062.9	114125	103594	87053.5	1.16377	1.34759	1.22237	1.20448	1.76708	1.09979	1.06903	1.31097	1.19
C06665	476769	410985	370753	480399	487593	488738	494233	502991	490076	465521	503890	484706	429431	1.14453	1.18145	1.22192	1.1509	1.1713	1.14122	1.08404	1.17339	1.12872
C00830	1.02034e+07	6.60244e+06	6.10555e+06	1.92906e+06	2.47943e+06	1.98796e+07	1.9904e+07	2.44269e+06	1.87365e+07	1.84908e+07	1.78501e+07	1.81705e+07	8.26099e+06	0.30063	2.1715	0.252125	2.4094	0.29569	2.26807	2.23833	2.16077	2.19955
C16806	741090	810512	789147	1.34963e+07	673689	7.86295e+06	4.37801e+06	756868	1.55385e+06	3.13181e+06	4.45983e+06	3.79582e+06	741081	10.9859	1.01885	1.08199	5.9076	1.0213	2.09673	4.226	6.018	5.122
C07199	2.60422e+06	2.46257e+06	2.37369e+06	2.71808e+06	2.48215e+06	2.7157e+06	2.76986e+06	2.34729e+06	2.77725e+06	2.58168e+06	2.67562e+06	2.62865e+06	2.46092e+06	1.09386	1.04356	1.02481	1.12554	0.953824	1.12854	1.04907	1.08724	1.06816
C00296	44016.1	46425.6	43869.3	46484.7	47227.7	47383.7	48219.8	46401.8	44784.2	46718.3	44207.4	45462.9	44739.6	1.04276	1.03151	1.04581	1.07779	1.03715	1.001	1.04423	0.988105	1.01617
C04020	842200	220957	201248	1.90749e+06	1.12855e+07	3.27657e+06	1.316e+06	3.63492e+06	7.616e+06	5.03335e+06	2.03106e+07	1.2672e+07	621702	3.14151	9.56617	3.57568	2.11677	5.84673	12.2503	8.09609	32.6693	20.3827
C16624	222158	241853	251764	243606	237293	240633	253636	241716	238441	231099	239176	235137	234361	1.01516	1.16497	1.14843	1.08225	1.03138	1.01741	0.986081	1.02055	1.00331
C04695	1.886e+06	2.01435e+06	1.8927e+06	1.91105e+06	2.04567e+06	1.83753e+06	1.9697e+06	1.98296e+06	1.8381e+06	1.763e+06	1.77623e+06	1.76961e+06	1.90208e+06	0.925939	1.09851	1.04704	1.03555	1.04252	0.966362	0.926876	0.933833	0.930355
C09954	806963	782190	790099	802577	776865	824331	788720	826141	762325	775805	830613	803209	794684	1.03377	1.0535	1.09376	0.992496	1.03958	0.959281	0.976244	1.04521	1.01073
C00021	383500	449478	443398	452062	445491	462208	389140	414411	375122	417565	411469	414517	421111	1.03689	1.05327	1.21024	0.924079	0.98409	0.890791	0.991579	0.977103	0.984341
C07546	1.99684e+06	1.05945e+06	1.05556e+06	2.20854e+06	1.31279e+06	2.29121e+06	2.46185e+06	1.35015e+06	2.33853e+06	2.13518e+06	2.37251e+06	2.25384e+06	1.54414e+06	1.42651	0.758579	0.775511	1.59431	0.874372	1.51445	1.38276	1.53646	1.45961
C14164	1.86515e+07	1.66394e+07	1.88825e+07	1.67229e+07	1.67264e+07	1.74108e+07	1.72935e+07	1.71021e+07	1.39712e+07	1.07555e+07	1.60313e+07	1.33934e+07	1.78371e+07	1.00948	1.07841	0.948153	0.96952	0.958792	0.783264	0.602987	0.898761	0.750874
C04185	664767	277039	272817	367428	446807	376374	327518	462379	338093	312274	346208	329241	403336	1.01558	1.32578	1.59725	0.812023	1.14639	0.83824	0.774228	0.858362	0.816295
C17877	805286	898828	881370	981648	917892	1.04258e+06	917837	1.11685e+06	958473	993531	1.03578e+06	1.01466e+06	861137	1.17486	1.46828	1.38544	1.06584	1.29694	1.11303	1.15374	1.20281	1.17827
C05557	380116	365774	323219	405975	429859	424718	390597	414948	434963	430046	427659	428853	361700	1.13198	1.15142	1.18409	1.07989	1.14721	1.20255	1.18896	1.18236	1.18566
C09715	786307	752124	671556	908972	933066	845333	873383	885901	896046	856806	870880	863843	743376	1.20581	1.2025	1.16014	1.17489	1.19173	1.20537	1.15259	1.17152	1.16205
C07198	337923	315282	311762	413151	419329	413034	383237	381185	401784	368158	402588	385373	322473	1.21219	1.25895	1.17294	1.18843	1.18207	1.24595	1.14167	1.24844	1.19505
C16543	4.31374e+06	359458	360510	4.62009e+06	419760	4.53562e+06	4.5503e+06	434688	5.17175e+06	3.78493e+06	4.91373e+06	4.34933e+06	1.80276e+06	1.77659	0.242628	0.237383	2.52408	0.241124	2.8688	2.09952	2.72567	2.41259
C16280	748042	681258	705874	753415	814394	766039	836658	809752	750965	784331	773474	778903	718366	1.06393	1.12698	1.14401	1.16467	1.12721	1.04538	1.09183	1.07671	1.08427
C09951	2.75237e+06	2.72362e+06	2.76384e+06	2.82286e+06	2.84032e+06	2.91315e+06	2.74805e+06	2.78878e+06	2.76519e+06	2.80403e+06	2.7609e+06	2.78246e+06	2.74509e+06	1.05889	1.0614	1.03661	1.00108	1.01592	1.00732	1.02147	1.00576	1.01361
C14388	676242	697525	702384	698688	676031	698387	687500	673244	679348	688044	686378	687211	686347	1.02562	1.00731	0.981384	1.00168	0.980908	0.989803	1.00247	1.00004	1.00126
C05670	432701	394883	353684	453416	458111	483117	479797	469427	457631	447735	468190	457962	399120	1.11529	1.19446	1.20239	1.20214	1.17615	1.1466	1.1218	1.17306	1.14743
C21201	178445	148626	145205	202764	272293	226717	223258	235744	201611	169515	215503	192509	161386	1.33615	1.68961	1.37733	1.38338	1.46074	1.24925	1.05036	1.33532	1.19284
C05853	1.0633e+06	447509	431325	1.13862e+06	1.46477e+06	1.16201e+06	1.31243e+06	1.42059e+06	1.32051e+06	1.22836e+06	1.33418e+06	1.28127e+06	743864	1.76673	2.05142	2.01691	1.76435	1.90975	1.7752	1.65132	1.79358	1.72245
C10009	1.96126e+07	1.69399e+07	7.20687e+06	1.16461e+07	2.2841e+06	1.43144e+07	2.8256e+06	1.77199e+06	2.37322e+06	7.59577e+06	8.92205e+06	8.25891e+06	1.49586e+07	0.942066	1.11834	0.700281	0.188894	0.118459	0.158652	0.507785	0.596448	0.552117
C04197	253243	249333	246735	284451	385648	286859	313804	374850	297216	260432	314203	287317	250188	1.27813	1.47562	1.18461	1.25427	1.49827	1.18797	1.04094	1.25587	1.1484
C19485	2.03362e+06	1.48115e+06	1.48025e+06	2.09585e+06	6.39721e+06	2.13691e+06	2.82645e+06	4.27774e+06	2.29951e+06	2.29769e+06	2.58516e+06	2.44142e+06	1.77595e+06	1.19375	3.21794	1.77218	1.59152	2.40871	1.29481	1.29378	1.45565	1.37472
C16712	3.67128e+06	2.91819e+06	2.83329e+06	1.20091e+07	2.83324e+06	4.15768e+06	5.1393e+06	2.73713e+06	1.48182e+07	5.3337e+06	1.18913e+07	8.61252e+06	5.56154e+06	1.97303	0.48876	0.496871	0.924077	0.492153	2.6644	0.959033	2.13814	1.54858
C15760	471187	464670	453759	482803	537266	493579	510087	538121	470369	453413	464638	459026	463267	1.07765	1.19628	1.16229	1.10107	1.16158	1.01533	0.978731	1.00296	0.990846
C05322	1.60821e+07	1.20693e+06	1.19009e+06	1.34041e+07	1.20548e+06	1.38088e+07	1.12367e+07	1.14425e+06	6.11988e+06	6.22406e+06	6.41521e+06	6.31964e+06	9.03693e+06	1.37202	0.127995	0.136856	1.24342	0.126619	0.677207	0.688736	0.709888	0.699312
C10375	314700	309841	306612	331996	479236	343648	389957	518230	369344	321495	390453	355974	310903	1.27813	1.47562	1.18461	1.25427	1.66685	1.18797	1.03407	1.25587	1.14497
C14960	117929	124155	122903	141813	121258	127863	139846	121097	133918	128885	132878	130881	123540	1.01673	0.963749	0.909771	1.13199	0.980228	1.084	1.04326	1.07559	1.05942
C08277	265505	227228	233527	310446	404485	315016	337430	349587	339266	262074	341820	301947	247569	1.28712	1.63201	1.43676	1.36297	1.41208	1.37039	1.05859	1.38071	1.21965
HMDB0040991	1.24628e+06	1.2025e+06	1.13497e+06	1.20783e+06	1.35083e+06	1.22203e+06	1.25765e+06	1.29246e+06	1.25227e+06	1.19374e+06	1.28569e+06	1.23971e+06	1.1934e+06	1.08191	1.11297	1.12675	1.05384	1.083	1.04932	1.00028	1.07733	1.0388
C02617	278677	274374	271516	293994	424379	304312	345320	436557	327067	284695	345759	315227	275315	1.27813	1.47562	1.18461	1.25427	1.58566	1.18797	1.03407	1.25587	1.14497
C13444	612611	617445	619146	718934	1.14602e+07	698881	738588	627825	736276	682994	709503	696249	618758	1.07512	27.4512	15.3203	1.19366	1.01465	1.18993	1.10382	1.14666	1.12524
C04692	806954	775582	741386	836097	721561	788745	858006	745244	874989	831397	846939	839168	773123	1.03474	1.05409	1.00832	1.10979	0.963939	1.13176	1.07537	1.09548	1.08543
C06827	238532	259011	246522	245412	251081	216642	208057	222567	211068	226859	189422	208141	249893	0.904909	0.952447	1.01363	0.832584	0.890651	0.844633	0.907826	0.758013	0.832919
C06537	1.32893e+07	1.37882e+07	1.30596e+07	1.38892e+07	1.45866e+07	1.10834e+07	1.27157e+07	1.30427e+07	1.24117e+07	1.38755e+07	1.40184e+07	1.39469e+07	1.24835e+07	1.15505	1.0815	1.14009	1.01861	1.04479	0.994252	1.11151	1.12295	1.11723
C03657	238607	242901	227821	257386	267047	283705	299838	408626	283177	261424	303153	282289	238253	1.24826	1.64469	1.51361	1.25849	1.71509	1.18856	1.09726	1.2724	1.18483
C05635	291156	344079	339425	308372	341027	353824	314630	317235	307457	303739	312225	307982	321845	1.08429	1.05497	1.21219	0.977584	0.985677	0.955295	0.943745	0.970112	0.956928
C00328	328005	387626	382382	347399	384188	398604	354450	357385	346369	342181	351741	346961	362578	1.08429	1.05497	1.21219	0.977584	0.985677	0.955295	0.943745	0.970112	0.956928
C14186	517640	583169	565973	549384	583936	499888	539413	520632	557172	523085	523093	523089	544638	0.93184	1.02876	1.00291	0.990407	0.955923	1.02301	0.960428	0.960442	0.960435
C07919	356997	217669	225394	647332	253379	624150	762501	256857	810229	742264	878039	810152	306168	1.81636	0.801611	0.853691	2.49047	0.838941	2.64636	2.42437	2.86784	2.6461
C07706	585915	565184	563436	683048	701154	635227	656305	665711	633952	643848	647712	645780	566293	1.18945	1.18619	1.1444	1.15895	1.17556	1.11948	1.13695	1.14378	1.14036
C00802	1.61494e+06	1.60813e+06	1.5965e+06	1.69143e+06	1.80653e+06	1.67296e+06	1.62846e+06	1.74816e+06	1.61407e+06	1.64366e+06	1.6612e+06	1.65243e+06	1.60924e+06	1.01918	1.10757	1.1095	1.01195	1.08633	1.00301	1.02139	1.03229	1.02684
C00535	1.23136e+07	866524	905871	554134	847582	1.15438e+06	1.27146e+06	953423	1.18555e+06	1.34364e+06	1.06079e+06	1.20221e+06	3.85233e+06	0.63728	0.456073	0.4383	0.330048	0.247492	0.307747	0.348786	0.275363	0.312074
C14826	1.36754e+06	1.07523e+06	1.08545e+06	1.39312e+06	1.9047e+06	1.46411e+06	1.55141e+06	1.64807e+06	1.54138e+06	1.36052e+06	1.53239e+06	1.44646e+06	1.20986e+06	1.14267	1.37777	1.38979	1.2823	1.3622	1.27401	1.12453	1.26658	1.19555
C01412	607115	542556	485951	622979	629430	663787	659226	644977	628770	615174	643278	629226	551528	1.10892	1.18764	1.19553	1.19527	1.16944	1.14005	1.1154	1.16636	1.14088
C07289	425055	174317	181515	449216	542119	486123	500396	525096	454425	450112	507274	478693	295783	1.37652	2.33128	1.77065	1.69177	1.77527	1.53635	1.52177	1.71502	1.61839
C00355	108247	105741	107009	112707	115943	110510	113296	112633	112615	109925	108933	109429	107932	1.03416	1.05698	1.0218	1.0497	1.04356	1.04339	1.01847	1.00927	1.01387
C11711	68328.1	65166.9	62641.4	71385.3	68371.1	70986.2	69319.1	69979.1	71875.9	66068.3	65891	65979.7	65922.9	1.08106	1.02909	1.0416	1.05152	1.06153	1.0903	1.0022	0.999516	1.00086
C15021	3.31169e+06	4.41822e+06	2.88429e+06	2.9771e+06	1.95823e+06	1.8067e+06	2.78709e+06	1.76584e+06	2.72575e+06	2.83761e+06	1.18111e+07	7.32438e+06	3.40337e+06	0.776848	0.795557	0.992948	0.818923	0.51885	0.800897	0.833766	3.47043	2.1521
C03093	641747	685528	730666	713290	672604	704586	718927	685140	675857	672302	684868	678585	671564	1.03639	1.15235	1.136	1.07053	1.02022	1.00639	1.0011	1.01981	1.01046
C18416	469200	407713	425618	560751	476110	556603	670657	493042	693337	727197	672242	699719	439978	1.31023	1.1276	1.10322	1.5243	1.12061	1.57585	1.6528	1.5279	1.59035
C18012	269962	279341	296422	283951	293567	282256	289938	296291	285044	292749	290806	291777	282160	1.00109	1.03187	1.14105	1.02757	1.05008	1.01022	1.03753	1.03064	1.03408
C17569	2.57166e+06	2.32312e+06	2.16315e+06	2.90621e+06	3.32753e+06	2.96671e+06	2.74137e+06	2.65181e+06	2.96925e+06	2.6726e+06	2.66033e+06	2.66646e+06	2.40134e+06	1.2298	1.32313	1.23134	1.1416	1.1043	1.2365	1.11296	1.10785	1.11041
C01300	989574	999002	987227	990784	967089	1.00131e+06	957400	966578	963057	956318	968040	962179	986716	0.955461	0.961209	0.980712	0.970289	0.979591	0.976022	0.969193	0.981072	0.975133
C08441	1.02679e+07	495031	7.16463e+06	6.07106e+06	1.7912e+06	6.59858e+06	1.3182e+07	1.60635e+06	1.18099e+07	1.39821e+06	8.82315e+06	5.11068e+06	5.56117e+06	1.67252	0.337879	0.318856	2.37036	0.288852	2.12363	0.251424	1.58657	0.918995
C13077	396099	424538	408214	436785	417082	443551	477515	399760	478790	439269	430870	435070	409436	1.13345	0.993647	0.916971	1.16627	0.976369	1.16939	1.07286	1.05235	1.06261
C08737	1.49399e+06	1.4815e+06	1.5442e+06	1.61463e+06	1.35773e+06	1.6669e+06	1.52858e+06	1.43331e+06	1.60416e+06	1.58268e+06	1.59834e+06	1.59051e+06	1.52759e+06	1.03709	0.933003	1.02094	1.00065	0.938286	1.05013	1.03606	1.04632	1.04119
C14398	3.61199e+06	3.29184e+06	1.25555e+07	6.69344e+06	5.61016e+06	3.82487e+06	3.10066e+06	7.21723e+06	3.8679e+06	2.99779e+06	1.57525e+07	9.37515e+06	6.02065e+06	0.620911	2.0634	0.907792	0.515004	1.19875	0.642438	0.497917	2.61641	1.55717
C12098	2.04374e+06	1.61875e+06	1.64674e+06	2.6497e+06	3.98003e+06	2.65563e+06	2.82789e+06	3.05324e+06	2.76761e+06	2.36204e+06	2.90713e+06	2.63458e+06	1.8451e+06	1.37928	2.23116	2.80291	1.53265	1.65478	1.49998	1.28017	1.57559	1.42788
C00331	279722	293824	273929	321804	307984	341780	351502	479036	344939	332259	355389	343824	283286	1.23073	1.68081	1.56933	1.2408	1.691	1.21764	1.17288	1.25453	1.2137
C09078	4.04921e+06	982571	995573	3.29582e+06	909039	4.14563e+06	1.78204e+07	833892	9.87261e+06	2.04313e+06	3.16803e+06	2.60558e+06	2.32089e+06	6.4253	0.384339	0.380371	7.67825	0.359298	4.2538	0.880318	1.365	1.12266
C16910	302108	291338	288303	338067	450618	350787	338168	321669	333040	337879	325992	331935	294208	1.27001	1.46624	1.22121	1.14942	1.09334	1.13199	1.14843	1.10803	1.12823
C16223	5.09616e+06	1.28338e+06	1.23201e+06	8.43349e+06	1.33638e+06	8.08864e+06	1.01639e+07	1.30626e+06	8.76023e+06	6.00097e+06	1.039e+07	8.19549e+06	3.20992e+06	2.93531	0.400666	0.413154	3.16641	0.406943	2.72911	1.86951	3.23684	2.55317
C11695	526006	207456	206656	559466	1.06234e+06	588286	603001	699159	669887	596743	685221	640982	367375	1.64607	1.91869	1.79908	1.64138	1.90312	1.82344	1.62434	1.86518	1.74476
C17685	3.07262e+06	3.46385e+06	3.25192e+06	3.32099e+06	3.84951e+06	3.25755e+06	3.26861e+06	3.59214e+06	3.2069e+06	3.24407e+06	3.19205e+06	3.21806e+06	3.2352e+06	0.98805	1.22928	1.18602	1.01033	1.11033	0.991252	1.00274	0.986662	0.994702
C11990	608606	605510	580794	594161	643296	625665	599723	558239	659479	654788	711040	682914	602396	1.01108	1.08733	1.0416	0.995563	0.926697	1.09476	1.08697	1.18035	1.13366
C11985	4.57553e+06	739381	753268	3.87233e+06	2.3652e+06	3.40203e+06	1.7433e+07	5.56194e+06	2.64801e+06	8.60429e+06	6.11424e+06	7.35926e+06	5.20874e+06	0.345531	0.571353	1.3004	3.34687	1.06781	0.508378	1.6519	1.17384	1.41287
C00986	727478	558537	515639	917525	1.24638e+06	894587	747782	990929	764804	731265	865666	798466	616388	1.72728	1.81706	2.05411	1.21317	1.60764	1.24078	1.18637	1.40442	1.29539
C05366	1.13159e+06	868806	802077	1.42721e+06	1.93875e+06	1.39153e+06	1.16318e+06	1.54139e+06	1.18965e+06	1.13748e+06	1.34655e+06	1.24201e+06	968139	1.7106	1.79951	2.07684	1.20146	1.59212	1.2288	1.17492	1.39086	1.28289
C15970	390343	384808	411281	385677	462293	456879	433966	401992	428173	418042	442062	430052	391192	1.14086	1.07388	1.01782	1.10934	1.02761	1.09453	1.06864	1.13004	1.09934
C00939	913081	965793	952319	1.05303e+06	960982	1.10011e+06	1.19473e+06	915636	1.02522e+06	964596	1.03069e+06	997643	923672	1.18954	1.00471	1.07144	1.29346	0.9913	1.10994	1.04431	1.11586	1.08008
C01279	453657	443389	435890	476489	489953	443105	452498	494607	457709	470315	462968	466642	444223	1.08138	1.06244	1.07821	1.01863	1.11342	1.03036	1.05874	1.0422	1.05047
C01444	1.52572e+06	1.60716e+06	1.61145e+06	1.75525e+06	1.70756e+06	1.8642e+06	1.91724e+06	2.61285e+06	1.88144e+06	1.81227e+06	1.93844e+06	1.87536e+06	1.57562e+06	1.20693	1.64831	1.53899	1.21681	1.6583	1.19409	1.1502	1.23027	1.19023
C14307	559413	515375	418467	615626	620892	607184	496311	568682	524938	531435	558927	545181	512860	1.20736	1.27203	1.27086	0.967732	1.10884	1.02355	1.03622	1.08982	1.06302
C02009	164233	141503	146552	206454	257026	211439	198713	201404	203703	174827	201082	187954	153925	1.30354	1.48055	1.44936	1.29097	1.30846	1.32339	1.13579	1.30636	1.22108
C09829	1.69876e+07	149999	148364	8.75452e+06	180947	5.93751e+06	2.8708e+06	184161	3.41657e+06	2.55995e+06	3.28773e+06	2.92384e+06	4.80987e+06	0.480038	0.0368578	0.0370816	0.596856	0.0382882	0.710324	0.532229	0.683538	0.607883
C16392	1.03312e+06	808109	792413	835987	1.42131e+06	861268	807799	888636	1.01616e+06	835652	836061	835857	838334	1.02984	1.93533	1.17216	0.963576	1.06	1.21212	0.996801	0.997289	0.997045
C07402	747458	277461	276373	1.23874e+06	286785	1.16656e+06	1.34923e+06	288885	1.43669e+06	1.00632e+06	1.6013e+06	1.30381e+06	519720	2.33583	0.573073	0.561365	2.59607	0.555848	2.76436	1.93628	3.08107	2.50867
C04297	169505	166593	159499	199347	234843	217727	202845	218288	215922	189365	204188	196777	166323	1.23699	1.42971	1.39147	1.21958	1.31243	1.2982	1.13854	1.22766	1.1831
C08280	335856	340204	367560	369183	305400	355705	346468	312209	2.29969e+06	1.54667e+06	2.29793e+06	1.9223e+06	348730	7.9139	0.893975	0.899336	0.993515	0.895274	6.59448	4.43515	6.58944	5.51229
C10562	1.01773e+06	1.11093e+06	1.09441e+06	1.13378e+06	1.30413e+06	1.07164e+06	1.09369e+06	1.20265e+06	1.03568e+06	1.04506e+06	1.0213e+06	1.03318e+06	1.07357e+06	1.01651	1.21442	1.22019	1.01874	1.12024	0.964711	0.973443	0.951315	0.962379
C03592	4.47632e+06	2.56616e+06	2.25591e+06	7.11992e+06	9.01584e+06	7.71652e+06	4.39266e+06	5.15478e+06	6.66248e+06	3.99838e+06	5.28055e+06	4.63947e+06	3.04563e+06	2.43115	2.86437	2.71838	1.44228	1.69252	2.18755	1.31283	1.73381	1.52332
C00896	866915	865095	890698	868811	882117	886972	872318	890303	877901	879659	873823	876741	868205	0.980863	1.05277	1.11429	1.00474	1.02545	1.01117	1.01319	1.00647	1.00983
C09680	400238	406011	389953	449561	609496	453366	495951	659090	473332	411599	505170	458384	398398	1.26855	1.46455	1.17572	1.24486	1.65435	1.18809	1.03314	1.268	1.15057
C11283	1.18672e+06	1.31069e+06	1.34486e+06	1.3559e+06	1.33849e+06	1.39691e+06	1.35486e+06	1.44129e+06	1.2898e+06	1.35536e+06	1.35602e+06	1.35569e+06	1.25659e+06	1.11435	1.18093	1.14414	1.0782	1.14699	1.02642	1.0786	1.07913	1.07886
C11149	468530	442241	491098	469960	478334	486195	513191	500403	469156	591239	499263	545251	465410	0.993089	1.02043	1.08175	1.10266	1.07519	1.00805	1.27036	1.07274	1.17155
D04563	1.55003e+07	1.51989e+07	1.63261e+07	1.33359e+07	1.40668e+07	1.29774e+07	1.60144e+07	1.44258e+07	1.46076e+07	1.48298e+07	1.43191e+07	1.45745e+07	1.53537e+07	1.00188	0.886791	0.841102	1.04303	0.939566	0.951408	0.965876	0.932618	0.949247
C22165	1.43619e+06	726575	696821	4.456e+06	720313	2.99008e+06	3.41903e+06	681300	4.56625e+06	1.21769e+06	8.20198e+06	4.70984e+06	1.24399e+06	2.7637	0.544549	0.579796	2.74844	0.547674	3.67065	0.978857	6.59329	3.78608
C08211	449966	150817	165603	477143	575367	512159	525826	591111	510827	487571	492951	490261	299953	1.59495	1.81518	1.817	1.75303	1.97068	1.70303	1.62549	1.64343	1.63446
C04586	88038.4	89665.9	88325.2	93625.3	92112.5	89554.6	92093.7	91014.6	88506.8	85654.7	89199.9	87427.3	87838	1.03462	1.04274	1.06837	1.04845	1.03616	1.00761	0.975143	1.0155	0.995324
C16395	2.9877e+06	1.62071e+06	1.70699e+06	2.00366e+06	2.43048e+06	2.10001e+06	1.52781e+06	3.38077e+06	1.96138e+06	2.43633e+06	2.29381e+06	2.36507e+06	1.95442e+06	0.787165	0.874581	1.16831	0.781719	1.72981	1.00356	1.24657	1.17365	1.21011
HMDB0303857	1.03118e+06	1.05989e+06	1.00978e+06	1.05484e+06	1.08298e+06	1.04931e+06	1.07072e+06	1.05604e+06	1.01933e+06	1.01471e+06	1.09219e+06	1.05345e+06	1.03949e+06	1.01329	0.96937	1.0064	1.03005	1.01592	0.980612	0.976167	1.0507	1.01343
C16931	512140	515471	503025	499541	493959	499944	501935	491797	504456	509263	502698	505981	507938	1.00196	1.0046	0.954451	0.988181	0.968222	0.993144	1.00261	0.989684	0.996146
C08750	444502	426683	447112	449649	456917	464393	1.41858e+06	438144	712286	452625	448799	450712	442600	1.82542	1.00061	0.987671	3.20511	0.989932	1.60932	1.02265	1.01401	1.01833
C09870	822320	877624	869676	950447	888453	984699	1.10038e+06	843328	941334	787767	1.00799e+06	897876	840203	1.13852	1.01463	1.08486	1.30966	1.00372	1.12037	0.937591	1.19969	1.06864
C18818	664101	95083.8	97356.8	796120	6.02493e+06	1.26438e+06	1.16711e+06	1.96194e+06	811048	176158	808304	492231	310851	1.49868	18.1769	32.4028	3.75458	6.31151	2.60912	0.566697	2.6003	1.5835
C00788	170321	195049	166310	181865	207375	213143	187987	192212	182400	172587	178423	175505	180973	1.26577	1.1553	1.25933	1.03876	1.0621	1.00788	0.953665	0.98591	0.969788
C15622	626639	267994	279807	862262	312150	776853	856230	303514	956174	719538	1.14054e+06	930038	425974	1.58367	0.720887	0.741985	2.01005	0.712518	2.24468	1.68916	2.67748	2.18332
C20144	1.45927e+06	1.42231e+06	1.42656e+06	1.3485e+06	1.54125e+06	1.40011e+06	1.47794e+06	1.49305e+06	1.39026e+06	1.35831e+06	1.37434e+06	1.36632e+06	1.42818e+06	0.917476	1.03957	0.990343	1.03485	1.04543	0.97345	0.95108	0.962304	0.956692
C09910	475078	579202	514506	519923	556451	552414	513380	517630	506584	525705	509455	517580	519762	1.09553	1.06591	1.22476	0.987722	0.995899	0.974647	1.01144	0.980171	0.995803
C05771	339337	280628	228761	372189	452596	381250	331761	468369	342473	316320	350694	333507	299006	1.38769	1.81154	2.18248	1.10955	1.56642	1.14537	1.0579	1.17286	1.11538
C19380	400294	356309	372647	397854	391256	367955	399553	350035	368015	367477	397194	382336	371438	1.07356	1.03641	1.09337	1.07569	0.942377	0.990782	0.989335	1.06934	1.02934
HMDB0000706	3.20069e+06	3.07626e+06	3.02014e+06	3.31629e+06	2.93916e+06	3.17658e+06	3.42523e+06	3.12957e+06	3.47248e+06	3.29764e+06	3.38252e+06	3.34008e+06	3.10056e+06	1.02447	1.04252	0.997246	1.10471	1.00936	1.11995	1.06356	1.09094	1.07725
C09010	227555	224041	221707	240061	346528	248487	281972	356472	267067	232468	282330	257399	224809	1.27813	1.47562	1.18461	1.25427	1.58566	1.18797	1.03407	1.25587	1.14497
C18731	881589	755454	637160	937356	1.12465e+06	947363	769079	1.07265e+06	799274	809167	851026	830096	787127	1.34249	1.70997	2.06011	0.97707	1.36274	1.01543	1.028	1.08118	1.05459
C07373	1.73188e+06	1.74548e+06	1.75217e+06	1.83959e+06	1.85537e+06	1.84928e+06	1.82273e+06	1.777e+06	1.78973e+06	1.75527e+06	1.761e+06	1.75813e+06	1.74241e+06	1.06771	1.04105	1.05236	1.0461	1.01985	1.02716	1.00738	1.01067	1.00902
C14222	2.75115e+06	2.82287e+06	2.84149e+06	2.82702e+06	2.68077e+06	2.77737e+06	2.73302e+06	2.66972e+06	2.76378e+06	2.79923e+06	2.78212e+06	2.79067e+06	2.78479e+06	1.00238	0.984482	0.994738	0.98141	0.95868	0.992458	1.00519	0.999041	1.00211
C08610	3.33443e+06	351142	341992	6.59616e+06	1.13397e+07	4.23657e+06	6.0639e+06	5.82598e+06	4.60831e+06	4.1924e+06	5.36554e+06	4.77897e+06	1.38985e+06	4.72853	6.92271	6.68822	4.36298	4.1918	3.31568	3.01644	3.86051	3.43847
C14866	3.28704e+06	3.00805e+06	3.28713e+06	3.68055e+06	3.60038e+06	3.5543e+06	3.44458e+06	3.45898e+06	3.45765e+06	3.38969e+06	3.32793e+06	3.35881e+06	3.09045e+06	1.19474	1.12016	1.13994	1.11459	1.11925	1.11882	1.09683	1.07685	1.08684
C02604	407665	468142	401513	526922	496355	510162	449950	460061	441641	448167	466578	457373	434345	1.26232	1.15215	1.25589	1.03593	1.05921	1.0168	1.03182	1.07421	1.05302
C07501	151373	144705	141105	158146	155054	157262	153600	155055	159233	147864	151499	149681	146711	1.07615	1.07548	1.03687	1.04695	1.05688	1.08535	1.00786	1.03264	1.02025
C15497	74675.1	73874	72647.3	76209.1	74553.7	76186.1	74155.8	76288.3	75074.3	68693.9	69429.5	69061.7	74568	1.0189	1.01224	0.986908	0.994473	1.02307	1.00679	0.921225	0.93109	0.926158
C08402	185621	215011	212174	217022	196162	210724	196123	187686	194426	190102	205913	198007	195208	1.13907	1.12625	1.19605	1.00469	0.96147	0.995995	0.973844	1.05484	1.01434
C06936	749095	758203	731732	774384	702332	754070	789444	713931	767344	787308	742744	765026	744355	1.03945	0.933897	0.984172	1.06057	0.959127	1.03088	1.05771	0.997836	1.02777
C07310	986114	1.04304e+06	1.02849e+06	1.13726e+06	1.03785e+06	1.18811e+06	1.19527e+06	991497	1.10723e+06	1.04175e+06	1.07443e+06	1.05809e+06	997551	1.18954	1.00471	1.07144	1.1982	0.993931	1.10994	1.04431	1.07707	1.06069
C16852	856651	431376	439478	1.0144e+06	2.73608e+06	991453	1.02129e+06	1.34256e+06	1.11525e+06	894829	1.06392e+06	979376	630638	1.48427	17.0867	17.6083	1.61946	2.12889	1.76844	1.41893	1.68706	1.55299
C13299	2.30662e+06	1.22381e+06	1.21931e+06	2.55115e+06	1.51644e+06	3.24508e+06	2.99101e+06	1.56878e+06	6.77067e+06	9.72995e+06	4.1978e+06	6.96387e+06	1.88367e+06	4.62324	0.718314	0.734347	1.58786	0.832833	3.5944	5.16542	2.22852	3.69697
C03292	187361	165005	162421	194763	228049	226556	207249	226257	214136	195412	221239	208325	173971	1.24741	1.34183	1.30417	1.19128	1.30054	1.23087	1.12324	1.2717	1.19747
C11352	1.15948e+06	1.50344e+06	2.57207e+06	1.08893e+06	1.68513e+06	1.07361e+06	2.67527e+06	1.21899e+06	1.56155e+06	1.21406e+06	1.28068e+06	1.24737e+06	1.53546e+06	0.840417	0.877526	4.24198	1.74233	0.793892	1.01699	0.790683	0.834071	0.812377
C20701	1.14962e+06	556074	504424	1.34648e+06	534952	1.30165e+06	1.39148e+06	508661	1.39682e+06	1.29686e+06	1.28322e+06	1.29004e+06	868840	1.45715	0.614309	0.589488	1.60154	0.585448	1.60768	1.49263	1.47694	1.48478
C03526	264844	269610	252871	285687	296410	314900	332806	453556	314314	290169	336486	313328	264450	1.24826	1.64469	1.51361	1.25849	1.71509	1.18856	1.09726	1.2724	1.18483
C11342	91423.4	87587.9	83846.5	98618.4	100661	101383	106719	156567	97443.4	94718.1	116154	105436	88601.8	1.16377	1.34759	1.22237	1.20448	1.76708	1.09979	1.06903	1.31097	1.19
C14332	811644	814194	788518	795379	807177	844382	975635	763460	890102	801378	825770	813574	803601	1.25449	0.944628	1.00577	1.21408	0.950048	1.10764	0.997234	1.02759	1.01241
C07020	1.02459e+06	445876	457503	1.40985e+06	510385	1.2702e+06	1.51056e+06	496265	1.60512e+06	1.34535e+06	1.89344e+06	1.6194e+06	698416	1.62846	0.718903	0.739943	2.16284	0.710557	2.29822	1.92629	2.71105	2.31867
C08861	2.3632e+06	2.52538e+06	2.51363e+06	2.52937e+06	2.32108e+06	2.35656e+06	2.47293e+06	2.27775e+06	2.47135e+06	2.33801e+06	2.31373e+06	2.32587e+06	2.43537e+06	1.02263	0.912902	0.901014	1.01542	0.935278	1.01477	0.960022	0.95005	0.955036
C06087	1.25618e+06	336442	336918	1.22854e+06	1.44488e+06	1.19836e+06	1.37938e+06	1.67536e+06	1.44586e+06	1.51429e+06	1.3987e+06	1.45649e+06	805757	1.49905	1.81803	1.72063	1.7119	2.07924	1.79442	1.87934	1.73588	1.80761
C05177	1.74144e+06	1.11918e+06	1.13781e+06	2.75655e+06	1.34579e+07	2.44946e+06	3.04351e+06	9.32789e+06	2.95979e+06	2.31416e+06	3.18613e+06	2.75014e+06	1.44633e+06	1.77761	9.60398	8.72851	2.1043	6.44937	2.04642	1.60002	2.20291	1.90147
C02777	235319	223431	243227	254321	210814	252299	238979	206522	236878	236177	229921	233049	229201	1.08872	0.890286	1.07176	1.04266	0.901052	1.0335	1.03044	1.00314	1.01679
C06940	305771	263730	241525	298002	274622	337433	261432	265317	257287	351876	427390	389633	282180	0.932182	0.933638	0.941372	0.926474	0.940241	0.911784	1.24699	1.5146	1.3808
C00188	850497	799456	802140	850416	863296	857029	877510	857930	849639	805922	828407	817164	821275	1.04133	1.04741	1.04726	1.06847	1.04463	1.03454	0.981306	1.00868	0.994995
C08262	531880	506463	529607	533320	573689	528578	567970	581199	527591	524190	533998	529094	515698	1.05256	1.06454	1.1137	1.10136	1.12701	1.02306	1.01647	1.03549	1.02598
C11303	2.47376e+06	2.60111e+06	2.56243e+06	2.65462e+06	3.12985e+06	2.64405e+06	2.56075e+06	2.81588e+06	2.56341e+06	2.57073e+06	2.41431e+06	2.49252e+06	2.55012e+06	1.00197	1.26081	1.20273	1.00417	1.10421	1.00521	1.00808	0.946746	0.977414
C12600	27132.6	24029.7	23767.7	32682.3	28987.5	32480.1	33098.6	29056.3	38869	29704.6	38396.3	34050.5	25118.8	1.18155	1.05959	1.1375	1.31768	1.15676	1.54741	1.18256	1.52859	1.35558
C13906	1.61015e+06	1.53637e+06	1.55341e+06	1.60033e+06	1.57379e+06	1.58326e+06	1.60717e+06	1.46238e+06	1.56798e+06	1.57156e+06	1.60745e+06	1.58951e+06	1.57377e+06	1.02361	0.983924	1.038	1.02122	0.929219	0.996318	0.998598	1.0214	1.01
C03515	5.02076e+06	4.80683e+06	4.64936e+06	5.69832e+06	5.17924e+06	5.39767e+06	5.00332e+06	5.15883e+06	4.97765e+06	4.94194e+06	4.97843e+06	4.96019e+06	4.8745e+06	1.11165	1.07684	1.06019	1.02643	1.05833	1.02116	1.01384	1.02132	1.01758
C09529	124767	118279	119362	131624	182286	136243	154603	140389	140423	127461	133365	130413	121572	1.12999	1.49613	1.16104	1.27171	1.15479	1.15507	1.04844	1.09701	1.07273
C16448	191797	156020	156029	190137	214581	196282	228584	206659	201679	208700	202421	205561	173141	1.12069	1.23748	1.24572	1.32021	1.19359	1.16482	1.20538	1.16911	1.18724
C08668	1.66317e+06	659952	685411	1.85325e+06	735521	1.91558e+06	1.77918e+06	666042	1.88242e+06	1.83326e+06	1.85542e+06	1.84434e+06	1.20872e+06	1.56601	0.572426	0.559368	1.47195	0.551031	1.55736	1.5167	1.53503	1.52586
C16323	229982	191318	185799	255413	348194	280252	281048	288047	281523	252197	265647	258922	207816	1.29951	1.63993	1.50054	1.35239	1.38607	1.35467	1.21356	1.27828	1.24592
C00700	394399	391867	372802	415923	410404	409639	428064	455374	444537	398513	421926	410219	388966	1.05919	1.17032	1.09525	1.10052	1.17073	1.14287	1.02455	1.08474	1.05464
C08773	1.87452e+06	1.98273e+06	1.95507e+06	2.16182e+06	1.98034e+06	2.25849e+06	2.45273e+06	1.87976e+06	2.10474e+06	1.98027e+06	2.24678e+06	2.11353e+06	1.89626e+06	1.18954	1.00207	1.07144	1.29346	0.9913	1.10994	1.04431	1.18485	1.11458
C15202	2.11362e+06	2.39145e+06	1.42109e+06	1.09972e+07	2.42857e+06	1.21485e+07	2.89537e+06	2.83436e+06	1.32315e+07	1.73075e+06	2.17903e+06	1.95489e+06	1.98654e+06	1.03787	0.928761	6.31033	1.45749	1.42678	6.66059	0.871237	1.09689	0.984066
C15747	1.3229e+06	1.49133e+06	1.40009e+06	1.34528e+06	5.17762e+06	1.40251e+06	1.40727e+06	1.54657e+06	1.3696e+06	1.34818e+06	1.37431e+06	1.36125e+06	1.38202e+06	0.98804	3.04921	1.73368	1.01827	1.11907	0.991013	0.975514	0.994422	0.984968
C03584	262297	258247	255557	576647	1.68426e+06	470585	446046	288498	690966	371839	415766	393803	259133	5.90346	6.36251	8.63026	1.7213	1.11332	2.66645	1.43494	1.60445	1.51969
C02224	224758	193271	193184	241373	281494	257434	252738	261878	255284	222101	238048	230074	204810	1.14697	1.38524	1.31175	1.23401	1.27864	1.24644	1.08443	1.16229	1.12336
C17251	337828	340303	334008	348887	377311	344154	345006	355106	340297	341350	338284	339817	335843	1.09633	1.19425	1.13586	1.02728	1.05736	1.01326	1.0164	1.00727	1.01183
C19518	1.0441e+06	902640	892455	1.22741e+06	1.52807e+06	1.27983e+06	1.24886e+06	1.3573e+06	1.31172e+06	1.07843e+06	1.23791e+06	1.15817e+06	961070	1.25995	1.52105	1.51995	1.29945	1.41228	1.36486	1.12211	1.28806	1.20509
C07127	646623	648655	622092	633665	643064	672705	777272	608236	709129	638444	657877	648161	638689	1.25749	0.946886	1.00817	1.21698	0.952319	1.11029	0.999617	1.03004	1.01483
C14416	274998	307642	315679	300551	310746	307106	272708	261987	264797	264696	264663	264679	291052	1.11245	1.58896	1.20426	0.936972	0.900138	0.909793	0.909446	0.909332	0.909389
C15900	1.00213e+06	899245	877827	1.06326e+06	1.22722e+06	1.05371e+06	1.07692e+06	1.05888e+06	1.05849e+06	983715	1.03917e+06	1.01144e+06	941717	1.09162	1.21703	1.22854	1.14357	1.12442	1.124	1.0446	1.10348	1.07404
C16155	7.51257e+06	1.07365e+06	1.09221e+06	8.26515e+06	1.08787e+07	9.43852e+06	8.11808e+06	1.22578e+07	8.34448e+06	6.53174e+06	9.51872e+06	8.02523e+06	4.09685e+06	1.69472	0.941451	2.28337	1.98154	2.99201	2.0368	1.59433	2.32342	1.95888
C07318	181489	186669	206635	201721	190215	187367	181102	193760	191000	183520	180890	182205	186309	1.05648	1.1747	1.15802	0.972052	1.04	1.02518	0.985033	0.970918	0.977975
C00644	243993	246611	246481	268165	254525	277121	263730	273025	269576	266571	259870	263221	243811	1.09566	1.08128	1.11351	1.0817	1.11982	1.10568	1.09335	1.06587	1.07961
C01990	440149	527243	507562	485194	438239	507593	450845	419303	471969	428176	460022	444099	470148	1.07204	1.0447	1.16125	0.958943	0.891852	1.00387	0.910725	0.978461	0.944593
C11045	308511	303747	300583	346530	469811	365729	382288	347142	347225	333850	339877	336863	304789	1.27813	1.47562	1.19153	1.25427	1.13896	1.13923	1.09535	1.11512	1.10523
C14743	705157	676203	707419	730351	744108	740304	772375	714110	706101	879234	751413	815323	695189	1.00062	1.02817	1.08996	1.11103	1.02722	1.0157	1.26474	1.08088	1.17281
C10876	7.18823e+06	3.00372e+06	2.91633e+06	6.31312e+06	2.91629e+06	1.02e+07	6.70297e+06	2.81736e+06	4.41026e+06	3.59953e+06	3.6324e+06	3.61597e+06	4.71545e+06	1.29303	0.592499	0.609646	1.42149	0.597473	0.935278	0.763349	0.770318	0.766833
C14147	434398	446035	391869	514857	522556	514711	477579	475022	500692	458788	501693	480241	419304	1.16175	1.20657	1.12414	1.13898	1.13288	1.1941	1.09417	1.19649	1.14533
C17992	9.39423e+06	587815	554842	1.64218e+06	595068	3.39656e+06	8.2611e+06	564844	1.02016e+07	4.44111e+06	2.62118e+06	3.53115e+06	5.23023e+06	0.403019	0.10917	0.116727	1.57949	0.107996	1.95052	0.849124	0.501161	0.675142
C00931	316044	336000	314339	875490	283552	979126	1.52256e+06	310699	927995	699539	1.1375e+06	918519	324139	5.13788	0.942646	0.965782	4.69725	0.958539	2.86296	2.15815	3.5093	2.83372
C02947	236657	233003	230575	265821	360390	280549	293251	266291	266355	256094	260718	258406	233802	1.27813	1.47562	1.19153	1.25427	1.13896	1.13923	1.09535	1.11512	1.10523
C21304	1.58912e+06	1.26314e+06	1.22309e+06	1.89798e+06	1.22637e+06	1.79965e+06	2.22455e+06	1.18477e+06	1.98985e+06	1.62951e+06	1.93331e+06	1.78141e+06	1.42863e+06	1.1015	0.823586	0.837254	1.55712	0.829304	1.39284	1.14061	1.35326	1.24693
C09296	652568	646561	643769	676664	656391	647762	694791	656095	650124	629756	623046	626401	645434	1.05832	1.02365	1.04625	1.07647	1.01652	1.00727	0.975711	0.965313	0.970512
C04277	980838	945207	1.02808e+06	1.01588e+06	1.03502e+06	1.02973e+06	1.07433e+06	1.04756e+06	982150	1.23772e+06	1.04518e+06	1.14145e+06	979158	0.988169	1.01538	1.07639	1.0972	1.06986	1.00306	1.26407	1.06742	1.16575
C18935	2.34715e+06	4.29795e+06	3.98601e+06	2.74021e+06	2.92342e+06	2.69631e+06	2.72101e+06	2.25524e+06	2.69865e+06	1.16719e+06	2.57702e+06	1.87211e+06	3.3014e+06	0.777265	1.34965	0.966917	0.824201	0.683118	0.817428	0.353545	0.780584	0.567065
C14226	560107	556511	529437	590674	606673	626957	607917	646701	631311	565950	599200	582575	554922	1.05436	1.16498	1.11531	1.0955	1.16539	1.13766	1.01987	1.07979	1.04983
C14774	60836.7	54709.6	54356.7	66394.1	71692.6	66051.5	61328.8	65781.3	62617.8	56803.9	59111.3	57957.6	55245	1.18622	1.25362	1.33398	1.11012	1.19072	1.13346	1.02822	1.06999	1.0491
C14701	953283	995286	926411	993023	1.09246e+06	1.05402e+06	1.09636e+06	1.08721e+06	1.06134e+06	978384	1.00736e+06	992870	962779	1.04605	1.25559	1.08072	1.13875	1.12925	1.10237	1.01621	1.0463	1.03125
C09441	1.89628e+06	810979	846727	2.60929e+06	944599	2.31122e+06	2.79569e+06	960555	2.97068e+06	2.72149e+06	3.41875e+06	3.07012e+06	1.3194e+06	1.54722	0.705998	0.726326	2.1189	0.728023	2.25154	2.06267	2.59113	2.3269
C01617	350438	374955	370366	392513	382474	416875	378143	419123	377001	404476	379500	391988	360166	1.13454	1.22957	1.17906	1.04991	1.16369	1.04674	1.12303	1.05368	1.08835
C05909	380372	424556	402003	439202	415145	452484	410444	454924	409204	439026	438989	439008	395324	1.14735	1.21591	1.16596	1.03824	1.15076	1.03511	1.11055	1.11045	1.1105
C14602	544631	525361	469084	634919	651749	590468	610061	618805	589283	598482	602073	600278	512728	1.22115	1.2178	1.1749	1.18983	1.20689	1.14931	1.16725	1.17426	1.17075
C11114	316027	290217	303681	297599	304240	301768	291112	323537	282317	294772	325289	310030	303864	0.95934	1.079	1.12024	0.958036	1.06474	0.92909	0.970079	1.07051	1.02029
C10559	198951	201481	205421	207332	215606	202702	202997	214377	208340	200272	210527	205399	203182	1.01544	0.997164	1.04333	0.999091	1.0551	1.02539	0.985677	1.03615	1.01091
C10004	474313	534388	545936	503429	532862	458074	520877	477082	510566	479330	469184	474257	505900	0.983364	1.05463	0.989393	1.0296	0.943038	1.00922	0.947481	0.927425	0.937453
C09955	3.70983e+06	3.55641e+06	3.50997e+06	3.67513e+06	3.69481e+06	3.70566e+06	3.87846e+06	3.72133e+06	3.54658e+06	3.51864e+06	3.59022e+06	3.55443e+06	3.60482e+06	1.00982	0.986131	0.997521	1.07591	1.03232	0.983846	0.976095	0.995951	0.986023
C14843	6.34428e+06	1.31578e+06	1.29427e+06	4.387e+06	3.59021e+06	1.42787e+06	2.65748e+06	2.77563e+06	1.35524e+06	2.00825e+06	1.46394e+06	1.7361e+06	2.62192e+06	0.529785	1.77192	0.640865	1.01356	1.05862	0.516889	0.765945	0.558346	0.662146
C15724	1.34915e+06	1.41576e+06	1.42888e+06	1.56515e+06	1.25074e+06	1.54287e+06	1.47539e+06	1.27306e+06	1.40296e+06	1.40105e+06	1.48831e+06	1.44468e+06	1.40225e+06	1.06205	0.910969	0.899977	1.05216	0.90787	1.00051	0.999145	1.06138	1.03026
C20286	533870	532749	547554	535037	530802	518082	537197	545619	540635	530295	535987	533141	534424	0.981304	1.05324	1.07348	1.00519	1.02095	1.01162	0.992275	1.00293	0.9976
C10129	376292	352158	311058	399552	422139	404539	412081	423953	428808	394747	416765	405756	351223	1.14119	1.21799	1.17444	1.17328	1.20708	1.2209	1.12392	1.18661	1.15527
C10947	1.44654e+06	1.34396e+06	1.17904e+06	1.49189e+06	1.76417e+06	1.54928e+06	1.53868e+06	1.583e+06	1.60113e+06	1.56872e+06	1.56001e+06	1.56436e+06	1.34356e+06	1.32994	1.18887	1.36023	1.14522	1.17821	1.1917	1.16758	1.1611	1.16434
C06368	193608	217979	203069	210126	195748	207174	204251	199434	198760	210876	199950	205413	203784	0.991257	0.978699	1.01955	1.0023	0.978654	0.975349	1.0348	0.981189	1.008
C04670	41674	35875	36288.8	48931.2	61173.9	50586.5	40424.7	51341.4	51196.2	38262.1	44041.6	41151.9	37254.9	1.31162	1.4371	1.36502	1.08508	1.37811	1.37421	1.02703	1.18217	1.1046
C07661	289087	305830	282656	336206	285541	327345	337702	288463	317930	308088	303264	305676	293995	1.11338	0.990359	0.917096	1.14866	0.981183	1.08141	1.04794	1.03153	1.03973
C07332	429039	400156	377979	717109	365935	1.01866e+06	1.02484e+06	375329	2.04618e+06	4.65431e+06	2.68277e+06	3.66854e+06	714505	3.23368	0.518267	0.500597	1.43434	0.5253	2.86377	6.51404	3.75473	5.13439
C10350	1.47483e+06	1.43498e+06	1.51211e+06	1.65631e+06	1.2811e+06	1.53832e+06	1.56132e+06	1.39606e+06	1.5678e+06	1.46727e+06	1.57499e+06	1.52113e+06	1.47988e+06	1.06323	0.91552	0.870057	1.05503	0.94336	1.05941	0.991474	1.06427	1.02787
C19326	176762	157936	160918	186419	222122	209482	199812	216563	204962	187040	211760	199400	167916	1.18247	1.35114	1.29331	1.18995	1.28971	1.22062	1.11389	1.26111	1.1875
C17224	1.09666e+06	1.06634e+07	1.11095e+07	869475	877434	1.52774e+06	3.86675e+06	5.66115e+06	2.36529e+06	1.03581e+06	9.30283e+06	5.16932e+06	6.21636e+06	1.28908	0.207418	0.146165	0.622028	0.910685	0.380495	0.166626	1.49651	0.831567
C17208	1.13733e+06	1.17379e+06	1.19103e+06	1.20354e+06	1.16067e+06	1.18512e+06	1.21086e+06	1.15522e+06	1.20585e+06	1.19428e+06	1.20576e+06	1.20002e+06	1.16299e+06	1.04427	0.98593	1.00971	1.04116	0.993319	1.03685	1.02691	1.03678	1.03184
C09250	1.09464e+06	1.08291e+06	1.0646e+06	1.12794e+06	1.12562e+06	1.13531e+06	1.17663e+06	1.09346e+06	1.19471e+06	1.13564e+06	1.1515e+06	1.14357e+06	1.08585e+06	1.04999	1.01713	1.00302	1.0836	1.00701	1.10025	1.04585	1.06046	1.05315
C01727	850449	838090	817821	904951	818761	871496	909113	871803	967325	869487	926982	898234	832661	1.02948	0.913022	0.998113	1.09182	1.04701	1.16173	1.04423	1.11328	1.07875
C11331	426556	445351	414532	446754	481889	421315	445439	404364	426999	437788	421955	429871	430945	1.02007	1.10598	1.04013	1.03363	0.93832	0.990842	1.01588	0.979139	0.997509
C07966	931524	921691	914010	2.87774e+06	963105	2.68138e+06	2.48545e+06	936543	1.21036e+06	951524	2.9663e+06	1.95891e+06	918018	2.92559	0.99656	1.06955	2.70741	1.02018	1.31845	1.0365	3.2312	2.13385
C06924	279673	275355	272486	295044	425896	305399	346554	438117	328235	285712	346995	316353	276299	1.27813	1.47562	1.18461	1.25427	1.58566	1.18797	1.03407	1.25587	1.14497
C19391	186259	183383	181472	209212	283641	210983	230801	209581	209632	191546	199096	195321	184012	1.27813	1.47562	1.18461	1.25427	1.13896	1.13923	1.04094	1.08197	1.06146
C12552	1.59917e+06	467860	480380	1.87539e+06	1.72748e+06	1.87981e+06	2.02093e+06	1.83453e+06	1.91685e+06	1.80537e+06	1.82343e+06	1.8144e+06	1.05917e+06	1.71769	1.49832	1.38439	1.90802	1.73204	1.80976	1.7045	1.72156	1.71303
C01589	585908	561849	587787	606841	618271	615111	641758	593346	586691	730546	624341	677443	577625	1.00062	1.02817	1.08996	1.11103	1.02722	1.0157	1.26474	1.08088	1.17281
C05130	450939	335514	314367	462722	467513	493033	489645	479062	467023	456925	477800	467362	378114	1.20142	1.2867	1.29524	1.29497	1.26698	1.23514	1.20843	1.26364	1.23603
C07078	393091	401495	392919	418704	433224	415543	424272	418152	411726	412135	425865	419000	396385	1.09672	1.10243	1.10252	1.07035	1.05491	1.0387	1.03973	1.07437	1.05705
C20231	1.56638e+06	1.17816e+06	1.20715e+06	1.63555e+06	1.92186e+06	1.68352e+06	1.66745e+06	1.73221e+06	1.72441e+06	1.58066e+06	1.81122e+06	1.69594e+06	1.32939e+06	1.25396	1.37853	1.39394	1.2543	1.30301	1.29714	1.18901	1.36244	1.27573
C12312	316043	322482	311201	299075	299276	322510	314981	298996	315308	301499	316669	309084	314863	1.03948	0.910665	0.897629	1.00038	0.949607	1.00141	0.957556	1.00574	0.981646
C10931	2.58466e+06	656593	2.6677e+06	2.58615e+06	3.45129e+06	3.4607e+06	2.8249e+06	2.32531e+06	2.96321e+06	8.34768e+06	4.71664e+06	6.53216e+06	1.88326e+06	2.02198	1.62001	1.7188	1.5	1.23473	1.57345	4.43257	2.50451	3.46854
C00539	235621	250534	221192	252586	306450	218497	245346	253487	245466	246582	224943	235763	237569	1.03914	1.28958	1.29569	1.03273	1.067	1.03324	1.03794	0.946853	0.992396
C09697	1.30375e+06	553424	551133	2.54596e+06	4.62187e+06	4.61588e+06	2.37267e+06	3.05728e+06	1.09959e+07	1.44831e+06	1.09771e+07	6.21271e+06	936888	1.84855	3.02323	2.01579	2.53251	3.26323	11.7366	1.54588	11.7166	6.63122
C01987	486106	497667	448474	607024	603211	594156	583257	548340	577973	529601	579129	554365	478988	1.24974	1.22908	1.2024	1.21769	1.14479	1.20665	1.10567	1.20907	1.15737
C01053	339442	282376	274231	376977	513917	413638	414813	425144	415515	372231	400483	386357	306727	1.29951	1.63993	1.50054	1.35239	1.38607	1.35467	1.21356	1.30567	1.25961
C08954	561172	574735	549015	618801	616870	600829	667364	567282	680932	617131	641083	629107	564408	1.12194	1.03772	0.984612	1.18241	1.00509	1.20645	1.09341	1.13585	1.11463
C03205	931195	951444	943119	952233	1.17042e+06	985036	938567	1.09217e+06	944147	986339	970523	978431	946057	1.01928	1.25047	1.1657	0.992083	1.15444	0.997981	1.04258	1.02586	1.03422
C00813	1.52601e+06	1.14779e+06	1.17603e+06	1.59339e+06	1.87232e+06	1.64013e+06	1.60504e+06	1.68756e+06	1.67996e+06	1.53992e+06	1.76453e+06	1.65222e+06	1.29429e+06	1.25476	1.37942	1.39484	1.2401	1.30385	1.29798	1.18978	1.36332	1.27655
C09249	495034	40745.1	44951.7	188702	250892	5.3433e+06	1.07318e+07	900847	716664	2.5484e+06	3.50822e+06	3.02831e+06	599226	5.05444	0.491768	0.463737	17.9095	1.50335	1.19598	4.25281	5.85458	5.0537
C03767	324110	305877	317676	330974	270368	337557	353132	305830	330041	321794	340911	331353	319104	1.00046	0.909857	0.915985	1.10664	0.958401	1.03427	1.00843	1.06834	1.03838
HMDB0254339	428896	660807	596754	340063	870910	641702	743553	606839	309987	539249	610766	575008	494876	1.13503	2.03699	2.5596	1.50251	1.22625	0.626393	1.08967	1.23418	1.16192
HMDB0254869	911905	332294	353970	1.02169e+06	1.25581e+06	1.06974e+06	1.08247e+06	1.17738e+06	1.14944e+06	985097	1.09075e+06	1.03793e+06	623024	1.59502	1.90214	1.91918	1.73744	1.88978	1.84493	1.58115	1.75074	1.66595
C11810	437945	420122	335154	1.04008e+06	1.53879e+06	1.05739e+06	1.27334e+06	643169	1.99078e+06	428561	418569	423565	400239	2.1065	2.70101	11.4908	3.18146	1.60696	4.97397	1.07076	1.0458	1.05828
C16038	288370	296602	328326	320518	302236	306423	287755	307869	303483	299613	287420	293516	296029	1.05648	1.1747	1.15802	0.972052	1.04	1.02518	1.01211	0.970918	0.991513
C15694	119686	124757	120668	141772	131159	137068	157920	120129	156700	145071	136431	140751	123316	1.26001	1.12824	1.05617	1.28062	0.97416	1.27072	1.17642	1.10636	1.14139
C16765	257497	271146	241419	281981	333113	300909	331211	440160	316105	273063	337367	305215	256338	1.10302	1.48668	1.16791	1.29209	1.71711	1.23316	1.06524	1.3161	1.19067
C06996	795435	816171	821554	817371	762050	803016	790192	763875	799088	809337	804389	806863	805161	1.00238	0.984482	0.960888	0.98141	0.948723	0.992458	1.00519	0.999041	1.00211
C10080	270333	275289	275348	287711	284805	280351	286367	281951	279522	276233	266516	271375	272502	1.07323	1.03726	1.08698	1.05088	1.03468	1.02576	1.01369	0.978037	0.995865
C06386	535149	427649	381591	526793	662882	540218	466852	651130	477249	477504	500883	489193	468779	1.36835	1.69301	1.80989	0.995889	1.38899	1.01807	1.01861	1.06848	1.04355
C01541	531947	504066	519392	541885	529090	556573	518790	516202	514707	526972	513775	520374	523800	1.03437	1.02509	1.07461	0.990434	0.985495	0.982641	1.00606	0.980861	0.993459
C07704	1.58153e+06	372378	369422	4.06927e+06	455705	1.94629e+06	1.461e+06	423811	2.96846e+06	829663	2.98926e+06	1.90946e+06	1.64603e+06	2.34713	0.280766	0.270395	0.887591	0.257475	1.80341	0.50404	1.81605	1.16004
C06635	2.87077e+06	2.75394e+06	2.82102e+06	2.77558e+06	2.89502e+06	2.71006e+06	2.70211e+06	2.79913e+06	2.89039e+06	2.80925e+06	2.74375e+06	2.7765e+06	2.7994e+06	0.981856	0.993241	0.992033	0.965246	0.999903	1.0325	1.00352	0.980119	0.991819
C01023	2.3707e+06	1.24734e+06	1.23557e+06	2.85913e+06	1.34277e+06	2.81211e+06	2.95573e+06	1.58458e+06	2.75246e+06	2.61993e+06	2.93202e+06	2.77598e+06	1.84079e+06	1.52188	0.759318	0.738484	1.60568	0.860812	1.49526	1.42326	1.59281	1.50803
C11096	1.65924e+06	1.66682e+06	1.69143e+06	1.72755e+06	1.70743e+06	1.7828e+06	1.66543e+06	1.70669e+06	1.6729e+06	1.71603e+06	1.65156e+06	1.68379e+06	1.66367e+06	1.06926	1.07179	1.04676	1.00106	1.02586	1.00555	1.03147	0.992722	1.0121
C14923	708783	686570	741778	891220	616331	1.58137e+06	1.61765e+06	668807	2.56794e+06	1.22107e+06	2.99106e+06	2.10607e+06	720153	2.74642	1.2818	0.887601	2.24626	0.928702	3.56583	1.69557	4.15338	2.92447
C00008	227724	207565	212917	254829	236855	264417	224850	235873	241497	254687	245727	250207	219094	1.24401	1.03826	1.23612	1.02627	1.07658	1.10226	1.16246	1.12156	1.14201
C06773	322705	305666	297790	371423	437676	399489	372183	400518	401598	365955	374647	370301	311161	1.21318	1.40219	1.37215	1.19611	1.28717	1.29064	1.1761	1.20403	1.19006
C03047	285257	220444	213054	300188	372437	311270	372231	368639	347866	324298	358225	341262	252645	1.24181	1.4207	1.4996	1.47333	1.45912	1.37689	1.28361	1.4179	1.35076
C19705	1.11483e+06	1.05331e+06	1.07132e+06	1.14585e+06	1.09909e+06	1.17228e+06	1.17478e+06	1.06654e+06	1.17574e+06	1.11409e+06	1.13904e+06	1.12657e+06	1.08465e+06	1.07335	1.00708	0.972647	1.0831	0.983303	1.08398	1.02715	1.05015	1.03865
C18745	1.09438e+06	1.1528e+06	1.09156e+06	1.25902e+06	1.22482e+06	1.33717e+06	1.37521e+06	1.87417e+06	1.34954e+06	1.29992e+06	1.39042e+06	1.34517e+06	1.1141e+06	1.22435	1.6721	1.5612	1.23437	1.68223	1.21133	1.1668	1.24802	1.20741
C08899	774486	673559	702547	1.11609e+06	785891	1.02661e+06	1.1164e+06	813841	1.14446e+06	1.70543e+06	1.18315e+06	1.44429e+06	787101	1.20894	1.04042	1.01793	1.41837	1.03397	1.45402	2.16673	1.50317	1.83495
C08855	179163	179449	178005	181247	186518	176229	199362	169606	189326	181741	172904	177322	178839	1.10472	1.03651	1.00107	1.11475	0.948372	1.05864	1.01622	0.96681	0.991517
C05377	679102	521395	481349	856510	1.1635e+06	835098	698056	925033	713945	682637	808100	745368	575399	1.72728	1.81706	2.05411	1.21317	1.60764	1.24078	1.18637	1.40442	1.29539
C06536	142678	77650	79989.4	164396	112616	154860	193465	9.71198e+06	191878	167449	184173	175811	114162	1.35216	15.0696	8.23556	1.69466	85.0722	1.68075	1.46677	1.61326	1.54002
C17854	1.98085e+06	2.00494e+06	2.02279e+06	2.04773e+06	1.92449e+06	2.05312e+06	2.11255e+06	1.95736e+06	2.10155e+06	2.0819e+06	2.05447e+06	2.06819e+06	1.99269e+06	1.02674	0.976742	1.00083	1.06015	0.982271	1.05463	1.04477	1.03101	1.03789
C14325	636281	618088	619620	650886	561112	673262	660604	602299	676390	618645	616291	617468	620871	1.09336	0.941459	0.850102	1.064	0.970088	1.08942	0.996415	0.992624	0.99452
C05430	127262	44124.5	43888.5	132984	184901	137406	145891	169155	133492	127581	153567	140574	84399.5	1.52016	2.02062	1.64831	1.72857	2.00422	1.58167	1.51163	1.81953	1.66558
C11803	316855	267922	266169	328176	368880	345524	354585	338825	333453	329792	328113	328953	297002	1.15864	1.2819	1.22684	1.19388	1.14082	1.12273	1.1104	1.10475	1.10758
C08185	239156	249111	248906	253534	234137	249576	244946	235773	249665	248825	242426	245626	245119	1.00861	1.01405	0.987033	0.999296	0.961871	1.01855	1.01512	0.989015	1.00207
C15877	958029	753250	729681	893404	1.33434e+06	926961	989850	1.15455e+06	1.07981e+06	953112	1.07351e+06	1.01331e+06	810418	1.12658	1.34363	1.26122	1.22141	1.42464	1.33241	1.17607	1.32464	1.25036
C04864	375790	394771	391777	399300	371539	395406	383432	371169	379583	399011	389317	394164	387147	1.01006	0.967092	0.984774	0.990403	0.958728	0.980462	1.03064	1.00561	1.01812
C14318	44361.8	37364.5	42165	37290.8	35908.7	37288.2	38281.6	37028.3	36901.9	37925	35279.2	36602.1	41274.2	0.912526	0.892082	0.961213	0.927495	0.897128	0.894066	0.918855	0.854751	0.886803
C18145	1.36515e+06	1.07172e+06	1.07583e+06	1.1295e+06	1.13919e+06	1.13545e+06	1.11915e+06	1.10159e+06	1.36132e+06	1.07615e+06	1.08125e+06	1.0787e+06	1.15369e+06	1.06505	0.965381	0.975874	0.970063	0.95484	1.17997	0.932792	0.937209	0.935001
C16891	181270	159632	163801	204661	232101	217839	194403	222047	216455	188320	201841	195080	170272	1.16978	1.41279	1.33784	1.14172	1.30407	1.27123	1.10599	1.1854	1.1457
C18831	1.67492e+06	1.01047e+06	1.20014e+06	1.61647e+06	5.11298e+06	1.19132e+06	2.39533e+06	7.56117e+06	4.50085e+06	4.36033e+06	2.71394e+06	3.53713e+06	1.31588e+06	3.20592	1.87588	7.19347	1.82033	5.74609	3.42041	3.31362	2.06245	2.68803
C10921	324354	366290	341682	396683	370810	410979	459261	351976	389107	328786	420698	374742	340396	1.17289	1.04525	1.11761	1.3492	1.03402	1.1431	0.965893	1.23591	1.1009
C05427	1.01106e+06	718632	710811	1.03705e+06	3.07191e+06	1.08258e+06	1.8947e+06	3.90235e+06	1.1863e+06	1.56063e+06	1.37682e+06	1.46873e+06	911383	1.21285	3.1443	2.86617	2.07893	4.28179	1.30165	1.71237	1.5107	1.61153
C15485	908457	928830	908924	957263	1.03195e+06	974314	955333	1.034e+06	941818	977328	981080	979204	913161	1.08059	1.14446	1.08046	1.04618	1.13233	1.03138	1.07027	1.07438	1.07232
C18374	233788	250145	247083	261858	255161	270932	252271	279610	251509	269839	253176	261508	240278	1.13454	1.22957	1.17906	1.04991	1.16369	1.04674	1.12303	1.05368	1.08835
C04849	592505	568752	595984	599365	609053	622163	613220	584029	613152	603333	598232	600782	589969	1.10745	1.00061	1.01028	1.03941	0.989932	1.03929	1.02265	1.01401	1.01833
C11573	2.45779e+06	2.35776e+06	2.41519e+06	2.23388e+06	2.31649e+06	2.3202e+06	2.27293e+06	2.39646e+06	2.47459e+06	2.40512e+06	2.34904e+06	2.37708e+06	2.39669e+06	0.936433	0.993241	0.992033	0.94836	0.999903	1.0325	1.00352	0.980119	0.991819
C14713	1.84734e+06	1.17791e+06	2.06356e+06	4.66907e+06	1.32709e+06	1.25823e+06	2.76365e+06	2.45754e+06	2.65369e+06	1.32005e+06	2.1252e+06	1.72263e+06	1.58021e+06	3.62346	1.09465	0.795416	1.74891	1.55519	1.67932	0.835362	1.34488	1.09012
C11022	457119	449270	473446	491597	432327	461825	505362	416608	508705	442226	473852	458039	460828	0.967278	0.923742	0.94934	1.09664	0.904044	1.10389	0.959634	1.02826	0.993949
C12332	570349	148117	132436	451239	492796	434994	484982	431552	431873	362344	438698	400521	307469	2.74562	1.79981	2.16356	1.57734	1.40356	1.40461	1.17847	1.4268	1.30264
C08117	321104	342400	341927	328040	323534	345598	299208	272251	313073	298460	316006	307233	318743	0.996829	1.07509	1.08999	0.938713	0.854139	0.982209	0.936365	0.991412	0.963889
C11490	158378	161229	145252	170843	177255	178926	184876	271230	187962	164086	201221	182654	155864	1.14605	1.45386	1.20375	1.18613	1.74017	1.20593	1.05275	1.291	1.17188
C13718	379707	444848	318630	8.82106e+06	1.09842e+06	1.06693e+06	2.17955e+06	1.78404e+06	900935	1.66465e+06	1.36464e+06	1.51464e+06	380702	3.63347	2.29307	3.00093	5.72508	4.68619	2.36651	4.37258	3.58454	3.97856
C10693	907743	758807	774564	1.217e+06	3.34184e+06	1.17476e+06	1.27893e+06	1.26875e+06	1.23466e+06	1.03718e+06	1.32482e+06	1.181e+06	828049	1.4116	4.37266	3.34814	1.54451	1.53222	1.49105	1.25256	1.59992	1.42624
C01416	238525	223024	223903	229573	217393	221258	221901	216161	215926	215936	217910	216923	228134	1.01699	0.973411	0.990712	0.972678	0.94752	0.94649	0.946533	0.955184	0.950858
C00448	1.32133e+06	247689	256277	2.3962e+06	261661	2.34651e+06	2.60908e+06	264202	3.35364e+06	682172	4.13424e+06	2.40821e+06	689256	3.86576	0.388143	0.378556	3.78537	0.383315	4.86559	0.989723	5.99813	3.49393
C18021	179626	174844	157728	204375	207435	206125	199785	213986	208492	198045	214368	206207	176346	1.11798	1.20328	1.26589	1.13292	1.21345	1.18229	1.12305	1.21562	1.16933
C18203	734852	582211	527355	926825	1.48719e+06	903655	761770	1.00097e+06	772556	738678	874441	806559	638055	1.68553	1.77315	2.00447	1.19389	1.56879	1.2108	1.1577	1.37048	1.26409
C02242	3.56326e+06	2.91099e+06	1.59369e+06	6.11634e+06	5.16746e+06	5.06835e+06	4.64787e+06	4.86488e+06	5.43468e+06	5.02849e+06	4.88397e+06	4.95623e+06	2.83694e+06	1.84081	2.06069	2.14691	1.63834	1.71483	1.91568	1.7725	1.72156	1.74703
C11203	617974	310253	336097	768773	4.51064e+06	761113	672908	1.76458e+06	860757	707189	776116	741652	469487	1.53879	8.1802	4.77089	1.43328	3.75853	1.8334	1.5063	1.65311	1.57971
C17940	130483	135504	136166	137563	132800	134008	134219	132304	134771	135384	138285	136835	133957	1.02165	1.00231	1.02224	1.00196	0.987667	1.00608	1.01066	1.03231	1.02148
C12404	750933	735616	731049	780194	777357	770901	778742	770893	753718	774980	764082	769531	740293	1.0432	1.04919	1.05657	1.05194	1.04133	1.01813	1.04686	1.03213	1.03949
C17476	1.34332e+06	297021	294663	1.79449e+06	369742	771341	708288	338046	724549	2.92661e+06	1.58117e+06	2.25389e+06	887591	4.8436	0.444373	0.399968	0.797989	0.380858	0.816309	3.29725	1.78141	2.53933
C09280	553927	557125	556831	625553	575002	626050	595798	616795	609006	602217	587078	594647	557709	1.08208	1.06788	1.09971	1.0683	1.10595	1.09198	1.0798	1.05266	1.06623
C06307	141576	120224	123264	148281	124869	148348	152697	122037	182314	170853	198409	184631	133611	1.07993	0.836341	0.864027	1.14284	0.913377	1.36451	1.27873	1.48497	1.38185
C05203	188589	209939	196799	229931	213999	244204	214985	261599	224503	232715	242611	237663	199137	1.19001	1.48721	1.4033	1.07959	1.31367	1.12738	1.16862	1.21832	1.19347
C10964	373639	361867	293824	395386	435955	426330	340142	386052	368582	368251	364336	366293	355231	1.22391	1.28947	1.28828	0.957521	1.08676	1.03758	1.03665	1.02563	1.03114
C00768	582360	503458	490947	678321	849617	712384	696566	757048	731628	601506	686114	643810	534340	1.26398	1.52591	1.52481	1.3036	1.41679	1.36922	1.1257	1.28404	1.20487
C07565	332137	309885	306425	406078	412150	405963	376676	374659	394906	361855	395696	378775	316952	1.21219	1.25895	1.17294	1.18843	1.18207	1.24595	1.14167	1.24844	1.19505
C11226	271456	214719	193175	284775	346298	291708	236812	330287	238359	242028	268329	255178	236270	1.37715	1.75411	2.11329	1.00229	1.39792	1.00884	1.02437	1.13568	1.08003
C08878	400053	427129	396562	440365	367731	1.041e+06	1.13484e+06	375966	686224	403363	1.61012e+06	1.00674e+06	408513	3.04197	0.856522	0.818149	2.77797	0.920328	1.67981	0.987393	3.94141	2.4644
C15679	555904	569339	533522	612992	611079	586215	633182	543727	674539	568648	613797	591222	556525	1.12715	1.00105	0.989185	1.13774	0.977003	1.21206	1.02178	1.10291	1.06235
C09780	1.04476e+06	866330	887644	1.12978e+06	1.41319e+06	1.15558e+06	1.16786e+06	1.22567e+06	1.16251e+06	1.05223e+06	1.24142e+06	1.14682e+06	949360	1.18513	1.3637	1.36732	1.23016	1.29105	1.22452	1.10835	1.30764	1.208
C02494	300884	344568	296343	369153	366343	376533	332092	339555	322222	330777	328099	329438	320338	1.26326	1.153	1.25683	1.0367	1.05999	1.00588	1.03259	1.02423	1.02841
C04690	224034	216975	176177	235313	261398	255627	203949	231477	218208	216023	218455	217239	212997	1.18049	1.28947	1.28828	0.957521	1.08676	1.02447	1.01421	1.02563	1.01992
C14704	383835	373586	406343	388853	395781	367123	424623	414041	388188	489201	404244	446722	384728	0.994017	1.02138	1.08276	1.10369	1.07619	1.00899	1.27155	1.05073	1.16114
C07356	79816.7	89827.9	80827.8	84536	93999.3	91313.4	86251.8	87126	84285.2	84114	85592.4	84853.2	84050	1.13821	1.12756	1.22909	1.0262	1.0366	1.0028	1.00076	1.01835	1.00956
C00472	567407	557884	564531	599531	616471	557526	569345	622327	575902	591763	582519	587141	562104	1.07528	1.05645	1.07212	1.01288	1.10714	1.02455	1.05276	1.03632	1.04454
C03007	548090	524263	468103	633592	650387	589234	608786	617511	624583	597231	607041	602136	518165	1.20581	1.2025	1.16014	1.17489	1.19173	1.20537	1.15259	1.17152	1.16205
C10072	238527	245542	245149	235729	239166	241701	254873	242527	250909	238351	236946	237648	241987	1.00414	0.997375	0.989861	1.05325	1.00223	1.03687	0.984974	0.979165	0.982069
C18128	133127	131193	128020	129007	128167	120368	314835	118226	2.81843e+06	131655	1.40394e+06	767797	214774	0.614847	0.5514	0.491211	1.46589	0.550468	13.1228	0.612991	6.53683	3.57491
C15689	154960	149790	151804	153661	151637	155509	154274	145723	151456	147769	145533	146651	153273	0.985278	1.03005	1.02308	1.00653	0.950741	0.988148	0.964093	0.949503	0.956798
C10544	321729	248964	234131	1.40295e+06	4.3056e+06	1.29139e+06	5.25531e+06	650837	3.97187e+06	1.2818e+06	4.85707e+06	3.06944e+06	275099	1.75727	28.4273	2.08979	19.1033	2.36583	14.4379	4.65942	17.6557	11.1576
C16644	641540	635492	637626	658256	686239	679366	654172	655399	662779	640632	630588	635610	644205	1.03297	1.02724	1.0613	1.01547	1.01738	1.02883	0.994454	0.978864	0.986659
C00898	103587	105265	102500	109914	106685	105135	108115	105298	103905	103970	104718	104344	102928	1.04798	1.05813	1.07036	1.0504	1.02303	1.00949	1.01013	1.0174	1.01376
C00123	289982	261247	253257	354324	424800	373228	354798	369204	353797	301255	356316	328786	274808	1.25828	1.5186	1.4538	1.29108	1.3435	1.28743	1.09624	1.2966	1.19642
C02794	38044.6	38075.8	38379.5	38883.9	38724.7	39965.7	40282.6	39359.9	41167.2	37988.5	35700.2	36844.3	38397.4	0.998255	1.01356	1.02653	1.0491	1.02507	1.07214	0.989351	0.929756	0.959554
C09674	563535	509570	305107	828152	2.05541e+06	855994	1.61672e+06	2.74098e+06	1.09999e+06	925540	1.18068e+06	1.05311e+06	545092	2.81464	3.01341	2.20084	2.96595	5.02847	2.01798	1.69795	2.16602	1.93198
C18592	284862	275887	224011	301442	332372	325034	259324	294326	281006	280754	277769	279262	270828	1.22391	1.28947	1.28828	0.957521	1.08676	1.03758	1.03665	1.02563	1.03114
C04071	1.92713e+06	1.97774e+06	1.97399e+06	2.10551e+06	2.01109e+06	2.05519e+06	2.04224e+06	2.01526e+06	2.0442e+06	2.01953e+06	1.9784e+06	1.99897e+06	1.96568e+06	1.00028	1.04014	1.04728	1.03895	1.02522	1.03995	1.0274	1.00647	1.01693
C07708	107547	113219	125727	98791.6	94403.5	91111.1	97641.4	108712	106322	48431.3	124847	86639.2	114831	0.866994	0.910629	0.949321	0.850305	0.946712	0.925896	0.421761	1.08722	0.754493
C00415	1.27788e+06	1.19361e+06	884878	1.70596e+06	1.92192e+06	1.64343e+06	1.54655e+06	1.51606e+06	1.85938e+06	1.63264e+06	1.51775e+06	1.57519e+06	1.16013e+06	1.34301	1.64389	1.6161	1.33308	1.3068	1.60273	1.40728	1.30825	1.35777
C22163	1.14e+06	1.26124e+06	651032	2.32009e+06	1.43442e+06	1.70669e+06	692740	2.59641e+06	3.0745e+06	1.42639e+06	1.07154e+06	1.24896e+06	1.27239e+06	1.17126	1.01686	1.38806	0.544442	2.04058	2.41633	1.12103	0.842146	0.98159
C18744	119540	124339	138075	118657	133795	119037	143172	140691	127643	166231	137362	151796	127144	0.96219	1.02116	0.949796	1.12606	1.10655	1.00392	1.30742	1.08037	1.19389
C17101	1.14208e+06	1.10702e+06	1.13978e+06	1.11177e+06	1.10297e+06	1.12737e+06	1.11626e+06	1.16922e+06	1.12341e+06	1.12566e+06	1.17555e+06	1.1506e+06	1.12326e+06	0.97016	1.05486	1.10213	0.993773	1.04092	1.00013	1.00214	1.04656	1.02435
C13837	2.63732e+06	2.7879e+06	2.47649e+06	2.85888e+06	3.36444e+06	2.83408e+06	2.47107e+06	3.20889e+06	2.43836e+06	2.5304e+06	2.54588e+06	2.53814e+06	2.62931e+06	1.2023	1.5314	1.84498	0.939818	1.22043	0.927377	0.962381	0.968272	0.965326
C19915	1.03793e+06	1.89303e+06	972301	655370	2.17723e+06	705870	501177	710846	508881	893906	2.29512e+06	1.59451e+06	1.56327e+06	0.527745	1.27027	0.336866	0.320596	0.454718	0.325524	0.571819	1.46816	1.01999
C11345	210623	189837	174109	219380	227529	215207	230656	226446	240018	220953	233277	227115	194772	1.15185	1.15646	1.17817	1.18423	1.16262	1.2323	1.13442	1.19769	1.16606
C08849	1.1631e+06	1.23588e+06	1.20504e+06	1.22528e+06	1.1741e+06	1.20482e+06	1.20291e+06	1.16428e+06	1.16971e+06	1.18701e+06	1.18463e+06	1.18582e+06	1.19887e+06	1.00325	0.977032	1.0147	1.00337	0.971148	0.97568	0.990107	0.988121	0.989114
C01536	583446	563599	613016	586630	597083	553848	640594	624630	585627	738017	609850	673934	581505	0.992143	1.01946	1.08072	1.10161	1.07416	1.00709	1.26915	1.04874	1.15895
C00500	91824.9	90350.2	81895.1	90713.3	93827.7	88411.2	88175	87270.9	132124	87123.1	82394.3	84758.7	85927.8	1.10382	1.02892	1.01983	1.02615	1.01563	1.53761	1.01391	0.958879	0.986395
C01239	319657	339165	326648	355089	394016	378410	361517	393369	362605	340570	348575	344573	332502	1.1244	1.15668	1.10424	1.08727	1.18306	1.09054	1.02427	1.04834	1.0363
C19917	462583	468208	443514	457455	449419	465656	470892	444495	473852	465304	461084	463194	455284	1.00507	0.942866	0.957226	1.03428	0.976303	1.04078	1.02201	1.01274	1.01737
C20692	1.94231e+06	568252	583458	2.2778e+06	2.09815e+06	2.28317e+06	2.45457e+06	2.22818e+06	2.32836e+06	2.19275e+06	2.2147e+06	2.20373e+06	1.28645e+06	1.71769	1.49832	1.38439	1.90802	1.73204	1.80991	1.7045	1.72156	1.71303
C00207	152286	153943	163021	164567	170446	152506	183812	179232	168040	211767	174991	193379	157640	1.05015	1.07907	1.14391	1.16603	1.13697	1.06597	1.34336	1.11007	1.22671
C07777	664317	667939	675921	679464	654962	690789	690920	665193	677016	665180	662004	663592	663283	1.07616	0.998407	0.988333	1.04167	1.00288	1.02071	1.00286	0.998072	1.00047
C06956	812011	838064	798058	864033	721519	859206	878860	768645	863198	791432	932430	861931	813298	1.06519	0.917204	0.828201	1.08061	0.945096	1.06135	0.973114	1.14648	1.0598
C06772	873106	878785	857566	851628	871310	852314	855708	838425	860005	868201	857009	862605	856849	1.01259	0.996273	0.973453	0.998669	0.978498	1.00368	1.01325	1.00019	1.00672
C15808	150790	127009	143422	175526	211567	191423	177218	186461	184787	151878	167482	159680	141347	1.21922	1.52974	1.49135	1.25378	1.31917	1.30733	1.0745	1.1849	1.1297
C07662	589183	519751	538174	1.52792e+06	605258	1.40093e+06	1.70678e+06	625539	1.8115e+06	1.77231e+06	2.0081e+06	1.8902e+06	692396	1.79275	0.87611	0.901336	2.46503	0.903442	2.61628	2.55968	2.90022	2.72995
C15725	1.51816e+06	1.59523e+06	1.55782e+06	1.6056e+06	1.43762e+06	1.55782e+06	1.72142e+06	1.51378e+06	1.61696e+06	1.57894e+06	1.53181e+06	1.55538e+06	1.57777e+06	0.996479	0.895345	0.917319	1.09105	0.959443	1.02484	1.00074	0.970869	0.985807
C00445	1.05978e+06	1.09015e+06	1.06899e+06	1.20096e+06	1.13297e+06	1.19518e+06	1.14471e+06	1.17752e+06	1.17055e+06	1.14968e+06	1.13815e+06	1.14392e+06	1.08277e+06	1.10897	1.05008	1.11426	1.05721	1.08751	1.08108	1.0618	1.05115	1.05648
C14859	3.093e+06	2.64241e+06	2.50971e+06	3.68996e+06	2.91447e+06	2.99141e+06	2.956e+06	2.7108e+06	2.94979e+06	3.16384e+06	3.5274e+06	3.34562e+06	2.74538e+06	1.19264	1.02891	1.08091	1.07672	0.987403	1.07445	1.15242	1.28485	1.21863
C04210	307052	279722	274577	374296	471140	403685	401432	402354	386791	332650	391390	362020	293166	1.22837	1.54826	1.49284	1.3693	1.37245	1.31936	1.13468	1.33505	1.23486
C12987	223561	211937	213877	235848	278614	244125	277023	368148	262380	228388	277375	252882	217836	1.12999	1.49613	1.16104	1.27171	1.69002	1.20448	1.04844	1.27332	1.16088
C01594	186990	189036	163309	214458	270610	240670	228786	223423	228140	182969	229765	206367	182350	1.22279	1.47576	1.41279	1.25466	1.22525	1.25112	1.0034	1.26003	1.13171
C00530	458002	438092	374497	529451	543486	492384	508722	516013	521922	499066	507264	503165	428829	1.21753	1.21419	1.17141	1.1863	1.20331	1.21709	1.16379	1.1829	1.17335
C12109	100727	100456	99053.5	102005	103800	102744	102184	100947	99828.9	96362.1	96928.3	96645.2	99544	1.05009	1.01526	1.02099	1.02652	1.01409	1.00286	0.968036	0.973723	0.97088
C08975	242169	153390	146865	356847	145411	318153	369531	158313	379618	330578	349973	340276	212394	1.49641	0.679006	0.652738	1.73983	0.745374	1.78733	1.55644	1.64775	1.60209
C19508	200242	191020	197225	202504	218657	201483	205162	216460	206041	205772	210296	208034	195971	1.07257	1.11566	1.11285	1.0469	1.10455	1.05139	1.05001	1.0731	1.06155
C17450	956602	977770	952514	980850	1.05799e+06	1.03547e+06	1.02151e+06	1.0453e+06	948888	961165	960411	960788	961768	1.01505	1.08801	1.07402	1.06212	1.08686	0.986608	0.999373	0.998589	0.998981
C03414	802457	562241	571601	1.3848e+06	6.76083e+06	1.20856e+06	1.11107e+06	1.80267e+06	1.4869e+06	948293	1.448e+06	1.19815e+06	671460	1.79797	10.3925	9.44514	1.65471	2.6847	2.21443	1.41229	2.15649	1.78439
C02362	1.79475e+06	1.89042e+06	1.84325e+06	1.87865e+06	1.80076e+06	1.86032e+06	1.84e+06	1.78091e+06	1.81865e+06	1.87729e+06	1.83168e+06	1.85448e+06	1.83773e+06	1.00112	0.974953	1.01254	1.00124	0.969081	0.989617	1.02152	0.996708	1.00912
C05942	232191	182294	183783	273938	369040	275489	283139	318780	275830	238140	296977	267559	205595	1.33272	1.63516	1.59266	1.37717	1.55053	1.34162	1.1583	1.44448	1.30139
C07670	61187	36770.2	36215.8	84503.5	35640	83940	92074.3	37965.3	81920.2	81188.5	82790.1	81989.3	52674.6	1.52026	0.634803	0.688637	1.74798	0.72075	1.55521	1.54132	1.57173	1.55652
C02389	434824	450239	458053	962535	442940	1.07275e+06	462045	667897	1.749e+06	418457	463728	441093	451388	1.58567	1.47388	1.51346	1.02361	1.47965	3.87471	0.927046	1.02734	0.977193
C18581	710611	772441	722052	843615	800007	895981	921469	1.09005e+06	904264	871022	890137	880579	738497	1.23763	1.69024	1.57813	1.24776	1.47604	1.22446	1.17945	1.20534	1.19239
C02351	549478	530037	473259	640571	657551	595724	615491	624313	594528	603809	607433	605621	517292	1.22115	1.2178	1.1749	1.18983	1.20689	1.14931	1.16725	1.17426	1.17075
C16476	5.25303e+06	5.13344e+06	5.19058e+06	5.20389e+06	5.23177e+06	5.24712e+06	5.49181e+06	5.26932e+06	5.04347e+06	5.37343e+06	5.08366e+06	5.22855e+06	5.20911e+06	0.989511	0.966297	1.3125	1.05427	1.01156	0.968202	1.03154	0.975919	1.00373
C02704	430490	420928	421733	413657	6.82983e+06	442992	434688	702497	1.01358e+06	405512	544638	475075	419148	1.43739	2.71935	1.73758	1.03708	1.67601	2.41818	0.967466	1.29939	1.13343
C17156	1.28334e+06	154264	166522	692605	821847	762704	651917	1.48674e+06	1.36784e+06	296604	2.43934e+06	1.36797e+06	495843	11.4151	8.9399	8.75934	1.31476	2.99841	2.75862	0.598181	4.91958	2.75888
C19482	824163	804153	807828	850419	886371	853774	830044	847069	812892	838819	847772	843295	815175	1.02678	1.04472	1.11777	1.01824	1.03913	0.997199	1.029	1.03999	1.0345
C12389	940200	973881	897236	917885	1.0326e+06	966553	968823	942434	1.01879e+06	1.02713e+06	1.09844e+06	1.06279e+06	942492	0.998334	1.07362	1.03769	1.02794	0.999939	1.08095	1.0898	1.16547	1.12763
C17507	282693	286679	284372	294707	297972	308015	302254	270955	303554	280739	296167	288453	287386	1.10382	1.03045	0.995218	1.05173	0.942827	1.05626	0.976868	1.03055	1.00371
C09633	777424	760770	782010	805073	807099	798012	852023	848367	796665	803078	809298	806188	783161	1.034	1.12214	1.09113	1.08793	1.08326	1.01724	1.02543	1.03337	1.0294
C14436	225728	249231	257581	234601	231678	262842	222148	221667	235675	225740	237194	231467	237568	1.05206	1.09298	1.21492	0.935093	0.93307	0.992033	0.950213	0.998429	0.974321
C16417	536458	424903	430502	685007	847481	697072	738024	798724	726467	620009	763087	691548	479424	1.34708	1.77321	1.84465	1.5394	1.66601	1.51529	1.29324	1.59167	1.44246
C03725	1.59346e+06	1.63197e+06	1.58854e+06	1.84457e+06	1.75162e+06	1.79312e+06	1.895e+06	1.61081e+06	1.93352e+06	1.75236e+06	1.82037e+06	1.78637e+06	1.61005e+06	1.11679	1.06769	1.00008	1.17698	1.00047	1.20091	1.08839	1.13063	1.10951
C09654	3.07434e+06	3.08606e+06	3.16789e+06	3.07355e+06	3.23078e+06	3.20955e+06	3.14021e+06	3.11279e+06	3.24381e+06	3.12602e+06	3.03211e+06	3.07906e+06	3.12919e+06	1.00502	1.04237	1.01327	1.00352	0.99476	1.03663	0.998987	0.968975	0.983981
C05349	533303	531335	541609	559064	485218	537984	558720	500597	552453	748340	617297	682819	539423	1.04231	0.871653	0.904087	1.03577	0.928023	1.02416	1.3873	1.14437	1.26583
C03661	234872	234378	236749	232052	233522	226597	236335	240041	231282	232465	228899	230682	233747	0.987047	1.0594	1.07976	1.01107	1.02692	0.989453	0.994515	0.979259	0.986887
C01263	1.1737e+06	1.04107e+06	1.03742e+06	1.25974e+06	1.41639e+06	1.29764e+06	1.28329e+06	1.31771e+06	1.24219e+06	1.18186e+06	1.22602e+06	1.20394e+06	1.11493e+06	1.13067	1.28285	1.22745	1.15101	1.18188	1.11415	1.06003	1.09964	1.07983
C08659	474597	531977	518956	503702	535381	467849	495108	508188	506027	479590	479597	479593	498686	0.926884	1.03013	1.10144	0.992824	1.01905	1.01472	0.961706	0.96172	0.961713
C17770	256677	258484	255225	263093	260096	264952	270141	259028	265249	244601	248893	246747	254105	1.05037	1.01111	1.06948	1.06311	1.01938	1.04386	0.9626	0.979488	0.971044
C18613	248768	192504	181035	300056	376513	290429	230719	325722	238169	217962	243886	230924	264479	1.2563	1.41569	1.68075	0.872354	1.23156	0.90052	0.82412	0.922137	0.873128
C08536	178105	181370	181409	184737	187640	184705	187435	183086	182631	179886	175591	177738	179534	1.07323	1.03726	1.08698	1.04401	1.01979	1.01725	1.00196	0.978037	0.989999
C16546	727381	576125	583716	928798	1.1491e+06	945156	1.00068e+06	1.08299e+06	985013	840667	1.03467e+06	937667	656090	1.33468	1.75688	1.82766	1.52522	1.65067	1.50134	1.28133	1.57702	1.42917
C10556	211792	215453	185575	285567	294235	273981	237559	245178	285064	217283	236685	226984	204234	1.32891	1.30036	1.33826	1.16317	1.20047	1.39577	1.06389	1.15889	1.11139
C19409	510939	888928	645668	751654	2.22161e+06	1.5781e+06	981107	940766	2.26432e+06	1.67463e+06	567019	1.12082e+06	624548	1.10429	4.93843	10.166	1.57091	1.50631	3.62553	2.68134	0.907887	1.79461
C05381	803258	301129	308949	1.04088e+06	315440	3.0161e+06	3.09839e+06	323768	2.31457e+06	2.20332e+06	4.08547e+06	3.14439e+06	788164	3.77209	0.409197	0.421951	3.93115	0.410787	2.93666	2.79551	5.18353	3.98952
C08778	190881	177822	181269	191775	193900	199422	196686	179136	197532	182686	192726	187706	186029	1.13146	1.03589	1.00047	1.05729	0.962945	1.06183	0.982027	1.036	1.00901
C00631	159464	170248	163734	178610	174042	170946	166047	190718	171551	184053	168076	176065	162598	1.14356	1.23935	1.18843	1.02121	1.17294	1.05506	1.13195	1.03369	1.08282
C07580	2.67341e+06	2.69946e+06	2.57024e+06	2.68791e+06	2.79015e+06	2.62871e+06	2.70803e+06	2.69641e+06	2.69359e+06	2.75728e+06	2.59546e+06	2.67637e+06	2.65457e+06	0.98321	1.10792	1.02314	1.02014	1.01576	1.0147	1.03869	0.977732	1.00821
C19392	429102	403325	406942	438796	539338	437404	432499	1.05004e+06	433570	454513	447224	450869	420260	1.02681	1.29715	1.20923	1.02912	2.49855	1.03167	1.0815	1.06416	1.07283
HMDB0002091	912971	941704	948264	943275	912686	942868	930473	908923	923689	928904	937180	933042	926614	1.02562	1.00731	0.983168	1.00416	0.980908	0.996843	1.00247	1.0114	1.00694
C02628	831946	872645	877614	862775	824821	844962	868421	818125	855106	849952	870963	860457	849847	0.991723	0.967088	0.962249	1.02186	0.962673	1.00619	1.00012	1.02485	1.01248
C11328	559826	627511	618179	594157	631526	592376	608412	563062	596900	565715	565724	565719	589748	0.924515	1.0275	1.00168	1.03165	0.95475	1.01213	0.959249	0.959263	0.959256
C09978	329740	246618	253022	461198	258338	405794	555417	260846	487828	366263	566499	466381	292943	1.69409	0.901649	0.929752	1.89599	0.890433	1.66526	1.25029	1.93382	1.59205
C01864	1.15516e+06	1.24041e+06	1.1846e+06	1.27121e+06	1.13643e+06	1.27186e+06	1.31823e+06	1.1088e+06	1.34598e+06	1.23223e+06	1.35171e+06	1.29197e+06	1.20824e+06	1.01018	1.0402	0.942173	1.09103	0.917698	1.114	1.01985	1.11874	1.0693
C17816	708630	687008	680974	728351	714108	745150	746467	678145	757935	720462	730525	725494	693817	1.04252	1.00989	0.990975	1.07589	0.977413	1.09241	1.0384	1.05291	1.04566
C12101	639219	603175	612414	688962	589100	656093	726429	621763	654318	646810	717372	682091	628339	1.03565	0.923939	0.904523	1.15611	0.989534	1.04135	1.0294	1.1417	1.08555
C20515	233227	212468	208560	284303	342136	290280	304916	292954	288175	253588	297288	275438	222680	1.30671	1.54826	1.50802	1.3693	1.31558	1.29412	1.1388	1.33505	1.23692
C09929	265716	277780	262842	279920	268229	275246	263107	256960	267226	262879	269320	266099	264805	1.02534	0.98185	0.964583	0.993588	0.970375	1.00914	0.992726	1.01705	1.00489
C05594	67818	56276.5	59430	73138.8	80079.8	75803.1	76249.6	74110.3	75061.1	67323.7	68987	68155.4	62938.8	1.17499	1.36056	1.22699	1.21149	1.1775	1.19261	1.06967	1.0961	1.08288
C21557	334610	352268	330978	345834	328115	360951	337072	323483	332827	341884	343362	342623	337123	1.03137	0.984237	0.968623	0.999848	0.959542	0.987258	1.01412	1.01851	1.01631
C04521	419302	420814	422948	475161	448261	463217	450025	453787	460001	452691	447302	449997	418581	1.13498	1.03613	1.10108	1.07512	1.08411	1.09895	1.08149	1.06862	1.07505
C17309	428939	476511	446204	445228	567017	485716	480351	497691	453387	472247	444923	458585	446076	1.0159	1.32408	1.25743	1.07684	1.11571	1.01639	1.05867	0.997416	1.02804
C18547	238485	265484	248867	290765	270618	308814	271865	330811	283901	294285	306800	300543	251823	1.19001	1.48721	1.4033	1.07959	1.31367	1.12738	1.16862	1.21832	1.19347
C01194	293561	316833	303064	302432	299928	296785	295453	286932	299871	295558	302220	298889	304459	0.969748	0.961736	0.993591	0.970421	0.942433	0.984932	0.970765	0.992647	0.981706
C04084	1.5411e+06	1.5554e+06	1.4807e+06	1.71573e+06	1.5872e+06	1.61089e+06	1.56491e+06	1.46732e+06	1.79072e+06	1.61556e+06	1.84938e+06	1.73247e+06	1.52345e+06	0.999144	1.04348	1.01619	1.02721	0.963159	1.17544	1.06046	1.21395	1.1372
C20351	518110	528205	518461	529971	473168	535305	523115	501160	507983	516543	538053	527298	517563	1.04502	0.95312	0.939453	1.01073	0.968308	0.98149	0.99803	1.03959	1.01881
C00449	477781	481202	474702	487502	489351	488613	519285	486635	492168	480084	495780	487932	476880	1.02997	0.99697	1.08243	1.08892	1.02046	1.03206	1.00672	1.03963	1.02318
C07469	800258	2.31268e+06	4.69754e+06	1.15693e+06	3.53977e+06	1.04971e+06	920338	2.41471e+06	994215	1.46345e+06	672721	1.06809e+06	2.1984e+06	0.18177	0.706944	0.149978	0.41864	1.09839	0.452244	0.665688	0.306005	0.485847
C00829	273450	279022	256330	257590	258943	279046	272531	258701	272814	260866	266239	263553	269196	1.05197	0.921601	0.908408	1.01239	0.961011	1.01344	0.969055	0.989014	0.979035
C18704	351344	340275	276292	406465	409942	400891	319846	363017	346589	346278	369030	357654	334035	1.22391	1.28947	1.28828	0.957521	1.08676	1.03758	1.03665	1.10476	1.07071
C18099	438509	610543	657973	612942	326344	2.07786e+06	1.74279e+06	311584	444562	706685	629489	668087	1.0418e+06	1.32249	0.520922	0.719918	1.67286	0.299082	0.426723	0.678328	0.60423	0.641279
C16589	103344	93455.6	91332.2	106975	112557	109869	110982	114261	105589	104891	105828	105359	97878.4	1.1009	1.1182	1.20878	1.13388	1.16737	1.07878	1.07164	1.08122	1.07643
C06958	379728	102802	105447	437852	618693	481410	505917	525418	593809	444480	483903	464191	234588	1.93778	2.56669	2.2978	2.15662	2.23975	2.53129	1.89472	2.06278	1.97875
C19953	217444	181176	176112	252162	235869	240357	259191	215020	287775	232638	301243	266940	190942	1.25203	1.11161	1.23078	1.35743	1.1261	1.50713	1.21837	1.57767	1.39802
C00844	236463	244679	259641	248717	257140	247232	253961	259526	249674	256423	254722	255572	247148	1.00109	1.03187	1.14105	1.02757	1.05008	1.01022	1.03753	1.03064	1.03408
C01468	441913	453751	398648	523764	531596	523616	485841	483239	509354	484537	510373	497455	426558	1.16175	1.14044	1.12414	1.13898	1.13288	1.1941	1.13592	1.19649	1.16621
C01700	697459	554411	561717	767306	1.02362e+06	803186	939683	975178	889819	792449	908630	850539	630737	1.30432	1.54177	1.53151	1.48982	1.54609	1.41076	1.25639	1.44059	1.34849
C14922	830881	868614	860835	875296	838737	860680	828941	831721	835603	837196	846258	841727	852868	1.00745	0.981114	1.01894	0.971945	0.975205	0.979756	0.981624	0.992249	0.986937
C15309	354082	373971	361426	3.09621e+06	345750	2.85422e+06	3.02796e+06	316294	2.75685e+06	681078	2.45295e+06	1.56701e+06	364030	8.60542	1.01038	0.926948	8.3179	0.868869	7.57315	1.87094	6.73832	4.30463
C09930	277941	282943	265377	299815	311068	330473	349265	475986	329858	304519	353127	328823	277528	1.24826	1.64469	1.51361	1.25849	1.71509	1.18856	1.09726	1.2724	1.18483
C07178	750185	745716	756080	775274	795981	793050	791836	810107	798444	783427	773469	778448	759774	1.0571	1.02508	1.01774	1.0422	1.06625	1.0509	1.03113	1.01802	1.02458
C18409	515293	201269	206907	5.63135e+06	902558	915815	1.67014e+06	391495	1.8383e+06	416109	558464	487287	287160	2.78771	3.40539	2.60751	5.81606	1.36334	6.40166	1.44905	1.94479	1.69692
C16671	442001	375114	358689	505680	710073	558354	542355	546848	524905	489405	541087	515246	402039	1.26281	1.65386	1.47733	1.34901	1.36019	1.30561	1.21731	1.34586	1.28158
C10172	333104	319426	334172	345005	340074	349706	362996	337333	330449	381242	354954	368098	328395	0.95516	0.979108	1.076	1.10537	1.02722	1.00626	1.16093	1.08088	1.1209
C07308	87939.6	84746.3	91111.2	89581.2	94502.8	90734.3	89721.8	97140.8	93596.3	89529.1	93814.4	91671.7	89116.6	1.02254	1.12452	1.14612	1.00679	1.09004	1.05027	1.00463	1.05271	1.02867
C14201	5.12254e+06	5.4727e+06	4.96463e+06	4.23469e+06	4.32588e+06	3.15501e+06	5.42214e+06	1.98129e+06	4.7933e+06	4.01167e+06	3.23933e+06	3.6255e+06	5.27361e+06	0.933255	0.844377	0.801669	1.02817	0.3757	0.908922	0.760707	0.614253	0.68748
C09038	587481	626991	621313	679017	634728	703487	786134	602489	666049	562796	720124	641460	600257	1.13852	1.01463	1.08486	1.30966	1.00372	1.10961	0.937591	1.19969	1.06864
C10798	990860	412816	457284	1.21789e+06	1.13291e+06	1.15252e+06	1.28333e+06	1.42161e+06	1.3091e+06	1.01965e+06	1.16185e+06	1.09075e+06	705168	1.67412	1.04221	2.12732	1.8199	2.01599	1.85643	1.44596	1.64761	1.54679
C11504	107070	95417.5	109398	94583	96204.3	94490.6	94276.3	96011.8	87534.1	90968	94639.5	92803.8	103012	0.882098	0.898227	0.920881	0.915201	0.932049	0.849751	0.883086	0.918727	0.900907
C18780	220510	204607	221044	239009	223926	245653	231390	220546	242735	231572	225715	228644	218889	1.08929	0.955298	1.12296	1.05711	1.00757	1.10894	1.05794	1.03118	1.04456
C06391	482782	496231	493705	501368	538349	546884	521758	483588	510984	538298	498562	518430	485062	1.06689	1.14766	1.08785	1.07565	0.996961	1.05344	1.10975	1.02783	1.06879
C02845	479452	459765	480990	496582	505936	503349	522478	485539	473606	540109	510902	525506	472674	0.95516	0.979108	1.076	1.10537	1.02722	1.00197	1.14267	1.08088	1.11177
C19283	339789	319944	281090	303763	339851	365347	337683	316658	353981	341651	339328	340490	316720	1.06736	1.06195	1.06474	1.06619	0.999806	1.11765	1.07872	1.07138	1.07505
C07153	695255	706381	717105	696687	717755	710706	713135	696760	689179	685317	707002	696160	704341	0.973976	0.998396	0.975528	1.01248	0.989235	0.978473	0.97299	1.00378	0.988384
C08998	1.24687e+06	1.43132e+06	1.38968e+06	1.58816e+06	1.32966e+06	1.99727e+06	1.38949e+06	1.34252e+06	1.42929e+06	1.22939e+06	1.31062e+06	1.27e+06	1.35699e+06	2.14107	0.981095	0.942806	1.02395	0.98933	1.05328	0.905964	0.965826	0.935895
C07165	723032	743753	729319	819355	1.03474e+06	778515	880015	782498	798610	780608	776503	778555	738717	1.10897	1.76639	1.11426	1.19128	1.05927	1.08108	1.05671	1.05115	1.05393
C08567	216707	440480	1.87539e+06	194714	258167	310887	206618	258691	203973	215790	203765	209777	719739	0.283358	0.334972	0.307538	0.287074	0.359423	0.283399	0.299816	0.28311	0.291463
C00294	468578	404154	372144	456674	420845	517099	404424	411357	394280	539233	654954	597094	432932	0.954333	0.93255	0.940275	0.934153	0.950166	0.910722	1.24554	1.51284	1.37919
C04236	1.04584e+06	840014	2.41698e+06	629883	989875	1.95676e+06	563852	691637	532257	366205	769197	567701	1.31905e+06	0.818757	0.403714	4.03827	0.42747	0.524346	0.403517	0.277628	0.583146	0.430387
C01512	703900	732109	689581	694076	600906	724342	710765	654676	700298	663058	653493	658275	696316	0.960636	0.871221	0.890339	1.02075	0.940199	1.00572	0.952236	0.938501	0.945368
C09241	488378	487398	504642	419113	488146	446656	397797	432711	400751	406825	400075	403450	484746	0.94657	0.954589	1.01591	0.820628	0.892654	0.826724	0.839254	0.825329	0.832292
C17370	796604	793664	809010	835084	724779	803596	834569	747749	843325	808782	859347	834064	805745	1.04231	0.871653	0.904087	1.03577	0.928023	1.04664	1.00377	1.06653	1.03515
C07309	412860	380358	308838	454346	458232	448116	366289	419700	387416	392211	412501	402356	378502	1.20736	1.27203	1.27086	0.967732	1.10884	1.02355	1.03622	1.08982	1.06302
C05252	263625	294248	263067	304399	287726	313605	280129	315295	275865	296726	304251	300489	270101	1.16387	1.23341	1.18274	1.03713	1.16732	1.02134	1.09857	1.12643	1.1125
C15943	1.31113e+06	1.37886e+06	1.33681e+06	1.379e+06	1.24157e+06	1.38398e+06	1.34734e+06	1.30304e+06	1.33843e+06	1.35209e+06	1.32291e+06	1.3375e+06	1.3375e+06	1.02134	0.88938	0.876648	1.00736	0.974239	1.0007	1.01091	0.989097	1
HMDB0028699	116572	113874	115239	121376	124860	119009	122009	121296	121276	118380	117310	117845	116233	1.03416	1.05698	1.0218	1.0497	1.04356	1.04339	1.01847	1.00927	1.01387
C02862	161940	145007	144813	197404	230091	201554	211716	203411	200093	175440	206420	190930	153987	1.2334	1.55459	1.46982	1.3749	1.32096	1.29941	1.13932	1.34051	1.23991
C01552	1.21346e+06	1.42635e+06	1.34021e+06	1.35321e+06	1.44853e+06	1.30115e+06	1.39473e+06	1.40412e+06	1.30155e+06	1.24837e+06	1.23009e+06	1.23923e+06	1.31378e+06	0.949254	1.12617	1.0734	1.06162	1.06877	0.990694	0.950215	0.936302	0.943258
C09130	423358	375488	316691	465899	471188	458317	379971	430526	397268	402184	422990	412587	384491	1.21878	1.28406	1.28288	0.988244	1.11973	1.03323	1.04602	1.10013	1.07307
C10810	1.09526e+06	1.10542e+06	1.05233e+06	1.21936e+06	1.09693e+06	1.14486e+06	1.11217e+06	1.04282e+06	1.39653e+06	1.05167e+06	1.31435e+06	1.18301e+06	1.07416e+06	1.00709	1.05178	1.01542	1.03538	0.970821	1.30011	0.979064	1.2236	1.10133
C20340	340440	302214	289416	406577	502685	410525	433647	436907	381118	333246	439844	386545	315941	1.28297	1.52939	1.4837	1.37256	1.38287	1.20629	1.05477	1.39217	1.22347
C18853	183020	190362	193121	189334	196044	193929	189857	174379	185896	192906	182193	187550	186501	1.01686	0.968186	1.0415	1.01799	0.935003	0.996751	1.03434	0.9769	1.00562
C11998	47621.6	44774	46028	64106.1	200781	70580.9	71554.4	70348.9	65312.3	58729.7	72392.1	65560.9	47110.7	1.37379	4.61764	2.73717	1.51886	1.49327	1.38636	1.24663	1.53664	1.39164
C10784	473399	467344	481667	466714	469366	492263	476108	474023	493265	474013	476048	475030	475028	1.04714	0.993432	1.03233	1.00227	0.997883	1.03839	0.997863	1.00215	1
C17399	547818	545719	543813	553924	529443	545278	535162	528887	545471	543637	529656	536646	545384	0.991736	0.99574	0.987629	0.981257	0.969751	1.00016	0.996796	0.971162	0.983979
C01683	418395	448435	431192	461372	440559	468518	504393	422263	505740	463995	455123	459559	432482	1.13345	0.993647	0.916971	1.16627	0.976369	1.16939	1.07286	1.05235	1.06261
C04596	384322	299537	383688	290217	311297	285850	290385	282346	282771	285882	271055	278469	359998	0.800583	0.811391	0.802513	0.806629	0.784298	0.785479	0.794121	0.752935	0.773528
C20239	1.21206e+06	1.40669e+06	1.32173e+06	1.33455e+06	1.50694e+06	1.21656e+06	1.28944e+06	1.35907e+06	1.28361e+06	1.2523e+06	1.19342e+06	1.22286e+06	1.2995e+06	0.982569	1.1315	1.08098	0.992257	1.04585	0.987771	0.96368	0.91837	0.941025
C18898	1.05368e+06	918795	874271	1.20318e+06	1.49972e+06	1.27149e+06	1.2644e+06	1.2673e+06	1.27726e+06	1.05155e+06	1.23277e+06	1.14216e+06	957996	1.2766	1.53141	1.48477	1.31983	1.32286	1.33326	1.09766	1.28682	1.19224
C16939	194254	173624	162384	235211	330282	259712	256416	270938	255872	210640	251680	231160	182841	1.29597	1.74287	1.62965	1.4024	1.48182	1.39942	1.15203	1.3765	1.26426
C09100	280199	290865	292161	294128	284590	294001	289418	275868	287417	282461	288946	285703	285318	0.994097	0.947813	0.99123	1.01437	0.966876	1.00736	0.989985	1.01271	1.00135
C07890	151375	118874	133856	168870	218797	193743	163531	194666	192260	153370	187851	170611	138536	1.34298	1.49458	1.46125	1.18042	1.40516	1.3878	1.10708	1.35598	1.23153
C18560	641719	665847	648313	637493	599796	646365	643382	653772	670807	644036	629867	636952	646087	1.0248	0.996762	1.00514	0.995812	1.0119	1.03826	0.996825	0.974895	0.98586
C04908	1.4441e+06	333216	337232	2.58679e+06	342676	2.46644e+06	2.89871e+06	357595	2.82619e+06	1.7005e+06	2.99007e+06	2.34528e+06	899014	2.96988	0.398264	0.378523	3.22432	0.397763	3.14365	1.89152	3.32594	2.60873
C16407	606948	608535	634144	624204	574408	593324	620420	574922	599261	610724	613984	612354	609879	1.00147	0.940092	0.94515	1.01728	0.942682	0.982591	1.00139	1.00673	1.00406
C01596	372798	327008	294996	382238	387963	388874	393246	400214	389938	370401	400929	385665	340047	1.15005	1.18714	1.2278	1.15644	1.17694	1.14672	1.08926	1.17904	1.13415
C16924	1.68509e+06	2.64355e+06	1.15998e+06	1.22449e+06	2.10983e+06	2.15175e+06	1.10768e+06	1.67562e+06	1.6326e+06	1.55006e+06	3.26226e+06	2.40616e+06	1.61831e+06	1.27257	1.09369	1.17763	0.684468	1.03541	1.00883	0.957822	2.01584	1.48683
C17489	780849	333507	317936	1.2967e+06	1.45993e+06	891811	1.58556e+06	1.07249e+06	1.48375e+06	809200	987868	898534	554849	2.39839	8.40985	2.90315	2.85764	1.93294	2.67415	1.45841	1.78042	1.61942
C16985	1.34897e+06	1.37838e+06	1.31054e+06	1.32354e+06	1.34155e+06	1.40339e+06	1.62153e+06	1.26889e+06	1.81149e+06	1.33191e+06	1.42039e+06	1.37615e+06	1.3419e+06	1.24861	1.02039	1.05476	1.20839	0.945593	1.34995	0.992557	1.0585	1.02553
HMDB0031511	392034	375566	386454	472082	393683	366427	381675	386705	402013	388315	400932	394624	378779	1.05501	0.97452	1.07035	1.00764	1.02093	1.06134	1.02518	1.05849	1.04183
C00703	378573	395091	377125	379084	387635	398865	415907	390492	377031	380862	373626	377244	382192	1.00692	1.00712	1.05153	1.08821	1.02172	0.986496	0.996518	0.977588	0.987053
C02199	220220	238707	223766	261438	243323	277667	272930	325499	280233	269932	275855	272893	227871	1.20766	1.69759	1.585	1.19774	1.42844	1.22979	1.18458	1.21058	1.19758
C06082	289116	213884	205435	347650	1.34363e+06	387069	378298	248421	378157	317828	400858	359343	243516	1.3771	8.79181	2.3109	1.55348	1.02014	1.5529	1.30516	1.64612	1.47564
C09956	364844	359347	371896	387923	378840	383955	371465	369612	367496	377324	366994	372159	365103	1.06256	1.05303	1.1039	1.01742	1.01235	1.00655	1.03347	1.00518	1.01932
C07498	532232	497399	495497	501086	550336	552536	556666	497699	532008	529905	509961	519933	509133	1.00232	1.07923	1.10275	1.09336	0.977541	1.04493	1.0408	1.00163	1.02121
C12406	246728	240455	262359	405141	236226	449096	1.1826e+06	210199	1.06272e+06	252212	625953	439083	249330	3.65829	0.913467	0.940602	4.74312	0.843054	4.26231	1.01156	2.51054	1.76105
C19026	429167	523229	500314	454542	502676	490983	463767	467607	453193	434835	460222	447528	478415	1.07519	1.04612	1.20202	0.969384	0.977409	0.947281	0.908907	0.961973	0.93544
C10138	679581	651676	681761	703861	717119	713453	744361	688209	680490	847343	724159	785751	669974	1.00062	1.02817	1.08996	1.11103	1.02722	1.0157	1.26474	1.08088	1.17281
C01397	174270	147898	134706	179963	263983	216186	213837	215609	199532	181710	209287	195499	156181	1.26222	1.64856	1.4994	1.36917	1.38051	1.27758	1.16346	1.34004	1.25175
C08798	378149	332732	348738	459461	396054	439446	484988	396650	522580	432674	547303	489988	358595	1.27027	1.07538	1.16977	1.35247	1.10612	1.4573	1.20658	1.52624	1.36641
C04500	438880	333574	343804	736532	388299	602997	954013	401469	965338	983944	1.02002e+06	1.00198e+06	459164	1.52803	0.847894	0.823447	2.07772	0.874346	2.10238	2.1429	2.22146	2.18218
C07965	1.24021e+06	1.16463e+06	1.19923e+06	1.68153e+06	1.16131e+06	1.09387e+06	1.13519e+06	1.03974e+06	1.9959e+06	2.87711e+06	1.51256e+06	2.19483e+06	1.76204e+06	1.44012	0.659904	0.619085	0.644246	0.590079	1.13272	1.63283	0.858416	1.24562
C13901	601493	674215	664188	638379	678529	636465	653695	644066	641326	607820	682037	644929	633642	0.964622	1.0275	1.09863	1.03165	1.01645	1.01213	0.959249	1.07638	1.01781
C19247	101486	85428.4	89467.7	100698	151533	128164	135333	132190	135562	120526	127917	124221	93775.1	1.38673	1.75	1.60125	1.44316	1.40965	1.4456	1.28527	1.36408	1.32467
C19535	1.99978e+06	1.62844e+06	1.74385e+06	2.23918e+06	2.16025e+06	2.16238e+06	2.02555e+06	2.01311e+06	2.06822e+06	1.99113e+06	2.02466e+06	2.00789e+06	1.72149e+06	1.30487	1.22341	1.20064	1.17662	1.1694	1.20141	1.15663	1.17611	1.16637
C00080	1.11429e+06	565807	558371	1.31993e+06	617935	1.29822e+06	1.41681e+06	654089	1.41099e+06	1.2493e+06	1.40588e+06	1.32759e+06	854004	1.49854	0.755589	0.720576	1.65902	0.765908	1.6522	1.46287	1.64622	1.55454
C11378	1.02026e+06	978070	965296	1.01072e+06	1.01348e+06	1.01738e+06	1.06664e+06	996571	975367	953686	946763	950225	991381	0.992322	0.974825	0.926773	1.07591	1.00524	0.983846	0.961977	0.954994	0.958486
C10576	422920	432978	390179	528120	492610	497931	507443	446965	498424	460761	503851	482306	416727	1.24974	1.22908	1.2024	1.21769	1.07256	1.19604	1.10567	1.20907	1.15737
C10434	286827	291989	273861	309401	321014	341039	360431	491204	340404	314255	364417	339336	286401	1.24826	1.64469	1.51361	1.25849	1.71509	1.18856	1.09726	1.2724	1.18483
C20021	207293	220822	202980	212285	198670	218824	203856	200593	217754	214199	215745	214972	209591	1.02957	0.967656	0.987812	0.972638	0.957066	1.03894	1.02199	1.02936	1.02567
C09347	207227	231298	216210	239278	235107	246514	227969	254347	221621	236482	239161	237822	214673	1.1511	1.29646	1.26791	1.06194	1.18481	1.03237	1.10159	1.11407	1.10783
C12032	1.07126e+06	410075	418069	1.80425e+06	456237	1.72103e+06	1.93675e+06	456994	2.17178e+06	1.52226e+06	2.38825e+06	1.95526e+06	734558	2.01716	0.609508	0.615662	2.63661	0.622134	2.95659	2.07235	3.25127	2.66181
C08272	786750	727865	756016	782474	757406	803684	745574	805448	743231	760941	809809	785375	762522	1.05038	1.07044	1.11135	0.977773	1.05629	0.9747	0.997926	1.06201	1.02997
C11830	488202	208789	217992	671771	243190	595030	643393	236226	736097	550519	888570	719545	331868	1.58367	0.720887	0.741985	1.9387	0.711807	2.21804	1.65885	2.67748	2.16817
C04181	328592	295160	340848	314414	327519	343210	286185	310857	292572	312014	292893	302453	318179	1.07465	0.874366	1.01318	0.899445	0.976987	0.91952	0.980623	0.920529	0.950576
C08691	328384	326489	307861	367714	318012	367391	344047	289160	358634	332779	337671	335225	316165	1.03172	1.01241	1.07913	1.08819	0.914586	1.13432	1.05255	1.06802	1.06028
C01059	199990	174273	163658	235205	293680	237861	240932	237885	244621	208570	239414	223992	180454	1.25787	1.56672	1.3288	1.33515	1.31826	1.35559	1.15581	1.32673	1.24127
C15117	509169	403289	408603	650162	804371	661613	700482	758095	689513	588470	691830	640150	455036	1.34178	1.77321	1.76739	1.5394	1.66601	1.51529	1.29324	1.52038	1.40681
C01017	704545	809064	693913	910650	857823	881684	777623	795098	763263	774542	806361	790452	750655	1.26232	1.15215	1.25589	1.03593	1.05921	1.0168	1.03182	1.07421	1.05302
C15381	95645.1	94928.4	95026.6	96757.7	99571.1	94078.6	106428	90543.2	101071	97021.2	92303.5	94662.3	95255	1.10724	1.03887	1.00335	1.1173	0.950535	1.06105	1.01854	0.969015	0.993778
C11891	611325	656660	647499	715974	653389	666435	681184	595143	697068	655846	674576	665211	625460	1.19441	1.00883	0.996462	1.08909	0.951528	1.11449	1.04858	1.07853	1.06356
C13910	434602	449060	400957	542707	557093	511685	521459	459311	512191	511562	517768	514665	429268	1.24674	1.22613	1.19951	1.21476	1.06999	1.19317	1.19171	1.20617	1.19894
C16538	525815	513913	505222	552278	568217	513584	524472	573278	545427	545122	536607	540865	514880	1.08138	1.08189	1.07821	1.01863	1.11342	1.05933	1.05874	1.0422	1.05047
C03958	617144	179769	244393	762537	891565	953302	578080	751431	594303	680851	879911	780381	471990	6.75302	2.83401	1.73908	1.22477	1.59205	1.25914	1.44251	1.86426	1.65338
C07592	597848	563753	527441	623988	569825	564594	593950	538865	608580	567887	614240	591063	560186	0.988123	1.05243	1.03352	1.06027	0.961938	1.08639	1.01375	1.09649	1.05512
C12958	1.59627e+06	1.7458e+06	1.69978e+06	1719087	1.60835e+06	1.71803e+06	1.49284e+06	1.38839e+06	1.6922e+06	1.4837e+06	1.57093e+06	1.52732e+06	1.62074e+06	1.02848	1.05107	1.06564	0.921081	0.85664	1.04409	0.915447	0.969264	0.942356
C13179	219815	208385	210293	231896	321153	240035	272381	344347	257983	224561	272727	248644	214186	1.12999	1.49613	1.16104	1.27171	1.6077	1.20448	1.04844	1.27332	1.16088
C19910	240560	236846	234378	270205	366333	272492	298088	356076	282331	247389	298467	272928	237658	1.27813	1.47562	1.18461	1.25427	1.49827	1.18797	1.04094	1.25587	1.1484
C01081	2.32138e+06	1.14732e+06	1.14929e+06	2.71889e+06	1.08021e+06	2.86206e+06	2.80977e+06	1.02712e+06	2.82055e+06	2.73908e+06	2.63169e+06	2.68538e+06	1.80315e+06	1.56845	0.597707	0.573557	1.55826	0.569626	1.56424	1.51905	1.4595	1.48928
C19075	419125	497612	475808	483485	436696	496095	443172	417826	437567	429711	458402	444056	452654	1.10955	1.08126	1.20189	0.979053	0.92306	0.96667	0.949315	1.0127	0.981007
C05183	388980	323677	326912	494002	456580	487614	510723	390613	514192	451896	518226	485061	357455	1.25036	1.23665	1.20889	1.42878	1.09276	1.43848	1.26421	1.44977	1.35699
C08692	471719	284690	294794	846649	331540	816329	997279	335945	1.0597e+06	970812	1.14839e+06	1.0596e+06	401639	1.81094	0.799216	0.85114	2.48303	0.836435	2.63845	2.41713	2.85927	2.6382
C11520	174043	147381	162514	193905	258864	211029	207176	218290	204524	160805	206521	183663	163545	1.25039	1.43712	1.4463	1.26679	1.33474	1.25057	0.983247	1.26278	1.12301
C15572	515264	559675	514393	525481	570974	570676	533580	560242	531494	525439	556258	540849	524165	1.05847	1.06002	1.02638	1.01796	1.06883	1.01398	1.00243	1.06123	1.03183
C10646	574370	470389	487995	621114	776921	635299	642049	673832	639108	578476	682490	630483	520177	1.18911	1.36828	1.37191	1.23429	1.29539	1.22863	1.11207	1.31203	1.21205
C17403	496059	478374	473390	555102	739909	575989	555268	528177	546848	554793	535275	545034	486213	1.26184	1.45681	1.21335	1.14203	1.08631	1.12471	1.14105	1.10091	1.12098
C16250	347544	341364	357709	359738	365553	366898	368054	363922	360804	362119	356676	359398	347970	1.09047	1.01823	1.02808	1.05772	1.04584	1.03688	1.04066	1.02502	1.03284
C16517	528209	632728	609109	623045	525917	609147	541045	503192	566395	513841	552058	532949	564210	1.07204	1.0447	1.16125	0.958943	0.891852	1.00387	0.910725	0.978461	0.944593
C07466	174773	159432	163897	236343	714945	251326	254792	271433	244619	209126	283428	246277	169053	1.41399	4.58212	3.49837	1.50718	1.60561	1.447	1.23704	1.67656	1.4568
C14702	2.31904e+06	762417	612004	1.06894e+06	3.71131e+06	750271	734984	1.36166e+06	2.51047e+06	971850	1.17629e+06	1.07407e+06	1.10835e+06	1.59419	1.00202	0.906514	0.663135	1.22855	2.26505	0.876845	1.0613	0.969073
C04529	857475	683091	1.38833e+06	332483	334956	490835	286205	1.43519e+06	2.41275e+06	307112	302628	304870	875974	0.366615	4.45254	1.00542	0.326728	1.6384	2.75436	0.350594	0.345476	0.348035
C11878	160624	128268	121591	184162	259669	193843	202679	215303	186218	164773	208963	186868	142044	1.3573	1.67714	1.62203	1.42688	1.51575	1.31099	1.16002	1.47112	1.31557
C00384	229394	203456	171428	226924	268931	248337	205885	233278	211738	217922	222224	220073	208292	3.74746	1.28432	6.9312	0.988445	1.11996	1.01654	1.04623	1.06688	1.05656
C12012	657393	647311	629826	664092	604370	692850	747083	639440	672922	665200	737768	701484	652951	1.06105	0.914392	0.895176	1.14416	0.979309	1.03059	1.01876	1.1299	1.07433
C12288	589835	227779	230806	555812	555684	604865	639272	639183	488750	639134	550308	594721	431685	1.61659	1.68616	1.80607	1.48088	1.48067	1.13219	1.48056	1.27479	1.37767
C08756	334343	329418	325555	363444	385157	351322	365535	379950	356668	355061	356409	355735	333431	1.05452	1.11246	1.13983	1.09628	1.13951	1.06969	1.06487	1.06891	1.06689
C02590	1.87978e+06	1.92137e+06	1.87174e+06	1.94018e+06	2.17756e+06	1.99514e+06	2.00733e+06	2.05408e+06	2.04428e+06	1.93494e+06	1.88726e+06	1.9111e+06	1.88993e+06	1.06083	1.08911	1.07402	1.06212	1.08686	1.08167	1.02382	0.998589	1.0112
C04114	472311	504551	495671	515163	513388	508906	518243	521450	524680	474833	504991	489912	492121	1.05892	1.14934	1.05435	1.05308	1.0596	1.06616	0.964871	1.02615	0.995511
C14561	337564	281260	273399	397109	387252	382586	412470	333801	446747	374252	467655	420954	301828	1.22961	1.0917	1.20874	1.36657	1.10593	1.48014	1.23995	1.54941	1.39468
C08475	896029	892721	909983	973537	851596	914578	1.02237e+06	841076	961441	909726	995552	952639	906310	1.04231	0.952178	0.918489	1.12806	0.928023	1.06083	1.00377	1.09847	1.05112
C08992	370657	414657	425490	383999	379214	417331	367570	362828	358143	369495	388243	378869	392296	1.11245	1.0834	1.20426	0.936972	0.924886	0.912943	0.941879	0.989671	0.965775
C09229	231822	305306	636175	480162	290341	278630	267427	254992	261876	633014	282911	457963	399203	2.76003	0.657805	0.668385	0.669903	0.638754	0.655998	1.5857	0.70869	1.14719
C17050	457271	362183	366956	515323	674959	554552	629084	653963	581297	528489	596333	562411	412454	1.32566	1.65872	1.62372	1.52522	1.58554	1.40936	1.28133	1.44582	1.36357
C12114	1.53712e+06	708717	723769	504722	508356	729462	2.39233e+06	1.30024e+06	742789	716565	692147	704356	958913	0.536262	0.715334	0.493742	2.49484	1.35596	0.774615	0.747268	0.721804	0.734536
C08311	133870	142162	154627	132881	149833	133307	160335	157557	142944	186158	153829	169993	143115	0.957285	1.01595	0.944954	1.12032	1.10091	0.998803	1.30075	1.07486	1.18781
C07844	434839	436307	426539	461850	2.70307e+06	479766	505101	463420	501767	457412	534822	496117	442714	1.06526	8.86006	2.72863	1.14092	1.04677	1.13339	1.0332	1.20805	1.12063
C20125	106088	109144	109167	114069	110723	110526	110927	111785	109903	108250	105121	106686	107154	1.07656	1.03529	1.04942	1.03521	1.04322	1.02565	1.01023	0.981028	0.995631
C05595	347468	288351	257296	348354	429158	364254	312901	373956	321796	321967	337731	329849	312742	1.17575	1.45075	1.35284	1.00051	1.19573	1.02895	1.0295	1.0799	1.0547
C10139	605321	596524	582098	613123	582766	620301	647076	620520	673451	653844	659794	656819	591466	1.02384	0.963505	1.03653	1.09402	1.04912	1.13861	1.10546	1.11552	1.11049
C10948	721855	656055	561340	727350	880359	739977	748296	761557	791776	704825	778480	741653	658633	1.35384	1.16629	1.38468	1.13613	1.15627	1.20215	1.07013	1.18196	1.12605
C01137	441498	347619	347503	563752	697466	573681	607384	657340	597873	510259	628011	569135	392343	1.35469	1.78322	1.85507	1.5481	1.67542	1.52385	1.30054	1.60067	1.45061
C00440	396254	401969	386071	418032	603429	446092	491014	652529	468620	404810	500141	452476	394432	1.26855	1.46455	1.17572	1.24486	1.65435	1.18809	1.02631	1.268	1.14716
C00075	1.26718e+06	422138	452278	518318	406736	518635	530895	427157	573957	627795	535667	581731	652047	0.77852	0.669857	0.669693	0.814197	0.655102	0.880238	0.962806	0.821516	0.892161
C19052	395751	351003	295748	435518	463960	428431	355194	402452	370277	375959	395408	385683	362181	1.15272	1.27427	1.27309	0.980707	1.11119	1.02235	1.03804	1.09174	1.06489
C18466	395698	427018	409668	408047	424323	428949	424551	398145	414311	416707	401011	408859	408079	1.06608	0.883245	1.02347	1.04036	0.975657	1.01527	1.02114	0.982681	1.00191
C02027	852632	871220	828691	928426	847940	896670	1.02053e+06	806287	1.14497e+06	841848	925004	883426	844548	1.25395	1.02475	1.05927	1.20837	0.954696	1.35572	0.996802	1.09526	1.04603
C07519	268460	301371	305382	309300	318036	323350	311311	340406	306467	311282	322203	316743	288143	1.11019	1.2237	1.17343	1.08041	1.18138	1.0636	1.08031	1.11821	1.09926
C17950	116987	110904	111919	123416	170919	127748	144963	131635	131667	119513	125049	122281	113991	1.12999	1.49613	1.16104	1.27171	1.15479	1.15507	1.04844	1.09701	1.07273
C07505	398037	409697	385407	411504	444133	451517	430773	396518	436335	397807	400237	399022	394786	1.00237	1.12372	1.08026	1.09116	1.00439	1.10525	1.00765	1.01381	1.01073
C14251	79304.2	74845.8	65059.2	77280	89079.1	83357.8	87388.6	90104.8	85506.2	73307.2	87668.5	80487.9	73434.6	1.08712	1.2381	1.19383	1.19002	1.22701	1.16439	0.998265	1.19383	1.09605
C12310	290489	252422	253160	342599	294767	344602	415214	305250	429256	348111	416196	382154	269044	1.32656	1.14165	1.11697	1.54329	1.13457	1.59549	1.29388	1.54694	1.42041
C07192	736131	1.63071e+06	865240	802411	1.09001e+06	782351	659512	816018	622157	639519	704167	671843	961218	0.968663	1.01901	1.15195	0.686121	0.848942	0.647259	0.665322	0.732578	0.69895
C15112	728748	283240	280162	1.21947e+06	299640	1.1802e+06	1.33532e+06	315647	1.50006e+06	1.04096e+06	1.63853e+06	1.33975e+06	497241	2.05821	0.62583	0.628193	2.68546	0.634797	3.01676	2.09348	3.29524	2.69436
C19524	761609	883231	1.36908e+06	832377	3.59298e+06	884004	755265	733244	792634	759220	797744	778482	1.00046e+06	0.967589	0.807755	1.12856	0.754922	0.732911	0.792273	0.758875	0.797381	0.778128
C05648	98150	96634.5	95627.6	100837	149466	106269	112168	106695	110467	93147.2	100442	96794.6	96965.8	1.27813	1.47562	1.18461	1.15677	1.10034	1.13923	0.960619	1.03585	0.998234
C05158	1.53572e+06	1.48997e+06	1.4218e+06	1.70974e+06	1.45016e+06	1.58213e+06	1.75281e+06	1.4622e+06	1.95815e+06	1.47461e+06	1.69187e+06	1.58324e+06	1.47121e+06	1.23106	1.07676	1.03994	1.1914	0.993873	1.33098	1.00231	1.14998	1.07615
C05539	298002	301199	301041	331970	310864	338463	322107	333459	329248	325577	317393	321485	298650	1.13859	1.07813	1.11026	1.07854	1.11656	1.10245	1.09016	1.06276	1.07646
C05790	2.75852e+06	833787	867882	3.13458e+06	3.06088e+06	3.09098e+06	3.17126e+06	3.04026e+06	3.17432e+06	3.01494e+06	3.14672e+06	3.08083e+06	1.79272e+06	1.70581	1.64722	1.53898	1.76896	1.69589	1.77067	1.68177	1.75528	1.71852
C08994	554144	648089	632341	629689	568751	646112	577185	544175	578563	559654	597021	578337	594766	1.09979	1.07175	1.19131	0.97044	0.91494	0.972757	0.940964	1.00379	0.972377
C00397	567684	563323	598135	560899	672322	664449	631126	584625	1.61273e+06	607967	642900	625433	569841	1.13901	1.08702	1.08518	1.10755	1.02594	2.83015	1.06691	1.12821	1.09756
C01857	527062	415098	349383	316733	492617	281391	363315	449995	380170	281969	285325	283647	401225	1.02244	1.17823	0.775974	0.905514	1.12155	0.947523	0.70277	0.711134	0.706952
C05504	1.11074e+06	440747	457749	1.23769e+06	491215	1.27931e+06	1.18822e+06	444814	1.25717e+06	1.22434e+06	1.23913e+06	1.23174e+06	807240	1.56601	0.572426	0.523828	1.47195	0.551031	1.55736	1.5167	1.53503	1.52586
C15746	248467	297878	284826	289422	261413	296970	265289	250117	261934	257231	274406	265819	269545	1.1154	1.08696	1.20822	0.984213	0.927924	0.971765	0.954318	1.01804	0.986177
C01035	466442	502521	464443	515549	469185	537874	579976	473985	522403	506232	533689	519961	489797	1.0981	0.946319	0.926433	1.18412	0.967718	1.06657	1.03356	1.08961	1.06158
C18793	924921	970877	907543	1.06033e+06	1.35133e+06	1.12615e+06	1.15819e+06	1.57841e+06	1.13656e+06	1.09478e+06	1.171e+06	1.13289e+06	936153	1.22713	1.6759	1.56475	1.23718	1.68606	1.21408	1.16945	1.25086	1.21016
C07482	284742	249189	256831	412908	285434	379803	413021	299908	423402	630939	437715	534327	289978	1.21401	1.04479	0.981889	1.42432	1.03424	1.46012	2.17582	1.50948	1.84265
C07172	406090	393296	319343	469800	473818	463357	369683	419582	400594	400234	426532	413383	386084	1.22391	1.28947	1.28828	0.957521	1.08676	1.03758	1.03665	1.10476	1.07071
C20545	280018	274901	278225	297698	268130	302309	325457	281510	299201	299391	296608	297999	278593	1.13534	0.995302	0.918498	1.16822	1.01047	1.07397	1.07465	1.06466	1.06966
C04597	204783	208537	208582	212408	215746	212372	215511	210511	209987	206831	201892	204361	206426	1.07323	1.03726	1.08698	1.04401	1.01979	1.01725	1.00196	0.978037	0.989999
C14211	1.17703e+06	759861	752980	1.55941e+06	769237	877278	952729	730167	917003	988062	1.24025e+06	1.11416e+06	943287	1.21394	0.782478	0.836646	1.01001	0.774066	0.972136	1.04747	1.31482	1.18114
C06691	471614	470624	483703	465953	468905	463624	474554	481994	477591	466783	483907	475345	471437	0.982692	1.05473	1.075	1.00661	1.02239	1.01305	0.990127	1.02645	1.00829
C11351	209160	221106	208703	203000	215914	210820	215257	206766	212370	211489	225131	218310	212819	1.00544	1.02785	1.02188	1.01145	0.971556	0.99789	0.993749	1.05785	1.0258
HMDB0034315	253517	249603	247002	284759	386065	287169	314143	375255	297538	260713	314543	287628	250459	1.27813	1.47562	1.18461	1.25427	1.49827	1.18797	1.04094	1.25587	1.1484
C07287	725420	692175	706656	745793	740786	773744	774777	781523	763580	789033	782847	785940	702500	1.09858	1.08531	1.09076	1.10289	1.11249	1.08695	1.12318	1.11437	1.11878
C19545	818859	648768	587642	1.03278e+06	1.40295e+06	1.00696e+06	848854	1.1154e+06	860873	823122	974405	898763	710996	1.68553	1.77315	2.00447	1.19389	1.56879	1.2108	1.1577	1.37048	1.26409
C10565	196475	190429	198106	199288	201846	194990	193177	196496	192309	199903	194303	197103	195568	1.03659	1.00508	1.01834	0.987775	1.00475	0.983338	1.02217	0.993534	1.00785
C10053	194310	210622	196360	230679	212402	244998	240818	287202	247263	238173	243400	240786	200791	1.20928	1.69987	1.58713	1.19935	1.43035	1.23144	1.18617	1.2122	1.19919
C13750	2.07474e+06	746300	763717	771296	773499	992695	880697	738956	815068	3.01631e+06	1.80027e+06	2.40829e+06	1.26798e+06	0.676698	0.589103	0.581882	0.694565	0.58278	0.642806	2.37882	1.41979	1.8993
C01768	876579	260917	270133	1.26045e+06	273416	1.10192e+06	1.19157e+06	290704	1.46186e+06	1.02726e+06	1.10827e+06	1.06776e+06	570487	2.23586	0.499208	0.477824	2.08869	0.509572	2.56248	1.80067	1.94267	1.87167
C15758	578024	589801	569169	607945	547359	593124	583812	546846	576680	596081	579168	587625	575866	1.03948	0.910665	0.897629	1.0138	0.949607	1.00141	1.0351	1.00574	1.02042
C02771	157380	154614	156490	160364	159477	162454	160782	158822	162636	149976	152607	151291	154594	1.06389	1.04383	1.07784	1.04003	1.02735	1.05202	0.970126	0.987147	0.978636
C06462	501358	538965	496521	540665	476143	587354	566895	475716	549979	499025	566798	532912	515542	1.02272	0.934147	0.922781	1.09961	0.922751	1.0668	0.967963	1.09942	1.03369
C19798	348440	370914	369687	371262	374422	385541	426313	357701	365053	357017	363417	360217	362162	1.14685	0.998398	1.04631	1.17713	0.987682	1.00798	0.985793	1.00346	0.994629
C14765	493465	490518	465947	490463	486337	502802	486390	499909	477681	480855	488005	484430	477254	0.990722	1.0022	1.04223	1.01914	1.04747	1.0009	1.00755	1.02253	1.01504
C02010	616545	642299	640175	646528	648374	667628	792089	619419	658529	618234	670418	644326	637139	1.2482	0.982736	1.02989	1.2432	0.972188	1.03357	0.970329	1.05223	1.01128
C00596	569492	546108	571318	589838	581409	597877	623778	608233	570254	718644	606848	662746	561441	1.00062	1.02817	1.08996	1.11103	1.08334	1.0157	1.28	1.08088	1.18044
C07927	762145	778705	757744	799529	832576	826780	835841	846969	771130	804980	797341	801160	763336	1.0868	1.10692	1.07952	1.09498	1.10956	1.01021	1.05456	1.04455	1.04955
C19158	480123	468476	490103	507305	521640	471762	481763	526595	487311	500732	492910	496821	477842	1.07032	1.05157	1.06717	1.00821	1.10203	1.01982	1.0479	1.03153	1.03972
C14574	280773	300446	296740	314484	306441	325382	313267	335804	308393	324069	313213	318641	289265	1.13181	1.22661	1.17622	1.08298	1.16089	1.06613	1.12032	1.08279	1.10156
C14592	534687	584977	598783	524208	569997	578898	462825	480559	433913	500192	514224	507208	563758	0.974463	0.949399	1.03902	0.820964	0.852421	0.76968	0.887247	0.912136	0.899691
C16449	379749	438506	451448	447640	450970	397434	385334	379487	371453	413481	407444	410463	418445	1.03329	1.1415	1.15732	0.92087	0.906899	0.887699	0.988136	0.97371	0.980923
C14328	188001	170865	165275	216171	254898	226267	206303	226695	224237	195753	206162	200958	177151	1.26374	1.33707	1.40756	1.16456	1.27967	1.2658	1.10501	1.16376	1.13438
C12045	252643	222870	229706	369298	255425	384315	473567	268233	493363	639882	530566	585224	292178	1.08191	0.89027	0.864602	1.62082	0.918044	1.68857	2.19004	1.8159	2.00297
C14039	321405	300221	303482	319449	316762	327486	316407	325602	299865	309180	307178	308179	314394	0.945875	0.990895	1.03047	1.0064	1.03565	0.953788	0.983416	0.977047	0.980232
C01632	63928	62787.2	65843	76016.4	69447.4	76659.9	68097.7	71527.7	66560.1	69597.4	68358.9	68978.2	64358.2	1.20041	1.07206	1.14765	1.0581	1.1114	1.03421	1.08141	1.06216	1.07178
C07445	503872	393028	359289	496005	624140	507087	439567	613074	448888	441459	454721	448090	438975	1.37585	1.70229	1.81981	1.00135	1.3966	1.02258	1.00566	1.03587	1.02077
C09593	357201	325890	249353	468389	481134	431435	428920	422764	461712	387142	386396	386769	317288	1.35173	1.42365	1.36514	1.35183	1.33243	1.45519	1.22016	1.21781	1.21899
C06668	625507	616857	602372	640927	752956	655233	677148	714363	624422	601913	644053	622983	614993	1.07765	1.19628	1.16229	1.10107	1.16158	1.01533	0.978731	1.04725	1.01299
C01489	130048	112686	98156	148026	182107	158747	150976	170261	149381	143480	151848	147664	115682	1.33882	1.61328	1.54507	1.30509	1.4718	1.2913	1.24029	1.31263	1.27646
C00826	38272.7	37545.9	37996.1	38616.9	38794.5	37835.6	40228.3	39993	38484.9	37454.3	38679.1	38066.7	37532	1.05597	1.04446	1.04108	1.07184	1.06557	1.02539	0.997931	1.03056	1.01425
C02214	579965	707078	628099	614256	679304	663502	626723	631912	618414	641770	621933	631851	634514	1.09553	1.06591	1.22476	0.987722	0.995899	0.974626	1.01144	0.980171	0.995803
C08809	594533	590343	597485	645962	565051	606841	678364	547426	637936	581087	660569	620828	599279	0.961577	0.955476	0.92167	1.13197	0.913474	1.0645	0.969644	1.10227	1.03596
C11228	248782	217719	224396	360761	249521	375431	382072	262032	459863	556609	417377	486993	280465	1.06477	0.906012	0.886983	1.36228	0.934277	1.63965	1.98459	1.48816	1.73638
C08776	236838	234095	237272	252280	248862	251421	247772	248057	255105	245694	238681	242188	241040	1.06391	1.05837	1.05225	1.02793	1.02911	1.05835	1.01931	0.990213	1.00476
C08022	769264	581581	579753	918779	593666	748266	1.07687e+06	563832	963253	732755	776063	754409	681025	1.02784	0.830879	0.850227	1.58125	0.827917	1.41442	1.07596	1.13955	1.10776
C03872	470813	495587	491732	494118	490047	493848	509906	486598	509120	504236	499075	501656	485896	1.01373	0.971597	0.972692	1.04941	1.00145	1.0478	1.03775	1.02712	1.03243
C14846	82611.4	123160	75252.9	120016	233600	71902.1	75794	77566.5	182983	45189	28550.1	36869.6	106713	3.60712	1.54593	0.828627	0.710263	0.726872	1.71473	0.423465	0.267542	0.345503
C04067	84899.2	86063.5	85873.8	87710.7	82772.7	77785.8	90373.1	91319	79131.4	79290	84280.3	81785.1	84530.7	0.99663	1.09097	1.01741	1.06912	1.08031	0.936127	0.938003	0.997038	0.96752
C00214	79082.5	80167.1	79990.4	81701.5	77101.8	72456.5	84181.4	85062.6	73709.9	73857.6	78506.1	76181.9	78739.3	0.99663	1.09097	1.01741	1.06912	1.08031	0.936127	0.938003	0.997038	0.96752
C10586	1.68772e+06	636951	709470	1.71956e+06	2.33638e+06	1.92099e+06	2.00134e+06	2.21712e+06	2.04793e+06	1.86244e+06	2.09481e+06	1.97863e+06	1.17219e+06	1.57717	1.91922	1.74393	1.70735	1.89143	1.7471	1.58885	1.78709	1.68797
C07317	224673	215519	221446	229600	230944	228172	232466	233622	228170	225217	218557	221887	223840	1.02953	1.02861	1.02212	1.03854	1.0437	1.01935	1.00616	0.976402	0.991279
C15424	352384	198228	197863	305202	603685	264784	384815	576439	243423	287220	430199	358710	253462	6.30997	4.28724	3.55279	1.51823	2.27426	0.960392	1.13319	1.69729	1.41524
C04454	499593	501802	461559	539849	460302	497758	533654	483903	495927	486320	545950	516135	486440	1.05722	0.961105	0.995504	1.09706	0.994784	1.0195	0.999752	1.12234	1.06104
C08853	634283	646643	634714	648803	579264	655334	633566	613533	621886	632366	658699	645532	633614	1.04502	0.95312	0.939453	0.999924	0.968308	0.98149	0.99803	1.03959	1.01881
C20424	1.25965e+06	1.33975e+06	1.33315e+06	1.32398e+06	1.55739e+06	1.28684e+06	1.33999e+06	1.24408e+06	1.30412e+06	1.28372e+06	1.24178e+06	1.26275e+06	1.30472e+06	0.981155	1.24961	1.08767	1.02703	0.953526	0.999541	0.983908	0.951764	0.967836
C11019	241609	209873	201971	286171	342678	289023	283420	289201	286582	249667	287268	268468	217159	1.25237	1.53682	1.51942	1.30513	1.33175	1.31969	1.1497	1.32285	1.23627
C20045	790764	632085	606784	1.10602e+06	658189	1.06193e+06	1.33197e+06	643350	1.16988e+06	878353	1.35855e+06	1.11845e+06	712685	1.66992	0.888789	0.916491	1.86895	0.902713	1.64151	1.23246	1.90624	1.56935
C20417	2.71294e+06	959654	2.94399e+06	1.56759e+06	1.00148e+06	833903	745083	581723	900244	437591	439961	438776	1.99867e+06	0.21851	0.384056	0.212561	0.372789	0.291055	0.450422	0.218941	0.220127	0.219534
C11819	564391	571916	567149	583753	597613	574451	592448	581131	575346	590427	579837	585132	566230	1.02534	0.996139	1.01045	1.0463	1.02632	1.0161	1.04273	1.02403	1.03338
C01091	995091	1.11984e+06	1.02e+06	2.9022e+06	1.18134e+06	1.12693e+06	1.39299e+06	819019	1.12657e+06	782031	956518	869274	1.04034e+06	0.947185	0.703577	0.719961	1.33898	0.78726	1.08289	0.751705	0.919426	0.835566
C16919	547950	563620	556152	521296	681256	533360	578404	614410	557746	566140	538193	552166	555986	1.03822	1.19559	1.13045	1.04032	1.10508	1.00316	1.01826	0.967996	0.993129
C10426	56777.4	56580.7	59407.9	56085.8	52550.1	56031.1	55904	56933.1	51478	50849.5	51557.7	51203.6	57246.1	0.880974	0.945964	0.955221	0.976555	0.994532	0.899239	0.888261	0.900632	0.894447
C04411	178495	139140	145439	206106	272557	208948	219168	225476	214173	171677	213539	192608	156335	1.3522	1.69427	1.51602	1.40192	1.44226	1.36996	1.09814	1.36591	1.23202
C00337	531219	546443	535838	601988	567908	571983	573792	544852	586747	573520	570504	572012	542743	1.04296	1.03045	1.11426	1.05721	1.00389	1.08108	1.05671	1.05115	1.05393
D02982	882485	1.0134e+06	869167	1.14064e+06	1.07447e+06	1.10436e+06	974019	995908	956033	970160	1.01002e+06	990088	1.21707e+06	0.975197	0.890082	0.970229	0.800295	0.81828	0.785517	0.797125	0.829871	0.813498
C08879	1.33009e+06	1.21408e+06	1.20466e+06	1.6029e+06	1.34176e+06	1.30891e+06	1.29005e+06	1.29483e+06	1.4159e+06	1.51865e+06	1.59426e+06	1.55646e+06	1.24192e+06	1.06629	1.08719	1.05419	1.03875	1.0426	1.14009	1.22283	1.28371	1.25327
C18281	1.49101e+06	251468	2.82511e+06	437015	689889	204502	289566	321716	805995	157151	235476	196314	1.18171e+06	0.198899	0.20533	0.236641	0.24504	0.272246	0.68206	0.132986	0.199268	0.166127
C08437	1.21088e+06	1.21624e+06	1.21615e+06	1.26278e+06	1.11565e+06	1.20644e+06	1.32612e+06	1.17285e+06	1.30672e+06	1.18646e+06	1.32324e+06	1.25485e+06	1.21427e+06	1.02651	0.921839	0.966593	1.09212	0.965894	1.07614	0.977103	1.08974	1.03342
C01266	851624	840236	852202	888513	801048	879888	856019	851698	883984	849049	884406	866728	845487	1.06143	1.01309	0.965895	1.01246	1.00735	1.04553	1.00421	1.04603	1.02512
C07125	1.03243e+06	1.07254e+06	1.02075e+06	1.06622e+06	1.27625e+06	1.09325e+06	1.08118e+06	1.10148e+06	1.06271e+06	1.06294e+06	1.03382e+06	1.04838e+06	1.03683e+06	1.08526	1.24979	1.2022	1.04278	1.06235	1.02496	1.02518	0.997096	1.01114
C12304	475526	505873	490865	487026	417769	491287	468938	478466	487674	431730	485762	458746	486197	0.97099	0.898379	0.885519	0.964501	0.984098	1.00304	0.887972	0.999106	0.943539
C08415	674098	678080	676806	703726	686451	678451	664788	643481	673153	675465	689400	682432	669286	1.0365	0.951629	1.00099	0.993279	0.961444	1.00578	1.00923	1.03005	1.01964
C17008	359758	377930	369176	382266	355689	378537	367074	355334	370057	381989	372709	377349	369159	1.00636	0.970947	0.9887	0.994351	0.962551	1.00243	1.03475	1.00961	1.02218
C17703	1.05632e+06	271749	283314	1.14397e+06	1.17803e+06	1.0077e+06	1.15992e+06	1.40881e+06	1.21582e+06	1.27337e+06	1.17001e+06	1.22169e+06	674769	1.50525	1.82555	1.72775	1.71899	2.08784	1.80184	1.88711	1.73395	1.81053
C09808	1.00767e+06	972430	976323	1.13227e+06	1.08152e+06	1.12437e+06	1.14814e+06	984060	1.13922e+06	1.04849e+06	1.12057e+06	1.08453e+06	981642	1.12253	1.07494	1.08333	1.16961	1.00246	1.16053	1.0681	1.14153	1.10482
C05452	254054	233139	224170	309787	388279	316694	334531	337046	302784	254822	339312	297067	241811	1.29314	1.52604	1.41204	1.38344	1.39384	1.25215	1.05381	1.40321	1.22851
C01104	631274	654204	625525	619856	634173	578153	525505	562155	547774	572995	509887	541441	639089	0.911316	0.94065	1.00107	0.822271	0.87962	0.857117	0.896581	0.797833	0.847207
C18213	494505	558896	521939	516349	470142	552966	507113	497297	527500	513771	515479	514625	523113	0.963174	0.897203	0.904735	0.969414	0.950649	1.00839	0.982141	0.985407	0.983774
C19119	537133	552526	506685	516859	537762	550304	647217	508636	726139	532573	569367	550970	529993	1.00986	1.03562	1.0705	1.22118	0.959704	1.37009	1.00487	1.07429	1.03958
C19218	360879	370546	325547	427721	434116	427599	396752	394627	415953	381141	416785	398963	348339	1.16175	1.14044	1.12414	1.13898	1.13288	1.1941	1.09417	1.19649	1.14533
C15767	1.03264e+06	1.10113e+06	1.0996e+06	1.11209e+06	1.04045e+06	1.11141e+06	962226	875533	1.00681e+06	959820	1.01625e+06	988033	1.04141e+06	1.03546	1.0582	1.07287	0.923965	0.84072	0.966778	0.921655	0.975837	0.948746
C14470	306502	303728	320072	332343	292274	312216	341649	281647	328214	298966	320347	309656	310908	0.969248	0.853125	0.951273	1.09887	0.905885	1.05566	0.961589	1.03036	0.995973
C16868	694164	707177	702774	713307	665029	696928	689588	673618	692564	688426	701977	695202	693431	1.01571	0.997571	0.973664	0.994458	0.971427	0.998749	0.992782	1.01232	1.00255
C09996	247340	262869	246982	258068	246119	258253	257060	241340	247035	249467	242921	246194	251936	1.0112	0.975401	1.0037	1.02034	0.957943	0.980545	0.990197	0.964216	0.977207
C05340	735354	716773	714402	720619	723553	765015	883931	691240	757042	726053	748153	737103	722845	1.26356	0.966652	1.01304	1.22285	0.956277	1.04731	1.00444	1.03501	1.01973
C13429	213222	164098	167997	226391	293518	253135	243894	263214	276180	198824	241052	219938	186771	1.28336	1.67263	1.45734	1.30584	1.40929	1.47871	1.06454	1.29063	1.17758
C12954	465788	133877	138092	482712	420079	524957	523459	459823	429669	456435	453738	455087	304806	1.69291	1.97397	1.81829	1.71735	1.50858	1.40965	1.49746	1.48861	1.49304
C16488	434599	353112	338978	563877	367696	543648	613846	355237	596435	490689	744138	617414	396350	1.4285	0.892802	0.92063	1.54875	0.896272	1.50482	1.23802	1.87748	1.55775
C18889	192261	172370	176770	745032	390358	1.45725e+06	772358	674737	1.37752e+06	496363	629221	562792	203388	2.83571	1.67395	1.58939	3.79747	3.31749	6.77291	2.44048	3.09371	2.76709
C10217	323673	332913	363337	359757	339237	343936	322983	345559	340636	336292	322606	329449	330973	1.06062	1.1793	1.16256	0.975857	1.04407	1.02919	1.01607	0.974719	0.995395
C05849	315336	277785	288290	332385	403150	346052	349442	361721	349529	322243	341276	331760	295280	1.14454	1.24458	1.21089	1.18343	1.22501	1.18372	1.09131	1.15577	1.12354
C05913	433753	443394	447630	499120	450699	456260	476365	2.61051e+06	499365	486853	488121	487487	442118	1.04083	0.954126	1.02782	1.07746	5.90455	1.12948	1.10118	1.10405	1.10262
C05619	518488	451729	458283	547078	625697	548867	565606	559366	538863	522090	541597	531843	490482	1.13537	1.24715	1.15188	1.15316	1.14044	1.09864	1.06444	1.10421	1.08433
C14114	750256	301412	289595	761745	936625	824330	857305	890416	788795	790564	882881	836722	505504	1.47115	1.80184	1.75719	1.69594	1.76144	1.56041	1.56391	1.74654	1.65522
C06533	445197	467684	464137	473050	450965	468436	454251	439723	457942	472707	461223	466965	458652	1.01006	0.967092	0.984774	0.990403	0.958728	0.998451	1.03064	1.00561	1.01812
C11571	144279	160613	150560	175908	163719	186827	160774	199964	166065	168090	173454	170772	150181	1.20718	1.29791	1.34871	1.07054	1.33149	1.10577	1.11925	1.15497	1.13711
C10333	350239	379641	355878	415793	394300	441603	454165	537255	445685	429301	438722	434012	363715	1.23854	1.69148	1.5793	1.24868	1.47713	1.22537	1.18032	1.20622	1.19327
C18461	561707	614910	584295	609366	624860	590933	628872	636921	628290	608291	595017	601654	583945	1.01033	1.0689	1.07089	1.07694	1.09072	1.07594	1.04169	1.01896	1.03033
C10391	272196	234637	266328	298382	270198	288175	275814	259128	367976	269149	297282	283215	256771	1.07346	3.80773	4.79165	1.07416	1.00918	1.43309	1.0482	1.15777	1.10299
C05730	2.52462e+06	492422	483717	1.14346e+06	535317	1.12465e+06	1.42191e+06	566637	1.46294e+06	1.09008e+06	1.57742e+06	1.33375e+06	1.122e+06	1.00537	0.498218	0.475131	1.2673	0.505022	1.30387	0.97155	1.4059	1.18872
C02376	349839	358159	322756	436861	407486	411889	419756	369729	412296	381141	416785	398963	344716	1.24974	1.22908	1.2024	1.21769	1.07256	1.19604	1.10567	1.20907	1.15737
C18081	387606	306592	275831	406624	494471	416524	338139	511704	340347	345586	383141	364363	337365	1.37715	1.75411	2.11329	1.00229	1.51676	1.00884	1.02437	1.13568	1.08003
C09575	19743.7	15804.9	20172.9	16589.2	17740	16559.5	16538	16725.5	16141.2	16774.4	17451.5	17113	18547.7	0.903381	0.919899	0.9431	0.891643	0.901754	0.870253	0.904393	0.940894	0.922644
C07366	261134	271438	269175	273089	283634	269351	281182	275811	273066	261486	274786	268136	267056	0.995772	1.00242	1.0074	1.0529	1.03278	1.0225	0.979144	1.02894	1.00404
C05786	260236	259431	284801	272618	223946	275615	268458	241912	282987	282601	281811	282206	269167	1.11601	0.858226	0.902822	0.997366	0.898744	1.05134	1.04991	1.04697	1.04844
C13711	1.45412e+06	1.44196e+06	1.43922e+06	1.53511e+06	1.46627e+06	1.49843e+06	1.48898e+06	1.46931e+06	1.42751e+06	1.47243e+06	1.41763e+06	1.44503e+06	1.43427e+06	0.999515	1.03935	1.04648	1.03815	1.02444	0.995288	1.02661	0.988405	1.00751
C18363	1.69545e+06	1.67191e+06	1.69052e+06	1.81761e+06	1.82765e+06	1.84741e+06	1.77127e+06	1.74462e+06	1.68745e+06	1.81067e+06	1.79546e+06	1.80306e+06	1.68528e+06	1.06758	1.07731	1.07496	1.05102	1.03521	1.00129	1.0744	1.06538	1.06989
C13838	808928	161449	162547	852166	990968	844156	881780	936217	807935	834683	901933	868308	462967	1.73933	2.14931	1.9636	1.90463	2.02221	1.74512	1.8029	1.94816	1.87553
C07250	462213	201143	195299	565365	228201	573012	631560	223874	658386	533918	854165	694042	309487	1.65783	0.724001	0.723409	2.04067	0.723371	2.12735	1.72517	2.75994	2.24255
C01546	241315	264878	264404	268508	288314	292884	279428	247431	273658	288286	267006	277646	252793	1.08339	1.17936	1.1179	1.10536	0.978788	1.08254	1.14041	1.05622	1.09831
C13721	103432	110459	106298	109853	108973	111634	106631	99730.9	102209	101849	106811	104330	105745	1.02922	0.953007	0.944274	1.00838	0.943122	0.966555	0.963156	1.01008	0.986616
C05146	435582	420765	457658	428174	443470	396792	478246	466329	437210	550980	455294	503137	433425	0.993761	1.02112	1.08248	1.10341	1.07591	1.00873	1.27122	1.05046	1.16084
C08775	1.06716e+06	1.13132e+06	1.09682e+06	1.14174e+06	1.00606e+06	1.13552e+06	1.10546e+06	1.06911e+06	1.10651e+06	1.09663e+06	1.08542e+06	1.09102e+06	1.09523e+06	1.02334	0.891123	0.878366	1.00934	0.976149	1.01029	1.00127	0.991036	0.996153
C06967	607452	639031	600967	582396	544071	619406	608529	541640	619072	594406	588213	591309	605519	0.997957	0.895147	0.897269	1.00497	0.894505	1.02238	0.981646	0.971419	0.976533
C11188	310378	308252	314908	336417	332103	345768	326955	319369	341660	343214	347235	345225	316070	1.06181	0.943977	1.09463	1.03444	1.01044	1.08096	1.08588	1.0986	1.09224
C07846	449745	360489	360899	503077	532364	504013	492603	497923	478349	466426	489299	477863	406163	1.20481	1.3245	1.2962	1.21282	1.22592	1.17773	1.14837	1.20469	1.17653
C16408	339284	289840	264028	478050	551553	472986	364358	359719	441737	406604	414037	410321	298954	1.64167	1.76006	1.87372	1.21878	1.20326	1.47761	1.36009	1.38495	1.37252
C09018	1.63679e+06	574897	584197	687387	587392	669909	735063	553038	798780	892825	790768	841797	849642	0.773746	0.670784	0.674343	0.865145	0.650907	0.940137	1.05082	0.930708	0.990766
C00363	308603	323155	330259	325918	339630	347856	354278	340619	328858	367311	381010	374160	319056	1.03271	1.0995	1.14186	1.11039	1.06758	1.03072	1.15124	1.19418	1.17271
C11437	225450	221969	219656	237841	343323	246188	279364	333710	264597	230318	279719	255018	222730	1.27813	1.47562	1.18461	1.25427	1.49827	1.18797	1.03407	1.25587	1.14497
C01474	685146	615682	613328	620246	681208	683931	689043	617065	658521	655918	631231	643574	642233	0.983548	1.05902	1.0821	1.07289	0.960812	1.02536	1.02131	0.98287	1.00209
C08186	1.25622e+06	643929	644315	1.49804e+06	1.27898e+06	1.41218e+06	1.60483e+06	664598	1.59363e+06	1.4173e+06	1.5505e+06	1.4839e+06	972600	1.49109	1.83256	0.992448	1.65004	0.683321	1.63853	1.45723	1.59418	1.5257
C13757	801764	934698	920372	908162	905989	931848	832439	763831	834426	807154	839805	823480	860530	1.09699	0.988612	1.18753	0.967355	0.887628	0.969664	0.937973	0.975916	0.956944
C19949	469400	481659	482308	483386	514589	480680	481790	481687	485678	474278	482912	478595	470061	0.97812	1.12295	1.10261	1.02495	1.02473	1.03322	1.00897	1.02734	1.01816
C03215	524122	537784	541331	538575	491385	529117	506385	503326	526529	533281	530021	531651	530530	0.983507	0.935106	0.943614	0.95449	0.948723	0.992458	1.00519	0.999041	1.00211
C09661	373490	376164	371082	379269	382534	381957	405934	380411	384736	375290	387560	381425	372785	1.02997	0.99697	1.08243	1.08892	1.02046	1.03206	1.00672	1.03963	1.02318
C11315	317785	372457	367419	374598	369154	383006	322458	343399	310842	346012	340961	343487	348951	1.03689	1.05327	1.21024	0.924079	0.98409	0.890791	0.991579	0.977103	0.984341
C00805	553097	423052	437835	561295	606566	598062	593953	607248	582238	581498	579584	580541	486655	1.13231	1.22189	1.22074	1.22048	1.2478	1.19641	1.19489	1.19095	1.19292
C08706	235619	242980	223348	243743	218606	240782	224312	220721	239604	235693	237393	236543	232504	1.02124	0.959825	0.979819	0.964767	0.949322	1.03054	1.01372	1.02103	1.01737
C06918	278907	278322	281136	275559	277305	269082	280645	285045	274645	276050	275285	275667	277572	0.987047	1.0594	1.07976	1.01107	1.02692	0.989453	0.994515	0.991758	0.993136
C20380	277173	232309	229747	343057	917171	332784	383401	278029	451399	326889	415413	371151	253952	1.37356	1.21796	1.19431	1.50974	1.09481	1.7775	1.28721	1.63579	1.4615
C06627	138319	140808	132066	149204	154805	164462	173813	236877	164155	151545	175735	163640	138113	1.24826	1.64469	1.51361	1.25849	1.71509	1.18856	1.09726	1.2724	1.18483
C08630	305240	124679	111479	337067	414815	366160	370006	363263	363533	305006	369278	337142	215100	1.58132	1.85766	1.85918	1.72015	1.68881	1.69006	1.41797	1.71677	1.56737
C02703	1.66661e+06	414604	597281	432624	544386	442290	383398	534734	391528	385048	396616	390832	1.24432e+06	0.423354	0.523801	0.870277	0.308118	0.42974	0.314652	0.309445	0.318741	0.314093
C12287	254571	219576	209962	296004	396955	320959	314415	320102	305998	286477	314459	300468	234297	1.24915	1.60548	1.45177	1.34195	1.36622	1.30602	1.22271	1.34214	1.28242
C06678	2.07379e+06	2.08169e+06	2.13689e+06	2.07326e+06	2.17932e+06	2.16499e+06	2.11822e+06	2.09973e+06	2.18811e+06	2.10865e+06	2.0453e+06	2.07698e+06	2.11079e+06	1.00502	1.04237	1.01327	1.00352	0.99476	1.03663	0.998987	0.968975	0.983981
C09478	241401	193722	194758	260777	418667	282596	309080	362617	289278	286248	328190	307219	218499	1.27245	2.3285	1.71057	1.41456	1.65958	1.32393	1.31006	1.50202	1.40604
C03972	729752	677369	724458	770226	754041	763944	756265	762044	735607	718512	730251	724381	714346	1.08966	1.15922	1.05702	1.05868	1.06677	1.02976	1.00583	1.02226	1.01405
C07023	152578	131203	131144	162658	191093	174760	171573	173508	170871	150783	148890	149836	134892	1.16603	1.28128	1.32917	1.27192	1.28628	1.26672	1.11781	1.10377	1.11079
C13826	357334	362316	377567	422334	328686	388937	359972	356903	381760	385731	359026	372378	366059	1.05741	0.885414	0.877224	0.98337	0.974988	1.04289	1.05374	0.980786	1.01726
C12062	730938	731819	755502	789960	662279	786927	742305	678264	735781	741883	758850	750367	744519	1.04107	0.955239	1.02486	0.997027	0.91101	0.988263	0.996459	1.01925	1.00785
C16850	201250	170170	169057	208441	234294	219460	225214	215205	211793	209468	208401	208934	188641	1.15864	1.2819	1.22684	1.19388	1.14082	1.12273	1.1104	1.10475	1.10758
C19783	254620	238226	243652	257948	262545	243534	281677	255128	257507	320647	260727	290687	246339	1.02982	1.05818	1.12176	1.14345	1.03568	1.04534	1.30165	1.05841	1.18003
C16903	346081	373516	357284	355398	353587	361469	351161	347911	352511	348435	351024	349730	356359	1.00409	0.96867	0.972036	0.985413	0.976292	0.9892	0.977764	0.985029	0.981397
C12393	1.64583e+06	1.68155e+06	1.58712e+06	1.71485e+06	1.95776e+06	1.82748e+06	1.76065e+06	1.89971e+06	1.75115e+06	1.6693e+06	1.79788e+06	1.73359e+06	1.6446e+06	1.09785	1.16314	1.14335	1.07056	1.15513	1.06479	1.01502	1.0932	1.05411
C07518	422706	329718	301413	416106	523601	425404	368760	514318	376579	370347	381473	375910	368263	1.37585	1.70229	1.81981	1.00135	1.3966	1.02258	1.00566	1.03587	1.02077
C02137	331865	326567	337971	350962	344282	348930	337579	335896	333972	342903	334316	338610	331873	1.06231	1.05279	1.10364	1.01719	1.01212	1.00632	1.03324	1.00736	1.0203
C11806	225916	205377	195984	285261	410338	582195	582154	595868	1.22057e+06	1.23942e+06	517700	878562	329759	3.91643	1.33493	1.02221	1.76539	1.80698	3.7014	3.75858	1.56993	2.66426
C06725	148659	157414	162042	163513	166955	167938	159304	168504	163777	161053	162544	161799	152513	1.01558	1.08568	1.19242	1.04453	1.10485	1.07386	1.056	1.06577	1.06088
C08157	131990	146495	129998	161938	160705	162568	143336	148954	137404	145103	143928	144516	139359	1.17661	1.27243	1.27125	1.02854	1.06885	0.985969	1.04122	1.03279	1.037
C09360	328925	350740	350254	354232	331414	354015	289100	278882	299133	294748	323702	309225	326506	1.05198	1.07509	1.08999	0.885433	0.854139	0.916163	0.902733	0.991412	0.947073
C16542	2.00398e+06	2.04154e+06	2.01729e+06	2.08115e+06	2.17071e+06	2.00596e+06	2.02607e+06	1.9678e+06	1.97553e+06	2.01386e+06	2.00219e+06	2.00802e+06	2.02671e+06	1.01689	0.980303	0.996288	0.999684	0.970935	0.974748	0.99366	0.987901	0.990781
C17397	632472	1.01028e+06	356466	515672	496900	772220	609896	945866	502800	555207	494356	524781	636781	1.00842	1.37762	0.892152	0.957779	1.48539	0.789596	0.871895	0.776336	0.824116
C01784	285692	278322	243674	308520	325316	323173	320961	315739	301984	313741	312037	312889	275177	1.13217	1.15161	1.16041	1.16638	1.1474	1.09742	1.14014	1.13395	1.13705
C19032	555244	602264	430144	844614	867279	656730	645091	680308	886514	597866	866820	732343	549742	2.74538	1.22399	1.41909	1.17344	1.2375	1.6126	1.08754	1.57678	1.33216
C09286	240226	224588	235096	249097	234477	236775	242666	241525	239327	228536	227089	227812	233770	1.07565	1.02189	1.01743	1.03805	1.03317	1.02377	0.977607	0.971421	0.974514
C07427	817154	741757	731498	782136	812457	815705	821802	780855	788608	782294	756100	769197	767835	0.981162	1.05645	1.07948	1.07028	1.01696	1.02705	1.01883	0.984717	1.00177
C09264	312481	328234	306009	359491	344053	381806	392668	535137	385336	371170	397010	384090	316462	1.23073	1.68081	1.56933	1.2408	1.691	1.21764	1.17288	1.25453	1.2137
C17220	1.90256e+06	1.99668e+06	1.95257e+06	1.98424e+06	1.90197e+06	1.96489e+06	1.94342e+06	1.88101e+06	1.92087e+06	1.9828e+06	1.93463e+06	1.95871e+06	1.94418e+06	0.999491	0.983618	1.0109	0.999606	0.967504	0.988006	1.01986	0.995086	1.00747
C10668	1.927e+06	1.89298e+06	1.90961e+06	1.96744e+06	1.98858e+06	1.94412e+06	1.92777e+06	1.90482e+06	1.93598e+06	1.92313e+06	1.9237e+06	1.92341e+06	1.91208e+06	1.00544	1.01309	1.02883	1.00821	0.996202	1.0125	1.00578	1.00608	1.00593
C11112	1.01777e+06	600535	605363	633198	650879	757105	652720	673962	636417	619960	675099	647529	699076	0.994288	0.934441	0.960894	0.93369	0.964076	0.910369	0.886828	0.965702	0.926265
C01298	230681	201151	191404	263412	311780	271318	259493	267494	270031	222367	262747	242557	207052	1.29313	1.55124	1.43835	1.25327	1.29192	1.30417	1.07396	1.26899	1.17148
C07415	190614	154402	141147	191100	235427	199210	157582	205144	161570	163188	178638	170913	170619	1.14757	1.45879	1.36033	0.923595	1.20236	0.946964	0.956449	1.047	1.00173
C01804	655943	646872	631682	672114	789594	687115	710096	749123	654805	631201	675391	653296	644917	1.07765	1.19628	1.16229	1.10107	1.16158	1.01533	0.978731	1.04725	1.01299
C14472	625505	616855	602370	640926	775599	655231	677146	714362	645276	631060	644051	637556	614991	1.07765	1.22992	1.16229	1.10107	1.16158	1.04924	1.02613	1.04725	1.03669
C01526	415244	355692	374906	438886	502139	454965	429169	458987	454648	395746	440319	418033	381055	1.14501	1.28009	1.23249	1.12626	1.20451	1.19313	1.03855	1.15553	1.09704
C09999	1.15981e+06	692437	689893	1.31928e+06	903738	1.41117e+06	1.58221e+06	810670	1.53981e+06	1.39551e+06	1.47798e+06	1.43675e+06	949170	1.48703	0.905884	0.973497	1.66694	0.854083	1.62228	1.47024	1.55713	1.51369
C18857	253541	199956	203395	324218	927304	324622	363676	283351	349939	338164	389491	363827	228272	1.39421	2.78926	1.3576	1.59317	1.24129	1.53299	1.48141	1.70626	1.59384
C14339	680914	680198	674626	717669	934128	700729	728993	787686	723847	707901	722473	715187	681023	1.05891	1.29677	1.1774	1.07044	1.15662	1.06288	1.03947	1.06086	1.05017
C05660	308856	336236	350015	338673	329897	334540	352617	336046	331493	327034	332515	329774	325820	1.01516	1.16497	1.14843	1.08225	1.03138	1.01741	1.00372	1.02055	1.01214
C19098	262155	127542	145165	309283	138305	317051	361571	127723	346222	319320	337930	328625	209526	1.40609	0.646916	0.686273	1.72566	0.609579	1.65241	1.52401	1.61283	1.56842
C11155	398502	360664	383381	409157	414570	421886	420299	420328	403481	413009	398824	405917	389451	1.08396	1.08927	1.12101	1.07921	1.07928	1.03602	1.06049	1.02407	1.04228
C13522	224114	204275	213567	250789	233101	260226	221286	232134	237670	250650	241832	246241	216627	1.23823	1.03344	1.23038	1.02151	1.07158	1.09714	1.15706	1.11635	1.1367
C14216	259803	272901	254423	298889	286053	317442	326472	444924	320376	308599	330082	319341	263113	1.23073	1.68081	1.56933	1.2408	1.691	1.21764	1.17288	1.25453	1.2137
C03167	196067	194688	194529	198157	199754	200101	198870	198829	196980	198910	194233	196572	193290	1.06207	1.03949	1.00901	1.02887	1.02866	1.01909	1.02908	1.00488	1.01698
C17103	225176	235001	224315	222651	230566	237246	247383	232266	221892	219680	222234	220957	227209	0.967485	1.00319	1.05208	1.08879	1.02226	0.976597	0.966864	0.978103	0.972483
C07280	852610	817600	855344	885367	910384	895106	933883	919031	853750	1.07591e+06	908537	992224	840557	1.0619	1.0433	1.08996	1.11103	1.09336	1.0157	1.28	1.08088	1.18044
C09419	215299	216018	203238	237756	267613	258703	250414	270135	255686	230283	248306	239295	214033	1.07906	1.3037	1.18112	1.16998	1.26212	1.19461	1.07592	1.16013	1.11803
C05270	153561	143273	132946	187747	178865	180797	174153	162292	180976	167301	182947	175124	143611	1.07565	1.13732	1.17474	1.21267	1.13008	1.26018	1.16496	1.27391	1.21943
C17167	466146	469825	471119	547049	478460	531791	562004	477723	560245	519702	530655	525178	470823	1.07512	1.08282	0.975484	1.19366	1.01465	1.18993	1.10382	1.12708	1.11545
C16884	621976	578137	507929	643391	650053	685536	680826	666110	649371	635329	664355	649842	574306	1.09984	1.17791	1.18573	1.18548	1.15985	1.13071	1.10626	1.1568	1.13153
C08661	220925	234626	236261	232331	223572	230268	227420	226459	228512	231437	220418	225928	229095	1.03355	1.0151	0.99077	0.992687	0.988493	0.997456	1.01022	0.962125	0.986174
C07175	273026	265967	274530	285489	275369	280920	280027	267323	277552	276816	271030	273923	268293	0.996865	1.07531	1.06642	1.04374	0.996386	1.03451	1.03177	1.0102	1.02099
C05596	390689	333528	346685	413857	473332	415210	427873	423153	402765	394954	409711	402332	368609	1.14287	1.18286	1.15458	1.16078	1.14797	1.09266	1.07147	1.11151	1.09149
C11029	196143	198220	196619	201513	201043	209443	205870	203543	201218	195597	186084	190841	197388	1.00725	1.03085	1.01697	1.04297	1.03118	1.01941	0.990931	0.942736	0.966834
C00413	230961	234550	222881	230508	222289	230963	230021	216077	234180	232382	241734	237058	228917	1.01462	0.974952	1.01137	1.00483	0.94391	1.02299	1.01514	1.05599	1.03556
C16159	800734	804274	739774	865255	737760	842451	869105	775585	818220	792893	875033	833963	779652	1.08049	0.961105	0.995504	1.11473	0.994784	1.04947	1.01698	1.12234	1.06966
C10927	523454	511859	479420	528758	576687	546764	538038	526330	509920	518977	536050	527514	512530	0.957116	1.08373	1.01962	1.04977	1.02692	0.994907	1.01258	1.04589	1.02924
C13824	350322	374844	356944	331813	342185	345958	386115	320275	410669	375964	366346	371155	358636	1.01999	1.06923	0.968466	1.07662	0.893036	1.14509	1.04832	1.0215	1.03491
C08794	633051	628187	667008	625484	749738	740958	703798	651943	700062	677972	753244	715608	649772	1.11392	1.11171	1.06127	1.08315	1.00334	1.0774	1.0434	1.15924	1.10132
C09162	555744	599800	573734	594657	567798	580454	583802	558682	567690	576085	572137	574111	576375	0.996903	0.961736	0.993591	1.01289	0.969304	0.984932	0.999496	0.992647	0.996072
C10406	347189	387518	356487	400887	378928	413010	368924	415237	373506	400726	400692	400709	358225	1.15572	1.22477	1.17446	1.02986	1.15915	1.04266	1.11864	1.11855	1.11859
C06448	575734	580277	581875	675656	590943	656810	694127	590032	691954	641880	655407	648644	581510	1.09831	1.08282	0.975484	1.19366	1.01465	1.18993	1.10382	1.12708	1.11545
C04594	92447.5	65853.9	68271.7	104170	113956	96071.8	118365	120201	109361	108106	100878	104492	77739.8	1.30338	1.73328	1.68216	1.52258	1.5462	1.40676	1.39061	1.29764	1.34413
C18692	799184	825820	794066	885710	811315	862804	928870	803440	931350	854474	892026	873250	805428	1.1208	1.06926	1.03441	1.15326	0.997532	1.15634	1.06089	1.10752	1.08421
C19015	212546	244077	207541	274724	258787	265985	234592	239864	230260	228059	243262	235660	226007	1.26483	1.15444	1.25839	1.03799	1.06131	1.01882	1.00908	1.07635	1.04271
C01523	1.03334e+06	506752	528810	1.12454e+06	516917	1.19244e+06	1.2253e+06	565674	1.22026e+06	1.13129e+06	1.22397e+06	1.17763e+06	775279	1.47635	0.670784	0.681772	1.58046	0.729639	1.57396	1.45921	1.57874	1.51897
C11841	319513	278612	258815	346730	452834	375799	359421	376392	373672	306660	367921	337290	286761	1.26138	1.49711	1.43848	1.25338	1.31256	1.30308	1.06939	1.28302	1.17621
C02304	319527	341454	295581	306556	289620	304349	314907	278988	314692	301292	302229	301761	313355	0.951897	0.868362	0.914644	1.00495	0.890324	1.00427	0.961503	0.964494	0.962999
C08613	232232	185452	178050	266265	375434	283217	293036	311289	315515	238232	302122	270177	206559	1.34948	1.66748	1.61269	1.41865	1.50702	1.52748	1.15333	1.46264	1.30799
C12044	385795	378935	397079	399331	405786	407280	408562	403976	400514	401975	395933	398954	386268	1.09047	1.01823	1.02808	1.05772	1.04584	1.03688	1.04066	1.02502	1.03284
C01618	1.48357e+06	1.51137e+06	1.46309e+06	1.5407e+06	1.60699e+06	1.45052e+06	1.49992e+06	1.45678e+06	1.4625e+06	1.49088e+06	1.48224e+06	1.48656e+06	1.48885e+06	1.02477	0.987903	1.00401	1.00743	0.978462	0.982304	1.00136	0.995559	0.998461
C08694	299419	296710	312676	324664	285520	305002	333755	275139	320630	292058	312945	302501	303724	0.969248	0.853125	0.951273	1.09887	0.905885	1.05566	0.961589	1.03036	0.995973
C04006	263876	194295	331669	690655	186352	166975	265167	326151	150806	176078	285191	230634	250283	6.41328	1.60895	1.66064	1.05947	1.30313	0.60254	0.703514	1.13947	0.921493
C17233	173477	161583	149021	201089	262625	217947	208449	212762	216714	176096	213378	194737	163082	1.28634	1.52674	1.46694	1.27818	1.30463	1.32886	1.0798	1.30841	1.19411
C06971	190135	182867	167171	253545	261240	243257	237708	235052	253873	228472	245931	237202	185908	1.34442	1.43655	1.37562	1.27864	1.26435	1.36558	1.22895	1.32287	1.27591
C01294	339600	340146	333835	346651	308931	358215	374416	310835	382298	349990	383926	366958	342353	1.04319	0.952849	0.912782	1.09365	0.907937	1.11668	1.02231	1.12143	1.07187
C10811	1.04349e+06	529857	522894	1.23607e+06	578673	1.21574e+06	1.32679e+06	612530	1.32134e+06	1.16992e+06	1.31655e+06	1.24324e+06	799743	1.49854	0.755589	0.720576	1.65902	0.765908	1.6522	1.46287	1.64622	1.55454
C19461	203254	198532	202146	208304	206216	216636	209048	211917	209739	201893	195106	198500	202134	1.01989	1.02691	1.08555	1.0342	1.0484	1.03762	0.998807	0.965229	0.982018
C00526	83527	83595.7	84262.5	87939.1	87126.2	88212.3	88440.7	90620.1	90382.9	83403.9	78379.9	80891.9	84301.6	1.04988	1.03209	1.03673	1.0491	1.07495	1.07214	0.989351	0.929756	0.959554
C08684	259630	255766	247195	264912	259377	258524	274147	258417	267448	258455	269410	263933	255019	1.04288	1.01128	1.09992	1.07501	1.01332	1.04874	1.01347	1.05643	1.03495
C16692	905037	1.05036e+06	918584	891858	1.12521e+06	908391	962809	1.01481e+06	941387	935081	891115	913098	948170	1.00552	1.15794	1.10624	1.01544	1.07028	0.992845	0.986195	0.939826	0.963011
C09874	167531	68452.7	61971.2	201038	223802	197209	176507	223500	207292	186108	201478	193793	117160	1.65821	1.22721	1.73651	1.50655	1.90765	1.76931	1.5885	1.71969	1.65409
C07650	629019	647931	598402	659949	611527	680942	673234	602523	660653	627805	635068	631437	619648	1.00617	0.941846	0.971842	1.08648	0.972363	1.06618	1.01316	1.02489	1.01903
C18299	213146	231794	218749	227657	212872	221880	228653	209572	210945	232207	229889	231048	220412	1.0098	0.999742	0.996385	1.03739	0.950822	0.957051	1.05351	1.043	1.04826
HMDB0253945	662689	651310	686358	712672	626748	669511	748420	603960	737473	641098	728788	684943	668065	0.967278	0.945613	0.94934	1.12028	0.904044	1.10389	0.959634	1.09089	1.02526
C19916	279197	265384	270888	272140	279842	276294	281799	273813	259958	271402	281715	276559	271146	1.04553	0.997606	1.01794	1.03929	1.00984	0.958737	1.00094	1.03898	1.01996
C11222	1.10335e+06	1.16968e+06	1.16814e+06	1.18045e+06	1.04017e+06	1.17403e+06	1.24099e+06	1.10537e+06	1.14403e+06	1.13382e+06	1.10225e+06	1.11803e+06	1.14091e+06	1.01569	0.868792	0.870658	1.08772	0.968849	1.00274	0.993783	0.966113	0.979948
C09055	1.1276e+06	427430	406143	1.1581e+06	1.36616e+06	1.20761e+06	1.31196e+06	1.30486e+06	1.18855e+06	1.16331e+06	1.21071e+06	1.18701e+06	782206	1.50457	1.80375	1.66443	1.67726	1.66818	1.51948	1.48721	1.54781	1.51751
C13038	282959	292538	294223	291596	297492	293856	315690	291553	289549	291858	298807	295333	289970	1.02976	0.996766	0.966233	1.0887	1.00546	0.998549	1.00651	1.03048	1.0185
C01630	215337	218453	212091	217768	235140	216671	221074	232776	221659	222625	226148	224386	214001	1.05624	1.09867	1.0959	1.03305	1.08773	1.03578	1.0403	1.05676	1.04853
C04487	1.00472e+06	955867	979188	1.04166e+06	1.35584e+06	1.03784e+06	1.02687e+06	1.1784e+06	1.05063e+06	1.06421e+06	1.04715e+06	1.05568e+06	993479	1.05358	1.29023	1.19771	1.03361	1.18614	1.05753	1.0712	1.05402	1.06261
C19350	296717	240349	219716	302526	366476	310099	260183	330586	274508	254025	278076	266050	265592	1.30202	1.52929	1.64742	0.979632	1.24471	1.03357	0.956449	1.047	1.00173
C02174	258972	250002	253698	256585	252192	259891	257826	252826	253118	256121	252744	254432	256071	1.01909	0.990147	1.00061	1.00685	0.987328	0.988467	1.00019	0.987007	0.993601
C07819	950116	946609	964913	1032303	903001	969785	1.08408e+06	891846	1.01948e+06	964640	1.05565e+06	1.01014e+06	961018	1.04231	0.952178	0.918489	1.12806	0.928023	1.06083	1.00377	1.09847	1.05112
C10560	569823	576752	546333	574219	553607	573608	580057	547542	583704	573174	567976	570575	561593	1.01404	0.941587	0.955927	1.03288	0.974979	1.03937	1.02062	1.01137	1.01599
C11655	411304	424303	423970	430134	442978	424246	445129	419588	430098	419649	432807	426228	419413	1.00265	1.00533	1.08591	1.06131	1.00042	1.02548	1.00056	1.03193	1.01625
C09210	285030	249991	259853	310200	354779	311215	320706	317168	301886	296032	307093	301562	274334	1.151	1.19127	1.16279	1.16904	1.15614	1.10043	1.07909	1.11941	1.09925
C18741	300170	232281	218442	362056	454311	350440	316786	419791	323997	262999	366725	314862	256665	1.56204	1.76021	2.08979	1.23424	1.63556	1.26233	1.02468	1.42881	1.22674
C06805	96034.3	88062.4	94699.7	92578.1	90066.1	92943.7	91202.7	90024	87142.2	90069.3	96110.8	93090.1	94531.3	0.962349	0.970851	0.986711	0.964789	0.95232	0.921835	0.9528	1.01671	0.984754
C16533	294708	271206	259658	338867	382315	354694	330224	355365	351512	308280	332410	320345	278684	1.25928	1.3891	1.39213	1.18494	1.27515	1.26133	1.1062	1.19278	1.14949
C12153	926386	987483	955347	1.01946e+06	911368	1.01997e+06	1.05568e+06	872387	963622	968305	991725	980015	968722	1.01043	0.99337	0.921951	1.08976	0.900554	0.994735	0.99957	1.02375	1.01166
C13391	341684	269858	279288	339732	359976	352259	331633	344529	361369	347204	322205	334705	304676	1.15369	1.23559	1.24379	1.08848	1.13081	1.18608	1.13959	1.05753	1.09856
C02134	333565	387208	361250	353288	390700	381612	360459	363443	355679	369113	357703	363408	360073	1.11034	1.09995	1.19899	1.00107	1.00936	0.987799	1.02511	0.993419	1.00926
C14537	107816	112389	107493	103431	112162	109905	114836	107388	113459	111970	109277	110624	110093	1.08439	0.981393	0.985262	1.04309	0.975431	1.03058	1.01705	0.99259	1.00482
C10597	329273	344634	364934	345926	303066	330026	387693	319677	340883	350915	343685	347300	341811	1.00933	0.82109	0.842198	1.13423	0.935246	0.997286	1.02664	1.00548	1.01606
C19659	986995	892966	318594	288492	389947	310353	267667	286467	283759	265085	506028	385557	681891	0.808636	0.747349	1.70921	0.392536	0.420106	0.416135	0.388749	0.742096	0.565423
C02730	304840	310326	279575	328831	381247	344389	379069	522051	361781	315826	387302	351564	300000	1.14605	1.45386	1.20375	1.26356	1.74017	1.20593	1.05275	1.291	1.17188
C20396	209941	202342	205092	202793	208492	199849	207857	201298	205070	205170	208580	206875	204846	0.99268	0.981068	1.01594	1.0147	0.982677	1.00109	1.00158	1.01823	1.0099
C12767	327668	315498	321185	330920	326145	333910	326746	312893	328074	334703	328699	331701	320141	1.02805	1.02268	1.01311	1.02063	0.977359	1.02478	1.04549	1.02673	1.03611
C10582	398188	429746	417260	406349	397316	447995	419346	377272	423245	411122	435588	423355	416628	1.03191	1.01449	0.941549	1.00652	0.905537	1.01588	0.986783	1.04551	1.01615
C01657	259131	227276	236242	282015	322543	282937	291566	288349	274456	269134	279189	274161	249407	1.151	1.19127	1.16279	1.16904	1.15614	1.10043	1.07909	1.11941	1.09925
C12436	243767	261035	247268	255040	243246	257503	261981	247815	264182	258881	255713	257297	250297	1.01926	0.956175	0.970737	1.04668	0.990084	1.05547	1.03429	1.02164	1.02797
C19174	378932	357565	363042	408420	349221	388935	430631	368584	385680	383432	425261	404347	372482	0.971177	0.920567	0.883272	1.15611	0.989534	1.03543	1.0294	1.1417	1.08555
C10949	173161	167163	169634	170692	168627	173775	172395	169051	169246	171254	168996	170125	171221	0.985595	0.990147	0.992124	1.00685	0.987328	0.988467	1.00019	0.987007	0.993601
C07908	624468	619249	587323	712373	643851	771328	748810	604073	515016	544026	567015	555520	750517	0.733354	0.753731	0.980744	0.997726	0.804877	0.686216	0.724869	0.755499	0.740184
C15892	224604	202712	194654	245291	270721	252671	241496	244075	241874	225817	233481	229649	210382	1.13541	1.26945	1.25236	1.14789	1.16015	1.14969	1.07336	1.10979	1.09158
C15230	36379	34487.5	34803.1	38378.4	45337.6	39725.4	41715.2	53848	42695.9	37164.6	45136	41150.3	35447.4	1.12999	1.49613	1.16104	1.17682	1.5191	1.20448	1.04844	1.27332	1.16088
C12039	314825	330727	328218	334521	318904	331258	307428	310954	318003	334279	326158	330218	324340	1.01006	0.942169	0.96485	0.947859	0.958728	0.980462	1.03064	1.00561	1.01812
C15935	882126	283643	295241	1.06634e+06	1.04127e+06	983971	1.01105e+06	1.03425e+06	1.07986e+06	971202	1.07047e+06	1.02084e+06	590292	1.55864	1.69618	1.59	1.71279	1.75211	1.82937	1.64529	1.81346	1.72938
C17938	125996	126021	125729	138650	137514	149883	133883	150691	131845	141816	136331	139073	125438	1.11914	1.26932	1.21718	1.06733	1.20132	1.05108	1.13056	1.08684	1.1087
C21551	849368	907656	815627	909090	834228	815332	837089	796897	836516	800896	831586	816241	853356	0.982062	0.936385	0.900778	0.980938	0.93384	0.980267	0.938526	0.974489	0.956508
C18241	395780	379389	383819	427738	358603	426096	401935	367259	393224	401706	410893	406300	392601	1.03139	0.961707	1.00126	1.02377	0.93545	1.00159	1.02319	1.04659	1.03489
C16915	446294	440586	454089	442417	434551	464077	448848	446882	465022	446873	444739	445806	447830	1.04714	0.993432	1.03233	1.00227	0.997883	1.03839	0.997863	0.993099	0.995481
C14744	304253	268659	308022	266309	270874	266049	265819	270332	261778	260107	271424	265765	290885	0.908208	0.89562	0.935411	0.913829	0.929343	0.899937	0.89419	0.933098	0.913644
C10526	264435	273622	290354	283219	287557	276478	284003	290225	275181	286756	284853	285804	276384	1.00109	1.03187	1.14105	1.02757	1.05008	0.995649	1.03753	1.03064	1.03408
C06948	78456.8	90480	85496.3	87179.6	80696.5	85915.6	88268.4	86398.8	96212.7	90120.9	87328.2	88724.6	83820.3	1.06173	1.0169	0.982794	1.05307	1.03076	1.14785	1.07517	1.04185	1.05851
C04534	198895	199211	197608	201208	207059	195637	221318	188285	210177	201756	191946	196851	198535	1.10472	1.03651	1.00107	1.11475	0.948372	1.05864	1.01622	0.96681	0.991517
C15612	1.09585e+06	1.10177e+06	1.10944e+06	1.12607e+06	1.06782e+06	1.10313e+06	1.08863e+06	1.06341e+06	1.08069e+06	1.08679e+06	1.10818e+06	1.09749e+06	1.09104e+06	1.01911	1.00091	0.976927	0.997791	0.974682	0.990516	0.996109	1.01572	1.00591
C07180	841776	338179	324921	854666	1.05088e+06	924886	961883	999033	885016	887000	990578	938789	567167	1.47115	1.80184	1.75719	1.69594	1.76144	1.56041	1.56391	1.74654	1.65522
C20554	520592	504277	496910	536266	556665	498323	492733	496114	537401	524631	517822	521226	513876	1.01332	1.0852	1.02358	0.958856	0.965436	1.04578	1.02093	1.00768	1.0143
C04796	302331	305532	303063	310608	309883	322831	317323	318841	318006	301489	301334	301412	304248	1.02352	1.03085	1.01697	1.04297	1.04796	1.04522	0.990931	0.990422	0.990677
C07267	174084	175178	179924	187463	163585	184592	176647	169469	178506	183782	187807	185794	177029	1.05091	1.00832	1.03319	0.997842	0.957296	1.00834	1.03814	1.06088	1.04951
C04546	331934	301589	275973	349414	358577	339158	363504	356870	378259	355327	367635	361481	310339	1.13928	1.14384	1.16532	1.17132	1.14994	1.21886	1.14497	1.18463	1.1648
C11831	389583	342787	315637	338647	356944	342259	343016	348896	334413	396411	434750	415580	361382	0.969684	0.928544	0.9554	0.949179	0.96545	0.925371	1.09693	1.20302	1.14997
C04166	531734	516531	509520	543940	468916	562639	552061	503336	565253	516996	515029	516012	516783	1.09774	0.945235	0.853512	1.06826	0.973979	1.09379	1.00041	0.996605	0.998508
C08968	426359	429412	423611	432957	436683	436025	450199	434260	439198	428414	442421	435418	425555	1.0263	0.99697	1.08243	1.05791	1.02046	1.03206	1.00672	1.03963	1.02318
C14543	560943	556633	591031	590474	664338	644325	631394	577682	625517	600747	635265	618006	567296	1.13053	1.09777	1.0771	1.11299	1.01831	1.10263	1.05897	1.11981	1.08939
C11329	536268	503027	514273	461688	561812	531203	434910	505597	438954	504475	492753	498614	522525	0.864895	1.08854	1.05987	0.832324	0.967604	0.840063	0.965456	0.943023	0.954239
C10654	227085	199169	207026	240085	282655	243043	255509	252690	237937	235851	232281	234066	218564	1.151	1.18048	1.16131	1.16904	1.15614	1.08864	1.07909	1.06276	1.07093
C00921	313234	325340	319706	324033	297270	320096	306344	293428	318531	313971	315592	314781	318046	0.99249	0.922672	0.931699	0.963208	0.922594	1.00152	0.987186	0.992284	0.989735
C11041	189632	157961	156927	207558	217484	203713	209055	204181	197279	194438	193448	193943	175811	1.17423	1.26187	1.22192	1.18909	1.16136	1.12211	1.10595	1.10032	1.10313
C22189	403654	416360	398351	378537	368703	397890	382978	369854	412422	398549	397009	397779	403258	0.959732	0.918252	0.847575	0.94971	0.917164	1.02272	0.988323	0.984504	0.986413
C14863	212969	209182	211392	220159	218350	224829	224485	223005	221094	221901	217053	219477	211279	1.06082	1.01731	1.03757	1.06251	1.0555	1.04646	1.05028	1.02733	1.0388
C11055	768989	747002	788426	863616	667976	802097	798385	727920	817464	765046	794215	779630	758593	1.0815	0.931247	0.840881	1.05245	0.959566	1.07761	1.00851	1.04696	1.02773
C09940	131326	56321.6	57190.8	163609	64186.9	164645	178081	63825.7	181508	152631	244025	198328	87975.7	1.55467	0.716587	0.74523	2.02421	0.725493	2.06315	1.73492	2.77378	2.25435
C07404	237581	238236	232853	230328	232094	242844	234662	235442	232866	230486	247812	239149	232813	1.04039	0.987676	0.991891	1.00794	1.01129	1.00023	0.990006	1.06443	1.02722
C18457	283897	301925	289775	305389	284156	302410	293252	283874	295635	305167	297754	301460	292751	0.996559	0.978134	0.996018	1.00171	0.969675	1.00985	1.04241	1.01709	1.02975
C02640	747646	763389	703926	780729	803004	776077	773864	794841	786073	767598	724361	745979	737140	1.1028	1.02872	1.05661	1.04982	1.07828	1.06638	1.04132	0.982664	1.01199
HMDB0001417	887450	835796	896276	967256	902297	938062	927442	887044	897342	905280	853311	879295	872074	1.06534	1.03045	1.10056	1.06349	1.01717	1.02898	1.03808	0.978485	1.00828
C05131	136572	140533	139397	142867	140353	148489	145956	144306	142658	135818	131071	133445	138206	1.0199	0.988271	1.02975	1.05608	1.04414	1.03222	0.982727	0.948376	0.965551
C17222	179802	185260	175497	190138	185703	186055	183551	187353	187186	189794	187292	188543	181755	1.06396	1.01798	1.04466	1.00988	1.0308	1.02988	1.04423	1.03046	1.03735
C01134	672212	677933	619172	689505	621867	672470	730682	649554	728370	661338	737576	699457	661473	1.00164	0.921433	0.989042	1.10463	0.981981	1.10113	0.999796	1.11505	1.05742
C00019	755813	795105	747744	785306	682076	770687	757153	673927	770270	739580	731875	735727	753408	0.997957	0.895147	0.897269	1.00497	0.894505	1.02238	0.981646	0.971419	0.976533
C15819	367798	356210	289231	386315	429140	419665	334824	380017	358233	354646	358640	356643	349678	1.18049	1.28947	1.28828	0.957521	1.08676	1.02447	1.01421	1.02563	1.01992
C07817	254681	249173	249138	312389	332781	298408	294470	311595	294929	265627	286416	276022	251048	1.1908	1.28207	1.19133	1.17296	1.24118	1.17479	1.05807	1.14088	1.09948
C05945	275862	272662	279313	278715	263845	273237	272015	260173	275716	271644	280421	276032	274608	1.01394	1.00456	0.994328	0.990557	0.947435	1.00403	0.989204	1.02117	1.00519
C12337	660589	639886	691340	694392	574423	687997	719740	623331	686935	685999	694832	690416	671185	1.08642	0.881663	0.887601	1.07234	0.928702	1.02347	1.02207	1.03523	1.02865
C10166	196475	172322	179120	207723	244554	210283	221067	218629	205865	204059	200971	202515	189102	1.151	1.18048	1.16131	1.16904	1.15614	1.08864	1.07909	1.06276	1.07093
C03930	442576	379881	395029	457233	534267	521586	500270	520896	492991	452873	509344	481108	410896	1.21592	1.32809	1.28928	1.21751	1.26771	1.1998	1.10216	1.23959	1.17088
C05293	227362	218390	221123	226005	233175	231693	226722	219693	228564	221606	225519	223563	221572	1.0093	1.0253	1.00089	1.02324	0.991517	1.03156	1.00015	1.01781	1.00898
C10985	458836	495210	473689	471189	468788	479237	482001	461262	467360	475630	465390	470510	472463	1.00409	0.981653	0.972036	1.02019	0.976292	0.9892	1.0067	0.985029	0.995866
C19092	200437	201338	191251	213271	206839	202202	200484	196193	200546	206793	202470	204631	195674	1.0478	1.03283	1.07877	1.02458	1.00265	1.0249	1.05682	1.03473	1.04577
C00878	283540	327414	299418	310305	333923	329697	306400	309506	302344	313756	304058	308907	303728	1.11891	1.10844	1.20825	1.0088	1.01902	0.995445	1.03302	1.00109	1.01705
C16147	224226	218257	225171	226869	222663	238278	226945	217366	234001	223882	225833	224857	222091	1.04654	0.964761	0.985	1.02185	0.978727	1.05363	1.00806	1.01685	1.01246
C11355	206549	202712	201120	221028	211713	214919	214150	222651	208721	202655	202029	202342	202125	1.09061	1.05322	1.05146	1.05949	1.10155	1.03264	1.00262	0.999524	1.00107
C18339	246583	195635	233174	193610	205053	196447	199563	194039	194331	196902	201718	199310	225787	0.866586	0.873465	0.912272	0.883857	0.859388	0.860682	0.872071	0.893401	0.882736
C10074	478609	423274	428440	434215	475858	470155	481331	445314	458150	452970	463810	458390	446929	1.00126	1.05794	1.0339	1.07697	0.996387	1.02511	1.01352	1.03777	1.02564
C18511	230954	227197	231228	233491	244867	226926	239452	249402	228964	227979	227142	227560	232926	1.01057	1.0032	1.05676	1.02802	1.07074	0.982992	0.97876	0.975167	0.976963
C08688	380442	388194	374614	360017	360259	388227	379164	359922	379557	362934	381195	372065	379021	1.03948	0.910665	0.897629	1.00038	0.949607	1.00141	0.957556	1.00574	0.981646
HMDB0010347	218302	217798	217112	223726	221483	232674	224525	227606	225266	216840	211625	214233	218241	1.01456	1.02154	1.07987	1.02879	1.04291	1.03219	0.993581	0.969684	0.981632
C10700	292685	867180	434778	281781	388067	317648	363384	369867	337670	329186	317428	323307	472496	0.679256	0.851733	0.770145	0.769074	0.782794	0.714651	0.696696	0.671811	0.684253
C18542	318840	323447	307464	296411	288324	287763	302035	292291	300663	306957	295256	301106	309807	0.999081	0.907525	0.907265	0.974915	0.943464	0.970486	0.990801	0.953033	0.971917
C02445	308121	315613	283045	288252	284304	285917	295957	293587	308159	295060	295978	295519	299965	0.973822	0.888363	0.944087	0.98664	0.978738	1.02732	0.983649	0.986709	0.985179
C09417	513418	503126	501519	530752	473617	516829	541073	489318	519936	539610	506433	523021	506036	1.04794	0.9219	0.992212	1.06924	0.966963	1.02747	1.06635	1.00078	1.03357
C04831	45321.8	30574.2	31469.2	69857.2	206511	51221.1	63784.9	50791.6	54614.3	48902.7	61598.5	55250.6	37210.6	1.36703	5.92998	6.55888	1.71416	1.36498	1.46771	1.31421	1.6554	1.48481
C02367	166339	145904	139050	187493	240947	198982	175969	199104	196171	171887	191605	181746	147698	1.26769	1.5889	1.51845	1.19141	1.34805	1.32819	1.16377	1.29727	1.23052
C10970	583181	595063	562805	613369	552242	598415	589021	581496	621131	601399	582795	592097	578143	1.04463	0.915171	0.90207	1.01882	1.0058	1.07436	1.04023	1.00805	1.02414
C02621	571935	563623	549993	568369	550624	586089	611387	586295	609013	584738	623404	604071	558844	1.02384	0.914865	1.00013	1.09402	1.04912	1.08977	1.04633	1.11552	1.08093
C08338	198539	196680	196875	205642	200839	210987	203597	206392	204270	196629	191548	194089	197841	1.01485	1.02184	1.08019	1.02909	1.04322	1.03249	0.993873	0.96819	0.981031
C15503	73875.5	74888.6	74723.6	76322	72025.2	67685.8	78638.7	79461.8	68856.6	68994.6	73337	71165.8	73554.8	0.99663	1.09097	1.01741	1.06912	1.08031	0.936127	0.938003	0.997038	0.96752
C06812	343979	345967	350102	341816	329291	345052	351158	340988	345743	335700	342893	339296	343436	1.07653	0.996394	0.988676	1.02249	0.992872	1.00672	0.977474	0.998419	0.987947
C03470	249226	253220	279564	300581	294368	270137	264981	275162	279056	263987	282385	273186	265093	1.0698	1.02047	1.01708	0.999577	1.03798	1.05267	0.995827	1.06523	1.03053
C15849	533841	587524	617297	571074	533494	577418	586648	527647	607037	543141	576778	559959	573816	1.06587	0.92624	0.939112	1.02236	0.919541	1.05789	0.946542	1.00516	0.975852
C01142	610361	589307	598502	610468	622644	637036	596724	603027	626302	596234	601799	599017	601057	0.98943	0.990288	1.02526	0.99279	1.00328	1.042	0.991976	1.00123	0.996605
C00624	338323	367483	337751	345032	361421	365487	350350	367856	346251	340077	365240	352659	344168	1.05847	1.06002	1.02638	1.01796	1.06883	1.00605	0.988115	1.06123	1.02467
C03576	514191	469119	358943	674246	692593	621051	617430	608569	664635	557291	556217	556754	456736	1.35173	1.42365	1.36514	1.35183	1.33243	1.45519	1.22016	1.21781	1.21899
C12110	204293	189044	184346	246809	305263	267494	247070	273369	256783	221291	253790	237540	197046	1.28703	1.48333	1.55263	1.25387	1.38734	1.30316	1.12304	1.28797	1.20551
C20314	114753	84127.8	107151	122795	170678	126528	136599	143927	134850	106025	134713	120369	104570	1.28939	1.48194	1.39941	1.3063	1.37637	1.28957	1.01391	1.28826	1.15109
C06953	491686	516521	512603	522447	498056	517352	501685	495267	496649	522069	509386	515727	506546	1.01006	0.967092	1.02158	0.990403	0.977733	0.980462	1.03064	1.00561	1.01812
C06748	118171	99664.9	104177	143209	195231	149668	156989	161507	152831	122971	141011	131991	109240	1.38613	1.71989	1.55407	1.4371	1.47846	1.39903	1.12569	1.29084	1.20826
C16838	81523.8	81415.2	81930.8	84297.6	82982.7	86815.2	80299.2	82461.2	86466.3	81876.9	82096.6	81986.7	82138.7	1.03942	1.03224	1.01288	0.977605	1.00393	1.05269	0.996813	0.999488	0.99815
C01880	570722	588470	554359	595103	617244	651406	602923	631653	556950	565442	608493	586968	584470	0.975173	1.01334	1.01868	1.03157	1.08073	0.952914	0.967444	1.0411	1.00427
C01041	608117	612471	611597	620489	639017	621903	642120	619386	626428	611048	631025	621036	608819	1.02318	0.999062	1.07914	1.0547	1.01736	1.02892	1.00366	1.03647	1.02007
C03210	222453	238437	245167	233196	230011	237771	246233	214598	237047	240996	246954	243975	233177	0.991409	0.954165	0.967286	1.05599	0.920326	1.0166	1.03354	1.05908	1.04631
C17007	277987	305130	304585	309312	332127	337392	321891	285031	315244	332096	307581	319838	291208	1.08339	1.17936	1.1179	1.10536	0.978788	1.08254	1.14041	1.05622	1.09831
C19114	166030	92283.1	282290	162389	182081	163995	165431	182286	174778	174556	162836	168696	175123	0.943574	1.01929	0.950047	0.944655	1.0409	0.998029	0.99676	0.929837	0.963299
C07184	182959	186163	185688	192614	178955	188250	203821	186086	187988	185197	193818	189507	185027	0.996322	0.958975	0.958153	1.10158	1.00572	1.016	1.00092	1.04751	1.02422
C19147	45094.8	37088.3	31161.7	51240.5	63300.9	47104	55202	52048.6	47675.4	40636.4	54459.9	47548.2	39282.9	1.13977	1.75417	1.40052	1.40524	1.32497	1.21364	1.03445	1.38635	1.2104
C02979	57973.2	54592.3	56624.6	53924.1	55892.7	56120.2	63690.5	59798.5	55546.1	56459	56126.5	56292.8	55484.8	1.02	1.05764	1.03249	1.14789	1.07775	1.0011	1.01756	1.01157	1.01456
C04015	229669	222431	224961	230769	244333	237384	232924	227882	243200	234305	228182	231243	225500	1.04883	1.10688	1.00745	1.03292	1.01056	1.0785	1.03905	1.0119	1.02547
C11712	229674	265527	247969	240555	217941	257318	240925	236262	250611	243460	244900	244180	243584	0.975645	0.903273	0.923095	0.989087	0.969942	1.02885	0.999493	1.0054	1.00245
C13688	165983	164410	150445	190482	193395	175318	198163	187702	182015	193705	184600	189153	165437	1.09524	1.14646	1.19168	1.19781	1.13458	1.1002	1.17087	1.11583	1.14335
C17619	409569	406701	405360	422433	417018	439743	410553	401027	429018	430969	436018	433494	409235	1.03296	1.00315	1.06159	1.00322	0.979944	1.04834	1.05311	1.06545	1.05928
C18749	166830	173885	172073	198376	268951	209367	235462	203732	185854	191117	232909	212013	170522	1.30781	1.28913	1.2192	1.38083	1.19476	1.08991	1.12078	1.36586	1.24332
C01964	116942	116966	116695	128687	127633	139113	124263	139863	122372	131626	126535	129080	116425	1.11914	1.26932	1.21718	1.06733	1.20132	1.05108	1.13056	1.08684	1.1087
C18445	495750	486786	468885	553763	529757	492409	477928	515242	493897	618351	630301	624326	486925	1.05144	1.03067	1.04953	0.981523	1.05816	1.01432	1.26991	1.29445	1.28218
C17575	124385	97257.2	96846.6	145606	194874	140482	140720	169441	151141	126579	156360	141469	106657	1.27422	1.79379	1.59373	1.31936	1.58865	1.41707	1.18678	1.46601	1.32639
C02683	436261	471893	475141	451678	553498	503760	456545	486802	473465	471505	459544	465524	461712	1.10582	1.27347	1.14122	0.98881	1.05434	1.02546	1.02121	0.995305	1.00826
C01796	149626	47765	54437.5	140995	138599	153439	162167	162144	123983	162132	139599	150865	105975	1.67047	1.74236	1.86627	1.53024	1.53002	1.16993	1.52991	1.31728	1.42359
C00086	574531	568699	578569	551124	564040	582528	563351	573479	610328	528555	544238	536396	564888	1.01716	0.985427	1.01876	0.99728	1.01521	1.08044	0.93568	0.963443	0.949562
C08673	235393	246658	243261	250992	242666	244436	240500	241307	240705	242895	245524	244210	242439	1.0203	1.00136	1.03997	0.992004	0.995331	0.992849	1.00188	1.01273	1.0073
C18781	93562.6	90731.5	88636.4	96650.3	100679	94139	81187.1	84501.3	89936.1	91390.2	73325.3	82357.7	91911.3	1.12868	0.930459	1.07818	0.88332	0.919379	0.97851	0.99433	0.797783	0.896057
C08592	101400	76009.3	74353.8	104972	120339	104969	106652	112135	105809	102138	117250	109694	84284.1	1.25331	1.40058	1.42329	1.26539	1.33044	1.25539	1.21183	1.39113	1.30148
C08325	189991	190855	194284	199261	188816	205593	195814	194243	201606	193172	192252	192712	191309	1.04208	1.02113	1.00875	1.02355	1.01534	1.05382	1.00973	1.00493	1.00733
C18651	156467	159173	161354	164731	163209	171878	168946	169754	169309	156236	148993	152615	159439	1.03986	1.02224	1.0332	1.05962	1.06469	1.0619	0.979908	0.934482	0.957195
C11593	146443	145441	149352	151070	155452	150366	158455	155733	150416	145427	142270	143848	146324	1.0165	1.06951	1.03775	1.0829	1.0643	1.02797	0.993866	0.972295	0.98308
C13244	221171	145104	118660	142908	140362	500556	143961	150595	154673	134241	142232	138236	155592	0.940982	3.69339	0.917199	0.925249	0.967885	0.994092	0.862776	0.914132	0.888454
C11066	451435	441311	447238	473302	510413	467310	450262	490165	451505	451604	450837	451220	444572	1.03696	1.12158	1.1347	1.0128	1.10256	1.0156	1.01582	1.01409	1.01496
C11299	504268	482172	493756	508429	505210	510507	498380	509164	514717	492818	493846	493332	491426	1.0453	1.09053	1.02409	1.01415	1.03609	1.0474	1.00283	1.00492	1.00388
C00584	547725	122337	123518	170381	204270	180284	167964	177537	223273	144862	219797	182330	230795	0.686089	0.802302	0.860558	0.727763	0.76924	0.967409	0.627668	0.95235	0.790009
C06734	329523	331162	318971	343985	295392	331777	345971	320094	350976	339775	337135	338455	325032	0.976809	0.862291	0.984278	1.06442	0.984805	1.07982	1.04536	1.03724	1.0413
C11710	390327	414834	407551	407257	390707	407548	405666	380859	389845	393683	404346	399014	402027	1.00001	0.964611	0.992593	1.00905	0.947346	0.969699	0.979244	1.00577	0.992506
C07756	182843	488280	219885	263656	244502	206473	336414	341531	290838	215426	245921	230674	271241	0.693539	1.25363	0.671598	1.24028	1.25914	1.07225	0.794225	0.90665	0.850438
C12391	84918.7	89648.8	83702.3	88669	83663.2	87922.6	85476.2	86633.4	87588.3	86766.5	88487.6	87627	86845.5	0.985666	1.02314	0.992773	0.984233	0.997559	1.00855	0.99909	1.01891	1.009
C14973	203939	215670	206814	213476	193198	216356	209700	204627	201245	207562	219691	213626	206739	1.0682	0.974261	0.96029	1.01432	0.989785	0.973427	1.00398	1.06265	1.03332
C08233	141662	144356	154198	155817	152789	160033	151806	155637	156068	153473	152269	152871	142950	1.01341	1.22977	1.21231	1.06195	1.08875	1.09177	1.07361	1.06519	1.0694
C18923	261049	254100	262150	264127	259230	277410	264214	253063	272429	260649	262920	261784	258564	1.04654	0.995718	1.00708	1.02185	0.978727	1.05363	1.00806	1.01685	1.01246
C05243	69149.5	73987.5	73082	77451.9	75471.2	80135.9	74616.4	82702.7	74391.1	79812.6	74884.2	77348.4	71069.2	1.13454	1.22957	1.17906	1.04991	1.16369	1.04674	1.12303	1.05368	1.08835
C18667	169786	172985	170974	169705	175738	180829	188556	177034	170931	167147	169387	168267	171276	1.01672	1.01885	1.01584	1.10089	1.03361	0.997984	0.975891	0.988972	0.982431
C16612	165658	169552	157030	171370	149543	169287	157708	155183	168459	165710	166905	166307	161370	1.03451	0.961739	0.971148	0.977305	0.961658	1.04393	1.02689	1.0343	1.03059
C15493	246680	257865	254381	257034	262231	261836	278272	260776	255230	257265	263390	260328	253094	1.03996	1.00664	0.999492	1.09948	1.03035	1.00844	1.01648	1.04068	1.02858
C09056	117934	119928	118186	127252	120749	121701	127020	126127	124305	119066	116529	117798	119033	1.01204	1.04455	0.989309	1.06709	1.05959	1.04428	1.00028	0.97896	0.989618
C17444	66459.3	53579.9	56874.1	65915.3	68983.3	70422.5	69856.2	70791.3	63339.9	63394.1	65543.1	64468.6	59331.8	1.05888	1.23071	1.30636	1.17738	1.19314	1.06755	1.06847	1.10469	1.08658
C18377	243953	68227.7	70036.5	290975	429162	344580	322377	365251	382788	262881	344904	303893	149867	1.84422	2.46761	2.42708	2.15109	2.43717	2.55419	1.7541	2.30141	2.02776
C05021	136687	107555	122548	152108	177698	169423	162548	156530	148012	135790	156872	146331	124254	1.18809	1.48344	1.36473	1.30819	1.25976	1.1912	1.09284	1.26251	1.17768
C11774	227406	239781	243991	241484	233331	242140	251139	223601	235857	235183	248624	241904	236200	0.986188	0.991414	1.03067	1.06325	0.946661	0.998547	0.995692	1.0526	1.02415
C17452	288167	294856	290795	298995	290892	298502	287494	278671	287739	285090	289384	287237	292253	1.00999	0.992998	0.995532	0.983718	0.953527	0.984556	0.97549	0.990184	0.982837
C02499	166191	151399	148614	202587	238725	211872	208837	209248	205345	180046	211839	195942	158675	1.22837	1.46817	1.49284	1.31613	1.31872	1.29412	1.13468	1.33505	1.23486
C18600	376788	386321	378361	395214	415297	396721	395185	411763	392835	399566	404237	401902	382903	1.10792	1.11368	1.11378	1.03208	1.07537	1.02594	1.04352	1.05572	1.04962
C08560	161625	167871	164964	167197	153388	165166	155893	151405	164358	157417	160026	158721	164108	0.99249	0.90168	0.914462	0.949945	0.922594	1.00152	0.959229	0.975128	0.967178
C10341	294948	314400	294332	324580	290166	324744	318351	263619	298324	295310	307355	301333	304724	1.0227	0.934935	0.903607	1.04472	0.865107	0.978996	0.969107	1.00863	0.988871
C01061	104578	275209	260498	190513	108330	181290	326353	210799	111660	356201	294276	325238	185281	0.747883	0.543274	0.577019	1.76139	1.13773	0.602654	1.92249	1.58827	1.75538
C22170	31051.1	29305.4	25473.5	30258.5	34878.4	32638.2	34216.5	35280	33479.4	28703	34326.1	31514.5	28752.9	1.08712	1.2381	1.19383	1.19002	1.22701	1.16439	0.998265	1.19383	1.09605
C02067	355866	346761	342439	381798	366312	391497	373699	388242	372228	362429	328887	345658	343807	1.03912	1.07864	1.12388	1.08695	1.12925	1.08267	1.05417	0.956604	1.00538
C08996	287986	298700	300781	297010	284626	290522	288760	288302	290916	294640	286455	290548	293514	1.02702	1.00868	0.982721	0.983803	0.982245	0.991152	1.00384	0.975952	0.989895
C10007	194999	194083	194564	191962	192265	190346	188737	187105	192147	187843	191569	189706	194142	0.988948	0.960556	0.957969	0.972157	0.963753	0.989725	0.967555	0.986748	0.977151
C04485	210175	205462	203491	220356	228466	217566	209629	217886	209527	207283	209897	208590	205798	1.01356	1.12802	1.13419	1.01862	1.05874	1.01812	1.00722	1.01992	1.01357
C14841	207493	204246	199971	204908	223098	210474	211617	214865	207244	214799	211106	212953	204977	1.03103	1.05385	1.06974	1.03239	1.04824	1.01106	1.04792	1.0299	1.03891
C15719	322941	343217	337192	336948	323256	337189	335633	315108	322543	325718	334540	330129	332621	1.00001	0.964611	0.992593	1.00905	0.947346	0.969699	0.979244	1.00577	0.992506
C01143	141556	166013	277333	142053	147083	150515	146573	143546	157301	148155	153020	150587	180548	0.833371	0.862616	0.824794	0.811825	0.795057	0.871242	0.820583	0.84753	0.834056
C10730	245580	255906	253773	256731	267404	253938	265093	260029	257440	246524	259062	252793	251622	0.996376	1.00303	1.00801	1.05354	1.03341	1.02312	0.979738	1.02957	1.00465
C08579	299078	305577	306938	309005	298985	308872	304057	289821	294796	296748	303561	300154	300927	0.968118	0.944107	0.987354	1.0104	0.963096	0.979628	0.986113	1.00875	0.997433
C15346	191749	193605	192375	200528	196825	197783	206471	195611	200511	189692	201774	195733	191439	0.996951	1.02681	1.01689	1.07852	1.02179	1.04738	0.990873	1.05398	1.02243
C14077	275678	293184	283575	280087	275930	293655	284762	274235	287077	296333	277944	287138	284824	0.994644	0.976254	0.994104	0.999786	0.962826	1.00791	1.04041	0.975845	1.00813
C07905	216984	217046	219267	223686	207123	220731	236956	214290	223012	217646	211118	214382	218732	1.06173	0.934037	0.982139	1.08332	0.979693	1.01957	0.995034	0.965191	0.980112
C07454	146640	50428.2	56577	181278	252385	193282	185828	199583	219458	158867	193306	176087	95361.9	1.95277	2.48498	2.10903	1.94866	2.0929	2.30132	1.66594	2.02708	1.84651
HMDB0000349	55451.2	48656	48343.4	58060.3	63291.6	57882.5	60768.5	59886.4	56829.8	53599.3	58008.6	55803.9	51870.7	1.09105	1.31782	1.18095	1.17154	1.15453	1.0956	1.03332	1.11833	1.07583
C12390	246564	258626	260099	254253	233666	249230	241051	232446	253428	251032	252688	251860	250565	0.996884	0.959599	0.967257	0.96203	0.927688	1.01142	1.00186	1.00847	1.00517
C18573	278545	289310	291218	288148	264349	282833	272418	270773	273671	286888	284204	285546	284554	0.965078	0.918119	0.90922	0.957354	0.95157	0.961754	1.0082	0.998771	1.00349
C05230	271235	271047	283388	278946	256693	263955	273950	256923	267800	272922	274379	273650	271595	1.00497	0.885836	0.948454	1.00867	0.945977	0.986026	1.00489	1.01025	1.00757
C19990	243868	242723	243325	240070	240449	238049	236036	234558	240301	234919	239579	237249	242796	0.988948	0.990844	0.961437	0.972157	0.966071	0.989725	0.967555	0.986748	0.977151
C11086	159423	149788	157992	190162	212967	183970	173052	179010	196992	171471	174639	173055	156347	1.20915	1.31195	1.28271	1.10684	1.14496	1.25997	1.09673	1.11699	1.10686
C11268	214454	226259	220375	234889	239355	226241	219446	242767	219092	221170	211752	216461	219645	1.05442	1.12687	1.12803	0.999091	1.10527	0.99748	1.00694	0.964062	0.985502
C01235	215824	214367	206689	221776	206655	212958	214401	199661	212838	212249	218253	215251	211142	1.01436	0.967528	0.994204	1.01544	0.945627	1.00803	1.00524	1.03368	1.01946
C06539	239410	237118	250138	231725	226575	230825	241807	226778	236378	240900	236622	238761	236858	1.00275	0.954812	0.956339	1.0209	0.957442	0.997976	1.01706	0.999003	1.00803
C18921	218818	226618	225338	242700	234631	236010	237068	230534	243143	229871	213210	221540	222232	1.08598	1.12868	1.08099	1.06676	1.03736	1.0941	1.03437	0.959404	0.996889
C18663	220192	226203	230778	230807	217151	222816	227912	223312	233648	227533	220659	224096	222519	1.01587	0.944917	0.97569	1.02423	1.00356	1.05001	1.02253	0.991638	1.00708
C07805	205477	190675	187702	210114	208914	217195	214736	205383	206914	209605	193782	201693	196200	1.0868	1.06047	1.05826	1.09448	1.0468	1.05461	1.06832	0.987674	1.028
C00459	189857	192130	194847	196159	188576	196074	189082	183981	187139	181998	177321	179659	190568	0.970471	0.945975	0.989754	0.992204	0.965436	0.982009	0.955028	0.930488	0.942758
C07569	47257.7	39717.7	39548.5	48876.5	56836.1	57144	47204.8	47848.7	46962.4	50055.5	49742.3	49898.9	41352.2	1.0969	1.25303	1.26856	1.14153	1.1571	1.13567	1.21047	1.20289	1.20668
C11646	28846.6	21736.6	17112.1	34168.7	41335.4	33924.8	25998.5	28323.2	24628.3	26207.4	28150	27178.7	23549.2	1.84059	1.79705	2.09907	1.10401	1.20272	1.04582	1.11288	1.19537	1.15412
C06817	58291.4	60642.9	62337.8	58660	58989.7	55619	57006.9	55194.5	59535	60284.7	57890.9	59087.8	59493.1	1.05012	1.03138	0.994779	0.958211	0.927747	1.0007	1.01331	0.973069	0.993188
C00003	1.40309e+08	2.99647e+06	2.96819e+06	1.80612e+08	6.63158e+06	1.92948e+08	2.0186e+08	3.80659e+06	1.94461e+08	1.32235e+08	2.13952e+08	1.73093e+08	7.51182e+07	2.54931	0.0543195	0.0527521	2.68723	0.0506747	2.58873	1.76035	2.8482	2.30428
C00004	9.97712e+07	4.74602e+06	4.90852e+06	1.36398e+08	5.06864e+07	1.35669e+08	1.40542e+08	4.84416e+07	1.42841e+08	5.16401e+07	1.51893e+08	1.01767e+08	5.48696e+07	2.41005	0.932767	0.926405	2.56138	0.88285	2.60328	0.941142	2.76826	1.8547
C00005	1.58569e+06	1.62078e+06	1.57891e+06	1.63664e+06	1.75375e+06	1.71642e+06	1.69328e+06	1.73272e+06	1.62252e+06	1.63222e+06	1.592e+06	1.61211e+06	1.59425e+06	1.01505	1.08911	1.07402	1.06212	1.08686	1.01773	1.02382	0.998589	1.0112
C00008	1.35973e+07	616660	600648	4.42423e+07	681676	3.98764e+07	4.0048e+07	671702	4.86435e+07	2.82111e+07	6.35139e+07	4.58625e+07	7.3207e+06	6.11679	0.0888636	0.0913392	5.47051	0.0917538	6.64465	3.8536	8.67593	6.26477
C00022	840893	720581	607748	894085	2.70881e+06	1.90384e+06	1.27979e+06	7.27765e+06	762378	778720	937621	858170	750792	3.88328	3.83783	5.18297	1.70459	9.6933	1.01543	1.0372	1.24884	1.14302
C00025	852700	855582	839172	885922	1.00923e+06	881760	928748	928120	947457	896780	920131	908456	848609	1.09497	1.10716	1.0948	1.09444	1.0937	1.11648	1.05677	1.08428	1.07052
C00026	3.10895e+07	3.77924e+07	3.17469e+07	4.11942e+07	4.22921e+07	3.78567e+07	3.45035e+07	2.77466e+07	3.76246e+07	4.65346e+07	3.23768e+07	3.94557e+07	3.21354e+07	1.18334	1.17131	1.11002	1.07369	0.863427	1.17082	1.44808	1.00751	1.2278
C00031	328966	291769	245839	362022	385664	356130	295253	334536	307791	312513	328680	320597	298704	1.16182	1.28432	1.28314	0.988445	1.11996	1.03042	1.04623	1.10035	1.07329
C00036	1.0866e+06	1.20011e+06	1.20332e+06	1.24151e+06	1.22556e+06	1.27906e+06	1.24056e+06	1.31177e+06	1.18098e+06	1.24102e+06	1.24162e+06	1.24132e+06	1.14356e+06	1.12119	1.18818	1.13937	1.08483	1.1471	1.03273	1.08522	1.08576	1.08549
C00042	161240	175527	179366	170464	167999	190850	170491	160740	153859	165312	171344	168328	169242	1.10086	1.11254	1.23666	1.00738	0.949767	0.909107	0.976782	1.01242	0.994602
C00074	2.12105e+06	3.19547e+06	3.52604e+06	2.79771e+06	4.75141e+06	2.74127e+06	1.99403e+07	3.0674e+06	1.49972e+07	1.27855e+07	1.14082e+07	1.20969e+07	2.68452e+06	6.90951	1.04649	0.869006	7.42789	1.14262	5.58653	4.76268	4.24964	4.50616
C00108	169503	141007	136940	179453	252473	206554	207141	210000	207491	185877	195790	190833	153167	1.29951	1.63993	1.50054	1.35239	1.37106	1.35467	1.21356	1.27828	1.24592
C00111	228485	231775	228309	242009	238099	231487	242294	242763	236477	228923	230570	229747	227384	1.04449	1.05461	1.0668	1.06557	1.06763	1.03999	1.00677	1.01401	1.01039
C00122	5.50597e+06	2.16064e+06	2.1527e+06	1.01736e+07	5.315e+06	9.91233e+06	1.51317e+07	3.0268e+06	1.45031e+07	1.10714e+07	1.75156e+07	1.42935e+07	3.63879e+06	3.28027	1.55442	0.367309	4.15844	0.831815	3.98569	3.04261	4.81357	3.92809
C00125	1.71714e+06	521762	523208	1.77954e+06	1.54863e+06	1.93527e+06	1.92975e+06	1.69515e+06	1.58399e+06	1.68266e+06	1.67272e+06	1.67769e+06	1.13426e+06	1.67711	1.95555	1.80131	1.70132	1.4945	1.39649	1.48348	1.47472	1.4791
C00149	1.80162e+06	1.79403e+06	1.78105e+06	1.88696e+06	2.01536e+06	1.86635e+06	1.81671e+06	1.95024e+06	1.80066e+06	1.83366e+06	1.85323e+06	1.84345e+06	1.79526e+06	1.03635	1.10757	1.1095	1.01195	1.08633	1.00301	1.02139	1.03229	1.02684
C00158	1.24969e+06	1.2855e+06	1.26056e+06	1.41618e+06	1.3653e+06	1.40936e+06	1.34985e+06	1.38853e+06	1.38032e+06	1.35571e+06	1.34211e+06	1.34891e+06	1.2768e+06	1.10897	1.04282	1.11426	1.05721	1.08751	1.08108	1.0618	1.05115	1.05648
C00166	388231	380939	377874	429085	432789	421565	407271	387746	409488	373722	406237	389980	383382	1.07817	1.0716	1.07737	1.06231	1.01138	1.06809	0.974802	1.05961	1.01721
C00197	6.72605e+08	2.90537e+06	2.91201e+06	9.44124e+08	2.00998e+09	9.7219e+08	1.32363e+09	3.52267e+08	1.17759e+09	9.8445e+08	1.39086e+09	1.18765e+09	3.41663e+08	2.83954	5.872	4.54079	3.87406	1.03104	3.44665	2.88135	4.07084	3.47609
C00236	267135	257612	254928	298931	398453	310179	263764	284432	283293	298765	288254	293510	260150	1.27001	1.25186	1.22121	1.01389	1.09334	1.08896	1.14843	1.10803	1.12823
C00251	5.61708e+06	1.6028e+06	1.59662e+06	5.49347e+06	6.46087e+06	5.35854e+06	6.16795e+06	7.49147e+06	6.46524e+06	6.77122e+06	6.25435e+06	6.51278e+06	3.65009e+06	1.4797	1.79456	1.69842	1.68981	2.0524	1.77125	1.85508	1.71348	1.78428
C00311	1.11057e+06	1.22658e+06	1.22986e+06	1.2689e+06	1.2526e+06	1.30727e+06	1.26793e+06	1.34071e+06	1.20703e+06	1.26839e+06	1.26901e+06	1.2687e+06	1.16878e+06	1.12119	1.18818	1.13937	1.08483	1.1471	1.03273	1.08522	1.08576	1.08549
C00390	632123	596479	605616	681315	582561	648810	718366	614861	984921	639630	709409	674519	621364	1.03863	0.920567	0.883272	1.15611	0.989534	1.58509	1.0294	1.1417	1.08555
C00399	404779	384339	393518	623417	375762	418656	416330	382813	1.06768e+06	441295	596874	519084	394896	1.39472	0.973993	1.04782	1.05428	0.969401	2.70369	1.1175	1.51147	1.31448
C00668	1.48293e+06	1.4374e+06	1.47735e+06	1.47487e+06	1.44005e+06	1.51485e+06	1.44941e+06	1.51817e+06	1.45868e+06	1.4616e+06	1.52639e+06	1.494e+06	1.46672e+06	1.02929	1.04894	1.08903	0.988198	1.03508	0.994523	0.996514	1.04069	1.0186
C00828	574915	566964	553651	606191	672643	646003	622379	671539	561419	553229	587604	570417	567214	1.11962	1.19214	1.10505	1.09726	1.18393	0.989783	0.975345	1.03595	1.00565
C01068	1.84729e+06	1.79058e+06	1.84357e+06	1.92905e+06	1.79387e+06	1.90891e+06	1.80553e+06	1.89119e+06	1.81708e+06	1.8904e+06	1.90143e+06	1.89591e+06	1.8279e+06	1.02883	1.04848	1.08855	0.987761	1.03462	0.994083	1.03419	1.04023	1.03721
C01179	328966	291769	245839	362022	385664	356130	295253	334536	307791	312513	328680	320597	298704	1.16182	1.28432	1.28314	0.988445	1.11996	1.03042	1.04623	1.10035	1.07329
C01708	677610	811692	781393	746957	674670	781441	694078	645518	726598	663879	708205	686042	729147	1.06417	1.03703	1.15273	0.951903	0.885305	0.996503	0.910487	0.971278	0.940882
C02341	3.08623e+07	3.36199e+07	7.19817e+07	1.42578e+08	1.46641e+08	1.41209e+08	1.45613e+08	3.99052e+07	3.89575e+07	4.13297e+07	4.4026e+07	4.26778e+07	4.20584e+07	3.36621	3.30859	1.19032	3.46216	0.948804	0.926271	0.982673	1.04678	1.01473
C03196	93403.6	93187.7	92894.3	95244.5	93536.6	98309.4	94960.5	95169	96383.3	88961.8	90546.7	89754.2	92775.2	1.00896	1.0186	0.987255	1.02355	1.0258	1.03889	0.958896	0.975979	0.967437
C03506	515595	499351	405456	596485	601587	588305	469371	532725	508617	508160	541549	524854	490194	1.22391	1.28947	1.28828	0.957521	1.08676	1.03758	1.03665	1.10476	1.07071
C04302	86531.1	72268.8	72267.5	100189	86593.9	102106	112687	92161.9	111572	92438.2	114972	103705	79500.2	1.10732	1.08993	1.08412	1.41745	1.15927	1.40341	1.16274	1.44619	1.30446
C05382	444752	496414	464031	542154	504587	575808	495512	616295	511818	518059	534592	526325	463232	1.20622	1.29687	1.34763	1.06968	1.33042	1.10488	1.11836	1.15405	1.1362
C12215	1.4526e+06	1.46052e+06	1.47797e+06	1.51908e+06	1.44023e+06	1.54123e+06	1.51077e+06	1.45614e+06	1.51356e+06	1.45449e+06	1.46073e+06	1.45761e+06	1.46423e+06	1.06595	1.00015	1.02766	1.03179	0.994478	1.03369	0.993348	0.997612	0.99548
C15602	1.80976e+07	2.79263e+06	2.78513e+06	2.48494e+07	2.4691e+06	2.44904e+07	2.68974e+07	2.51114e+06	2.76807e+07	2.45411e+07	2.74993e+07	2.60202e+07	1.06929e+07	2.0651	0.25537	0.2328	2.51543	0.234842	2.58869	2.29507	2.57172	2.4334
C15603	860938	750728	714349	983097	1.22539e+06	1.03891e+06	993608	1.03548e+06	1.04362e+06	840650	991375	916013	782759	1.2766	1.53141	1.48477	1.26937	1.32286	1.33326	1.07396	1.26651	1.17024
C00354	909733	719589	667510	1.18776e+06	1.61348e+06	1.15807e+06	968028	1.28279e+06	990062	946645	1.12063e+06	1.03364e+06	796845	5.03918	1.81954	6.0682	1.21482	1.60983	1.24248	1.18799	1.40634	1.29716
C05345	1.48293e+06	1.4374e+06	1.47735e+06	1.47487e+06	1.44005e+06	1.51485e+06	1.44941e+06	1.51817e+06	1.45868e+06	1.4616e+06	1.52639e+06	1.494e+06	1.46672e+06	1.02929	1.04894	1.08903	0.988198	1.03508	0.994523	0.996514	1.04069	1.0186
C05819	454365	410602	442613	467126	463990	484633	469274	489505	475610	494209	490335	492272	434274	1.11308	1.09964	1.10516	1.08059	1.12718	1.09518	1.13801	1.12909	1.13355

## Sheet: nomalize data-graph was made 
Sample	CD8+1	CD8+2	CD8+3	CD8+ I1	CD8+ I2	CD8+ I3	CD8+ I6	CD8+ I+D1	CD8+ I+D2	CD8+ U+D1	CD8+ U+D2	CD8+ U+D3
Label	UNINFECTED	UNINFECTED	UNINFECTED	INFECTED	INFECTED	INFECTED	INFECTED	INFECTED+D	INFECTED+D	UNINFECTED+D	UNINFECTED+D	UNINFECTED+D
C00062	1	1	1	1.02528	2.66447	0.995408	1.05624	0.930301	0.893729	0.902971	0.926245	0.914608
C00079	1	1	1	1.05018	1.06766	1.03494	1.0877	1.07132	0.958794	1.05741	1.02336	1.04038
C00431	1	1	1	1.013	0.981168	1.0582	1.06722	0.923965	5.25174	0.921655	0.975837	0.948746
C06044	1	1	1	2.72538	2.32836	0.445044	2.43582	2.54412	0.263411	2.31146	16.444	9.37775
C21283	1	1	1	0.974722	1.04621	0.862469	0.998612	0.889703	0.852198	0.952464	0.864678	0.908571
C09106	1	1	1	0.255382	0.747974	0.279496	0.520186	0.446828	2.12241	0.159719	0.113515	0.136617
C00463	1	1	1	0.303514	3.6234	3.31649	3.7035	4.37695	0.345883	3.3815	4.28229	3.8319
C00588	1	1	1	1.47983	1.44473	1.76947	1.60142	1.71272	1.7298	1.53582	1.71516	1.62549
C15846	1	1	1	2.3722	2.01885	0.0125117	2.27842	2.52967	0.0123774	2.56249	2.6035	2.58299
C00666	1	1	1	0.988049	2.44695	0.110886	1.61917	0.577797	0.113188	3.17525	2.57775	2.8765
C00037	1	1	1	1.36857	1.58805	1.67059	1.33435	1.11538	1.47805	1.09074	1.29121	1.19098
C16396	1	1	1	2.18226	1.55048	1.24477	1.17903	1.18394	1.18606	1.08628	1.18248	1.13438
C00009	1	1	1	1.05231	1.13665	1.44779	1.05166	0.910499	1.1538	0.909837	0.961614	0.935726
C09469	1	1	1	1.2282	1.37082	0.682132	1.6731	5.17589	0.62923	0.997391	1.51631	1.25685
C00064	1	1	1	1.14907	5.69579	1.46624	1.19231	1.2463	1.48874	1.14843	1.24788	1.19816
C07073	1	1	1	1.04234	0.997957	0.895147	1.02293	1.00497	0.894505	0.981646	0.971419	0.976533
C00106	1	1	1	0.950865	1.02436	0.962517	1.00984	0.862777	0.900068	0.867295	0.911302	0.889298
C01530	1	1	1	1.02697	0.982569	1.1315	0.987464	1.05849	1.04585	0.947411	0.91837	0.93289
C01207	1	1	1	1.12393	1.19833	1.31372	1.18708	1.01972	1.1554	1.04927	1.10065	1.07496
C03033	1	1	1	0.987365	0.993148	1.0778	0.978706	1.04495	1.04046	1.03334	0.992547	1.01294
C02413	1	1	1	0.263792	1.99772	0.251538	2.01363	1.86897	0.275899	0.250139	1.52286	0.886501
C03232	1	1	1	0.991491	0.981856	0.993241	0.971532	1.01684	0.999903	1.00352	0.980119	0.991819
C12570	1	1	1	2.22948	1.5884	0.0999175	0.542476	0.133168	0.108798	0.121818	0.0778166	0.0998173
C02724	1	1	1	1.20779	1.15897	1.14706	1.12333	1.00878	1.05453	1.02301	1.06947	1.04624
C03299	1	1	1	1.05609	1.01651	1.26469	0.9982	1.01874	0.965031	0.973443	0.951315	0.962379
C00078	1	1	1	1.1024	1.09817	1.08376	1.13922	1.05322	1.12238	1.09585	1.06831	1.08208
C15486	1	1	1	0.977463	0.996514	0.883867	0.999916	0.864672	0.81437	0.924339	0.865806	0.895073
C07550	1	1	1	1.0961	1.14605	1.45386	1.14796	1.26356	1.74017	1.05275	1.291	1.17188
C01678	1	1	1	0.987723	0.973673	9.06373	0.98566	5.00189	5.58141	1.20464	0.971028	1.08783
C12986	1	1	1	1.05209	1.06358	1.05768	1.04621	1.04557	1.03153	1.01301	1.00787	1.01044
C17362	1	1	1	1.06784	1.27813	6.24987	1.10532	1.41218	1.49827	1.03407	1.25587	1.14497
C06475	1	1	1	0.987365	0.992649	1.13486	0.983675	0.968952	1.04046	1.06395	0.963874	1.01391
C18390	1	1	1	1.11965	1.14039	1.02645	1.08008	1.17739	1.05554	1.0571	1.1164	1.08675
C12448	1	1	1	1.258	1.29523	1.66987	1.38078	1.30668	1.42388	1.19991	1.31842	1.25916
C08278	1	1	1	1.04926	1.03434	0.949642	1.04707	0.991206	0.959437	1.00713	1.0279	1.01751
C14430	1	1	1	7.2645	2.05567	0.770526	2.79709	2.86266	14.6896	1.23418	0.629209	0.931692
C06804	1	1	1	1.12621	0.999144	1.06081	1.0574	1.02721	10.4618	1.07679	1.21395	1.14537
C00118	1	1	1	3.38789	0.449363	0.387926	0.419575	0.870666	0.348301	3.89817	3.53059	3.71438
C04446	1	1	1	1.01288	1.07417	1.03917	1.03479	1.02958	1.01981	0.989795	0.943923	0.966859
C00082	1	1	1	1.03641	1.04231	0.952178	0.998277	1.12806	0.928023	1.00377	1.09847	1.05112
C04070	1	1	1	0.996048	1.01116	0.986746	0.958554	0.982178	1.01312	1.00072	0.961572	0.981146
C13877	1	1	1	1.02846	1.00474	1.03562	1.00398	1.03131	1.0539	1.0413	1.03439	1.03785
C01252	1	1	1	1.05058	0.95516	0.979108	1.0649	1.10537	1.02722	1.14267	1.08088	1.11177
C03183	1	1	1	1.08269	1.12999	1.49613	1.12068	1.27171	1.69002	1.04844	1.27332	1.16088
C00093	1	1	1	1.01491	1.00862	1.08468	1.04947	1.03853	1.01025	1.10103	1.17748	1.13926
C04421	1	1	1	1.35315	1.03689	1.05327	1.09759	0.924079	3.26525	0.991579	0.977103	0.984341
C02937	1	1	1	1.69743	1.80546	1.76079	1.72711	1.77197	1.57448	1.68462	1.75826	1.72144
C01451	1	1	1	1.07074	1.04292	1.12802	1.02322	1.01862	1.10889	1.01893	1.01992	1.01943
C07182	1	1	1	5.84506	5.05822	16.5326	4.81875	4.4094	10.2434	4.50879	5.70839	5.10859
C01591	1	1	1	0.0913088	0.0588911	0.0613604	2.46403	0.0845903	0.0687098	1.85433	0.109481	0.981905
C10831	1	1	1	3.76914	2.35109	2.38637	3.79075	4.33107	2.2126	2.20095	3.85154	3.02625
C09916	1	1	1	14.4823	3.63806	0.212211	7.72232	5.46738	0.188328	15.7763	6.22553	11.0009
C05332	1	1	1	0.872646	0.879853	0.866801	0.930315	0.958104	0.934579	0.920601	0.923746	0.922173
C17944	1	1	1	1.82371	6.54405	0.000954347	1.71758	2.17986	0.000926049	1.18167	9.25399	5.21783
C10387	1	1	1	1.0961	1.14605	1.45386	1.14796	1.18613	1.74017	1.05275	1.291	1.17188
C10840	1	1	1	1.88019	1.31026	2.2463	1.3795	1.92665	1.78334	2.81279	2.31729	2.56504
C04483	1	1	1	3.06635	2.99562	0.000343231	2.88542	3.35406	0.000115995	3.12327	3.73141	3.42734
C20651	1	1	1	0.744223	0.745919	0.849648	0.755709	0.711325	0.919394	0.7573	0.665941	0.711621
C00114	1	1	1	0.535661	3.24724	0.576727	0.483968	0.591331	55.0311	1.19666	0.718969	0.957814
C16562	1	1	1	2.77201	43.712	0.0271514	2.66976	51.9507	0.0213969	2.64347	2.9945	2.81899
C01746	1	1	1	0.965742	2.64943	0.943465	1.03158	0.98345	9.48206	0.985256	1.00775	0.996505
C16521	1	1	1	1.01721	2.98678	0.991125	1.0532	1.02869	12.9219	1.00591	1.02888	1.01739
C00695	1	1	1	9.75828	14.2736	0.499531	7.43015	16.0546	0.249391	4.05017	11.611	7.83061
C01205	1	1	1	7.39864	7.06076	11.2564	7.80256	6.1517	6.48122	4.9224	8.52256	6.72248
C00341	1	1	1	1.0429	1.08518	1.05794	1.06696	0.92374	0.90889	0.923069	0.975599	0.949334
C00928	1	1	1	0.964698	1.02507	0.937501	1.03046	0.982387	0.931909	0.984191	0.995721	0.989956
C08617	1	1	1	2.80546	2.68633	1.61624	2.71462	2.99819	1.62184	2.84794	3.48681	3.16737
C06771	1	1	1	1.01898	1.0192	0.983924	1.04975	1.02122	2.14739	0.98966	1.01519	1.00243
C02735	1	1	1	1.08746	14.986	1.0582	1.06722	0.923965	49.6843	0.921655	0.975837	0.948746
C00396	1	1	1	0.860968	0.762983	0.593161	0.439723	0.668341	0.592968	0.388119	0.540889	0.464504
C12531	1	1	1	4.84779	0.555563	14.6149	4.71959	6.34487	9.2699	4.69284	7.14554	5.91919
C08671	1	1	1	3.02336	1.80514	1.89809	2.97043	1.50431	2.14215	1.71385	3.32905	2.52145
C09281	1	1	1	1.67357	1.72359	0.926954	1.12979	1.01073	1.04255	0.597735	0.793649	0.695692
C09098	1	1	1	0.606079	1.00671	1.00282	1.01042	1.06069	1.05224	0.995941	0.982314	0.989128
C01770	1	1	1	3.83816	4.15294	14.3426	3.72135	3.92867	6.61676	3.19823	4.40134	3.79979
C02486	1	1	1	1.06068	1.62375	1.05107	1.06003	0.921081	5.27304	0.915447	0.969264	0.942356
C06575	1	1	1	0.931753	0.886576	0.710999	1.06446	0.76903	0.928053	0.172508	0.81612	0.494314
C11721	1	1	1	1.03803	0.997202	0.91769	1.17538	0.981889	0.953068	1.22569	1.48873	1.35721
C00407	1	1	1	1.20038	14.7973	1.27203	1.18392	0.967732	20.4822	1.03622	1.08982	1.06302
C02223	1	1	1	0.0560157	0.0564724	0.0564992	0.052091	0.0531953	0.0581456	0.0552899	0.0544262	0.054858
C00366	1	1	1	1.0577	1.03206	1.02999	1.04465	1.0257	1.04818	1.03564	1.02877	1.03221
C14279	1	1	1	0.251618	4.05946	0.055614	0.323521	0.205687	0.196903	0.332478	0.21775	0.275114
C00601	1	1	1	0.458578	2.01418	0.731368	2.12017	2.35221	0.300511	1.90154	2.36805	2.13479
C03840	1	1	1	0.857215	0.871658	0.418725	0.877966	0.713799	0.526095	0.80161	0.727334	0.764472
C00922	1	1	1	0.727675	2.31204	1.00732	0.968208	0.963107	1.06717	1.19314	1.01915	1.10614
C01993	1	1	1	24.7277	131.782	6.64048	0.897559	0.797214	0.741439	0.762528	0.813441	0.787984
C11318	1	1	1	6.87633	2.14181	217.473	1.4052	13.0465	61.09	0.987095	7.81282	4.39996
C05464	1	1	1	1.05643	1.07335	1.00708	1.0808	1.0831	0.983303	1.02715	1.05015	1.03865
C14774	1	1	1	2.28246	2.1764	1.52549	2.28729	1.26016	1.81339	2.14118	2.45854	2.29986
C02787	1	1	1	0.848338	0.862315	0.788461	0.879046	0.940088	0.916672	0.906164	0.878802	0.892483
C10820	1	1	1	2.19727	2.19671	0.0851091	2.27692	2.41895	1.88231	2.2294	2.28651	2.25796
C00810	1	1	1	2.12917	2.25118	2.51492	2.32303	2.03929	2.27542	1.95023	2.15335	2.05179
C08175	1	1	1	4.01968	3.10393	6.81514	3.53803	4.89327	4.78018	2.83221	1.05417	1.94319
C11714	1	1	1	11.892	13.4354	46.4613	12.2159	11.8965	15.1551	7.08449	13.7854	10.4349
C00148	1	1	1	1.90315	1.02408	1.58001	3.01128	1.00347	4.10707	1.14349	0.894159	1.01883
C03943	1	1	1	1.46328	1.34575	1.07133	0.907967	0.916256	5.91598	1.69958	0.813278	1.25643
C20517	1	1	1	6.28728	6.21332	10.1752	6.30227	3.32283	8.35383	3.03834	8.3	5.66917
C04033	1	1	1	1.19495	1.21115	1.63898	1.14003	1.10912	1.43053	1.26144	1.29703	1.27924
C10736	1	1	1	1.05397	1.0332	1.00851	0.30387	1.01578	1.05294	1.12136	1.13223	1.1268
C10462	1	1	1	1.39956	1.48626	2.09207	1.4549	1.63835	0.718483	1.42398	0.644748	1.03437
C19266	1	1	1	2.24927	2.61611	4.0611	2.5255	2.79694	3.28471	2.1816	3.30716	2.74438
C02366	1	1	1	7.7249	2.07402	13.5538	1.77931	8.68901	11.1282	4.9055	9.99371	7.4496
C17005	1	1	1	2.57689	2.26935	19.6303	2.40621	2.97507	5.97119	1.95322	2.61375	2.28348
C05513	1	1	1	0.308788	37.0838	0.272153	0.217377	0.181705	0.240787	0.177691	0.210349	0.19402
C13698	1	1	1	0.313829	37.6892	0.183779	0.14616	0.116972	0.15245	0.119476	0.12024	0.119858
C08456	1	1	1	1.01322	1.0102	1.00554	1.00671	1.01078	1.01333	0.984189	0.985308	0.984748
C17359	1	1	1	0.591812	1.90699	0.73298	0.587587	0.450302	0.593788	2.84283	0.518937	1.68088
C00525	1	1	1	1.00121	1.0786	0.972035	1.03144	0.908457	0.872744	0.881769	0.904497	0.893133
C07369	1	1	1	3.73212	4.01119	30.8209	0.793665	4.83153	20.0492	0.781191	0.471701	0.626446
C11301	1	1	1	2.21712	0.978243	59.8093	1.72609	3.37908	4.92809	0.523315	2.14868	1.336
C03982	1	1	1	0.698388	0.725483	6.89148	0.730629	0.648947	4.31659	0.620711	0.662155	0.641433
C00295	1	1	1	0.476643	0.452977	0.555865	0.481393	0.691256	0.588992	0.413197	0.478471	0.445834
C15850	1	1	1	3.88794	4.46032	36.8634	3.61987	5.94724	12.5154	3.5102	5.32608	4.41814
C03002	1	1	1	0.0414803	0.0411493	0.0400507	0.0414398	0.041404	0.042107	0.040291	0.0388516	0.0395713
C21793	1	1	1	1.88967	1.94663	0.193285	1.92522	2.19268	0.175928	1.86109	2.27016	2.06563
C08306	1	1	1	0.831416	0.838236	0.809849	0.882226	0.920341	0.895165	0.896912	0.896157	0.896534
C04687	1	1	1	1.26656	1.18392	1.44509	1.34018	1.27437	1.31975	1.0866	1.22987	1.15824
C00837	1	1	1	1.56661	2.78762	247.926	2.33025	4.18449	52.4337	3.92457	6.07523	4.9999
C19205	1	1	1	0.950551	0.973719	0.966917	0.98245	1.0041	0.99714	0.969708	0.978918	0.974313
C07973	1	1	1	1.75333	1.74757	2.05674	1.70937	1.82969	1.81571	1.71031	1.44141	1.57586
C06869	1	1	1	1.0732	1.2607	1.63387	1.18294	1.2502	1.70381	1.09004	1.26403	1.17703
C08257	1	1	1	1.00412	0.955461	0.961209	1.01479	0.970289	0.979591	0.969193	0.986409	0.977801
C11118	1	1	1	1.09617	1.06417	1.03703	1.07172	0.951903	0.885305	0.910487	0.971278	0.940882
C08848	1	1	1	3.61742	4.00712	0.083102	3.8122	4.74469	0.0611237	3.20744	7.12452	5.16598
C06559	1	1	1	1.11734	1.06679	1.10794	1.08843	1.03843	1.1105	1.07135	1.0652	1.06827
C07254	1	1	1	0.452765	0.499769	0.203711	0.287844	0.460394	0.608245	0.727504	0.574107	0.650806
C01079	1	1	1	6.13001	3.08947	336.591	51.6532	10.3735	251.722	60.6706	76.445	68.5578
C12216	1	1	1	1.08682	1.02948	0.912454	1.02861	1.09182	0.9939	1.01493	1.11328	1.0641
C15823	1	1	1	5.18767	4.95517	0.899598	4.35114	9.20321	0.793656	3.79871	11.5128	7.65573
C04308	1	1	1	22.4853	26.0951	2.0806	27.8043	23.4556	3.85608	0.986502	18.8355	9.91099
C08582	1	1	1	2.45139	2.09276	0.00598925	2.38022	2.3958	0.00592497	2.72329	2.72652	2.7249
C04544	1	1	1	1.02473	1.37798	1.03187	1.04615	1.02757	1.05008	1.03753	1.03064	1.03408
C14190	1	1	1	1.02611	1.02646	0.983109	1.02351	0.997004	0.972378	0.999406	0.992187	0.995797
C11991	1	1	1	2.16323	2.18912	0.501033	1.89116	2.00468	0.518702	1.76303	1.90206	1.83254
C15604	1	1	1	2.68468	1.81237	21.2499	5.77219	2.5879	15.521	2.56896	0.789424	1.67919
C11604	1	1	1	1.2841	1.2881	1.23638	1.21112	1.09799	1.03302	1.09291	1.127	1.10996
C03912	1	1	1	1.27408	1.28121	1.28339	1.46827	1.00684	1.12576	1.08806	0.995309	1.04169
C08234	1	1	1	1.04952	1.01788	0.927178	0.977817	0.966399	0.945118	0.996836	0.960046	0.978441
C06145	1	1	1	2.84033	0.636688	7.00363	0.783028	0.679012	0.428095	0.514057	2.95997	1.73701
C02659	1	1	1	2.87616	0.575402	6.32948	0.707656	0.613652	0.386888	0.464575	2.92183	1.6932
C00135	1	1	1	1.14169	4.10441	1.45681	1.18464	1.14203	1.08631	1.14105	1.10091	1.12098
C19284	1	1	1	0.433183	0.148134	0.212219	0.130021	0.482564	0.529473	0.316135	0.370836	0.343485
C03837	1	1	1	1.08269	1.12999	1.49613	1.12068	1.27171	1.69002	1.04844	1.27332	1.16088
C01921	1	1	1	1.05089	1.06143	1.01309	1.04069	1.01246	1.00735	1.00421	1.04603	1.02512
C18499	1	1	1	1.0961	1.14605	1.45386	1.14796	1.26356	1.74017	1.05275	1.291	1.17188
C18463	1	1	1	0.818072	0.793565	0.0198919	0.80719	0.736657	0.0176514	0.858941	0.718038	0.788489
C14322	1	1	1	0.69366	0.918297	1.26565	0.91168	0.865563	0.853937	0.893577	1.40177	1.14768
HMDB0013659	1	1	1	1.02774	1.1303	0.844292	1.4956	0.895837	1.09314	0.76909	0.820851	0.794971
C12244	1	1	1	0.688781	0.942625	1.2694	0.917389	0.661447	21.4682	0.921653	1.02008	0.970869
C06178	1	1	1	0.943284	1.02408	0.914631	1.0279	0.981435	0.931006	0.963302	0.927018	0.94516
C05465	1	1	1	1.28225	1.20057	1.06593	1.21469	1.34058	1.0964	1.20353	1.51282	1.35818
C05468	1	1	1	1.19098	1.21388	1.37282	1.22591	1.2777	1.3573	1.15101	1.3189	1.23495
C02455	1	1	1	0.630979	0.628385	0.504073	0.638436	0.621356	0.573779	0.579389	0.574788	0.577088
C07113	1	1	1	2.77451	2.86095	0.100418	2.76838	3.66697	0.104677	2.88018	0.668559	1.77437
C17702	1	1	1	2.37552	74.5325	0.0130913	77.1382	10.0421	0.0122046	1.94278	71.521	36.7319
C08570	1	1	1	0.0889116	0.0909247	0.091289	0.0872204	0.0934814	0.0917753	39.6196	25.7453	32.6825
C00550	1	1	1	1.42414	1.41292	1.69386	1.54503	1.64385	1.69869	1.47993	1.51156	1.49575
C18846	1	1	1	1.10503	1.08049	0.961105	1.08055	1.16513	0.994784	1.01698	1.12234	1.06966
C15668	1	1	1	0.161642	0.16668	0.218996	0.178479	0.176214	0.186194	0.15644	0.17296	0.1647
C18282	1	1	1	0.695446	0.725564	0.739441	0.818261	0.95877	0.951579	0.910101	0.947214	0.928658
C13309	1	1	1	1.62043	1.56592	4.12637	1.61512	1.70997	1.89026	1.50009	1.62398	1.56204
C12256	1	1	1	1.04532	1.06252	1.18445	1.04468	0.907746	0.976237	0.903798	0.955231	0.929515
C00954	1	1	1	0.881173	0.853623	0.647953	0.863778	0.775396	8.12891	0.94122	0.916373	0.928797
C00475	1	1	1	1.0106	1.00862	0.977559	0.973996	0.967556	2.83483	0.917471	0.959254	0.938363
C10172	1	1	1	1.2048	1.37658	1.75339	1.23413	1.00188	1.51614	1.02395	1.13522	1.07958
C20316	1	1	1	1.16893	1.28507	1.21268	1.15373	1.15856	1.06353	1.19689	1.1039	1.15039
C16536	1	1	1	0.572319	0.609218	0.735927	0.6523	0.753557	0.841443	0.721723	0.956581	0.839152
C09211	1	1	1	0.231036	0.24551	0.00384236	0.239576	0.238978	0.0046745	0.297621	0.207053	0.252337
C19907	1	1	1	0.156138	0.710235	0.287188	0.356888	0.529938	0.380366	0.169329	0.127096	0.148212
C11134	1	1	1	2.47632	2.594	0.547849	2.71486	3.22211	0.485927	4.04588	5.3315	4.68869
C10280	1	1	1	1.00363	1.034	1.03352	1.03712	1.08402	0.911804	1.0133	1.11156	1.06243
C19526	1	1	1	95.2858	78.7506	200.138	84.7249	52.4105	73.4488	52.1298	63.1616	57.6457
C02571	1	1	1	1.20038	1.20736	1.27203	1.18392	0.967732	1.10884	1.03622	1.08982	1.06302
C11092	1	1	1	2.65949	0.399903	0.0148241	2.45183	0.441063	0.0138068	3.68946	5.23432	4.46189
C14387	1	1	1	3.57759	4.00091	36.0226	3.1255	5.08124	14.799	3.26654	4.70812	3.98733
HMDB0032024	1	1	1	3.33675	4.88534	1.07362	2.1954	5.91467	0.999939	1.67683	7.27296	4.47489
C00499	1	1	1	1.01188	1.01647	1.46024	1.04243	1.0141	301.574	0.991638	1.01428	1.00296
C07241	1	1	1	41.3101	1.07803	0.877185	36.9776	1.86037	0.868343	1.8363	6.98685	4.41157
C05328	1	1	1	1.24694	1.26746	1.52044	1.30383	1.26027	1.3697	1.08828	1.25744	1.17286
C02837	1	1	1	1.02981	0.883232	0.825104	0.902162	1.07103	0.80658	1.00983	0.881329	0.945582
C17168	1	1	1	1.10433	1.35384	1.16629	1.1235	1.13613	1.15627	1.07013	1.18196	1.12605
C06878	1	1	1	0.957441	0.920761	0.928561	0.896299	0.811704	0.868315	0.885059	0.808296	0.846677
C00261	1	1	1	1.03581	1.0231	1.01888	1.06766	1.03222	0.980789	1.01372	1.02375	1.01873
C10636	1	1	1	0.955655	0.98638	0.926829	0.977607	0.870988	0.866695	0.932428	0.877513	0.904971
C08357	1	1	1	1.7533	0.255295	2.66485	3.10005	0.437649	6.43856	0.316548	4.61884	2.46769
C01234	1	1	1	0.943284	1.02408	0.914631	1.0279	0.911437	1.06321	0.963302	0.908369	0.935835
C01620	1	1	1	1.05659	1.07397	1.04702	1.05594	0.917529	0.901163	0.913539	0.965526	0.939532
C13843	1	1	1	1.03691	1.04327	1.25125	1.01219	1.24537	1.18165	0.975121	1.05913	1.01712
C04663	1	1	1	96.5075	13.9339	1059.95	85.261	147.179	46.0734	46.4175	71.9958	59.2067
C17047	1	1	1	2.87698	2.96949	0.398379	2.74313	3.2239	0.40362	1.89127	3.3255	2.60839
C00791	1	1	1	1.20529	7.34692	1.75411	1.23464	1.00229	2.15825	1.02437	1.13568	1.08003
C09000	1	1	1	1.10937	1.22668	1.51773	1.07408	0.947311	1.24519	0.981902	0.987912	0.984907
C19173	1	1	1	2.97209	18.2707	0.0212965	2.17582	21.8938	0.0217615	2.04558	3.95991	3.00275
C02572	1	1	1	1.06784	1.27813	1.47562	1.10532	1.25427	1.58566	1.03407	1.25587	1.14497
C16785	1	1	1	1.43779	1.46603	1.92447	1.52855	1.87356	2.37959	1.50115	1.50734	1.50425
C01403	1	1	1	0.0781512	2.53376	0.200674	2.48744	2.79989	0.145146	2.15483	0.0906701	1.12275
C15322	1	1	1	1.03219	0.987563	1.07989	0.92559	0.9973	1.01863	0.936144	0.923038	0.929591
C04584	1	1	1	1.14105	1.11105	1.06662	1.07144	1.11024	1.12619	0.87591	1.01305	0.944481
C01455	1	1	1	1.95914	1.86664	0.118305	2.49442	1.62476	0.0864851	0.73526	2.12747	1.43137
C09421	1	1	1	2.58249	3.86799	10.5267	2.03935	3.77298	1.51977	1.43053	5.17204	3.30128
C00318	1	1	1	1.20529	1.37715	1.75411	1.23464	1.07437	6.9192	1.02437	1.13568	1.08003
C17038	1	1	1	1.06011	0.997882	0.939713	0.995912	1.11329	0.916397	0.996049	1.08409	1.04007
C08057	1	1	1	1.13086	1.14222	0.523206	0.534332	0.59673	0.52888	1.15048	0.548893	0.849685
C15025	1	1	1	1.5144	1.56204	1.76021	1.44371	1.23424	1.63556	1.17457	1.42881	1.30169
C05122	1	1	1	1.06333	1.02095	0.933333	1.06387	1.04293	0.863624	0.967446	1.00691	0.987176
C19954	1	1	1	0.998583	0.96534	1.10309	0.985937	1.02923	1.03616	1.03416	0.964756	0.999459
C01563	1	1	1	0.184991	0.182426	0.181926	0.176455	0.177748	0.180296	0.174374	0.177238	0.175806
C19282	1	1	1	1.10428	1.0566	1.09428	1.07964	0.958943	0.869383	0.910725	0.975688	0.943207
C11195	1	1	1	0.950605	0.686217	0.79025	1.01034	0.650778	0.671732	1.02909	1.05453	1.04181
C20543	1	1	1	2.04166	1.81458	0.0142687	2.04012	2.16346	0.0136195	2.36462	2.26035	2.31248
C18495	1	1	1	1.013	0.981168	1.0582	1.06722	0.923965	0.84072	0.921655	0.975837	0.948746
C14596	1	1	1	0.908402	0.890076	7.1562	0.992134	0.947741	1.12671	1.04066	0.933969	0.987315
C07544	1	1	1	1.06767	1.03948	0.924623	1.03953	1.1209	1.02415	1.02143	1.10692	1.06418
C19892	1	1	1	3.16679	3.20596	5.56735	2.50954	3.7526	3.17553	3.02998	4.51452	3.77225
C02420	1	1	1	0.768142	0.742517	1.00931	0.764173	0.824037	0.893882	0.672378	0.824873	0.748625
C08972	1	1	1	1.14005	1.18954	1.00471	1.19102	1.29346	0.9913	1.04431	1.11586	1.08008
C15584	1	1	1	0.964698	1.02507	0.942444	1.03046	0.982387	0.931909	0.984191	1.00666	0.995428
C18435	1	1	1	1.11592	1.14119	1.21799	1.11669	1.17328	1.20708	1.12392	1.18661	1.15527
C10997	1	1	1	0.188769	0.176772	0.0668309	0.185745	0.233538	0.0659082	0.404544	0.356637	0.38059
C19506	1	1	1	1.01256	0.98321	1.10792	1.72286	2.70324	1.01576	1.03869	3.42613	2.23241
C03228	1	1	1	1.20224	1.20924	1.27401	1.18576	0.980509	2.04303	1.03783	1.09152	1.06467
C06694	1	1	1	1.45439	1.44375	1.75512	1.46149	1.73675	1.67184	1.44566	1.41661	1.43113
C18399	1	1	1	1.01545	1.0489	1.07591	1.0486	0.213292	1.12125	0.948797	1.05091	0.999854
C18514	1	1	1	0.997041	0.977279	1.04892	0.978009	1.00107	1.01676	1.00949	1.0208	1.01514
C01874	1	1	1	1.04242	1.05319	1.02683	1.02812	1.01712	1.01498	1.00815	1.01366	1.01091
C19128	1	1	1	2.45477	2.55548	7.74959	3.262	2.68619	4.1025	2.70596	2.93839	2.82217
C00318	1	1	1	0.957441	0.920761	0.928561	0.896299	0.811704	0.868315	0.885059	0.808296	0.846677
C11510	1	1	1	1.02526	1.06091	1.07084	1.06712	1.02845	0.990498	1.02533	0.994597	1.00997
C15562	1	1	1	0.883484	0.908904	0.865957	0.939465	0.95388	0.922138	0.902602	0.891201	0.896902
C12454	1	1	1	2.32326	2.08983	0.954658	2.1177	2.3865	0.788046	1.37544	1.98976	1.6826
C04104	1	1	1	1.25448	1.25067	1.58163	1.32815	1.338	1.34806	1.16415	1.35712	1.26063
C14402	1	1	1	1.01132	1.02796	1.30755	1.08119	1.06277	1.11494	0.954305	1.03619	0.995247
C19031	1	1	1	1.19553	1.18799	1.46711	1.2399	1.10395	1.15456	0.890525	0.867664	0.879094
C00546	1	1	1	0.460902	1.444	0.376588	0.571807	0.503224	1.90317	0.668102	0.520887	0.594495
C03113	1	1	1	0.478542	0.762018	0.847968	0.771719	0.640711	0.9187	0.520931	0.392589	0.45676
C07115	1	1	1	4.18879	9.01594	74.9157	12.5045	37.8182	53.1226	29.5384	17.5049	23.5217
C15032	1	1	1	0.175176	0.173779	0.169139	0.175005	0.174854	0.177823	0.170154	0.164075	0.167114
C00257	1	1	1	1.10328	1.10309	1.07288	1.09797	1.0516	1.08174	1.07511	1.04558	1.06034
C06756	1	1	1	2.69645	2.5685	0.0885078	2.5703	2.54683	0.0875564	2.72431	3.10462	2.91446
C19310	1	1	1	2.32391	2.0651	0.25537	2.29034	2.51543	0.234842	2.29507	2.57172	2.4334
C05143	1	1	1	1.06924	1.03802	1.01155	1.06858	0.928516	0.863554	0.88969	0.977088	0.933389
C09420	1	1	1	2.11232	1.84216	0.0179056	2.129	2.22519	0.0177134	2.03041	2.30716	2.16878
C09020	1	1	1	0.0718754	0.0830152	0.031323	0.116763	0.175734	0.742413	0.122499	0.222949	0.172724
C01995	1	1	1	3.27239	3.33445	9.61116	3.08635	3.17615	5.5396	2.73681	3.90249	3.31965
C17547	1	1	1	1.09648	1.03863	0.920567	1.04417	1.15611	0.989534	1.0294	1.1417	1.08555
C14395	1	1	1	1.42964	1.81119	0.605813	1.87771	1.97688	1.29826	2.93352	3.65403	3.29377
C00099	1	1	1	1.58818	1.1071	5.49613	1.94354	0.942404	9.47567	0.941719	0.947484	0.944601
C00855	1	1	1	3.1722	1.33013	2.04809	1.79054	1.39478	27.6337	1.01853	1.50571	1.26212
C01659	1	1	1	1.21096	4.18265	1.49077	3.36983	2.11946	13.2915	1.42221	1.71242	1.56732
C08953	1	1	1	1.40222	1.48542	1.9249	1.70612	1.57717	1.89573	1.48403	1.53107	1.50755
C02334	1	1	1	1.67855	1.62645	1.28011	3.28461	2.90525	1.37314	1.66343	1.46816	1.56579
C00670	1	1	1	1.08437	1.05145	1.07455	1.0837	0.938238	0.853707	0.935892	0.990911	0.963402
C09313	1	1	1	5.93257	6.87215	13.2427	6.13855	6.31761	0.0457503	5.4714	7.61414	6.54277
C02648	1	1	1	1.0391	1.08123	1.05409	1.06307	0.920378	0.90725	0.919709	0.972048	0.945879
C19138	1	1	1	0.572235	0.664006	0.69852	0.557929	0.470327	0.581939	0.492031	0.502173	0.497102
C13355	1	1	1	5.19042	7.33049	48.3132	1.14657	7.11653	9.26013	1.62593	7.115	4.37047
C05562	1	1	1	1.08436	0.983563	0.887645	0.969345	0.929906	0.788091	0.0583883	0.716632	0.38751
C17540	1	1	1	1.85454	2.50396	0.821624	2.9607	2.75114	0.691666	1.76667	0.279319	1.023
C02008	1	1	1	0.443238	1.19957	0.397542	0.47467	0.465773	0.426884	0.43451	0.428242	0.431376
C11758	1	1	1	1.03731	1.04853	1.01571	1.04409	1.06273	1.01212	1.04439	1.05898	1.05169
C15502	1	1	1	1.05489	19.4033	81.9308	1.12927	1.15313	36.5795	2.61995	1.134	1.87697
C06562	1	1	1	1.13695	1.27813	1.47562	1.19994	1.15677	1.10034	1.09535	1.11512	1.10523
C09766	1	1	1	18.0866	4.08678	108.05	12.5107	19.1742	11.2714	7.02846	19.8053	13.4169
C11849	1	1	1	1.20948	1.18912	1.44216	1.17977	1.35797	1.64937	1.49079	1.377	1.43389
C00571	1	1	1	0.622462	0.62295	0.728682	0.654485	0.62235	0.644512	0.629908	0.622014	0.625961
C09362	1	1	1	1.05161	1.05958	1.04997	1.02152	1.03752	1.02152	1.0242	1.00816	1.01618
C07463	1	1	1	3.42063	0.826378	0.366116	3.13867	0.545491	1.0919	0.341351	0.705013	0.523182
C19131	1	1	1	0.704305	0.707337	0.790421	0.84513	0.932894	0.932287	1.12114	1.15771	1.13942
C03690	1	1	1	2.08504	2.97948	1.32765	2.52304	2.22022	2.40373	2.33249	0.340893	1.33669
C02115	1	1	1	0.957441	0.988224	0.928561	0.974215	0.832339	0.868315	0.885059	0.879153	0.882106
C12891	1	1	1	1.08335	1.03846	0.916502	1.04735	1.10134	1.05614	1.05333	1.12299	1.08816
C11001	1	1	1	0.851186	0.878547	0.846097	0.920238	0.959774	0.947069	0.942776	0.942525	0.942651
C06356	1	1	1	1.04538	1.08849	1.00566	1.06949	1.07177	1.0165	1.03406	1.0485	1.04128
C07321	1	1	1	0.17215	0.13461	0.122116	0.160648	0.177397	1.35198	1.51533	1.68235	1.59884
C01136	1	1	1	5.23336	2.47889	0.99346	1.03645	0.746287	1.06271	0.654201	0.431946	0.543074
C15903	1	1	1	2.87494	1.73722	5.64096	1.61488	1.85693	1.84858	1.55728	2.58437	2.07082
C08095	1	1	1	1.07265	1.02632	1.04551	1.0119	1.10076	0.956092	1.06662	1.08656	1.07659
C09953	1	1	1	1.03945	1.04658	1.16497	1.06066	1.08225	1.03138	1.01206	1.03097	1.02152
C10487	1	1	1	1.08273	1.05648	1.1747	1.06937	1.0144	1.04	1.02554	1.01749	1.02152
C07872	1	1	1	1.67648	2.07253	0.0463209	6.83488	8.72612	0.0418491	3.07382	1.79219	2.43301
C21217	1	1	1	3.29155	4.93075	0.0128354	4.01555	5.55063	0.0550062	1.8983	3.42481	2.66156
C01569	1	1	1	1.28051	1.27662	1.61189	1.33283	1.36576	1.37603	1.17642	1.38528	1.28085
C08148	1	1	1	5.48591	0.140795	0.0196056	5.68673	10.6597	0.0182175	7.64467	8.23974	7.9422
C10149	1	1	1	1.04022	1.01049	1.0308	1.03958	0.903317	0.840118	0.897791	0.95057	0.924181
C16365	1	1	1	0.974722	1.04621	0.862469	0.998612	0.889703	0.852198	0.952464	0.864678	0.908571
C00388	1	1	1	0.57008	0.541774	0.664832	0.575761	0.620022	0.576115	0.494196	0.572266	0.533231
C14460	1	1	1	0.851758	0.714349	0.869636	0.771663	0.655456	0.74038	0.697488	0.801184	0.749336
C11014	1	1	1	1.07374	1.1154	1.08696	1.10175	0.984213	0.927924	0.954318	1.01804	0.986177
C01595	1	1	1	1.34185	1.25511	2.10371	1.38132	1.4543	5.40831	1.26683	1.50422	1.38553
C04152	1	1	1	0.559265	0.624285	0.629908	1.44558	1.51003	0.619062	1.7061	1.31341	1.50975
C15561	1	1	1	1.08092	1.15272	1.27427	1.18292	0.980707	1.11119	1.03804	1.05853	1.04829
HMDB0253028	1	1	1	1.20249	1.15272	1.42204	1.18292	0.980707	1.17207	1.03804	1.09174	1.06489
C09622	1	1	1	1.05578	1.03875	1.01916	1.06134	1.0461	1.00307	1.00591	1.01067	1.00829
C07289	1	1	1	1.45506	1.50776	1.88446	1.55666	1.70157	1.7878	1.54144	1.68016	1.6108
C11544	1	1	1	0.990218	0.970591	1.05533	0.971316	0.994215	1.04139	0.981442	1.04702	1.01423
C01267	1	1	1	0.991491	0.981856	0.993241	0.971532	1.01684	0.999903	1.00352	0.980119	0.991819
C12915	1	1	1	2.83337	2.8686	0.122779	3.91741	7.02305	0.112566	2.43382	7.28377	4.85879
C07425	1	1	1	0.238977	0.207982	0.359742	0.231159	0.597957	3.5448	3.25595	2.96123	3.10859
C03065	1	1	1	0.951584	1.02507	0.937501	1.03046	0.982387	0.931909	0.974228	0.951084	0.962656
HMDB0013158	1	1	1	1.0205	0.982259	1.22208	1.00101	1.0044	1.0825	0.962228	0.97063	0.966429
C08804	1	1	1	1.32776	1.79371	0.821926	1.25898	1.55622	0.828826	1.05893	1.12152	1.09022
C18412	1	1	1	9.04222	6.65096	0.318992	7.50919	10.6712	0.331886	0.990333	5.54924	3.26979
C09795	1	1	1	1.21948	1.16701	1.25646	1.16491	1.17833	1.21638	1.04295	1.15127	1.09711
C00280	1	1	1	0.402898	0.714697	0.0982685	0.28059	0.232758	0.0905244	1.31157	0.341751	0.82666
C17614	1	1	1	5.56581	4.9541	0.0358546	5.26894	7.3342	0.0327202	4.10393	7.9897	6.04682
C14852	1	1	1	0.792226	1.00374	1.30364	0.7402	1.22759	1.11303	77.8808	1.03215	39.4565
HMDB0000439	1	1	1	0.787968	1.77476	1.77659	0.740825	0.697364	1.43741	1.77472	1.73025	1.75248
C01620.	1	1	1	1.08031	1.24826	1.64469	1.19078	1.25849	1.71509	1.09726	1.2724	1.18483
C00219	1	1	1	1.30893	1.2414	2.01048	1.36622	1.43841	12.6933	1.28098	1.48779	1.38438
C00253	1	1	1	1.01891	1.05912	1.03145	1.04549	0.933956	0.880542	0.905588	0.966053	0.935821
C10460	1	1	1	1.1465	1.22895	1.40599	1.21929	1.45808	1.44402	1.17969	1.40322	1.29146
C14519	1	1	1	1.22654	6.57302	1.60887	1.28505	1.02842	1.34035	1.05044	1.05716	1.0538
C17710	1	1	1	0.958351	0.940246	1.11548	0.966042	1.01975	1.05863	0.956633	0.948262	0.952448
C00183	1	1	1	0.867243	0.963406	0.902556	0.959105	1.01403	0.967989	1.02758	1.00346	1.01552
C11959	1	1	1	4.93706	3.14191	0.177594	3.2774	5.49123	0.162405	0.987189	5.39005	3.18862
C16746	1	1	1	1.94091	3.03564	4.78532	2.75338	3.33577	0.972849	2.24785	0.899621	1.57374
C02502	1	1	1	1.15239	1.26326	1.153	1.17543	1.0367	1.05999	1.03259	1.02423	1.02841
C00712	1	1	1	1.18475	1.23822	1.41659	1.22849	1.46908	1.4549	1.2799	1.4138	1.34685
C05189	1	1	1	4.36946	2.82458	0.0341614	3.17305	3.41301	0.0346508	1.80254	4.34376	3.07315
C08898	1	1	1	1.5688	1.5942	0.866413	1.46525	1.39207	0.327153	0.942918	1.20274	1.07283
C03066	1	1	1	29.4384	87.9315	278.797	33.9497	30.8541	45.4011	16.5361	31.0035	23.7698
C05853	1	1	1	0.799402	0.798774	0.652413	0.838278	1.22884	2.03471	1.07481	1.06796	1.07138
C13140	1	1	1	0.602707	0.738434	0.297086	0.701854	0.512715	0.461539	0.660886	0.611456	0.636171
C00903	1	1	1	21.3719	42.1548	170.869	20.4744	6.76657	56.2102	12.9649	27.8939	20.4294
C02059	1	1	1	1.51146	1.50416	1.85838	1.48967	1.67398	1.60963	1.43501	1.6368	1.53591
C01879	1	1	1	1.17989	1.33013	1.64572	1.16371	0.968074	1.3502	1.01853	1.07122	1.04488
C05282	1	1	1	2.88733	3.79381	2.56302	5.36365	6.1041	1.42963	1.92203	2.91149	2.41676
C16996	1	1	1	0.643204	0.683825	1.18411	0.733654	0.653002	1.19458	0.876144	0.590805	0.733474
C19444	1	1	1	0.857079	1.2058	0.867627	0.879433	0.785615	0.740685	1.14757	0.812614	0.980093
C07593	1	1	1	1.30684	1.65778	1.61856	1.29751	1.17423	1.19504	1.03569	1.19718	1.11643
C05403	1	1	1	1.08349	1.05488	0.93832	1.05493	1.13751	0.97361	1.01283	1.12332	1.06808
C01453	1	1	1	1.10326	1.09263	1.04239	1.10229	1.12427	0.972458	1.08399	1.08602	1.08501
C05601	1	1	1	2.52617	2.90097	10.1725	2.82379	5.22607	5.39283	2.44765	4.64764	3.54765
C01697	1	1	1	0.419696	2.33087	1.0241	0.53241	0.178586	0.162167	0.155958	0.158773	0.157366
C03373	1	1	1	1.5144	1.75727	1.84862	1.47654	1.18167	1.54009	1.20698	1.32899	1.26798
C16450	1	1	1	2.96103	2.61012	0.15311	3.19156	3.18403	0.151467	1.72938	3.82698	2.77818
C16921	1	1	1	1.00609	1.03653	1.03604	1.03965	1.08667	0.902138	1.01578	1.11427	1.06503
C10313	1	1	1	1.10428	1.07204	1.0447	1.07964	0.958943	0.891852	0.910725	0.978461	0.944593
C09180	1	1	1	1.60484	0.974311	0.0374125	1.59309	1.61773	0.0377265	1.79444	0.380616	1.08753
C07063	1	1	1	1.07073	1.06501	60.0599	1.14622	1.17044	10.2788	1.01419	1.14234	1.07827
C04751	1	1	1	6.31667	19.0253	62.1472	6.05395	16.7779	35.3675	2.53036	3.80527	3.16782
C10959	1	1	1	2.23047	297.216	1.46455	1.13098	1.24486	1.65435	1.02631	1.268	1.14716
C16994	1	1	1	1.27933	1.27544	1.6104	1.33161	1.3645	1.37476	1.17533	1.384	1.27967
C04102	1	1	1	1.53217	1.54239	0.649261	1.44664	1.58494	0.648482	1.47776	1.53129	1.50452
C18801	1	1	1	1.19109	8.79674	1.66135	1.17171	0.977265	1.36301	1.02821	1.0814	1.0548
C07007	1	1	1	1.79744	1.63074	2.36038	1.93406	2.13457	2.22166	1.97586	2.56015	2.26801
C15556	1	1	1	0.631237	0.685667	1.11575	0.629444	0.603578	1.1855	0.903112	0.536299	0.719705
C11371	1	1	1	1.05432	1.05426	1.13293	1.05107	1.12175	1.51429	1.58031	1.53182	1.55606
C06819	1	1	1	1.14907	1.27001	1.46624	1.19231	1.14942	1.09334	1.14843	1.10803	1.12823
C16440	1	1	1	1.12241	1.13198	1.15142	1.17423	1.07989	1.15665	1.18896	1.18236	1.18566
C04022	1	1	1	1.11462	1.1511	1.29646	1.14832	1.06194	1.18481	1.10159	1.11407	1.10783
C16150	1	1	1	0.621383	0.91503	0.84096	0.922403	0.899504	1.0355	1.02612	1.02669	1.02641
C19434	1	1	1	1.07999	1.0363	1.07877	1.01695	1.05245	1.03662	1.07587	1.06683	1.07135
C18934	1	1	1	13.279	1.26718	12.3194	6.44712	12.3412	8.469	21.8665	9.29125	15.5789
C04122	1	1	1	277.342	7.0157	576.51	156.689	289.807	122.831	180.059	328.442	254.251
HMDB0013078	1	1	1	1.47881	1.50281	1.80163	1.54204	1.67529	1.66622	1.48546	1.54599	1.51573
C08362	1	1	1	1.41566	1.32943	1.75688	1.44059	1.52522	1.65067	1.28133	1.50638	1.39386
C02923	1	1	1	1.20249	1.26922	1.49077	1.18292	0.980707	1.21336	1.03804	1.09174	1.06489
C15545	1	1	1	2.6621	3.08276	0.162288	2.76496	40.612	0.110312	2.8026	3.60046	3.20153
C21247	1	1	1	1.06006	1.02824	32.9719	1.03392	1.045	58.9961	1.5626	1.02706	1.29483
C14853	1	1	1	1.0545	0.855765	0.86217	1.18837	1.21884	1.25959	1.06551	1.35687	1.21119
C08292	1	1	1	1.14273	1.09654	1.06591	1.06282	0.987722	0.995899	1.01144	1.01187	1.01165
C19994	1	1	1	1.68459	1.63292	3.99842	1.59417	1.77512	1.96638	1.41038	1.60707	1.50873
C02726	1	1	1	1.06347	1.05268	1.06227	1.08091	1.04528	1.04386	1.05941	1.05051	1.05496
C12150	1	1	1	1.04357	1.01332	1.0852	0.969733	0.958856	0.965436	1.02093	1.00768	1.0143
C05239	1	1	1	1.2631	1.26339	1.65966	1.33491	1.32815	1.46986	1.17007	1.36933	1.2697
C12333	1	1	1	0.708547	2.39162	2.04564	0.687466	1.32342	1.68825	0.696787	0.691073	0.69393
C00786	1	1	1	1.01517	1.00238	0.984482	0.997337	0.98141	0.95868	1.00519	0.999041	1.00211
C19181	1	1	1	1.14447	1.12237	1.11517	1.10144	1.08734	1.14982	0.971444	0.999008	0.985226
C14333	1	1	1	0.516774	0.698286	0.286659	0.691575	0.540482	0.602367	0.426354	0.579969	0.503161
C10306	1	1	1	3.17271	3.14645	2.50722	3.28567	4.22072	3.17972	3.09149	4.56635	3.82892
C13812	1	1	1	4.02459	4.37819	0.275314	3.46404	5.71734	0.241119	2.72986	4.91904	3.82445
C09866	1	1	1	1.07757	1.04911	0.933193	1.04917	1.09212	0.965894	0.977103	1.08974	1.03342
C09311	1	1	1	1.06213	1.03639	1.15235	1.04903	1.07053	1.05257	1.00603	1.01534	1.01069
C02990	1	1	1	1.53588	1.58955	0.686893	1.49087	1.63341	0.696273	1.44254	1.57811	1.51033
C03059	1	1	1	1.03159	1.01816	0.963188	1.02763	0.999699	0.925624	0.977553	0.999876	0.988715
C19272	1	1	1	0.444523	1.03112	1.08107	0.933588	1.07158	1.1121	0.971667	0.921486	0.946576
C01598	1	1	1	8.04095	6.72124	2.09415	7.68246	8.73029	1.82954	4.82499	8.71931	6.77215
C13728	1	1	1	1.16202	1.17661	1.27243	1.16654	1.02854	1.06885	1.04122	1.03279	1.037
C14422	1	1	1	1.03503	1.01507	1.09652	1.10283	1.09525	1.11977	1.07228	1.06875	1.07052
C18236	1	1	1	1.10705	1.19939	1.63802	1.17577	1.47579	1.43044	1.14301	1.1681	1.15556
C08858	1	1	1	1.18738	1.17985	1.08331	1.10816	1.13218	1.11664	1.25779	1.17776	1.21777
C07287	1	1	1	1.01317	0.965313	0.906957	1.03368	1.0143	0.934261	0.976165	0.972393	0.974279
C08966	1	1	1	1.04486	1.00571	1.26552	1.0407	0.996079	1.10834	1.01185	0.95028	0.981063
C10550	1	1	1	1.01141	1.02864	1.00066	1.03868	1.06193	1.00687	1.02298	1.02329	1.02313
C18261	1	1	1	5.73893	6.70804	59.7033	5.40845	2.27044	9.149	1.76612	2.0571	1.91161
C20441	1	1	1	1.00031	1.09553	1.06591	1.06282	0.987722	0.995899	1.01144	0.980171	0.995803
C08369	1	1	1	0.437486	0.403185	0.434356	0.417665	2.98737	0.456479	3.01742	2.99756	3.00749
C03219	1	1	1	1.5144	1.87234	1.84862	1.47654	1.23424	11.9303	1.20698	1.42881	1.31789
C18557	1	1	1	1.10222	1.04124	1.04141	1.10126	1.08408	0.990502	1.04691	1.085	1.06596
C02395	1	1	1	4.65188	4.2876	0.544063	1.72641	4.70056	0.538215	2.31644	5.01575	3.66609
C09627	1	1	1	0.420518	0.401709	0.328382	0.467954	0.621209	0.318364	0.467901	6.64164	3.55477
C07327	1	1	1	1.21173	1.21878	1.28406	1.19201	0.988244	1.11973	1.04602	1.10013	1.07307
C14343	1	1	1	185.452	28.7335	732.184	179.958	127.197	63.2202	93.0701	111.452	102.261
C16146	1	1	1	0.915036	0.852416	1.11813	0.999379	0.954662	0.915464	1.04826	0.927042	0.987651
C04167	1	1	1	120.812	51.816	574.532	98.3023	94.1703	130.273	33.3075	17.3957	25.3516
C06551	1	1	1	1.19107	1.25717	1.47661	1.17474	0.971396	166.693	1.02818	1.08137	1.05478
C09591	1	1	1	1.32872	1.68553	1.64566	1.31923	1.19389	1.10626	1.05303	1.1651	1.10906
C07124	1	1	1	5.11325	4.42786	0.157641	3.97792	6.47833	0.167032	2.88772	1.93303	2.41037
C04100	1	1	1	1.65578	1.60008	1.96332	1.65035	1.74727	1.93149	1.53281	1.65941	1.59611
C07971	1	1	1	0.786615	0.80725	0.500544	0.81507	1.04981	2.17887	1.11186	0.654488	0.883175
C00408	1	1	1	1.03681	1.04507	1.16201	1.02415	1.0795	1.02876	1.00117	1.01795	1.00956
C03861	1	1	1	1.033	1.04337	1.00549	1.04806	1.06706	1.01173	1.02792	1.02823	1.02807
C14213	1	1	1	1.02464	1.00665	1.0376	1.05236	1.03313	1.05591	1.00922	1.02987	1.01955
C15145	1	1	1	2.84151	2.93288	0.400334	2.70932	3.18416	0.414451	1.86796	3.28451	2.57623
C14752	1	1	1	1.959	7.08839	0.0498953	1.96938	1.45077	0.0518573	2.04129	11.1589	6.60011
C09086	1	1	1	5.51337	5.15148	20.9178	4.9554	1.59845	3.63219	0.630711	6.02644	3.32858
C07040	1	1	1	1.27074	1.25312	1.23241	1.15515	1.22099	1.05023	1.19781	1.05602	1.12691
C06820	1	1	1	1.06255	1.07957	1.01291	1.08706	1.08938	0.979473	1.02811	1.04141	1.03476
C00256	1	1	1	1.436	1.38177	5.66065	5.61623	1.47516	1.33718	1.3898	6.12556	3.75768
C07653	1	1	1	129.642	10.4483	1.22558	95.885	3.66381	5.03646	76.0127	43.7568	59.8848
C15494	1	1	1	1.16725	1.1556	1.03974	1.14504	0.952705	1.11337	0.943657	1.00627	0.974964
C15152	1	1	1	1.0155	1.02476	0.995466	1.01781	1.08171	1.01369	1.00005	1.03274	1.0164
C16566	1	1	1	1.96764	1.29683	0.0557847	1.97729	2.01162	0.0532467	2.28887	1.98819	2.13853
C06469	1	1	1	1.00121	1.0786	0.972035	1.06331	0.908457	0.872744	0.913214	0.959552	0.936383
C09724	1	1	1	0.955539	1.02047	0.991669	1.02129	0.987419	0.999005	0.999502	1.01767	1.00858
C08497	1	1	1	1.1449	1.15156	1.35394	1.1292	0.980699	1.11594	0.992789	1.03946	1.01612
C00633	1	1	1	1.11387	1.17575	1.45075	1.16471	1.00051	1.19573	1.0295	1.0799	1.0547
C16527	1	1	1	1.62043	1.56592	1.73098	1.58957	1.69054	1.85371	1.50009	1.62398	1.56204
C00380	1	1	1	0.936107	0.981025	0.955793	1.03377	0.826492	0.858161	0.849321	0.918279	0.8838
C00299	1	1	1	1.09509	1.12912	1.16765	1.12219	1.08041	1.18138	1.11766	1.11821	1.11793
C06499	1	1	1	1.02387	1.01097	0.99292	1.00589	0.989822	0.966898	1.01216	1.0076	1.00988
C14758	1	1	1	1.48147	1.4698	1.76205	1.49743	1.71003	1.68992	1.5395	1.5701	1.5548
C10511	1	1	1	11.0775	0.64664	0.665511	0.841245	0.621142	0.824354	0.752135	0.842178	0.797157
C12835	1	1	1	0.49681	0.464963	0.112065	0.44487	0.246434	0.0389779	0.350917	0.231073	0.290995
C14428	1	1	1	1.02617	1.05038	1.07044	1.05398	1.00845	1.05629	0.997926	1.06201	1.02997
C11334	1	1	1	1.03411	1.0284	1.01852	1.05469	1.05801	1.00765	1.04095	1.01821	1.02958
C07641	1	1	1	1.66067	1.40842	2.84553	1.72703	1.47827	2.45107	1.10046	1.2351	1.16778
C17954	1	1	1	5.34908	6.7242	0.0538553	4.00208	0.131485	0.052279	3.82191	12.3171	8.06949
C18750	1	1	1	1.1156	1.20622	1.28946	1.1661	1.05621	1.20035	1.09565	1.10806	1.10185
C00253	1	1	1	1.02166	1.11891	1.10844	1.0855	1.0088	1.01902	1.03302	1.00109	1.01705
C19137	1	1	1	1.12144	1.2607	1.69354	1.18294	1.2502	1.70381	1.18176	1.26403	1.22289
C02126	1	1	1	0.0357836	2.4324	0.0563822	1.22555	0.0700481	2.32878	0.0411912	0.796282	0.418736
C06837	1	1	1	1.06363	1.17609	0.941958	1.32997	1.15331	1.28722	1.03178	0.926018	0.978898
C14788	1	1	1	0.963645	1.50838	0.87222	1.76286	1.16792	1.39014	1.26448	1.22144	1.24296
C11584	1	1	1	1.10739	1.05369	0.905843	1.09162	1.04388	0.933389	0.99128	1.05302	1.02215
C15214	1	1	1	1.20395	0.863275	1.13146	1.21908	1.19063	1.12968	0.948809	1.13876	1.04379
C07263	1	1	1	1.21173	1.21878	1.28406	1.19511	0.988244	1.11973	1.04602	1.10013	1.07307
C17958	1	1	1	2.00777	2.23711	1.67388	1.60739	1.80473	2.51334	9.77278	13.9768	11.8748
C16993	1	1	1	0.947861	0.923102	1.09514	0.98895	1.03237	1.03932	0.963314	0.930972	0.947143
C09948	1	1	1	1.88815	1.83399	1.09476	1.43946	3.5506	1.00758	1.00156	1.65557	1.32857
C00747	1	1	1	1.21173	1.21878	1.28406	1.19511	0.988244	1.11973	1.04602	1.10013	1.07307
C14396	1	1	1	1.51711	1.2228	0.518624	1.59933	1.35208	0.444609	1.25947	1.71802	1.48874
C14533	1	1	1	1.42737	1.51971	0.578627	2.02447	1.47268	0.551925	1.47185	1.39237	1.43211
C12367	1	1	1	1.02473	0.993962	0.968023	1.00762	1.00602	0.962736	0.992725	0.985921	0.989323
C03019	1	1	1	1.04829	0.978954	0.871017	0.967101	1.10009	0.926296	0.995735	0.97522	0.985478
C09563	1	1	1	0.278575	0.561926	0.0109616	0.373887	0.266725	0.0111105	0.497462	0.342624	0.420043
C03691	1	1	1	1.18687	1.34613	1.37724	1.77533	0.690028	0.964149	0.530593	0.604613	0.567603
C01185	1	1	1	1.06042	1.02946	1.05082	1.05977	0.920859	0.90277	0.916854	0.96903	0.942942
C11769	1	1	1	0.538493	0.554802	0.661503	0.562987	0.462098	0.469346	0.54822	0.460564	0.504392
C11960	1	1	1	0.998565	0.344065	1.44562	0.331925	0.459957	1.25913	0.807511	0.676004	0.741757
C02927	1	1	1	1.49872	0.537262	0.516685	0.566721	1.57688	0.29622	2.59941	0.292581	1.44599
C08810	1	1	1	0.0170066	0.0176776	0.0155617	0.0172693	0.0192522	0.0156821	4.35033	0.0201936	2.18526
C03017	1	1	1	1.15239	1.26326	1.153	1.17543	1.0367	1.05999	1.03259	1.02423	1.02841
C11709	1	1	1	1.00561	1.03139	0.996766	1.02175	1.0887	1.00546	1.00651	1.02335	1.01493
C14441	1	1	1	1.0647	1.04753	1.02777	1.07031	1.05074	0.994001	1.01441	1.01921	1.01681
C18615	1	1	1	1.50628	1.26184	2.80051	1.18464	7.58252	3.95022	1.2869	4.47649	2.8817
C19530	1	1	1	1.05639	1.01681	1.26506	0.998492	1.01904	0.965314	0.973728	0.951593	0.96266
C07002	1	1	1	1.03126	1.01541	0.889575	1.00612	0.990321	0.974453	1.01113	0.989314	1.00022
C16185	1	1	1	1.08309	1.05099	1.24489	0.992687	1.04141	1.01925	1.0292	0.96181	0.995507
C03124	1	1	1	1.114	1.20693	1.64831	1.18316	1.21681	1.6583	1.1502	1.23027	1.19023
C00740	1	1	1	0.977463	1.0082	0.883867	0.999916	0.890864	0.85331	0.953707	0.865806	0.909756
C00483	1	1	1	0.947304	1.02867	0.91873	1.03251	0.863377	0.935178	0.938658	0.881136	0.909897
C02633	1	1	1	1.03538	1.1068	1.13859	1.03821	1.07025	1.10793	1.0233	1.10212	1.06271
C06861	1	1	1	0.393121	0.349466	0.320847	0.365117	0.370575	19.9848	0.348252	0.373821	0.361036
C01210	1	1	1	0.101188	0.0990754	0.108338	0.102451	0.104131	0.107367	0.0990486	0.104465	0.101757
C11309	1	1	1	1.12354	1.19019	1.05829	1.05489	1.15185	0.985663	1.07424	1.21107	1.14265
C19400	1	1	1	1.23738	1.24458	1.31124	1.22041	0.973688	1.10511	1.05415	1.12342	1.08879
C03882	1	1	1	0.932602	0.86878	1.13959	1.01856	0.972989	0.933039	1.06839	0.944839	1.00661
C06002	1	1	1	1.20529	1.37715	1.75411	1.23464	1.00229	1.51676	1.02437	1.13568	1.08003
C12599	1	1	1	1.04646	1.16093	1.16559	1.11364	1.01645	1.1718	1.13129	1.20714	1.16921
C06385	1	1	1	1.21683	1.22391	1.28947	1.20015	0.957521	1.08676	1.03665	1.10476	1.07071
C07272	1	1	1	0.496004	2.41014	0.386558	2.3112	2.45514	2.32621	0.453923	2.51371	1.48382
C15571	1	1	1	1.04834	1.02217	1.05254	1.06514	1.04424	0.928587	1.03056	1.03564	1.0331
C08719	1	1	1	1.13517	1.20251	1.05178	1.06581	1.16377	0.970821	1.00416	1.2236	1.11388
C03154	1	1	1	1.05089	1.06143	0.959026	1.04069	1.01246	0.995152	1.00421	1.04603	1.02512
C02078	1	1	1	8.16928	3.88622	0.695621	6.14603	7.4614	0.641673	2.34488	5.67711	4.011
C06055	1	1	1	0.991491	0.981856	0.993241	0.971532	1.01684	0.999903	1.00352	0.980119	0.991819
C11085	1	1	1	1.13695	1.27813	1.47562	1.14657	1.25427	1.58566	1.04094	1.25587	1.1484
C02066	1	1	1	0.760243	0.821335	0.766432	0.897556	0.985566	0.949729	0.975727	0.970175	0.972951
C14291	1	1	1	1.08269	1.12999	3.82947	1.12068	1.27171	1.75577	2.99218	1.27332	2.13275
C14179	1	1	1	0.991491	0.981856	0.946534	0.971532	0.965246	0.999903	1.00352	0.980119	0.991819
C08021	1	1	1	1.55825	1.45398	2.07304	0.203078	1.67832	1.58731	1.40043	1.45414	1.42728
C01169	1	1	1	4.18131	1.27813	24.4634	2.63351	4.84312	2.75623	1.53121	5.35093	3.44107
[truncated: 1,326 more rows]
