# Supplementary material for: β-catenin driven innate and metabolic reprograming in macrophages fuel T-cells dependent inflammation in Toxoplasma gondii infection: implications for therapeutic intervention
Source: Research Square preprint supplement (doi:10.21203/rs.3.rs-8453530/v1), 2026-02-09
Supplement: Supplementary file 5 [file Macrophage_metabolites_final.xlsx]

## Sheet: Sheet1
Sample	SP1	SP2	SP3	SPI1	SPI2	SPI3	SPID1	SPID2	SPID4	SPUD1	SPUD2	SPUD3
Label	UNINFECTED	UNINFECTED	UNINFECTED	INFECTED	INFECTED	INFECTED	INFECTED+D	INFECTED+D	INFECTED+D	UNINFECTED+D	UNINFECTED+D	UNINFECTED+D
C00135	1.79266e+07	1.25032e+06	1.9101e+06	2.71959e+07	1.54011e+07	2.91694e+08	2.989e+06	1.29538e+06	1.36911e+06	6.39044e+06	1.29299e+06	3.84171e+06
C00328	333605	267646	238434	252187	234259	427551	178569	207247	183385	170015	168964	169489
C00490	1.36879e+06	3.44428e+07	7.80617e+07	4.59897e+06	5.30924e+06	518169	5.5141e+06	5.45361e+06	5.52773e+06	1.67311e+06	1.69931e+06	1.68621e+06
C00878	316161	246281	212185	206834	199753	299556	167433	147183	158799	173377	185710	179544
C01489	214024	638241	439558	596413	583219	865359	1.1407e+06	288630	546326	495731	489031	492381
C01591	2.27336e+08	4.04965e+08	6.31987e+08	1.01544e+07	8.68514e+08	8.4549e+08	9.35144e+08	8.10329e+08	9.62533e+08	3.04384e+09	4.34187e+06	1.52409e+09
C01595	3.05331e+06	1.34203e+06	1.70083e+06	1.38488e+06	1.11807e+06	1.34574e+07	454447	361603	421738	1.2535e+06	1.76259e+06	1.50804e+06
C01904	1.24219e+06	2.19084e+06	1.3435e+06	1.87091e+06	3.61636e+06	1.66238e+06	2.08022e+06	2.02591e+06	2.06358e+06	1.23586e+06	1.30465e+06	1.27026e+06
C02837	1.20494e+08	1.19193e+08	1.07202e+08	1.32426e+08	1.03714e+08	1.39585e+08	8.691e+07	1.08529e+08	1.10508e+08	9.67916e+07	1.14065e+08	1.05428e+08
C06940	989155	824794	848566	79313.5	92515.9	111505	72405.7	71293.5	72985.8	821578	84457.8	453018
C06953	155349	138405	137763	119998	118936	130344	123717	133952	126570	117944	125182	121563
C07063	1.00739e+07	5.13687e+06	347444	5.648e+07	9.31647e+06	1.15703e+07	1.23506e+07	1.50138e+07	1.36063e+07	719418	5.89752e+07	2.98473e+07
C08475	893316	432279	855381	378832	356870	502490	323540	309236	308467	797659	456699	627179
C08691	446631	181821	225541	199634	174074	231541	139662	130714	139382	200433	246802	223618
C09098	4.08167e+08	4.17943e+08	4.2194e+08	4.8396e+08	4.62351e+08	4.22724e+08	4.58629e+08	4.47318e+08	4.53825e+08	4.23868e+08	4.36248e+08	4.30058e+08
C09100	85812.2	77796.1	77496.2	66050.6	69715.9	232686	70587	75900.7	75297.7	69475.1	69229.2	69352.2
C09419	1.6309e+06	853796	307084	226106	226192	244186	313768	235181	647206	256772	220672	238722
C09633	2.13008e+06	353738	2.68545e+06	346201	328506	445297	262158	262829	276540	1.65809e+06	338990	998538
C09674	809891	540581	388774	185198	196199	193232	189252	257913	190216	259711	185248	222480
C09697	1.60098e+06	1.60904e+06	937212	1.25833e+06	1.22143e+06	1.30839e+06	910414	839140	823945	1.01685e+06	1.45377e+06	1.23531e+06
C10149	1.17401e+08	5.99664e+07	4.09756e+07	4.60237e+07	4.03255e+07	1.77313e+08	1.97602e+07	4.81737e+07	1.13347e+07	5.09916e+07	4.74018e+07	4.91967e+07
C10341	220002	142032	233192	108820	102449	131045	105902	105827	93533.7	192865	136298	164582
C10460	9.26931e+06	4.23272e+06	5.15074e+06	3.06367e+06	2.49649e+06	2.80325e+07	9.49791e+06	4.54257e+06	9.68784e+06	2.95076e+06	2.86941e+06	2.91009e+06
C10462	5.84e+08	3.67066e+08	2.60808e+08	4.02622e+08	3.61648e+08	5.14154e+08	2.11398e+08	1.94483e+08	2.20471e+08	3.0739e+08	3.67951e+08	3.3767e+08
C10550	1.71255e+06	771852	1.99124e+07	1.08804e+06	827720	894734	814995	718844	1.03937e+06	2.17666e+07	605050	1.11858e+07
C10576	513628	323676	418948	371120	283771	235672	187072	481624	255110	321481	725114	523297
C10636	2.23361e+07	2.19534e+07	2.43131e+07	1.99431e+07	7.70778e+07	9.03796e+07	2.3565e+07	2.40271e+07	2.43515e+07	9.91282e+07	9.28106e+07	9.59694e+07
C10851	5.15997e+06	1.52474e+07	4.1898e+07	9.62411e+06	5.35483e+06	1.10129e+06	2.73722e+06	4.5022e+06	2.9258e+06	279248	2.53641e+06	1.40783e+06
C10927	697399	219963	1.04787e+06	197612	195568	205762	173298	189107	167042	1.13341e+06	200253	666833
C11721	2.30479e+06	1.72617e+06	1.38513e+07	1.50184e+06	1.21972e+06	1.17182e+09	713995	673018	732676	1.27468e+07	1.62643e+06	7.18659e+06
C12032	2.5478e+06	1.44738e+06	1.54065e+06	3.7828e+06	2.37776e+06	2.61205e+06	766541	479917	783354	2.25633e+06	3.58179e+06	2.91906e+06
C12391	26038	23654.8	25124.3	21034.7	20956.7	20342.8	23107.6	22715.8	22195.6	21575.9	21535.9	21555.9
C14291	684398	307004	472824	2.81351e+06	2.24188e+06	387893	323342	268693	278982	990807	256401	623604
C14322	4.04782e+06	6.97883e+06	3.41011e+06	6.81979e+06	6.18302e+06	4.79125e+06	8.39469e+06	8.31463e+06	8.14107e+06	2.29957e+06	3.68347e+06	2.99152e+06
C14743	2.11418e+06	2.67191e+06	1.38713e+06	8.51646e+06	1.57835e+06	7.50483e+06	1.26026e+06	700574	596135	1.13091e+06	2.61849e+06	1.8747e+06
C14859	3.87933e+06	5.48411e+06	4.3401e+06	3.71693e+06	4.3345e+06	4.4446e+06	5.08911e+06	3.1147e+06	5.38203e+06	3.32571e+06	4.71407e+06	4.01989e+06
C15678	638055	243069	3.92228e+06	425278	319824	363430	189323	190579	207473	3.5027e+06	454522	1.97861e+06
C15819	634625	550357	264423	343704	300381	576563	213184	204221	214809	286550	430928	358739
C16624	194576	171831	142554	1.05549e+06	616790	5.14027e+06	149535	170072	133219	134513	146976	140745
C16625	234767	192518	136327	189766	202994	205767	167071	232098	159387	152626	159768	156197
C16891	803005	3.44283e+06	505263	443178	653517	657855	3.74227e+06	1.11062e+06	1.37379e+06	195735	405330	300533
C17005	4.05078e+08	1.32663e+08	2.25708e+07	1.26193e+08	1.09494e+08	1.33546e+08	4.5466e+07	3.5844e+07	4.40727e+07	2.29145e+07	1.88974e+07	2.0906e+07
C17156	481735	365545	306494	407590	421870	424589	246294	210249	229659	334148	406774	370461
C17968	1.36202e+07	276205	2.56816e+06	409709	716782	1.20722e+06	347091	193190	206173	2.99397e+06	724609	1.85929e+06
C17992	337333	299233	1.5029e+06	283942	1.57426e+06	1.94573e+06	631915	348853	617959	1.46614e+06	1.42305e+06	1.44459e+06
C18466	282064	263341	211724	188637	184924	268518	158560	141952	148822	166476	172549	169512
C18470	2.11001e+07	8.51453e+06	3.51191e+06	4.83172e+06	5.83091e+06	4.26029e+06	920167	781540	843305	1.48567e+06	5.29789e+06	3.39178e+06
C18504	851803	3.57979e+06	900427	998806	3.45241e+06	3.37283e+06	4.79948e+06	4.14678e+06	754270	545129	969430	757280
C19114	76879	78819	207600	61400.9	62618.8	58158.5	63441.2	58751.8	57337.9	150707	55110.3	102909
C19994	6.18508e+07	4.34822e+07	8.37275e+07	2.66404e+07	2.23154e+07	2.68084e+07	2.032e+07	1.13566e+07	1.96543e+07	5.47696e+07	2.12858e+07	3.80277e+07
D04563	1.21331e+06	1.06542e+06	1.29157e+06	761464	747727	780787	778464	765041	778660	1.05004e+06	784752	917398
C00003	1.91777e+09	1.33266e+09	1.34743e+09	1.24016e+09	1.29766e+09	1.17162e+09	1.07e+09	9.21238e+08	9.89393e+08	1.31344e+09	1.28318e+09	1.29831e+09
C00004	4.57372e+08	3.05562e+08	7.84876e+08	4.86033e+08	7.32602e+08	7.48055e+08	6.74187e+08	6.14976e+08	6.34155e+08	7.10623e+08	6.85331e+08	6.97977e+08
C00005	1.8898e+06	1.23655e+06	834802	815476	702386	874100	612220	583136	579258	712764	838435	775599
C00008	1.11145e+07	6.8173e+07	1.01077e+06	2.08585e+07	3.04114e+07	2.0541e+07	3.72128e+06	1.16584e+07	6.20682e+06	4.83701e+07	1.13802e+07	2.98752e+07
C00009	4.40243e+07	6.73397e+07	4.83224e+07	1.59391e+07	1.16425e+07	7.06656e+06	9.75771e+07	1.16641e+08	1.01783e+08	7.8017e+07	1.19496e+08	9.87565e+07
C00019	390600	352224	496009	255320	258083	272266	244489	246393	248491	347665	266666	307165
C00021	386837	310353	276480	292427	285150	474151	243514	247190	218575	215947	195925	205936
C00022	2.71432e+08	3.70729e+07	1.90856e+08	2.03017e+07	2.29265e+07	1.72456e+07	1.9992e+07	1.6867e+07	1.93081e+07	2.98709e+07	3.37537e+07	3.18123e+07
C00025	1.0122e+06	999955	825455	1.12162e+06	986402	9.99671e+06	1.05539e+06	1.11093e+06	1.15521e+06	935484	944373	939928
C00026	1.43773e+06	1.4197e+06	1.76195e+06	1.44943e+06	1.93074e+06	1.64707e+06	1.577e+06	2.25849e+06	1.75467e+06	1.09832e+06	1.12459e+06	1.11145e+06
C00031	1.7848e+06	969935	1.03778e+06	1.2828e+06	1.10215e+06	644605	646327	904892	819862	565132	360499	462815
C00036	4.63329e+07	3.71607e+07	2.56394e+07	2.66158e+07	2.02282e+07	1.22033e+07	1.00346e+06	2.76637e+06	3.75047e+06	2.34629e+07	4.20018e+07	3.27323e+07
C00037	3.93148e+07	3.68042e+07	3.03113e+08	1.20529e+07	1.44309e+07	2.77248e+07	1.6825e+07	1.61896e+07	1.63818e+07	2.04967e+07	3.25507e+07	2.65237e+07
C00042	1.61356e+06	1.62386e+06	102106	533281	990418	1.53349e+06	2.14892e+06	217414	333150	324394	93851.7	209123
C00049	5.0387e+06	3.08087e+06	2.23242e+06	3.38329e+06	3.11948e+06	3.63181e+06	3.51989e+06	4.9077e+06	1.95559e+06	2.0715e+06	3.52149e+06	2.7965e+06
C00059	613029	393222	328131	571729	496352	660516	313574	252317	283019	258250	294349	276299
C00061	346459	331113	235735	356453	307484	386110	303861	344707	275715	241027	246702	243865
C00062	1.52209e+08	5.63432e+07	838980	1.85453e+08	1.26205e+08	8.73237e+08	3.64598e+07	966874	9.84709e+06	1.24575e+07	2.23354e+07	1.73965e+07
C00064	5.21818e+07	6.1508e+06	3.23303e+06	2.2663e+07	2.4271e+07	1.49794e+08	1.99541e+06	609211	323428	1.23338e+06	5.04042e+06	3.1369e+06
C00065	3.92389e+06	1.99309e+06	231398	478247	592103	3.35197e+06	173300	201132	177974	164998	577332	371165
C00074	241844	244169	364438	214696	147733	168881	337140	161295	195617	302666	774557	538612
C00075	1.97409e+06	203479	890289	939385	908977	964503	811880	980618	369163	909901	841821	875861
C00078	183892	184412	92727.6	160260	152685	238941	149710	179769	148545	102239	154133	128186
C00079	1.10256e+07	2.70754e+07	796405	1.08884e+08	6.43373e+07	5.16452e+08	4.22125e+06	1.51541e+06	1.95142e+06	570881	9.30691e+06	4.9389e+06
C00080	1.34127e+06	1.46207e+06	1.51678e+06	1.37092e+06	1.44441e+06	1.46581e+06	1.1522e+06	1.01835e+06	1.10484e+06	1.3817e+06	1.41163e+06	1.39666e+06
C00082	980302	459928	938674	415721	391620	514776	347255	339347	338504	875331	501169	688250
C00086	262884	250101	218241	184268	162606	176864	169625	161919	175461	172776	174643	173710
C00093	1.01881e+06	615147	3.65294e+06	552642	546925	602400	564468	546605	541509	3.24083e+06	560026	1.90043e+06
C00099	2.8992e+08	2.48096e+08	2.04348e+08	1.63436e+08	1.61106e+08	9.65076e+07	1.26879e+08	1.24202e+08	1.22946e+08	1.78037e+08	1.97658e+08	1.87848e+08
C00106	2.79505e+07	3.18752e+07	2.10004e+07	2.84524e+07	2.93667e+07	6.36772e+07	7.03939e+06	2.66873e+06	2.56282e+06	2.90462e+07	2.83063e+07	2.86763e+07
C00108	312584	250220	297597	205913	197106	182620	215103	192157	186294	208727	202826	205777
C00110	2.10085e+06	829728	566369	1.46232e+06	1.16216e+06	2.26447e+07	373923	369261	399821	547358	1.62422e+06	1.08579e+06
C00111	574563	337839	368909	369883	309732	379373	276780	237216	246163	436048	355642	395845
C00114	1.85366e+08	1.20107e+08	2.70057e+07	4.86575e+08	7.03196e+08	7.52536e+09	3.22618e+08	3.10692e+08	1.69191e+08	5.08106e+07	6.27925e+07	5.68015e+07
C00118	1.80161e+06	1.24497e+07	914785	2.32668e+06	541032	1.15606e+06	4.93272e+06	436458	3.39948e+06	560893	1.21403e+06	887461
C00122	3.00976e+08	1.77405e+08	9.16628e+07	6.61664e+07	8.2072e+07	8.48018e+07	1.8554e+07	1.62008e+07	9.69374e+07	1.13395e+08	7.55049e+07	9.44497e+07
C00123	1.29534e+06	2.11874e+06	4.81278e+06	1.4578e+06	1.26723e+06	1.84494e+06	440111	448175	509545	1.85002e+06	1.60822e+06	1.72912e+06
C00125	1.20976e+06	930437	927862	1.4128e+06	1.66496e+06	1.66426e+06	1.6382e+06	797725	1.09385e+06	699108	1.3142e+06	1.00665e+06
C00144	140004	772573	70205.5	120173	121406	632193	120511	127988	113188	73680.4	125544	99612.2
C00147	416138	472227	294104	321817	593279	978653	228039	256591	228754	236826	239045	237935
C00148	3.29053e+08	2.95536e+08	2.38444e+08	1.66831e+08	1.62466e+08	5.60641e+08	8.45852e+07	7.75376e+07	7.10159e+07	1.4447e+08	1.48219e+08	1.46345e+08
C00149	690569	972167	531572	922244	832941	878938	635847	842144	574895	498446	641169	569807
C00153	4.48356e+07	1.16909e+07	4.85676e+06	994268	434097	532494	330253	374280	3.82098e+06	4.70764e+06	5.04207e+06	4.87485e+06
C00158	4.26316e+07	2.1747e+07	1.60254e+07	1.82532e+07	2.74478e+07	2.76721e+07	3.11123e+06	818627	2.55571e+06	1.97261e+07	2.13619e+07	2.0544e+07
C00166	335715	219496	212586	162672	181372	351208	227216	134059	196480	331304	430327	380816
C00170	7.36424e+07	1.41527e+07	1.70995e+06	7.64898e+06	4.90112e+06	4.94518e+06	1.3018e+06	1.23259e+06	1.25649e+06	1.48163e+06	3.67884e+07	1.9135e+07
C00183	1.55463e+08	2.0525e+08	2.06659e+08	1.61138e+08	1.81649e+08	1.81237e+08	1.90203e+08	1.89658e+08	1.91971e+08	1.82253e+08	1.63499e+08	1.72876e+08
C00188	2.2253e+06	1.3057e+06	2.40078e+06	1.50749e+06	1.34402e+06	1.51613e+06	1.6641e+06	1.84207e+06	2.46758e+06	2.71867e+06	1.54993e+06	2.1343e+06
C00197	1.05885e+10	4.10445e+09	5.12465e+09	3.77957e+09	3.21047e+09	4.8527e+09	8.85281e+08	5.95668e+08	8.46874e+08	3.7051e+09	4.34556e+09	4.02533e+09
C00207	76805.1	81567.9	80201.9	50281.3	53065.4	56759.9	53926.6	62013.1	55112.5	297070	60950.5	179010
C00214	19717.3	19792.1	22632.7	18935.4	16882.5	17486.6	16232.3	15878.6	17112.8	21607.6	17981.2	19794.4
C00219	3.25985e+06	1.43282e+06	1.69699e+06	1.47856e+06	1.21284e+06	1.93681e+07	485188	386064	450267	1.44511e+06	1.97709e+06	1.7111e+06
C00227	541629	438508	366269	488441	439054	695465	408891	376929	390101	295552	327155	311354
C00236	606186	239123	436596	6.55525e+06	4.68909e+06	1.35178e+07	1.10958e+06	708198	375800	340916	247962	294439
C00249	2.35606e+06	842644	1.22486e+06	5.3343e+06	4.21649e+06	2.76455e+07	257321	392988	634601	1.05006e+06	2.7469e+06	1.89848e+06
C00251	5.82114e+06	5.89345e+06	5.92311e+06	3.88444e+06	3.78005e+06	1.66386e+07	3.10468e+06	3.06081e+06	2.94771e+06	5.21623e+06	5.5601e+06	5.38817e+06
C00253	2.92925e+07	3.69992e+06	4.40648e+07	733966	3.50569e+06	2.0064e+06	863244	561702	648831	6.97062e+07	2.71543e+06	3.62108e+07
C00256	537681	936123	521911	406061	3.36428e+06	497530	1.22762e+06	1.072e+06	3.47957e+06	400490	349989	375239
C00257	4.0781e+06	1.89163e+06	735751	1.3375e+06	1.50972e+06	1.73039e+08	1.18156e+06	1.3381e+06	1.12608e+06	7.7151e+06	1.17149e+06	4.44329e+06
C00261	9.29095e+07	1.02773e+08	8.79536e+07	1.12564e+08	1.08136e+08	1.23916e+08	9.5447e+07	9.45231e+07	9.37725e+07	1.07094e+08	1.14737e+08	1.10915e+08
C00280	6.35076e+06	4.17e+07	7.93058e+07	2.57732e+07	3.06343e+07	4.06659e+07	2.32958e+07	2.73644e+07	3.46347e+07	1.46397e+07	1.51261e+07	1.48829e+07
C00284	463630	359181	324217	1.07955e+07	9.24563e+06	9.95513e+06	313940	327570	772186	263455	269182	266319
C00294	351124	287273	1.30039e+06	841452	986202	920211	481896	462589	593562	1.25903e+06	453620	856324
C00295	5.22646e+08	1.3937e+08	1.37407e+08	6.54556e+07	7.29484e+08	2.54698e+08	7.87275e+08	1.39233e+08	3.51456e+08	5.43412e+07	7.15413e+07	6.29413e+07
C00296	101296	71104.9	411058	910589	137874	65997.7	1.65076e+06	559736	336211	467437	63556.1	265497
C00299	1.19209e+08	3.37765e+07	2.84122e+06	1.11935e+07	1.11688e+07	4.1973e+06	530428	988997	677938	9.91034e+06	1.22567e+07	1.10835e+07
C00311	4.63329e+07	3.71607e+07	2.46483e+07	4.08471e+07	4.07612e+07	2.14407e+07	1.0256e+06	2.57363e+06	3.51488e+06	2.23096e+07	4.20018e+07	3.21557e+07
C00318	4.86755e+07	2.81748e+07	3.30649e+06	1.45146e+08	1.47231e+08	8.81026e+07	4.79351e+06	516477	499647	7.46856e+06	1.06254e+07	9.04696e+06
C00331	814180	360332	258098	1.88518e+06	3.00455e+06	443322	267104	280470	243908	269422	269802	269612
C00337	351890	362778	168397	310531	300328	309858	289061	338629	289584	176732	301134	238933
C00341	2.06165e+06	1.68592e+06	1.2882e+06	1.43904e+06	1.32664e+06	2.43642e+06	1.13235e+06	1.1216e+06	1.08347e+06	1.18902e+06	1.22488e+06	1.20695e+06
C00354	8.77e+07	8.37943e+07	1.42382e+07	1.62867e+06	1.70724e+07	1.98505e+06	4.61764e+06	740130	806231	3.08708e+06	2.46404e+07	1.38637e+07
C00355	292926	148949	254566	374171	164208	266844	345325	287724	636486	301664	160630	231147
C00363	138412	1.73002e+06	158638	251486	1.52287e+06	280314	1.23584e+06	366633	157381	113667	1.20377e+06	658719
C00366	3.79031e+06	1.38504e+07	458798	1.98697e+07	619174	6.47743e+08	534253	613076	490370	1.68028e+06	3.97959e+06	2.82994e+06
C00380	1.70092e+06	7.43344e+06	5.1644e+06	2.19931e+07	2.40857e+07	1.25631e+07	1.26675e+07	1.15339e+06	8.45512e+06	935143	5.03611e+06	2.98563e+06
C00384	509270	358015	168787	255480	240262	449496	157783	166421	150099	221862	250676	236269
C00385	224789	231245	157067	2.32435e+06	1.28021e+06	8.30661e+06	212213	212523	194931	161669	172293	166981
C00388	1.14135e+08	3.59184e+07	7.79576e+07	1.74168e+07	6.78012e+07	7.36555e+07	3.8728e+07	2.12369e+07	1.27291e+08	5.08287e+06	4.89554e+07	2.70191e+07
C00390	4.05067e+07	307020	9.9748e+06	1.39408e+07	9.92733e+06	1.18519e+07	4.86538e+06	3.16593e+06	3.79456e+06	2.3195e+06	2.06057e+07	1.14626e+07
C00396	1.74318e+08	6.97343e+08	9.55195e+08	7.67138e+08	8.02724e+08	8.1011e+08	8.16816e+08	8.27745e+08	8.41097e+08	1.27986e+09	8.34988e+08	1.05742e+09
C00397	1.15205e+06	469683	1.24466e+06	1.65959e+06	1.3402e+06	1.62723e+06	1.07071e+06	919834	1.36674e+06	331334	3.14502e+06	1.73818e+06
C00399	2.81958e+07	239289	1.11617e+07	1.54971e+07	1.11035e+07	1.29085e+07	4.7461e+06	2.75306e+06	3.90092e+06	734939	2.40058e+07	1.23703e+07
C00407	3.96759e+08	3.60598e+07	9.0619e+07	2.36003e+08	2.09661e+08	1.37893e+09	3.82039e+07	2.62891e+07	1.76053e+07	2.18887e+07	5.81382e+07	4.00134e+07
C00408	451192	372497	313761	384256	455211	3.84378e+06	409472	397848	364751	309027	318618	313822
C00413	173026	65008.3	65184.3	54877.9	55809.6	263033	58201.4	58355.5	58324.8	57770.6	58176	57973.3
C00415	6.33342e+06	1.06049e+06	1.27429e+06	807159	790050	830762	719911	726756	755830	995622	798724	897173
C00431	1.66695e+08	1.05149e+08	3.07115e+07	1.80462e+08	1.00631e+07	9.8158e+07	6.50179e+07	1.94e+07	3.14977e+07	1.0447e+08	9.08853e+07	9.76775e+07
C00440	1.0555e+06	506790	503638	749808	811004	626142	295489	275082	314202	425646	395431	410539
C00445	702399	748904	354186	650408	599151	668358	576673	694221	584225	398311	600759	499535
C00448	466048	172555	1.13042e+06	104216	96793.1	109983	70042.3	93956.1	73641.1	897312	112904	505108
C00449	2.21406e+06	154635	363718	2.21829e+06	1.72924e+06	2.31226e+06	129677	125140	124359	228430	1.38074e+06	804586
C00459	55537.1	52672.9	51683.6	44050.3	46494.8	42900.8	45890.9	46708.6	48058.8	46334.2	45996.2	46165.2
C00463	8.46097e+08	6.91893e+08	4.23809e+08	7.04205e+08	6.39081e+08	6.74698e+08	4.70709e+08	4.03011e+08	4.52513e+08	4.24924e+08	7.33966e+08	5.79445e+08
C00472	4.63667e+06	4.69408e+06	1.01444e+06	4.26824e+06	4.14383e+06	3.52466e+06	2.92723e+06	403001	289078	709965	3.67693e+06	2.19345e+06
C00475	1.08079e+06	138457	937828	2.00722e+06	2.15708e+06	8.08012e+07	240460	561691	387598	112871	239834	176353
C00483	3.50096e+07	1.48521e+07	3.78488e+06	2.42094e+06	1.94552e+06	2.5935e+06	1.12755e+06	1.09285e+06	1.09533e+06	2.42931e+06	4.82767e+06	3.62849e+06
C00495	1.30677e+06	907546	824023	1.21873e+06	1.05805e+06	1.48541e+06	668432	537853	603300	645494	674488	659991
C00499	1.59773e+06	1.58443e+06	1.2765e+06	1.06852e+06	1.04749e+06	1.57634e+06	898154	847155	864157	991155	1.04148e+06	1.01632e+06
C00500	27122	21601.2	17424.5	17740.4	17662.9	22532.6	16516.7	17139.1	17126.1	15493.5	16563.5	16028.5
C00505	9.30468e+06	8.6954e+06	4.47001e+06	9.77386e+06	9.66137e+06	9.568e+06	9.17923e+06	9.36626e+06	9.02802e+06	3.78096e+06	9.58628e+06	6.68362e+06
C00525	2.31702e+07	1.76058e+07	4.76945e+06	2.04174e+07	1.59816e+07	2.82797e+08	6.40606e+06	6.13858e+06	1.68569e+06	8.96449e+06	1.08283e+07	9.89639e+06
C00526	194190	119179	128617	126183	137560	131386	259129	390953	216846	105826	116780	111303
C00530	1.29594e+06	873714	398939	1.29747e+06	4.68642e+06	1.00613e+06	728433	415472	765156	331319	854382	592851
C00535	2.6969e+06	267421	143880	436896	541604	1.61097e+06	592517	705299	667330	115620	460318	287969
C00539	139977	162848	268951	93302.5	92313.2	99798.4	82975.7	219859	74229.2	435363	115371	275367
C00546	9.8102e+06	4.18302e+07	1.29831e+08	5.79287e+07	5.52309e+07	3.11067e+07	9.23141e+07	9.82947e+07	1.00534e+08	6.38709e+07	4.20506e+07	5.29607e+07
C00550	1.10036e+07	7.7549e+06	7.87876e+06	1.16255e+07	5.62222e+07	6.46985e+07	8.46621e+06	6.56233e+06	5.86654e+06	6.79783e+06	8.55776e+06	7.6778e+06
C00571	1.13935e+08	1.56081e+08	1.36569e+08	1.18971e+08	1.1711e+08	1.12931e+08	1.26511e+08	1.35557e+08	1.39513e+08	8.26615e+07	9.50313e+07	8.88464e+07
C00584	258513	237733	229122	174592	156840	175680	172778	174476	206834	215155	349067	282111
C00588	1.14586e+08	9.75501e+07	3.31565e+07	2.5119e+08	2.19841e+08	2.39983e+08	2.60512e+07	2.8202e+07	1.77491e+07	1.58201e+08	3.01486e+08	2.29843e+08
C00596	2.58704e+06	423772	576830	1.07346e+06	572039	1.19433e+06	1.101e+06	471755	492655	1.00812e+06	394820	701471
C00601	2.76779e+09	2.35549e+09	1.5704e+09	2.2183e+09	2.04491e+09	2.14542e+09	1.65239e+09	1.41098e+09	1.57673e+09	1.51364e+09	2.2055e+09	1.85957e+09
C00624	182317	178908	161917	116595	127844	122590	120613	127754	121329	130114	129288	129701
C00631	216974	192849	114213	2.12918e+06	2.45782e+06	688777	148822	183390	136260	128893	157329	143111
C00633	1.01841e+07	7.65901e+06	6.29585e+06	5.72449e+06	9.5528e+06	3.56097e+07	4.84677e+06	1.16351e+06	3.00785e+06	1.30717e+06	9.35638e+06	5.33178e+06
C00644	162862	163323	80406.3	150807	130959	157738	132589	159211	131558	90546.8	136507	113527
C00655	383539	298767	257404	250913	242323	363396	203116	178550	192642	210326	225287	217807
C00666	1.52028e+06	303616	1.81883e+07	1.43534e+07	4.01649e+07	8.98734e+07	2.12292e+07	6.12757e+07	2.05378e+07	1.87199e+07	471547	9.5957e+06
C00668	9.15419e+06	1.6506e+07	2.1789e+06	2.4931e+07	3.47127e+07	1.04782e+07	1.19326e+07	9.62268e+06	5.7427e+06	3.98132e+06	1.06319e+07	7.30662e+06
C00670	465626	376975	321575	392697	362605	8.11317e+06	337346	371338	305492	256054	281248	268651
C00695	9.73369e+09	3.15504e+07	2.48521e+08	2.45172e+09	6.08568e+08	8.18866e+08	4.07537e+08	2.02763e+08	3.77601e+08	4.75469e+08	2.29239e+09	1.38393e+09
C00700	1.60004e+06	279261	801219	4.68489e+06	314374	315145	905514	850689	3.38388e+06	1.44522e+06	546603	995909
C00703	854799	640638	896726	433621	1.48017e+06	1.77827e+06	1.53643e+06	1.2421e+06	1.23066e+06	617705	1.32663e+06	972167
C00712	3.52347e+06	1.32449e+06	1.91712e+06	1.93807e+06	937876	2.99694e+07	359768	386592	363297	7.10681e+06	1.06604e+06	4.08642e+06
C00740	4.15949e+07	3.74913e+07	3.12174e+07	3.54196e+07	3.65798e+07	6.05275e+07	2.35702e+07	2.39134e+07	2.26638e+07	3.41331e+07	3.52373e+07	3.46852e+07
C00747	8.53059e+07	8.37552e+07	6.54536e+06	4.63424e+06	1.08354e+06	5.91901e+06	3.97105e+06	4.87805e+06	5.60531e+06	1.6815e+06	761612	1.22156e+06
C00753	594600	625320	4.95918e+06	537486	525587	563774	536967	543282	524996	4.75747e+06	538395	2.64793e+06
C00757	2.47769e+07	2.95551e+07	2.77771e+07	2.84393e+07	3.90457e+07	3.31993e+07	3.38673e+07	3.47169e+07	3.23681e+07	2.80355e+07	3.00746e+07	2.9055e+07
C00768	1.08047e+06	1.41211e+06	2.64552e+06	1.75637e+06	1.39426e+06	3.55602e+06	1.38221e+06	3.72501e+06	1.48982e+06	1.15201e+06	737712	944861
C00786	1.21487e+07	2.54012e+06	1.67251e+07	1.28169e+07	1.05023e+07	9.35963e+06	1.1704e+07	1.2355e+07	1.18642e+07	1.64668e+07	3.58704e+07	2.61686e+07
C00788	214552	185692	131696	150979	139186	219392	95626.8	106400	107184	124747	128510	126629
C00791	8.8102e+06	4.74889e+06	1.25003e+07	7.00093e+07	6.23972e+06	3.06705e+08	5.50439e+06	2.47275e+07	411169	2.73695e+07	2.88758e+06	1.51286e+07
C00802	619013	812209	476491	826681	746632	1.99422e+06	569961	754882	515324	446797	569419	508108
C00805	628456	287981	706565	204545	208602	264640	211342	199848	191010	502050	209129	355589
C00810	2.29626e+09	2.09501e+09	2.36756e+09	1.5137e+09	1.49396e+09	1.45723e+09	1.45552e+09	1.42284e+09	1.42072e+09	2.1194e+09	1.58108e+09	1.85024e+09
C00813	9.3184e+06	4.80191e+06	3.10837e+06	4.15972e+06	3.29348e+06	4.83936e+06	1.78722e+06	1.28846e+06	1.78862e+06	2.84701e+06	3.57578e+06	3.2114e+06
C00826	85914.2	49227.1	85529.4	61037.4	54677.5	61678.5	43122.7	35346.3	285053	107113	53804.7	80458.7
C00828	4.04954e+06	1.70051e+08	937814	8.40849e+07	4.09981e+06	2.05754e+07	1.34206e+06	1.24486e+06	1.19881e+06	1.02038e+06	9.87849e+07	4.99026e+07
C00829	164519	125365	178651	108663	108736	125507	94264.8	93964.9	99995.1	154242	118973	136608
C00830	140832	56785.1	396775	73089.1	47390.2	64805.4	77956	109609	54496.8	211008	50614.2	130811
C00837	5.10499e+06	1.91769e+07	548132	6.72523e+07	4.76707e+07	4.03293e+07	8.32828e+06	6.22953e+06	7.84182e+06	418602	2.8435e+07	1.44268e+07
C00844	201231	192318	130501	199199	175005	306446	176489	200213	160141	139594	143290	141442
C00855	2.71432e+08	2.98547e+07	1.90856e+08	2.03017e+07	2.29265e+07	1.6107e+07	1.95516e+07	1.6867e+07	1.93081e+07	2.37144e+07	2.74695e+07	2.5592e+07
C00896	690322	659746	469704	719267	680287	833571	605446	686831	556142	480249	510128	495188
C00898	245725	146893	160023	167584	140671	171079	818162	268568	515966	198040	161522	179781
C00902	736021	499107	848900	1.88918e+06	1.85547e+06	1.10375e+06	338257	747584	610049	823386	1.66145e+06	1.24242e+06
C00903	1.70795e+06	1.06932e+06	818153	1.42553e+06	1.23759e+06	1.73746e+06	781856	629119	705671	755026	788939	771982
C00906	231287	301549	294793	671300	119501	209397	198828	201723	127661	244826	174817	209821
C00921	86891.2	84965.8	92811.6	72854.4	74457.7	70290.3	79282.8	78721.4	82061.9	79698.3	74764.4	77231.3
C00922	1.21426e+09	1.21341e+09	1.25827e+09	1.09579e+09	1.10354e+09	1.11063e+09	1.19601e+09	1.18655e+09	1.18505e+09	1.09081e+09	1.05132e+09	1.07107e+09
C00928	1.41469e+06	5.73998e+06	1.13766e+06	968344	2.46836e+08	3.67511e+09	8.29854e+06	7.23368e+06	1.73227e+07	877609	922164	899887
C00931	1.27583e+06	174573	246312	132129	143533	338749	113028	109117	100210	225187	125436	175311
C00939	597821	620214	2.28282e+06	582724	1.53844e+06	1.95024e+06	1.64272e+06	949271	1.73444e+06	2.31684e+06	400324	1.35858e+06
C00954	7.36229e+07	8.41398e+07	6.19867e+07	9.70465e+07	9.34603e+07	6.64503e+07	1.01081e+08	9.97526e+07	9.92803e+07	1.1663e+08	1.31108e+08	1.23869e+08
C00986	2.03168e+06	890423	7.78552e+06	4.96261e+06	1.45714e+07	9.54059e+06	2.38101e+06	803424	732174	886573	734941	810757
C00988	2.52641e+06	1.85139e+07	1.69083e+07	2.22536e+07	2.49884e+07	2.35716e+07	2.18855e+07	2.29794e+07	2.09796e+07	2.41412e+07	2.75649e+07	2.58531e+07
C00990	2.30748e+06	1.68585e+07	3.49423e+06	1.63467e+07	812260	9.11695e+06	469687	8.09813e+06	8.14054e+06	448332	3.73123e+06	2.08978e+06
C01004	2.01791e+07	3.89163e+07	2.40304e+06	1.67605e+06	2.15311e+06	5.93563e+06	1.14072e+06	3.00201e+06	1.824e+06	5.65526e+06	8.3773e+06	7.01628e+06
C01010	4.86209e+06	2.15181e+06	1.38288e+06	2.22519e+06	2.14804e+06	2.64741e+06	1.59508e+06	1.81302e+06	1.45656e+06	1.75474e+06	1.70267e+06	1.7287e+06
C01017	1.33221e+06	989294	559074	721507	636831	1.21033e+06	477543	440134	450929	601529	725988	663759
C01023	3.11452e+06	3.414e+06	3.01363e+06	3.03339e+06	3.12876e+06	3.26747e+06	2.64267e+06	2.17467e+06	3.01422e+06	3.12003e+06	3.05776e+06	3.0889e+06
C01035	1.02025e+06	261628	408848	339263	476312	412231	200130	189945	185125	328666	321811	325239
C01041	205540	196818	277060	163344	166720	202614	165052	162702	160569	290744	166752	228748
C01053	682827	588870	1.2705e+06	857872	941366	888564	724334	1.56558e+06	950004	675052	406173	540613
C01059	352668	323681	347715	263360	1.57675e+06	605522	311513	667758	935751	402484	300611	351548
C01061	72077.7	47496.3	50558.6	56561.1	31594	68511.9	83142	48576	55700.3	40628.2	38876.8	39752.5
C01068	1.42883e+06	1.36554e+06	927506	1.48874e+06	1.40806e+06	1.72533e+06	1.42374e+06	1.7789e+06	1.1511e+06	991180	1.05586e+06	1.02352e+06
C01079	1.84262e+08	1.58237e+08	1.12408e+06	3.49485e+06	6.30604e+07	1.44187e+07	2.98576e+07	1.52009e+06	2.2161e+06	1.87971e+06	7.32027e+06	4.59999e+06
C01081	2.38054e+06	502298	2.46263e+06	1.27947e+06	1.16215e+06	1.2767e+06	769334	656414	759960	2.15054e+06	1.30726e+06	1.7289e+06
C01091	402009	354279	1.73506e+06	1.15946e+06	1.01101e+06	1.29997e+06	800653	765811	881066	1.78226e+06	1.24954e+06	1.5159e+06
C01103	2.17609e+06	5.04012e+06	1.32318e+06	8.71995e+06	6.59216e+06	1.09586e+07	2.5087e+07	2.5982e+07	2.79281e+07	1.54521e+07	7.24385e+06	1.1348e+07
C01104	972784	416529	408894	442724	699037	507110	409348	523903	598466	286063	272954	279508
C01118	2.46437e+06	1.09234e+06	1.93416e+06	1.27455e+06	1.07101e+06	1.38648e+06	835571	793048	828675	1.80462e+06	1.34361e+06	1.57411e+06
C01133	1.16898e+06	570311	1.11934e+06	585862	508097	657554	423381	415931	423130	1.04381e+06	666483	855146
C01134	637024	300677	594776	323694	280728	370549	243911	229806	233784	570638	394850	482744
C01136	1.36682e+06	1.90372e+06	645059	1.27218e+07	8.15819e+06	4.38271e+06	5.83687e+06	5.76802e+06	3.44393e+06	715882	1.23637e+07	6.53979e+06
C01137	2.23516e+06	859220	1.21253e+06	815373	711453	994038	262382	209367	247497	839985	792687	816336
C01142	290902	285830	270648	204164	203182	220222	201629	196168	190240	186657	215990	201324
C01143	41386.6	42677.1	255792	42028.8	34508.6	34817.6	36859.6	37046.2	35728.4	131625	36439.7	84032.5
C01169	285952	246059	441200	3.68933e+06	421473	381144	150114	142958	153727	633997	195213	414605
C01179	1.7848e+06	969935	1.03778e+06	1.2828e+06	1.10215e+06	644605	646327	904892	819862	565132	360499	462815
C01185	2.51515e+06	1.95924e+06	1.68799e+06	2.03244e+06	1.82694e+06	3.05861e+06	1.70143e+06	1.59236e+06	1.62324e+06	1.37927e+06	1.47738e+06	1.42832e+06
C01194	543101	84141.5	83146.1	76085.3	71438.3	68679.5	75612.9	76119.8	77674.4	71207.8	74635.7	72921.8
C01205	3.21604e+09	2.87e+09	1.40371e+09	1.66163e+09	1.57144e+09	1.24319e+09	8.44197e+08	6.25358e+08	8.32827e+08	2.85246e+09	2.72809e+09	2.79027e+09
C01207	1.23309e+06	1.76141e+06	3.33476e+06	7.35879e+06	9.73733e+06	6.51832e+07	2.45711e+06	2.11035e+06	1.69054e+06	4.71218e+06	2.12078e+06	3.41648e+06
C01210	1.96693e+07	2.49042e+06	1.00795e+07	521456	1.48842e+06	5.89657e+06	2.24584e+06	512115	465732	1.42068e+07	4.4826e+06	9.34469e+06
C01214	1.55244e+06	2.57457e+06	2.18238e+06	1.10911e+06	2.10277e+06	801743	4.2482e+06	3.68432e+06	5.2529e+06	1.1887e+06	1.47384e+06	1.33127e+06
C01215	1.63886e+06	2.66177e+06	966754	1.78452e+06	4.31749e+06	2.70977e+06	3.15003e+06	3.37685e+06	3.02154e+06	784966	5.02729e+06	2.90613e+06
C01227	2.70294e+06	366953	2.43773e+06	4.90861e+07	5.5385e+07	3.75204e+07	1.22846e+07	3.40532e+06	1.05559e+07	2.01334e+06	2.38018e+07	1.29076e+07
C01234	4.59442e+08	2.75929e+08	1.98874e+08	1.87546e+08	1.78888e+08	2.97069e+08	9.22688e+07	8.63049e+07	8.42205e+07	1.88693e+08	2.09806e+08	1.99249e+08
C01235	59135.1	59232.4	59230.5	49195	51804.4	46999.8	54791.1	54525	52933.9	52269.2	51062	51665.6
C01239	290983	206290	215532	174189	143537	169906	132669	123905	118618	215575	171700	193638
C01252	518697	744435	374447	746118	566519	4.04997e+06	2.35024e+06	390228	276414	4.21842e+06	551971	2.3852e+06
C01263	4.77234e+06	2.76336e+06	2.07039e+06	2.68953e+06	2.54801e+06	3.41708e+06	1.41516e+06	1.10012e+06	1.35837e+06	1.91953e+06	2.86929e+06	2.39441e+06
C01266	270572	252995	454788	223383	214180	262120	229393	226495	230759	366090	221919	294005
C01267	1.06908e+08	1.50713e+08	7.30432e+07	1.26015e+08	1.43497e+08	1.42053e+08	1.21258e+08	1.2789e+08	1.23729e+08	1.03365e+08	1.68952e+08	1.36159e+08
C01279	223348	239056	799113	157098	168851	158950	166493	165235	154924	506061	172516	339289
C01294	264964	157843	266785	123042	135173	144192	114281	120302	110301	268090	129618	198854
C01298	448364	350816	379023	271979	249733	266357	270457	298449	277883	261399	262286	261842
C01300	479807	477479	479967	330533	315394	362360	343528	328673	319574	364925	344678	354802
C01397	696487	432627	406670	1.80493e+06	460430	451709	238068	217665	217906	561286	1.04502e+06	803153
C01403	2.33839e+08	1.23753e+08	5.37976e+08	3.21057e+08	3.6437e+08	5.71103e+07	3.63389e+07	1.51325e+08	2.0362e+08	6.26813e+08	3.61155e+08	4.93984e+08
C01407	280784	247447	1.21186e+06	7.07948e+06	4.36887e+06	1.47043e+07	1.21583e+06	716597	1.14354e+06	6.42477e+06	2.37675e+07	1.50961e+07
C01412	4.11258e+06	1.04695e+06	784214	1.04986e+06	1.05372e+06	4.10975e+06	1.47575e+06	221810	486202	2.97176e+06	9.78959e+06	6.38068e+06
C01416	372765	250158	289385	59198.4	102280	97216.9	87503	84210.2	82895.7	190568	203478	197023
C01444	4.44087e+06	1.96539e+06	1.29004e+06	2.2547e+06	2.59259e+06	2.4538e+06	1.45689e+06	1.65595e+06	1.33037e+06	1.60272e+06	1.55516e+06	1.57894e+06
C01451	92650.8	107784	80748	98911.6	89347.3	99613.6	86987.3	115406	83900.6	72420	80850.4	76635.2
C01453	1.50491e+08	7.38733e+07	6.65744e+07	5.43258e+07	1.68901e+07	4.87794e+07	1.98886e+07	1.36042e+07	1.8008e+07	9.94536e+07	5.76088e+07	7.85312e+07
C01455	3.41995e+07	1.37243e+07	3.40028e+08	1.46548e+07	3.29441e+07	3.68878e+07	5.04178e+07	3.50648e+07	2.21072e+07	4.76844e+07	4.90692e+07	4.83768e+07
C01468	1.20803e+06	1.59768e+06	451139	799373	638877	719248	1.38218e+06	593348	851717	363827	4.46987e+06	2.41685e+06
C01474	377810	463706	514361	252500	259655	275750	235938	218401	238583	240596	425367	332981
C01512	502025	319060	388693	229025	235671	248550	248129	236650	228919	345155	236191	290673
C01523	1.09913e+06	1.36312e+06	1.37225e+06	1.18561e+06	1.16995e+06	1.20787e+06	1.07296e+06	880701	914549	1.23262e+06	1.18063e+06	1.20663e+06
C01526	582134	825845	611089	518104	467683	401047	1.48203e+06	1.69483e+06	1.30093e+06	490598	349936	420267
C01530	565016	575403	2.25537e+08	368068	396754	441365	409516	421603	409162	1.3002e+08	422956	6.52217e+07
C01536	898261	1.23777e+06	893236	617864	4.17717e+06	763959	3.39188e+06	557226	3.89204e+06	1.0353e+06	888243	961772
C01541	375601	375849	193536	365962	337936	390600	292053	329985	292397	252516	289563	271039
C01546	2.45167e+06	178855	159372	246438	1.34382e+06	200781	122099	129355	142285	243749	512917	378333
C01550	4.18097e+06	2.40088e+06	1.87123e+06	2.77266e+06	2.26651e+06	2.71727e+06	1.72006e+06	1.44839e+06	1.69301e+06	1.84778e+06	2.67718e+06	2.26248e+06
C01552	793169	1.74622e+06	4.32584e+06	427502	454978	495635	466951	492197	472544	5.22012e+06	496815	2.85847e+06
C01563	1.90056e+08	2.56847e+07	4.00213e+08	822069	2.53285e+06	1.21405e+07	776443	736279	639284	1.23556e+08	8.14857e+07	1.02521e+08
C01569	1.06139e+08	1.41076e+08	1.33833e+08	1.19446e+08	1.21194e+08	5.8136e+07	1.59435e+08	1.61265e+08	1.46989e+07	7.95527e+07	8.82504e+07	8.39015e+07
C01589	6.22317e+06	995952	1.13418e+06	770215	2.8656e+06	2.02383e+06	2.05168e+06	2.31732e+06	1.76907e+06	939664	2.57782e+06	1.75874e+06
C01594	1.14211e+06	922994	952024	377958	371267	530764	253123	360767	318235	446680	570085	508382
C01596	540603	357857	800971	1.89724e+06	1.1708e+06	304859	294697	1.23993e+06	2.64854e+06	321113	260953	291033
C01598	7.691e+07	1.07247e+07	6.05678e+06	3.2739e+07	1.19516e+07	1.75838e+07	6.84356e+06	912763	4.70156e+06	6.70891e+06	3.29135e+07	1.98112e+07
C01617	508620	423806	250994	322826	357214	401585	327051	403019	303630	290556	345746	318151
C01618	494919	525821	483588	412715	427107	422138	401056	400680	403813	372087	683181	527634
C01620	4.13779e+08	4.49215e+08	1.56682e+08	3.40082e+08	4.22998e+08	1.29739e+08	1.04394e+08	4.74733e+07	5.49525e+07	1.59361e+08	2.04469e+08	1.81915e+08
C01620.	5.00725e+07	1.0007e+07	2.25804e+07	5.38876e+07	5.17304e+07	1.44576e+07	8.94643e+06	1.97151e+06	3.49966e+06	3.00303e+07	2.53294e+06	1.62816e+07
C01630	90044.3	135221	65730.5	120656	118742	116390	88885.6	108845	78001.9	61693.9	89288.2	75491.1
C01632	87603.6	58225	83696.7	330612	444279	125578	49002.1	48806.6	53495.6	73483.9	64135.5	68809.7
C01657	1.00216e+06	576631	375648	550328	456581	638892	274875	230396	288328	394723	567314	481018
C01659	2.70353e+07	2.0685e+07	1.90856e+08	2.03017e+07	2.29265e+07	1.72456e+07	1.9992e+07	1.6867e+07	1.93081e+07	1.70832e+07	1.84817e+07	1.77825e+07
C01672	679775	1.3642e+06	503448	214694	220204	436266	456758	436010	614117	190194	371222	280708
C01674	446333	375077	528190	5.34723e+06	5.57007e+06	5.32772e+06	269275	278744	273822	398059	283967	341013
C01678	8.50416e+06	7.85095e+06	8.37877e+06	6.49624e+06	7.06374e+06	7.86631e+06	5.8704e+06	5.73258e+06	5.89013e+06	8.47201e+06	7.29745e+06	7.88473e+06
C01683	573219	273391	324985	321024	240832	335464	196276	172460	471808	357242	323927	340585
C01697	6.48953e+06	5.13911e+06	8.71033e+06	4.40527e+06	1.60091e+07	1.07524e+08	636321	4.76411e+06	1.74779e+06	1.28562e+07	1.00138e+07	1.1435e+07
C01700	3.98784e+06	1.51112e+06	1.98013e+06	1.3004e+06	1.11993e+06	1.73409e+06	455296	330823	421994	1.34507e+06	1.24049e+06	1.29278e+06
C01708	669327	505184	421961	837783	505812	801211	471063	336279	449417	340491	376900	358695
C01727	1.11238e+06	398549	708420	498100	463414	567610	353219	326573	324564	553944	545316	549630
C01746	2.29102e+08	5.67055e+08	4.34838e+07	2.87172e+08	1.63159e+08	3.11011e+09	6.65778e+07	3.65367e+07	3.2422e+07	1.19643e+08	1.55135e+08	1.37389e+08
C01768	882954	192899	1.27776e+06	111159	92772.5	127070	1.14818e+06	772616	1.08092e+06	1.30864e+06	181720	745180
C01770	5.15024e+08	3.55486e+08	9.73916e+07	2.22611e+08	1.62704e+08	1.82326e+08	2.92071e+08	4.04229e+08	4.32788e+08	1.42509e+08	2.85963e+08	2.14236e+08
C01784	744108	419161	249043	108764	132292	129692	143731	127319	131229	193430	276246	234838
C01796	119516	90156.3	103513	108572	134848	128650	119423	80813.6	100217	78233.7	103985	91109.3
C01804	552581	434060	403685	321110	304617	305807	242690	238209	221657	350826	342666	346746
C01854	415737	7.45644e+06	1.15185e+07	3.72293e+06	350217	340863	150245	267172	357923	1.13644e+06	352211	744328
C01857	93307.4	111512	83540.3	102332	92437	102292	89995.4	119397	86801.9	74924.3	85214.4	80069.3
C01864	932873	560145	970172	894298	3.37184e+06	1.34682e+06	414762	1.67153e+06	409875	1.01821e+06	533809	776007
C01874	2.83865e+07	3.46585e+07	3.18624e+07	4.03045e+07	4.04031e+07	3.851e+07	4.09201e+07	4.06224e+07	4.09716e+07	3.07456e+07	3.85914e+07	3.46685e+07
C01879	5.70726e+07	1.88044e+08	1.72038e+08	1.55614e+07	2.36651e+07	4.4717e+07	1.31748e+07	7.79741e+06	7.96383e+06	5.78296e+07	5.5477e+07	5.66533e+07
C01880	308155	293082	280457	210353	206420	226897	193171	211727	209229	205937	200381	203159
C01921	931054	256090	460352	226116	216800	2.6987e+06	232200	229266	233582	370569	224634	297602
C01964	164827	142911	83757.8	115777	116701	128702	109071	125949	99393.8	94625.2	126303	110464
C01987	5.66592e+06	490900	1.5169e+06	6.64849e+06	5.75985e+06	1.01288e+06	4.40308e+06	4.21756e+06	1.09422e+06	369512	971714	670613
C01990	405315	328148	274089	341833	328556	2.95153e+06	305984	256317	291923	221169	244819	232994
C01993	2.21727e+08	1.12565e+08	7.22784e+06	1.0936e+06	9.83401e+07	2.10796e+06	2.23398e+07	785505	800742	1.15513e+07	5.33923e+07	3.24718e+07
C01995	2.03034e+08	1.49457e+08	1.10058e+08	1.02563e+08	9.94873e+07	6.63208e+07	7.30052e+07	6.85364e+07	6.81059e+07	1.05923e+08	1.15091e+08	1.10507e+08
C02008	464541	233100	283973	167322	172177	7.35537e+06	181279	169469	160586	252165	171539	211852
C02009	857179	545179	1.02167e+06	2.60115e+06	476999	1.09808e+06	610272	581376	678881	335572	521094	428333
C02010	423478	358712	1.51243e+06	219020	237601	271972	371264	832880	376272	1.47471e+06	247654	861182
C02027	619208	467034	1.83816e+06	1.671e+06	542850	1.15659e+06	291999	316241	279390	1.93746e+06	2.14287e+06	2.04017e+06
C02034	7.16553e+06	3.62978e+06	2.8335e+06	6.48347e+06	8.99509e+06	6.24141e+06	9.90386e+06	1.18837e+07	9.4638e+06	6.12704e+06	3.3741e+06	4.75057e+06
C02059	6.48511e+07	2.74035e+07	1.54093e+06	1.17667e+07	3.38638e+06	7.80968e+06	3.8747e+06	1.44769e+06	3.82159e+06	1.48475e+06	1.20938e+07	6.78926e+06
C02066	4.04653e+07	5.26081e+07	5.1011e+07	5.04875e+07	6.20335e+07	8.08418e+07	6.15258e+07	5.90809e+07	6.2161e+07	5.32111e+07	5.75574e+07	5.53842e+07
C02067	182764	176202	162934	123677	119418	125072	132493	122085	135754	131062	127543	129303
C02074	3.76755e+06	554577	3.70038e+06	6.51648e+06	5.16271e+06	6.06103e+06	2.4135e+06	1.36275e+06	2.54246e+06	3.37888e+06	7.78044e+06	5.57966e+06
C02075	1.05369e+07	3.15358e+06	2.33468e+07	1.14955e+06	1.14148e+06	1.38595e+06	2.37768e+06	1.6626e+06	1.66416e+06	669784	324314	497049
C02078	688864	764142	697841	2.46839e+06	3.42354e+06	3.54946e+06	673761	1.21908e+06	1.68863e+06	522413	730371	626392
C02115	2.69993e+08	2.26252e+08	1.99083e+08	2.05857e+08	1.2882e+08	1.56616e+08	9.50924e+07	8.89702e+07	8.61313e+07	1.36803e+08	1.45873e+08	1.41338e+08
C02126	86118.7	281346	75651.1	231478	76735.5	70034.2	137652	141998	68762.3	70013.6	78415.5	74214.6
C02134	355799	256137	249621	238200	237900	351137	193198	193163	186816	203966	202540	203253
C02137	239722	244567	118337	229677	214679	240275	187411	204435	190264	160176	188420	174298
C02174	744058	286109	162448	214861	173313	217608	161938	318164	160088	116510	215485	165998
C02199	661451	292738	185816	300325	292225	309691	216999	227858	198154	182417	225176	203797
C02214	618621	1.84433e+06	434011	456168	413633	758861	335909	363711	324815	354633	352152	353393
C02218	1.51652e+07	8.06089e+06	9.66278e+06	8.37544e+06	9.82723e+06	1.43047e+07	2.05998e+06	9.44951e+06	337416	1.08654e+07	1.05174e+07	1.06914e+07
C02223	781858	1.70999e+06	1.48206e+09	729844	1.48708e+06	2.1605e+06	536966	595215	621388	4.39902e+08	7.58803e+06	2.23745e+08
C02224	1.06343e+06	2.72432e+06	467393	3.63125e+06	4.87654e+06	530152	1.08151e+06	1.28914e+06	2.98688e+06	346331	2.21297e+06	1.27965e+06
C02234	825527	69190.7	54353.3	467146	2.15024e+06	1.66803e+07	332111	611214	317563	281418	364634	323026
C02240	2.34736e+06	3.17525e+06	4.88698e+06	2.88612e+06	5.40455e+06	2.07185e+06	4.88208e+06	3.38623e+06	5.15697e+06	4.72872e+06	3.97858e+06	4.35365e+06
C02242	349393	550111	796426	4.12465e+06	1.37819e+06	4.46108e+06	832746	619522	848791	1.20076e+06	775401	988079
C02243	1.01509e+06	491204	971980	430472	405515	570986	367642	351388	350515	944611	518952	731782
C02304	166329	174022	203076	124842	110448	170034	108274	106480	104051	165874	111492	138683
C02334	6.73115e+07	8.40102e+07	6.78101e+07	7.56048e+07	6.90275e+07	6.71807e+07	1.25255e+08	2.26622e+07	8.64855e+07	9.76147e+07	7.3593e+07	8.56038e+07
C02341	162295	452324	244564	1.27078e+06	1.10264e+06	1.49089e+06	1.37057e+06	7.80501e+06	7.99081e+06	203111	474122	338616
C02351	4.63667e+06	1.05709e+06	508154	775272	825420	587405	570287	1.8515e+06	402309	400855	3.67693e+06	2.03889e+06
C02362	565674	502041	500619	453973	434120	474488	460435	481674	476450	441395	475641	458518
C02366	1.32211e+08	1.43367e+08	7.70144e+07	6.77254e+07	8.4049e+07	3.89599e+07	3.02592e+07	2.45045e+07	2.95577e+07	2.51739e+08	2.53048e+08	2.52394e+08
C02367	287800	284953	276502	186803	196551	191203	213859	215530	214010	184672	205326	194999
C02372	1.94393e+06	2.43594e+06	1.54504e+06	651510	828112	602403	353613	554329	4.6383e+06	472667	4.57775e+06	2.52521e+06
C02376	195281	203549	346554	145331	141050	137706	147250	140654	142549	265929	147009	206469
C02389	197922	191433	175719	140244	131941	140023	134292	129481	138913	140555	156538	148547
C02395	5.21403e+06	3.68955e+06	5.1583e+07	6.67067e+07	5.09112e+07	8.05444e+07	2.30069e+07	1.36608e+07	2.44116e+07	5.63326e+07	8.46186e+07	7.04756e+07
C02413	1.55575e+06	1.49197e+06	385134	4.46774e+06	940924	2.47451e+06	6.4575e+06	792659	6.89245e+06	292290	684845	488568
C02420	3.49123e+07	5.08855e+07	2.30069e+07	4.20116e+07	4.05019e+07	2.84537e+07	5.14959e+07	4.7108e+07	7.65654e+06	8.52137e+06	3.14234e+07	1.99724e+07
C02445	155858	147221	154385	122260	288370	140334	257669	421136	198360	164546	108986	136766
C02455	3.48652e+08	5.53286e+08	7.35574e+08	4.34683e+08	4.41132e+08	3.53854e+08	5.78052e+08	6.30686e+08	6.19804e+08	6.80712e+08	4.41427e+08	5.6107e+08
C02486	8.07422e+08	2.2012e+08	2.53035e+07	1.4531e+08	1.25144e+08	1.47111e+09	4.18119e+07	2.28658e+07	1.71883e+07	1.19371e+08	2.09518e+08	1.64444e+08
C02494	518380	422489	238577	308127	271965	404913	203940	184191	174390	256890	310041	283465
C02499	294323	278003	309889	202612	197352	202847	217085	216652	227358	227040	207190	217115
C02502	6.45021e+07	6.09951e+07	2.28561e+08	9.20892e+06	1.0507e+07	9.99507e+06	9.27612e+06	9.159e+06	9.39192e+06	4.54833e+07	4.78845e+07	4.66839e+07
C02571	7.76718e+08	2.68844e+08	1.43406e+08	6.25584e+07	4.50814e+08	1.55956e+08	4.96904e+07	1.46607e+07	927318	2.2841e+08	1.26174e+08	1.77292e+08
C02572	8.05651e+06	435943	340425	506819	1.76689e+06	3.04438e+06	293465	185936	199943	287708	267285	277496
C02590	2.24029e+06	1.46588e+06	989629	949246	839080	1.01856e+06	725766	691288	690061	854616	993935	924276
C02604	575537	468040	323492	364849	349421	525118	276317	254671	256548	316209	344370	330289
C02617	430044	332983	354198	527325	570363	429774	203143	193459	208033	299348	278099	288724
C02621	748084	252747	435557	334977	311650	381723	237543	208354	215468	366129	366730	366430
C02628	230416	233237	241256	190950	193713	192661	208479	213384	215361	216482	197246	206864
C02630	5.08611e+06	2.25096e+06	1.58735e+06	2.58231e+06	2.96929e+06	2.81033e+06	1.66858e+06	1.89656e+06	1.52367e+06	1.83559e+06	1.78112e+06	1.80835e+06
C02633	1.51553e+06	3.56672e+07	328775	544894	956340	1.00996e+06	625925	418122	444501	343060	2.32329e+06	1.33317e+06
C02636	544470	360741	228584	3.27234e+06	693089	1.34355e+06	776658	1.33736e+06	513918	215715	3.76052e+06	1.98812e+06
C02640	354598	333085	314040	244270	474330	588948	215100	230766	225312	649551	256745	453148
C02646	4.49982e+07	2.37215e+06	2.21258e+06	2.08025e+06	1.42928e+06	1.86606e+06	687120	1.23642e+06	2.48154e+06	2.12176e+06	1.84329e+06	1.98252e+06
C02647	1.3314e+07	3.72061e+06	194140	3.81787e+06	8.25975e+06	1.59357e+07	764981	278134	141908	637875	3.36526e+06	2.00157e+06
C02648	3.61701e+08	1.66365e+08	1.47339e+08	9.32769e+07	9.28749e+07	1.27074e+07	6.64388e+07	6.13723e+07	6.01561e+07	1.62081e+08	1.0738e+08	1.3473e+08
C02659	1.4238e+08	9.81997e+07	1.08698e+08	3.70779e+07	4.6359e+07	3.54095e+07	3.34103e+07	2.65382e+07	4.72252e+07	8.46914e+07	7.82175e+07	8.14545e+07
C02678	739171	235029	4.76361e+06	426580	350629	525596	199705	576398	429923	3.72147e+06	459359	2.09041e+06
C02683	271593	291533	225771	156838	172044	181165	171520	154022	162131	194345	186207	190276
C02703	942681	590195	356156	581605	565467	781814	431534	347234	389485	416726	419080	417903
C02704	307027	192717	237716	140067	144131	151810	136406	141864	134428	211089	143597	177343
C02724	1.34402e+06	1.59158e+06	1.09882e+06	1.15562e+06	1.14713e+06	2.7958e+06	883837	783347	861289	1.21079e+06	1.7295e+06	1.47015e+06
C02726	2.09802e+07	1.51993e+08	2.03213e+07	1.10579e+07	9.67289e+07	9.00803e+07	1.16335e+08	1.16355e+08	1.15273e+08	1.84889e+06	1.31551e+07	7.50198e+06
C02730	814862	391249	296284	450492	518003	480359	228122	214707	242569	320225	305278	312752
C02735	4.59128e+07	1.23499e+07	4.65603e+07	2.63416e+08	2.13633e+08	1.60965e+09	3.74119e+07	2.50899e+06	575545	2.22401e+07	1.33402e+07	1.77901e+07
C02771	1.19761e+06	676786	298793	589778	485004	667136	231684	203662	240419	243082	1.23841e+06	740746
C02777	126259	130570	123239	188658	94049	253090	411490	77742.6	161216	89195	161400	125298
C02787	7.86635e+08	1.5626e+09	1.33582e+09	9.81452e+08	1.04079e+09	9.63385e+08	1.73036e+09	1.73067e+09	1.74859e+09	6.53231e+08	8.32238e+08	7.42734e+08
C02794	88448.8	53282.8	42396.9	57473.5	62655.2	115618	333187	514362	75771.5	48201.2	53190.5	50695.8
C02845	2.34001e+06	371841	782646	307200	1.3893e+06	1.03157e+06	589032	1.23307e+06	384313	621604	841787	731695
C02862	286794	328541	436610	206998	251374	281882	855498	660704	374143	363945	196710	280328
C02890	6.80558e+06	3.81571e+07	1.65074e+06	1.18491e+06	1.58456e+06	3.5245e+06	1.29147e+06	2.25914e+07	4.59907e+06	1.69564e+06	2.0894e+06	1.89252e+06
C02916	6.54803e+06	1.02629e+06	213098	342896	331007	399588	235955	238467	224452	270400	248280	259340
C02918	2.14018e+06	977304	902244	1.46107e+06	5.08467e+06	3.1622e+06	750665	589564	642219	642827	757859	700343
C02923	5.20974e+06	6.46853e+06	1.67602e+08	6.37505e+06	6.31834e+06	4.66417e+06	9.76637e+06	9.46163e+06	9.84722e+06	9.72648e+06	8.94087e+06	9.33368e+06
C02927	1.37333e+06	1.52387e+06	1.04595e+06	679039	2.73915e+06	1.77212e+06	1.12999e+06	776465	712729	1.80963e+06	731156	1.27039e+06
C02937	2.77642e+06	2.56573e+06	1.40895e+06	2.63681e+06	2.40252e+06	2.49778e+06	2.35878e+06	2.1627e+06	2.41063e+06	1.11891e+06	2.21986e+06	1.66938e+06
C02947	328619	282774	324244	447813	500447	439132	172512	170671	187068	256965	224341	240653
C02951	857826	379648	240982	539288	1.80331e+06	448903	281423	295505	256983	264722	292027	278375
C02954	906756	379149	3.02628e+06	352682	342885	420688	261309	263029	270975	4.07629e+06	348518	2.2124e+06
C02979	16114.2	16031.2	230869	14554.4	13018.4	13454.4	13444.3	13418.2	13377	66761.2	13804	40282.6
C02990	4.19796e+06	4.4258e+06	4.51364e+06	3.89542e+06	4.33606e+06	4.96816e+06	4.38248e+06	3.40036e+06	3.82535e+06	4.0021e+06	3.96376e+06	3.98293e+06
C03002	1.03787e+08	2.80671e+07	3.6026e+07	1.29007e+06	2.05351e+06	2.80524e+07	1.32641e+07	1.98601e+06	1.87418e+06	4.62331e+07	1.10709e+07	2.8652e+07
C03007	1.55085e+06	1.10415e+06	1.27986e+06	708789	4.04755e+06	2.30883e+06	3.69446e+06	756229	1.1765e+06	415566	3.36164e+06	1.8886e+06
C03017	1.03796e+06	1.79819e+06	2.41835e+06	827492	1.55483e+06	671451	1.18228e+06	1.6066e+06	2.85012e+06	429594	494150	461872
C03019	471459	373236	446569	319632	333269	334785	272505	268702	283938	388615	308990	348803
C03032	7.28345e+07	5.25975e+07	4.35442e+07	4.94044e+07	4.61958e+07	4.72111e+07	3.08525e+07	2.46098e+07	2.69229e+07	3.06682e+07	4.85608e+07	3.96145e+07
C03033	1.46818e+08	398207	1.60218e+06	1.27629e+07	5.43454e+06	1.04338e+07	1.4919e+06	606639	7.41541e+06	1.34943e+06	3.10299e+06	2.22621e+06
C03047	1.56184e+06	587796	788084	522483	435129	702191	172440	133476	174132	522130	510962	516546
C03059	1.29969e+07	7.43973e+07	4.55968e+07	8.20974e+07	7.8376e+07	7.17633e+07	6.46672e+07	9.22577e+07	9.5967e+07	9.57719e+07	1.02582e+08	9.91771e+07
C03065	1.14286e+06	1.13334e+06	919056	3.06926e+06	3.53854e+06	1.66523e+07	642450	636809	654923	708973	725675	717324
C03066	1.45977e+06	924809	712769	1.24191e+06	1.07818e+06	1.85278e+06	681147	548084	614776	657773	661489	659631
C03093	589949	510410	410252	502427	595203	616195	535398	527490	499701	404062	416603	410333
C03113	1.48601e+07	1.48551e+07	1.49546e+07	1.45857e+07	1.42997e+07	1.42631e+07	1.26889e+07	1.09908e+07	1.31148e+07	1.35752e+07	1.38698e+07	1.37225e+07
C03124	4.9488e+06	2.19019e+06	1.54449e+06	2.51259e+06	2.88912e+06	2.73446e+06	1.62353e+06	1.84535e+06	1.48254e+06	1.78603e+06	1.73303e+06	1.75953e+06
C03134	1.27191e+06	1.35662e+06	1.6843e+06	1.17659e+06	1.28656e+06	1.22125e+06	1.85167e+06	1.83087e+06	999475	1.2913e+06	1.23882e+06	1.26506e+06
C03137	242499	215220	214610	194613	182727	184181	197384	195336	193268	184695	190906	187800
C03150	403960	402439	273345	438747	712817	508471	369317	369857	339242	281355	311174	296264
C03154	229796	214868	376398	189719	181902	459437	194823	189240	195983	310920	188475	249698
C03167	203526	780627	221805	208832	211997	185403	199270	1.34161e+06	267228	127085	103629	115357
C03169	311379	195213	347727	213920	819726	387480	736659	1.11076e+06	2.08919e+06	409810	200975	305393
C03183	529816	254386	192641	292906	336800	1.85326e+06	144990	138079	148480	207014	198489	202751
C03196	235007	397422	109702	177294	466926	277968	681094	543147	202785	115308	172495	143902
C03205	2.04139e+06	648123	549624	462430	425631	447918	349595	324950	538320	435387	468118	451752
C03210	63233.8	63732.8	67412.8	53079.7	54925.7	53848.2	57121	60503	58488.4	61077.2	54607.4	57842.3
C03215	148677	197906	153417	120428	125805	361491	433497	419530	486182	198702	124003	161352
C03218	2.82409e+06	1.91397e+06	1.04571e+07	1.7448e+06	1.66331e+06	1.88412e+06	1.12878e+06	1.18981e+06	1.14579e+06	1.26188e+07	1.70896e+06	7.1639e+06
C03219	1.42946e+08	1.72357e+06	3.37744e+06	6.83008e+06	2.34625e+07	1.11178e+07	2.17914e+06	1.87442e+06	2.04056e+06	1.61472e+06	1.54239e+06	1.57855e+06
C03228	1.15657e+08	1.3618e+08	1.19731e+08	4.98202e+06	5.78563e+06	5.14795e+07	4.03075e+06	4.07206e+06	4.83456e+06	1.62761e+08	1.61717e+08	1.62239e+08
C03232	4.22322e+07	4.93231e+07	3.7925e+07	4.98795e+07	5.25398e+07	5.04624e+07	5.36467e+07	5.57463e+07	5.42091e+07	5.62854e+07	5.38246e+07	5.5055e+07
C03283	1.58652e+06	1.06962e+06	476440	259915	253085	251503	274970	243573	251051	405608	1.04595e+06	725780
C03292	2.04957e+06	1.83424e+06	510982	1.10298e+06	2.38699e+06	943688	798858	3.51257e+06	613145	626287	4.46762e+06	2.54695e+06
C03299	517459	574006	980346	370551	355777	374212	328372	310939	307286	391488	428701	410095
C03373	4.63274e+06	1.86716e+06	3.70813e+06	1.06549e+07	7.7226e+06	8.19981e+07	343098	1.48948e+06	333846	1.03626e+06	1.14645e+06	1.09135e+06
C03406	476132	424234	401689	338895	327229	373723	297339	275238	300672	316495	308047	312271
C03411	656330	394505	2.35328e+06	1.28246e+06	1.23244e+06	5.04533e+06	2.93068e+06	2.33726e+06	1.82937e+06	2.08634e+06	2.4522e+06	2.26927e+06
C03414	4.5753e+06	1.6425e+06	1.16607e+06	2.89476e+06	2.32936e+06	2.79179e+06	880097	773942	828166	1.12392e+06	3.21524e+06	2.16958e+06
C03434	208106	186111	151714	2.77246e+06	3.98251e+06	1.47889e+06	2.95408e+06	5.0294e+06	9.6382e+06	141998	169986	155992
C03470	155527	139395	135612	104505	108697	112458	92604.5	101414	90080.3	102167	103609	102888
C03494	303009	298507	271740	306034	249912	233732	303308	234300	224146	225365	242469	233917
C03495	465449	223481	158176	257321	295883	274381	130303	116849	138555	182912	169370	176141
C03506	1.13501e+06	771514	400738	1.21422e+06	499178	2.53064e+07	392276	1.74212e+06	305171	401698	604093	502896
C03515	1.03847e+07	1.69008e+06	769645	795790	742192	783846	706653	717395	715279	633259	861815	747537
C03526	707949	339915	240586	391386	450039	417334	218523	193519	210743	278210	257612	267911
C03576	320680	301706	346046	234776	230835	236904	227016	224720	223156	265027	240462	252744
C03584	1.13328e+06	297654	578878	1.42035e+06	3.31277e+06	3.72271e+06	436943	318623	797969	333405	248573	290989
C03592	1.43047e+06	1.62582e+06	1.82715e+06	1.20279e+06	1.20058e+06	1.21449e+06	2.01936e+06	1.62904e+06	1.49646e+06	1.74279e+06	1.31783e+06	1.53031e+06
C03626	714112	411876	1.19124e+07	8.86035e+06	6.77873e+06	2.25047e+07	4.51211e+06	1.18405e+07	1.80211e+06	857451	245293	551372
C03657	637818	306242	201751	352614	405457	508945	196875	174349	189866	250650	227935	239293
C03661	179419	157189	110302	194869	184309	225838	156903	158868	150674	124964	138208	131586
C03690	4.02289e+07	1.12981e+08	1.95833e+07	7.63305e+07	6.63737e+07	1.07171e+08	1.3199e+08	1.54187e+08	1.20204e+08	4.01365e+06	9.93344e+07	5.1674e+07
C03691	1.45346e+07	7.54359e+06	5.15625e+06	7.3341e+06	6.01521e+06	6.6709e+06	3.25507e+06	3.0742e+06	3.04978e+06	2.76429e+06	7.24553e+06	5.00491e+06
C03725	2.071e+06	1.17788e+06	1.06712e+06	1.08968e+06	987436	1.18138e+06	719225	672184	688502	1.01402e+06	1.13609e+06	1.07506e+06
C03750	993028	316444	239636	364361	575163	3.42061e+06	180361	171764	184703	257515	246911	252213
C03767	240419	160745	266503	1.72783e+06	1.24013e+06	939250	115070	108821	99050.8	303753	263286	283520
C03837	2.17318e+06	2.54704e+06	510760	411514	2.88345e+06	5.40804e+06	203702	193992	208605	537446	850699	694073
C03840	2.96234e+07	4.63881e+07	1.14655e+08	2.88578e+07	4.23671e+07	7.43006e+07	8.64877e+07	8.85033e+07	9.11629e+07	6.29748e+07	4.77145e+07	5.53446e+07
C03861	884748	915582	4.63178e+06	723351	720148	877944	958107	852703	883590	1.56943e+07	717719	8.20602e+06
C03872	138572	138621	159047	120685	118568	129632	124702	124599	131609	136460	127389	131924
C03882	1.35186e+06	728459	3.33049e+06	737626	679457	1.17613e+06	1.85549e+06	1.6524e+06	1.38361e+06	3.01578e+06	1.15426e+06	2.08502e+06
C03912	1.00815e+09	1.02345e+09	9.12357e+08	4.09012e+08	4.09394e+08	4.38135e+08	3.78515e+08	3.68294e+08	3.56895e+08	4.52877e+08	4.90247e+08	4.71562e+08
C03930	669214	603204	590811	420152	396029	432659	605575	931010	560073	374464	375478	374971
C03943	1.34894e+08	1.19825e+08	8.67168e+07	6.67576e+07	6.40358e+07	2.73045e+08	3.42125e+07	3.09256e+07	2.796e+07	5.36581e+07	5.83653e+07	5.60117e+07
C03954	2.22837e+07	3.41104e+06	1.61901e+06	3.74952e+06	626417	1.2429e+06	318682	212472	286067	814078	1.32197e+06	1.06803e+06
C03958	1.56121e+06	712448	640344	479253	510334	727331	1.00805e+06	424948	1.22839e+06	532713	458670	495691
C03972	891640	1.52114e+06	1.16324e+06	269023	255637	407232	1.0084e+06	397955	859069	368292	757427	562860
C03982	1.12611e+07	1.49274e+07	6.50474e+06	1.10659e+07	1.3112e+07	1.55846e+07	1.70355e+07	1.8829e+07	2.23737e+07	1.15302e+07	1.29129e+07	1.22216e+07
C04006	129500	80297.2	61608	105510	82137	85697.1	70665.4	52588.2	61354.4	68531	94324.9	81427.9
C04015	362083	88061.2	63822.9	102087	693496	185323	405102	148234	71735.5	59765.3	216391	138078
C04020	1.82418e+06	816471	852701	649389	347842	380687	340576	325186	325547	320150	411564	365857
C04022	6.09171e+07	3.82316e+06	1.61583e+07	6.96043e+06	1.12652e+07	1.11727e+07	2.37894e+06	1.20898e+06	1.40218e+06	1.61774e+07	6.91606e+06	1.15468e+07
C04033	1.12183e+08	1.36969e+08	7.26485e+07	1.26084e+08	1.12121e+08	1.0233e+08	1.22233e+08	1.19516e+08	1.22524e+08	7.16327e+07	1.1278e+08	9.22062e+07
C04039	2.94568e+06	3.09532e+06	2.35319e+06	1.19399e+06	1.09162e+06	1.56198e+06	3.23472e+06	3.64623e+06	3.40828e+06	1.02424e+06	1.64196e+06	1.3331e+06
C04067	21167.5	21247.8	24741.3	20328.1	18124.3	18772.8	17426.2	17046.5	18371.4	23196.9	19303.8	21250.4
C04070	58576.2	58998.6	8.75641e+06	53110.7	50008.7	50326.6	50421.8	52551.6	52865.9	4.86188e+06	52587.2	2.45723e+06
C04071	573513	557440	555469	514611	502013	492756	495885	528290	489476	506331	504915	505623
C04084	1.04234e+06	697997	3.62124e+06	535236	555624	694779	577218	549287	553740	3.33393e+06	613359	1.97364e+06
C04100	2.41538e+06	2.36551e+06	2.63108e+06	1.89795e+06	1.79566e+06	4.0232e+06	1.33843e+06	1.23365e+06	1.22203e+06	1.54146e+06	2.13722e+06	1.83934e+06
C04102	7.81542e+07	4.32335e+07	1.02792e+07	3.98963e+07	3.88974e+07	5.05473e+06	2.19183e+07	6.63257e+06	1.49989e+07	1.69941e+07	2.64746e+07	2.17343e+07
C04104	1.09887e+08	1.53539e+08	1.64628e+08	1.19582e+08	1.26542e+08	3.85728e+07	1.96892e+08	1.90855e+08	1.83707e+08	8.55039e+07	8.30058e+07	8.42549e+07
C04114	782363	363085	301069	2.01321e+06	590566	2.3142e+06	337896	396631	291665	182799	694007	438403
C04122	3.7177e+07	1.16708e+07	5.62415e+07	7.13505e+07	6.31271e+07	6.33997e+06	6.92904e+06	1.0317e+07	1.04215e+07	6.41378e+07	5.9871e+07	6.20044e+07
C04144	2.27234e+06	753120	1.84527e+07	1.39237e+06	1.155e+06	1.49327e+06	748492	666148	690277	2.01709e+07	1.75953e+06	1.09652e+07
C04152	2.63462e+06	1.39545e+06	345255	1.22257e+06	7.27515e+06	4.44679e+06	6.09599e+06	2.29858e+06	988601	549447	1.25184e+06	900644
C04164	1.04919e+06	228853	165295	263506	302995	778854	130437	124220	133577	182157	178566	180361
C04166	394363	275783	489650	222422	218107	627097	186452	187130	188631	501586	234187	367886
C04167	1.23628e+06	627463	3.36279e+06	2.66574e+07	2.3287e+07	1.43006e+07	3.66328e+06	8.45453e+06	7.32094e+06	2.52852e+06	2.03499e+06	2.28176e+06
C04181	594906	172878	175081	1.1778e+06	602271	318041	271200	169273	519854	244104	191236	217670
C04185	647439	403219	359872	627033	544364	764236	316500	268018	296682	304442	347022	325732
C04197	351650	302593	321872	479198	2.41275e+06	765295	184603	175803	189046	274974	252718	263846
C04210	543786	513634	572546	401867	364625	401891	570742	417453	420062	419475	382801	401138
C04216	366382	195039	1.64792e+06	134346	137015	160306	118574	121346	123366	1.37126e+06	140415	755835
C04236	172294	158161	148319	111966	115086	119001	100926	111853	109560	118382	116276	117329
C04251	1.48827e+07	2.72445e+06	1.59702e+06	261036	294253	280934	1.17898e+06	259981	228356	1.50601e+06	406989	956497
C04275	2.06089e+07	2.00287e+07	5.02334e+06	1.08014e+07	8.69174e+06	1.00319e+07	5.51799e+06	4.01222e+06	5.33606e+06	4.89835e+06	1.19973e+07	8.44781e+06
C04277	2.9931e+06	6.09786e+06	2.48613e+06	723031	922857	2.00404e+06	734077	770145	688376	1.73629e+06	538292	1.13729e+06
C04282	853165	1.51151e+06	1.39211e+06	764865	632095	1.02993e+07	776169	937664	824666	904624	6.99238e+06	3.9485e+06
C04297	301633	5.95932e+06	1.08961e+07	393026	1.26408e+06	1.02172e+06	1.68068e+07	1.00688e+06	1.24845e+06	3.27849e+06	177499	1.728e+06
C04302	509679	652895	130416	248604	192228	242338	87807.9	73924.3	79309.6	176774	260746	218760
C04308	5.0768e+07	1.54777e+08	2.57889e+07	3.7388e+07	2.45107e+07	6.46452e+07	1.37731e+08	1.2469e+08	1.4443e+08	1.44402e+08	1.02624e+08	1.23513e+08
C04411	287127	312077	283805	198578	212709	217758	226818	222128	197857	208655	209151	208903
C04421	398562	319760	284860	837341	1.23682e+06	628625	238256	254682	217131	218810	201863	210337
C04446	247423	178445	177980	267720	147724	174924	249235	104301	277116	211056	160199	185628
C04454	500819	230009	440250	264618	213861	311215	180541	173243	173264	343822	292266	318044
C04483	2.34432e+08	1.395e+08	6.20617e+10	2.79219e+10	2.78475e+10	3.15589e+10	1.37393e+10	8.10718e+09	1.2571e+10	3.49907e+10	3.14251e+10	3.32079e+10
C04485	72136.6	80176.9	59518.1	78317.5	71518.3	78633.8	67878.9	87047.3	62078.3	55661	61385	58523
C04487	757358	690454	593018	498940	459236	509169	380743	350606	376899	523133	559247	541190
C04500	4.67487e+06	238021	750279	1.58088e+06	1.21281e+06	1.52739e+06	577869	1.31917e+06	605986	1.08134e+06	1.51028e+06	1.29581e+06
C04521	277754	296305	137675	257335	236964	615282	228089	274669	231149	147441	232262	189851
C04529	284512	228259	195456	386170	363923	732796	237554	644681	1.41626e+06	158826	144099	151462
C04534	223150	139740	1.17363e+06	116780	92653	96691.5	60289.4	55891	107867	984298	371652	677975
C04544	3.91063e+07	1.03739e+07	544482	380967	3.93238e+06	2.10525e+07	429428	368413	294676	257603	4.8307e+06	2.54415e+06
C04546	939223	633218	262342	119905	124635	146882	129144	113465	119513	219069	500532	359801
C04556	1.35136e+06	950006	1.18041e+06	833750	810615	1.26911e+06	1.78768e+06	1.71432e+06	1.8803e+06	1.18572e+06	665176	925450
C04584	2.76128e+07	3.30101e+07	2.74004e+07	4.21427e+07	4.47033e+07	4.20834e+07	4.16787e+07	4.04413e+07	4.14862e+07	2.73714e+07	3.92784e+07	3.33249e+07
C04586	197774	148235	140238	142749	119825	236502	333186	278457	511098	168693	141039	154866
C04594	138009	112684	105310	222170	180792	413136	96634.1	92885	75923.5	205910	229970	217940
C04596	779320	601177	268341	4.15495e+06	662002	1.22099e+06	2.54337e+06	509693	662551	219970	474532	347251
C04597	1.12999e+06	3.06656e+06	1.56661e+06	674608	3.01455e+06	574512	1.49925e+06	810078	931465	117935	568579	343257
C04638	1.47344e+06	1.33118e+06	1.2877e+06	922423	945089	996217	942380	948642	992871	1.0989e+06	920405	1.00965e+06
C04663	3.30265e+07	4.83369e+06	7.0378e+07	3.56191e+08	2.08868e+08	8.45496e+06	2.37392e+07	2.82884e+07	4.37702e+07	2.8934e+08	2.17936e+07	1.55567e+08
C04670	102956	341512	99581.4	164846	177747	162722	494543	373165	336188	58567.3	167325	112946
C04671	816892	724627	3.63946e+06	5.10849e+06	4.24682e+06	4.86378e+06	1.78816e+06	983907	1.58685e+06	3.55042e+06	5.65936e+06	4.60489e+06
C04672	236355	196540	5.03431e+06	3.56926e+07	3.36817e+07	3.37734e+07	8.7037e+06	4.78191e+06	7.04946e+06	1.66258e+06	2.75033e+07	1.4583e+07
C04687	4.24554e+06	1.07193e+07	5.83139e+06	1.18727e+07	9.17526e+06	1.18799e+07	4.31858e+07	3.36887e+06	6.61465e+06	4.24936e+06	2.3513e+06	3.30033e+06
C04690	386564	335234	161066	194213	179430	351197	122839	124396	130845	167926	262487	215207
C04692	917063	1.08195e+06	2.30401e+06	492763	931887	820359	833271	812506	863986	695043	556626	625834
C04695	1.64986e+06	885239	6.10912e+06	1.01933e+06	971721	1.09644e+06	659446	695100	669381	7.37205e+06	998394	4.18522e+06
C04751	1.35848e+06	860640	663313	1.15574e+06	1.00337e+06	1.40863e+06	633885	510055	572119	612133	639628	625880
C04771	2.0586e+06	1.50981e+06	915400	1.72382e+06	2.08734e+06	357700	273864	519079	227776	663838	707142	685490
C04796	726200	478552	350973	538750	483994	497433	326447	329639	374370	408903	458341	433622
C04831	190203	84998.4	63461.2	157265	132033	154344	37121.9	30049.6	34416.4	61737.4	149771	105754
C04834	1.0198e+07	2.16466e+07	4.1925e+06	4.63877e+06	6.57812e+06	1.02752e+06	2.70054e+06	2.64864e+06	222801	1.10397e+06	7.0919e+06	4.09794e+06
C04849	571236	230999	2.47873e+06	511788	338490	2.80956e+06	176962	166806	181592	2.55301e+06	248039	1.40053e+06
C04864	558619	198565	105290	91713.2	90901	91133.4	94555.5	98953.1	95226.3	90143	95675	92909
C04883	3.98867e+06	999452	1.37758e+06	940811	1.78086e+06	1.25426e+06	655973	2.2507e+06	671579	1.43571e+06	852319	1.14401e+06
C04908	1.59118e+06	255780	1.70667e+06	460251	2.02478e+06	2.40139e+06	975201	554336	939425	1.48306e+06	978943	1.231e+06
C05021	234818	209464	209105	166739	174885	148707	172352	155031	167632	139522	158883	149203
C05122	2.58847e+06	236468	388240	181175	263858	1.02963e+07	176315	176190	161231	349774	226922	288348
C05130	4.42629e+06	3.9577e+06	582480	550386	3.54458e+06	2.45713e+06	3.07285e+06	3.05629e+06	2.85423e+06	345750	714378	530064
C05131	334023	220115	157658	247803	218024	216725	145490	151621	172195	184020	210022	197021
C05143	1.01381e+06	765190	639134	852321	766141	1.21357e+06	713507	667768	680720	515733	570881	543307
C05146	199833	212225	222170	130823	138067	152527	140307	161347	143393	772921	158582	465752
C05158	1.05898e+06	798729	3.3223e+06	543037	530875	628556	499382	540841	525536	3.32228e+06	611216	1.96675e+06
C05177	7.64467e+06	3.05292e+06	2.55852e+06	5.76223e+06	4.63677e+06	5.55727e+06	1.39698e+06	1.2861e+06	1.50946e+06	2.23726e+06	6.46046e+06	4.34886e+06
C05183	2.39461e+06	1.67706e+06	801269	1.14226e+06	920000	1.07342e+06	397276	288968	418220	781333	1.14469e+06	963012
C05189	2.81419e+07	1.73897e+07	2.05353e+07	1.15957e+07	3.73283e+07	3.48805e+07	1.4949e+07	9.29425e+06	1.59751e+07	6.91646e+06	1.38357e+07	1.03761e+07
C05193	4.86779e+07	5.39064e+07	4.36817e+07	4.12815e+07	3.45138e+07	3.95606e+07	3.21566e+07	2.40769e+07	3.28721e+07	2.30262e+07	3.30761e+07	2.80511e+07
C05203	522634	257460	152565	264132	257008	1.32092e+06	190848	200398	167038	154282	198040	176161
C05230	76499.7	73768	76100.4	60593.8	59801.6	60379.5	66005.6	66013.4	66190.5	69072.4	61613.9	65343.1
C05239	1.1633e+07	9.2108e+06	1.68209e+07	7.08382e+06	1.31697e+07	3.04565e+06	1.78573e+07	1.96812e+07	1.73401e+07	1.27155e+07	1.00981e+07	1.14068e+07
C05243	85147.4	83626.8	46853.5	63701.1	67059	68925.3	62296.2	76855.2	59913.3	55893.1	68223.8	62058.5
C05252	440940	322166	188817	260997	268723	304459	246032	303181	226650	218578	284727	251652
C05270	81370.4	237502	498107	156500	116514	73757.4	75438.9	57136.4	129697	116729	169923	143326
C05282	3.15103e+07	1.03946e+07	1.14039e+07	2.72133e+07	2.92316e+07	3.35411e+07	5.04737e+06	3.043e+06	4.80224e+06	7.68801e+06	1.49604e+07	1.13242e+07
C05293	69620.8	77592.9	195940	59619.6	59998.6	71888.9	72148.6	66075.2	72599.2	917236	58073.5	487655
C05315	2.93266e+06	1.49712e+06	2.68058e+06	1.54953e+06	1.38626e+06	1.82239e+06	1.0572e+06	1.08693e+06	1.02187e+06	2.64971e+06	1.71143e+06	2.18057e+06
C05322	747084	609533	3.04456e+06	2.03939e+06	3.27333e+06	4.06876e+06	1.58944e+06	981000	1.58247e+06	2.97007e+06	4.73429e+06	3.85218e+06
C05328	1.45571e+08	2.00958e+08	1.2911e+08	2.98731e+08	2.04689e+08	1.58174e+08	2.61845e+08	3.36816e+08	2.59434e+08	6.51851e+07	1.34857e+08	1.00021e+08
C05332	4.50484e+09	4.82126e+09	5.16771e+09	4.42003e+09	4.2078e+09	3.94229e+09	6.15688e+09	6.14136e+09	6.06099e+09	4.34567e+09	4.98144e+09	4.66355e+09
C05340	2.07906e+06	400304	1.68779e+06	244415	265150	290238	249943	516219	264052	1.6457e+06	276369	961036
C05345	9.15419e+06	1.6506e+07	2.1789e+06	2.4931e+07	3.47127e+07	1.04782e+07	1.19326e+07	9.62268e+06	5.7427e+06	3.98132e+06	1.06319e+07	7.30662e+06
C05349	414972	244910	507200	284932	212404	270277	1.50772e+06	1.05684e+06	1.10541e+06	474031	222485	348258
C05350	1.27834e+06	1.28371e+06	1.1618e+06	1.11593e+06	1.00242e+06	1.03058e+06	1.01652e+06	978195	1.57734e+06	908390	1.21754e+06	1.06296e+06
C05366	2.09838e+06	1.38505e+06	1.361e+06	1.95701e+06	2.02748e+06	2.38523e+06	1.17046e+06	978654	1.1389e+06	969680	1.1432e+06	1.05644e+06
C05377	2.71701e+06	9.71773e+06	657941	938137	1.21675e+06	1.3138e+06	1.94728e+06	963161	683485	581932	686068	634000
C05381	308115	1.34421e+06	1.08656e+06	97649.4	135460	173065	88356.9	121365	88609.7	1.05137e+06	122167	586767
C05382	1.12686e+06	580766	348231	595732	543271	629332	449999	479005	393857	368754	480351	424552
C05403	1.92852e+06	854822	1.47196e+06	997413	838130	1.08501e+06	653887	620610	648491	1.41223e+06	1.05146e+06	1.23184e+06
C05421	387516	326097	348738	220916	261925	3.22441e+06	276657	267859	246639	228814	248306	238560
C05427	4.34383e+06	1.66856e+06	1.79923e+06	2.60286e+06	1.87652e+06	2.76999e+06	680532	496288	662413	1.53471e+06	3.71915e+06	2.62693e+06
C05430	145965	118628	125413	118562	113346	108310	89412.8	84732.4	123544	724149	107191	415670
C05452	456663	414394	441986	328466	334038	335191	350004	321973	319353	332137	349999	341068
C05464	2.24979e+06	382729	7.66569e+06	728854	1.21193e+06	2.78169e+06	321369	297923	319518	6.5122e+06	921049	3.71662e+06
C05465	2.55502e+06	3.69369e+06	680581	3.29074e+06	1.29617e+06	5.1707e+07	542879	370582	607867	898744	1.6497e+06	1.27422e+06
C05468	6.22342e+08	1.99945e+08	1.97975e+08	3.39583e+07	1.0782e+08	1.41091e+08	2.39938e+07	1.03559e+07	1.60605e+07	1.09231e+07	1.02139e+08	5.6531e+07
C05504	1.22657e+06	216524	1.08798e+06	549954	519469	572735	292773	233623	275102	865492	606673	736082
C05513	2.54757e+08	3.34602e+08	8.11397e+07	838101	1.1835e+08	2.94935e+06	5.67368e+07	524691	610603	3.83762e+07	6.81125e+08	3.59751e+08
C05539	188460	199475	98204.4	184188	169608	180850	161938	194453	160678	110590	163443	137016
C05554	2.12833e+07	1.21197e+07	4.80935e+06	1.11549e+07	8.97619e+06	1.07582e+07	5.69858e+06	4.14353e+06	5.51069e+06	4.81911e+06	1.25066e+07	8.66287e+06
C05557	1.99444e+07	395546	475827	142939	173859	200408	188893	167325	172462	335323	271080	303202
C05562	1.28218e+08	1.49964e+08	1.81226e+08	1.41277e+08	1.50298e+08	1.40937e+08	1.66844e+08	1.67621e+08	1.58657e+08	1.88447e+08	1.43733e+08	1.6609e+08
C05594	291161	158061	111418	182155	153580	200205	82255.9	90229.9	216971	112203	184797	148500
C05595	773979	544105	287730	471672	454631	623278	276633	252924	257052	342149	364894	353521
C05596	1.47067e+06	846206	579958	807607	676946	937574	403379	340836	423122	579257	832533	705895
C05601	4.71534e+06	3.31487e+06	2.73704e+06	3.93563e+06	4.07735e+06	4.7968e+06	2.35385e+06	1.96812e+06	2.29037e+06	2.08449e+06	2.36721e+06	2.22585e+06
C05613	8.87205e+06	5.64281e+06	7.24875e+06	2.70172e+07	2.08422e+07	2.18694e+07	4.26305e+06	4.15021e+06	3.54204e+06	6.05938e+06	1.43868e+07	1.02231e+07
C05619	1.94407e+06	1.19133e+06	785309	1.0744e+06	980333	1.23938e+06	553781	450552	559325	765720	1.16822e+06	966968
C05635	296127	237578	211648	205645	195938	372463	158509	161508	162783	186294	149982	168138
C05643	367038	62122.4	353393	156551	144023	166397	95097.5	68787.8	89357.7	281126	197057	239091
C05648	128175	111380	124748	1.18362e+06	3.58306e+06	1.12375e+06	71546.8	68136.2	73269	105430	89463.2	97446.7
C05660	774198	247469	809061	246429	291933	301029	221256	255146	205830	188771	204334	196553
C05670	216238	345799	570765	155768	156389	165498	191441	163992	164033	338796	166791	252794
C05683	5.63776e+06	276815	2.70976e+06	1.09263e+07	6.24643e+06	9.24061e+06	1.34125e+06	1.07636e+06	1.22302e+06	3.29271e+06	1.56861e+07	9.48943e+06
C05730	1.16194e+06	1.27896e+06	1.27881e+06	1.21315e+06	1.25129e+06	1.2511e+06	1.05131e+06	842159	957120	1.0794e+06	1.22289e+06	1.15115e+06
C05771	753479	890460	364534	635156	551417	774137	510602	522835	629804	325088	351517	338303
C05775	652332	519266	1.08696e+06	3.97857e+07	4.28517e+07	3.11726e+06	633785	898665	2.04229e+06	1.93799e+06	244388	1.09119e+06
C05786	1.20502e+06	144570	231087	119227	103229	832182	88780	92398	90884.3	179208	95727.2	137467
C05790	3.00966e+06	3.03531e+06	1.50443e+06	2.43332e+06	2.56533e+06	2.53556e+06	2.51862e+06	2.30926e+06	2.38502e+06	1.28194e+06	2.37029e+06	1.82612e+06
C05819	352664	1.34663e+06	215351	849861	195653	596767	449276	397136	256239	173054	267077	220065
C05844	911409	943172	2.43321e+07	745149	749846	3.16445e+06	986979	878398	910216	2.65979e+07	739347	1.36686e+07
C05849	2.14561e+06	1.10478e+06	761980	992711	785234	1.18631e+06	414427	305775	394836	655684	855328	755506
C05851	3.5776e+06	2.05614e+06	578468	1.84812e+06	2.11924e+06	1.90274e+07	1.01247e+06	969078	475117	368834	1.56711e+06	967971
C05853	1.16291e+07	1.9483e+06	760631	958618	910816	993008	811106	712738	746064	748667	6.71983e+06	3.73425e+06
C05909	636210	464838	272434	376580	387727	439288	354988	437445	329566	315375	410818	363097
C05913	606708	277224	353195	309413	258478	327467	180470	176472	182722	278441	289464	283952
C05942	409456	445988	368483	235590	281123	328453	289023	494767	647550	373806	262364	318085
C05944	1.75886e+07	1.81618e+07	2.68147e+07	9.98464e+06	1.24528e+07	7.29708e+06	1.72075e+07	1.80763e+07	1.84278e+07	1.86106e+07	1.67352e+07	1.76729e+07
C05945	74570.7	76183.2	76745.7	66695.8	65615.3	64552.7	68917.8	72286.8	69807.8	64757	68505.9	66631.4
C06002	4.28893e+07	4.64063e+07	4.60593e+07	2.47932e+07	2.75742e+07	1.89134e+07	1.17779e+07	1.10899e+07	3.40796e+07	4.09639e+07	4.5016e+07	4.29899e+07
C06044	3.03197e+08	9.52412e+07	3.31551e+08	3.01081e+08	3.11121e+08	8.54265e+08	2.1078e+08	1.54717e+08	2.01608e+08	3.35774e+08	2.95085e+08	3.1543e+08
C06055	3.64679e+07	3.46312e+07	2.45614e+07	4.39836e+07	1.52886e+07	4.30739e+07	3.10509e+07	3.99008e+07	3.94119e+07	3.37657e+07	6.17169e+07	4.77413e+07
C06080	7.17477e+07	3.77328e+07	1.46808e+07	2.83437e+07	2.39278e+07	2.51451e+07	1.67483e+07	1.22311e+07	1.5749e+07	5.6805e+06	2.43418e+07	1.50112e+07
C06082	2.13225e+06	788712	430249	1.0832e+06	817903	940079	582436	423499	563232	467549	974400	720974
C06087	1.41564e+07	4.7619e+06	1.12047e+06	943920	970855	1.33406e+06	678239	645920	632985	820540	1.77316e+06	1.29685e+06
C06145	1.2496e+08	9.61261e+07	9.86136e+07	3.70779e+07	4.6359e+07	3.54095e+07	3.34103e+07	2.65382e+07	4.07523e+07	7.40298e+07	7.29307e+07	7.34802e+07
C06157	3.48785e+07	8.26426e+06	265171	422723	1.12639e+06	2.8983e+06	236019	209014	227616	468335	741024	604680
C06173	1.27776e+06	325967	1.23369e+06	600956	619187	829838	480583	488095	445826	1.1504e+06	843211	996805
C06178	1.91521e+08	1.14003e+08	9.43047e+07	1.6122e+08	1.25085e+08	1.95023e+08	3.14842e+07	2.35099e+07	2.28372e+07	1.35179e+08	1.15811e+08	1.25495e+08
C06195	289641	245173	262094	551254	174568	181867	250326	266577	281298	217172	187336	202254
C06255	3.38453e+07	3.3497e+07	2.01833e+07	2.63754e+07	2.66992e+07	2.44941e+07	2.39288e+07	2.23634e+07	2.34664e+07	2.05277e+07	2.95414e+07	2.50346e+07
C06307	873614	54917.2	509970	2.00105e+06	1.87902e+06	1.32503e+06	869632	207842	721687	1.09368e+06	1.77723e+06	1.43545e+06
C06323	2.48873e+06	191044	370809	901543	1.45223e+06	4.59458e+06	590567	2.2467e+06	9.93669e+06	316889	671341	494115
C06355	591922	548168	1.02092e+06	483943	470327	587370	475690	469681	478522	800490	480175	640333
C06356	2.78374e+06	1.02507e+06	2.26056e+07	1.70573e+06	1.41494e+06	1.82934e+06	775217	715861	800560	2.36771e+07	2.15552e+06	1.29163e+07
C06368	1.11987e+06	491408	736678	878836	421110	2.38604e+06	923313	495412	1.72273e+06	465585	3.33818e+06	1.90188e+06
C06385	975901	663362	344561	414276	429202	1.75334e+06	271966	257209	262391	345387	519410	432398
C06386	1.14787e+06	806953	433681	3.59103e+06	867381	1.11763e+06	525466	422816	474265	507435	541167	524301
C06391	573469	523324	245969	186540	180475	227646	180956	169252	414897	205540	279992	242766
C06448	707260	431452	351763	345673	327212	346349	246184	213447	252195	371431	367497	369464
C06462	2.159e+06	230774	380772	187366	199558	650356	168716	184846	169190	366409	1.11578e+06	741097
C06469	695244	520439	437360	673586	544243	1.87217e+06	1.73292e+06	1.56107e+06	560017	359910	373504	366707
C06475	1.06594e+06	562380	2.47438e+06	622168	3.17956e+06	4.28253e+06	871835	1.44787e+06	979619	1.97593e+06	8.22187e+06	5.0989e+06
C06499	4.06285e+07	4.90056e+06	4.11001e+06	329217	338439	327136	357952	366426	364918	3.524e+06	1.44155e+07	8.96976e+06
C06523	980868	626801	1.68707e+06	2.24551e+07	1.95423e+07	1.83362e+06	1.49837e+06	1.32863e+06	1.47554e+06	966375	7.67877e+06	4.32257e+06
C06533	140661	125319	124737	108652	107690	107966	112466	120933	114602	108358	113346	110852
C06536	190247	162682	153081	233998	205545	194848	137357	107653	99117.9	169096	206535	187815
C06537	475080	419973	665820	304470	304372	336117	305183	732962	924162	309644	331519	320582
C06539	67182.1	65112.8	67572.1	53484.3	52785	53058.4	57397.1	57186.9	58424.4	59180	54035.8	56607.9
C06551	1.96857e+06	1.3839e+06	739147	1.19967e+06	1.18084e+06	1.73751e+06	710929	660324	709879	870233	988264	929249
C06559	2.25368e+07	1.3852e+07	1.56871e+06	1.63024e+07	1.19963e+07	2.50566e+08	3.04302e+06	1.45274e+06	1.13373e+06	6.98807e+06	1.03482e+07	8.66814e+06
C06562	275396	231810	279877	386537	431969	5.07278e+07	148907	147318	161471	221803	193586	207695
C06574	1.06231e+06	827511	712947	955523	2.34322e+06	1.92536e+07	579238	619173	533570	582553	623990	603271
C06575	4.3024e+07	4.11543e+07	1.16193e+06	5.96954e+07	5.50038e+07	6.69662e+07	6.35346e+07	6.16956e+07	3.60682e+07	1.02407e+07	5.86977e+07	3.44692e+07
C06605	8.62584e+06	2.19122e+06	3.50595e+06	372491	366030	363499	377374	392059	378614	3.40104e+06	921739	2.16139e+06
C06627	314939	161349	114508	184255	160329	214719	114127	101069	110064	145300	132132	138716
C06635	959303	947273	876582	743511	769439	760486	722507	721830	727473	709195	751910	730552
C06665	1.23193e+07	219607	572081	363224	439736	612696	435493	382108	412843	403577	327967	365772
C06668	526941	413920	384954	306210	290483	291617	231429	227156	211372	334547	326766	330657
C06678	1.06019e+06	431378	291385	344641	297437	319335	264640	257465	269938	245810	302191	274001
C06691	360267	323710	225781	391292	370086	453475	326580	329853	302549	250923	277517	264220
C06693	654760	611338	363493	2.67944e+06	1.64877e+06	3.23895e+06	362821	616450	331267	393608	1.18683e+06	790220
C06694	2.73243e+08	2.66059e+07	1.36682e+07	1.9206e+07	4.32641e+07	7.41776e+07	1.57007e+08	1.53133e+08	1.52821e+07	1.30414e+07	6.19936e+06	9.62039e+06
C06722	490416	495128	827110	326609	316667	2.18675e+06	343778	333182	322028	667034	1.57066e+06	1.11885e+06
C06725	325949	119338	88898.9	107953	100629	128806	101684	129735	103782	88030.9	108998	98514.4
C06734	196797	180315	164467	127379	130392	150824	151082	205896	118072	122326	199567	160947
C06742	444698	526217	623105	262607	253609	572252	275322	261946	256303	491535	1.26753e+06	879535
C06748	204882	223539	203288	142240	152362	153145	149201	159109	141724	149458	143122	146290
C06756	2.26656e+07	8.71784e+06	6.96495e+07	1.16753e+08	1.32714e+08	1.55733e+08	5.79117e+07	4.86208e+07	5.40806e+07	1.48911e+08	1.4713e+08	1.48021e+08
C06771	5.56157e+07	7.73415e+07	9.70699e+06	1.85485e+08	7.42059e+07	5.93155e+08	1.07317e+06	4.38297e+06	3.17837e+06	2.93288e+07	2.98124e+07	2.95706e+07
C06772	448927	442912	437894	301050	1.94516e+06	1.00193e+06	290631	1.57489e+06	389743	372286	322297	347291
C06773	559739	1.60132e+06	864171	3.45491e+06	3.82741e+06	858002	9.68631e+06	9.13672e+06	9.8102e+06	349968	1.06159e+06	705777
C06804	1.10036e+06	736851	3.94339e+06	565031	586553	733454	609349	590066	584564	3.51951e+06	647502	2.08351e+06
C06805	160264	107555	78747.6	24806.5	42859.4	53832.4	36667.3	35287.5	34736.6	66379.5	85641.5	76010.5
C06807	406670	342609	1.75068e+06	6.1759e+06	7.25397e+07	5.42786e+07	9.02451e+06	3.72227e+06	5.68584e+06	1.68071e+06	3.67496e+06	2.67783e+06
C06812	111888	105460	189535	86095	87273.1	102519	88444.2	87972.7	90031.5	205884	86483.9	146184
C06817	16000.6	16140	16944.1	13841	14321.2	12831.1	15310.9	15073.8	14387.5	15370.3	14653.9	15012.1
C06819	494953	1.35721e+06	1.02011e+06	4.60781e+06	8.49759e+06	2.26495e+07	212703	359729	208946	273656	231704	252680
C06820	1.04229e+06	331409	6.71705e+06	638657	521112	674831	281599	261055	279977	5.70631e+06	664650	3.18548e+06
C06827	166401	151787	120467	131002	130250	483879	105194	96674.2	95965.8	96491.2	108067	102279
C06837	915238	900685	849710	720127	897138	710192	685283	683186	670198	699172	701989	700580
C06861	608460	360548	742490	314248	312377	2.92256e+06	279491	264314	258021	735663	326336	530999
C06869	1.27543e+06	1.69963e+06	671747	6.32157e+06	1.47046e+07	9.46427e+06	7.68354e+06	1.1649e+07	6.59437e+06	8.50696e+07	6.81506e+06	4.59423e+07
C06878	2.85326e+07	2.86884e+07	3.096e+07	2.68821e+07	1.04053e+08	1.14934e+08	2.8745e+07	3.02945e+07	2.97321e+07	1.23832e+08	1.19093e+08	1.21462e+08
C06913	760677	677763	641745	541424	522786	1.16118e+06	475034	476605	480359	505638	505704	505671
C06918	213058	186660	133524	231405	218864	268179	193135	195071	178924	148393	164120	156257
C06924	588811	334173	355464	5.5979e+06	3.38452e+06	5.17797e+06	203869	194151	208776	458548	279092	368820
C06936	205905	404549	231667	893521	482674	1.00457e+06	365099	257591	469334	213230	1.13564e+06	674438
C06948	123459	28907.1	80288.9	97292.1	70971.8	41364.2	100369	54190.9	88593.6	47015.2	64180.5	55597.8
C06956	772753	3.45224e+06	2.28932e+06	2.00944e+06	2.10562e+06	1.93506e+06	2.93988e+06	3.10336e+06	2.90437e+06	765972	2.23349e+06	1.49973e+06
C06958	510253	474576	200242	351652	343359	333755	861909	557989	592071	145734	330803	238268
C06967	313928	274992	398646	194674	207423	463061	185931	198387	199714	332546	214321	273434
C06971	247474	230938	289559	176435	177936	177187	161597	152808	168792	226690	183758	205224
C06996	225640	224477	232834	182768	190929	176335	201937	200956	205866	199937	189304	194620
C07002	1.94448e+07	2.4781e+06	3.18574e+06	1.0564e+07	1.23903e+06	9.12709e+06	378967	387467	401509	811874	2.36698e+06	1.58943e+06
C07007	6.7337e+06	5.49842e+06	3.18335e+06	5.24827e+06	5.50532e+06	5.27399e+06	4.57945e+06	4.70687e+06	4.28068e+06	3.69001e+06	4.97634e+06	4.33318e+06
C07020	3.53251e+06	6.08745e+06	7.79581e+06	2.32818e+06	2.22795e+06	2.32167e+06	1.50006e+06	1.65033e+06	1.0736e+06	2.12698e+06	2.32116e+06	2.22407e+06
C07023	568576	528541	422890	408663	312185	560118	648801	500411	439477	198253	640953	419603
C07040	533761	1.27633e+06	392148	377293	401393	380823	464170	449005	492729	300645	377220	338933
C07045	453757	490184	227537	404291	405802	4.71862e+06	390577	440996	391284	238800	406890	322845
C07073	318789	287468	404818	197688	210635	222210	188809	201459	202806	337695	217639	277667
C07078	232000	270803	121305	221152	220694	564943	202378	222641	198816	125424	202436	163930
C07079	4.18153e+06	1.52567e+06	8.98837e+06	1.22049e+07	2.686e+07	1.3138e+07	4.17722e+07	5.64744e+07	1.63751e+07	7.04266e+06	5.60489e+06	6.32378e+06
C07100	469444	315048	355205	72662.9	125543	119329	107405	103364	101750	256523	250860	253692
C07113	9.52909e+07	1.41711e+08	5.08497e+08	7.80067e+07	7.94798e+07	8.03945e+07	8.48398e+07	9.06356e+07	8.49749e+07	4.08013e+08	8.19216e+07	2.44967e+08
C07115	894206	559846	337842	551698	536390	741612	409344	329378	369457	395297	397530	396414
C07122	965674	939632	923314	1.06051e+06	1.37546e+06	1.55993e+06	794051	663927	772637	657838	775557	716698
C07124	7.92132e+07	339193	5.83926e+06	3.38335e+07	2.10858e+07	3.92426e+07	8.69616e+06	6.92918e+06	1.02326e+07	978433	3.10208e+07	1.59996e+07
C07125	659219	649855	486980	617037	791804	719932	378007	339466	659020	432613	625215	528914
C07127	428126	352002	1.47325e+06	213533	233156	252817	219921	239833	218941	1.43666e+06	241759	839208
C07130	498953	435585	356576	274458	275483	1.0439e+06	265148	310616	265628	177009	386235	281622
C07148	1.80257e+06	5.35139e+06	1.68423e+07	940084	1.67897e+07	5.17705e+06	915501	1.69492e+07	878748	7.67996e+06	3.01887e+06	5.34941e+06
C07153	369810	364855	580467	246565	249024	262772	239412	241769	376485	1.87006e+06	228393	1.04923e+06
C07165	478951	577709	1.17925e+06	824929	408771	667601	393435	859999	398587	1.91923e+06	417413	1.16832e+06
C07172	893949	607656	315627	376306	393160	737384	276629	235610	240357	310396	475792	393094
C07175	1.49887e+06	149849	81280.9	142154	128389	133296	98009.2	129808	88614	76830.1	97916	87373.1
C07178	690012	309874	2.38328e+06	288243	272507	1.53288e+06	213565	214970	218728	3.3315e+06	267162	1.79933e+06
C07180	1.02832e+06	851031	1.02341e+06	709569	662306	717778	609810	605959	565972	718084	718352	718218
C07182	1.22987e+10	7.77329e+09	4.12847e+09	8.36067e+09	6.96335e+09	7.07524e+09	1.95113e+09	1.35499e+09	1.76454e+09	5.47204e+09	6.11212e+09	5.79208e+09
C07184	53353.2	49785.8	56376.8	43443.5	44238.9	46720.3	45590.9	48654.6	45191.8	49278.3	44497.3	46887.8
C07192	854537	901533	765186	878882	1.28404e+06	1.23081e+06	922999	1.94934e+06	1.24319e+06	545176	381431	463303
C07198	1.30285e+06	2.37322e+06	615266	586183	1.11515e+06	5.75579e+06	5.46176e+06	5.0349e+06	5.26949e+06	256870	925420	591145
C07199	5.74111e+06	3.75053e+06	1.87292e+06	2.45285e+06	5.15602e+06	1.85223e+06	1.07784e+06	966214	1.32891e+06	2.2837e+06	7.49717e+06	4.89043e+06
C07241	2.16382e+08	330267	4.76188e+06	1.02234e+08	4.94466e+07	6.30174e+07	5.94475e+07	2.70645e+07	4.8037e+07	1.28198e+07	8.01309e+07	4.64754e+07
C07250	1.30238e+06	124543	536452	974428	845671	904184	505173	304395	484320	959520	1.04712e+06	1.00332e+06
C07254	1.06524e+08	1.38975e+08	2.1763e+07	2.22628e+08	2.9338e+08	2.7699e+08	3.46711e+08	6.20634e+08	3.07903e+08	1.80558e+07	1.3002e+08	7.40381e+07
C07263	8.5744e+07	4.44892e+07	823675	372269	1.23155e+06	1.1702e+06	230332	215762	216108	7.77452e+06	2.27707e+07	1.52726e+07
C07267	52110.8	48143	56231.4	46248.6	44521.6	46494.2	45284.4	46692.3	44876.3	46826.2	44802.8	45814.5
C07272	1.03853e+06	3.68411e+06	580902	4.4804e+06	3.47312e+06	2.75162e+06	1.10291e+06	835595	280489	821532	3.53494e+06	2.17824e+06
C07273	1.08054e+06	919057	2.3652e+06	658494	2.08734e+06	953715	2.2986e+06	1.92372e+06	2.81586e+06	477669	531870	504769
C07280	429494	444191	1.48484e+06	307553	317123	320616	312571	320609	304605	1.5093e+06	320554	914928
C07287	390706	370171	343820	301988	330352	256632	260826	259342	297805	276290	368816	322553
C07289	507200	420947	434034	368224	334386	370610	320518	318494	266625	4.10973e+06	377383	2.24356e+06
C07308	112684	93793.2	622397	1.25798e+06	1.24669e+06	1.09837e+06	2.07067e+06	4.37137e+06	234586	679884	458686	569285
C07309	1.9752e+06	1.13273e+06	305244	405225	380227	773821	240933	234481	235239	1.28958e+06	2.12619e+06	1.70788e+06
C07310	677857	568062	2.46541e+06	363966	877655	1.4903e+06	1.77412e+06	1.33318e+06	1.87317e+06	2.50215e+06	396417	1.44928e+06
C07317	1.57084e+06	836388	2.98725e+06	883835	721168	769586	390381	345954	368204	2.58411e+06	869198	1.72665e+06
C07318	155973	137740	115410	124924	136839	1.50489e+06	120712	149176	116215	109097	117817	113457
C07321	784346	620786	742757	633609	1.54724e+06	797266	460442	2.8786e+06	472260	905323	1.73455e+06	1.31994e+06
C07327	829609	1.1013e+06	2.72248e+06	5.35139e+06	6.59653e+06	2.93789e+06	7.61912e+06	6.69933e+06	7.38263e+06	1.29025e+06	851024	1.07064e+06
C07332	203379	179232	877779	574321	511476	590500	300625	271359	270031	901657	632153	766905
C07339	1.99741e+06	319724	314147	3.65622e+06	850590	1.24811e+06	492794	221373	342643	225188	867442	546315
C07354	3.27492e+06	2.28654e+06	801546	1.48836e+06	1.21853e+06	3.28701e+06	1.01199e+06	647176	1.03966e+06	863041	1.62426e+06	1.24365e+06
C07356	82655.6	61289.4	59730.1	56167	54177.9	84021.2	42225.7	37768.1	37834	48805.8	42234.6	45520.2
C07366	86510.6	86623.4	121939	71129.3	73376.5	82984.6	76700.2	85312.7	70669.6	125578	71285	98431.6
C07369	1.18501e+08	1.1118e+08	7.73923e+06	6.75083e+07	4.69013e+07	7.30583e+07	2.65298e+07	2.39909e+07	2.55246e+07	1.11629e+07	7.11393e+07	4.11511e+07
C07370	1.63111e+07	296582	5.62827e+06	1.00548e+07	7.29379e+06	8.43462e+06	3.30099e+06	1.71063e+06	2.10321e+06	623492	1.35656e+07	7.09455e+06
C07373	1.3476e+07	6.99418e+06	4.0878e+06	6.79994e+06	5.57711e+06	6.18504e+06	3.018e+06	2.43492e+06	2.78729e+06	2.28888e+06	6.71782e+06	4.50335e+06
C07402	1.4999e+06	357554	1.26643e+06	2.5007e+06	1.94767e+06	2.2842e+06	550867	306469	519747	1.27647e+06	2.87088e+06	2.07367e+06
C07404	69574.7	109238	159578	199072	57699.4	66366.6	166062	428946	95221.9	187390	63444.5	125417
C07415	416547	263895	157842	258749	249401	307654	151755	132947	141013	187696	184639	186167
C07422	3.46887e+07	1.26707e+06	6.35009e+06	8.22127e+06	4.15722e+06	4.53909e+06	903515	956966	926124	7.0338e+06	7.70531e+06	7.36955e+06
C07425	1.35866e+06	987377	6.81732e+06	1.37112e+06	6.37058e+06	4.53292e+06	6.74949e+06	6.04204e+06	3.41709e+06	1.18595e+07	1.67851e+06	6.76903e+06
C07427	455273	401487	393405	301150	309683	328879	281397	274978	284551	304372	308461	306417
C07445	1.08079e+06	676660	408334	666812	648309	896352	494755	398104	446546	477777	480476	479127
C07454	222942	184486	101456	156759	166537	165815	139517	121908	139737	71842.2	165667	118755
C07460	596038	472420	443647	469237	457560	760836	1.51206e+06	564658	1.58159e+06	346515	354047	350281
C07461	935931	355822	256934	300458	254616	268539	217048	211163	221393	202109	256109	229109
C07463	1.31017e+07	7.07837e+06	6.94565e+06	7.22799e+06	5.94323e+07	6.40285e+07	4.55927e+06	8.07345e+06	4.14247e+06	5.26782e+06	4.43966e+06	4.85374e+06
C07466	927496	358618	499635	440722	402093	583813	1.06792e+06	1.39185e+06	1.0012e+06	334506	442915	388711
C07467	1.63247e+06	586638	1.87689e+06	2.1299e+06	1.70303e+06	1.82404e+06	435741	417334	433847	2.88633e+06	824915	1.85562e+06
C07469	198400	180241	754375	109339	119387	124896	101834	121966	112108	735636	123792	429714
C07481	1.47123e+06	7.68539e+06	161494	2.2443e+06	4.66074e+06	3.67676e+06	93558	530704	841536	969519	519656	744588
C07482	2.7236e+06	163909	505259	1.07673e+06	839067	988341	358315	249624	355061	729066	1.09425e+06	911659
C07497	3.5724e+06	1.58104e+06	1.01607e+06	1.63495e+06	1.57827e+06	2.13267e+06	1.17198e+06	1.33211e+06	1.0702e+06	1.28929e+06	1.25103e+06	1.27016e+06
C07498	304243	271957	257504	203991	207237	215844	190611	176442	192747	194373	197475	195924
C07499	258852	221394	988444	145923	163866	240658	711287	367836	750998	1.00317e+06	157009	580092
C07501	338939	206009	320170	322953	200615	257022	654752	380230	485343	399062	216665	307863
C07505	291092	266130	377449	416895	489329	425621	227928	242303	144891	165476	255092	210284
C07518	906689	567661	342558	559399	543877	751964	415058	333976	374615	400815	403079	401947
C07519	343572	286038	189055	257293	270459	274357	251367	272141	241752	215884	244421	230152
C07523	1.48251e+06	1.43346e+06	426735	1.85076e+06	1.73253e+06	2.34551e+06	1.24668e+07	1.45271e+06	3.03994e+06	2.0232e+07	2.43107e+06	1.13315e+07
C07544	2.65635e+08	2.39823e+06	4.294e+06	2.79828e+06	2.58204e+06	3.13157e+06	1.8345e+06	1.81959e+06	1.81936e+06	4.24455e+06	8.1178e+06	6.18118e+06
C07545	650066	317147	622461	395717	496574	365662	850411	835876	1.01039e+06	580457	558178	569318
C07546	2.81995e+06	2.69154e+06	2.30545e+06	2.7779e+06	2.8168e+06	2.77065e+06	2.4995e+06	2.165e+06	2.63661e+06	2.64048e+06	2.71397e+06	2.67723e+06
C07550	7.92316e+06	1.20809e+06	2.0833e+06	4.4692e+06	1.01673e+07	1.55788e+07	262577	247136	279206	1.59327e+06	374031	983650
C07565	1.01115e+06	4.46729e+06	6.17083e+06	870821	575442	689332	467139	373001	647197	346700	3.45268e+06	1.89969e+06
C07567	1.12521e+07	348004	2.40161e+06	2.44834e+06	607332	1.94211e+06	259241	273257	250656	2.05305e+06	2.79069e+06	2.42187e+06
C07569	73317.8	62082	60129	35878.3	39986.2	42926.7	50779.9	45406.4	53308.6	35733.1	40990.3	38361.7
C07580	2.26844e+06	2.81132e+06	5.32426e+06	1.23774e+06	1.14014e+06	1.26774e+06	1.18796e+06	835361	887965	5.83176e+06	1.41364e+06	3.6227e+06
C07592	899453	318376	384585	955169	494462	869519	1.01104e+06	1.66245e+06	1.26357e+06	329315	1.83029e+06	1.0798e+06
C07593	667257	422616	570074	517343	652006	3.29264e+06	502697	595643	489140	411394	433264	422329
C07641	8.61351e+06	9.17976e+06	1.24233e+07	2.75525e+07	3.06094e+07	1.26952e+07	1.99027e+07	7.19402e+06	7.02472e+06	1.00222e+07	7.39774e+06	8.70998e+06
C07650	392618	342255	309102	245103	235469	282851	236279	223091	219284	230259	250723	240491
C07653	1.18186e+07	1.04394e+07	5.91328e+07	7.6111e+06	2.21674e+07	2.76092e+06	5.71093e+06	6.17661e+06	8.1441e+06	5.27034e+07	2.44119e+07	3.85577e+07
C07661	343749	159225	248821	164798	147434	183442	386748	579703	469861	200023	195851	197937
C07662	7.28404e+06	370867	1.18616e+06	2.60286e+06	2.36681e+06	2.79823e+06	1.0122e+06	673243	981413	1.70579e+06	2.54453e+06	2.12516e+06
C07670	6.99075e+06	1.65886e+06	98571.3	2.69133e+06	249659	2.83421e+06	2.67175e+06	66179.9	68440	391383	81131.6	236257
C07704	2.97724e+06	2.0787e+06	728688	1.35307e+06	1.10777e+06	1.3246e+06	877675	588349	905357	784594	1.47662e+06	1.13061e+06
C07706	1.57165e+06	6.3156e+06	7.41695e+06	1.41054e+06	1.356e+06	1.76304e+06	1.19208e+06	1.64649e+06	1.72553e+06	2.18615e+06	3.86211e+06	3.02413e+06
C07708	54743.6	55860.7	59123.5	29498.7	30078.6	33589.2	29807.6	29671.5	30162.4	44977.5	36947.8	40962.6
C07734	750105	306826	197184	539288	1.80331e+06	369747	218334	220658	207690	250207	229739	239973
C07756	205466	183965	168505	113494	120845	128610	142306	155229	149392	111156	114871	113014
C07777	216016	203605	393447	167498	168493	197928	171028	171488	173819	528809	166970	347889
C07792	804722	392598	770549	341262	320692	452656	369453	1.01035e+06	277875	718552	411406	564979
C07805	86418.1	39330.4	29392	33445	30454.9	31986.4	27357.1	28677.6	27484.5	24606.5	31269.9	27938.2
C07809	3.0858e+06	198073	3.69979e+06	860679	708766	825532	484549	295532	686279	5.02223e+06	1.91246e+06	3.46734e+06
C07817	416605	376383	354216	260809	260908	272243	250411	257448	254441	278085	254540	266313
C07819	947239	458373	907015	401700	378412	532822	343070	327902	327087	845809	484267	665038
C07844	643281	320410	363894	314000	239250	353804	199270	183753	195776	277902	339222	308562
C07846	2.42624e+06	1.24226e+06	805457	1.18425e+06	911017	1.25863e+06	513693	388236	488497	741812	1.10211e+06	921959
C07852	1.85756e+07	2.28486e+06	315536	720252	675275	749509	572760	476966	237282	264417	591369	427893
C07871	2.89429e+06	4.62068e+06	3.75209e+06	282441	572885	1.98799e+06	2.29991e+06	1.7158e+06	2.15111e+06	498678	1.09531e+07	5.72591e+06
C07872	1.69604e+06	2.21426e+06	1.63922e+06	5.56263e+06	9.75675e+06	6.75443e+06	2.91837e+06	647874	1.46038e+06	1.54115e+06	1.11924e+06	1.33019e+06
C07875	288279	223334	199094	195300	184794	278840	194660	203679	186257	158529	167374	162951
C07890	264336	251276	717797	208947	180839	202852	354725	180501	589802	197736	185203	191470
C07905	60443.9	57399.3	67144.6	51173.6	52234.9	57417.6	54017.4	57720.9	53481.7	59882.4	51221.7	55552.1
C07908	296424	277931	258808	187490	184295	211626	194610	189022	185400	199593	198780	199187
C07919	1.94997e+06	143481	507887	1.17522e+06	1.12462e+06	1.17193e+06	471328	283833	452418	791255	1.06568e+06	928468
C07927	1.17456e+06	552361	409311	524914	1.8518e+06	965417	889243	542272	1.25458e+06	1.02689e+06	1.03608e+06	1.03149e+06
C07956	653446	414228	321737	305205	296178	301712	198520	210607	213540	343169	307502	325336
C07965	650478	548010	2.94723e+06	4.13411e+06	3.43679e+06	3.62168e+06	971893	556096	887941	2.82625e+06	4.5799e+06	3.70308e+06
C07966	356246	317905	414056	540486	457273	985452	332671	296073	306797	1.86627e+06	746982	1.30662e+06
C07967	1.83753e+06	1.62269e+06	2.05122e+06	1.16598e+06	1.1825e+06	1.24234e+06	1.13864e+06	1.76933e+06	2.81968e+06	1.53588e+06	1.14784e+06	1.34186e+06
C07971	1.29232e+06	514459	517554	677940	568450	793151	201541	160294	189082	454000	1.09583e+06	774914
C07973	2.69698e+08	3.63678e+08	3.55731e+08	2.91639e+08	2.66604e+07	2.65943e+08	5.11397e+08	5.8471e+08	5.00907e+08	6.27172e+07	2.02863e+08	1.3279e+08
C07997	2.60659e+07	2.29452e+07	1.07432e+07	2.39465e+07	2.55128e+07	1.19568e+07	1.8428e+07	1.71188e+07	4.75301e+06	9.23492e+06	1.15096e+07	1.03723e+07
C08005	5.45084e+06	1.36127e+06	2.44219e+06	1.91864e+06	770831	2.1982e+06	387952	420160	391838	2.57412e+06	1.12054e+06	1.84733e+06
C08021	3.19753e+07	6.88229e+07	7.2474e+07	4.87119e+07	1.77559e+07	3.88996e+07	4.09585e+07	4.44808e+07	4.83163e+07	5.10021e+07	6.2744e+07	5.68731e+07
C08022	310707	261623	1.23091e+06	896329	913529	993296	717687	592017	763395	1.28972e+06	1.09727e+06	1.1935e+06
C08057	2.59811e+07	2.89678e+07	3.34813e+07	4.00917e+07	3.03707e+07	3.82528e+07	3.63947e+07	4.06314e+07	1.61231e+07	3.9865e+07	3.80075e+07	3.89362e+07
C08092	2.64059e+07	1.18194e+06	5.82703e+06	1.19681e+06	1.10243e+06	1.40639e+06	842808	807737	858601	6.5612e+06	4.80456e+06	5.68288e+06
C08095	1.59908e+06	634726	938782	822413	664523	909031	496598	469058	485669	725463	863710	794586
C08117	263878	209150	186450	167897	170552	256962	182298	180567	174428	148461	156744	152603
C08141	686804	843214	701116	847682	1.13227e+06	530578	1.32634e+06	498133	1.07377e+06	561030	834148	697589
C08148	316474	279415	1.42777e+06	9.12167e+07	6.99301e+07	7.43624e+07	3.25622e+07	1.50552e+07	2.91773e+07	1.37071e+06	1.37643e+08	6.95067e+07
C08157	186342	185335	104658	125348	119304	174949	89463	79651.4	74721.4	105688	136007	120847
C08175	7.76334e+08	1.08672e+08	1.18184e+08	3.59947e+08	9.99053e+07	3.71462e+08	1.06506e+08	8.57059e+07	1.10701e+08	1.1156e+08	3.05215e+08	2.08388e+08
C08183	1.06496e+06	4.99969e+06	541210	2.53493e+06	2.71572e+06	1.79147e+06	1.96333e+06	1.09301e+06	1.06938e+06	518337	1.31855e+06	918444
C08185	66206.4	67894.7	69310.2	62694.3	59612.7	4.83749e+06	62356	62887.8	61383.2	59220.1	60942.4	60081.3
C08186	1.55882e+06	876423	1.68119e+06	1.45092e+06	1.61504e+06	1.64734e+06	1.44363e+06	1.26653e+06	1.42482e+06	1.48987e+06	1.34737e+06	1.41862e+06
C08211	1.61541e+07	3.98203e+06	444983	1.05714e+06	1.22232e+06	2.15588e+06	1.38425e+06	272330	301689	407684	890495	649090
C08233	121472	113720	84226.5	95037.6	94279.9	122743	96897.9	112959	90475.2	83887.3	103867	93877.4
C08234	3.26801e+06	2.35951e+06	3.41025e+06	2.0132e+06	1.96196e+06	2.06184e+06	1.736e+06	1.75733e+06	1.8971e+06	2.57727e+06	1.93597e+06	2.25662e+06
C08257	573927	562282	565213	408211	371410	426718	412972	393159	380554	429738	405895	417817
C08261	1.30403e+07	1.19023e+07	1.10566e+07	1.2606e+07	1.41193e+07	1.13763e+07	1.8938e+07	1.23385e+07	1.85017e+07	2.28085e+06	8.19354e+06	5.23719e+06
C08262	621887	427682	2.96209e+06	2.19284e+06	9.70409e+06	3.224e+06	216901	1.36869e+07	381218	383915	377279	380597
C08272	545097	542720	320545	625364	597272	709798	466394	486316	460933	401014	429884	415449
C08277	465028	449403	1.00493e+06	325763	1.14791e+06	352704	414680	661940	673526	346000	364608	355304
C08278	1.08896e+07	7.92927e+06	8.59579e+06	5.96569e+06	6.6183e+06	7.34275e+06	5.1436e+06	5.41282e+06	5.74525e+06	9.40749e+06	1.87636e+07	1.40856e+07
C08280	284085	195683	298238	584372	133225	237160	115714	119248	117294	306816	220403	263610
C08292	1.2535e+06	957654	513520	1.55312e+06	2.39346e+06	918060	750004	550674	1.07537e+06	1.71838e+06	1.16418e+07	6.68012e+06
C08303	689349	464754	192547	88005.3	91476.4	107805	94786.4	83278.3	87717.2	160787	245961	203374
C08306	8.35602e+08	1.07204e+09	1.10254e+09	7.00131e+08	7.58264e+08	6.96428e+08	9.97071e+08	1.02902e+09	1.03039e+09	7.14953e+08	7.41715e+08	7.28334e+08
C08311	375252	177080	107928	434185	138252	60541.1	44891.4	215775	44226.5	66235.3	53579.6	59907.4
C08313	374988	306471	278298	245016	239787	1.76138e+06	200600	201243	205128	216829	219272	218051
C08322	2.03043e+06	1.4568e+06	688472	2.6978e+06	5.48894e+06	6.67736e+06	3.89972e+06	2.02188e+06	4.20595e+06	807517	4.96059e+06	2.88405e+06
C08325	61754.4	60117.2	103722	50115	48819.4	58040.9	49828.1	48400.8	48007.2	88038.5	48496.9	68267.7
C08338	491716	298882	262361	375747	333079	330133	252774	184798	218536	237545	369016	303280
C08357	7.64805e+07	1.27182e+08	1.09049e+07	4.28175e+07	8.84033e+06	1.71048e+07	2.54195e+07	9.98913e+06	2.58187e+07	7.19935e+07	1.65744e+07	4.4284e+07
C08362	4.62179e+06	1.68995e+06	2.40276e+06	1.57794e+06	1.36871e+06	6.00729e+06	596348	1.53602e+06	850708	1.61598e+06	1.52499e+06	1.57048e+06
C08363	5.92778e+06	3.05467e+06	2.20146e+06	2.64615e+06	2.03769e+06	1.9822e+07	1.04265e+06	786080	1.02742e+06	1.88447e+06	2.25871e+06	2.07159e+06
C08369	926878	797489	529899	506102	580861	424646	642156	3.3962e+06	3.3768e+06	834693	493830	664262
C08370	5.31396e+06	2.97566e+07	7.27216e+06	1.09147e+06	5.79576e+06	807958	5.96245e+06	834125	1.20184e+06	409968	1.0572e+06	733581
C08401	1.21902e+07	1.30879e+06	369565	210983	198097	199673	213986	211766	215389	200230	2.08511e+06	1.14267e+06
C08402	181425	146884	116033	139200	147066	242079	135381	93968.3	123140	98998.6	109585	104292
C08415	648982	185397	190175	160735	165139	162452	170257	174742	166336	164756	165912	165334
C08430	522128	466943	380642	492520	453726	1.61576e+06	443243	508638	406076	359819	426486	393152
C08433	3.2396e+07	274049	7.27051e+06	1.00548e+07	6.9183e+06	8.24523e+06	3.54636e+06	1.71063e+06	2.07297e+06	802850	1.80479e+07	9.42539e+06
C08437	1.15872e+06	565305	1.10952e+06	600322	503637	717195	437585	412281	419416	1.03465e+06	708376	871512
C08441	1.41703e+06	1.52934e+06	906757	1.18214e+06	1.05753e+06	1.16844e+06	1.01674e+06	913225	986897	838055	1.13471e+06	986384
C08449	5.7283e+06	2.76834e+06	598524	802794	752324	835568	581082	535894	901689	649382	928407	788894
C08451	2.3404e+07	1.04604e+06	785052	1.11748e+07	1.94443e+07	4.82632e+06	2.0963e+06	1.36531e+06	7.42046e+06	836807	3.45051e+06	2.14366e+06
C08456	7.0909e+07	7.32547e+07	7.11905e+07	1.09906e+08	1.14819e+08	1.07367e+08	9.41147e+07	9.61258e+07	9.37001e+07	1.03366e+08	1.17269e+08	1.10317e+08
C08491	8.90515e+06	1.07573e+07	1.92981e+07	4.10202e+06	5.99732e+06	6.53644e+06	1.59736e+06	521397	1.19189e+06	1.16558e+07	786232	6.22104e+06
C08497	9.48421e+06	1.10055e+07	2.04981e+07	9.20112e+06	1.00728e+07	5.32257e+06	7.22386e+06	7.41004e+06	7.66744e+06	2.38942e+07	1.54625e+07	1.96783e+07
C08512	5.87088e+06	2.59827e+06	1.9604e+06	4.42875e+06	3.42743e+06	3.24395e+06	1.92603e+06	2.18919e+06	1.75877e+06	2.11881e+06	2.05594e+06	2.08737e+06
C08536	2.75674e+06	1.37001e+06	140421	935768	3.65217e+06	2.79228e+06	671783	2.05513e+06	460790	78808.2	836253	457531
C08560	42508.1	43458.7	47889.6	37281.3	36656	36268.9	40908.9	40619.2	42342.9	40322.6	38129.2	39225.9
C08567	280541	276098	244840	190467	182298	208542	224060	204064	196938	205173	188016	196594
C08570	8.57383e+07	3.91422e+06	8.34249e+07	8.91716e+06	1.16972e+07	4.06584e+06	2.51758e+07	4.33258e+07	1.46789e+07	2.98218e+07	2.22428e+07	2.60323e+07
C08579	87486.4	82974.4	81416.1	69391.5	73242.2	193355	72291	76846.5	79106.3	72989.2	72730.9	72860.1
C08580	2.32204e+07	1.18496e+06	6.64993e+06	1.58791e+07	1.23674e+07	1.28264e+07	4.30258e+06	2.59254e+06	4.12498e+06	9.47137e+06	1.82296e+07	1.38505e+07
C08582	1.64058e+06	1.38967e+06	2.8883e+07	3.50538e+07	6.66689e+07	6.56224e+07	6.4064e+08	2.30798e+08	6.09845e+08	2.22353e+07	2.9176e+07	2.57056e+07
C08588	1.7199e+06	863080	208981	698869	582206	697466	326512	271380	323262	116417	750513	433465
C08592	490530	269599	181806	245511	198699	273728	118758	80543.2	111484	163480	236307	199893
C08607	3.00074e+07	2.38197e+07	1.21355e+06	1.66777e+06	1.38805e+06	2.09626e+06	1.25481e+06	1.32206e+06	1.12359e+06	2.73399e+06	4.29444e+06	3.51421e+06
C08610	1.85626e+06	1.41633e+06	1.27451e+06	880518	858087	979354	690869	677501	621003	838929	914043	876486
C08613	416550	337727	372951	237468	250885	290303	297386	287928	246688	255601	266910	261256
C08617	2.56633e+09	3.36902e+09	2.11237e+09	2.39115e+09	2.57673e+09	2.44619e+09	2.07714e+09	1.75266e+09	1.97713e+09	2.98702e+09	2.17509e+09	2.58105e+09
C08630	501059	410784	318107	371070	360186	290539	326201	379281	291407	383497	291395	337446
C08659	284958	251589	1.28558e+06	1.89794e+06	1.57781e+06	1.61556e+06	446191	252895	400150	1.2342e+06	2.10261e+06	1.6684e+06
C08661	65763	63338	64218.2	53280.5	54277.6	622505	58028.2	58419.4	57236.4	58253.5	55538.3	56895.9
C08668	2.19373e+06	324212	1.62908e+06	893972	777826	5.90766e+06	467686	349816	411925	1.3223e+06	971184	1.14674e+06
C08671	5.6358e+08	4.3838e+08	2.85316e+08	4.87483e+08	4.00884e+08	4.58456e+08	8.38284e+08	7.51055e+08	5.94042e+08	2.97426e+08	4.62602e+08	3.80014e+08
C08673	76256.7	65157.4	63362.9	57991.8	57118	57457.2	59960.6	65265.1	61668	59807.5	60142.7	59975.1
C08675	360084	273420	1.14665e+06	1.26227e+06	1.28251e+06	3.61687e+06	591144	452934	694598	1.24006e+06	1.34771e+06	1.29388e+06
C08684	87753.4	84029.7	118288	69733.4	70766.8	85702.9	66312.8	68002	67577.6	124130	67015.5	95572.9
C08688	235801	174416	248551	151179	151281	174614	131309	134254	139120	214592	165523	190058
C08692	3.13806e+06	187659	664268	1.53707e+06	1.4709e+06	1.53278e+06	616453	371227	591720	1.03489e+06	1.39381e+06	1.21435e+06
C08694	273383	145341	282102	123774	107055	163957	107897	95055	101243	241081	137129	189105
C08702	1.43049e+06	365292	346624	1.78586e+06	1.14261e+06	1.01314e+06	557946	197355	278226	361685	2.271e+06	1.31634e+06
C08706	309083	66306.2	67837.5	54349.4	56008.3	52557.1	59637.8	59864.6	61728.3	81248.4	55585.5	68416.9
C08719	1.48917e+06	1.1232e+06	4.8372e+06	763637	778608	2.67554e+07	808867	769727	739026	4.6719e+06	859512	2.76571e+06
C08726	3.67205e+06	2.82069e+06	2.29445e+06	3.10408e+06	2.66313e+06	4.19946e+06	2.25485e+06	2.1103e+06	2.15124e+06	2.01316e+06	2.08319e+06	2.04818e+06
C08737	958686	3.15185e+06	793226	5.6976e+06	5.37152e+06	2.01965e+06	2.37767e+06	2.51349e+06	2.22022e+06	592852	1.67221e+06	1.13253e+06
C08750	1.56649e+07	173297	1.80831e+06	492405	632759	1.70921e+06	1.29782e+06	715123	1.05634e+06	1.85095e+06	453792	1.15237e+06
C08752	2.34175e+06	2.73351e+06	8.54083e+06	1.19883e+07	9.96615e+06	1.1414e+07	5.7589e+06	4.3276e+06	6.08041e+06	8.33188e+06	1.3281e+07	1.08064e+07
C08756	2.73804e+06	1.26816e+06	1.15569e+06	845146	895018	1.27558e+06	311038	228372	311598	943291	804409	873850
C08773	1.2273e+06	1.13801e+06	5.00489e+06	7.02039e+06	5.83623e+06	6.6841e+06	2.61111e+06	1.61157e+06	2.59967e+06	4.87919e+06	7.77743e+06	6.32831e+06
C08775	1.53672e+06	493185	702809	712666	633494	603642	384238	379621	380586	707868	468038	587953
C08776	743159	483839	350593	531332	489901	578996	277958	253580	266457	411688	553036	482362
C08778	162179	69369.9	776532	71317	66107.2	84180.8	57009.8	53014.5	56969.9	794843	74953	434898
C08782	387302	346367	282351	323159	336563	616667	295322	467212	284319	266905	316357	291631
C08794	751557	523765	327747	355747	337912	395378	270047	250537	265495	369485	358050	363768
C08798	2.43824e+06	3.17117e+06	593464	1.1731e+06	856691	1.20673e+06	466082	318158	521875	895247	1.41633e+06	1.15579e+06
C08804	2.0522e+06	1.47157e+06	7.39589e+06	1.03743e+07	8.62439e+06	9.87732e+06	3.682e+06	3.03726e+06	3.91649e+06	7.21015e+06	1.1493e+07	9.35156e+06
C08807	244615	186322	4.56519e+06	169488	194652	1.4701e+06	158200	141855	161673	4.99028e+06	255872	2.62308e+06
C08809	592733	286826	567563	251363	236212	347906	214675	205184	204674	529263	303029	416146
C08810	4.67928e+06	146901	1.77965e+06	8.27806e+06	5.13641e+06	5.60662e+06	2.78677e+06	2.00627e+06	2.1966e+06	153929	1.01737e+07	5.16379e+06
C08848	6.07927e+06	2.00359e+06	3.41298e+06	7.75748e+06	6.06099e+06	5.81031e+06	6.48707e+06	2.39745e+06	6.22769e+06	2.97334e+06	7.32503e+06	5.14918e+06
C08849	369813	328212	327283	296788	279596	306440	301012	314897	302986	288565	310953	299759
C08853	201520	188429	299688	158327	151115	195225	170850	168692	171868	243486	165284	204385
C08855	201013	63914.7	1.0572e+06	1.06738e+06	918423	223272	54308.4	50346.4	51610	886651	95440.7	491046
C08858	58389.8	31770.3	32720.4	13724.2	16693	15996.9	18136.4	16065.5	16558.8	22413.9	23106.9	22760.4
C08861	8.48033e+06	9.5503e+06	1.50194e+06	4.06599e+06	945991	2.04989e+06	1.42171e+07	5.63977e+06	5.91146e+06	1.3278e+06	1.87092e+06	1.59936e+06
C08862	376929	218671	424432	224634	194817	2.07304e+06	142270	159093	152324	396006	206315	301160
C08878	302349	204325	371317	153660	169753	183160	145117	145644	126779	356587	190932	273759
C08879	540805	331671	271403	274637	267732	267233	258476	270022	256411	231396	271092	251244
C08897	406323	820594	384760	189119	154450	438115	380449	398384	212452	328812	200909	264861
C08898	1.21369e+08	1.23875e+08	4.66275e+07	5.80469e+07	6.57729e+07	6.41794e+07	8.07162e+07	7.84991e+07	7.58838e+07	5.28456e+07	6.074e+07	5.67928e+07
C08899	7.36189e+06	6.38845e+06	1.36572e+06	2.91041e+06	2.268e+06	2.67149e+06	968526	674735	959731	1.97067e+06	2.95777e+06	2.46422e+06
C08953	1.68148e+06	3.01609e+07	1.21329e+07	3.6572e+06	142918	1.02717e+06	370784	324153	3.28339e+06	231128	372426	301777
C08954	1.3842e+06	392046	367304	4.21084e+06	3.04418e+06	2.11638e+06	691238	194487	242471	326294	4.1145e+06	2.2204e+06
C08966	8.38398e+06	3.56908e+06	719766	1.76169e+06	1.83678e+06	1.813e+06	542781	516681	509302	1.50346e+06	1.32365e+06	1.41355e+06
C08968	144107	137481	184673	114523	116212	189374	115720	111672	110975	203845	116912	160378
C08972	5.06259e+06	8.83817e+06	5.09488e+08	2.0411e+06	1.766e+06	1.8299e+06	1.73232e+06	2.64823e+06	1.61087e+06	4.93438e+08	2.71662e+06	2.48077e+08
C08975	7.08606e+06	386802	380971	307389	384718	351358	308909	261070	298890	329226	320955	325090
C08992	360304	947295	283183	344993	294501	421584	994247	248500	580242	429207	862181	645694
C08994	564246	371998	354953	474367	441696	2.01051e+06	397109	283485	357029	292096	298931	295513
C08996	83722.1	81370.4	81755.4	67830.8	70412.1	65435	73875.1	74373	72907.9	74161.8	70705.2	72433.5
C08998	710675	641096	3.37449e+06	4.73341e+06	3.93501e+06	4.02916e+06	1.11279e+06	636712	997962	3.23597e+06	4.78661e+06	4.01129e+06
C09000	2.50245e+08	9.66554e+07	1.65023e+06	2.69484e+06	2.53478e+07	1.5357e+07	1.99949e+06	1.60889e+06	1.80466e+06	9.35959e+06	7.15629e+07	4.04612e+07
C09010	1.03768e+06	271898	289222	430588	465731	343538	165877	157970	169870	244434	227082	235758
C09016	3.0297e+07	7.38933e+06	856550	1.35545e+06	2.57615e+06	1.9837e+06	1.12118e+06	1.33081e+06	1.02476e+06	1.53798e+06	3.65355e+06	2.59577e+06
C09018	346137	1.43444e+06	1.10224e+06	1.21338e+06	1.23283e+06	1.27081e+06	568246	410186	558746	1.19203e+06	1.2955e+06	1.24376e+06
C09020	1.7184e+07	7.12842e+07	7.28651e+06	3.01739e+07	3.97034e+07	1.11106e+07	4.91314e+06	3.69204e+06	5.18744e+06	7.10825e+06	1.15042e+07	9.30624e+06
C09038	359816	319176	1.60307e+06	866113	1.72353e+06	2.45416e+06	674031	372103	659145	1.56385e+06	2.49278e+06	2.02831e+06
C09055	1.36354e+06	1.05058e+06	839304	1.03279e+06	945426	992932	804652	849786	812134	813000	992746	902873
C09056	302441	178769	137936	235092	171858	199305	147856	110032	128374	143390	200847	172118
C09078	1.94009e+06	2.64614e+06	1.95894e+06	1.52742e+06	1.3661e+06	1.62976e+06	2.11541e+06	2.05804e+06	1.81125e+06	1.97386e+06	2.20271e+06	2.08828e+06
C09086	912194	835997	506408	636526	620008	643441	552133	400627	501573	548364	654899	601632
C09106	3.20101e+06	3.37129e+06	448854	1.75704e+07	2.40328e+07	2.66685e+07	8.23409e+06	9.12904e+06	2.47865e+06	2.80086e+06	2.33493e+06	2.5679e+06
C09130	921059	660734	313006	415529	410890	805908	257098	240836	241221	385146	471842	428494
C09160	3.33499e+06	373281	1.68406e+06	1.2462e+06	1.33449e+06	1.48554e+06	1.12902e+06	1.96443e+06	1.54452e+06	1.63113e+06	1.19801e+06	1.41457e+06
C09162	179479	159289	157405	144038	135241	140750	145107	144572	147046	136697	147522	142109
C09164	5.89004e+06	4.76086e+06	4.11669e+06	5.78127e+06	5.31172e+06	5.57664e+06	3.3936e+06	2.86965e+06	3.19189e+06	4.24062e+06	5.49751e+06	4.86906e+06
C09167	818005	537244	934951	1.02929e+06	655996	665931	1.99555e+06	1.18149e+06	1.27811e+06	947771	946566	947169
C09180	1.86441e+06	1.56242e+06	7.24161e+06	1.01579e+07	8.44449e+06	9.67128e+06	4.87961e+06	6.79583e+06	5.15204e+06	7.05974e+06	1.12532e+07	9.15648e+06
C09210	1.10232e+06	634261	413192	605330	502214	702745	302347	253423	317145	434173	624013	529093
C09211	4.14786e+06	4.37298e+06	1.10905e+07	1.31659e+07	1.61338e+07	1.64396e+07	2.278e+07	2.8294e+07	2.16375e+07	2.49362e+07	5.43536e+06	1.51858e+07
C09229	357492	534613	307928	570744	1.14695e+06	637024	699935	675467	565849	358270	402976	380623
C09241	358461	295101	257532	319348	271747	394850	198327	198223	191763	211905	206766	209335
C09246	321413	300533	540244	265357	254424	315845	272496	269054	274119	434879	263618	349249
C09249	1.78885e+06	111801	64823.5	2.87628e+06	974881	512948	466969	133203	142954	59869.7	133595	96732.2
C09250	1.03311e+06	393341	9.63752e+06	690159	603236	778523	363982	341312	349531	1.05349e+07	918971	5.72695e+06
C09258	2.84841e+06	200649	502653	1.03239e+06	781153	975539	395993	232395	369294	691796	1.01873e+06	855261
C09264	909531	402531	255507	416257	401825	495241	298385	313316	272473	300974	301399	301187
C09275	2.58905e+06	1.53981e+06	832684	1.28241e+07	3.73753e+06	1.01274e+07	764074	3.1287e+06	3.36082e+06	776494	8.47823e+06	4.62736e+06
C09280	367924	384102	198268	340691	344941	364277	300141	359677	303656	229484	308385	268935
C09281	3.34379e+07	1.18598e+08	1.55089e+08	1.75796e+08	1.87166e+08	2.5978e+08	1.86893e+08	1.92466e+08	2.06618e+08	2.01104e+08	1.47703e+08	1.74403e+08
C09286	1.89098e+06	957898	254845	813965	678321	786452	344694	289810	347119	122729	890423	506576
C09296	5.1368e+06	2.6021e+06	744490	2.24036e+06	1.87221e+06	2.215e+06	3.2689e+06	2.69229e+06	942939	335831	2.43917e+06	1.3875e+06
C09311	3.96093e+07	572574	469220	574644	1.96479e+06	1.5501e+06	515944	622458	497938	441217	522965	482091
C09313	696992	824759	1.12404e+06	411593	397491	493209	431522	418222	404221	868323	1.98665e+06	1.42749e+06
C09347	427215	253244	153390	227749	218052	277895	200780	218134	178162	171817	223814	197815
C09360	276546	214244	183152	190036	200246	278817	200358	195389	178676	145551	160562	153056
C09362	2.76586e+06	6.47229e+06	2.70327e+06	1.72769e+06	4.52221e+06	1.27434e+07	1.17406e+07	1.40369e+07	1.6921e+07	337740	7.04636e+06	3.69205e+06
C09364	496567	429618	345314	422899	500989	6.26204e+06	450651	442250	420604	340104	350660	345382
C09382	1.29422e+06	2.33952e+06	5.84914e+06	1.2235e+06	1.30885e+06	1.28321e+06	1.18967e+06	1.29624e+06	1.25574e+06	7.2867e+06	1.31445e+06	4.30058e+06
C09417	140474	136714	156618	120968	119275	131835	127533	131802	123374	605901	123966	364934
C09420	1.73681e+06	1.47118e+06	6.74151e+06	9.46266e+06	7.86656e+06	9.00938e+06	1.13034e+07	5.78802e+06	1.62511e+07	6.57658e+06	1.04831e+07	8.52982e+06
C09421	2.99286e+06	5.02432e+06	8.25982e+06	1.89356e+06	1.56364e+06	1.75866e+06	696575	506262	1.73049e+06	1.37003e+06	4.19335e+06	2.78169e+06
C09441	1.11851e+07	569490	2.02074e+06	4.30889e+06	4.1234e+06	4.29686e+06	1.94475e+06	1.15976e+06	1.76888e+06	3.49086e+06	4.04342e+06	3.76714e+06
C09469	1.45091e+07	586948	8.60748e+06	1.4371e+07	1.10727e+07	1.09453e+07	1.76374e+07	1.71692e+07	1.52166e+07	626889	1.15696e+07	6.09826e+06
C09478	1.09897e+06	468186	492358	546155	438290	597146	163579	129627	155973	430696	705859	568277
C09529	173249	149080	120839	236088	255357	227087	90949.1	86613.6	93138.3	129855	118273	124064
C09563	1.73703e+06	267934	1.92378e+06	327996	627629	1.18483e+06	1.8002e+06	1.88079e+07	1.62741e+06	1.97027e+06	758701	1.36449e+06
C09570	1.47532e+07	5.37786e+06	7.33702e+06	1.37947e+07	8.42202e+06	1.29726e+07	8.12556e+06	2.37333e+06	7.44494e+06	8.127e+06	1.80288e+07	1.30779e+07
C09575	440889	123507	14011.5	4483.67	4109.52	4227.53	4104.96	4205.52	4199.55	11659.2	26672.8	19166
C09591	602756	362972	526381	477692	602035	797542	464169	388104	451651	372816	400058	386437
C09593	643194	206369	240393	163096	160358	164574	157704	156110	155023	184110	167045	175578
C09622	4.93237e+06	2.55996e+06	1.15147e+06	2.37549e+06	1.9656e+06	2.23822e+06	994167	1.34326e+06	1.02018e+06	933124	2.45881e+06	1.69597e+06
C09627	1.07459e+07	276754	3.75054e+07	1.10771e+08	1.06503e+07	9.93351e+06	3.09799e+06	1.99797e+06	4.92473e+06	2.887e+07	1.4183e+08	8.53502e+07
C09654	1.69173e+06	643162	464417	543089	460228	485394	392322	381685	400176	365319	462926	414122
C09661	126249	120433	148779	103218	101802	124440	101371	96402.4	97213.7	166524	102415	134469
C09675	506121	405432	1.69688e+06	2.96269e+07	2.87562e+07	2.6451e+07	5.32213e+06	1.25536e+06	4.21812e+06	1.65473e+06	3.28479e+07	1.72513e+07
C09680	1.06612e+06	511886	508702	757348	819159	632438	298461	277848	317362	434583	399407	416995
C09707	2.0353e+06	327171	2.18303e+06	1.69637e+06	1.56961e+07	1.49435e+07	1.83343e+06	898480	1.72602e+06	2.08965e+06	1.25218e+06	1.67091e+06
C09715	2.2249e+06	2.37322e+06	721072	1.42389e+06	1.39889e+06	5.42899e+06	5.58204e+06	5.06092e+06	4.67729e+06	568815	1.46682e+06	1.01782e+06
C09724	2.66742e+06	411778	1.08557e+07	295962	271707	308450	299414	285049	275910	1.2447e+07	304514	6.37576e+06
C09766	3.05604e+06	2.2731e+06	4.36317e+06	2.00959e+07	1.49267e+07	1.97364e+06	1.17609e+06	160914	1.28241e+06	9.38141e+06	968939	5.17517e+06
C09780	7.03335e+06	3.62439e+06	2.34614e+06	3.13968e+06	2.41773e+06	3.65266e+06	1.27602e+06	962636	1.35002e+06	2.1334e+06	2.69893e+06	2.41617e+06
C09795	1.00643e+08	2.21936e+08	1.80655e+08	1.67076e+08	1.58896e+08	1.67018e+08	1.85555e+08	1.45535e+08	1.67479e+08	9.52084e+07	1.27672e+08	1.1144e+08
C09801	3.46879e+06	3.74893e+06	1.84451e+06	2.80454e+06	2.74194e+06	2.80879e+06	2.73481e+06	2.65212e+06	2.7436e+06	1.60443e+06	2.57477e+06	2.0896e+06
C09808	1.19545e+06	751332	583571	579279	537211	594168	412556	382001	401171	622445	615853	619149
C09815	672452	472732	808457	373010	317248	541519	517881	1.55581e+06	1.86889e+06	292952	317029	304990
C09829	1.01846e+06	1.14446e+06	271287	509029	384117	484248	315793	635868	473627	353236	657589	505413
C09866	4.84756e+07	894502	2.31572e+07	4.00125e+06	8.27153e+06	1.68243e+07	8.65315e+06	2.92112e+06	6.56704e+06	1.70357e+07	2.09779e+07	1.90068e+07
C09870	1.75799e+06	1.3059e+06	2.24388e+06	2.86159e+06	2.41249e+06	2.99873e+06	943467	520847	922631	2.18898e+06	3.48923e+06	2.83911e+06
C09874	205725	206762	106170	149305	145021	158737	106546	98894.8	98783.2	128526	359978	244252
C09910	1.71116e+06	1.19367e+06	1.52238e+07	2.09079e+06	338827	554093	1.4182e+06	6.05179e+06	1.87947e+06	1.09144e+06	2.59184e+06	1.84164e+06
C09916	7.38146e+08	2.24923e+08	1.03941e+07	1.9815e+08	2.31845e+07	1.22595e+08	1.64622e+07	6.27519e+06	1.85679e+07	2.50228e+07	7.33488e+07	4.91858e+07
C09926	171298	138684	110718	144468	133398	2.83352e+06	124105	119209	112387	84988.1	103467	94227.8
C09929	83528.8	70681.1	70268.5	63359	62666.1	3.05719e+06	68120.3	67191.3	69218.6	62880.4	71038.7	66959.5
C09930	742960	356725	252484	410742	472295	437973	229329	203090	221165	291969	270352	281160
C09940	381386	36471	141352	267092	247644	260114	138813	82781.7	126260	249172	269252	259212
C09948	444452	246309	842741	1.64259e+07	1.28608e+07	1.37645e+07	4.2462e+06	2.79601e+06	1.44232e+06	886258	2.10948e+07	1.09905e+07
C09951	877509	928910	747383	797776	800166	4.35186e+06	814494	1.048e+06	800353	718578	778662	748620
C09953	354163	306413	246286	301621	369249	1.8422e+07	321414	315423	299984	242570	250098	246334
C09954	598773	541980	356847	650336	615092	753686	523630	498810	502210	411316	461240	436278
C09955	7.19072e+06	1.26663e+06	1.16811e+06	934111	1.00786e+06	1.00941e+06	929863	934316	919777	908870	996663	952767
C09956	251717	269116	130215	244784	236228	262281	209116	225162	201193	176225	207333	191779
C09978	349795	1.27018e+06	1.04356e+06	293063	164739	110958	391895	233590	434323	861046	111470	486258
C09983	769484	345171	367163	1.02993e+06	2.32388e+06	436117	210579	200541	243466	310306	288278	299292
C09996	66766	72229.4	69434.7	61154.5	60452.3	1.3872e+06	63581.6	62381.5	65097.7	61833.3	61950.1	61891.7
C09999	1.81922e+06	1.50633e+06	1.33715e+06	1.87783e+06	1.72531e+06	1.80024e+06	1.15692e+06	954430	1.03676e+06	1.37741e+06	1.78566e+06	1.58153e+06
C10004	269269	251453	1.35233e+06	1.6175e+06	1.45141e+06	1.29125e+06	359194	255163	372309	1.22338e+06	1.69306e+06	1.45822e+06
C10007	56283.5	51210.9	54392.2	46563.3	46282.2	149373	49537.5	47644.8	48051.9	46710.2	46623.7	46666.9
C10009	510936	499081	442863	346057	366548	383554	399141	386414	392964	323090	332134	327612
C10015	879080	278782	1.19194e+06	1.25766e+06	1.21695e+06	5.1787e+06	1.78131e+06	1.29924e+06	1.54577e+06	1.21819e+06	1.06203e+06	1.14011e+06
C10053	583629	258296	163954	264991	257843	273254	191468	201049	174841	160955	193402	177179
C10072	145012	69966.5	79291.9	213712	60261.5	78631.9	146099	131394	72053.9	66345.7	62048.9	64197.3
C10074	263919	235152	222436	176384	181382	195585	164815	152564	166662	165320	170750	168035
C10080	1.75437e+06	903371	221771	715407	603839	700806	353657	284151	330431	124313	727951	426132
C10094	8.83871e+06	1.13086e+07	611578	1.09067e+07	8.63399e+06	8.55187e+06	1.04803e+07	1.05474e+07	1.03425e+07	6.74994e+06	8.60009e+06	7.67501e+06
C10129	8.72955e+06	1.6905e+06	1.61511e+06	8.34471e+06	8.27993e+06	1.01972e+06	703198	1.05614e+06	609212	272210	1.12822e+06	700213
C10138	799746	733159	961658	584702	992622	765387	811244	4.04884e+06	580652	3.69723e+06	647360	2.17229e+06
C10139	791752	267500	460982	354531	329842	404006	251690	220516	228046	387502	437753	412627
C10166	759843	437206	284819	404292	346183	477313	208412	174688	218613	295420	430142	362781
C10172	641846	1.1368e+06	5.5606e+06	406396	4.20198e+06	2.72257e+06	3.19605e+06	249767	174784	3.91534e+06	478257	2.1968e+06
C10217	278168	245651	205827	235574	245346	291350	213046	266046	207261	194567	210119	202343
C10280	1.89633e+06	294196	509548	289923	263943	1.59932e+07	214439	222457	227950	495740	239683	367712
C10285	745730	224953	798717	456507	379183	671794	506917	563987	532096	806885	797189	802037
C10306	3.45741e+06	1.51965e+06	1.79984e+06	1.57303e+06	1.29509e+06	1.88668e+06	742663	2.42344e+06	934318	1.4194e+06	2.19339e+06	1.80639e+06
C10313	524324	424499	354568	442202	425026	657964	395827	364886	377638	286109	316703	301406
C10333	1.05198e+06	465573	295523	1.92277e+06	2.53586e+06	1.56963e+06	345117	362386	315146	324636	358122	341379
C10350	1.15485e+06	764916	1.3581e+06	1.72783e+06	1.24013e+06	1.22726e+06	506893	499804	523191	1.39121e+06	649544	1.02038e+06
C10375	838267	402486	693394	9.73039e+06	1.35844e+07	1.83384e+06	322318	1.1663e+06	390199	2.22463e+06	314046	1.26934e+06
C10387	9.97067e+06	2.11985e+06	586181	3.35474e+06	3.08222e+07	4.15048e+07	898875	365257	761600	278529	1.32468e+06	801607
C10391	199004	136883	590756	98923.1	99762.1	103691	93844	91416.9	89791.4	622669	110191	366430
C10406	580707	424285	248667	343727	353902	400965	324019	399282	298493	287862	374978	331420
C10409	6.03218e+07	5.61332e+06	603273	1.68366e+06	2.36597e+06	1.56419e+06	467230	596477	566280	643459	2.03958e+06	1.34152e+06
C10426	117465	69875.2	49330.2	14090.3	14577.5	17961.2	13463.3	20987.7	13752.7	37101.5	53041	45071.3
C10434	766714	368131	265893	423874	487395	451976	236661	209583	228236	301303	287240	294272
C10487	339866	303944	247769	1.55939e+06	398688	6.06008e+06	259152	320260	249496	234215	277610	255912
C10511	1.18311e+06	1.97969e+06	7.14383e+06	2.55264e+06	2.38075e+06	3.20686e+06	1.90714e+06	7.60874e+06	7.07538e+06	1.11275e+07	2.54575e+06	6.83664e+06
C10523	162243	83193.2	113385	154839	163506	168597	164780	490019	284003	151480	578162	364821
C10526	225034	215067	146078	231526	199720	250789	197366	223897	179084	156107	160240	158173
C10544	364946	404305	412847	456315	591833	639038	330540	259602	301764	283055	333707	308381
C10556	861120	260105	334484	347264	194625	216232	182007	183388	189214	255321	206967	231144
C10559	516747	196064	138264	364335	337966	385368	188749	218276	523075	329862	308626	319244
C10560	156628	154208	182081	138259	131958	813133	147354	148561	146455	162201	139542	150871
C10562	1.41243e+06	660787	550725	426573	409564	430786	378017	357948	353743	450675	493513	472094
C10565	829569	194041	267714	103700	132741	121719	137087	139060	139504	185909	161345	173627
C10582	280505	190404	321696	150121	141752	199730	146095	146884	136699	358650	188027	273339
C10586	2.24801e+06	1.76847e+06	1.87513e+06	1.51589e+06	1.43223e+06	1.48095e+06	1.28794e+06	1.09344e+06	1.15999e+06	1.52913e+06	1.53545e+06	1.53229e+06
C10597	196230	163679	195838	131493	128905	143720	118612	116516	124518	170423	135153	152788
C10646	3.63192e+06	1.90439e+06	1.27858e+06	1.6644e+06	1.32918e+06	2.00056e+06	701511	529223	742193	1.17287e+06	1.48378e+06	1.32832e+06
C10654	878223	505320	329193	467279	400117	551676	240882	201904	252671	341445	497155	419300
C10668	601655	568676	532420	516025	532376	512783	514510	588818	506632	474578	517678	496128
C10693	4.4503e+06	1.76192e+06	2.48093e+06	2.16589e+06	1.87949e+06	2.72889e+06	579541	475537	559223	1.75035e+06	2.16396e+06	1.95715e+06
C10700	380659	291106	290001	283097	232850	264143	205063	197749	185441	227687	251074	239381
C10702	795559	823284	7.87535e+06	650432	654532	789441	861523	766744	794517	2.3217e+07	645368	1.19312e+07
C10730	81560.3	79668.6	110739	65008	69177.8	78236.1	72311.3	80431	66625.7	118392	67206	92799.2
C10736	1.73688e+08	1.83441e+08	1.71803e+08	1.77697e+08	1.69387e+08	9.66988e+07	1.89784e+08	1.85927e+08	1.90196e+08	1.42572e+08	1.55597e+08	1.49084e+08
C10784	154799	145091	274313	119361	116137	139893	125952	122229	120004	221501	124253	172877
C10798	1.2664e+06	1.12814e+06	756507	1.02547e+06	953127	1.03928e+06	722748	666543	654473	832856	1.15475e+06	993803
C10807	1.78377e+07	5.59385e+06	7.61432e+06	1.27817e+07	1.56144e+07	1.529e+07	6.01695e+06	7.7227e+06	1.69749e+06	9.31337e+06	8.81352e+06	9.06344e+06
C10810	755251	519491	2.31381e+06	1.18808e+06	856360	1.58654e+06	397232	390375	374806	2.36941e+06	435911	1.40266e+06
C10811	1.25605e+06	1.36917e+06	1.42041e+06	1.28381e+06	1.35263e+06	1.37267e+06	1.07899e+06	953651	1.03464e+06	1.29391e+06	1.32194e+06	1.30792e+06
C10820	4.42394e+06	6.6695e+07	4.57707e+07	4.42831e+06	5.84093e+06	4.61001e+06	5.34098e+06	1.1878e+08	3.49369e+06	5.29263e+07	4.21096e+06	2.85686e+07
C10831	9.69719e+08	6.90982e+08	3.652e+08	1.31354e+09	5.70492e+08	1.03627e+09	1.25853e+09	1.09404e+09	1.18208e+09	3.8963e+08	1.26099e+08	2.57864e+08
C10840	7.59746e+10	3.83711e+10	3.87339e+10	5.0419e+10	3.60238e+10	5.07045e+10	1.02444e+10	6.74125e+09	9.35679e+09	3.69829e+10	1.08476e+11	7.27297e+10
C10869	1.24371e+06	981673	905451	1.00944e+06	1.05937e+06	1.0108e+06	954709	903799	910567	1.1033e+06	789889	946594
C10876	1.58843e+06	1.40903e+06	7.08158e+06	9.93337e+06	8.25787e+06	9.45755e+06	3.52552e+06	2.90818e+06	3.75005e+06	6.90372e+06	1.10045e+07	8.95413e+06
C10921	201985	186463	859498	866350	3.23592e+06	1.18423e+06	645613	391009	541036	913604	2.3598e+06	1.6367e+06
C10923	199838	193170	459335	129130	137140	149896	142398	151114	144123	1.13183e+06	144160	637995
C10928	287909	270992	252708	179955	180630	204820	182827	166743	177807	185240	188962	187101
C10931	567246	622644	1.0252e+06	841765	541002	2.06767e+06	877655	941074	1.02862e+06	822761	1.11071e+06	966736
C10933	230843	205015	165089	251149	213165	293382	144735	124392	133207	134457	139995	137226
C10942	4.86524e+06	1.44964e+07	1.59096e+07	1.49595e+07	1.98281e+07	1.52328e+07	2.04812e+07	1.86178e+07	2.0213e+07	1.91912e+07	1.84277e+07	1.88095e+07
C10947	3.97563e+06	2.68034e+06	1.73572e+06	6.51902e+06	1.94063e+06	5.04286e+06	1.49622e+06	1.39375e+06	1.64659e+06	1.22447e+06	2.62104e+06	1.92275e+06
C10948	1.08606e+06	680956	866162	768403	968417	1.2829e+06	746649	624293	726514	611037	496560	553798
C10949	497513	191306	108621	143666	197357	208901	588903	714861	826741	73770.7	144083	108927
C10959	5.17015e+07	4.00754e+06	3.12192e+06	668566	8.41431e+06	558299	1.05911e+06	245276	280159	8.45065e+06	3.44061e+06	5.94563e+06
C10964	731386	559097	290404	323905	299250	1.20618e+06	204869	216782	218220	285592	437771	361682
C10970	360769	287413	381988	298751	270379	294064	201036	200397	213257	431217	253731	342474
C10985	835896	131513	126231	118921	111658	107346	120614	119363	116458	112860	267432	190146
C10997	7.2001e+06	3.42806e+06	3.67657e+06	5.08973e+06	7.49779e+06	3.93525e+06	2.54434e+07	3.70895e+07	2.60842e+07	3.85222e+06	1.06285e+07	7.24036e+06
C11001	1.95584e+08	2.7099e+08	2.19533e+08	1.99036e+08	2.33833e+08	2.40851e+08	2.45759e+08	2.95477e+08	2.95406e+08	1.89145e+08	2.21809e+08	2.05477e+08
C11014	4.46981e+06	6.56637e+06	681418	379712	622586	9.44072e+06	2.21458e+06	410144	589677	1.18403e+06	1.68133e+06	1.43268e+06
C11019	416474	458918	567821	306413	285492	289028	453179	397470	348513	270540	298238	284389
C11022	413950	220072	427151	222079	196065	248259	163375	143930	153300	398542	207636	303089
C11029	471138	310470	223599	349525	307521	322720	205213	213860	242880	259560	296235	277897
C11035	2.38333e+06	216200	442725	196075	184707	212554	163783	160053	159655	412850	474360	443605
C11041	815954	429616	330449	492731	381934	507619	219877	173754	223075	325050	474006	399528
C11045	428394	368630	422691	2.55992e+06	1.81286e+06	4.0369e+06	224890	222491	266381	334985	292455	313720
C11052	460358	248132	163468	285705	328520	1.19302e+06	159518	141266	153838	203088	184684	193886
C11055	570324	398834	708128	321665	315424	373983	245141	261830	272797	725389	338678	532034
C11061	1.84036e+06	1.6325e+06	8.20474e+06	1.15088e+07	9.56759e+06	1.09575e+07	4.08467e+06	3.36943e+06	4.34482e+06	7.99868e+06	1.27499e+07	1.03743e+07
C11066	154942	181342	134279	168218	153614	168897	145797	191914	139522	121235	134450	127842
C11085	1.00364e+07	1.00059e+06	3.95113e+06	3.99653e+07	2.80874e+07	1.51892e+07	1.48188e+06	601339	670937	7.83044e+06	1.08439e+06	4.45741e+06
C11086	245312	218896	264775	151581	157139	166536	158293	154897	153310	206162	148460	177311
C11088	1.63845e+06	1.63229e+06	1.10868e+06	1.77955e+06	1.68311e+06	2.06235e+06	1.49794e+06	1.50013e+06	1.37596e+06	1.14117e+06	1.26212e+06	1.20164e+06
C11092	1.38988e+06	930727	4.98095e+06	3.96534e+07	3.8943e+07	9.72487e+07	5.79206e+07	6.04557e+07	5.59838e+07	4.44555e+06	6.02736e+07	3.23596e+07
C11096	537023	568479	457388	477942	484664	507892	498458	641360	478117	439760	464676	452218
C11112	347034	348655	311809	226969	218300	247778	221901	215563	211758	225476	226861	226169
C11113	732642	726543	560896	489972	480328	1.46749e+07	463745	385595	386555	454497	477571	466034
C11114	218958	212253	128758	250047	239916	1.50142e+06	185694	191941	185150	161082	172679	166880
C11118	3.95673e+07	3.79412e+07	3.01056e+07	1.77911e+07	2.12055e+07	3.69974e+07	1.45471e+07	1.70945e+07	1.43613e+07	2.9534e+07	3.0751e+07	3.01425e+07
C11134	6.61184e+06	1.99989e+06	3.71197e+06	2.47067e+06	2.64571e+06	2.94517e+06	1.24022e+06	2.86972e+06	1.32968e+06	3.23382e+06	2.37513e+06	2.80447e+06
C11136	1.00281e+06	818176	4.08671e+06	5.73627e+06	4.76871e+06	5.46149e+06	2.13351e+06	1.3168e+06	2.12416e+06	3.98673e+06	6.35484e+06	5.17078e+06
C11149	4.52197e+06	2.39362e+06	2.22025e+06	4.78057e+06	3.6771e+06	1.40135e+07	4.56066e+06	4.67576e+06	4.71906e+06	1.22863e+06	7.28393e+06	4.25628e+06
C11155	1.39463e+06	925710	558394	926859	711025	937944	468524	414904	511142	564144	922849	743496
C11165	437664	391407	308034	424198	369510	2.77292e+06	371541	426357	341023	298119	357494	327807
C11172	2.55259e+07	1.30101e+06	5.93666e+06	3.45159e+06	1.31337e+07	1.53746e+06	219450	208988	224732	4.76477e+06	564737	2.66475e+06
C11188	210471	225712	174251	138773	134177	185654	117253	119791	113497	134834	148365	141600
C11195	948478	924420	1.95006e+07	5.49948e+06	1.0535e+07	8.52742e+06	1.29223e+07	1.29645e+07	1.38747e+07	1.48354e+07	7.98771e+06	1.14115e+07
C11203	974710	723257	607970	766313	790978	909833	520735	453557	448212	665879	887913	776896
C11222	857713	512486	626869	423650	412621	457480	397268	372964	398576	731874	420145	576009
C11226	521087	334247	229152	485982	421909	543395	266544	214474	240572	219517	250203	234860
C11228	2.67319e+06	152861	465266	942376	733100	915528	333241	218099	310220	636992	956058	796525
C11249	869416	609078	795461	4.28933e+06	1.88705e+07	717489	810400	1.97667e+07	1.96124e+07	531250	1.6616e+07	8.57365e+06
C11255	3.50422e+06	901809	767685	1.09086e+06	6.93206e+06	3.052e+06	571691	649802	522044	649551	610250	629900
C11268	73041.2	82501.2	64738.4	71073.5	70495.5	76356.8	69797.6	92422.8	64920.6	59934.9	64608.6	62271.7
C11283	2.42088e+06	1.43504e+06	869205	1.29058e+06	1.23562e+06	1.57473e+06	1.13775e+06	1.35048e+06	1.01743e+06	973624	1.26827e+06	1.12095e+06
C11292	3.18853e+06	2.10141e+06	4.52348e+06	1.0085e+07	1.8649e+07	1.36455e+07	2.47954e+07	3.3341e+07	2.76096e+07	4.45117e+06	1.67409e+07	1.0596e+07
C11299	253070	225854	242955	163209	163714	177391	165514	159707	163530	176298	173631	174965
C11301	697728	6.95138e+07	354733	2.7353e+07	8.4719e+06	9.62491e+06	233424	258307	208946	276759	3.93163e+07	1.97965e+07
C11303	1.54225e+06	1.62262e+06	1.28946e+06	998772	958948	1.054e+06	885083	858645	830490	1.05773e+06	1.15551e+06	1.10662e+06
C11309	3.13926e+06	2.36776e+06	1.10347e+07	1.66941e+06	1.76828e+06	4.12918e+06	7.27067e+06	5.46364e+06	7.67659e+06	1.02543e+07	1.8119e+06	6.0331e+06
C11315	320550	257172	229103	242318	236288	374529	191621	204832	174631	175982	162352	169167
C11318	1.62432e+06	2.57109e+07	392458	3.17148e+07	8.5599e+06	1.70932e+07	6.84997e+06	3.91695e+06	4.79675e+06	346208	4.33219e+07	2.18341e+07
C11328	352260	296769	1.51645e+06	2.23878e+06	1.86116e+06	1.96129e+06	526319	298311	480855	1.45584e+06	2.4802e+06	1.96802e+06
C11329	440171	232463	1.08373e+06	250120	230325	282332	158798	177952	160732	1.02262e+06	325691	674154
C11331	2.03298e+06	4.68567e+06	551359	759483	795798	399210	313782	150379	325982	1.53405e+06	649806	1.09193e+06
C11334	247569	100113	1.15102e+08	2.31378e+06	2.22736e+06	1.92077e+06	664808	461310	285803	5.20185e+07	2.84571e+06	2.74321e+07
C11341	365150	287721	263871	1.11294e+07	1.41913e+07	2.00615e+07	1.2249e+06	1.09269e+06	2.02694e+06	215611	206009	210810
C11342	208162	103839	72576.9	121786	97723	830165	64729.1	64391.9	72457.1	88057	87334.3	87695.6
C11345	595969	401798	166465	76084	79084.8	93201.9	81946.5	71997.3	75834.9	137692	212643	175167
C11351	57167.8	57878.8	61237.3	51859.6	51534.8	51322.3	54790.1	54388.6	54187.1	53126.1	52185.9	52656
C11352	429744	1.26624e+07	359470	275986	283462	291611	490938	613484	4.34226e+06	250341	265556	257949
C11355	631910	380299	678075	425525	429375	420750	255193	230085	287886	762314	412524	587419
C11371	3.52262e+06	1.65932e+06	2.79873e+06	1.3972e+06	1.81453e+06	1.33801e+07	5.47538e+06	3.09342e+06	4.97066e+06	1.31669e+06	1.13461e+06	1.22565e+06
C11378	353473	335498	321249	252722	263243	277604	249324	256952	245227	245533	273116	259325
C11437	313056	269383	286546	426605	461423	340360	164343	156508	168298	242173	224982	233577
C11490	798315	203272	133914	234052	269126	2.60165e+06	118520	111550	126026	166372	151295	158833
C11504	316754	209825	83190.3	24315	24583.5	30289.8	22704.5	35393.5	23192.6	63228	129704	96465.8
C11510	4.91571e+06	1.45287e+07	8.14479e+06	7.55006e+06	1.2923e+07	8.62236e+06	1.38915e+07	1.47617e+07	1.40369e+07	6.42431e+06	1.07677e+07	8.596e+06
C11516	2.46424e+06	2.11727e+06	1.83019e+06	2.82754e+06	2.42587e+06	3.23383e+06	1.40594e+06	1.36268e+06	1.36576e+06	1.45674e+06	1.47868e+06	1.46771e+06
C11520	285224	276844	246167	392340	240169	198526	241448	211817	698964	188455	188523	188489
C11544	1.13968e+07	5.4282e+07	646041	1.76657e+06	8.54253e+06	2.537e+06	2.72728e+06	1.3385e+06	1.24066e+06	3.3314e+06	1.18938e+07	7.6126e+06
C11571	365623	188436	110494	193292	176270	365391	146007	153313	127791	118033	151509	134771
C11573	2.07613e+06	808241	750480	646215	637661	637300	614948	613066	601410	609360	629939	619650
C11584	4.40043e+07	4.66734e+06	1.99971e+06	921032	890739	1.11113e+06	761463	764230	770363	2.04846e+06	7.75678e+06	4.90262e+06
C11593	364086	209260	203847	243437	224702	221484	193955	128969	161039	198541	229344	213942
C11602	3.23052e+07	1.38664e+06	1.34068e+07	1.92087e+06	1.42048e+06	3.13315e+06	988774	998961	1.0073e+06	7.69753e+06	8.5102e+06	8.10387e+06
C11604	1.06469e+09	1.06712e+09	9.33834e+08	7.42969e+08	8.35885e+08	8.31199e+08	8.97702e+08	2.12213e+08	8.86331e+08	6.32096e+08	7.71002e+08	7.01549e+08
C11646	32018.4	23955.3	34712.9	31526.6	39732.9	52636	30634.1	25614	27056.5	24605	26402.9	25504
C11655	142484	136438	192063	112034	115573	139155	114023	112788	111310	201549	112279	156914
C11675	3.59167e+06	41270.7	4.47652e+06	6.40892e+06	7.74723e+06	615759	2.04004e+07	1.48421e+07	1.4641e+07	639307	309139	474223
C11684	1.72488e+06	1.48716e+06	7.68989e+06	1.07867e+07	8.96723e+06	1.027e+07	3.82836e+06	3.158e+06	4.07218e+06	7.49676e+06	1.19498e+07	9.7233e+06
C11695	1.23769e+07	1.88144e+06	1.24583e+06	3.49296e+06	3.14293e+06	1.11954e+06	716406	603361	1.38997e+06	1.12843e+06	1.76662e+06	1.44752e+06
C11700	1.33583e+06	1.14987e+06	6.05247e+06	8.48984e+06	7.05782e+06	7.68851e+06	3.01318e+06	2.48556e+06	3.20509e+06	5.80402e+06	9.40534e+06	7.60468e+06
C11707	1.63091e+07	1.36278e+06	1.61844e+07	1.37047e+07	6.99127e+06	7.72719e+06	2.54702e+06	1.89388e+06	1.76673e+06	1.60271e+06	1.16348e+07	6.61875e+06
C11709	122175	113144	8.83847e+06	99888	97077.5	205953	2.87804e+06	2.21044e+06	2.4627e+06	7.53732e+06	94071.6	3.81569e+06
C11710	107882	113985	109575	99749.9	99679.1	98938.6	100373	99558.2	102731	97579	97763.3	97671.1
C11711	144989	89161.4	497453	746829	90191.3	202670	258493	288290	834349	177307	88403.9	132855
C11712	172371	115719	140812	83474	81513.5	281494	89993.1	86080.6	82575.3	102943	107225	105084
C11714	4.33125e+08	2.76243e+08	2.70846e+08	3.8824e+08	3.24337e+08	3.60733e+08	1.81296e+08	1.31545e+08	1.63643e+08	1.88035e+08	2.21758e+08	2.04897e+08
C11715	832420	1.19778e+06	686470	1.01159e+06	529680	8.03395e+06	464717	468609	474944	613068	515610	564339
C11729	1.52461e+07	1.4767e+07	1.16806e+07	1.39252e+07	1.5007e+07	1.71937e+07	6.34982e+06	481743	498909	3.11649e+06	1.43458e+07	8.73116e+06
C11758	842271	641553	1.57191e+07	2.69266e+06	670236	1.918e+07	637611	567465	588020	1.71828e+07	881032	9.03193e+06
C11769	3.53786e+06	5.53726e+06	1.03237e+07	3.74625e+06	3.70314e+06	3.66735e+06	3.51834e+06	3.59002e+06	4.22449e+06	7.91653e+06	3.67436e+06	5.79545e+06
C11773	3.22041e+06	136232	977327	7.21786e+06	5.57047e+06	5.63818e+06	2.21444e+06	863119	1.83303e+06	239940	1.32144e+07	6.72715e+06
C11774	62325	67705.1	66417	58264	56042.4	55061.3	60095	60312.9	60834.5	59768.2	58527.4	59147.8
C11800	418442	463364	453603	522971	1.92927e+06	3.55177e+06	378823	297524	345843	317879	362338	340109
C11803	1.29834e+06	728685	544520	858600	682268	911084	373606	294709	378363	514355	820945	667650
C11804	4.49874e+06	1.97735e+06	2.506e+06	2.04681e+06	1.68515e+06	2.17643e+07	674073	532785	630149	1.8469e+06	2.854e+06	2.35045e+06
C11806	1.00514e+06	498464	569124	495521	421935	590449	168792	123760	153075	457894	687810	572852
C11810	130814	127063	133726	110455	109527	108854	101248	104100	106673	105357	109684	107521
C11819	1.31711e+06	195278	256925	149869	155156	186518	206425	183715	190370	821112	622469	721791
C11830	1.37561e+06	131546	520245	1.0285e+06	941270	1.04948e+06	500681	311908	541507	898733	1.04099e+06	969862
C11831	280024	182167	1.10294e+06	103089	520577	211630	115927	93311.3	94864.2	1.02577e+06	505370	765570
C11841	621023	485850	523690	383699	349657	392221	374864	413377	386811	382329	363289	372809
C11849	1.15732e+06	991944	1.17982e+06	6.08305e+06	1.40164e+06	3.57453e+06	1.29807e+06	1.55133e+06	2.76369e+06	1.94683e+06	2.56373e+06	2.25528e+06
C11878	288107	226418	257952	164245	173525	200788	205687	199146	170622	170117	184609	177363
C11891	915914	1.06948e+06	1.55213e+06	229140	271642	623661	1.11692e+06	839322	1.17928e+06	1.57526e+06	246976	911119
C11918	1.23133e+06	2.90096e+06	369776	7.80973e+06	619256	4.01365e+06	861613	591854	4.74656e+06	301279	1.21785e+06	759565
C11923	1.31499e+07	6.7992e+06	754702	5.2447e+06	3.2297e+06	3.22185e+06	1.46915e+06	1.07383e+06	623831	395990	2.7476e+06	1.57179e+06
C11959	7.94653e+07	357977	5.40589e+07	7.79414e+07	4.32136e+07	6.43951e+07	1.99693e+07	1.17591e+07	1.52376e+07	3.89246e+06	1.07818e+08	5.5855e+07
C11960	2.32167e+07	2.95757e+07	6.04552e+06	1.34744e+07	1.26185e+07	1.0455e+07	2.89456e+07	2.89002e+07	3.04733e+07	5.89369e+06	1.49324e+07	1.04131e+07
C11985	2.1646e+06	1.79587e+06	1.35016e+06	1.7018e+06	1.75657e+06	2.02053e+06	1.15643e+06	1.06828e+06	1.07611e+06	1.47876e+06	1.97185e+06	1.7253e+06
C11987	1.34281e+06	545599	5.61486e+06	628727	559413	781387	426867	373995	409267	4.42475e+06	742429	2.58359e+06
C11990	422252	8.71412e+06	3.59786e+06	526281	847442	930923	233948	209522	224432	5.87485e+06	862836	3.36884e+06
C11991	9.47076e+06	2.22107e+06	2.17019e+07	1.93242e+06	1.56941e+06	1.08081e+08	1.23157e+07	8.28725e+06	1.15941e+07	1.64013e+07	2.09273e+06	9.24701e+06
C11998	237048	98754.9	140315	123770	108001	160186	32338.4	26994.4	31353.3	93940.7	114766	104354
C12011	3.8786e+06	3.63167e+06	2.41925e+06	3.04934e+06	3.14748e+06	3.62044e+06	2.07213e+06	1.89397e+06	1.92821e+06	2.64969e+06	3.53321e+06	3.09145e+06
C12012	727571	672978	526648	534671	1.74391e+06	1.09673e+06	257793	244674	255665	423364	414534	418949
C12027	763244	1.18803e+06	1.34326e+06	861164	912617	736423	1.93353e+06	1.96897e+06	921620	617504	656782	637143
C12039	99469.4	88474.6	88208.9	76834.4	76154	340961	79215.6	82899.8	81042.1	75518.9	80005.4	77762.1
C12044	380590	153904	1.27021e+06	134962	143918	176574	109174	110400	113736	1.6128e+06	146283	879541
C12045	2.74215e+06	156663	482894	991813	744742	937193	380427	223260	354778	664603	978681	821642
C12062	472826	830262	950180	305555	299449	412567	345610	479336	330996	290054	291494	290774
C12065	2.23694e+06	703102	489409	352427	567589	857856	350280	340199	518140	645301	320347	482824
C12081	597811	291613	558164	314022	245817	699827	228896	215660	219393	435909	370545	403227
C12098	1.19499e+07	4.492e+06	5.78152e+06	4.02924e+06	3.44949e+06	5.06314e+06	1.25581e+06	1.02387e+06	1.23212e+06	3.92728e+06	4.05691e+06	3.9921e+06
C12101	739294	361684	518197	382356	414678	415936	250666	303666	462109	452436	403074	427755
C12108	605276	2.26042e+07	543281	315696	270369	354422	720593	6.64837e+06	5.65767e+06	291719	717412	504565
C12109	288489	159536	136104	181951	294006	321725	371673	1.0562e+06	454097	134399	220452	177425
C12110	405706	382752	331146	241765	275132	256048	267095	278441	352538	237209	277005	257107
C12114	347468	244000	253760	187810	184686	197628	172635	166909	201707	207424	200585	204005
C12127	508548	480581	436403	1.20589e+06	1.0994e+06	846000	314563	315572	321664	340013	321615	330814
C12150	8.2509e+07	2.9615e+07	7.91161e+06	7.65418e+07	6.16351e+07	6.90098e+07	3.3385e+07	2.35558e+07	2.73077e+07	1.26831e+08	8.54464e+07	1.06139e+08
C12153	729916	458221	732420	341789	371917	454734	332621	334419	311230	816556	428091	622324
C12154	1.98519e+07	1.60517e+07	9.7802e+06	8.44481e+06	9.19348e+06	1.18731e+07	4.74736e+06	5.44328e+06	2.7368e+06	864573	1.41436e+07	7.50408e+06
C12215	474994	450668	860314	381916	368428	435372	386478	380952	394527	1.09497e+06	381263	738115
C12216	4.3641e+08	309493	1.95329e+08	1.96276e+08	1.20229e+08	1.93709e+08	6.76031e+07	4.81335e+07	5.01829e+07	3.75061e+07	2.81621e+08	1.59564e+08
C12244	1.67761e+08	7.99141e+07	1.23533e+08	2.42525e+08	1.8109e+08	5.26743e+08	1.79908e+08	7.91051e+07	9.59236e+07	1.45282e+08	9.87302e+07	1.22006e+08
C12256	1.01012e+07	7.10114e+06	3.75517e+06	6.1558e+06	5.9334e+06	8.91563e+06	3.61035e+06	3.30093e+06	3.3548e+06	4.4654e+06	5.07105e+06	4.76822e+06
C12287	680286	435574	1.14593e+06	305930	302082	314452	338448	318314	323513	318149	299262	308706
C12288	665623	613132	699470	427997	533348	516032	470773	381962	507102	1.1101e+06	409915	760007
C12304	515855	274754	478685	421772	456042	329323	166167	169894	170326	1.26066e+06	374498	817580
C12310	2.42375e+06	761325	491417	1.05075e+06	819285	971785	328839	214767	323970	717109	1.03303e+06	875069
C12311	2.08133e+06	1.97372e+06	2.28759e+06	1.60461e+06	1.77583e+06	1.64243e+06	1.57954e+06	1.5514e+06	1.48756e+06	1.78732e+06	1.57789e+06	1.68261e+06
C12312	233748	144892	206478	186401	125673	1.9997e+06	109082	111528	115570	511851	206749	359300
C12332	595253	488007	377908	440827	712335	473433	475962	450582	580192	455590	374962	415276
C12333	2.38883e+07	9.09136e+06	3.73815e+06	2.68896e+07	1.60881e+07	1.4812e+07	7.34939e+06	5.46542e+06	5.11529e+06	698795	8.29389e+06	4.49634e+06
C12337	534333	368058	582847	289418	277765	337201	234532	224292	220617	619099	272673	445886
C12367	4.42407e+07	4.98793e+06	2.16989e+06	257646	565708	266025	261313	258601	263027	1.17155e+06	7.55878e+06	4.36516e+06
C12389	652636	418668	2.33887e+06	321086	333122	608332	848332	879645	702567	2.07356e+06	358568	1.21607e+06
C12390	66890.1	68414.9	69638.5	56391.5	55500.8	55877.9	61787	61140.7	61842.6	61109	55218.8	58163.9
C12393	2.02484e+06	1.17325e+06	1.04857e+06	892359	764551	901363	646949	616944	642622	1.09413e+06	899164	996647
C12404	5.02161e+06	2.3855e+06	602388	1.9026e+06	1.64011e+06	1.97012e+06	933889	796760	932653	337698	2.05042e+06	1.19406e+06
C12406	246713	121704	249220	91846.7	100387	113169	92124.5	90097.4	89873.4	232402	133062	182732
C12436	70889.3	92503.2	108221	88481	59660.7	67004.9	66691.8	67238.2	139358	69587.1	63156.1	66371.6
C12448	579829	1.52816e+06	2.89825e+06	402781	1.55483e+06	1.38065e+06	1.44314e+06	1.3444e+06	2.85012e+06	429594	794486	612040
C12454	2.18079e+08	4.42005e+07	6.67995e+07	9.10972e+07	8.48289e+07	8.42794e+07	1.64585e+07	1.87006e+07	1.72597e+07	3.119e+07	1.13931e+08	7.25607e+07
C12531	2.25212e+08	5.58081e+08	6.83772e+08	9.41978e+07	5.42426e+08	4.31172e+08	2.29697e+08	1.9663e+08	1.88793e+08	2.19703e+08	1.51467e+08	1.85585e+08
C12552	1.65604e+06	1.31561e+06	710868	1.75359e+06	1.7334e+06	1.71665e+06	1.6469e+06	1.68046e+06	1.58236e+06	649468	1.71993e+06	1.1847e+06
C12570	2.55978e+06	244785	1.05437e+06	1.9152e+06	1.75154e+06	1.9529e+06	992896	598275	951910	1.8859e+06	2.08523e+06	1.98556e+06
C12599	175297	520001	2.34837e+06	23631.1	24563.1	25898.1	24091.6	22361.8	23553.7	1.30783e+06	590489	949160
C12600	146123	617961	43031	81546	60803.8	73168.6	34666.7	21869.2	38816.6	55471.5	65771.2	60621.4
C12669	392258	308124	286562	227944	216237	236424	172277	169096	157347	254090	243247	248669
C12755	1.05203e+07	4.04854e+06	151678	1.56782e+06	2.72931e+06	1.25445e+06	198539	215700	181465	3.38976e+06	2.5421e+06	2.96593e+06
C12767	101840	111825	149481	85922.1	86471.9	101185	117019	102313	107917	803319	86138.2	444728
C12835	2.63238e+06	2.12773e+06	1.6748e+06	2.13168e+06	2.30526e+06	2.40661e+06	1.37013e+06	2.88883e+06	1.27497e+06	1.82591e+06	2.33623e+06	2.08107e+06
C12842	6.37089e+06	3.75007e+06	3.24279e+06	4.22635e+06	3.85258e+06	4.50327e+06	6.26411e+06	8.29874e+06	7.86063e+06	3.23187e+06	4.16351e+06	3.69769e+06
C12891	938788	297593	528970	371926	346027	1.04404e+07	235487	243849	242349	413625	394100	403862
C12915	3.84856e+07	1.56358e+06	7.83606e+06	8.1781e+07	6.77372e+07	6.72756e+07	3.21529e+06	1.20429e+06	3.3982e+06	8.67977e+06	3.90697e+07	2.38747e+07
C12937	3.02165e+06	1.62823e+06	8.16008e+06	3.8023e+06	3.21916e+06	3.11027e+06	1.16105e+06	1.17301e+06	1.1828e+06	9.03867e+06	5.59107e+06	7.31487e+06
C12954	328155	249205	250916	346923	451633	451444	861814	1.39171e+06	863266	189638	356487	273063
C12958	1.34208e+06	1.08656e+06	976401	1.13188e+06	1.08791e+06	1.81469e+06	1.00147e+06	948222	966615	762628	810644	786636
C12986	474424	407397	739911	1.01996e+06	239631	655803	470238	391970	1.42635e+06	411001	305307	358154
C12987	595500	285924	389545	834037	1.59118e+06	1.13817e+06	162966	155197	166888	232678	223097	227887
C13038	98182	90924.6	116614	80271.6	78013	92186.5	78834.6	74459.8	74623.8	96820.8	75597.5	86209.1
C13044	3.7191e+07	1.9373e+06	1.1409e+06	5.59355e+06	9.4597e+06	5.50163e+06	987802	1.19862e+06	1.75314e+06	1.14959e+06	7.52406e+06	4.33682e+06
C13077	3.89744e+06	4.75276e+06	307667	1.13331e+06	538099	2.31562e+06	916028	229962	871472	4.68045e+06	594146	2.6373e+06
C13140	682534	467832	1.88716e+06	661022	565371	3.05406e+06	2.22904e+06	3.50836e+06	2.33106e+06	1.13585e+06	1.1397e+06	1.13778e+06
C13154	1.09321e+06	1.29198e+06	757541	1.0688e+06	993826	1.88218e+06	976576	831261	890002	670444	990816	830630
C13168	3.14813e+06	460879	2.6616e+06	3.88543e+06	424149	374711	236715	240258	1.18502e+06	534934	9.03994e+06	4.78744e+06
C13179	585521	262650	212895	415943	449890	331853	160235	152597	164092	228779	219358	224069
C13244	75539.9	69232.9	61865.3	49927.8	49254.2	52599.6	45355.7	46672	49682.8	51625.7	54228.6	52927.2
C13280	484373	415603	246136	316894	350300	387204	320721	395219	297753	278072	339055	308563
C13299	3.25742e+06	3.17956e+06	2.66309e+06	3.20884e+06	3.25378e+06	3.24545e+06	2.88726e+06	2.50086e+06	2.98418e+06	3.0501e+06	3.13499e+06	3.09255e+06
C13309	9.31597e+07	5.721e+07	1.2915e+08	3.53526e+07	4.00683e+07	4.32483e+07	2.7663e+07	1.44697e+07	4.15907e+07	1.30872e+08	2.84963e+07	7.96843e+07
C13355	5.28072e+07	3.95516e+07	2.55231e+07	2.00804e+07	1.05788e+08	4.56759e+07	3.15069e+06	2.26493e+06	2.37707e+06	5.69621e+07	8.68907e+06	3.28256e+07
C13391	170753	201658	365205	175065	647395	125703	121932	432551	189114	267532	148222	207877
C13424	582794	513599	2.51532e+06	2.08952e+06	1.46864e+06	1.95068e+06	1.16071e+06	1.1102e+06	1.13404e+06	2.59242e+06	1.94582e+06	2.26912e+06
C13429	345441	353535	340564	221096	216679	278893	251601	294332	214100	223735	238065	230900
C13444	718259	459088	406504	367814	378893	390058	261953	227119	268349	361118	391036	376077
C13522	329382	216767	300756	361745	464195	419997	211511	178170	195679	238351	208029	223190
C13620	261788	257112	144052	196046	206174	211912	2.51298e+06	2.92195e+06	3.16446e+06	171845	209756	190800
C13688	368716	207367	130987	63514	67005.1	80072.4	70402.6	61854.9	64061.6	119424	170556	144990
C13698	3.06358e+08	1.65737e+07	8.11397e+07	554473	1.1835e+08	2.65507e+06	5.67368e+07	347126	403964	3.83762e+07	6.81125e+08	3.59751e+08
C13711	410063	406426	404989	375199	354941	360327	361547	384707	356960	369163	368131	368647
C13718	1.0744e+06	701044	335949	140909	171391	168022	186211	164949	170013	250598	377817	314207
C13719	206982	182787	151644	2.883e+06	1.74405e+06	2.09889e+07	159069	195226	141713	143090	156348	149719
C13720	1.49248e+06	2.09926e+06	2.7972e+06	3.68538e+06	1.21997e+06	6.8919e+06	3.61747e+06	3.31734e+06	5.4613e+06	1.31137e+06	1.81062e+06	1.561e+06
C13721	67753.9	26649.3	64651.6	23723.1	95118.3	210961	65421.3	26385.4	58303.2	149905	44595.3	97250.2
C13728	8.40305e+07	9.42069e+07	5.42929e+07	4.3624e+06	4.9217e+06	3.69849e+06	3.70557e+06	2.37863e+06	3.45795e+06	1.81471e+07	5.66151e+06	1.19043e+07
C13750	505202	423372	1.83745e+06	271262	406253	540183	1.32224e+06	993612	1.39606e+06	1.86484e+06	379496	1.12217e+06
C13757	813777	609170	511927	746251	637031	934453	572726	408853	452829	421272	437183	429227
C13812	9.03881e+07	5.29593e+06	9.14821e+06	4.51726e+07	2.60044e+07	3.08319e+07	1.4088e+07	7.46449e+06	1.41295e+07	5.333e+06	4.37036e+07	2.45183e+07
C13824	271402	170905	296007	168422	153330	168030	124572	129230	121987	287986	139209	213597
C13826	287553	181548	354009	149829	157119	188560	121922	123627	122584	307855	170759	239307
C13837	5.65694e+06	3.97682e+06	2.22631e+06	4.10278e+06	4.09904e+06	5.02092e+06	2.5896e+06	2.08372e+06	2.33727e+06	2.50073e+06	2.83991e+06	2.67032e+06
C13838	956734	759946	326367	496851	512172	470899	461848	454583	445202	228424	558644	393534
C13843	6.20179e+06	9.77792e+06	3.46303e+07	2.66532e+07	3.97478e+07	3.43321e+07	7.14415e+07	8.68941e+07	7.35087e+07	1.13655e+08	6.35785e+06	6.00063e+07
C13877	244987	218007	148075	837203	380609	943182	224609	270819	297747	284778	162430	223604
C13901	378478	318857	1.71369e+06	2.40541e+06	1.99968e+06	2.17837e+06	565492	335265	551256	1.5642e+06	2.66479e+06	2.1145e+06
C13906	987968	1.03353e+06	832663	635437	635392	2.08699e+06	585374	552602	563693	617399	679358	648378
C13910	248711	1.99151e+06	430520	430298	1.6298e+06	1.21661e+06	190227	315929	270996	330361	564376	447368
C14039	654509	236159	610971	249084	286968	1.39538e+06	476098	240998	166000	425586	188474	307030
C14077	85710.5	78560.3	77534.6	68112.5	67201.1	67681.9	70503.3	75810.8	71674.8	68351.3	71054.8	69703
C14112	1.50431e+06	2.95686e+06	1.99603e+06	965043	563443	1.00649e+06	2.0799e+06	3.30609e+06	1.71801e+06	481136	493944	487540
C14114	916517	908395	912146	632424	1.06719e+06	783207	940474	749997	818274	640012	640251	640132
C14147	461686	288423	443467	578723	890511	581664	401984	671690	1.32744e+06	320104	373427	346766
C14155	104392	99110	517307	1.28992e+06	9.50964e+06	5.62562e+06	1.0896e+06	167742	4.46021e+06	496631	7.0299e+06	3.76327e+06
C14164	1.06318e+07	5.51801e+06	4.86279e+06	5.36477e+06	4.40002e+06	4.87965e+06	2.38103e+06	2.04931e+06	2.28881e+06	3.62627e+06	5.29998e+06	4.46312e+06
C14179	1.24375e+06	1.22816e+06	1.1365e+06	963974	1.86253e+06	1.52823e+06	1.6686e+06	7.75012e+06	943181	919483	2.05287e+06	1.48617e+06
C14186	310801	274406	1.47577e+06	2.07008e+06	5.75407e+06	4.29317e+06	2.15691e+06	278455	842739	1.33506e+06	4.70177e+06	3.01841e+06
C14190	9.86943e+06	1.30387e+07	9.45514e+06	1.24534e+07	8.48443e+06	3.41574e+06	1.50333e+07	1.50678e+07	1.51376e+07	1.83235e+06	8.16702e+06	4.99969e+06
C14201	1.31428e+06	1.18849e+06	1.52835e+06	968081	915724	977321	848589	846020	906519	1.19412e+06	945685	1.0699e+06
C14211	436067	386815	1.94279e+06	753666	2.08877e+06	2.59635e+06	898011	476311	847078	1.89526e+06	2.62233e+06	2.25879e+06
C14213	384255	343642	269858	372432	324418	674829	326200	374327	299407	261739	313868	287803
C14216	756204	334673	212434	346085	334086	411754	248084	260498	226540	250236	250590	250413
C14222	840219	776392	805295	675826	660361	706367	698433	717064	712025	691516	708082	699799
C14226	8.49872e+06	773151	281305	297868	255190	324023	224870	213802	204079	229914	289715	259815
C14251	212725	152566	64705	30909	29610.3	29420	30052.1	28787.6	28066.3	55368.9	124679	90023.9
C14279	992013	5.24593e+06	7.85211e+06	1.83279e+06	2.37745e+06	1.48571e+07	1.25886e+07	1.65671e+07	1.17723e+07	8.47149e+06	8.66926e+06	8.57037e+06
C14302	1.38349e+07	1.531e+06	5.06278e+06	6.54472e+07	7.20238e+07	2.67663e+07	881888	289111	330228	8.29332e+06	1.14769e+06	4.7205e+06
C14307	1.17318e+06	796272	413597	549069	515197	1.04851e+06	326457	317715	318742	443360	623478	533419
C14318	23190.8	34166.5	31599.4	9261.5	9162.13	9183.56	8689.17	9419.07	8978.21	26827.6	107457	67142.1
C14325	471900	330005	585922	1.12255e+06	4.88734e+06	481532	5.05647e+06	865918	8.53793e+06	600205	5.04257e+06	2.82139e+06
C14328	569250	622939	271515	1.70147e+06	990112	1.54057e+06	332472	503691	376179	198083	3.14979e+06	1.67394e+06
C14332	1.98976e+06	441834	1.84923e+06	269772	292658	320349	276045	315735	291446	1.8033e+06	305041	1.05417e+06
C14333	818956	489165	487689	413315	3.30112e+06	1.32839e+06	1.577e+06	533999	1.75467e+06	401288	906443	653865
C14339	521793	448459	431827	330524	325852	348564	262319	254815	259670	360421	385301	372861
C14343	1.64723e+06	718427	2.932e+06	7.92825e+06	1.02519e+07	759479	710727	1.69425e+06	2.67901e+06	1.34721e+07	1.06022e+06	7.26615e+06
C14387	1.70666e+06	1.77344e+07	1.21365e+06	6.89931e+06	3.87552e+06	6.00355e+06	748798	692586	696633	1.20498e+06	8.24728e+06	4.72613e+06
C14388	197814	190016	190915	158797	165607	155166	172513	173676	178866	173183	165111	169147
C14395	5.79342e+07	4.15831e+07	1.65297e+08	2.1688e+07	2.29721e+07	2.75771e+07	4.41019e+07	4.36115e+07	4.09335e+07	3.64819e+07	2.52741e+07	3.0878e+07
C14396	1.0611e+08	3.99165e+07	2.31118e+06	234461	3.25489e+07	2.69921e+07	4.43784e+06	3.59516e+06	6.40133e+06	6.24903e+06	243671	3.24635e+06
C14397	1.08287e+06	426642	301563	360258	305292	321987	260247	253191	265457	242335	307082	274708
C14398	362397	354632	336521	390876	700121	290340	273167	291669	282302	258410	303824	281117
C14402	1.11205e+08	1.47116e+08	1.49197e+08	1.2466e+08	1.29619e+08	1.14221e+08	1.86748e+08	1.92244e+08	1.79503e+08	9.1352e+07	9.19741e+07	9.16631e+07
C14416	235262	208940	168250	255957	217245	1.29957e+06	147506	133506	135757	143016	149950	146483
C14422	900192	685301	944436	572604	986287	1.91604e+06	206012	267708	234849	491394	372699	432047
C14428	584421	581872	367960	1.31465e+06	1.94438e+06	9.41066e+06	500039	521399	494185	429943	476227	453085
C14430	1.68146e+06	744162	561471	853704	981638	929089	551627	579230	503723	606841	578516	592678
C14436	229843	151532	144588	187115	179923	255988	118276	114874	113703	118984	121768	120376
C14441	1.39021e+06	726253	311397	684813	566649	627529	286601	253530	284873	161719	703034	432376
C14460	1.27792e+06	8.94647e+06	1.23026e+07	3.69234e+06	1.44326e+07	1.64357e+07	1.61191e+07	2.74568e+06	3.26626e+06	1.76326e+07	1.64337e+07	1.70331e+07
C14470	279850	148779	288774	192587	372426	420396	186136	109218	171814	246784	191730	219257
C14472	526940	413919	384953	306209	290482	301560	233845	227155	211371	334546	326766	330656
C14512	2.14408e+07	1.98532e+07	4.63111e+07	1.7315e+06	1.64321e+07	3.13741e+07	8.65697e+06	7.46268e+06	8.28025e+06	7.91397e+07	2.85994e+07	5.38696e+07
C14519	1.84815e+07	1.09467e+07	5.03692e+06	1.95931e+07	2.12326e+07	4.06333e+07	1.6148e+07	6.3742e+06	3.46404e+06	1.64314e+06	2.39713e+07	1.28072e+07
C14526	1.65039e+06	198293	183958	6.57673e+06	889804	1.70112e+06	126708	130229	114348	137778	754089	445934
C14533	1.0611e+08	4.94161e+07	4.73159e+06	4.69592e+07	3.25489e+07	6.99788e+07	4.43784e+06	6.37471e+06	1.25947e+07	1.06657e+07	501450	5.58357e+06
C14537	29197.3	29642.4	34028.1	25489.8	32110.6	122799	27764.9	26937.9	29471.2	27680.9	27863.6	27772.3
C14543	700479	464105	294081	301593	290502	329645	239287	213121	235254	311353	309071	310212
C14561	2.031e+06	1.72894e+06	549696	968821	780305	1.08127e+06	326879	251235	354716	659313	970879	815096
C14574	933254	339556	803563	930799	660189	592813	262036	1.35959e+06	583748	1.65691e+06	277014	966964
C14592	419961	364061	321069	496034	425570	1.82432e+06	241432	236724	239596	249869	259404	254636
C14596	4.07991e+08	1.13231e+08	6.22966e+06	7.10264e+07	4.53792e+07	5.29358e+07	1.68701e+07	1.43097e+07	1.49806e+07	6.9004e+06	8.0088e+07	4.34942e+07
C14602	1.42651e+06	1.6967e+06	2.67777e+06	1.18013e+07	1.14599e+07	2.50649e+06	1.03065e+07	2.21296e+06	2.33607e+06	673963	9.23133e+06	4.95265e+06
C14642	6.18912e+06	6.24188e+06	3.09374e+06	3.38001e+07	6.18166e+06	1.39345e+07	1.05133e+07	5.8475e+06	7.86063e+06	2.63622e+06	1.47524e+07	8.6943e+06
C14689	2.72121e+06	2.60147e+06	2.33847e+06	1.72474e+06	1.66108e+06	1.70057e+06	1.81415e+06	1.91239e+06	1.78677e+06	1.23861e+06	1.27119e+06	1.2549e+06
C14701	1.15061e+06	609668	472921	1.43592e+06	6.73778e+06	2.63399e+06	4.46202e+06	3.69019e+06	2.28442e+06	405645	512101	458873
C14702	265580	261357	242679	200448	198763	199035	196953	188915	194475	191197	203700	197448
C14704	850903	738924	931507	304657	736940	1.98717e+06	3.55507e+06	2.11273e+06	2.36373e+06	686257	721368	703813
C14713	838344	529497	3.00589e+06	454751	450047	485743	421385	449784	386690	2.66678e+06	460827	1.5638e+06
C14744	891858	590787	234232	271282	185722	142568	296996	146354	162809	187461	736985	462223
C14752	1.6002e+06	6.04459e+06	6.02688e+06	1.10003e+07	1.33193e+07	6.83619e+06	1.65793e+07	6.31561e+07	1.49379e+07	1.43026e+07	2.3065e+06	8.30455e+06
C14758	5.10959e+07	2.74001e+07	2.72044e+06	1.42746e+07	1.38482e+07	9.56007e+06	2.20682e+06	7.53096e+06	1.92078e+06	5.50364e+06	1.62754e+07	1.08895e+07
C14765	2.56477e+06	229361	594870	472516	154529	254222	196107	155791	191714	291697	375868	333782
C14767	722597	275119	6.74087e+06	508640	421928	2.14962e+06	233596	209461	238723	7.36856e+06	642766	4.00566e+06
C14774	1.0859e+06	948320	890850	299360	470123	385890	1.83743e+06	152638	418231	1.70982e+06	665906	1.18786e+06
C14788	5.3115e+07	3.60516e+07	1.6195e+07	6.95929e+07	9.73741e+07	8.12362e+07	9.11562e+07	8.79108e+07	8.80076e+07	9.65847e+06	5.68707e+07	3.32646e+07
C14796	2.63447e+06	200357	4.23552e+06	49323.1	6.68419e+06	80999.5	2.00996e+06	70162.5	69067.3	3.95585e+06	270081	2.11297e+06
C14826	8.76011e+06	4.06556e+06	3.94428e+06	3.24028e+06	3.01061e+06	4.80427e+06	1.19482e+06	835015	1.2281e+06	3.14538e+06	2.80316e+06	2.97427e+06
C14841	84188.5	120852	63684.2	111480	111020	106716	251006	221325	71964.3	56389.8	80567.2	68478.5
C14843	1.02709e+06	661213	1.19549e+06	533277	522930	645873	447035	448660	452260	1.2026e+06	588172	895384
C14846	97312.7	38413.6	55949	52139	38751.5	53550.7	12161.1	9711.67	13403.4	40362	49588	44975
C14852	1.26317e+06	1.12767e+06	2.71046e+06	1.39268e+06	1.51357e+06	1.45756e+06	1.65735e+06	1.6797e+06	1.89959e+06	4.11065e+06	1.52884e+06	2.81974e+06
C14853	6.61291e+06	1.08395e+07	1.60025e+07	1.04602e+07	1.15222e+07	5.85649e+06	1.46704e+07	1.13901e+07	1.43637e+07	1.11212e+07	8.4619e+06	9.79155e+06
C14860	4.43806e+07	4.59567e+07	5.4435e+06	6.74156e+07	6.09992e+07	6.53424e+07	6.51915e+07	6.28637e+07	6.43142e+07	5.53319e+06	5.46714e+07	3.01023e+07
C14863	210096	83307.2	672225	74432.6	77255.5	97473.7	60267	60943.9	62009.3	807181	75740.4	441461
C14866	7.41795e+06	9.85665e+06	7.76247e+06	9.28818e+06	7.22104e+06	5.85252e+06	1.17888e+07	1.09089e+07	1.1848e+07	5.90233e+06	6.93843e+06	6.42038e+06
C14922	263587	234463	231690	212015	199733	1.09262e+06	213008	224952	216443	206141	222134	214137
C14923	573316	394910	625370	310533	298030	361802	251642	240655	236713	664266	292566	478416
C14960	152174	533914	421914	684889	547783	525806	914896	981689	746892	534433	610875	572654
C14973	67211.4	62845.2	97466.6	52805.7	50400.1	65111.8	54859.2	56262.6	54800.6	72864.8	55125.8	63995.3
C15021	376556	323755	311796	874237	687842	1.07957e+06	617478	568720	893907	219357	906907	563132
C15025	6.02323e+07	1.22607e+07	1.10493e+08	8.22096e+07	2.16417e+08	1.48763e+08	5.15391e+07	2.61835e+07	3.0813e+07	1.16669e+07	8.31934e+06	9.99311e+06
C15032	4.65538e+06	7.35208e+06	2.16699e+07	314646	553693	1.14184e+06	619444	525177	504504	9.58969e+06	1.29091e+07	1.12494e+07
C15066	5.96395e+06	272102	261075	3.67843e+06	2.38171e+06	3.02421e+06	1.34239e+06	372457	495321	271178	7.28931e+06	3.78025e+06
C15084	1.01168e+06	819070	707472	853229	820088	1.4837e+06	754928	714788	728652	574883	611079	592981
C15112	1.75977e+06	194977	994542	1.95933e+06	1.28839e+06	1.75488e+06	508458	318965	504170	1.55845e+06	1.92376e+06	1.7411e+06
C15117	2.76145e+06	990918	1.40748e+06	945934	820502	1.18652e+06	302599	241458	297198	968735	914187	941461
C15145	1.15879e+07	1.82766e+06	1.20666e+07	9.98475e+06	1.68352e+07	1.97645e+07	1.01342e+07	6.81936e+06	9.54052e+06	1.15505e+07	2.53713e+07	1.84609e+07
C15147	1.05919e+06	557300	585249	557044	468705	582101	347985	299254	322101	455246	562082	508664
C15152	1.58716e+06	500030	972761	378951	230781	2.01694e+06	563236	220939	431711	1.27609e+06	642054	959072
C15182	7.03869e+06	3.90964e+06	622922	1.06682e+06	1.86981e+06	1.71642e+06	317479	459911	342380	1.73219e+06	1.69101e+06	1.7116e+06
C15202	143379	81063.4	100037	34350.5	41781.2	123576	45394.1	40210.8	41445.4	71052.1	61907.1	66479.6
C15214	1.121e+06	2.38735e+06	422359	2.09398e+06	1.87501e+06	1.01241e+06	2.15933e+06	2.51407e+06	941919	647518	408192	527855
C15230	48077.9	43468.2	33605.4	68837.9	74456.2	54921.2	26518.6	25254.5	27157	36763.2	36303.5	36533.3
C15309	249113	159759	279944	130638	122584	221384	127134	127821	114664	312103	163624	237864
C15322	320152	309469	1.17774e+06	1.00699e+06	7.99307e+06	3.57582e+06	9.39176e+06	6.77021e+06	9.75847e+06	2.59544e+06	242870	1.41916e+06
C15346	62945.3	63607.1	89539.5	52229.9	53880	60853	53157.5	51582.3	51892.3	90121.8	52344.2	71233
C15358	712848	567154	681579	782852	1.01535e+06	1.00715e+06	586158	490103	570351	485608	572506	529057
C15381	107309	93764.2	564382	56157.5	35497.2	384850	28992.2	26877.1	39306.6	473333	50950.4	262142
C15390	307309	323324	220137	185246	183282	205351	164743	163190	162870	193003	229061	211032
C15424	1.64259e+06	774028	710428	540469	554445	774225	200674	137053	198458	578758	485800	532279
C15481	234521	141585	119721	166548	132672	165112	926576	633651	275566	166983	164676	165829
C15485	532449	1.08475e+06	461455	582798	696731	441412	505315	647607	866155	355876	380495	368185
C15486	1.41975e+06	626742	542276	4.58881e+06	4.97934e+06	4.48532e+06	453827	417070	414013	459609	466221	462915
C15493	86544.8	80147.7	101990	70757.3	68766.4	85216.3	69490.6	65634.3	65778.9	85466	70206.3	77836.2
C15494	1.10343e+07	5.72691e+06	5.72252e+06	5.56786e+06	1.32192e+07	1.56425e+07	1.67722e+07	1.57989e+07	1.63395e+07	9.02092e+06	5.50062e+06	7.26077e+06
C15497	205900	115877	199401	125095	439940	312833	471451	685914	485343	219825	143410	181618
C15502	1.27158e+07	2.66754e+07	6.6096e+06	2.45491e+07	1.92353e+07	1.69906e+07	3.48006e+07	8.83192e+07	4.07585e+07	1.16793e+06	1.33333e+07	7.25059e+06
C15503	18419	18488.9	21142.5	17688.6	15770.9	16335.2	15163.5	14833.1	15986	20184.9	16797.3	18491.1
C15514	283984	116087	116786	442126	3.04861e+06	1.85108e+06	123187	555160	843178	97430.7	228699	163065
C15545	531114	469640	868332	836038	769936	949215	807831	729788	820998	816946	776369	796657
C15546	1.45623e+06	691775	174688	551740	475618	571319	383164	401865	369270	97366.3	594607	345987
C15556	1.62007e+07	1.00805e+07	9.20222e+06	8.18045e+06	8.31158e+06	8.56764e+06	4.82332e+06	3.97874e+06	5.13051e+06	9.25964e+06	8.86043e+06	9.06003e+06
C15561	1.13144e+07	2.64737e+06	9.65203e+06	1.76715e+07	1.41755e+07	8.86989e+07	5.69195e+06	3.56623e+06	2.14478e+06	5.07408e+06	3.62541e+06	4.34975e+06
C15562	2.6641e+08	3.49568e+08	3.05331e+08	2.99542e+08	3.23148e+08	3.19201e+08	3.43593e+08	4.11959e+08	3.57861e+08	2.59144e+08	3.07217e+08	2.8318e+08
C15571	1.01481e+06	5.43746e+06	688253	733265	1.49661e+06	1.45595e+06	7.44974e+06	824333	7.95603e+06	951506	9.2352e+06	5.09335e+06
C15572	911660	572832	246598	476448	540133	547874	405654	401648	444938	198163	497590	347877
C15584	6.64798e+07	8.46103e+07	6.91899e+07	5.62911e+07	5.35432e+07	6.37964e+07	5.88621e+07	6.13814e+07	5.99451e+07	6.49371e+07	6.60735e+07	6.55053e+07
C15602	1.35397e+08	8.06426e+07	2.09841e+08	1.71833e+08	1.82755e+08	2.0295e+08	9.60546e+07	7.09917e+07	9.46617e+07	2.49182e+08	1.93415e+08	2.21299e+08
C15603	1.67337e+06	1.45402e+06	1.41458e+06	2.87326e+06	1.12088e+06	4.34944e+06	1.14212e+06	1.11386e+06	1.07137e+06	1.0302e+06	1.0829e+06	1.05655e+06
C15604	2.44574e+07	2.2145e+07	2.75508e+07	2.368e+07	5.19004e+07	3.39686e+07	1.46019e+07	2.86139e+07	1.60903e+07	1.29822e+07	6.78307e+07	4.04064e+07
C15607	5.1572e+06	2.28242e+06	1.49813e+06	2.6184e+06	3.01079e+06	2.84961e+06	1.6919e+06	1.92307e+06	1.54497e+06	1.86124e+06	1.80601e+06	1.83363e+06
C15612	321978	300753	301558	250826	263037	250343	278202	284789	282526	273549	260995	267272
C15617	2.96215e+06	681429	547220	4.25903e+06	3.85941e+06	2.3711e+06	1.94606e+06	1.26581e+06	2.35445e+06	629926	557708	593817
C15622	1.76569e+06	168848	680570	1.3288e+06	1.22755e+06	1.34707e+06	684882	412679	656610	1.29684e+06	1.34219e+06	1.31951e+06
C15626	2.6389e+06	2.1548e+06	900198	1.48738e+06	1.41992e+06	1.41001e+06	1.27389e+06	1.45578e+06	1.22797e+06	630048	1.58715e+06	1.1086e+06
C15656	312778	279720	228021	246819	270360	307285	238497	294735	229611	215548	255484	235516
C15668	2.54464e+08	2.95678e+08	2.92969e+08	1.16617e+08	2.77204e+08	2.61037e+08	3.31705e+08	9.11586e+07	3.30733e+08	2.3043e+08	4.63601e+07	1.38395e+08
C15679	2.4534e+06	364179	928649	1.37916e+06	2.07924e+06	1.59027e+06	602300	383016	473128	465508	1.91483e+06	1.19017e+06
C15689	458027	192455	97203.2	138007	115971	140246	79443.7	68833.2	75977	66016.5	139995	103006
C15694	272181	1.04786e+07	77889.9	292090	1.37239e+06	366333	398688	53775.4	56567.8	106131	384115	245123
C15698	906600	324822	577371	405957	377688	3.30049e+06	257034	266161	277408	451471	430160	440816
C15700	2.99234e+06	3.15198e+06	5.20419e+06	5.1395e+06	1.92143e+06	2.88565e+06	3.28436e+07	1.13694e+07	4.82259e+06	8.47483e+06	6.98163e+06	7.72823e+06
C15719	88604.1	94306.8	90657.9	80487.8	82470.6	211525	83045	82370.6	84995.3	80733	80885.5	80809.3
C15724	1.09129e+06	751702	1.24731e+06	591092	567293	2.93884e+06	478995	483929	450577	2.65882e+06	575357	1.61709e+06
C15725	1.18854e+06	807107	1.13878e+06	777723	703865	1.02873e+06	523992	535745	555162	1.18683e+06	660526	923679
C15730	6.40159e+06	1.01713e+06	264506	1.32647e+06	679235	571023	210675	189195	193608	2.2888e+06	496834	1.39282e+06
C15738	421455	205615	399090	175103	160202	548929	152642	143954	143229	341058	208392	274725
C15739	4.01106e+07	2.61929e+06	927650	1.63643e+06	1.6363e+06	4.10922e+06	511323	1.29098e+06	746656	733815	1.96609e+06	1.34995e+06
C15746	241774	195742	154750	218031	184967	294116	182522	130297	164100	110636	146036	128336
C15747	973658	917777	778297	612148	575050	640547	495046	462484	479912	616531	662880	639706
C15758	664093	264999	377635	296109	267988	425273	1.39605e+06	781522	1.37292e+06	427404	1.25866e+06	843031
C15760	3.89082e+06	311801	1.33887e+06	4.26884e+06	2.63298e+06	1.50229e+06	1.20303e+06	366002	526201	990845	4.69705e+06	2.84395e+06
C15767	868201	702904	631642	732219	676110	1.08324e+06	629012	613413	569618	493350	524412	508881
C15808	790752	635948	605324	342334	614416	771354	941386	6.29611e+06	1.08276e+06	137913	252151	195032
C15809	4.70582e+06	7.3915e+06	6.89503e+06	237482	287507	400591	284732	249828	269924	359454	1.1406e+07	5.88274e+06
C15823	1.09687e+09	5.21791e+06	2.66853e+08	2.94098e+08	1.94844e+08	2.05007e+08	6.41137e+07	3.76936e+07	8.62314e+07	1.13982e+08	2.82068e+08	1.98025e+08
C15846	2.63049e+06	1.43552e+06	6.65345e+06	9.33283e+06	7.75862e+06	8.88577e+06	2.73607e+07	4.00746e+07	3.01967e+07	6.48635e+06	1.03392e+07	8.41279e+06
C15849	319047	269646	354913	195611	203391	236731	181033	194530	187493	326081	206429	266255
C15850	5.57778e+06	3.91088e+07	1.34184e+06	2.06692e+06	9.293e+06	7.74646e+06	1.26128e+06	1.31251e+06	1.16654e+06	1.10069e+06	2.39965e+07	1.25486e+07
C15877	6.13688e+06	2.84238e+06	2.76316e+06	2.13848e+06	2.00604e+06	3.36562e+06	752023	549390	800065	2.11452e+06	1.96375e+06	2.03914e+06
C15892	929250	538069	334237	523693	433206	586470	275553	186058	229151	373763	509570	441666
C15900	6.95556e+06	3.5843e+06	2.58316e+06	3.10495e+06	2.39099e+06	3.61226e+06	1.22895e+06	922660	1.20556e+06	2.21121e+06	2.65033e+06	2.43077e+06
C15903	1.64254e+06	3.58155e+07	1.71222e+06	1.82612e+07	2.10467e+07	2.29032e+07	3.24389e+06	1.49766e+06	6.9921e+06	3.04539e+07	8.16238e+06	1.93081e+07
C15935	991577	1.03257e+06	511785	803476	809306	802795	826328	782794	809796	436099	781846	608973
C15943	1.0111e+06	601097	856589	671663	607877	661127	468312	5.2495e+06	479453	969480	570449	769964
C15970	463415	281924	202091	206868	208359	229682	166513	154482	163706	227827	215074	221450
C15971	582039	557155	171402	324815	302866	2.67649e+06	107760	87109.6	164452	220955	261981	241468
C16038	247828	218858	183377	209880	218586	259572	191802	237029	184655	173346	187201	180273
C16146	1.09398e+06	589499	2.58635e+06	596918	549845	673792	349328	391752	420151	2.28417e+06	681749	1.48296e+06
C16147	70346.1	69674.5	129713	57674.6	55094.6	65582.8	57961.3	55773.1	55613.5	98550.3	58944.4	78747.4
C16150	1.01578e+08	1.2636e+08	1.21555e+08	9.51001e+07	1.09876e+08	1.04826e+08	1.56571e+08	1.53108e+08	1.53636e+08	9.08773e+07	9.54064e+07	9.31418e+07
C16155	7.37607e+06	2.69705e+06	3.83464e+06	2.67243e+06	2.2879e+06	3.26722e+06	832926	679090	816002	2.579e+06	2.69078e+06	2.63489e+06
C16159	884669	409779	705619	424123	379433	498807	298986	297504	289954	551068	504041	527554
C16185	6.47016e+07	63805.6	256721	1.15323e+07	4.13637e+06	3.60125e+06	1.19651e+07	3.24818e+06	2.10023e+07	203054	1.27215e+07	6.46228e+06
C16223	5.08267e+06	912230	5.6291e+06	959736	1.27756e+06	3.18088e+06	5.05825e+06	3.40371e+06	4.76191e+06	5.76514e+06	2.22001e+06	3.99257e+06
C16246	1.2986e+06	863826	1.0381e+06	1.19235e+06	1.54646e+06	2.60399e+06	892771	746469	868695	739624	871978	805801
C16250	342855	449919	1.14427e+06	227684	129649	166620	98349.6	99454.2	180526	1.45289e+06	313000	882946
C16280	5.49174e+06	2.60934e+06	2.63392e+06	1.73895e+06	1.70909e+06	2.5536e+06	633379	469538	626631	2.02283e+06	1.74311e+06	1.88297e+06
C16308	752117	281917	186288	222699	185239	1.90755e+06	147493	148441	148829	158431	192190	175311
C16323	424113	398681	403779	431002	267433	361776	291852	283771	252764	553838	496800	525319
C16365	474759	1.90325e+06	407407	341370	465305	1.88363e+07	283947	286190	300292	317421	300246	308834
C16366	339565	272343	223064	703173	232640	7.50501e+06	178691	160693	170453	187161	210877	199019
C16392	1.42986e+07	2.67502e+06	8.42891e+06	5.06258e+06	5.70805e+06	1.71174e+06	611263	832641	4.34236e+06	1.68964e+07	1.41115e+07	1.55039e+07
C16395	688879	3.87767e+06	1.05941e+06	818038	4.48065e+06	4.412e+06	6.46787e+06	1.09364e+07	6.37381e+06	388745	1.7277e+06	1.05822e+06
C16396	1.06474e+08	7.76125e+07	5.68622e+07	1.68464e+08	1.46942e+08	1.30702e+08	1.35412e+07	1.63409e+06	1.08823e+07	2.96629e+08	2.30681e+08	2.63655e+08
C16407	896237	165072	180321	140497	133819	139977	147702	158336	148116	154565	137875	146220
C16408	636764	479310	91714.9	99270	166495	436158	72615	72593.2	73272.8	76088.7	496480	286284
C16415	1.72747e+06	1.90575e+06	2.49989e+06	1.39561e+06	212979	252853	2.24638e+06	1.51159e+06	2.11477e+06	2.56031e+06	2.31971e+06	2.44001e+06
C16417	2.90945e+06	1.04403e+06	1.48291e+06	996631	864476	1.25011e+06	318817	254399	313127	1.02065e+06	963183	991918
C16440	5.16042e+06	5.20706e+06	2.64968e+06	1.28418e+07	7.08713e+06	4.76428e+07	5.8942e+06	2.93267e+06	1.84369e+06	669674	2.91963e+06	1.79465e+06
C16448	1.18747e+06	470368	589012	384174	326991	3.67901e+06	129106	97827.5	125389	357927	380038	368982
C16449	367816	291532	263153	289567	282361	442448	241132	244772	216437	213835	218484	216159
C16450	8.65347e+07	3.13611e+07	3.15573e+07	6.2408e+07	7.66836e+07	9.28577e+07	3.23727e+07	1.91208e+07	3.22874e+07	7.35117e+07	1.19223e+08	9.63672e+07
C16476	1.81993e+06	1.79352e+06	1.65402e+06	1.41578e+06	1.42711e+06	1.4293e+06	1.31666e+06	1.33796e+06	1.30238e+06	1.28694e+06	1.41125e+06	1.3491e+06
C16483	3.66982e+06	1.78172e+06	1.06973e+06	450607	1.09652e+06	4.19333e+06	572978	509673	320492	889135	808292	848714
C16485	814226	572399	321093	1.09437e+06	488413	655688	294050	273119	293616	359940	383868	371904
C16488	338063	250993	1.19217e+06	107141	128029	149951	96945	92667.6	97222.4	1.15356e+06	134041	643800
C16517	486407	393800	328926	410223	394290	610382	367202	338499	350328	265418	293800	279609
C16521	3.8641e+08	5.67055e+08	5.0717e+07	2.87172e+08	1.63159e+08	3.11249e+09	8.07868e+07	5.08487e+07	3.88656e+07	1.46096e+08	2.22041e+08	1.84068e+08
C16525	2.14846e+06	906707	181249	3.51595e+06	2.3962e+06	2.76551e+06	140476	136946	705565	133730	686655	410193
C16527	7.27489e+06	6.63635e+06	5.08459e+06	7.14054e+06	6.56059e+06	6.88781e+06	4.1915e+06	3.54435e+06	3.94235e+06	5.23766e+06	6.79006e+06	6.01386e+06
C16533	496635	479653	412614	316322	352279	368623	383603	353332	378410	310513	319205	314859
C16536	792340	925941	334541	6.08305e+06	452218	1.36083e+06	1.29807e+06	1.55133e+06	793489	1.94683e+06	1.02907e+06	1.48795e+06
C16538	240303	277080	926218	191613	195709	184232	197980	191517	179566	514501	199957	357229
C16542	672478	710272	624462	557490	535043	570218	541741	541233	545465	502610	563788	533199
C16543	3.45151e+06	771836	1.28505e+06	1.49631e+06	3.27447e+06	1.50656e+06	6.23097e+06	4.54858e+06	5.46513e+06	1.02119e+06	1.47107e+06	1.24613e+06
C16546	3.95803e+06	1.41559e+06	2.05768e+06	1.35133e+06	1.17214e+06	1.72054e+06	432282	344938	424567	1.3839e+06	1.30598e+06	1.34494e+06
C16547	2.01608e+07	1.61074e+06	348128	1.77393e+06	419150	433223	607225	1.38517e+06	1.54633e+06	349049	361898	355474
C16562	5.01674e+08	6.27652e+07	3.23608e+09	2.22377e+09	9.79027e+07	9.27313e+07	1.4906e+08	4.22235e+08	1.67745e+08	1.58557e+08	2.39646e+09	1.27751e+09
C16563	6.64304e+06	301460	3.69979e+06	9.68043e+06	6.17466e+06	6.31156e+06	2.71135e+06	1.90596e+06	2.20199e+06	5.02223e+06	1.15498e+07	8.28602e+06
C16566	1.88743e+06	1.58172e+06	7.33105e+06	1.02833e+07	8.54879e+06	9.79073e+06	4.93988e+06	9.34699e+06	5.21567e+06	7.14694e+06	1.13922e+07	9.26957e+06
C16589	372870	204366	179666	447767	175275	226846	449255	363134	108675	141905	209192	175549
C16612	45953.6	44935.3	47416.8	38211.6	39378	36675.6	41929.8	40831.7	43399.6	41328.9	39080.7	40204.8
C16644	1.7689e+06	1.03791e+06	1.73892e+06	1.18542e+06	1.04542e+06	1.12723e+06	759676	712276	834671	1.92256e+06	1.23205e+06	1.5773e+06
C16671	820821	744115	665930	522637	527063	537196	675695	552062	552675	543512	511247	527379
C16692	571434	497826	675366	330443	337427	375368	348811	376269	341062	1.52492e+06	378898	951907
C16712	1.5317e+06	1.30707e+06	6.87993e+06	9.65052e+06	8.02273e+06	8.45434e+06	3.42513e+06	2.82537e+06	3.64327e+06	6.59751e+06	1.06912e+07	8.64434e+06
C16746	5.59121e+06	2.12475e+07	1.29332e+06	1.54624e+07	5.71046e+06	2.47002e+07	1.02293e+07	9.58657e+06	1.16037e+07	1.08737e+06	2.31681e+07	1.21277e+07
C16765	711983	341852	258877	393616	452603	419712	199321	178740	211944	279795	266736	273266
C16766	2.22615e+07	235439	4.61798e+06	1.0399e+07	6.42449e+06	8.43572e+06	3.68572e+06	2.19881e+06	2.80628e+06	1.44656e+06	1.82623e+07	9.85442e+06
C16785	4.64311e+07	1.55413e+08	6.43713e+08	3.18944e+07	9.99928e+07	1.09676e+08	4.46001e+07	3.16029e+06	5.84147e+07	1.18171e+08	6.22985e+07	9.02349e+07
C16806	623077	504450	421348	1.16422e+07	1.41913e+07	1.62639e+06	1.68773e+06	1.09269e+06	2.11513e+06	339996	376352	358174
C16831	1.30527e+06	581215	740491	648701	541912	709525	408161	382009	407342	585763	721277	653520
C16837	1.11663e+06	1.05409e+06	3.02723e+06	226158	351519	3.58967e+06	194501	242968	3.13949e+06	403675	232468	318071
C16838	24586.1	24423	175569	172214	53267	66114	70283.1	68091	70630.9	309443	64244.1	186844
C16843	205922	776437	475957	734523	5.53729e+06	1.26803e+06	728972	751020	2.41988e+06	195826	341130	268478
C16850	824642	462824	335841	545340	433342	568383	237295	187184	240317	326692	521423	424058
C16852	1.26289e+06	1.04776e+06	787721	990665	963913	1.11739e+06	583337	567647	595302	846177	1.14889e+06	997531
C16868	196913	192980	197437	158886	166621	607780	176227	175371	170349	173279	165203	169241
C16884	308875	330101	809908	226323	221914	227778	225925	231549	223797	480747	236674	358711
C16903	111768	99194.9	94194.9	89697.5	84219.1	181660	90363.2	89738.1	87839.1	85125.9	86726.8	85926.3
C16910	415197	335795	2.73798e+06	1.77518e+07	8.52977e+06	716947	257428	234624	252882	2.57675e+06	280425	1.42859e+06
C16915	447017	136784	258606	112527	112276	132970	118740	115230	113133	213692	117138	165415
C16919	287085	301406	298655	190841	204294	227265	211186	213763	205625	268498	229402	248950
C16921	1.8802e+07	3.74847e+07	790703	8.21503e+06	2.94258e+07	2.53566e+07	3.30342e+06	2.48372e+06	3.74296e+06	2.70844e+07	3.84685e+06	1.54656e+07
C16923	2.6932e+06	1.41217e+06	948115	1.23421e+06	975706	1.45994e+06	1.95263e+06	1.45568e+06	1.83658e+06	869722	1.10027e+06	984997
C16924	441872	512008	1.13477e+06	1.24919e+06	1.26921e+06	1.30832e+06	585016	663656	1.28824e+06	1.2272e+06	1.33374e+06	1.28047e+06
C16931	2.95112e+06	369858	744623	1.58012e+06	1.60642e+06	493538	1.04171e+06	972736	223680	218373	415867	317120
C16939	845536	556106	697859	243098	244665	168720	314291	252939	235746	259545	245385	252465
C16985	979667	738908	3.09618e+06	502366	486406	540660	461980	1.46364e+06	484392	3.01897e+06	518085	1.76853e+06
C16993	9.27157e+07	1.48406e+06	5.57155e+06	1.94535e+07	6.90673e+06	8.59025e+06	1.10553e+06	1.1653e+06	1.48844e+06	1.10628e+07	1.93033e+07	1.5183e+07
C16994	5.7132e+07	7.56741e+07	7.88306e+07	3.24778e+07	5.96482e+07	2.72334e+07	5.68306e+07	2.83275e+07	8.43543e+07	3.40966e+07	3.56445e+07	3.48705e+07
C16996	1.83959e+07	1.31103e+07	1.04491e+07	9.81565e+06	9.43781e+06	1.07457e+07	1.17183e+07	1.01966e+07	1.14537e+07	9.84225e+06	1.09133e+07	1.03778e+07
C17007	172008	142461	151747	108161	107561	122954	111638	101580	107462	106911	117324	112118
C17008	113666	101268	100799	87800.6	86625.8	166547	90882.5	97724.1	90771.1	87562.7	91593.4	89578.1
C17038	3.07655e+08	329832	9.40358e+07	9.7022e+07	5.31968e+07	8.53527e+07	3.13073e+07	2.30621e+07	2.43683e+07	2.38251e+07	1.28076e+08	7.59508e+07
C17047	8.16572e+06	1.85296e+07	4.02143e+06	1.08204e+07	5.61064e+06	8.03375e+06	4.09558e+06	5.35929e+06	3.17956e+06	3.84942e+06	8.45548e+06	6.15245e+06
C17050	2.48823e+06	889916	1.29357e+06	849518	736870	1.08163e+06	273000	216119	275269	837262	810383	823822
C17101	883370	844244	573428	920410	870529	1.06668e+06	774759	878904	711667	614550	652786	633668
C17103	299573	1.44123e+06	664482	331084	279470	441733	667103	232038	280482	305804	321736	313770
C17167	546536	349328	284807	279876	264929	280424	199325	172819	204191	274781	297546	286163
C17168	1.09021e+06	683557	869471	771339	972117	1.28781e+06	749502	626678	729289	613372	498457	555914
C17208	334561	351343	501617	296924	286292	327377	301587	300925	311715	841856	301720	571788
C17220	597468	530258	528757	479489	465925	501157	486314	508746	503229	466204	502375	484289
C17222	551373	206068	113464	151446	120968	144141	77704.3	80649.6	77505	86338.3	136924	111631
C17224	4.44181e+06	1.28744e+06	5.93727e+06	1.02683e+07	6.05578e+06	2.17224e+06	7.6781e+06	8.55961e+06	3.30814e+06	8.33994e+06	7.3746e+06	7.85727e+06
C17226	2.45555e+07	3.40384e+06	189043	244152	215499	320843	161597	143874	138182	203553	1.51269e+06	858122
C17233	360167	281772	303718	190791	200608	212399	210537	239741	223159	221734	210692	216213
C17241	766250	538672	274160	384396	361500	676314	237402	250399	225840	333815	378232	356023
C17251	215709	3.14651e+06	155296	3.59311e+06	124069	1.64561e+06	123691	108524	113670	141559	871265	506412
C17309	268932	290412	202948	847112	498404	931428	151172	135725	150153	183430	703394	443412
C17359	9.161e+07	790252	1.52439e+07	1.2127e+07	4.09195e+07	6.80709e+08	1.82827e+06	5.76775e+06	3.55981e+06	1.11661e+07	3.0293e+07	2.07295e+07
C17362	1.97613e+06	249522	265420	395153	427404	315266	152226	144969	155890	3.18697e+06	208394	1.69768e+06
C17370	752817	371365	760467	885902	421288	762132	1.33323e+06	1.0161e+06	398221	709150	522911	616030
C17391	1.30442e+07	4.41245e+06	2.94757e+06	6.83667e+06	6.77824e+06	7.31604e+06	3.49256e+06	2.5395e+06	3.37741e+06	2.80365e+06	7.6651e+06	5.23437e+06
C17397	700120	432426	550037	1.55876e+06	980942	367092	1.16282e+06	407649	1.018e+06	1.34495e+06	315329	830139
C17399	1.29031e+06	149604	151430	136997	133915	128346	136236	137398	134436	132599	136213	134406
C17403	735102	551371	670427	919396	1.02746e+06	1.9196e+06	468162	394364	433119	527570	460454	494012
C17444	438354	233810	148934	182051	146112	206358	70059.9	48160.4	74209.1	124667	150615	137641
C17450	1.14006e+06	685966	503613	491954	423730	689781	363542	351419	335008	398441	505805	452123
C17452	91157.4	77889.2	75555.5	70494.2	69174.8	75810.3	73875.9	71686.4	73025.4	71493.9	77040.8	74267.4
C17476	2.13106e+06	1.59692e+06	646443	992025	725271	936120	443548	418489	455303	576473	1.03392e+06	805194
C17489	1.26392e+06	954406	1.0674e+06	1.04049e+06	1.07659e+06	1.15748e+06	736445	755836	925365	1.23732e+06	1.31888e+06	1.2781e+06
C17507	276479	105325	1.37398e+06	158988	104002	126756	82036.3	82580.8	89901	1.3499e+06	623120	986511
C17533	1.29396e+06	566121	317643	412880	364425	875049	256091	245324	258043	344223	415444	379834
C17540	6.73115e+07	8.72391e+07	5.62278e+07	7.56048e+07	6.90275e+07	7.98341e+07	1.05091e+08	2.26622e+07	1.077e+08	8.12611e+07	1.01333e+08	9.12971e+07
C17547	1.30081e+08	340225	7.82418e+07	8.17362e+07	5.39608e+07	6.80124e+07	4.0204e+07	2.32791e+07	1.64757e+07	2.07912e+07	1.19876e+08	7.03335e+07
C17569	1.36388e+06	1.30448e+06	1.51193e+06	1.01779e+06	1.03015e+06	1.0541e+06	946766	959587	976458	1.18129e+06	1.04287e+06	1.11208e+06
C17575	207714	178755	179621	139125	136383	138769	148484	141082	132843	133207	126986	130097
C17614	4.15953e+06	3.16887e+06	3.75209e+06	8.70502e+06	9.66956e+06	5.26617e+06	2.12242e+06	1.7158e+06	1.57792e+06	498678	1.09531e+07	5.72591e+06
C17619	264286	283424	218805	174256	174243	241290	160527	150420	145426	169309	186300	177805
C17685	2.26147e+06	2.13167e+06	1.80771e+06	1.52093e+06	1.3999e+06	1.48777e+06	1.14982e+06	1.07419e+06	1.13849e+06	1.43199e+06	1.53964e+06	1.48581e+06
C17702	2.48278e+06	74763.2	1.94123e+06	969136	1.30195e+06	4.64383e+06	1.7012e+06	9.77939e+06	1.2612e+07	1.14722e+06	7.95649e+06	4.55185e+06
C17703	1.0357e+06	830474	1.05584e+06	704946	694126	734507	1.13035e+06	1.7005e+06	1.55506e+06	689991	757214	723603
C17705	7.76876e+06	371777	638908	5.92351e+06	6.49516e+06	4.83935e+06	2.08148e+06	195495	613853	346705	8.72495e+06	4.53583e+06
C17710	1.14623e+08	1.28367e+06	2.02974e+07	3.36827e+07	1.77902e+07	2.15221e+07	3.90124e+06	1.00795e+06	4.15251e+06	1.21782e+07	3.60467e+07	2.41125e+07
C17715	851517	315993	3.909e+06	2.08777e+07	1.10071e+07	6.10018e+06	7.35727e+06	2.20876e+06	1.95203e+06	4.27299e+06	2.41367e+07	1.42048e+07
C17770	1.99723e+06	1.03658e+06	344367	932940	791012	901132	393762	332161	367994	174782	948369	561576
C17816	655415	249540	6.11415e+06	461350	382700	494785	206212	189986	206464	4.68484e+06	583006	2.63392e+06
C17854	568202	557605	638773	504282	485451	524278	513444	516438	509116	563852	488518	526185
C17868	2.49304e+06	88739.6	1.5624e+06	1.42329e+06	1.56356e+06	357500	504662	148320	150078	1.65345e+06	614496	1.13397e+06
C17877	2.23129e+06	1.09917e+06	651348	1.12766e+06	1.09725e+06	1.16061e+06	814788	926115	713135	667682	869744	768713
C17928	1.28223e+06	864467	385059	175137	204544	200524	222231	196856	202900	313732	845339	579535
C17938	182868	153974	90242	124740	125736	144385	117515	135700	108324	104466	136081	120273
C17940	45123.2	40916.9	69732.8	34386.4	34910.5	40737.4	35668.6	34397.1	35476.6	74960.2	34878	54919.1
C17944	2.22028e+08	8.75602e+07	2.77961e+07	1.01329e+08	8.42245e+07	6.35165e+07	7.43328e+07	4.94634e+06	8.29032e+07	3.58868e+08	1.29822e+08	2.44345e+08
C17948	588392	382703	460377	822311	168214	2.41972e+06	182760	262450	166862	324436	249243	286839
C17950	162446	139784	113304	221367	239434	212926	85277.9	81212.7	87330.5	121758	110898	116328
C17954	101830	91379	3.9882e+06	127788	57163	76610.2	44367.1	45060.6	41158.4	1.90766e+06	77844.8	992750
C17958	3.4696e+06	1.31647e+06	1.22888e+06	2.42479e+06	1.75998e+06	2.53922e+06	2.40226e+06	439931	1.91636e+06	1.07797e+06	3.19567e+06	2.13682e+06
C17967	453933	455111	426096	401215	390653	392449	397594	426385	388557	379805	390756	385281
C17972	340159	213543	282910	155035	705979	739115	150766	146823	141749	339190	165136	252163
C17980	1.50864e+06	1.23087e+06	6.15216e+06	8.62968e+06	7.17407e+06	8.2163e+06	3.20966e+06	2.0873e+06	3.19559e+06	5.99765e+06	9.56025e+06	7.77895e+06
C18012	229737	219562	148988	227418	199797	1.46446e+06	201491	228576	182827	159369	163589	161479
C18021	289049	191339	243379	73111.3	88926.7	102506	96616.3	85584.2	88212	171692	128109	149901
C18032	1.48556e+07	4.4184e+07	4.21841e+07	4.20115e+07	3.91844e+07	3.89056e+07	4.64078e+07	4.21453e+07	5.0332e+07	2.32359e+07	3.25629e+07	2.78994e+07
C18053	4.88589e+07	1.77717e+06	3.182e+06	2.07362e+06	1.91337e+06	2.34358e+06	1.45839e+06	1.34838e+06	1.34821e+06	2.96727e+06	2.25154e+06	2.60941e+06
C18069	7.31984e+06	2.97413e+06	5.0713e+06	3.30482e+06	3.04943e+06	3.95529e+06	2.32691e+06	2.14897e+06	2.1487e+06	5.01289e+06	4.04708e+06	4.52999e+06
C18081	744049	477264	398262	693922	602435	801685	380593	306243	343507	313444	357259	335352
C18099	101636	137520	61802.3	111534	111575	113276	92527.1	99341	88853.6	58735.7	96767.2	77751.4
C18128	140112	58450.3	82976.2	905460	109678	172806	112535	41721.3	81075.7	85222.6	809778	447500
C18145	8.27421e+06	4.29441e+06	3.30408e+06	4.17514e+06	3.42433e+06	3.7976e+06	1.85304e+06	1.59488e+06	1.73618e+06	1.84622e+06	4.12472e+06	2.98547e+06
C18178	330953	145354	258367	150101	147312	771976	110048	105973	118371	198555	192491	195523
C18203	2.09004e+06	1.39424e+06	1.60842e+06	2.16057e+06	1.31664e+06	2.40124e+06	760094	635534	739595	2.53958e+06	1.192e+06	1.86579e+06
C18213	362817	243572	296730	175701	194569	334358	189423	181187	174781	216681	225692	221187
C18236	4.18103e+07	3.89492e+07	3.81289e+07	7.69499e+07	6.335e+07	7.90176e+07	5.36927e+07	5.60724e+07	2.0036e+06	4.53989e+07	3.61518e+07	4.07754e+07
C18241	244982	233168	210137	165448	162142	210691	136636	141897	134633	157055	157835	157445
C18261	4.19263e+06	1.71636e+06	1.39614e+06	1.28708e+07	1.27447e+07	1.30605e+07	1.90411e+06	1.8039e+06	1.43423e+06	1.22498e+06	1.2676e+06	1.24629e+06
C18281	254959	238884	252672	188010	177074	193505	209482	210316	210928	148242	175414	161828
C18282	1.33126e+08	1.6132e+08	1.761e+08	1.50765e+08	1.50659e+08	1.44418e+08	2.58926e+08	2.60969e+08	2.50306e+08	1.37765e+08	1.32333e+08	1.35049e+08
C18299	127762	62623.3	63516.8	55157.6	55242	52790.2	56912.9	58160.9	56985.8	55305	53717.6	54511.3
C18339	675142	447229	168718	51826	47568.7	50168	47561.2	48902.8	48541.8	141054	557902	349478
C18363	956277	911313	876500	697227	657291	768880	612067	613755	577089	651143	663439	657291
C18374	329518	282734	167446	215367	238309	277185	218186	268867	202561	189172	230658	209915
C18377	345097	290145	138680	251702	245767	233544	198132	198071	212449	104312	236780	170546
C18390	1.58089e+07	417774	678258	6.01381e+06	5.31592e+06	4.15483e+06	1.00062e+06	726726	769989	344472	8.8946e+06	4.61954e+06
C18399	2.29646e+08	3.76389e+08	3.70064e+08	3.28065e+08	3.23699e+08	3.6094e+08	3.21428e+08	3.11177e+08	3.15102e+08	3.32565e+08	3.59468e+08	3.46017e+08
C18409	1.17089e+06	462713	630747	556374	485488	720074	149094	125379	145378	422285	559143	490714
C18412	2.19472e+07	4.21381e+06	4.2493e+06	3.89214e+07	4.05189e+07	3.795e+07	2.48998e+06	2.55506e+06	7.64491e+06	534385	8.37463e+06	4.45451e+06
C18416	3.91485e+06	3.87026e+06	793740	1.69718e+06	1.32331e+06	1.56963e+06	531143	346893	523279	1.15828e+06	1.66855e+06	1.41342e+06
C18435	1.02668e+07	2.46056e+06	4.55847e+06	118246	114880	252998	119037	110130	110159	3.82924e+06	3.65007e+06	3.73966e+06
C18445	208646	132659	110507	107277	105937	108696	140901	109945	115229	94217.9	110381	102299
C18457	90806.9	114718	80527	70143.1	69204.6	69699.7	72605.2	188075	72144.6	110943	84220	97581.6
C18461	327016	318739	353404	223097	213068	235749	231225	212302	210575	274725	213003	243864
C18463	6.44409e+08	1.01885e+09	3.68633e+08	2.18393e+08	2.19514e+08	1.44427e+08	2.70801e+08	3.30395e+08	2.58448e+08	2.95691e+08	7.16283e+08	5.05987e+08
C18488	6.88565e+07	2.32419e+07	2.04728e+07	1.51414e+07	2.74533e+07	1.78245e+07	2.64705e+07	1.88963e+07	8.34918e+06	1.51698e+07	4.11707e+07	2.81702e+07
C18495	9.97592e+07	4.07476e+07	355968	391698	1.16617e+06	598500	2.99041e+06	340461	328886	1.82074e+06	1.33432e+07	7.58199e+06
C18499	1.64484e+07	2.42488e+06	3.5194e+06	8.75859e+06	3.02257e+07	2.75924e+07	230052	216524	244621	564157	850699	707428
C18511	188827	89952.5	888683	74553.4	72809.6	86742.9	64844.9	64383	64668.6	739486	75256	407371
C18514	645720	617120	419161	672795	1.24108e+07	779714	3.15443e+06	642456	520210	447937	477169	462553
C18542	159716	145681	164470	109600	98096.4	112102	101141	104232	106373	131993	102252	117123
C18544	3.88162e+06	651124	513603	533622	645036	816705	914463	2.56833e+06	907133	1.54397e+06	1.05468e+06	1.29933e+06
C18547	735651	325577	192930	334015	334703	1.20715e+06	241341	253418	211232	195101	250436	222769
C18557	9.72001e+07	4.46335e+07	1.53126e+07	4.05825e+07	2.7771e+07	3.9062e+07	5.33155e+06	1.42945e+07	1.7153e+07	5.28057e+07	2.1394e+07	3.70999e+07
C18560	3.14591e+06	327989	368169	1.04276e+06	352666	1.04907e+06	684448	498883	478795	272769	330253	301511
C18573	74542.2	79571	82533.2	64786.2	64797.2	61297.7	69570.3	70003.4	72333.5	70872.1	66484.6	68678.4
C18581	2.13439e+06	944615	599595	969097	942959	1.11693e+06	700218	795891	639410	658664	747446	703055
C18592	557608	426255	221404	246945	228148	496220	156192	165275	166371	217735	333756	275746
C18600	197622	264114	118212	213431	214648	218401	363424	196069	177321	112347	185092	148719
C18603	1.21919e+06	232100	412557	1.24712e+06	1.33169e+06	2.60268e+06	348096	190184	398504	322596	410827	366711
C18613	822768	271278	253511	917693	377795	648546	255580	200730	594340	214463	244459	229461
C18615	564283	449345	515244	711601	795240	719522	362351	305233	335229	408333	356491	382412
C18651	372831	254785	182491	286835	257683	250789	173803	175503	160289	182642	219440	201041
C18659	375124	331273	277568	341730	374117	506900	288288	358777	279502	262384	283356	272870
C18663	62828.4	62043.3	72025.8	55395.1	55075.9	59814.1	56124	58307.9	57268	62361	55386.6	58873.8
C18667	53318.6	48747.3	120677	79595.1	144940	108761	131246	134376	236865	280043	41683.2	160863
C18692	1.12411e+06	591456	621118	591185	497431	617777	369313	317595	341842	483148	596531	539840
C18704	773434	525737	273076	325575	340157	2.57608e+06	215542	203847	207954	268551	411650	340101
C18731	1.24835e+07	3.98355e+06	744201	1.37146e+06	1.37021e+06	1.67837e+06	865638	696535	781290	835933	3.59551e+06	2.21572e+06
C18741	340643	377213	360366	425738	552174	626231	308390	242206	281542	258777	294970	276874
C18744	60289.6	64028.3	64175.7	39469.3	38837.5	40561.3	38897.3	42578.5	39492.4	164015	47844.3	105929
C18745	3.18539e+06	1.40976e+06	925335	1.61728e+06	1.85964e+06	1.76009e+06	1.04501e+06	1.1878e+06	954264	1.14961e+06	1.1155e+06	1.13256e+06
C18749	238102	161405	241976	334192	373472	327714	127878	127368	139605	191767	167371	179569
C18750	780772	404624	245080	387828	377072	457500	320799	356600	293211	274523	357602	316062
C18760	1.28405e+07	1.55995e+07	1.63342e+07	1.13377e+07	1.03864e+07	2.83439e+06	7.49539e+06	1.52996e+06	8.36259e+06	2.84867e+07	1.93939e+07	2.39403e+07
C18780	140647	160359	107869	97916.9	92218.2	228013	83211.1	84449.6	80634.7	95793.6	105407	100600
C18781	60634	306358	124792	42186.6	40196	63462.1	52692.4	48503.1	46925.5	67656.5	38346	53001.3
C18793	2.6827e+06	1.18728e+06	895806	1.36205e+06	1.56617e+06	1.48233e+06	880100	936829	803671	968191	939461	953826
C18801	2.10077e+07	3.72145e+07	644263	1.02081e+06	2.50272e+06	1.46036e+06	757414	609453	683612	3.93289e+06	2.66764e+07	1.53046e+07
C18818	635761	258889	192053	494966	426947	439606	125542	115240	122869	183501	480647	332074
C18831	527019	545053	1.822e+06	377389	389131	393419	383546	393409	373771	1.85202e+06	393342	1.12268e+06
C18846	7.80313e+08	388179	1.87314e+08	1.80148e+08	1.1856e+08	1.36761e+08	5.61802e+07	6.20241e+07	4.60552e+07	1.02613e+07	2.49486e+08	1.29874e+08
C18852	631749	444118	226036	316922	298045	557599	195730	206446	186198	3.4269e+06	797468	2.11218e+06
C18853	392184	150632	54312.2	47218.1	45758.6	256772	48623.8	47888.1	47956.4	45847.4	46258.6	46053
C18857	1.98823e+06	596786	403599	935622	774355	862956	419003	328221	380970	406568	1.00826e+06	707414
C18877	2.7856e+07	3.03494e+07	3.04885e+07	2.25327e+07	1.87657e+07	1.75049e+07	1.19506e+07	1.06727e+07	9.90332e+06	1.55875e+07	1.38503e+07	1.47189e+07
C18889	1.02136e+06	400621	507027	452486	374004	530696	137980	120959	127642	396303	543260	469782
C18898	2.04799e+06	1.77953e+06	1.80335e+06	1.26535e+06	1.25906e+06	701041	1.3978e+06	1.36322e+06	1.32307e+06	1.32123e+06	1.20571e+06	1.26347e+06
C18921	68595.6	62461.6	55698.2	50776.6	48490.3	50553.8	52095.9	51194.6	51685.4	50598.2	51426.2	51012.2
C18923	159409	81116.8	151015	67146.2	65872.6	78315.2	67480	65307.7	64776.7	118791	68624.6	93707.9
C18934	278573	185673	246071	256471	288372	351174	178884	150686	165494	182669	145374	164021
C18935	4.09041e+06	457835	2.22337e+06	1.52437e+06	1.43936e+06	1.62907e+06	755966	548363	767141	1.96612e+06	1.46937e+06	1.71775e+06
C19013	1.71231e+06	1.25108e+06	733237	1.01354e+06	1.04354e+06	1.18231e+06	955425	1.17735e+06	887004	848811	1.10569e+06	977249
C19015	269925	220732	168661	188409	173693	273783	119870	132779	133757	155674	160370	158022
C19026	436493	350191	308490	337558	306083	559414	239193	269142	239943	248410	250738	249574
C19031	9.32503e+07	9.5629e+07	8.30518e+07	9.94085e+07	9.90081e+07	9.5247e+07	9.24329e+07	9.73599e+07	9.73526e+07	7.4541e+07	7.82519e+07	7.63964e+07
C19032	403299	167548	267744	770576	322184	136920	1.64935e+06	186758	274227	92655.9	110359	101507
C19052	878593	617649	314355	487357	414501	775471	306359	287111	283992	382757	433686	408221
C19075	403888	326992	265414	364226	327399	856675	304906	217664	274133	220390	243957	232174
C19092	392588	111943	58884	106195	95911.6	101035	73216.6	95385.5	64645.4	56970.6	73829.4	65400
C19098	162168	346111	275421	291241	301049	311051	275465	258019	280860	319430	303435	311432
C19119	392701	296192	1.16576e+06	359377	193451	216724	185185	181789	175726	1.16179e+06	751722	956758
C19128	133759	419063	1.58873e+06	783053	850523	3.53448e+06	5.54079e+06	4.00263e+06	449930	483829	1.29768e+06	890757
C19131	8.97497e+07	1.31389e+08	1.469e+08	1.5921e+08	6.32941e+07	1.48564e+08	1.76079e+08	6.93949e+07	1.77353e+08	8.87026e+07	1.93407e+08	1.41055e+08
C19136	3.54141e+06	2.3486e+06	1.72878e+06	1.57971e+06	1.51975e+06	1.76201e+06	1.19916e+06	1.13165e+06	1.18844e+06	1.64072e+06	1.65229e+06	1.64651e+06
C19137	1.5841e+06	737005	732421	1.09042e+06	1.17941e+06	1.2057e+06	526375	484521	500714	625706	575060	600383
C19138	2.78196e+06	3.95765e+06	1.40612e+06	6.92405e+06	2.44369e+07	2.53465e+07	1.21521e+07	1.68548e+07	1.5084e+07	3.52115e+07	1.90464e+07	2.71289e+07
C19147	96542.7	273352	444996	448203	65051	132619	234276	235219	386692	258905	53882.9	156394
C19158	266750	1.93784e+06	850794	3.17142e+06	3.13379e+06	1.39472e+06	2.56685e+06	734120	741158	600752	2.52613e+06	1.56344e+06
C19173	1.90867e+06	774508	1.50403e+06	2.86746e+07	1.78476e+07	3.4482e+07	6.83043e+07	1.13953e+08	6.30162e+07	1.46667e+06	3.33049e+07	1.73858e+07
C19174	438257	184046	307189	226662	190465	246569	148596	139297	147370	242260	210841	226550
C19181	1.81314e+06	531026	1.42476e+06	1.90962e+06	3.27862e+06	1.20988e+07	1.70184e+06	9.82669e+06	7.27669e+06	931165	427445	679305
C19194	557991	495222	493819	447807	428224	468043	454181	475131	469978	435400	469180	452290
C19205	3.56296e+06	2.63859e+07	4.51543e+07	2.43629e+07	2.673e+07	2.49193e+07	7.25629e+07	7.98586e+07	7.69259e+07	2.64688e+07	2.11372e+07	2.3803e+07
C19218	197967	208380	368413	145057	141050	139990	151694	148407	135304	265929	147515	206722
C19243	7.10972e+06	3.66434e+06	4.3144e+06	3.66266e+06	3.19814e+06	3.84826e+06	2.28806e+06	2.00745e+06	2.14057e+06	3.33791e+06	3.79029e+06	3.5641e+06
C19247	193828	163478	686697	118427	126716	119313	117012	194965	121713	124417	132514	128466
C19266	2.16142e+09	3.99916e+07	2.79917e+07	3.7879e+07	2.86684e+07	4.28807e+07	1.3612e+07	8.16743e+06	1.26685e+07	2.33749e+07	3.17741e+07	2.75745e+07
C19272	2.37594e+06	6.39771e+06	5.88289e+06	8.65345e+06	7.27628e+06	1.87784e+06	9.66479e+06	2.38038e+06	3.17955e+06	1.64644e+06	5.03366e+06	3.34005e+06
C19282	2.37072e+06	1.22195e+06	389593	1.49372e+06	612217	2.74882e+06	275744	397259	490018	297289	237313	267301
C19283	627381	5.11629e+06	679952	5.20837e+06	4.14406e+06	660434	355987	334066	660101	256538	424866	340702
C19284	1.81832e+08	5.23073e+07	5.66723e+07	4.87135e+07	3.58543e+08	3.98163e+07	3.59322e+08	7.73117e+07	3.03415e+08	2.69827e+07	3.88642e+07	3.29234e+07
C19303	3.07315e+06	2.31951e+06	1.93739e+06	2.97742e+06	2.55446e+06	3.87037e+06	2.16284e+06	2.02419e+06	2.06346e+06	3.28708e+06	1.7305e+06	2.50879e+06
C19310	1.35397e+08	8.06426e+07	2.09841e+08	1.71833e+08	1.82755e+08	2.0295e+08	9.60546e+07	7.09917e+07	9.46617e+07	2.49182e+08	1.93415e+08	2.21299e+08
C19326	259495	400514	245630	302675	489714	250594	604475	406304	393457	269687	199347	234517
C19333	8.795e+06	2.71258e+06	1.26054e+06	5.25749e+06	6.16286e+06	7.31129e+06	7.91198e+06	2.48318e+06	6.84401e+06	583995	4.73822e+06	2.66111e+06
C19350	660933	413798	248164	402780	396461	532243	238690	221700	238337	292175	293826	293000
C19380	3.23824e+06	228243	201765	156720	145100	201172	136573	134095	129923	153029	156058	154543
C19391	258636	222555	236735	5.5979e+06	3.38452e+06	5.17797e+06	135774	129302	139042	447692	176565	312128
C19392	612828	283253	253271	213091	196134	205445	160632	149740	159509	200630	215712	208171
C19400	555327	365808	190007	226536	236682	1.01586e+06	149975	141837	144695	186858	286427	236643
C19409	749222	534504	421808	360850	340404	814611	258393	328743	309614	2.91706e+06	546685	1.73187e+06
C19429	334307	3.21889e+06	1.17014e+06	2.20617e+06	2.33604e+06	3.94946e+06	2.20991e+06	2.52888e+06	5.24997e+06	2.12465e+06	2.36049e+06	2.24257e+06
C19434	8.66428e+06	871142	646947	8.89332e+06	7.68471e+06	3.33625e+07	1.65828e+06	1.46327e+06	1.07822e+06	9.00771e+06	1.6119e+06	5.3098e+06
C19444	2.0296e+06	4.4997e+06	427093	3.45651e+06	2.10259e+07	2.35173e+07	7.11215e+06	7.10816e+06	5.91331e+06	1.278e+06	2.86961e+06	2.0738e+06
C19461	504880	324378	269385	385807	341996	342574	236212	189359	214564	250920	375364	313142
C19482	286804	351298	243171	370923	310384	715632	270197	368645	260020	227814	269828	248821
C19485	8.48405e+06	3.56075e+06	4.51273e+06	4.40922e+06	3.47959e+06	5.1894e+06	1.29756e+06	995391	1.26638e+06	3.32584e+06	6.8324e+06	5.07912e+06
C19488	2.63567e+06	716576	4.41464e+06	393546	365517	428106	3.97337e+06	2.67369e+06	3.28168e+06	3.9504e+06	426355	2.18838e+06
C19506	7.35559e+07	3.13757e+07	2.62741e+08	4.20745e+07	7.61109e+07	9.02711e+07	1.34846e+07	1.34419e+07	1.39477e+07	2.25853e+08	9.21097e+07	1.58981e+08
C19508	83066.3	125743	59722.6	112199	110418	108232	82655.1	7.0859e+06	439590	57369.4	168989	113179
C19518	2.09083e+06	1.82755e+06	1.7979e+06	1.36173e+06	1.31369e+06	1.37856e+06	1.43454e+06	1.48951e+06	1.36184e+06	1.26357e+06	1.32263e+06	1.2931e+06
C19524	773020	578660	486287	748940	605126	897137	412588	386349	389483	400173	415287	407730
C19526	2.60657e+07	1.96599e+07	3.86354e+07	1.25297e+08	8.86756e+07	8.94531e+07	1.4554e+08	1.4686e+08	2.07693e+08	4.45926e+07	1.4715e+07	2.96538e+07
C19530	553607	537935	452992	350872	336881	354337	873253	565020	583079	364908	405933	385420
C19535	1.61362e+06	1.32359e+06	808034	1.92211e+06	1.87113e+06	1.15815e+06	1.3912e+06	2.81045e+06	3.24677e+06	285021	1.61133e+06	948178
C19545	1.09987e+06	1.00227e+06	984866	1.1348e+06	1.46715e+06	1.66392e+06	846986	708187	824144	701693	827259	764476
C19548	610433	2.81984e+06	3.36644e+06	830676	2.40396e+06	583629	511179	670693	383429	968061	423504	695783
C19556	948822	795138	3.45093e+06	516927	3.68304e+06	3.63111e+06	2.4833e+06	1.86611e+06	2.62194e+06	3.5928e+06	630784	2.11179e+06
C19615	3.85386e+06	1.61204e+06	3.38111e+06	6.20676e+06	4.91411e+06	5.76917e+06	1.71553e+06	855999	1.55637e+06	3.39049e+06	7.40579e+06	5.39814e+06
C19659	363326	315311	381398	653156	1.06493e+06	648871	826571	1.15232e+06	704655	306196	1.28904e+06	797616
C19691	6.19897e+06	2.60902e+06	1.60803e+06	3.63835e+06	387973	1.186e+06	2.8557e+06	879674	6.57567e+06	884273	2.06746e+06	1.47587e+06
C19705	1.18451e+06	381127	7.6336e+06	725803	602070	778403	320023	296676	318181	6.48494e+06	917194	3.70107e+06
C19783	138295	367493	133437	245813	185998	169786	205072	288296	244682	412432	130584	271508
C19786	1.68541e+06	1.01409e+06	741675	729010	630194	791137	549045	522020	545085	589128	747753	668441
C19798	220067	207148	873395	1.57453e+06	1.18726e+06	1.76985e+06	326068	267131	171961	851614	2.06735e+06	1.45948e+06
C19891	807258	800537	649177	539874	529247	805940	453796	449811	458452	500785	512582	506683
C19892	5.2155e+08	1.37554e+07	3.58016e+06	2.7817e+08	2.0522e+08	2.05316e+08	1.4486e+08	1.08592e+08	1.38839e+08	3.15289e+06	2.66323e+08	1.34738e+08
C19907	1.85029e+08	1.89613e+08	1.44315e+08	5.59997e+07	3.3794e+08	3.54561e+07	2.10318e+08	1.40874e+08	2.57967e+08	9.50446e+07	4.04908e+07	6.77677e+07
C19910	334039	287438	305752	455198	492350	363173	175357	166998	179578	261203	240061	250632
C19915	99873.7	100545	90995.9	64484.2	71847.4	66986.6	62579.5	68363.7	58484.6	73123.2	72658.8	72891
C19916	89981.9	92435.2	146707	154745	183027	222062	112991	137144	136291	211440	399180	305310
C19917	127151	125186	147814	112239	107124	119499	119622	120602	118892	131675	113280	122477
C19949	261066	250702	240425	171196	179694	181567	165706	170190	169528	183918	182220	183069
C19953	1.08133e+06	1.19248e+06	551605	624073	879062	651289	2.61753e+06	706761	1.8741e+06	424701	1.10993e+06	767318
C19954	4.54559e+06	2.43896e+06	1.68315e+07	2.8084e+06	2.67723e+06	1.7526e+08	1.81687e+06	1.9151e+06	1.84424e+06	2.0311e+07	2.79562e+06	1.15533e+07
C19990	70497.4	64045	68023.5	58232.6	57881	100954	62563.3	61502.6	60094.2	58416.3	58308.1	58362.2
C19998	830783	536723	413670	698775	568522	2.68206e+07	1.78286e+06	1.64992e+06	295845	535636	1.87976e+06	1.2077e+06
C20021	196921	60259.6	115478	105832	101078	104461	54199.2	54405.4	56099.1	111673	154847	133260
C20045	838859	449287	2.50262e+06	204190	229176	268419	177304	410410	243024	2.06491e+06	267321	1.16612e+06
C20125	643257	358159	85272.4	283637	239404	275102	131342	651721	395411	47171.7	268928	158050
C20144	1.27656e+06	663152	3.40225e+06	788696	751859	851669	505371	537826	517926	3.64819e+06	772496	2.21034e+06
C20231	9.56495e+06	4.92896e+06	3.19061e+06	4.26978e+06	3.38062e+06	4.9674e+06	1.83451e+06	1.32255e+06	1.83595e+06	2.92233e+06	3.67039e+06	3.29636e+06
C20239	765289	666709	2.33609e+06	442543	451897	502709	467143	503916	466029	5.14815e+06	507437	2.82779e+06
C20268	1.018e+07	439339	248092	297140	282812	2.8632e+06	212073	195460	196901	250534	686871	468703
C20286	407824	406289	275960	2.54759e+06	2.04312e+06	2.39938e+06	372850	373395	342487	284046	314151	299098
C20314	179441	182533	161868	125921	116874	124273	148130	134910	126145	124256	124300	124278
C20316	2.31008e+07	3.8575e+07	3.12796e+07	6.22726e+07	5.06603e+07	4.89669e+07	6.08801e+07	5.89069e+07	6.11564e+07	4.35426e+07	6.51298e+07	5.43362e+07
C20340	5.20014e+06	557635	625540	763595	594116	518558	453704	417368	413972	399403	395827	397615
C20351	2.21406e+06	153917	486804	1.90236e+06	1.55832e+06	2.25279e+06	139558	137795	134803	249618	1.38074e+06	815181
C20380	1.37154e+06	993893	511285	811687	640485	715512	294782	228532	289960	527526	778827	653176
C20396	53840.7	203961	59154.7	67415.2	50023.8	59082.8	75098.6	52352.5	103587	51299.8	74046.4	62673.1
C20417	212340	215654	194506	145269	150924	164206	151003	129823	142441	155247	154238	154743
C20424	808210	785331	661322	561706	448380	543018	442851	440371	444697	583138	575222	579180
C20441	4.84099e+06	5.89598e+06	4.249e+06	1.61344e+06	8.32888e+06	3.34226e+06	1.39245e+06	951647	1.44378e+06	4.36318e+06	5.05205e+06	4.70762e+06
C20452	4.26605e+06	1.61866e+06	1.51096e+06	3.15872e+06	2.35375e+06	3.26012e+06	705720	544763	670501	1.32542e+06	3.92923e+06	2.62733e+06
C20515	413043	621349	434888	318788	303628	386359	431167	289970	675894	318620	290764	304692
C20517	3.76847e+08	4.7633e+08	3.81124e+08	2.296e+08	4.31196e+08	3.47696e+08	1.46535e+08	1.25644e+08	1.45837e+08	3.07636e+08	2.0465e+08	2.56143e+08
C20543	1.983e+06	1.60494e+06	7.43867e+06	1.04343e+07	8.67427e+06	9.93445e+06	3.23295e+07	3.16797e+07	3.18603e+07	7.25185e+06	1.15594e+07	9.40564e+06
C20545	380070	176405	209695	207139	174290	212077	129400	111279	119775	169285	209013	189149
C20546	9.96159e+06	1.88165e+07	1.56857e+07	6.95341e+06	5.62837e+06	6.5203e+06	5.61706e+06	5.98151e+06	6.09108e+06	1.89285e+07	2.58014e+06	1.07543e+07
C20552	208969	215046	264304	187315	182282	2.48088e+07	188052	187897	198469	389444	192105	290775
C20554	403831	236478	714940	214898	183072	217200	175650	157811	164875	1.11933e+06	196991	658160
C20651	2.57687e+08	3.99091e+08	9.29135e+07	4.03475e+08	3.63902e+08	3.30979e+08	4.22486e+08	4.59388e+08	4.5455e+08	1.06717e+08	3.79742e+08	2.4323e+08
C20669	1.04909e+06	737509	366983	526286	494939	925958	325033	342827	309203	457034	526668	491851
C20692	2.01139e+06	1.59791e+06	863404	2.12986e+06	2.10535e+06	2.08501e+06	2.00029e+06	2.04104e+06	1.9219e+06	788829	2.08899e+06	1.43891e+06
C20701	1.17205e+06	2.28987e+06	1.21957e+06	2.48031e+06	689733	2.01678e+06	882948	305651	582704	2.09729e+06	4.35214e+06	3.22472e+06
C21201	758007	1.88244e+06	2.59992e+06	556409	223961	713007	775832	1.44826e+06	604425	220415	213220	216817
C21217	2.38408e+06	6.67123e+06	1.18125e+06	3.17226e+06	1.84238e+06	3.74402e+06	2.16184e+06	1.74257e+06	1.98782e+06	761948	3.83792e+06	2.29994e+06
C21247	425621	1.71575e+06	352731	1.41962e+06	1.3063e+06	1.0145e+06	437549	350604	608185	311163	5.29126e+06	2.80121e+06
C21283	5.76214e+06	2.54524e+07	1.01862e+06	905841	2.22713e+06	3.35722e+07	800936	2.4429e+06	272236	6.11057e+06	8.77066e+06	7.44061e+06
C21289	1.17546e+06	527281	604609	4.30938e+06	3.38299e+06	844319	383904	349896	377124	479155	440372	459764
C21304	641990	565767	2.77081e+06	2.03528e+06	1.98085e+06	2.18938e+06	1.48257e+06	1.22297e+06	1.57699e+06	2.84618e+06	2.72348e+06	2.78483e+06
C21542	2.32941e+06	1.98606e+06	4.70319e+06	6.6016e+06	5.48808e+06	6.28537e+06	3.17126e+06	1.63999e+06	3.34831e+06	4.58813e+06	1.06373e+06	2.82593e+06
C21551	442137	389640	539817	348883	340002	357312	298278	290268	281697	446635	328980	387807
C21557	88802	96793.7	91749.6	82627.7	81011.3	915829	85204.8	84504.1	84869	82316.8	85247.3	83782
C21793	9.90123e+08	8.46517e+08	6.21793e+08	8.00272e+08	7.52171e+08	7.7126e+08	5.9868e+08	5.18966e+08	5.73815e+08	5.81711e+08	8.14148e+08	6.97929e+08
C22163	337138	315240	296057	226537	227946	229954	214170	225631	228690	230881	233038	231960
C22165	479554	394286	1.65023e+06	239184	261164	277131	246339	268643	245242	1.60924e+06	385182	997209
C22170	81329.7	53083.9	25334.8	12102.2	11593.7	11519.2	11766.7	11271.6	10989.2	21679.4	409639	215659
C22189	244646	175685	212098	147327	148498	614164	151503	135742	140376	181658	177747	179702
D02982	1.89304e+06	1.23915e+06	751650	903730	797668	1.68463e+06	598151	561094	564815	753451	1.13308e+06	943264
HMDB0000349	220410	117463	98948.2	126895	121775	163309	65787.3	43688.1	64919	90969.5	137129	114049
HMDB0000439	3.65218e+06	2.00756e+06	1.16105e+07	6.10747e+06	1.45687e+07	1.37198e+07	1.85393e+07	1.405e+07	1.47152e+07	1.02068e+07	1.10793e+07	1.0643e+07
HMDB0000706	4.08752e+06	1.62247e+06	2.66064e+06	1.89082e+06	7.58275e+06	2.78833e+06	1.26882e+07	1.36197e+07	1.3604e+07	2.07788e+06	2.2078e+06	2.14284e+06
HMDB0001417	381726	252899	130201	287474	320273	259650	138551	123858	121414	107007	135054	121030
HMDB0001538	8.57927e+06	5.65703e+06	5.80006e+06	1.17599e+06	1.88954e+06	4.4911e+06	1.99325e+06	1.92867e+06	2.00622e+06	7.75771e+06	3.50853e+06	5.63312e+06
HMDB0002091	275202	257061	257748	214387	223580	210316	232904	243415	241481	233808	222911	228359
HMDB0010347	549256	348393	289329	414370	367315	382765	253700	203379	230449	269497	403154	336326
HMDB0013078	6.75937e+06	5.20793e+06	5.64921e+06	5.11978e+06	4.68668e+06	5.28615e+06	3.98883e+06	4.21257e+06	4.02592e+06	4.87417e+06	5.06705e+06	4.97061e+06
HMDB0013158	2.20304e+08	1.3754e+06	6.52986e+06	5.30052e+07	2.76844e+07	3.44066e+07	8.66538e+06	3.13733e+06	7.96578e+06	1.38911e+07	5.55603e+07	3.47257e+07
HMDB0013659	5.20642e+07	6.00646e+07	5.51139e+08	2.80006e+07	2.99604e+07	2.75406e+07	2.94844e+07	2.98897e+07	2.85345e+07	1.00253e+09	3.78909e+07	5.20208e+08
HMDB0028699	315455	160405	274144	211940	176837	202370	130788	116993	189534	324864	172984	248924
HMDB0031511	192613	237377	177229	1.14084e+06	1.53166e+06	1.13617e+06	1.29763e+06	563336	447355	142419	612891	377655
HMDB0032024	3.79518e+07	3.30696e+07	7.88958e+07	5.27653e+07	1.16714e+07	2.18025e+07	1.929e+07	2.34735e+07	1.7688e+07	8.52371e+07	2.4989e+07	5.51131e+07
HMDB0033115	357640	292293	265423	222401	191088	518627	184990	186451	195638	206798	209128	207963
HMDB0034315	352031	302920	322220	479716	518868	382734	184803	175993	189251	275272	252991	264131
HMDB0040991	6.24555e+06	839009	5.28159e+06	5.3963e+06	3.20002e+06	4.6067e+06	797369	535231	1.01763e+06	782428	4.26252e+06	2.52247e+06
HMDB0250338	161149	141183	96038.9	175026	165541	3.50666e+06	140926	133616	135161	108469	124135	116302
HMDB0253028	6.96502e+06	756477	1.09496e+06	2.62713e+06	6.8934e+06	8.55909e+06	555496	351644	357383	507536	531166	519351
HMDB0253945	653947	319040	626177	321950	284237	367845	236846	226374	222240	583922	334324	459123
HMDB0254339	449444	233987	176895	99388.1	107193	920155	110517	157361	332314	212086	461754	336920
HMDB0254500	424460	417894	361517	376823	383075	396687	383147	481689	374278	341209	366340	353775
HMDB0254869	1.46385e+06	1.31182e+06	1.12436e+06	1.13049e+06	933958	2.1039e+06	1.17049e+06	1.10808e+06	780115	1.04954e+06	1.0835e+06	1.06652e+06
HMDB0303857	465714	423610	406551	371410	317742	459055	296184	287196	297720	388055	1.81127e+06	1.09966e+06
HMDB0304500	868598	330224	238449	435309	240952	393148	201433	195971	350930	187568	237684	212626

## Sheet: nomalize data-graph was made 
Sample	SP1	SP2	SP3	SPI1	SPI2	SPI3	SPID1	SPID2	SPID3	SPUD1	SPUD2	SPUD3
Label	UNINFECTED	UNINFECTED	UNINFECTED	INFECTED	INFECTED	INFECTED	INFECTED+D	INFECTED+D	INFECTED+D	UNINFECTED+D	UNINFECTED+D	UNINFECTED+D
C00135	1	1	1	3.8691	2.19108	41.4987	0.425239	0.184291	0.105674	0.909154	0.183951	0.546552
C00328	1	1	1	0.901005	0.836955	1.52754	0.637988	0.740448	0.637605	0.607424	0.603668	0.605546
C00490	1	1	1	0.12116	0.139872	0.0136512	0.145269	0.143676	0.123042	0.0440781	0.0447683	0.0444232
C00878	1	1	1	0.801034	0.773611	1.16013	0.648442	0.570015	0.591657	0.671462	0.719223	0.695343
C01489	1	1	1	1.38505	1.35441	2.00962	2.64906	0.670284	0.682842	1.15123	1.13568	1.14345
C01591	1	1	1	0.0240952	2.06088	2.00624	2.21898	1.92281	2.09179	7.22266	0.0103027	3.61648
C01595	1	1	1	0.681516	0.550216	6.62256	0.223639	0.177949	0.157527	0.61686	0.867389	0.742125
C01904	1	1	1	1.17507	2.27133	1.04409	1.30653	1.27242	1.7851	0.776207	0.819416	0.797811
C02837	1	1	1	1.14526	0.896944	1.20717	0.751622	0.93859	0.911799	0.83708	0.986468	0.911774
C06940	1	1	1	0.0893668	0.104243	0.125639	0.0815834	0.0803302	0.0782688	0.925717	0.0951631	0.51044
C06953	1	1	1	0.834255	0.826867	0.906183	0.86011	0.931267	0.868199	0.819971	0.870293	0.845132
C07063	1	1	1	10.8907	1.79644	2.23102	2.3815	2.89501	4.116	0.138721	11.3718	5.75527
C08475	1	1	1	0.521096	0.490885	0.691191	0.445039	0.425363	0.408095	1.09721	0.628203	0.862704
C08691	1	1	1	0.701296	0.611508	0.813381	0.490621	0.459185	0.363541	0.704104	0.866995	0.785549
C09098	1	1	1	1.16332	1.11138	1.01612	1.10243	1.07524	1.05792	1.01887	1.04863	1.03375
C09100	1	1	1	0.82185	0.867457	2.89525	0.878295	0.944413	0.946045	0.86446	0.861401	0.86293
C09419	1	1	1	0.24297	0.243061	0.262397	0.33717	0.252721	0.224448	0.275922	0.23713	0.256526
C09633	1	1	1	0.200919	0.190649	0.25843	0.152144	0.152533	0.141407	0.962274	0.196734	0.579504
C09674	1	1	1	0.319445	0.338421	0.333303	0.326438	0.44487	1.27824	0.447972	0.319531	0.383752
C09697	1	1	1	0.910243	0.883551	0.946456	0.65857	0.607012	0.566485	0.735562	1.05162	0.893589
C10149	1	1	1	0.63236	0.554067	2.43625	0.271503	0.661901	0.132624	0.700618	0.651295	0.675956
C10341	1	1	1	0.548467	0.516354	0.660482	0.533755	0.533377	0.493209	0.972062	0.686956	0.829509
C10460	1	1	1	0.492743	0.401521	4.50858	1.52759	0.7306	1.19957	0.474583	0.461498	0.468041
C10462	1	1	1	0.996693	0.895261	1.27279	0.523317	0.481444	0.465973	0.760945	0.910863	0.835904
C10550	1	1	1	0.14574	0.110871	0.119848	0.109167	0.0962875	0.0928899	2.91558	0.0810451	1.49831
C10576	1	1	1	0.886255	0.677662	0.562798	0.446738	1.15015	1.34244	0.767715	1.73161	1.24966
C10636	1	1	1	0.872114	3.37062	3.95231	1.0305	1.05071	1.02652	4.33489	4.05861	4.19675
C10851	1	1	1	0.463401	0.257835	0.0530269	0.131797	0.216781	0.114474	0.0134458	0.122128	0.0677869
C10927	1	1	1	0.301662	0.298542	0.314102	0.264546	0.288678	0.261264	1.7302	0.305693	1.01794
C11721	1	1	1	0.251955	0.204625	196.59	0.119783	0.112908	0.11314	2.13845	0.272856	1.20565
C12032	1	1	1	2.04999	1.28857	1.41554	0.415407	0.260079	0.326306	1.22276	1.94106	1.58191
C12391	1	1	1	0.843444	0.840318	0.815702	0.926562	0.910853	0.895813	0.865145	0.863543	0.864344
C14291	1	1	1	5.76449	4.59331	0.794741	0.662485	0.550516	0.364714	2.03003	0.525332	1.27768
C14322	1	1	1	1.41717	1.28485	0.995635	1.74444	1.7278	1.74866	0.477856	0.765435	0.621645
C14743	1	1	1	4.13874	0.767029	3.64712	0.612451	0.340458	1.92976	0.54959	1.27251	0.911048
C14859	1	1	1	0.813716	0.948914	0.973017	1.11412	0.681874	1.16945	0.728069	1.03201	0.88004
C15678	1	1	1	0.26561	0.199748	0.226983	0.118243	0.119028	0.115079	2.18763	0.283875	1.23575
C15819	1	1	1	0.711403	0.621734	1.19338	0.441252	0.4227	0.420364	0.593105	0.891941	0.742523
C16624	1	1	1	6.22141	3.63558	30.2986	0.88141	1.00247	0.960213	0.792869	0.866332	0.8296
C16625	1	1	1	1.01009	1.0805	1.09526	0.88929	1.23541	1.00512	0.812397	0.850412	0.831404
C16891	1	1	1	0.279837	0.412652	0.415391	2.36299	0.701282	0.63053	0.123594	0.255938	0.189766
C17005	1	1	1	0.67566	0.58625	0.715029	0.243432	0.191915	0.208853	0.122688	0.10118	0.111934
C17156	1	1	1	1.0598	1.09693	1.104	0.640404	0.546682	0.505116	0.868839	1.05768	0.963259
C17968	1	1	1	0.0746527	0.130604	0.219966	0.0632432	0.035201	0.0510964	0.545528	0.13203	0.338779
C17992	1	1	1	0.398148	2.20745	2.72834	0.886081	0.489167	0.524645	2.05584	1.99542	2.02563
C18466	1	1	1	0.747443	0.732731	1.06396	0.62827	0.562462	0.59464	0.659632	0.683698	0.671665
C18470	1	1	1	0.43757	0.528058	0.38582	0.0833321	0.0707777	0.0664237	0.134545	0.479786	0.307166
C18504	1	1	1	0.561966	1.94246	1.89768	2.70037	2.33314	2.60384	0.306711	0.545439	0.426075
C19114	1	1	1	0.507029	0.517086	0.480255	0.523877	0.485154	0.487677	1.24449	0.455083	0.849786
C19994	1	1	1	0.422728	0.354099	0.425394	0.322437	0.180206	0.161689	0.869081	0.337761	0.603421
D04563	1	1	1	0.639832	0.62829	0.656069	0.654117	0.642838	0.616461	0.882316	0.6594	0.770858
C00003	1	1	1	0.809177	0.846693	0.764454	0.698153	0.601087	0.601889	0.856992	0.837244	0.847118
C00004	1	1	1	0.94204	1.41995	1.4499	1.30672	1.19196	1.15815	1.37735	1.32832	1.35283
C00005	1	1	1	0.617605	0.531956	0.662005	0.463669	0.441642	0.450238	0.539816	0.634994	0.587405
C00008	1	1	1	0.779288	1.13619	0.767427	0.13903	0.435566	0.528613	1.80714	0.425173	1.11616
C00009	1	1	1	0.299445	0.218725	0.132758	1.83316	2.19131	1.742	1.46569	2.24495	1.85532
C00019	1	1	1	0.618292	0.624982	0.659328	0.592062	0.596674	0.613247	0.841916	0.645766	0.743841
C00021	1	1	1	0.901005	0.878584	1.46092	0.750297	0.761624	0.751044	0.665361	0.603668	0.634515
C00022	1	1	1	0.121966	0.137735	0.103606	0.120105	0.101331	0.104837	0.179455	0.202781	0.191118
C00025	1	1	1	1.18581	1.04285	10.5688	1.11578	1.1745	1.25485	0.989018	0.998416	0.993717
C00026	1	1	1	0.941312	1.25389	1.06967	1.02416	1.46675	0.687911	0.713287	0.730352	0.72182
C00031	1	1	1	1.01474	0.871836	0.509903	0.511265	0.715799	0.739534	0.447037	0.285166	0.366102
C00036	1	1	1	0.731653	0.556062	0.335463	0.0275845	0.076046	0.0722196	0.644981	1.1546	0.899793
C00037	1	1	1	0.0953473	0.114159	0.219323	0.133098	0.128072	0.140293	0.162143	0.2575	0.209822
C00042	1	1	1	0.479063	0.889723	1.37758	1.93044	0.195309	0.780606	0.291413	0.0843098	0.187861
C00049	1	1	1	0.980475	0.904022	1.0525	1.02006	1.42225	1.48435	0.600318	1.02053	0.810422
C00059	1	1	1	1.28538	1.11591	1.48499	0.704986	0.567266	0.497503	0.580605	0.661765	0.621185
C00061	1	1	1	1.17086	1.01001	1.26828	0.998113	1.13228	0.98546	0.791718	0.810359	0.801039
C00062	1	1	1	2.65703	1.80816	12.5111	0.522367	0.0138526	0.00851255	0.178481	0.320004	0.249243
C00064	1	1	1	1.10434	1.18269	7.29922	0.0972333	0.0296859	0.0127766	0.0601009	0.245612	0.152857
C00065	1	1	1	0.233353	0.288907	1.63554	0.0845591	0.0981391	0.0845083	0.0805082	0.2817	0.181104
C00074	1	1	1	0.75735	0.521135	0.595734	1.18928	0.568975	0.574318	1.06767	2.73228	1.89997
C00075	1	1	1	0.918606	0.888871	0.943169	0.793922	0.958928	1.11994	0.889775	0.823201	0.856488
C00078	1	1	1	1.04283	0.993548	1.55482	0.974187	1.16979	1.06962	0.665283	1.00297	0.834126
C00079	1	1	1	8.39778	4.96208	39.8319	0.325568	0.116877	0.0463044	0.0440298	0.717805	0.380917
C00080	1	1	1	0.952	1.00303	1.01789	0.800116	0.707171	0.736644	0.959487	0.98027	0.969878
C00082	1	1	1	0.52426	0.493866	0.649176	0.437918	0.427946	0.409696	1.10387	0.632018	0.867942
C00086	1	1	1	0.755996	0.667126	0.72562	0.695921	0.664304	0.680365	0.708849	0.716509	0.712679
C00093	1	1	1	0.313592	0.310347	0.341826	0.320302	0.310166	0.290274	1.83898	0.317781	1.07838
C00099	1	1	1	0.660469	0.651052	0.390001	0.512736	0.50192	0.46319	0.719475	0.798764	0.759119
C00106	1	1	1	1.05606	1.09	2.36349	0.261279	0.0990547	0.189248	1.0781	1.05064	1.06437
C00108	1	1	1	0.717967	0.68726	0.636751	0.750012	0.670003	0.725857	0.72778	0.707203	0.717491
C00110	1	1	1	1.25452	0.997005	19.4267	0.320786	0.316786	0.267758	0.469574	1.3934	0.931488
C00111	1	1	1	0.866027	0.725192	0.888246	0.64804	0.555405	0.528213	1.02094	0.832684	0.926813
C00114	1	1	1	4.39044	6.34504	67.9024	2.91103	2.80342	0.92412	0.458472	0.566586	0.512529
C00118	1	1	1	0.46024	0.107022	0.228681	0.975741	0.0863359	0.0601637	0.11095	0.240147	0.175549
C00122	1	1	1	0.348218	0.431925	0.446291	0.0976453	0.0852607	0.466907	0.596767	0.397364	0.497065
C00123	1	1	1	0.531601	0.462107	0.672775	0.16049	0.163431	0.285731	0.674628	0.586453	0.630541
C00125	1	1	1	1.38146	1.62803	1.62735	1.60186	0.78003	0.724324	0.683601	1.28505	0.984325
C00144	1	1	1	0.366835	0.370598	1.92981	0.367866	0.39069	0.380705	0.224914	0.38323	0.304072
C00147	1	1	1	0.81647	1.50519	2.4829	0.57855	0.650987	0.596305	0.600842	0.606472	0.603657
C00148	1	1	1	0.579924	0.564752	1.94885	0.294028	0.269529	0.244621	0.502194	0.515228	0.508711
C00149	1	1	1	1.26087	1.13878	1.20166	0.869313	1.15136	0.974093	0.681462	0.876589	0.779025
C00153	1	1	1	0.0485931	0.0212157	0.0260247	0.0161405	0.0182923	0.0443776	0.230077	0.246422	0.23825
C00158	1	1	1	0.681054	1.02412	1.03249	0.116085	0.0305443	0.0280649	0.736013	0.797046	0.76653
C00166	1	1	1	0.635604	0.708673	1.37227	0.887799	0.523808	0.613588	1.2945	1.68141	1.48795
C00170	1	1	1	0.256376	0.164274	0.165751	0.0436334	0.0413134	0.0403457	0.0496607	1.23306	0.64136
C00183	1	1	1	0.852021	0.960477	0.958296	1.0057	1.00282	1.03209	0.963668	0.864505	0.914086
C00188	1	1	1	0.762415	0.679739	0.766784	0.841619	0.931627	0.475937	1.37497	0.783878	1.07942
C00197	1	1	1	0.572152	0.486002	0.734604	0.134014	0.0901724	0.087179	0.560879	0.657832	0.609356
C00207	1	1	1	0.632271	0.66728	0.713737	0.678109	0.779794	0.857556	3.73555	0.766432	2.25099
C00214	1	1	1	0.914133	0.81503	0.844193	0.783638	0.766561	0.762898	1.04314	0.868072	0.955607
C00219	1	1	1	0.694197	0.569437	9.09349	0.2278	0.18126	0.167063	0.67849	0.928259	0.803374
C00227	1	1	1	1.08832	0.978279	1.5496	0.911071	0.839855	0.770797	0.658534	0.728952	0.693743
C00236	1	1	1	15.3411	10.9737	31.6354	2.59671	1.65737	0.852649	0.797835	0.580297	0.689066
C00249	1	1	1	3.61765	2.85956	18.7488	0.174511	0.266519	0.643923	0.712134	1.86291	1.28752
C00251	1	1	1	0.660704	0.642949	2.83006	0.528075	0.520613	0.528932	0.88723	0.945719	0.916474
C00253	1	1	1	0.0285749	0.136484	0.0781134	0.0336079	0.0218682	0.00917773	2.71381	0.105717	1.40976
C00256	1	1	1	0.610399	5.05725	0.747897	1.84539	1.61146	4.03524	0.602024	0.526111	0.564068
C00257	1	1	1	0.598391	0.675444	77.4168	0.528626	0.598659	0.562949	3.4517	0.524119	1.98791
C00261	1	1	1	1.19058	1.14374	1.31065	1.00954	0.999764	0.992723	1.13273	1.21356	1.17314
C00280	1	1	1	0.607111	0.721619	0.957921	0.548753	0.644593	0.849713	0.34485	0.356308	0.350579
C00284	1	1	1	28.2352	24.1815	26.0372	0.821096	0.856745	0.836676	0.689055	0.704033	0.696544
C00294	1	1	1	1.30203	1.52601	1.4239	0.745668	0.715793	0.693646	1.94817	0.701914	1.32504
C00295	1	1	1	0.245635	2.73754	0.955804	2.95441	0.522499	0.457966	0.203926	0.268473	0.2362
C00296	1	1	1	4.68202	0.708915	0.339343	8.4878	2.87802	7.01948	2.40345	0.326789	1.36512
C00299	1	1	1	0.215498	0.215023	0.0808068	0.0102119	0.0190403	0.00815313	0.190795	0.235967	0.213381
C00311	1	1	1	1.13315	1.13077	0.594793	0.0284514	0.071396	0.066176	0.618898	1.16519	0.892042
C00318	1	1	1	5.43234	5.51035	3.29739	0.179405	0.01933	0.0646128	0.279523	0.397672	0.338598
C00331	1	1	1	3.94772	6.29176	0.928352	0.559338	0.587326	0.45128	0.564191	0.564987	0.564589
C00337	1	1	1	1.05495	1.02029	1.05267	0.982014	1.15041	1.01629	0.600405	1.02303	0.811717
C00341	1	1	1	0.85729	0.79033	1.45147	0.674587	0.668183	0.689307	0.708343	0.729708	0.719025
C00354	1	1	1	0.0263068	0.275758	0.0320631	0.0745853	0.0119548	0.0102631	0.0498633	0.397998	0.223931
C00355	1	1	1	1.61178	0.707345	1.14946	1.48753	1.2394	5.95426	1.29945	0.691934	0.995692
C00363	1	1	1	0.372193	2.25381	0.414856	1.82901	0.542607	1.00551	0.168223	1.78155	0.974886
C00366	1	1	1	3.29342	0.102628	107.364	0.0885526	0.101617	0.394384	0.278508	0.659619	0.469063
C00380	1	1	1	4.61434	5.05339	2.63584	2.65774	0.241992	0.162113	0.196201	1.05662	0.62641
C00384	1	1	1	0.739755	0.695692	1.30154	0.45687	0.481882	0.366155	0.642413	0.725844	0.684129
C00385	1	1	1	11.3734	6.26427	40.6456	1.03839	1.03991	1.00526	0.791071	0.84306	0.817066
C00388	1	1	1	0.229157	0.892078	0.969104	0.509553	0.27942	0.333715	0.0668766	0.644118	0.355497
C00390	1	1	1	0.823464	0.586392	0.700071	0.287391	0.187007	0.111882	0.137009	1.21715	0.677079
C00396	1	1	1	1.25977	1.31821	1.33034	1.34135	1.35929	1.34884	2.10174	1.37119	1.73646
C00397	1	1	1	1.73694	1.40267	1.70308	1.12062	0.962711	0.501398	0.346778	3.29162	1.8192
C00399	1	1	1	1.17412	0.841239	0.977999	0.359582	0.208582	0.143505	0.0556817	1.81876	0.937223
C00407	1	1	1	1.35261	1.20164	7.90309	0.218959	0.150672	0.0704961	0.125451	0.333209	0.22933
C00408	1	1	1	1.01347	1.20061	10.1379	1.07997	1.04931	0.976236	0.815051	0.840347	0.827699
C00413	1	1	1	0.542954	0.552172	2.60242	0.575836	0.577361	0.594997	0.571574	0.575586	0.57358
C00415	1	1	1	0.279351	0.27343	0.28752	0.249156	0.251525	0.260507	0.344577	0.276432	0.310505
C00431	1	1	1	1.78938	0.0997811	0.973289	0.644687	0.192361	0.465602	1.03587	0.901176	0.968525
C00440	1	1	1	1.08882	1.17768	0.90924	0.429089	0.399454	0.398653	0.618094	0.574218	0.596156
C00445	1	1	1	1.08072	0.99555	1.11054	0.9582	1.15352	1.05988	0.661834	0.99822	0.830027
C00448	1	1	1	0.176734	0.164147	0.186515	0.118781	0.159336	0.145563	1.52171	0.191468	0.856588
C00449	1	1	1	2.43553	1.89859	2.53871	0.142376	0.137395	0.13618	0.2508	1.51596	0.883381
C00459	1	1	1	0.826493	0.872358	0.804926	0.861028	0.87637	0.910928	0.869344	0.863004	0.866174
C00463	1	1	1	1.07688	0.977288	1.03175	0.719812	0.616288	0.602567	0.649797	1.12239	0.886093
C00472	1	1	1	1.23775	1.20167	1.02212	0.848868	0.116866	0.236732	0.205883	1.06627	0.636078
C00475	1	1	1	2.79158	3.00001	112.376	0.334425	0.781183	0.278159	0.156977	0.333555	0.245266
C00483	1	1	1	0.135383	0.108797	0.145032	0.0630544	0.061114	0.057687	0.135851	0.269971	0.202911
C00495	1	1	1	1.20335	1.0447	1.46666	0.659998	0.531067	0.465755	0.63735	0.665977	0.651663
C00499	1	1	1	0.718952	0.704802	1.06064	0.604322	0.570008	0.592088	0.666898	0.700756	0.683827
C00500	1	1	1	0.804581	0.801069	1.02192	0.749084	0.777311	0.792412	0.702677	0.751206	0.726941
C00505	1	1	1	1.30492	1.2899	1.27743	1.22553	1.2505	1.15557	0.504799	1.27987	0.892335
C00525	1	1	1	1.34486	1.05268	18.6274	0.421956	0.404338	0.0513757	0.590475	0.71324	0.651858
C00526	1	1	1	0.856475	0.933692	0.89179	1.75885	2.65361	3.09228	0.718297	0.792648	0.755473
C00530	1	1	1	1.51538	5.47353	1.17511	0.850776	0.485252	1.25332	0.386966	0.997879	0.692422
C00535	1	1	1	0.421687	0.52275	1.55489	0.571891	0.680746	0.618152	0.111596	0.444294	0.277945
C00539	1	1	1	0.48954	0.484349	0.523623	0.435357	1.15356	0.400874	2.28426	0.605329	1.4448
C00546	1	1	1	0.95765	0.91305	0.514241	1.52609	1.62496	2.04449	1.05588	0.695161	0.875521
C00550	1	1	1	1.30931	6.33198	7.28661	0.953499	0.739076	0.730334	0.765599	0.96381	0.864705
C00571	1	1	1	0.877833	0.864101	0.833261	0.933462	1.00021	1.03022	0.60992	0.701191	0.655556
C00584	1	1	1	0.722084	0.648664	0.726584	0.714582	0.721604	0.931372	0.889844	1.44368	1.16676
C00588	1	1	1	3.07213	2.68873	2.93507	0.318615	0.344919	0.277185	1.93485	3.68726	2.81106
C00596	1	1	1	0.897635	0.478341	0.998706	0.92066	0.394483	0.484151	0.842996	0.33015	0.586573
C00601	1	1	1	0.994205	0.916496	0.961543	0.740574	0.632377	0.624589	0.678386	0.988468	0.833427
C00624	1	1	1	0.668625	0.733134	0.703005	0.691668	0.732614	0.688419	0.746152	0.741414	0.743783
C00631	1	1	1	12.1891	14.0705	3.94311	0.851974	1.04987	0.912666	0.737888	0.900676	0.819282
C00633	1	1	1	0.711441	1.18722	4.42559	0.602358	0.144601	0.237633	0.162456	1.16281	0.662635
C00644	1	1	1	1.11272	0.966272	1.16386	0.978301	1.17473	1.08925	0.668093	1.0072	0.837649
C00655	1	1	1	0.801034	0.773611	1.16013	0.648442	0.570015	0.591657	0.671462	0.719223	0.695343
C00666	1	1	1	2.1517	6.02107	13.4728	3.18245	9.18576	8.506	2.80627	0.070689	1.43848
C00668	1	1	1	2.68661	3.74071	1.12915	1.28588	1.03696	0.160752	0.429035	1.14572	0.787375
C00670	1	1	1	1.01195	0.934409	20.9071	0.869317	0.956913	0.8279	0.659835	0.724756	0.692295
C00695	1	1	1	0.734507	0.18232	0.245322	0.122093	0.0607453	0.0794023	0.142445	0.686771	0.414608
C00700	1	1	1	5.24325	0.351842	0.352705	1.01344	0.952078	1.95879	1.61746	0.611749	1.11461
C00703	1	1	1	0.543802	1.85628	2.23012	1.92683	1.55771	3.21435	0.774661	1.66372	1.21919
C00712	1	1	1	0.859443	0.415904	13.29	0.15954	0.171435	0.117693	3.15154	0.472738	1.81214
C00740	1	1	1	0.96333	0.994886	1.64621	0.641055	0.650389	0.620637	0.928341	0.958373	0.943357
C00747	1	1	1	0.0791697	0.0185108	0.101118	0.06784	0.083335	0.0933536	0.0287262	0.0130111	0.0208686
C00753	1	1	1	0.260954	0.255177	0.273717	0.260702	0.263768	0.263315	2.30979	0.261395	1.28559
C00757	1	1	1	1.03908	1.4266	1.213	1.2374	1.26844	1.33167	1.02433	1.09883	1.06158
C00768	1	1	1	1.0255	0.814074	2.07627	0.807034	2.17493	0.653944	0.672629	0.430731	0.55168
C00786	1	1	1	1.22401	1.00296	0.893836	1.11772	1.1799	1.57717	1.57256	3.4256	2.49908
C00788	1	1	1	0.85148	0.784973	1.23731	0.53931	0.600071	0.574088	0.703542	0.724762	0.714152
C00791	1	1	1	8.0596	0.718328	35.3084	0.633675	2.84667	2.59157	3.15083	0.332423	1.74163
C00802	1	1	1	1.30001	1.17413	3.13604	0.8963	1.1871	1.00433	0.702617	0.895448	0.799033
C00805	1	1	1	0.378086	0.385586	0.489168	0.39065	0.369404	0.382447	0.928002	0.38656	0.657281
C00810	1	1	1	0.671876	0.663115	0.646811	0.646051	0.631545	0.628128	0.940725	0.701783	0.821254
C00813	1	1	1	0.724325	0.573489	0.84267	0.311205	0.224357	0.230803	0.495744	0.622645	0.559195
C00826	1	1	1	0.829798	0.743336	0.838515	0.586249	0.48053	2.99982	1.45619	0.73147	1.09383
C00828	1	1	1	1.44114	0.0702671	0.352644	0.0230017	0.0213358	0.0111743	0.0174883	1.69309	0.855287
C00829	1	1	1	0.695759	0.696233	0.803613	0.603571	0.601651	0.594365	0.987603	0.761778	0.87469
C00830	1	1	1	0.368893	0.239187	0.327084	0.393458	0.553219	0.265501	1.06499	0.255459	0.660226
C00837	1	1	1	8.12553	5.75964	4.87265	1.00624	0.752661	0.0828168	0.0505761	3.43556	1.74307
C00844	1	1	1	1.14035	1.00184	1.7543	1.01034	1.14615	0.99753	0.799126	0.820284	0.809705
C00855	1	1	1	0.123755	0.139755	0.098185	0.119183	0.102818	0.101983	0.144558	0.167448	0.156003
C00896	1	1	1	1.18575	1.12149	1.37419	0.998113	1.13228	0.98546	0.791718	0.840976	0.816347
C00898	1	1	1	0.909723	0.763631	0.9287	4.44137	1.45791	1.19039	1.07506	0.87682	0.975939
C00902	1	1	1	2.71951	2.67098	1.58887	0.486927	1.07616	3.30321	1.18528	2.39169	1.78848
C00903	1	1	1	1.18946	1.03264	1.44972	0.652375	0.524933	0.460376	0.629989	0.658286	0.644137
C00906	1	1	1	2.43334	0.433169	0.759025	0.720716	0.73121	0.477375	0.887447	0.63368	0.760564
C00921	1	1	1	0.8258	0.843973	0.796736	0.898665	0.892302	0.921507	0.903374	0.847449	0.875412
C00922	1	1	1	0.891863	0.898172	0.903942	0.973433	0.965735	0.97423	0.887813	0.855676	0.871745
C00928	1	1	1	0.350328	89.3003	1329.58	3.00224	2.617	0.854469	0.317501	0.333621	0.325561
C00931	1	1	1	0.233621	0.253784	0.59895	0.199847	0.192932	0.207237	0.398158	0.221786	0.309972
C00939	1	1	1	0.499356	1.31834	1.67123	1.40771	0.813462	1.11892	1.98538	0.343051	1.16421
C00954	1	1	1	1.32487	1.27591	0.907173	1.37995	1.36181	1.05431	1.59222	1.78987	1.69104
C00986	1	1	1	1.39039	4.08253	2.67303	0.667097	0.225099	0.667814	0.248395	0.205912	0.227153
C00988	1	1	1	1.75924	1.97543	1.86343	1.73014	1.81661	1.68593	1.90846	2.17912	2.04379
C00990	1	1	1	2.16415	0.107536	1.207	0.0621822	1.07212	1.00497	0.059355	0.49398	0.276668
C01004	1	1	1	0.0817606	0.105033	0.28955	0.0556465	0.146443	0.0373783	0.275874	0.408659	0.342267
C01010	1	1	1	0.795016	0.767451	0.945867	0.56989	0.647756	0.563102	0.626932	0.608328	0.61763
C01017	1	1	1	0.751418	0.663232	1.2605	0.49734	0.458381	0.452522	0.626467	0.756085	0.691276
C01023	1	1	1	0.953683	0.983667	1.02728	0.830842	0.683704	0.808608	0.980923	0.961343	0.971133
C01035	1	1	1	0.601982	0.845159	0.731456	0.355107	0.337035	0.319391	0.58318	0.571016	0.577098
C01041	1	1	1	0.721251	0.736158	0.894651	0.728793	0.718417	0.765987	1.28379	0.736299	1.01005
C01053	1	1	1	1.01236	1.11089	1.04858	0.854772	1.84751	2.47744	0.796616	0.479317	0.637966
C01059	1	1	1	0.771515	4.61909	1.77388	0.91258	1.9562	0.751629	1.17908	0.880641	1.02986
C01061	1	1	1	0.99736	0.557107	1.20809	1.46607	0.856555	0.843649	0.71641	0.685527	0.700969
C01068	1	1	1	1.19999	1.13496	1.39069	1.1476	1.43387	1.40731	0.798936	0.851074	0.825005
C01079	1	1	1	0.0305118	0.550548	0.125882	0.260671	0.0132711	0.00879882	0.0164108	0.0639096	0.0401602
C01081	1	1	1	0.718068	0.652225	0.716512	0.431767	0.368394	0.404343	1.20693	0.733662	0.970296
C01091	1	1	1	1.39618	1.21742	1.56538	0.96412	0.922165	0.945056	2.14614	1.50466	1.8254
C01103	1	1	1	3.06343	2.31591	3.8499	8.81338	9.12781	5.26013	5.42851	2.54486	3.98669
C01104	1	1	1	0.738609	1.16622	0.846025	0.682926	0.874043	0.404947	0.477248	0.455376	0.466312
C01118	1	1	1	0.696365	0.585157	0.757522	0.456524	0.433292	0.432446	0.985975	0.734097	0.860036
C01133	1	1	1	0.614833	0.533223	0.69007	0.444318	0.4365	0.40997	1.09543	0.699441	0.897434
C01134	1	1	1	0.633669	0.549558	0.725392	0.477483	0.449872	0.42253	1.11709	0.772965	0.945028
C01136	1	1	1	9.74701	6.25053	3.35788	4.47202	4.41926	5.73737	0.548485	9.47265	5.01057
C01137	1	1	1	0.567953	0.495566	0.692403	0.182764	0.145836	0.139097	0.585096	0.55215	0.568623
C01142	1	1	1	0.722808	0.71933	0.779658	0.713831	0.6945	0.702477	0.660827	0.764674	0.712751
C01143	1	1	1	0.371	0.304617	0.307344	0.32537	0.327017	0.333227	1.16189	0.321663	0.741778
C01169	1	1	1	11.3727	1.29922	1.17491	0.462737	0.440679	0.439794	1.95435	0.601759	1.27805
C01179	1	1	1	1.01474	0.871836	0.509903	0.511265	0.715799	0.739534	0.447037	0.285166	0.366102
C01185	1	1	1	0.989442	0.889398	1.489	0.828296	0.775198	0.75704	0.671462	0.719223	0.695343
C01194	1	1	1	0.321311	0.301687	0.290036	0.319316	0.321457	0.316543	0.300714	0.315189	0.307952
C01205	1	1	1	0.665563	0.629436	0.497956	0.338141	0.250486	0.435546	1.14254	1.09273	1.11764
C01207	1	1	1	3.48798	4.61539	30.8961	1.16464	1.00028	0.271208	2.23352	1.00523	1.61937
C01210	1	1	1	0.0485237	0.138504	0.548702	0.208985	0.0476546	0.0375289	1.322	0.417126	0.869565
C01214	1	1	1	0.52736	0.999829	0.381214	2.01994	1.75183	1.8539	0.565207	0.700786	0.632996
C01215	1	1	1	1.01636	2.45899	1.54333	1.79408	1.92326	0.443938	0.447071	2.86325	1.65516
C01227	1	1	1	26.7372	30.1682	20.4374	6.69143	1.85488	3.77224	1.09667	12.9648	7.03075
C01234	1	1	1	0.602237	0.574437	0.953934	0.296289	0.277138	0.272499	0.605922	0.673717	0.639819
C01235	1	1	1	0.831006	0.875084	0.793925	0.925536	0.92104	0.952304	0.882936	0.862544	0.87274
C01239	1	1	1	0.733114	0.60411	0.715087	0.558367	0.521485	0.486416	0.907297	0.722639	0.814968
C01252	1	1	1	1.36687	1.03785	7.41944	4.30558	0.714886	2.61201	7.72803	1.0112	4.36961
C01263	1	1	1	0.839944	0.795748	1.06716	0.441956	0.343568	0.356313	0.599473	0.896083	0.747778
C01266	1	1	1	0.684975	0.656754	0.803756	0.703404	0.694519	0.686934	1.12257	0.680486	0.901527
C01267	1	1	1	1.14329	1.30189	1.28879	1.10013	1.1603	1.11808	0.937795	1.53284	1.23532
C01279	1	1	1	0.373593	0.401544	0.377998	0.395935	0.392944	0.369613	1.20346	0.41026	0.806859
C01294	1	1	1	0.535281	0.588055	0.627295	0.49717	0.523363	0.497065	1.1663	0.56389	0.865096
C01298	1	1	1	0.692528	0.635882	0.678213	0.688652	0.759925	0.660471	0.665587	0.667846	0.666716
C01300	1	1	1	0.689926	0.658326	0.75636	0.717052	0.686044	0.6876	0.761714	0.719452	0.740583
C01397	1	1	1	3.52575	0.899403	0.882367	0.465042	0.425186	0.75371	1.09641	2.04134	1.56888
C01403	1	1	1	1.07549	1.22058	0.19131	0.121729	0.506912	0.556195	2.09972	1.20981	1.65476
C01407	1	1	1	12.2054	7.53215	25.351	2.09616	1.23545	6.16239	11.0766	40.9763	26.0265
C01412	1	1	1	0.5299	0.531847	2.07433	0.744861	0.111955	0.289039	1.49995	4.94113	3.22054
C01416	1	1	1	0.194666	0.336333	0.319685	0.287742	0.276914	0.512782	0.626657	0.669111	0.647884
C01444	1	1	1	0.878877	1.01058	0.956486	0.567893	0.645486	0.561129	0.624735	0.606196	0.615466
C01451	1	1	1	1.05531	0.953264	1.0628	0.928085	1.23129	1.05611	0.772663	0.862609	0.817636
C01453	1	1	1	0.560179	0.174162	0.502987	0.20508	0.140279	0.0778352	1.02551	0.594031	0.809772
C01455	1	1	1	0.113324	0.254754	0.28525	0.389877	0.271153	0.359412	0.368739	0.379448	0.374094
C01468	1	1	1	0.73633	0.588491	0.662524	1.27317	0.546553	0.488436	0.335134	4.11735	2.22624
C01474	1	1	1	0.55868	0.574511	0.610122	0.522035	0.483231	0.522018	0.53234	0.941162	0.736751
C01512	1	1	1	0.567935	0.584416	0.616354	0.615308	0.586843	0.554137	0.855914	0.585706	0.72081
C01523	1	1	1	0.927586	0.915339	0.945007	0.83945	0.689035	0.717752	0.964367	0.923693	0.94403
C01526	1	1	1	0.769818	0.6949	0.595889	2.20205	2.51824	2.70946	0.728947	0.519946	0.624447
C01530	1	1	1	0.00487127	0.00525091	0.00584133	0.00541982	0.00557978	0.00910447	1.72078	0.00559769	0.863188
C01536	1	1	1	0.611894	4.13681	0.756577	3.35911	0.551842	3.34176	1.0253	0.879661	0.952479
C01541	1	1	1	1.1618	1.07283	1.24002	0.927166	1.04759	0.987366	0.801652	0.919261	0.860456
C01546	1	1	1	0.264996	1.44502	0.215901	0.131293	0.139096	0.0960351	0.262105	0.551543	0.406824
C01550	1	1	1	0.984019	0.804385	0.96436	0.610449	0.514034	0.556645	0.655778	0.950132	0.802955
C01552	1	1	1	0.186812	0.198819	0.216585	0.204051	0.215083	0.207999	2.28111	0.217101	1.24911
C01563	1	1	1	0.00400388	0.0123362	0.0591303	0.00378166	0.00358604	0.0217375	0.601781	0.396876	0.499328
C01569	1	1	1	0.940399	0.954162	0.457707	1.25524	1.26965	1.26331	0.626321	0.694799	0.66056
C01589	1	1	1	0.276614	1.02915	0.726835	0.73684	0.832239	0.753606	0.33747	0.925796	0.631633
C01594	1	1	1	0.375813	0.36916	0.527752	0.251687	0.358719	0.385629	0.444144	0.56685	0.505497
C01596	1	1	1	3.34919	2.0668	0.538167	0.520228	2.18885	0.552975	0.56686	0.460659	0.51376
C01598	1	1	1	1.0483	0.38269	0.563033	0.219131	0.0292267	0.114254	0.214819	1.05389	0.634355
C01617	1	1	1	0.818371	0.905547	1.01803	0.829083	1.02166	0.888143	0.736567	0.876476	0.806521
C01618	1	1	1	0.823055	0.851757	0.841846	0.799805	0.799055	0.782375	0.742033	1.36243	1.05223
C01620	1	1	1	1.00056	1.24451	0.381706	0.30714	0.139672	0.163308	0.468858	0.601572	0.535215
C01620.	1	1	1	1.95576	1.87746	0.524715	0.324695	0.0715526	0.14247	1.0899	0.0919286	0.590913
C01630	1	1	1	1.2439	1.22416	1.19991	0.916359	1.12213	0.98402	0.636029	0.92051	0.77827
C01632	1	1	1	4.32125	5.80692	1.64136	0.64048	0.637925	0.569089	0.960467	0.83828	0.899374
C01657	1	1	1	0.844737	0.700838	0.980679	0.421924	0.353652	0.457839	0.605888	0.870809	0.738349
C01659	1	1	1	0.255285	0.288291	0.216856	0.251391	0.212095	0.219433	0.214814	0.2324	0.223607
C01672	1	1	1	0.252837	0.259326	0.513773	0.537905	0.513472	0.803935	0.223984	0.437173	0.330578
C01674	1	1	1	11.8863	12.3816	11.8429	0.598568	0.619616	0.599438	0.884838	0.631225	0.758031
C01678	1	1	1	0.787937	0.85677	0.954113	0.712027	0.695312	0.668939	1.02758	0.885116	0.956348
C01683	1	1	1	0.822018	0.616676	0.858994	0.502587	0.441603	0.638655	0.914759	0.829452	0.872106
C01697	1	1	1	0.649778	2.36134	15.8598	0.0938574	0.702706	0.0831356	1.89629	1.47703	1.68666
C01700	1	1	1	0.521613	0.449224	0.695576	0.182627	0.132699	0.12576	0.539531	0.497584	0.518558
C01708	1	1	1	1.57431	0.950494	1.50559	0.885195	0.631917	0.65153	0.639831	0.708249	0.67404
C01727	1	1	1	0.673307	0.62642	0.767267	0.477464	0.441445	0.42258	0.748794	0.737131	0.742962
C01746	1	1	1	1.02606	0.582961	11.1123	0.23788	0.130544	0.0964278	0.427479	0.55429	0.490884
C01768	1	1	1	0.141687	0.118251	0.161968	1.46352	0.984803	0.989516	1.66804	0.231626	0.949832
C01770	1	1	1	0.689979	0.504299	0.565119	0.90527	1.2529	0.23277	0.441704	0.886339	0.664022
C01784	1	1	1	0.231034	0.281011	0.275488	0.305311	0.270449	0.31044	0.410879	0.586796	0.498838
C01796	1	1	1	1.04001	1.29171	1.23234	1.14395	0.774111	0.677494	0.749398	0.996068	0.872733
C01804	1	1	1	0.692879	0.657292	0.65986	0.523668	0.513999	0.479127	0.757	0.739394	0.748197
C01854	1	1	1	0.575987	0.0541833	0.0527362	0.023245	0.0413351	0.0230379	0.175823	0.0544918	0.115158
C01857	1	1	1	1.06463	0.961685	1.06422	0.936283	1.24217	1.0759	0.779489	0.886543	0.833016
C01864	1	1	1	1.08919	4.10668	1.64034	0.505153	2.03581	0.511802	1.24011	0.650143	0.945125
C01874	1	1	1	1.27402	1.27713	1.21729	1.29348	1.28407	1.31109	0.971863	1.21987	1.09586
C01879	1	1	1	0.111911	0.170189	0.321586	0.0947478	0.0560756	0.0567548	0.415886	0.398967	0.407426
C01880	1	1	1	0.715735	0.702351	0.772025	0.657273	0.720411	0.669766	0.700708	0.681804	0.691256
C01921	1	1	1	0.411744	0.394781	4.91418	0.422823	0.417481	0.412922	0.674786	0.409046	0.541916
C01964	1	1	1	0.887186	0.894273	0.986232	0.835801	0.965137	0.895893	0.725105	0.967848	0.846476
C01987	1	1	1	2.59919	2.25178	0.395982	1.72136	1.64883	1.46468	0.144459	0.379886	0.262173
C01990	1	1	1	1.01781	0.978279	8.78823	0.911071	0.763188	0.643194	0.658534	0.728952	0.693743
C01993	1	1	1	0.00960651	0.863845	0.0185169	0.196239	0.00690009	0.00623757	0.10147	0.469012	0.285241
C01995	1	1	1	0.665204	0.645254	0.430143	0.473497	0.444513	0.430958	0.686994	0.74646	0.716727
C02008	1	1	1	0.511368	0.526208	22.4794	0.554023	0.51793	0.498945	0.770664	0.524256	0.64746
C02009	1	1	1	3.2192	0.590337	1.35899	0.755277	0.719515	0.872726	0.415307	0.64491	0.530108
C02010	1	1	1	0.286348	0.310641	0.355578	0.485393	1.08891	0.881461	1.92805	0.323785	1.12592
C02027	1	1	1	1.7142	0.556883	1.18648	0.299547	0.324416	0.300442	1.98754	2.19826	2.0929
C02034	1	1	1	1.42715	1.98002	1.37387	2.18006	2.61586	1.57342	1.3487	0.742712	1.0457
C02059	1	1	1	0.376353	0.108312	0.249789	0.12393	0.0463037	0.0653198	0.0474891	0.386813	0.217151
C02066	1	1	1	1.05121	1.29161	1.68322	1.28104	1.23013	1.48759	1.10791	1.19841	1.15316
C02067	1	1	1	0.710922	0.686441	0.718941	0.761603	0.701771	0.734058	0.753373	0.73315	0.743261
C02074	1	1	1	2.43683	1.93059	2.26651	0.902522	0.509597	0.573551	1.26353	2.90948	2.0865
C02075	1	1	1	0.0931126	0.0924596	0.112261	0.19259	0.13467	0.169302	0.0542521	0.0262692	0.0402607
C02078	1	1	1	3.44291	4.77516	4.95079	0.939762	1.70037	2.23067	0.728661	1.01872	0.873691
C02115	1	1	1	0.888174	0.555795	0.675722	0.410278	0.383863	0.374387	0.59024	0.629372	0.609806
C02126	1	1	1	1.56716	0.519517	0.474148	0.931939	0.961358	0.483253	0.474009	0.530891	0.50245
C02134	1	1	1	0.829429	0.828384	1.22268	0.672727	0.672608	0.667222	0.710225	0.705257	0.707741
C02137	1	1	1	1.14338	1.06872	1.19614	0.932975	1.01772	0.976379	0.797392	0.937995	0.867693
C02174	1	1	1	0.540478	0.435966	0.547387	0.407352	0.800334	0.392537	0.29308	0.542048	0.417564
C02199	1	1	1	0.790326	0.76901	0.814972	0.571047	0.599622	0.473211	0.480043	0.592566	0.536304
C02214	1	1	1	0.472393	0.428345	0.785853	0.347857	0.376648	0.34501	0.367247	0.364678	0.365963
C02218	1	1	1	0.763977	0.896403	1.30482	0.187904	0.861949	0.508314	0.991104	0.959355	0.975229
C02223	1	1	1	0.00147488	0.00300512	0.00436597	0.00108511	0.00120282	0.00108913	0.888962	0.015334	0.452148
C02224	1	1	1	2.56013	3.4381	0.373772	0.762493	0.908878	3.98186	0.244173	1.56021	0.902192
C02234	1	1	1	1.47664	6.79689	52.7261	1.0498	1.93204	1.09495	0.889559	1.1526	1.02108
C02240	1	1	1	0.831767	1.55757	0.597097	1.407	0.975897	1.04934	1.3628	1.14661	1.2547
C02242	1	1	1	7.29626	2.43793	7.89138	1.47308	1.0959	0.845532	2.12407	1.37164	1.74785
C02243	1	1	1	0.521096	0.490885	0.691191	0.445039	0.425363	0.408095	1.14347	0.628203	0.885838
C02304	1	1	1	0.689194	0.609732	0.938679	0.597728	0.587824	0.549025	0.91571	0.615492	0.765601
C02334	1	1	1	1.03506	0.945013	0.91973	1.71479	0.310254	0.320933	1.33638	1.00752	1.17195
C02341	1	1	1	4.43717	3.85005	5.20573	4.78561	27.2527	26.143	0.709199	1.65548	1.18234
C02351	1	1	1	0.375016	0.399274	0.284141	0.27586	0.895612	0.620211	0.193903	1.77861	0.986258
C02362	1	1	1	0.868385	0.83041	0.907628	0.880746	0.921373	0.920268	0.844326	0.909833	0.877079
C02366	1	1	1	0.576235	0.715124	0.331487	0.257457	0.208494	0.164233	2.1419	2.15304	2.14747
C02367	1	1	1	0.659885	0.694317	0.675427	0.755459	0.761363	0.733365	0.652356	0.725315	0.688835
C02372	1	1	1	0.329884	0.419303	0.305019	0.179047	0.280677	0.263106	0.239328	2.31788	1.27861
C02376	1	1	1	0.584925	0.567695	0.554234	0.592647	0.566101	0.605095	1.0703	0.591676	0.830989
C02389	1	1	1	0.744562	0.70048	0.743389	0.712963	0.687421	0.711332	0.746212	0.831069	0.788641
C02395	1	1	1	3.30851	2.52508	3.99483	1.14109	0.677547	0.800455	2.79398	4.1969	3.49544
C02413	1	1	1	3.9044	0.822282	2.1625	5.64327	0.692712	0.718207	0.255435	0.598493	0.426964
C02420	1	1	1	1.15836	1.11673	0.784534	1.41986	1.29888	1.33809	0.234954	0.866416	0.550685
C02445	1	1	1	0.801768	1.8911	0.920295	1.68977	2.76177	0.673085	1.07907	0.714717	0.896896
C02455	1	1	1	0.796361	0.808175	0.648278	1.05902	1.15545	1.22083	1.2471	0.808716	1.02791
C02486	1	1	1	0.41405	0.356589	4.19182	0.11914	0.0651544	0.0427815	0.340138	0.597004	0.468571
C02494	1	1	1	0.783742	0.691762	1.02992	0.518734	0.468503	0.471989	0.653416	0.78861	0.721013
C02499	1	1	1	0.688989	0.671104	0.689788	0.738205	0.736734	0.691168	0.772056	0.704557	0.738307
C02502	1	1	1	0.0780289	0.0890276	0.0846901	0.0785983	0.0776059	0.082784	0.385389	0.405735	0.395562
C02571	1	1	1	0.157847	1.13749	0.393509	0.125379	0.0369917	0.0358967	0.576323	0.318363	0.447343
C02572	1	1	1	0.172136	0.600108	1.03399	0.0996724	0.0631515	0.0630247	0.0977171	0.0907805	0.0942488
C02590	1	1	1	0.606443	0.536061	0.650728	0.463669	0.441642	0.450238	0.545987	0.634994	0.590491
C02604	1	1	1	0.800651	0.766795	1.15236	0.60637	0.55887	0.534671	0.693912	0.755711	0.724811
C02617	1	1	1	1.41599	1.53155	1.15404	0.545485	0.519482	0.518439	0.803818	0.746757	0.775288
C02621	1	1	1	0.699624	0.650905	0.797257	0.496127	0.435162	0.439098	0.764688	0.765943	0.765316
C02628	1	1	1	0.812658	0.824417	0.819939	0.887258	0.908132	0.947773	0.92132	0.839454	0.880387
C02630	1	1	1	0.868058	0.998144	0.944711	0.560902	0.63754	0.554221	0.617044	0.598734	0.607889
C02633	1	1	1	0.0435781	0.0764836	0.0807719	0.0500586	0.0334394	0.0704786	0.0274364	0.185806	0.106621
C02636	1	1	1	8.65854	1.8339	3.55501	2.05502	3.53862	0.430807	0.570778	9.95026	5.26052
C02640	1	1	1	0.73155	1.42054	1.7638	0.64419	0.691107	0.679611	1.9453	0.76891	1.35711
C02646	1	1	1	0.125865	0.086478	0.112906	0.041574	0.074809	0.215253	0.128376	0.111528	0.119952
C02647	1	1	1	0.664796	1.43825	2.77484	0.133204	0.0484307	0.0262931	0.111071	0.585984	0.348528
C02648	1	1	1	0.414315	0.41253	0.0564434	0.295107	0.272602	0.267662	0.719928	0.476956	0.598442
C02659	1	1	1	0.318468	0.398185	0.304137	0.286966	0.227941	0.2613	0.727428	0.671822	0.699625
C02678	1	1	1	0.223036	0.183325	0.274807	0.104415	0.301368	0.0947096	1.94576	0.240175	1.09297
C02683	1	1	1	0.596419	0.654245	0.68893	0.652253	0.58571	0.617332	0.739051	0.708103	0.723577
C02703	1	1	1	0.923656	0.898026	1.24161	0.685326	0.551447	0.427696	0.661809	0.665547	0.663678
C02704	1	1	1	0.569794	0.586329	0.617565	0.554903	0.577105	0.555951	0.858715	0.584154	0.721434
C02724	1	1	1	0.85932	0.853011	2.07897	0.657224	0.582499	0.523891	0.90035	1.28606	1.09321
C02726	1	1	1	0.171623	1.50127	1.39808	1.80557	1.80587	1.73643	0.0286955	0.204172	0.116434
C02730	1	1	1	0.899549	1.03435	0.959187	0.455517	0.428729	0.423206	0.639429	0.609583	0.624506
C02735	1	1	1	7.53887	6.11411	46.0677	1.07072	0.0718065	0.0864806	0.636504	0.381791	0.509148
C02771	1	1	1	0.814166	0.66953	0.920955	0.319831	0.281148	0.260847	0.335565	1.70958	1.02257
C02777	1	1	1	1.48914	0.74236	1.99773	3.24802	0.613648	0.565573	0.704045	1.27399	0.989016
C02787	1	1	1	0.798999	0.847309	0.784291	1.40868	1.40894	1.43935	0.531794	0.677524	0.604659
C02794	1	1	1	0.936415	1.02084	1.88376	5.42861	8.38048	7.44099	0.78534	0.866631	0.825985
C02845	1	1	1	0.263729	1.1927	0.885593	0.50568	1.05858	1.59747	0.533643	0.722669	0.628156
C02862	1	1	1	0.590329	0.716883	0.803889	2.43976	1.88423	0.808069	1.03792	0.560989	0.799455
C02890	1	1	1	0.0762599	0.101981	0.226834	0.0831179	1.45396	0.932907	0.10913	0.134472	0.121801
C02916	1	1	1	0.132096	0.127516	0.153936	0.0908987	0.0918662	0.0763974	0.104168	0.0956468	0.0999075
C02918	1	1	1	1.09043	3.79479	2.36001	0.560236	0.440003	0.377742	0.479754	0.565605	0.522679
C02923	1	1	1	0.106677	0.105728	0.0780482	0.163426	0.158327	0.180726	0.162759	0.149613	0.156186
C02927	1	1	1	0.516622	2.08398	1.34825	0.85971	0.590745	0.586346	1.37679	0.556273	0.966532
C02937	1	1	1	1.17173	1.06761	1.10995	1.04817	0.961044	1.04803	0.497211	0.986444	0.741827
C02947	1	1	1	1.43585	1.60462	1.40802	0.553138	0.547236	0.525713	0.823925	0.71932	0.771622
C02951	1	1	1	1.09429	3.65918	0.910889	0.571047	0.599622	0.460728	0.537159	0.592566	0.564862
C02954	1	1	1	0.245362	0.238546	0.292674	0.181794	0.18299	0.184587	2.83589	0.242465	1.53918
C02979	1	1	1	0.166011	0.148491	0.153463	0.153349	0.153051	0.150256	0.761494	0.157451	0.459472
C02990	1	1	1	0.889542	0.990163	1.13451	1.00076	0.776492	0.948518	0.913901	0.905148	0.909524
C03002	1	1	1	0.0230534	0.0366959	0.501292	0.237027	0.0354896	0.0998471	0.826178	0.197834	0.512006
C03007	1	1	1	0.540392	3.08591	1.76029	2.81671	0.576561	0.391609	0.316834	2.56296	1.4399
C03017	1	1	1	0.472448	0.887711	0.383358	0.675012	0.917273	1.25608	0.245272	0.28213	0.263701
C03019	1	1	1	0.742602	0.774285	0.777808	0.633111	0.624277	0.639495	0.902871	0.717878	0.810375
C03032	1	1	1	0.877125	0.820159	0.838185	0.547755	0.436922	0.451121	0.544483	0.862148	0.703315
C03033	1	1	1	0.257286	0.109554	0.210333	0.0300749	0.0122291	0.0115177	0.0272028	0.0625525	0.0448777
C03047	1	1	1	0.533561	0.444354	0.717079	0.176096	0.136305	0.124568	0.5332	0.521795	0.527498
C03059	1	1	1	1.85195	1.768	1.61883	1.45876	2.08114	2.08971	2.16042	2.31404	2.23723
C03065	1	1	1	2.88171	3.32231	15.6347	0.603191	0.597896	0.59098	0.66565	0.681331	0.673491
C03066	1	1	1	1.20288	1.04429	1.79455	0.659738	0.530858	0.465572	0.637099	0.640698	0.638898
C03093	1	1	1	0.997796	1.18204	1.22373	1.06327	1.04757	0.96114	0.802448	0.827353	0.814901
C03113	1	1	1	0.979567	0.960359	0.957902	0.85218	0.738135	0.75155	0.911706	0.931487	0.921597
C03124	1	1	1	0.868058	0.998144	0.944711	0.560902	0.63754	0.554221	0.617044	0.598734	0.607889
C03134	1	1	1	0.818432	0.894934	0.849504	1.28802	1.27356	4.3666	0.898226	0.861725	0.879975
C03137	1	1	1	0.868385	0.815347	0.821833	0.880746	0.871607	0.884937	0.824126	0.85184	0.837983
C03150	1	1	1	1.21903	1.98052	1.41275	1.02612	1.02762	0.993381	0.781725	0.864576	0.823151
C03154	1	1	1	0.693194	0.664635	1.67869	0.711845	0.691445	0.695177	1.13604	0.688652	0.912346
C03167	1	1	1	0.519502	0.527374	0.461218	0.495714	3.33746	0.321759	0.316142	0.257793	0.286967
C03169	1	1	1	0.751193	2.87853	1.36066	2.58683	3.90051	2.8173	1.43908	0.705739	1.07241
C03183	1	1	1	0.899549	1.03435	5.69157	0.445283	0.424057	0.423206	0.635764	0.609583	0.622674
C03196	1	1	1	0.716695	1.88751	1.12366	2.75326	2.19562	1.28001	0.466123	0.697296	0.58171
C03205	1	1	1	0.42829	0.394208	0.41485	0.323786	0.30096	0.28722	0.403244	0.433558	0.418401
C03210	1	1	1	0.819219	0.847708	0.831078	0.881591	0.933788	0.974548	0.94265	0.842796	0.892723
C03215	1	1	1	0.722567	0.754832	2.16894	2.60098	2.51718	0.808212	1.19221	0.744015	0.968114
C03218	1	1	1	0.34448	0.32839	0.371985	0.222858	0.234907	0.227171	2.49136	0.337404	1.41438
C03219	1	1	1	0.138403	0.47544	0.225289	0.0441578	0.0379829	0.155512	0.0327203	0.0312546	0.0319875
C03228	1	1	1	0.0402242	0.0467125	0.41564	0.0325438	0.0328774	0.0418147	1.31411	1.30569	1.3099
C03232	1	1	1	1.15568	1.21732	1.16919	1.24297	1.29162	1.26852	1.30411	1.24709	1.2756
C03283	1	1	1	0.248915	0.242374	0.240859	0.263332	0.233264	0.29128	0.388442	1.00169	0.695064
C03292	1	1	1	0.752926	1.62943	0.644186	0.545321	2.39777	2.09355	0.42752	3.04971	1.73862
C03299	1	1	1	0.536562	0.515167	0.541862	0.475486	0.450242	0.439534	0.566878	0.620762	0.59382
C03373	1	1	1	3.13133	2.26957	24.0981	0.100832	0.437738	0.0722883	0.304543	0.336926	0.320734
C03406	1	1	1	0.780831	0.753951	0.861076	0.685085	0.634162	0.691423	0.729221	0.709756	0.719489
C03411	1	1	1	1.13022	1.08613	4.44639	2.58277	2.0598	2.85315	1.83866	2.16109	1.99988
C03414	1	1	1	1.17611	0.946399	1.13428	0.357575	0.314446	0.266207	0.456641	1.30632	0.881481
C03434	1	1	1	15.2352	21.8847	8.12677	16.2333	27.6376	55.0389	0.780309	0.934107	0.857208
C03470	1	1	1	0.728198	0.757413	0.783619	0.645277	0.706665	0.619172	0.711907	0.721958	0.716933
C03494	1	1	1	1.05135	0.858552	0.802968	1.04199	0.804916	1.1968	0.774224	0.83298	0.803602
C03495	1	1	1	0.911295	1.04786	0.971712	0.461465	0.413817	0.428732	0.647779	0.599819	0.623799
C03506	1	1	1	1.57878	0.649053	32.9045	0.510055	2.26517	0.384237	0.522305	0.785468	0.653886
C03515	1	1	1	0.185868	0.173349	0.183078	0.165049	0.167558	0.168401	0.147907	0.201289	0.174598
C03526	1	1	1	0.911295	1.04786	0.971712	0.508803	0.450587	0.465592	0.647779	0.599819	0.623799
C03576	1	1	1	0.727287	0.71508	0.733879	0.703247	0.696135	0.663369	0.820999	0.7449	0.782949
C03584	1	1	1	2.12013	4.94489	5.55679	0.652213	0.475601	0.474725	0.497665	0.371039	0.434352
C03592	1	1	1	0.738897	0.737545	0.746088	1.24053	1.00075	0.778311	1.07063	0.809572	0.940102
C03626	1	1	1	2.03867	1.55971	5.1781	1.03819	2.72437	2.64894	0.19729	0.0564393	0.126865
C03657	1	1	1	0.923227	1.06158	1.33254	0.515465	0.456486	0.471688	0.65626	0.596788	0.626524
C03661	1	1	1	1.30811	1.23722	1.51599	1.05325	1.06644	0.999579	0.838852	0.927757	0.883305
C03690	1	1	1	1.32523	1.15236	1.86068	2.29158	2.67695	0.175584	0.069684	1.72462	0.897152
C03691	1	1	1	0.807886	0.662604	0.734831	0.358562	0.338637	0.412818	0.3045	0.79813	0.551315
C03725	1	1	1	0.757419	0.686353	0.821161	0.499924	0.467226	0.440714	0.704833	0.789684	0.747258
C03750	1	1	1	0.705621	1.11386	6.62435	0.349287	0.332637	0.331969	0.498704	0.478167	0.488435
C03767	1	1	1	7.76361	5.57222	4.2203	0.51704	0.488963	0.412779	1.36484	1.18301	1.27393
C03837	1	1	1	0.236006	1.65368	3.10155	0.116824	0.111255	0.111032	0.308228	0.487881	0.398055
C03840	1	1	1	0.454058	0.666616	1.16907	1.36082	1.39254	1.58648	0.990864	0.750755	0.87081
C03861	1	1	1	0.337378	0.335884	0.409482	0.446871	0.397709	0.383676	7.31999	0.334752	3.82737
C03872	1	1	1	0.829942	0.815389	0.89147	0.857568	0.856861	0.882051	0.938425	0.876049	0.907237
C03882	1	1	1	0.408974	0.376722	0.652099	1.02877	0.916168	0.655078	1.67209	0.639973	1.15603
C03912	1	1	1	0.416799	0.417189	0.446476	0.385722	0.375306	0.370236	0.461499	0.499581	0.48054
C03930	1	1	1	0.676491	0.637649	0.696628	0.975041	1.49903	0.744759	0.602928	0.604559	0.603744
C03943	1	1	1	0.58656	0.562645	2.39909	0.300605	0.271725	0.242052	0.471462	0.512822	0.492142
C03954	1	1	1	0.411827	0.0688023	0.136513	0.0350023	0.0233368	0.02329	0.0894139	0.145199	0.117306
C03958	1	1	1	0.493396	0.525394	0.748795	1.0378	0.437488	2.7239	0.548434	0.472205	0.510319
C03972	1	1	1	0.225689	0.21446	0.341636	0.845974	0.333853	1.07117	0.308969	0.635423	0.472196
C03982	1	1	1	1.01543	1.20319	1.43008	1.56321	1.72779	2.23109	1.05803	1.18491	1.12147
C04006	1	1	1	1.16626	0.907907	0.947259	0.781105	0.581287	0.764841	0.757512	1.04263	0.900069
C04015	1	1	1	0.595879	4.0479	1.08172	2.36456	0.865238	0.389875	0.348847	1.26307	0.805957
C04020	1	1	1	0.557678	0.298718	0.326924	0.292478	0.279261	0.264991	0.274936	0.35344	0.314188
C04022	1	1	1	0.258117	0.417752	0.414322	0.0882196	0.0448331	0.0336521	0.599916	0.256472	0.428194
C04033	1	1	1	1.17543	1.04526	0.953982	1.13952	1.11419	1.09024	0.6678	1.0514	0.859598
C04039	1	1	1	0.426719	0.390134	0.558235	1.15606	1.30312	3.35687	0.366053	0.586821	0.476437
C04067	1	1	1	0.90809	0.809642	0.838612	0.778457	0.761494	0.757854	1.03625	0.862333	0.949289
C04070	1	1	1	0.017955	0.0169063	0.0170138	0.0170459	0.0177659	0.0176134	1.64364	0.017778	0.830709
C04071	1	1	1	0.915449	0.893038	0.876571	0.882138	0.939783	0.92775	0.90072	0.898201	0.899461
C04084	1	1	1	0.299485	0.310892	0.388755	0.322975	0.307346	0.282639	1.86546	0.343197	1.10433
C04100	1	1	1	0.768199	0.726796	1.62839	0.54173	0.499319	0.465982	0.623908	0.865044	0.744476
C04102	1	1	1	0.909029	0.88627	0.115171	0.499404	0.151122	2.80845	0.387206	0.603218	0.495212
C04104	1	1	1	0.838088	0.886866	0.270336	1.37991	1.3376	1.38535	0.599251	0.581743	0.590497
C04114	1	1	1	4.1753	1.2248	4.79954	0.700779	0.822593	0.421271	0.379116	1.43934	0.909225
C04122	1	1	1	2.03685	1.8021	0.180988	0.197804	0.294522	0.103244	1.83095	1.70915	1.77005
C04144	1	1	1	0.194482	0.161327	0.208576	0.104547	0.0930455	0.0897622	2.81741	0.245766	1.53159
C04152	1	1	1	0.838267	4.9883	3.049	4.17979	1.57605	0.672073	0.376735	0.85834	0.617538
C04164	1	1	1	0.547703	0.629781	1.61886	0.271117	0.258193	0.257674	0.378616	0.371153	0.374884
C04166	1	1	1	0.575331	0.564168	1.62209	0.482289	0.484041	0.441386	1.29743	0.605762	0.951598
C04167	1	1	1	15.3012	13.3666	8.20847	2.1027	4.85285	5.05619	1.45136	1.16807	1.30972
C04181	1	1	1	3.74751	1.9163	1.01194	0.862902	0.538593	0.76841	0.776688	0.608475	0.692581
C04185	1	1	1	1.33361	1.15779	1.62542	0.673151	0.570036	0.516171	0.647505	0.738066	0.692786
C04197	1	1	1	1.47277	7.41537	2.35206	0.56736	0.540314	0.53923	0.845109	0.776704	0.810907
C04210	1	1	1	0.739648	0.671104	0.739692	1.05047	0.768334	1.64732	0.772056	0.704557	0.738307
C04216	1	1	1	0.182424	0.186049	0.217676	0.161009	0.164773	0.160497	1.86199	0.190665	1.02633
C04236	1	1	1	0.701576	0.721128	0.745662	0.632402	0.700868	0.684193	0.741784	0.728586	0.735185
C04251	1	1	1	0.040778	0.045967	0.0438864	0.184176	0.0406131	0.0364407	0.235262	0.0635782	0.14942
C04275	1	1	1	0.709673	0.571062	0.659113	0.362541	0.26361	0.280683	0.32183	0.78824	0.555035
C04277	1	1	1	0.187361	0.239142	0.519312	0.190223	0.199569	0.224271	0.44993	0.139489	0.29471
C04282	1	1	1	0.610786	0.504762	8.22452	0.619813	0.748776	0.81962	0.722391	5.5838	3.15309
C04297	1	1	1	0.0687228	0.221031	0.178653	2.93877	0.176058	0.888702	0.573263	0.0310366	0.30215
C04302	1	1	1	0.576811	0.446009	0.562273	0.203732	0.171519	0.146586	0.410152	0.604984	0.507568
C04308	1	1	1	0.484857	0.317861	0.838335	1.78613	1.61701	0.546571	1.87264	1.33085	1.60175
C04411	1	1	1	0.674663	0.722674	0.739826	0.770607	0.754675	0.811707	0.708901	0.710585	0.709743
C04421	1	1	1	2.50405	3.6987	1.87989	0.712501	0.761624	0.692854	0.654348	0.603668	0.629008
C04446	1	1	1	1.33007	0.733914	0.869046	1.23824	0.518182	1.77908	1.04856	0.795894	0.922226
C04454	1	1	1	0.677885	0.547857	0.797254	0.4625	0.443805	0.426283	0.880783	0.74871	0.814747
C04483	1	1	1	1.34163	1.33806	1.51639	0.660169	0.389546	0.445855	1.68129	1.50996	1.59562
C04485	1	1	1	1.10915	1.01286	1.11363	0.961315	1.23278	1.11499	0.788282	0.869346	0.828814
C04487	1	1	1	0.733438	0.675072	0.748474	0.559688	0.515388	0.503017	0.769001	0.822087	0.795544
C04500	1	1	1	0.837452	0.642471	0.809118	0.306119	0.698813	1.6947	0.572825	0.800055	0.68644
C04521	1	1	1	1.08468	0.998818	2.59345	0.961411	1.15775	1.06377	0.621472	0.978998	0.800235
C04529	1	1	1	1.63579	1.54155	3.10407	1.00626	2.73082	0.82085	0.672774	0.610393	0.641583
C04534	1	1	1	0.228008	0.180901	0.188786	0.117713	0.109125	0.234731	1.9218	0.725636	1.32372
C04544	1	1	1	0.0228467	0.235826	1.26252	0.025753	0.0220939	0.019229	0.0154486	0.289699	0.152574
C04546	1	1	1	0.196054	0.203786	0.240163	0.21116	0.185523	0.270633	0.358193	0.818406	0.5883
C04556	1	1	1	0.718382	0.698449	1.0935	1.54031	1.4771	0.332645	1.02165	0.573134	0.797394
C04584	1	1	1	1.4363	1.52357	1.43428	1.42049	1.37832	1.13145	0.93287	1.33868	1.13578
C04586	1	1	1	0.880722	0.739287	1.45915	2.05566	1.718	1.26075	1.04079	0.870174	0.95548
C04594	1	1	1	1.8722	1.52352	3.48146	0.814326	0.782733	0.7653	1.73518	1.93793	1.83656
C04596	1	1	1	7.55978	1.20449	2.22154	4.62757	0.927367	3.53686	0.400227	0.863394	0.63181
C04597	1	1	1	0.351166	1.56922	0.299061	0.78043	0.421685	0.569129	0.061391	0.295973	0.178682
C04638	1	1	1	0.67621	0.692826	0.730307	0.69084	0.69543	0.72008	0.805585	0.67473	0.740158
C04663	1	1	1	9.87241	5.78911	0.234343	0.657972	0.78406	0.182759	8.01954	0.604045	4.31179
C04670	1	1	1	0.908997	0.980132	0.897282	2.72702	2.05771	1.18608	0.322952	0.922664	0.622808
C04671	1	1	1	2.95803	2.45908	2.81633	1.03542	0.569723	0.676187	2.05584	3.277	2.66642
C04672	1	1	1	19.5855	18.482	18.5324	4.77595	2.62396	2.62453	0.912303	15.0918	8.00205
C04687	1	1	1	1.71271	1.3236	1.71376	6.22985	0.485983	3.61101	0.612999	0.339192	0.476095
C04690	1	1	1	0.659943	0.609709	1.19338	0.417412	0.4227	0.413857	0.570619	0.891941	0.73128
C04692	1	1	1	0.343547	0.649698	0.571942	0.580943	0.566466	0.536778	0.484573	0.388071	0.436322
C04695	1	1	1	0.353762	0.337239	0.380524	0.228863	0.241236	0.233292	2.55849	0.346495	1.45249
C04751	1	1	1	1.20288	1.04429	1.46609	0.659738	0.530858	0.465572	0.637099	0.665715	0.651407
C04771	1	1	1	1.15336	1.39658	0.239328	0.183235	0.347302	2.1362	0.444156	0.47313	0.458643
C04796	1	1	1	1.0389	0.933316	0.95923	0.629508	0.635663	0.640161	0.788513	0.883847	0.83618
C04831	1	1	1	1.39312	1.1696	1.36724	0.32884	0.266191	0.249244	0.546894	1.32673	0.936813
C04834	1	1	1	0.386166	0.547612	0.0855388	0.224813	0.220492	0.212604	0.0919025	0.590383	0.341143
C04849	1	1	1	0.467962	0.309503	2.56897	0.161808	0.152522	0.152835	2.33439	0.226798	1.28059
C04864	1	1	1	0.319012	0.316187	0.316995	0.328899	0.344195	0.329674	0.31355	0.332793	0.323171
C04883	1	1	1	0.443381	0.839275	0.591104	0.309144	1.0607	0.351647	0.676614	0.401677	0.539146
C04908	1	1	1	0.388547	1.70933	2.02727	0.82327	0.467974	0.50945	1.25201	0.82643	1.03922
C05021	1	1	1	0.765576	0.802976	0.682781	0.791348	0.711818	0.731555	0.64061	0.729507	0.685059
C05122	1	1	1	0.169155	0.246352	9.61315	0.164617	0.164501	0.152112	0.326568	0.211866	0.269217
C05130	1	1	1	0.184148	1.18594	0.822104	1.02811	1.02257	0.958383	0.115681	0.239016	0.177349
C05131	1	1	1	1.04441	0.918904	0.913431	0.613195	0.639035	0.643556	0.77559	0.885179	0.830385
C05143	1	1	1	1.05741	0.950494	1.50559	0.885195	0.82845	0.748905	0.639831	0.708249	0.67404
C05146	1	1	1	0.618813	0.653078	0.721477	0.663676	0.763197	0.839304	3.65604	0.750119	2.20308
C05158	1	1	1	0.3145	0.307456	0.364028	0.289217	0.313228	0.29008	1.9241	0.353986	1.13904
C05177	1	1	1	1.30405	1.04935	1.25767	0.316152	0.291058	0.256522	0.506315	1.46207	0.984194
C05183	1	1	1	0.70323	0.566394	0.660844	0.244581	0.177902	0.183649	0.481024	0.704724	0.592874
C05189	1	1	1	0.526542	1.69502	1.58387	0.678813	0.422038	0.493006	0.314066	0.62826	0.471163
C05193	1	1	1	0.846707	0.707899	0.81141	0.659552	0.493832	0.562671	0.472281	0.67841	0.575345
C05203	1	1	1	0.84961	0.826695	4.24887	0.613883	0.644601	0.508707	0.496265	0.637016	0.56664
C05230	1	1	1	0.803034	0.792536	0.800195	0.874755	0.874859	0.889603	0.915399	0.816553	0.865976
C05239	1	1	1	0.564228	1.04897	0.242587	1.42234	1.56761	1.43463	1.01279	0.804315	0.908554
C05243	1	1	1	0.886264	0.932983	0.958948	0.866719	1.06928	0.833529	0.777633	0.949189	0.863411
C05252	1	1	1	0.822538	0.846886	0.959506	0.775375	0.95548	0.83061	0.688853	0.897321	0.793087
C05270	1	1	1	0.574679	0.427846	0.270842	0.277017	0.209809	0.692581	0.428636	0.623969	0.526302
C05282	1	1	1	1.53145	1.64504	1.88756	0.284046	0.171248	0.214708	0.43265	0.841911	0.637281
C05293	1	1	1	0.521221	0.524534	0.628484	0.630754	0.577658	0.5676	8.01887	0.507703	4.26329
C05315	1	1	1	0.653777	0.584889	0.768901	0.446053	0.458596	0.411124	1.11796	0.722084	0.920024
C05322	1	1	1	1.39012	2.23122	2.77341	1.08342	0.668686	0.677152	2.02451	3.22706	2.62579
C05328	1	1	1	1.88419	1.29104	0.997655	1.65153	2.1244	1.7239	0.411143	0.850582	0.630862
C05332	1	1	1	0.914879	0.87095	0.815993	1.27438	1.27117	1.28004	0.899488	1.03108	0.965285
C05340	1	1	1	0.175958	0.190886	0.208947	0.179938	0.371634	0.337679	1.18477	0.198963	0.691865
C05345	1	1	1	2.68661	3.74071	1.12915	1.28588	1.03696	0.160752	0.429035	1.14572	0.787375
C05349	1	1	1	0.732421	0.545987	0.694751	3.87562	2.71663	2.56808	1.2185	0.5719	0.895202
C05350	1	1	1	0.899012	0.807568	0.830253	0.818926	0.788051	1.12542	0.731814	0.980869	0.856342
C05366	1	1	1	1.21191	1.25555	1.47709	0.72483	0.606049	0.578651	0.600491	0.707948	0.65422
C05377	1	1	1	0.214961	0.2788	0.301037	0.446192	0.220695	0.128492	0.133341	0.157203	0.145272
C05381	1	1	1	0.106959	0.148374	0.189564	0.0967807	0.132935	0.109683	1.1516	0.133814	0.642709
C05382	1	1	1	0.869318	0.792764	0.918349	0.656658	0.698985	0.648837	0.538102	0.700948	0.619525
C05403	1	1	1	0.703178	0.590883	0.764934	0.460991	0.437531	0.436677	0.995623	0.74128	0.868451
C05421	1	1	1	0.623852	0.739657	9.10548	0.78126	0.756414	0.753125	0.646154	0.701198	0.673676
C05427	1	1	1	0.999612	0.720665	1.0638	0.261354	0.190596	0.204145	0.589395	1.42831	1.00885
C05430	1	1	1	0.912005	0.871883	0.833143	0.687781	0.651778	0.659509	5.5703	0.824534	3.19742
C05452	1	1	1	0.75047	0.763201	0.765835	0.799677	0.735633	0.737488	0.758857	0.799667	0.779262
C05464	1	1	1	0.212324	0.353049	0.810342	0.0936188	0.0867889	0.0887931	1.89709	0.268313	1.0827
C05465	1	1	1	1.42471	0.561172	22.3863	0.235037	0.160442	0.179957	0.389107	0.71423	0.551668
C05468	1	1	1	0.0998518	0.317037	0.414868	0.0705519	0.0304507	0.0206141	0.0321184	0.300331	0.166225
C05504	1	1	1	0.651842	0.615708	0.678843	0.347015	0.276906	0.285707	1.02584	0.719069	0.872454
C05513	1	1	1	0.0037499	0.529533	0.0131962	0.253857	0.00234761	0.00201291	0.171706	3.04755	1.60963
C05539	1	1	1	1.13664	1.04666	1.11604	0.999333	1.19998	1.11473	0.682456	1.00862	0.845536
C05554	1	1	1	0.875758	0.704708	0.844607	0.447387	0.325303	0.346372	0.378341	0.981877	0.680109
C05557	1	1	1	0.0206006	0.0250569	0.0288831	0.0272236	0.0241151	0.0301128	0.0483273	0.0390685	0.0436979
C05562	1	1	1	0.922559	0.981466	0.920342	1.08951	1.09459	1.11007	1.23059	0.938601	1.0846
C05594	1	1	1	0.974716	0.821811	1.0713	0.440154	0.482823	0.340557	0.600402	0.988853	0.794627
C05595	1	1	1	0.881182	0.849346	1.16441	0.51681	0.472516	0.41309	0.639206	0.681698	0.660452
C05596	1	1	1	0.836369	0.701055	0.970965	0.417745	0.352975	0.394855	0.599887	0.862183	0.731035
C05601	1	1	1	1.09656	1.13604	1.3365	0.655837	0.548363	0.519491	0.580785	0.659558	0.620171
C05613	1	1	1	3.72418	2.87298	3.01459	0.587639	0.572084	0.491111	0.835255	1.98314	1.4092
C05619	1	1	1	0.822098	0.750118	0.948332	0.423735	0.344747	0.38565	0.585903	0.89388	0.739892
C05635	1	1	1	0.827711	0.788639	1.49914	0.637988	0.650063	0.600784	0.749823	0.603668	0.676746
C05643	1	1	1	0.600156	0.552127	0.637901	0.364567	0.263705	0.300158	1.07773	0.75544	0.916582
C05648	1	1	1	9.74699	29.5061	9.254	0.58918	0.561094	0.559968	0.868207	0.736719	0.802463
C05660	1	1	1	0.403822	0.478389	0.493293	0.362571	0.418105	0.388987	0.309338	0.334841	0.32209
C05670	1	1	1	0.41252	0.414166	0.438288	0.506992	0.434301	0.442631	0.897234	0.441713	0.669474
C05683	1	1	1	3.80074	2.17284	3.21438	0.466556	0.374414	0.192536	1.14538	5.45647	3.30093
C05730	1	1	1	0.978424	1.00919	1.00903	0.8479	0.679215	0.741163	0.870558	0.986283	0.92842
C05771	1	1	1	0.948715	0.823636	1.15631	0.762672	0.780945	0.641599	0.485575	0.525052	0.505313
C05775	1	1	1	52.8466	56.9192	4.1406	0.841846	1.19368	0.225366	2.5742	0.324617	1.44941
C05786	1	1	1	0.226283	0.19592	1.57941	0.168497	0.175364	0.169533	0.340122	0.181683	0.260902
C05790	1	1	1	0.966962	1.01942	1.00759	1.00086	0.91766	0.912759	0.509423	0.941913	0.725668
C05819	1	1	1	1.33162	0.306562	0.935056	0.703958	0.62226	0.802041	0.271153	0.418475	0.344814
C05844	1	1	1	0.0853657	0.0859038	0.362526	0.11307	0.100631	0.0970801	3.0471	0.084701	1.5659
C05849	1	1	1	0.742238	0.58711	0.886992	0.309862	0.228624	0.220578	0.490247	0.639519	0.564883
C05851	1	1	1	0.892493	1.02342	9.18874	0.488942	0.467988	0.326042	0.178118	0.756788	0.467453
C05853	1	1	1	0.200575	0.190573	0.20777	0.16971	0.149129	0.138345	0.156646	1.40601	0.781329
C05909	1	1	1	0.822538	0.846886	0.959506	0.775375	0.95548	0.83061	0.688853	0.897321	0.793087
C05913	1	1	1	0.750319	0.626802	0.794098	0.437636	0.42794	0.42464	0.675211	0.701942	0.688576
C05942	1	1	1	0.57746	0.689069	0.805079	0.708433	1.21274	1.38379	0.916246	0.643088	0.779667
C05944	1	1	1	0.478764	0.59711	0.349895	0.825099	0.866758	1.04777	0.892378	0.802455	0.847417
C05945	1	1	1	0.879507	0.865258	0.851245	0.908807	0.953234	0.947536	0.853939	0.903376	0.878658
C06002	1	1	1	0.549515	0.611153	0.419195	0.261044	0.245796	0.269367	0.90792	0.997731	0.952826
C06044	1	1	1	1.23734	1.2786	3.51073	0.866234	0.635833	0.722883	1.37992	1.2127	1.29631
C06055	1	1	1	1.37936	0.479465	1.35084	0.973784	1.25133	1.21718	1.05892	1.9355	1.49721
C06080	1	1	1	0.684843	0.578146	0.607559	0.404674	0.295529	0.286287	0.137253	0.58815	0.362701
C06082	1	1	1	0.969677	0.732185	0.841557	0.521395	0.379115	0.40367	0.418549	0.872281	0.645415
C06087	1	1	1	0.141314	0.145346	0.199721	0.101539	0.0967004	0.0981622	0.122843	0.265459	0.194151
C06145	1	1	1	0.347932	0.435024	0.332275	0.313515	0.249029	0.285475	0.694681	0.684367	0.689524
C06157	1	1	1	0.0292152	0.0778468	0.200307	0.0163117	0.0144453	0.0149264	0.0323675	0.0512136	0.0417906
C06173	1	1	1	0.63539	0.654667	0.877388	0.50812	0.516063	0.411266	1.21632	0.891527	1.05392
C06178	1	1	1	1.20967	0.938536	1.4633	0.236232	0.1764	0.164074	1.01428	0.868951	0.941616
C06195	1	1	1	2.07522	0.657169	0.684648	0.942364	1.00354	0.602486	0.817553	0.705234	0.761393
C06255	1	1	1	0.904034	0.915134	0.83955	0.820177	0.766522	0.760642	0.703603	1.01255	0.858077
C06307	1	1	1	4.1732	3.91871	2.76335	1.81362	0.433456	1.60899	2.28087	3.70641	2.99364
C06323	1	1	1	0.886595	1.42815	4.5184	0.580775	2.20945	1.21955	0.311635	0.66021	0.485923
C06355	1	1	1	0.671829	0.652927	0.815411	0.660372	0.65203	0.64491	1.11127	0.666598	0.888936
C06356	1	1	1	0.193727	0.160701	0.207767	0.088045	0.0813036	0.0814704	2.68912	0.244812	1.46696
C06368	1	1	1	1.1229	0.538056	3.04866	1.17972	0.632992	1.00683	0.594882	4.26523	2.43005
C06385	1	1	1	0.626481	0.649053	2.65145	0.411276	0.38896	0.384237	0.522305	0.785468	0.653886
C06386	1	1	1	4.51039	1.08944	1.40377	0.659993	0.531063	0.411887	0.637345	0.679714	0.658529
C06391	1	1	1	0.416768	0.403217	0.508607	0.404292	0.378143	0.394895	0.459219	0.625559	0.542389
C06448	1	1	1	0.695763	0.658606	0.697125	0.495515	0.429623	0.433655	0.747609	0.739691	0.74365
C06462	1	1	1	0.202884	0.216086	0.704219	0.182689	0.200154	0.187361	0.396755	1.20819	0.802475
C06469	1	1	1	1.22245	0.98771	3.39769	3.14496	2.83308	1.31274	0.653177	0.677847	0.665512
C06475	1	1	1	0.454945	2.32498	3.13149	0.637508	1.05872	0.285601	1.44485	6.01204	3.72845
C06499	1	1	1	0.0198966	0.020454	0.0197709	0.0216333	0.0221454	0.0222589	0.212977	0.87122	0.542099
C06523	1	1	1	20.4463	17.7941	1.66958	1.36433	1.20978	0.647986	0.879924	6.99184	3.93588
C06533	1	1	1	0.834255	0.826867	0.828981	0.863538	0.928545	0.93015	0.831994	0.870293	0.851144
C06536	1	1	1	1.38731	1.21862	1.1552	0.814351	0.638243	0.548639	1.00253	1.22449	1.11351
C06537	1	1	1	0.585191	0.585003	0.646018	0.586562	1.40875	0.572929	0.595137	0.63718	0.616158
C06539	1	1	1	0.802798	0.792302	0.796405	0.861529	0.858374	0.879316	0.888291	0.811077	0.849684
C06551	1	1	1	0.879604	0.865804	1.27396	0.521258	0.484155	0.41235	0.638062	0.724603	0.681332
C06559	1	1	1	1.28847	0.948135	19.8036	0.240507	0.114819	0.0889274	0.552307	0.817878	0.685092
C06562	1	1	1	1.4733	1.64647	193.351	0.567564	0.561508	0.539424	0.845413	0.737863	0.791638
C06574	1	1	1	1.10136	2.70084	22.1921	0.667641	0.713671	0.649231	0.671462	0.719223	0.695343
C06575	1	1	1	2.0985	1.93357	2.35409	2.23346	2.16881	1.7189	0.359996	2.06342	1.21171
C06605	1	1	1	0.0780195	0.0766662	0.076136	0.0790423	0.0821181	0.0816272	0.712359	0.193061	0.45271
C06627	1	1	1	0.935629	0.814134	1.09032	0.579524	0.513216	0.530306	0.737816	0.670953	0.704385
C06635	1	1	1	0.801439	0.829387	0.819737	0.778799	0.778069	0.761827	0.76445	0.810493	0.787471
C06665	1	1	1	0.0831117	0.100619	0.140195	0.0996478	0.0874324	0.0900829	0.0923449	0.0750441	0.0836945
C06668	1	1	1	0.692879	0.657292	0.65986	0.523668	0.513999	0.479127	0.757	0.739394	0.748197
C06678	1	1	1	0.579894	0.500469	0.537315	0.445285	0.433212	0.432265	0.413601	0.508468	0.461035
C06691	1	1	1	1.29031	1.22039	1.49537	1.07692	1.08772	0.987123	0.827439	0.915134	0.871287
C06693	1	1	1	4.93273	3.0353	5.96276	0.667936	1.13486	0.574541	0.724613	2.1849	1.45476
C06694	1	1	1	0.183779	0.413987	0.709794	1.50237	1.4653	1.48284	0.124791	0.0593207	0.092056
C06722	1	1	1	0.540548	0.524093	3.61914	0.568963	0.551428	0.558621	1.10396	2.59949	1.85173
C06725	1	1	1	0.606269	0.565136	0.723379	0.571061	0.728594	0.642591	0.494384	0.612135	0.55326
C06734	1	1	1	0.7056	0.722288	0.83547	0.836896	1.14053	0.732043	0.67761	1.10548	0.891544
C06742	1	1	1	0.494235	0.477301	1.077	0.518165	0.492991	0.508746	0.925085	2.38554	1.65531
C06748	1	1	1	0.675502	0.723573	0.727288	0.708561	0.755614	0.812716	0.709782	0.679692	0.694737
C06756	1	1	1	3.4668	3.94072	4.62423	1.71959	1.44371	1.77887	4.42167	4.36878	4.39522
C06771	1	1	1	3.90045	1.56043	12.4731	0.0225671	0.0921669	0.00797799	0.616739	0.626908	0.621823
C06772	1	1	1	0.679196	4.38845	2.26044	0.655691	3.5531	3.06842	0.839911	0.727132	0.783521
C06773	1	1	1	3.42609	3.79549	0.850847	9.60553	9.06052	2.90677	0.347049	1.05273	0.699892
C06804	1	1	1	0.293238	0.304408	0.380646	0.316239	0.306231	0.286591	1.82655	0.336039	1.08129
C06805	1	1	1	0.214734	0.371005	0.465992	0.317404	0.30546	0.565643	0.574603	0.741342	0.657973
C06807	1	1	1	7.4112	87.049	65.1354	10.8296	4.46679	5.30621	2.01689	4.41002	3.21345
C06812	1	1	1	0.63479	0.643476	0.75589	0.652111	0.648634	0.649402	1.51801	0.637658	1.07783
C06817	1	1	1	0.845949	0.875298	0.784221	0.935783	0.921297	0.948061	0.939415	0.89563	0.917522
C06819	1	1	1	4.8127	8.87546	23.6566	0.222161	0.375726	0.176923	0.285824	0.242007	0.263916
C06820	1	1	1	0.23681	0.193225	0.250223	0.104415	0.0967976	0.099033	2.11586	0.246448	1.18116
C06827	1	1	1	0.895937	0.89079	3.3093	0.719434	0.661165	0.630568	0.659913	0.739083	0.699498
C06837	1	1	1	0.810457	1.00967	0.799275	0.771243	0.768883	0.752264	0.786873	0.790044	0.788459
C06861	1	1	1	0.550831	0.54755	5.12281	0.489907	0.463303	0.439705	1.28951	0.572018	0.930763
C06869	1	1	1	5.20037	12.0966	7.78567	6.32077	9.58293	5.29039	69.9815	5.60633	37.7939
C06878	1	1	1	0.914554	3.53998	3.91018	0.977931	1.03065	1.03827	4.21288	4.05164	4.13226
C06913	1	1	1	0.780831	0.753951	1.67462	0.685085	0.68735	0.691423	0.729221	0.729315	0.729268
C06918	1	1	1	1.30188	1.23132	1.50877	1.08657	1.09746	0.994815	0.834854	0.923335	0.879094
C06924	1	1	1	13.136	7.94211	12.1506	0.478398	0.455593	0.454679	1.07603	0.654917	0.865472
C06936	1	1	1	3.18311	1.71949	3.57871	1.30064	0.917651	1.28305	0.759619	4.04566	2.40264
C06948	1	1	1	1.25454	0.915153	0.533375	1.29422	0.69877	1.01657	0.606242	0.827582	0.716912
C06956	1	1	1	0.925399	0.969691	0.891142	1.35389	1.42917	1.27481	0.352749	1.02858	0.690664
C06958	1	1	1	0.890204	0.869212	0.8449	2.18192	1.41255	0.92557	0.368925	0.837426	0.603175
C06967	1	1	1	0.591375	0.630104	1.40667	0.564815	0.602655	0.614733	1.0102	0.651058	0.830629
C06971	1	1	1	0.689226	0.695089	0.692164	0.631262	0.59693	0.655124	0.885543	0.717832	0.801688
C06996	1	1	1	0.802844	0.838694	0.774589	0.887048	0.88274	0.912703	0.878262	0.831556	0.854909
C07002	1	1	1	1.2622	0.14804	1.09051	0.0452792	0.0462948	0.0455596	0.0970032	0.282809	0.189906
C07007	1	1	1	1.02136	1.07139	1.02637	0.891206	0.916002	1.00256	0.718111	0.968445	0.843278
C07020	1	1	1	0.401047	0.383782	0.399926	0.258396	0.284282	0.297284	0.366389	0.399838	0.383113
C07023	1	1	1	0.806568	0.616152	1.10549	1.28052	0.987649	0.528896	0.391287	1.26503	0.82816
C07040	1	1	1	0.513969	0.546798	0.518777	0.632316	0.611658	0.364177	0.409555	0.513868	0.461711
C07045	1	1	1	1.03534	1.0392	12.0838	1.00022	1.12933	1.03513	0.611534	1.04199	0.826763
C07073	1	1	1	0.586568	0.624982	0.659328	0.560224	0.597756	0.609736	1.00199	0.645766	0.823877
C07078	1	1	1	1.06305	1.06084	2.7156	0.9728	1.07021	0.923792	0.602894	0.973082	0.787988
C07079	1	1	1	2.49155	5.48328	2.68204	8.52752	11.5289	3.02474	1.43771	1.1442	1.29096
C07100	1	1	1	0.191269	0.330465	0.314106	0.282721	0.272082	0.503834	0.67524	0.660333	0.667787
C07113	1	1	1	0.313911	0.319839	0.32352	0.341408	0.364731	0.366933	1.6419	0.329665	0.985784
C07115	1	1	1	0.923656	0.898026	1.24161	0.685326	0.551447	0.427696	0.661809	0.665547	0.663678
C07122	1	1	1	1.12476	1.45879	1.65444	0.842161	0.704153	0.672319	0.697695	0.822546	0.760121
C07124	1	1	1	1.18865	0.740792	1.37868	0.305516	0.243438	0.274475	0.0343745	1.08983	0.562103
C07125	1	1	1	1.03065	1.32257	1.20252	0.631396	0.567019	0.597591	0.722606	1.04431	0.88346
C07127	1	1	1	0.284283	0.310408	0.336583	0.292788	0.319297	0.286494	1.91267	0.321862	1.11727
C07130	1	1	1	0.637723	0.640106	2.42558	0.616091	0.721738	0.637593	0.411293	0.897446	0.65437
C07148	1	1	1	0.117529	2.09904	0.647232	0.114456	2.11898	0.11893	0.960145	0.377418	0.668781
C07153	1	1	1	0.56245	0.568059	0.599418	0.546132	0.551509	0.696839	4.26587	0.520997	2.39344
C07165	1	1	1	1.10684	0.548463	0.895746	0.527887	1.15389	0.900103	2.57511	0.560058	1.56758
C07172	1	1	1	0.621229	0.649053	1.21732	0.456677	0.38896	0.384237	0.512422	0.785468	0.648945
C07175	1	1	1	0.24651	0.22264	0.231149	0.169958	0.2251	0.182109	0.133232	0.169797	0.151514
C07178	1	1	1	0.255598	0.241644	1.35927	0.189377	0.190623	0.192287	2.95419	0.236905	1.59555
C07180	1	1	1	0.733339	0.684492	0.741822	0.630237	0.626258	0.598719	0.742139	0.742415	0.742277
C07182	1	1	1	1.03643	0.86321	0.87708	0.241871	0.167971	0.16763	0.67834	0.757687	0.718014
C07184	1	1	1	0.817039	0.831997	0.878665	0.857425	0.915043	0.898331	0.926773	0.836856	0.881814
C07192	1	1	1	1.04577	1.52786	1.46452	1.09826	2.31949	1.32031	0.648696	0.453858	0.551277
C07198	1	1	1	0.409791	0.779581	4.02378	3.81823	3.51982	0.750161	0.179574	0.646947	0.41326
C07199	1	1	1	0.647499	1.36108	0.488948	0.284527	0.25506	0.530144	0.602849	1.97909	1.29097
C07241	1	1	1	1.38482	0.669784	0.85361	0.805252	0.366606	0.161251	0.173653	1.08542	0.629538
C07250	1	1	1	1.48891	1.29217	1.38157	0.771894	0.465109	0.542994	1.46613	1.59997	1.53305
C07254	1	1	1	2.49899	3.29318	3.1092	3.89182	6.9666	5.56573	0.202676	1.45947	0.831075
C07263	1	1	1	0.00852154	0.0281912	0.0267868	0.00527249	0.00493898	0.00478603	0.177965	0.52124	0.349603
C07267	1	1	1	0.886638	0.85353	0.891347	0.868153	0.895144	0.908633	0.897711	0.858921	0.878316
C07272	1	1	1	2.53438	1.96461	1.55648	0.623872	0.472663	0.412769	0.464708	1.99957	1.23214
C07273	1	1	1	0.452594	1.43466	0.655505	1.57987	1.3222	2.19444	0.32831	0.365563	0.346937
C07280	1	1	1	0.391203	0.403375	0.407819	0.397585	0.407809	0.440723	1.91981	0.407739	1.16377
C07287	1	1	1	0.820102	0.89713	0.69693	0.708319	0.70429	0.727429	0.750314	1.00158	0.875949
C07289	1	1	1	0.810957	0.736436	0.816213	0.705893	0.701436	0.594746	9.05107	0.83113	4.9411
C07308	1	1	1	4.5531	4.51223	3.97541	7.4945	15.8216	10.5586	2.46075	1.66015	2.06045
C07309	1	1	1	0.356171	0.3342	0.680148	0.211767	0.206097	0.20004	1.13347	1.86881	1.50114
C07310	1	1	1	0.294207	0.70944	1.20466	1.43408	1.07766	1.13988	2.02258	0.320438	1.17151
C07317	1	1	1	0.491522	0.401059	0.427985	0.217101	0.192393	0.187633	1.43709	0.483383	0.960235
C07318	1	1	1	0.916037	1.00341	11.0349	0.885152	1.09387	0.963515	0.799979	0.863922	0.83195
C07321	1	1	1	0.884975	2.16106	1.11356	0.643109	4.02059	1.13479	1.26448	2.42268	1.84358
C07327	1	1	1	3.45	4.25273	1.89404	4.91198	4.319	5.6091	0.831816	0.548648	0.690232
C07332	1	1	1	1.36701	1.21742	1.40552	0.715551	0.645894	0.58801	2.14614	1.50466	1.8254
C07339	1	1	1	4.16857	0.969784	1.423	0.561849	0.252394	0.236875	0.256743	0.988997	0.62287
C07354	1	1	1	0.701724	0.574506	1.54974	0.477128	0.305128	0.392438	0.406903	0.765801	0.586352
C07356	1	1	1	0.827303	0.798005	1.23758	0.621957	0.556299	0.564404	0.718877	0.622087	0.670482
C07366	1	1	1	0.723169	0.746016	0.843702	0.779808	0.867371	0.781308	1.27675	0.724752	1.00075
C07369	1	1	1	0.853024	0.592637	0.923153	0.335226	0.303145	0.319966	0.141052	0.898904	0.519978
C07370	1	1	1	1.35655	0.984052	1.13797	0.445358	0.230792	0.106218	0.0841192	1.83022	0.95717
C07373	1	1	1	0.830681	0.681299	0.755565	0.368679	0.29745	0.28594	0.27961	0.820649	0.550129
C07402	1	1	1	2.40153	1.87043	2.19362	0.529021	0.294316	0.347283	1.22585	2.75702	1.99144
C07404	1	1	1	1.76487	0.511533	0.588372	1.47222	3.80281	2.57009	1.6613	0.562467	1.11188
C07415	1	1	1	0.925996	0.892541	1.10101	0.543093	0.475783	0.434098	0.671714	0.660774	0.666244
C07422	1	1	1	0.582987	0.294797	0.321876	0.0640702	0.0678605	0.0610434	0.498782	0.5464	0.522591
C07425	1	1	1	0.448892	2.08567	1.48404	2.20972	1.97811	1.65667	3.88271	0.54953	2.21612
C07427	1	1	1	0.722664	0.743142	0.789205	0.675263	0.65986	0.675242	0.730396	0.740209	0.735303
C07445	1	1	1	0.923656	0.898026	1.24161	0.685326	0.551447	0.427696	0.661809	0.665547	0.663678
C07454	1	1	1	0.924135	0.98178	0.97752	0.822486	0.718679	0.744001	0.423528	0.976649	0.700089
C07460	1	1	1	0.93096	0.907794	1.50949	2.99991	1.12028	3.36315	0.687482	0.702426	0.694954
C07461	1	1	1	0.582024	0.493223	0.520193	0.420448	0.409049	0.408155	0.391509	0.496114	0.443812
C07463	1	1	1	0.799388	6.57299	7.08131	0.504238	0.892893	0.934127	0.582602	0.49101	0.536806
C07466	1	1	1	0.740399	0.675503	0.980787	1.79407	2.33826	2.64044	0.561959	0.744083	0.653021
C07467	1	1	1	1.55999	1.24734	1.33597	0.319146	0.305664	0.312499	2.11401	0.604186	1.3591
C07469	1	1	1	0.289507	0.316112	0.3307	0.269636	0.32294	0.291758	1.94781	0.327777	1.1378
C07481	1	1	1	0.722561	1.50054	1.18375	0.0301213	0.170862	0.557193	0.31214	0.167305	0.239723
C07482	1	1	1	0.952083	0.741932	0.873926	0.316834	0.220726	0.236462	0.644666	0.967576	0.806121
C07497	1	1	1	0.795016	0.767451	1.03704	0.56989	0.647756	0.563102	0.626932	0.608328	0.61763
C07498	1	1	1	0.73404	0.745722	0.776692	0.685893	0.63491	0.685871	0.699433	0.710593	0.705013
C07499	1	1	1	0.298068	0.334718	0.491576	1.4529	0.751355	0.703082	2.04912	0.320713	1.18492
C07501	1	1	1	1.11992	0.69568	0.891283	2.27051	1.31854	2.81312	1.38384	0.751335	1.06759
C07505	1	1	1	1.3381	1.57059	1.36611	0.731578	0.777717	0.468383	0.531128	0.818765	0.674946
C07518	1	1	1	0.923656	0.898026	1.24161	0.685326	0.551447	0.427696	0.661809	0.665547	0.663678
C07519	1	1	1	0.94285	0.9911	1.00538	0.921134	0.997264	0.914958	0.791106	0.895681	0.843394
C07523	1	1	1	1.66102	1.5549	2.10504	11.1887	1.30378	1.37248	18.1578	2.18183	10.1698
C07544	1	1	1	0.0308263	0.0284442	0.0344979	0.0202092	0.0200449	0.0191883	0.0467587	0.0894271	0.0680929
C07545	1	1	1	0.746788	0.937124	0.69007	1.60488	1.57745	1.54455	1.09543	1.05338	1.0744
C07546	1	1	1	1.06611	1.08104	1.06333	0.959264	0.830889	1.36033	1.01337	1.04157	1.02747
C07550	1	1	1	1.19555	2.71985	4.16747	0.0702419	0.0661112	0.0652594	0.426215	0.100057	0.263136
C07565	1	1	1	0.22426	0.148192	0.177522	0.120301	0.0960579	0.119778	0.0892847	0.889159	0.489222
C07567	1	1	1	0.524581	0.130127	0.416116	0.0555447	0.0585478	0.0537297	0.439885	0.597932	0.518908
C07569	1	1	1	0.550481	0.613508	0.658625	0.779116	0.696671	0.743554	0.548254	0.628915	0.588585
C07580	1	1	1	0.356903	0.328758	0.365552	0.342548	0.240877	0.248577	1.68159	0.407624	1.04461
C07592	1	1	1	1.78824	0.92572	1.62789	1.89285	3.11239	1.72212	0.616536	3.42663	2.02158
C07593	1	1	1	0.934987	1.17836	5.95075	0.908518	1.0765	0.725294	0.743506	0.783033	0.763269
C07641	1	1	1	2.73551	3.039	1.26043	1.976	0.714247	0.725948	0.99504	0.734473	0.864756
C07650	1	1	1	0.704337	0.67665	0.81281	0.678979	0.641082	0.627056	0.661679	0.720486	0.691082
C07653	1	1	1	0.280539	0.817073	0.101765	0.2105	0.227665	0.31127	1.9426	0.899804	1.4212
C07661	1	1	1	0.65762	0.588327	0.732016	1.5433	2.31328	0.830659	0.798183	0.781535	0.789859
C07662	1	1	1	0.883216	0.803118	0.94951	0.343464	0.228449	0.274456	0.578816	0.863424	0.72112
C07670	1	1	1	0.922934	0.085615	0.971929	0.916217	0.022695	0.0232406	0.134216	0.0278223	0.0810193
C07704	1	1	1	0.701724	0.574506	0.686957	0.455177	0.305128	0.392438	0.406903	0.765801	0.586352
C07706	1	1	1	0.2765	0.26581	0.345599	0.233677	0.322752	0.284975	0.428539	0.757069	0.592804
C07708	1	1	1	0.5214	0.53165	0.593701	0.52686	0.524454	0.494962	0.794993	0.653066	0.724029
C07734	1	1	1	1.29005	4.31374	0.884481	0.522282	0.527842	0.438961	0.598526	0.549564	0.574045
C07756	1	1	1	0.610251	0.649779	0.691529	0.765171	0.83466	0.730245	0.597683	0.617658	0.607671
C07777	1	1	1	0.618023	0.621694	0.730302	0.631048	0.632743	0.62742	1.95116	0.616072	1.28362
C07792	1	1	1	0.520251	0.488892	0.69007	0.563227	1.54028	0.469156	1.09543	0.627185	0.861306
C07805	1	1	1	0.646736	0.588916	0.61853	0.529013	0.554547	0.538022	0.475823	0.604676	0.540249
C07809	1	1	1	0.369725	0.304467	0.354627	0.20815	0.126953	0.16634	2.15742	0.821541	1.48948
C07817	1	1	1	0.68203	0.682287	0.711931	0.654839	0.67324	0.653515	0.727207	0.665636	0.696421
C07819	1	1	1	0.521096	0.490885	0.691191	0.445039	0.425363	0.408095	1.09721	0.628203	0.862704
C07844	1	1	1	0.709559	0.540643	0.799507	0.450299	0.415234	0.412089	0.627986	0.766555	0.69727
C07846	1	1	1	0.794096	0.610879	0.84397	0.344455	0.26033	0.242801	0.497419	0.739013	0.618216
C07852	1	1	1	0.102038	0.0956663	0.106183	0.0811429	0.0675717	0.0890147	0.0374599	0.0837793	0.0606196
C07871	1	1	1	0.0752035	0.152538	0.529327	0.612381	0.456855	0.299054	0.132779	2.91641	1.5246
C07872	1	1	1	3.00709	5.27437	3.65136	1.57763	0.350232	1.32251	0.833125	0.605046	0.719085
C07875	1	1	1	0.824389	0.780043	1.17703	0.821689	0.859758	0.839619	0.669174	0.70651	0.687842
C07890	1	1	1	0.508218	0.439851	0.493394	0.862792	0.439029	0.780046	0.48095	0.450467	0.465709
C07905	1	1	1	0.829897	0.847109	0.931159	0.876016	0.936076	0.869585	0.97113	0.830678	0.900904
C07908	1	1	1	0.675102	0.663598	0.762008	0.700741	0.680618	0.65546	0.718683	0.715754	0.717218
C07919	1	1	1	1.35532	1.29698	1.35153	0.54356	0.327331	0.390661	0.912516	1.229	1.07076
C07927	1	1	1	0.737157	2.60055	1.35577	1.2488	0.761533	2.54082	1.44211	1.45501	1.44856
C07956	1	1	1	0.658994	0.639503	0.651454	0.428643	0.45474	0.414776	0.740967	0.663956	0.702461
C07965	1	1	1	2.99159	2.48699	2.62079	0.703298	0.402412	0.483862	2.04518	3.31419	2.67969
C07966	1	1	1	1.49003	1.26062	2.71672	0.917116	0.816222	0.78742	5.14497	2.0593	3.60214
C07967	1	1	1	0.634671	0.64366	0.676233	0.619789	0.963088	1.66497	0.836012	0.624795	0.730404
C07971	1	1	1	0.875011	0.733694	1.02371	0.260128	0.20689	0.200048	0.585973	1.41437	1.00017
C07973	1	1	1	0.884553	0.080862	0.806616	1.55109	1.77345	0.0599964	0.190224	0.615291	0.402757
C07997	1	1	1	1.20225	1.28089	0.6003	0.925191	0.859461	1.13021	0.463645	0.577848	0.520747
C08005	1	1	1	0.621972	0.249883	0.712599	0.125764	0.136205	0.126139	0.834462	0.36325	0.598856
C08021	1	1	1	0.843388	0.307423	0.6735	0.709147	0.770132	0.767814	0.88304	1.08634	0.984689
C08022	1	1	1	1.49119	1.51981	1.65252	1.19399	0.98492	1.00937	2.14567	1.82549	1.98558
C08057	1	1	1	1.36011	1.03033	1.29773	1.23469	1.37842	1.15096	1.35242	1.28941	1.32092
C08092	1	1	1	0.10745	0.0989768	0.126267	0.0756676	0.072519	0.0697277	0.589067	0.431355	0.510211
C08095	1	1	1	0.777674	0.628373	0.859581	0.469584	0.443541	0.450617	0.685998	0.816725	0.751362
C08117	1	1	1	0.763774	0.77585	1.16893	0.829281	0.821408	0.847376	0.675357	0.713037	0.694197
C08141	1	1	1	1.1398	1.52246	0.713419	1.7834	0.669794	0.651342	0.754365	1.1216	0.937983
C08148	1	1	1	135.225	103.669	110.239	48.2722	22.3188	21.2503	2.03202	204.05	103.041
C08157	1	1	1	0.789456	0.751389	1.10185	0.563447	0.501653	0.512672	0.665632	0.856585	0.761108
C08175	1	1	1	1.07641	0.298763	1.11084	0.318501	0.2563	0.248863	0.333617	0.912734	0.623176
C08183	1	1	1	1.15122	1.23332	0.813584	0.891629	0.496383	0.155946	0.235399	0.59881	0.417104
C08185	1	1	1	0.924644	0.879195	71.3455	0.919654	0.927497	0.897087	0.873405	0.898806	0.886105
C08186	1	1	1	1.05741	1.17702	1.20056	1.0521	0.923028	1.0102	1.0858	0.981943	1.03387
C08211	1	1	1	0.154093	0.178171	0.314252	0.201775	0.039696	0.0425689	0.0594259	0.129803	0.0946143
C08233	1	1	1	0.892597	0.885481	1.15281	0.91007	1.06092	1.02406	0.787873	0.975527	0.8817
C08234	1	1	1	0.668262	0.651252	0.684407	0.576249	0.583329	0.551859	0.855499	0.642627	0.749063
C08257	1	1	1	0.71977	0.654881	0.752402	0.728166	0.693229	0.684002	0.757728	0.715687	0.736708
C08261	1	1	1	1.05052	1.17663	0.948049	1.5782	1.02823	1.58328	0.190075	0.68281	0.436442
C08262	1	1	1	1.63985	7.25692	2.41097	0.162203	10.2353	0.369854	0.287099	0.282137	0.284618
C08272	1	1	1	1.33211	1.27227	1.51197	0.993481	1.03592	0.982403	0.854213	0.915711	0.884962
C08277	1	1	1	0.509174	1.79421	0.551284	0.648155	1.03463	1.17027	0.540807	0.56989	0.555348
C08278	1	1	1	0.652829	0.724245	0.803521	0.562867	0.592328	0.584634	1.02947	2.05332	1.54139
C08280	1	1	1	2.25335	0.513719	0.914493	0.446195	0.45982	0.44453	1.18309	0.849877	1.01648
C08292	1	1	1	1.71007	2.63531	1.01083	0.825791	0.606319	0.729824	1.89202	12.8182	7.35513
C08303	1	1	1	0.196054	0.203786	0.240163	0.21116	0.185523	0.270633	0.358193	0.54794	0.453066
C08306	1	1	1	0.697764	0.755701	0.694073	0.9937	1.02554	1.05755	0.712536	0.739208	0.725872
C08311	1	1	1	1.97279	0.628168	0.275078	0.203971	0.980408	1.05831	0.30095	0.243447	0.272199
C08313	1	1	1	0.765868	0.749525	5.50571	0.627033	0.629043	0.562207	0.677763	0.685398	0.681581
C08322	1	1	1	1.93821	3.94348	4.79729	2.80172	1.4526	2.24011	0.580154	3.56389	2.07202
C08325	1	1	1	0.666443	0.649214	0.771843	0.662627	0.643647	0.649798	1.17076	0.644925	0.907842
C08338	1	1	1	1.07055	0.948978	0.940586	0.720181	0.52651	0.597394	0.676791	1.05137	0.86408
C08357	1	1	1	0.598658	0.123602	0.239152	0.355405	0.139664	0.294654	1.00658	0.231737	0.619161
C08362	1	1	1	0.543213	0.471183	2.06803	0.205295	0.528779	0.589717	0.556307	0.524983	0.540645
C08363	1	1	1	0.70981	0.546595	5.31709	0.279682	0.21086	0.205356	0.505495	0.605882	0.555689
C08369	1	1	1	0.673525	0.773015	0.565123	0.854588	4.5197	0.81715	1.11082	0.657193	0.884006
C08370	1	1	1	0.0773309	0.410632	0.0572442	0.422442	0.0590981	0.054495	0.0290464	0.0749027	0.0519746
C08401	1	1	1	0.045639	0.0428515	0.0431924	0.0462886	0.0458083	0.0465089	0.0433129	0.451043	0.247178
C08402	1	1	1	0.939818	0.992927	1.63441	0.914034	0.634432	0.627196	0.668395	0.739868	0.704131
C08415	1	1	1	0.47065	0.483544	0.475676	0.498531	0.511661	0.509744	0.482422	0.485808	0.484115
C08430	1	1	1	1.07874	0.993769	3.53889	0.970808	1.11404	0.980581	0.78809	0.934107	0.861099
C08433	1	1	1	0.75523	0.519644	0.619312	0.266372	0.128488	0.0613219	0.0603034	1.35561	0.707956
C08437	1	1	1	0.635587	0.533223	0.759326	0.46329	0.4365	0.427011	1.09543	0.749989	0.922708
C08441	1	1	1	0.920405	0.823379	0.909736	0.79162	0.711026	0.747065	0.6525	0.883476	0.767988
C08449	1	1	1	0.264798	0.248151	0.275608	0.191667	0.176762	0.165633	0.214196	0.306231	0.260213
C08451	1	1	1	1.32848	2.31158	0.573763	0.249212	0.162311	0.395449	0.0994814	0.410204	0.254843
C08456	1	1	1	1.53105	1.59949	1.49568	1.31107	1.33908	1.33632	1.43994	1.63362	1.53678
C08491	1	1	1	0.31586	0.4618	0.503312	0.122998	0.0401481	0.0927228	0.897512	0.0605407	0.479026
C08497	1	1	1	0.673453	0.737252	0.389572	0.528732	0.542359	0.667993	1.74887	1.13174	1.4403
C08512	1	1	1	1.2739	0.985881	0.933105	0.554011	0.629708	0.547412	0.609464	0.591378	0.600421
C08536	1	1	1	0.657884	2.56763	1.96309	0.472292	1.44484	0.284245	0.0554055	0.587921	0.321663
C08560	1	1	1	0.835551	0.821537	0.812862	0.916854	0.910362	0.940158	0.903715	0.854555	0.879135
C08567	1	1	1	0.712932	0.682355	0.78059	0.838676	0.763829	0.794752	0.767978	0.703759	0.735868
C08570	1	1	1	0.154564	0.20275	0.0704744	0.43638	0.750979	0.787624	0.51691	0.385541	0.451226
C08579	1	1	1	0.826493	0.872358	2.30297	0.861028	0.915286	0.910928	0.869344	0.866267	0.867806
C08580	1	1	1	1.53395	1.19471	1.23906	0.415637	0.250445	0.301034	0.914952	1.76101	1.33798
C08582	1	1	1	3.29522	6.26719	6.16881	60.2232	21.6961	23.4669	2.09022	2.74268	2.41645
C08588	1	1	1	0.750944	0.625588	0.749436	0.350841	0.291601	0.288661	0.125091	0.806436	0.465764
C08592	1	1	1	0.781937	0.632844	0.871807	0.378235	0.256525	0.243457	0.520672	0.752621	0.636647
C08607	1	1	1	0.0909021	0.0756558	0.114257	0.0683936	0.0720592	0.0644793	0.149017	0.234069	0.191543
C08610	1	1	1	0.580932	0.566132	0.646139	0.455808	0.446989	0.444024	0.553493	0.60305	0.578271
C08613	1	1	1	0.631997	0.667704	0.772611	0.791461	0.76629	0.712095	0.680256	0.710353	0.695305
C08617	1	1	1	0.891365	0.960543	0.911881	0.774309	0.653349	0.64824	1.11349	0.810821	0.962157
C08630	1	1	1	0.905084	0.878537	0.708661	0.795644	0.925113	0.656797	0.935396	0.710749	0.823072
C08659	1	1	1	3.12483	2.59775	2.65991	0.73462	0.416373	0.505411	2.03202	3.46179	2.7469
C08661	1	1	1	0.826826	0.842299	9.66026	0.900504	0.906574	0.912319	0.904	0.861865	0.882932
C08668	1	1	1	0.646708	0.562687	4.27366	0.338328	0.25306	0.275506	0.956568	0.702564	0.829566
C08671	1	1	1	1.13608	0.93426	1.06843	1.95362	1.75033	1.91048	0.693152	1.07809	0.885623
C08673	1	1	1	0.849585	0.836784	0.841753	0.878429	0.956139	0.93653	0.876184	0.881095	0.87864
C08675	1	1	1	2.12724	2.16134	6.09531	0.996223	0.763305	0.72402	2.0898	2.27122	2.18051
C08684	1	1	1	0.721203	0.731891	0.886363	0.685826	0.703296	0.697076	1.28379	0.693093	0.988442
C08688	1	1	1	0.68846	0.688929	0.795182	0.597975	0.611388	0.58813	0.977242	0.753786	0.865514
C08692	1	1	1	1.1557	1.10595	1.15247	0.4635	0.279119	0.333121	0.778112	1.04798	0.913047
C08694	1	1	1	0.529833	0.458265	0.701844	0.46187	0.406898	0.423529	1.03199	0.587001	0.809494
C08702	1	1	1	2.50073	1.59999	1.4187	0.781289	0.276354	0.416304	0.506465	3.18007	1.84327
C08706	1	1	1	0.367866	0.379094	0.355735	0.403661	0.405196	0.413921	0.549934	0.376233	0.463083
C08719	1	1	1	0.307523	0.313551	10.7746	0.325737	0.309975	0.285057	1.88141	0.346132	1.11377
C08726	1	1	1	1.05975	0.909209	1.43372	0.769819	0.72047	0.703594	0.687306	0.711215	0.699261
C08737	1	1	1	3.48565	3.28617	1.23557	1.4546	1.53769	1.14448	0.362692	1.02302	0.692854
C08750	1	1	1	0.0837113	0.107572	0.290574	0.220636	0.121575	0.0212215	0.31467	0.0771469	0.195909
C08752	1	1	1	2.64134	2.19582	2.51482	1.26884	0.953488	1.00854	1.83574	2.92617	2.38096
C08756	1	1	1	0.491185	0.520169	0.741348	0.18077	0.132726	0.130508	0.548225	0.467509	0.507867
C08773	1	1	1	2.85761	2.37561	2.72073	1.06284	0.655983	0.664288	1.98605	3.16576	2.5759
C08775	1	1	1	0.782373	0.695456	0.662685	0.421821	0.416752	0.410134	0.777106	0.513818	0.645462
C08776	1	1	1	1.0104	0.931613	1.10104	0.528574	0.482216	0.425608	0.782881	1.05167	0.917277
C08778	1	1	1	0.212236	0.196732	0.250518	0.169658	0.157768	0.15479	2.36541	0.223056	1.29423
C08782	1	1	1	0.95419	0.993769	1.82083	0.871998	1.37954	0.949197	0.78809	0.934107	0.861099
C08794	1	1	1	0.665748	0.632373	0.739914	0.505368	0.468857	0.454202	0.691459	0.670059	0.680759
C08798	1	1	1	0.567368	0.414336	0.583629	0.225419	0.153876	0.172593	0.432984	0.685004	0.558994
C08804	1	1	1	2.85016	2.36941	2.71363	1.01157	0.834439	0.855153	1.98087	3.15751	2.56919
C08807	1	1	1	0.101772	0.116882	0.882746	0.0949939	0.085179	0.0868254	2.99649	0.153642	1.57507
C08809	1	1	1	0.521096	0.489686	0.721237	0.445039	0.425363	0.408095	1.09721	0.628203	0.862704
C08810	1	1	1	3.75943	2.33267	2.54621	1.26559	0.911136	0.44048	0.069906	4.6203	2.3451
C08848	1	1	1	2.02442	1.5817	1.51628	1.69289	0.625649	1.17339	0.775935	1.91157	1.34375
C08849	1	1	1	0.868385	0.818082	0.896627	0.880746	0.921373	0.902477	0.844326	0.909833	0.877079
C08853	1	1	1	0.688742	0.657366	0.849251	0.743219	0.73383	0.725816	1.05919	0.719003	0.889096
C08855	1	1	1	2.42196	2.08396	0.506619	0.123229	0.114239	0.111775	2.01187	0.216561	1.11421
C08858	1	1	1	0.335061	0.407541	0.390549	0.442782	0.392223	0.489774	0.547214	0.564131	0.555672
C08861	1	1	1	0.624494	0.145294	0.314842	2.18359	0.86621	0.881134	0.203937	0.287354	0.245645
C08862	1	1	1	0.660667	0.572973	6.09697	0.418429	0.467905	0.440532	1.16469	0.606789	0.885737
C08878	1	1	1	0.525039	0.580028	0.625839	0.495847	0.497649	0.453795	1.21842	0.652394	0.935406
C08879	1	1	1	0.720278	0.702169	0.700861	0.677894	0.708176	0.674503	0.606873	0.71098	0.658927
C08897	1	1	1	0.352029	0.287495	0.815513	0.708173	0.741558	0.251189	0.612056	0.373976	0.493016
C08898	1	1	1	0.596635	0.676046	0.659667	0.829641	0.806852	0.501214	0.543173	0.624315	0.583744
C08899	1	1	1	0.577613	0.450118	0.530196	0.192218	0.133911	0.143458	0.391108	0.587012	0.48906
C08953	1	1	1	0.249495	0.00974989	0.070074	0.0252949	0.0221137	0.0387922	0.0157676	0.025407	0.0205873
C08954	1	1	1	5.89328	4.26048	2.96197	0.967422	0.272194	0.312507	0.456665	5.75845	3.10756
C08966	1	1	1	0.41704	0.434815	0.429186	0.128491	0.122312	0.118776	0.355909	0.313344	0.334626
C08968	1	1	1	0.736858	0.747727	1.21846	0.744562	0.718514	0.712159	1.31157	0.752231	1.0319
C08972	1	1	1	0.0116994	0.0101225	0.0104888	0.00992944	0.0151793	0.0154777	2.82832	0.0155714	1.42195
C08975	1	1	1	0.117416	0.146954	0.134211	0.117997	0.0997233	0.100538	0.125757	0.122598	0.124178
C08992	1	1	1	0.65061	0.555388	0.795051	1.87501	0.468638	1.23574	0.809425	1.62596	1.21769
C08994	1	1	1	1.10216	1.02625	4.67128	0.922653	0.658657	0.6791	0.678663	0.694544	0.686603
C08996	1	1	1	0.824363	0.855735	0.795247	0.897821	0.903873	0.909601	0.901306	0.859297	0.880302
C08998	1	1	1	3.00454	2.49775	2.55752	0.706343	0.404154	0.485957	2.05404	3.03831	2.54617
C09000	1	1	1	0.0231947	0.218171	0.132179	0.0172098	0.0138479	0.0107403	0.0805588	0.615948	0.348253
C09010	1	1	1	0.807957	0.873899	0.644616	0.311252	0.296415	0.29582	0.458656	0.426098	0.442377
C09016	1	1	1	0.105502	0.200516	0.154402	0.0872679	0.103585	0.0900473	0.11971	0.284376	0.202043
C09018	1	1	1	1.26271	1.28295	1.32247	0.591346	0.42686	0.42977	1.24048	1.34817	1.29432
C09020	1	1	1	0.945349	1.24391	0.348094	0.153929	0.115672	0.122351	0.222702	0.360428	0.291565
C09038	1	1	1	1.13859	2.26575	3.22624	0.886081	0.489167	0.524645	2.05584	3.277	2.66642
C09055	1	1	1	0.952346	0.871783	0.915589	0.741974	0.783593	0.696462	0.749672	0.915417	0.832545
C09056	1	1	1	1.13911	0.832717	0.965709	0.716416	0.533147	0.565619	0.694777	0.973182	0.833979
C09078	1	1	1	0.700097	0.626159	0.747005	0.969606	0.943312	0.872621	0.904727	1.00962	0.957172
C09086	1	1	1	0.84697	0.82499	0.856172	0.734676	0.533079	0.577688	0.72966	0.871418	0.800539
C09106	1	1	1	7.50747	10.2688	11.3949	3.51827	3.90066	1.61774	1.19675	0.997669	1.09721
C09130	1	1	1	0.6579	0.650554	1.27598	0.407059	0.38131	0.369502	0.609795	0.747058	0.678427
C09160	1	1	1	0.693317	0.742437	0.826471	0.628122	1.0929	0.744605	0.907469	0.666506	0.786988
C09162	1	1	1	0.870894	0.817702	0.851014	0.877357	0.874125	0.887493	0.826507	0.891957	0.859232
C09164	1	1	1	1.17445	1.07906	1.13288	0.689402	0.582962	0.535596	0.861471	1.1168	0.989138
C09167	1	1	1	1.3483	0.859309	0.872322	2.61403	1.54767	1.38518	1.24151	1.23993	1.24072
C09180	1	1	1	2.85642	2.37462	2.71959	1.37216	1.91101	1.11164	1.98522	3.16444	2.57483
C09210	1	1	1	0.844737	0.700838	0.980679	0.421924	0.353652	0.398805	0.605888	0.870809	0.738349
C09211	1	1	1	2.01402	2.46802	2.51481	3.4847	4.32819	3.62191	3.81455	0.83146	2.323
C09229	1	1	1	1.42682	2.86729	1.59252	1.74979	1.68862	2.30332	0.89565	1.00741	0.951531
C09241	1	1	1	1.05153	0.894794	1.30014	0.653041	0.652696	0.613484	0.697749	0.680828	0.689289
C09246	1	1	1	0.684975	0.656754	0.815301	0.703404	0.694519	0.686934	1.12257	0.680486	0.901527
C09249	1	1	1	4.39021	1.48801	0.782939	0.712759	0.203314	0.187957	0.0913821	0.203912	0.147647
C09250	1	1	1	0.187137	0.163568	0.211097	0.0986938	0.0925469	0.0910092	2.85655	0.24918	1.55287
C09258	1	1	1	0.872025	0.659811	0.824002	0.33448	0.196295	0.240163	0.584334	0.860479	0.722407
C09264	1	1	1	0.79663	0.76901	0.947788	0.571047	0.599622	0.460728	0.576002	0.576815	0.576409
C09275	1	1	1	7.75409	2.2599	6.12353	0.461997	1.89177	1.95552	0.469507	5.12636	2.79793
C09280	1	1	1	1.07553	1.08895	1.14999	0.947519	1.13547	1.05285	0.724461	0.973546	0.849003
C09281	1	1	1	1.71718	1.82824	2.53753	1.82557	1.88001	0.284071	1.96438	1.44276	1.70357
C09286	1	1	1	0.786762	0.655652	0.760169	0.333174	0.280125	0.282103	0.118628	0.860666	0.489647
C09296	1	1	1	0.792265	0.662075	0.783295	1.15599	0.952081	1.16979	0.118761	0.862569	0.490665
C09311	1	1	1	0.042408	0.144999	0.114396	0.038076	0.0459366	0.0408501	0.0325612	0.0385941	0.0355777
C09313	1	1	1	0.466695	0.450705	0.559237	0.489291	0.474211	0.485716	0.98457	2.25262	1.61859
C09347	1	1	1	0.819391	0.784503	0.999804	0.722361	0.784797	0.68116	0.618158	0.805232	0.711695
C09360	1	1	1	0.845932	0.891381	1.24113	0.891876	0.869758	0.786247	0.647907	0.714727	0.681317
C09362	1	1	1	0.434041	1.1361	3.20148	2.94956	3.52643	3.9291	0.0848492	1.77023	0.92754
C09364	1	1	1	0.997796	1.18204	14.7748	1.06327	1.04345	0.96114	0.802448	0.827353	0.814901
C09382	1	1	1	0.387066	0.414068	0.405955	0.376362	0.410079	0.630336	2.30522	0.415838	1.36053
C09417	1	1	1	0.836558	0.824852	0.911708	0.881956	0.911481	0.906885	4.19013	0.857292	2.52371
C09420	1	1	1	2.85321	2.37194	2.71653	3.40823	1.74522	7.37202	1.98299	3.16088	2.57193
C09421	1	1	1	0.349001	0.288192	0.324137	0.128385	0.0933087	0.0789942	0.252509	0.772872	0.51269
C09441	1	1	1	0.938393	0.897997	0.935772	0.423528	0.252573	0.295534	0.760242	0.880579	0.82041
C09469	1	1	1	1.81884	1.40139	1.38528	2.23225	2.17298	2.49496	0.0793411	1.46429	0.771815
C09478	1	1	1	0.795558	0.638436	0.869833	0.238278	0.188821	0.181517	0.627374	1.02819	0.827782
C09529	1	1	1	1.59819	1.72863	1.53725	0.615675	0.586326	0.585149	0.879045	0.800645	0.839845
C09563	1	1	1	0.250458	0.479259	0.904735	1.37464	14.3617	0.892503	1.5045	0.579345	1.04192
C09570	1	1	1	1.50663	0.919833	1.41684	0.887455	0.259209	0.545452	0.887611	1.96906	1.42834
C09575	1	1	1	0.0232552	0.0213146	0.0219267	0.021291	0.0218126	0.0467699	0.0604722	0.138342	0.0994073
C09591	1	1	1	0.960438	1.21044	1.60352	0.933247	0.780313	0.745036	0.749575	0.804347	0.776961
C09593	1	1	1	0.448905	0.44137	0.452973	0.434066	0.429677	0.399377	0.506746	0.459776	0.483261
C09622	1	1	1	0.824462	0.682201	0.776817	0.345045	0.466204	0.354155	0.323859	0.853377	0.588618
C09627	1	1	1	6.84787	0.658398	0.614088	0.191517	0.123514	0.222089	1.78474	8.76794	5.27634
C09654	1	1	1	0.582024	0.493223	0.520193	0.420448	0.409049	0.408155	0.391509	0.496114	0.443812
C09661	1	1	1	0.783023	0.772275	0.944016	0.769007	0.731317	0.732846	1.26326	0.776926	1.02009
C09675	1	1	1	34.0744	33.073	30.4217	6.12106	1.44381	3.09389	1.90313	37.7789	19.841
C09680	1	1	1	1.08882	1.17768	0.90924	0.429089	0.399454	0.398653	0.624789	0.574218	0.599503
C09707	1	1	1	1.11959	10.3593	9.86261	1.21005	0.592991	0.599805	1.37916	0.82643	1.10279
C09715	1	1	1	0.80307	0.788967	3.06193	3.14825	2.85434	0.676626	0.32081	0.827281	0.574045
C09724	1	1	1	0.0637169	0.0584951	0.0664055	0.0644601	0.0613674	0.0599457	2.67968	0.065558	1.37262
C09766	1	1	1	6.22016	4.62017	0.610889	0.364027	0.0498067	0.0497067	2.90377	0.29991	1.60184
C09780	1	1	1	0.724325	0.557773	0.84267	0.294379	0.222081	0.230803	0.492176	0.622645	0.557411
C09795	1	1	1	0.996011	0.947247	0.995666	1.10617	0.867594	0.923241	0.567579	0.76111	0.664344
C09801	1	1	1	0.928427	0.907704	0.929834	0.905343	0.877968	0.797805	0.531137	0.852362	0.691749
C09808	1	1	1	0.686798	0.636921	0.70445	0.48913	0.452903	0.446949	0.737975	0.730159	0.734067
C09815	1	1	1	0.572792	0.487164	0.831553	0.795255	2.38909	2.93551	0.449855	0.486827	0.468341
C09829	1	1	1	0.627345	0.473399	0.596803	0.389194	0.783665	1.00214	0.43534	0.810435	0.622887
C09866	1	1	1	0.165507	0.342142	0.695917	0.357927	0.120828	0.0900287	0.704659	0.867724	0.786192
C09870	1	1	1	1.6174	1.36356	1.69491	0.533256	0.294387	0.315738	1.23723	1.97214	1.60469
C09874	1	1	1	0.863607	0.838825	0.918162	0.616281	0.572025	0.561231	0.743419	2.08217	1.4128
C09910	1	1	1	0.345992	0.0560705	0.0916936	0.23469	1.00148	0.177248	0.180616	0.428909	0.304762
C09916	1	1	1	0.610655	0.0714496	0.377811	0.0507327	0.0193388	0.0401839	0.0771147	0.226045	0.15158
C09926	1	1	1	1.0302	0.951256	20.2057	0.88499	0.850075	0.780177	0.606047	0.737823	0.671935
C09929	1	1	1	0.846749	0.837489	40.8573	0.910381	0.897966	0.921745	0.840353	0.949383	0.894868
C09930	1	1	1	0.911295	1.04786	0.971712	0.508803	0.450587	0.465592	0.647779	0.599819	0.623799
C09940	1	1	1	1.43287	1.32854	1.39544	0.744692	0.4441	0.519639	1.33674	1.44446	1.3906
C09948	1	1	1	32.134	25.1598	26.9276	8.30687	5.46984	4.27946	1.73379	41.2679	21.5009
C09951	1	1	1	0.937163	0.93997	5.11221	0.956801	1.2311	1.08198	0.844127	0.914709	0.879418
C09953	1	1	1	0.997796	1.22152	60.942	1.06327	1.04345	0.96114	0.802448	0.827353	0.814901
C09954	1	1	1	1.30276	1.23216	1.50979	1.04894	0.999218	0.995487	0.823951	0.923959	0.873955
C09955	1	1	1	0.291137	0.314124	0.314607	0.289814	0.291201	0.283128	0.28327	0.310633	0.296952
C09956	1	1	1	1.12796	1.08853	1.20858	0.963597	1.03754	1.02616	0.812037	0.955381	0.883709
C09978	1	1	1	0.330083	0.18555	0.124975	0.4414	0.263097	0.410466	0.969816	0.125551	0.547683
C09983	1	1	1	2.08514	4.70479	0.882936	0.426325	0.406002	0.405187	0.628226	0.58363	0.605928
C09996	1	1	1	0.880216	0.870109	19.9664	0.915149	0.897877	0.931834	0.889986	0.891667	0.890826
C09999	1	1	1	1.2082	1.11007	1.15828	0.744365	0.614084	0.581156	0.886227	1.1489	1.01756
C10004	1	1	1	2.5907	2.32468	2.06816	0.57531	0.408686	0.491406	1.95945	2.71172	2.33559
C10007	1	1	1	0.862887	0.857678	2.76811	0.918003	0.882928	0.903093	0.865609	0.864006	0.864808
C10009	1	1	1	0.714561	0.756871	0.791987	0.824172	0.797893	0.813064	0.667137	0.685811	0.676474
C10015	1	1	1	1.60567	1.55369	6.61167	2.27421	1.65875	0.53545	1.55527	1.3559	1.45558
C10053	1	1	1	0.790326	0.76901	0.814972	0.571047	0.599622	0.460728	0.480043	0.576815	0.528429
C10072	1	1	1	2.17874	0.614349	0.80163	1.48944	1.33952	2.25459	0.676375	0.632571	0.654473
C10074	1	1	1	0.733398	0.75418	0.813233	0.685293	0.634354	0.685271	0.687393	0.709972	0.698682
C10080	1	1	1	0.745342	0.629106	0.73013	0.368455	0.296041	0.307972	0.129515	0.75841	0.443963
C10094	1	1	1	1.57619	1.24775	1.23589	1.51458	1.52427	1.49947	0.975477	1.24285	1.10917
C10129	1	1	1	2.08008	2.06394	0.254185	0.175286	0.263264	0.163554	0.0678536	0.28123	0.174542
C10138	1	1	1	0.703172	1.19374	0.920466	0.975615	4.8692	0.898744	4.44634	0.778526	2.61243
C10139	1	1	1	0.699624	0.650905	0.797257	0.496681	0.435162	0.439098	0.764688	0.863854	0.814271
C10166	1	1	1	0.818478	0.700838	0.966306	0.421924	0.353652	0.398805	0.598069	0.870809	0.734439
C10172	1	1	1	0.166119	1.71761	1.11288	1.30642	0.102095	0.0946293	1.60044	0.195493	0.897966
C10217	1	1	1	0.968584	1.00876	1.19791	0.875955	1.09387	0.9381	0.799979	0.863922	0.83195
C10280	1	1	1	0.322127	0.293262	17.7697	0.238259	0.247168	0.243829	0.550807	0.266307	0.408557
C10285	1	1	1	0.774003	0.642902	1.13902	0.859472	0.956235	0.621004	1.36806	1.35163	1.35985
C10306	1	1	1	0.69635	0.573311	0.835195	0.328762	1.07281	0.736577	0.628338	0.970968	0.799653
C10313	1	1	1	1.01781	0.978279	1.51443	0.911071	0.839855	0.770797	0.658534	0.728952	0.693743
C10333	1	1	1	3.1815	4.19596	2.59719	0.571047	0.599622	0.473211	0.537159	0.592566	0.564862
C10350	1	1	1	1.58136	1.135	1.12323	0.463923	0.457434	0.436047	1.27327	0.594481	0.933876
C10375	1	1	1	15.0925	21.0703	2.84442	0.499939	1.80902	0.338177	3.45057	0.487109	1.96884
C10387	1	1	1	0.793914	7.29421	9.82231	0.212723	0.0864398	0.0372615	0.0659151	0.313493	0.189704
C10391	1	1	1	0.320263	0.322979	0.335699	0.303819	0.295961	0.304726	2.01589	0.356744	1.18632
C10406	1	1	1	0.822538	0.846886	0.959506	0.775375	0.95548	0.83061	0.688853	0.897321	0.793087
C10409	1	1	1	0.0759108	0.106674	0.0705244	0.0210659	0.0268932	0.0211863	0.0290115	0.0919582	0.0604848
C10426	1	1	1	0.178607	0.184783	0.227674	0.170659	0.266037	0.49264	0.470294	0.672341	0.571318
C10434	1	1	1	0.907823	1.04387	0.96801	0.506865	0.44887	0.463818	0.645311	0.61519	0.630251
C10487	1	1	1	5.24705	1.34151	20.3911	0.871998	1.07762	0.980581	0.78809	0.934107	0.861099
C10511	1	1	1	0.743008	0.692977	0.933435	0.55512	2.21471	1.94152	3.23894	0.741003	1.98997
C10523	1	1	1	1.29456	1.36702	1.40959	1.37768	4.09691	1.64294	1.26648	4.83385	3.05017
C10526	1	1	1	1.18492	1.02214	1.28351	1.0101	1.14588	0.997292	0.798936	0.820089	0.809512
C10544	1	1	1	1.15806	1.50199	1.62179	0.838863	0.658834	0.586862	0.718355	0.846902	0.782629
C10556	1	1	1	0.715658	0.401093	0.445621	0.375088	0.377936	0.402825	0.526179	0.426527	0.476353
C10559	1	1	1	1.28426	1.19132	1.35841	0.665334	0.769413	2.70443	1.16275	1.08789	1.12532
C10560	1	1	1	0.841472	0.803125	4.9489	0.896827	0.904175	0.88377	0.987187	0.849281	0.918234
C10562	1	1	1	0.487708	0.468262	0.492526	0.432193	0.409248	0.399515	0.515265	0.564243	0.539754
C10565	1	1	1	0.240915	0.308384	0.282777	0.318479	0.323064	0.35914	0.431902	0.374836	0.403369
C10582	1	1	1	0.568208	0.536531	0.755974	0.552967	0.555956	0.560245	1.35749	0.711682	1.03458
C10586	1	1	1	0.771888	0.72929	0.7541	0.655817	0.556777	0.593435	0.778631	0.781848	0.78024
C10597	1	1	1	0.709817	0.695849	0.775823	0.640285	0.628972	0.596337	0.919966	0.729575	0.82477
C10646	1	1	1	0.732689	0.585124	0.880671	0.308814	0.232971	0.24212	0.516311	0.653177	0.584744
C10654	1	1	1	0.818478	0.700838	0.966306	0.421924	0.353652	0.398805	0.598069	0.870809	0.734439
C10668	1	1	1	0.909161	0.937969	0.903449	0.906492	1.03741	0.971948	0.836139	0.912074	0.874106
C10693	1	1	1	0.747448	0.64861	0.94174	0.199999	0.164107	0.155314	0.604045	0.74678	0.675412
C10700	1	1	1	0.883054	0.72632	0.823932	0.639644	0.616831	0.58332	0.710214	0.783166	0.74669
C10702	1	1	1	0.205525	0.206821	0.24945	0.272226	0.242278	0.233729	7.33616	0.203925	3.77004
C10730	1	1	1	0.717083	0.763079	0.862999	0.797644	0.88721	0.799178	1.30595	0.741329	1.02364
C10736	1	1	1	1.00786	0.960729	0.548457	1.07641	1.05454	1.09113	0.808639	0.882517	0.845578
C10784	1	1	1	0.623616	0.606776	0.73089	0.658053	0.638601	0.62228	1.15726	0.649175	0.903218
C10798	1	1	1	0.976315	0.907439	0.989459	0.688103	0.634592	0.563427	0.792934	1.0994	0.946165
C10807	1	1	1	1.23512	1.50884	1.47749	0.581426	0.746254	0.563426	0.899962	0.851662	0.875812
C10810	1	1	1	0.993224	0.71591	1.32633	0.332082	0.326351	0.300116	1.98081	0.364418	1.17261
C10811	1	1	1	0.952	1.00303	1.01789	0.800116	0.707171	0.736644	0.959487	0.98027	0.969878
C10820	1	1	1	0.113654	0.149909	0.118317	0.137077	3.04853	3.14805	1.35836	0.108075	0.73322
C10831	1	1	1	1.94512	0.844798	1.53454	1.86366	1.62008	0.998656	0.576972	0.18673	0.381851
C10840	1	1	1	0.988093	0.705981	0.993689	0.200766	0.132113	0.126781	0.724779	2.12588	1.42533
C10869	1	1	1	0.967258	1.0151	0.968556	0.914812	0.86603	0.938711	1.05719	0.756881	0.907037
C10876	1	1	1	2.95664	2.45793	2.81502	1.04936	0.865614	0.887101	2.05488	3.27547	2.66517
C10921	1	1	1	2.08266	7.77898	2.84682	1.55202	0.939964	0.825219	2.19626	5.67283	3.93454
C10923	1	1	1	0.454501	0.482693	0.527593	0.501201	0.531878	0.519943	3.98371	0.507403	2.24556
C10928	1	1	1	0.665179	0.667675	0.757088	0.675795	0.616345	0.645286	0.684713	0.698472	0.691592
C10931	1	1	1	1.14004	0.732704	2.80034	1.18865	1.27454	1.88543	1.1143	1.50429	1.30929
C10933	1	1	1	1.25377	1.06414	1.4646	0.722535	0.620977	0.638877	0.671226	0.698872	0.685049
C10942	1	1	1	1.27238	1.68648	1.29562	1.74203	1.58354	1.61821	1.63231	1.56737	1.59984
C10947	1	1	1	2.33052	0.693767	1.8028	0.534894	0.498259	0.42702	0.437743	0.937011	0.687377
C10948	1	1	1	0.875449	1.10333	1.46162	0.850664	0.711263	0.679108	0.69616	0.565735	0.630948
C10949	1	1	1	0.540478	0.742465	0.785896	2.21548	2.68934	0.986615	0.277529	0.542048	0.409788
C10959	1	1	1	0.0340926	0.429076	0.0284697	0.054008	0.0125075	0.0124824	0.430929	0.175449	0.303189
C10964	1	1	1	0.614664	0.567877	2.28892	0.388773	0.411381	0.406385	0.541959	0.830744	0.686352
C10970	1	1	1	0.870005	0.787382	0.856357	0.585446	0.583583	0.576516	1.25577	0.738901	0.997333
C10985	1	1	1	0.326217	0.306293	0.294465	0.330861	0.327428	0.332435	0.309591	0.733603	0.521597
C10997	1	1	1	1.06742	1.57244	0.825303	5.33601	7.77845	6.82528	0.807891	2.22902	1.51845
C11001	1	1	1	0.870285	1.02243	1.05312	1.07458	1.29197	1.14902	0.827037	0.969861	0.898449
C11014	1	1	1	0.0972157	0.159398	2.41706	0.566987	0.105007	0.0470243	0.303142	0.430462	0.366802
C11019	1	1	1	0.636938	0.593451	0.600801	0.942021	0.826219	0.896225	0.562371	0.619946	0.591158
C11022	1	1	1	0.627832	0.554288	0.701844	0.46187	0.406898	0.426166	1.1267	0.587001	0.856852
C11029	1	1	1	1.04314	0.917786	0.963145	0.612449	0.638257	0.642773	0.774646	0.884102	0.829374
C11035	1	1	1	0.193351	0.182142	0.209601	0.161508	0.15783	0.143761	0.407115	0.467771	0.437443
C11041	1	1	1	0.937928	0.727023	0.966269	0.418543	0.330746	0.349565	0.618743	0.902284	0.760514
C11045	1	1	1	6.29635	4.45889	9.92911	0.553138	0.547236	0.525713	0.823925	0.71932	0.771622
C11052	1	1	1	0.982976	1.13028	4.10461	0.548825	0.486029	0.502215	0.698732	0.635411	0.667072
C11055	1	1	1	0.575331	0.564168	0.668907	0.438461	0.46831	0.432472	1.29743	0.605762	0.951598
C11061	1	1	1	2.95664	2.45793	2.81502	1.04936	0.865614	0.887101	2.05488	3.27547	2.66517
C11066	1	1	1	1.07245	0.979341	1.07678	0.929505	1.22352	1.12655	0.772915	0.857162	0.815038
C11085	1	1	1	7.9994	5.62193	3.04025	0.296612	0.120363	0.0427208	1.56733	0.217049	0.89219
C11086	1	1	1	0.623803	0.646678	0.685351	0.651426	0.637452	0.648417	0.848422	0.610963	0.729693
C11088	1	1	1	1.21903	1.15296	1.41275	1.02612	1.02762	0.993381	0.781725	0.864576	0.823151
C11092	1	1	1	16.2925	16.0006	39.9567	23.7979	24.8395	17.5606	1.82655	24.7647	13.2956
C11096	1	1	1	0.917419	0.930322	0.974908	0.956801	1.2311	1.08198	0.844127	0.891956	0.868042
C11112	1	1	1	0.675839	0.650026	0.737802	0.660749	0.641876	0.577363	0.671394	0.675519	0.673457
C11113	1	1	1	0.727652	0.71333	21.7935	0.688702	0.572643	0.599252	0.674968	0.709235	0.692102
C11114	1	1	1	1.33961	1.28533	8.04378	0.994844	1.02831	0.992491	0.862985	0.925115	0.89405
C11118	1	1	1	0.495969	0.591154	1.03139	0.405534	0.476549	0.422755	0.82333	0.857256	0.840293
C11134	1	1	1	0.601445	0.644055	0.716954	0.301912	0.698586	0.468124	0.787219	0.578186	0.682703
C11136	1	1	1	2.91295	2.42161	2.77341	1.08342	0.668686	0.677152	2.02451	3.22706	2.62579
C11149	1	1	1	1.56983	1.20747	4.60171	1.49762	1.53541	1.89782	0.403455	2.39187	1.39766
C11155	1	1	1	0.965903	0.740977	0.977454	0.488261	0.432382	0.39163	0.587909	0.961724	0.774816
C11165	1	1	1	1.11915	0.974869	7.31573	0.980227	1.12485	0.990094	0.78652	0.943169	0.864845
C11172	1	1	1	0.316045	1.20259	0.140777	0.0200939	0.019136	0.0190976	0.436286	0.0517102	0.243998
C11188	1	1	1	0.682005	0.659415	0.912402	0.576241	0.588718	0.558569	0.662645	0.729145	0.695895
C11195	1	1	1	0.771912	1.4787	1.19692	1.81378	1.81971	2.34554	2.08231	1.12116	1.60173
C11203	1	1	1	0.996965	1.02905	1.18368	0.677471	0.590073	0.549008	0.866301	1.15517	1.01073
C11222	1	1	1	0.636407	0.619839	0.687227	0.596777	0.560267	0.580243	1.09942	0.631143	0.865282
C11226	1	1	1	1.34436	1.16712	1.50319	0.737338	0.593298	0.520334	0.607248	0.692133	0.649691
C11228	1	1	1	0.858966	0.668213	0.834494	0.303746	0.198795	0.243221	0.580611	0.871437	0.726024
C11249	1	1	1	5.65886	24.8956	0.946574	1.06915	26.078	0.983372	0.700871	21.9213	11.3111
C11255	1	1	1	0.632543	4.01959	1.76972	0.331497	0.376791	0.327549	0.376645	0.353856	0.365251
C11268	1	1	1	0.967949	0.960076	1.0399	0.950572	1.2587	1.11494	0.816252	0.879903	0.848077
C11283	1	1	1	0.819391	0.784503	0.999804	0.722361	0.857422	0.745367	0.618158	0.805232	0.711695
C11292	1	1	1	3.08304	5.70106	4.17148	7.58005	10.1925	13.3639	1.36074	5.11776	3.23925
C11299	1	1	1	0.678267	0.680367	0.737204	0.687847	0.663713	0.693509	0.732663	0.721579	0.727121
C11301	1	1	1	1.16286	0.360168	0.409186	0.00992359	0.0109815	0.00880968	0.0117659	1.67146	0.841614
C11303	1	1	1	0.672673	0.645852	0.70987	0.596104	0.578298	0.551032	0.712381	0.778234	0.745307
C11309	1	1	1	0.302763	0.320693	0.748865	1.3186	0.990881	1.0481	1.85971	0.328604	1.09416
C11315	1	1	1	0.901005	0.878584	1.3926	0.712501	0.761624	0.692854	0.654348	0.603668	0.629008
C11318	1	1	1	3.43138	0.926139	1.8494	0.741134	0.423795	0.18816	0.037458	4.68722	2.36234
C11328	1	1	1	3.10155	2.5784	2.71712	0.729149	0.413272	0.501647	2.01689	3.436	2.72644
C11329	1	1	1	0.427223	0.393412	0.482243	0.271238	0.303955	0.252683	1.7467	0.556303	1.1515
C11331	1	1	1	0.313404	0.328389	0.164736	0.129483	0.0620543	0.302671	0.633031	0.268145	0.450588
C11334	1	1	1	0.0601243	0.0578788	0.049912	0.0172753	0.0119873	0.00382824	1.35172	0.0739469	0.712833
C11341	1	1	1	36.4205	46.4403	65.6503	4.00845	3.57578	2.87433	0.705577	0.674156	0.689866
C11342	1	1	1	0.950021	0.762314	6.47592	0.504936	0.502306	0.495835	0.686911	0.681274	0.684093
C11345	1	1	1	0.196054	0.203786	0.240163	0.21116	0.185523	0.270633	0.354805	0.54794	0.451372
C11351	1	1	1	0.882548	0.87702	0.873404	0.932419	0.925586	0.932604	0.9041	0.888101	0.8961
C11352	1	1	1	0.0615508	0.0632181	0.0650355	0.10949	0.13682	0.232641	0.0558314	0.0592247	0.057528
C11355	1	1	1	0.755242	0.762075	0.746768	0.452928	0.408366	0.404947	1.35299	0.732168	1.04258
C11371	1	1	1	0.525217	0.682098	5.0297	2.05824	1.16284	2.4622	0.494952	0.426509	0.460731
C11378	1	1	1	0.750495	0.781739	0.824387	0.740406	0.763056	0.72526	0.729148	0.811058	0.770103
C11437	1	1	1	1.47277	1.59297	1.17503	0.56736	0.540314	0.53923	0.836053	0.776704	0.806379
C11490	1	1	1	0.618366	0.711033	6.87357	0.31313	0.294716	0.290919	0.439555	0.399721	0.419638
C11504	1	1	1	0.119627	0.120948	0.149022	0.111704	0.174132	0.322454	0.311075	0.638127	0.474601
C11510	1	1	1	0.82098	1.40523	0.937579	1.51054	1.60516	1.47108	0.698567	1.17086	0.934714
C11516	1	1	1	1.32299	1.13505	1.5131	0.657835	0.637591	0.601838	0.681601	0.691866	0.686734
C11520	1	1	1	1.45628	0.891459	0.736887	0.896206	0.78622	1.73188	0.699508	0.699759	0.699633
C11544	1	1	1	0.0799051	0.386394	0.114753	0.12336	0.0605428	0.0771802	0.150686	0.537979	0.344332
C11571	1	1	1	0.872579	0.795738	1.64949	0.659122	0.692104	0.546195	0.532837	0.683959	0.608398
C11573	1	1	1	0.533349	0.526289	0.525991	0.507543	0.50599	0.495053	0.502931	0.519916	0.511423
C11584	1	1	1	0.0545298	0.0527363	0.0657844	0.0450825	0.0452463	0.0419304	0.121279	0.459241	0.29026
C11593	1	1	1	0.939677	0.86736	0.854938	0.748675	0.497825	0.556662	0.766377	0.885277	0.825827
C11602	1	1	1	0.122352	0.0904789	0.19957	0.0629811	0.06363	0.0580371	0.490303	0.542067	0.516185
C11604	1	1	1	0.72706	0.817987	0.8134	0.87848	0.207669	0.857919	0.618561	0.754493	0.686527
C11646	1	1	1	1.04293	1.3144	1.74125	1.01341	0.847336	0.685885	0.813958	0.873434	0.843696
C11655	1	1	1	0.713613	0.736158	0.886363	0.726287	0.718417	0.765987	1.28379	0.715175	0.999483
C11675	1	1	1	2.3709	2.866	0.227793	7.54688	5.49066	2.77052	0.236504	0.114362	0.175433
C11684	1	1	1	2.96828	2.46761	2.82609	1.05349	0.86902	0.890592	2.06296	3.28836	2.67566
C11695	1	1	1	0.675874	0.608144	0.216626	0.138622	0.116748	0.316018	0.218347	0.341833	0.28009
C11700	1	1	1	2.98302	2.47986	2.70146	1.05872	0.873336	0.895015	2.03932	3.30469	2.67201
C11707	1	1	1	1.21437	0.619494	0.684704	0.22569	0.167816	0.122458	0.142016	1.03095	0.586485
C11709	1	1	1	0.0330252	0.032096	0.0680926	0.951544	0.73082	0.677387	2.49201	0.0311022	1.26155
C11710	1	1	1	0.902871	0.902231	0.895528	0.908514	0.901137	0.924751	0.883221	0.88489	0.884055
C11711	1	1	1	3.06244	0.369837	0.831066	1.05997	1.18216	7.13758	0.727062	0.362508	0.544785
C11712	1	1	1	0.583868	0.570154	1.96894	0.629466	0.6021	0.606645	0.720047	0.749993	0.73502
C11714	1	1	1	1.18823	0.992653	1.10404	0.554868	0.402601	0.264629	0.575493	0.678703	0.627098
C11715	1	1	1	1.11709	0.584922	8.87183	0.513183	0.51748	0.524545	0.677006	0.569384	0.623195
C11729	1	1	1	1.00196	1.0798	1.23715	0.456891	0.034663	0.435517	0.224242	1.03223	0.628236
C11758	1	1	1	0.46957	0.116882	3.34478	0.111192	0.0989596	0.0954677	2.99649	0.153642	1.57507
C11769	1	1	1	0.579352	0.572684	0.56715	0.544105	0.555191	0.523359	1.22428	0.568233	0.896256
C11773	1	1	1	4.99625	3.85592	3.90278	1.53285	0.597456	0.281681	0.166088	9.14706	4.65657
C11774	1	1	1	0.889767	0.855839	0.840856	0.917728	0.921055	0.942678	0.912738	0.893789	0.903264
C11800	1	1	1	1.17486	4.33411	7.97905	0.851026	0.668387	0.573809	0.714116	0.813993	0.764055
C11803	1	1	1	1.00165	0.795942	1.06288	0.435853	0.343811	0.363374	0.600053	0.957725	0.778889
C11804	1	1	1	0.68363	0.562838	7.26924	0.225139	0.177949	0.186752	0.61686	0.953231	0.785046
C11806	1	1	1	0.717202	0.610696	0.854598	0.244305	0.179127	0.179168	0.662742	0.995516	0.829129
C11810	1	1	1	0.846178	0.839065	0.833914	0.775645	0.797493	0.769133	0.807123	0.840274	0.823699
C11819	1	1	1	0.254114	0.263079	0.316256	0.350009	0.311503	0.287695	1.39226	1.05544	1.22385
C11830	1	1	1	1.52189	1.39282	1.55294	0.740871	0.461538	0.516973	1.32988	1.54038	1.43513
C11831	1	1	1	0.197598	0.997831	0.405648	0.222207	0.178857	0.174217	1.96618	0.968683	1.46743
C11841	1	1	1	0.705951	0.643319	0.72163	0.689696	0.760554	0.791567	0.70343	0.668399	0.685915
C11849	1	1	1	5.48172	1.26308	3.22117	1.16975	1.39797	1.2284	1.75438	2.3103	2.03234
C11878	1	1	1	0.637864	0.673903	0.779784	0.798808	0.773404	0.704458	0.660667	0.716948	0.688807
C11891	1	1	1	0.194322	0.230366	0.528896	0.947202	0.711787	0.752886	1.3359	0.209448	0.772674
C11918	1	1	1	5.20409	0.412647	2.67454	0.574145	0.394387	0.247136	0.20076	0.811526	0.506143
C11923	1	1	1	0.75996	0.467985	0.466849	0.212881	0.155599	0.157195	0.0573792	0.398129	0.227754
C11959	1	1	1	1.74649	0.968321	1.44295	0.447468	0.263495	0.185509	0.0872213	2.41595	1.25159
C11960	1	1	1	0.687029	0.643385	0.533075	1.47586	1.47355	1.46885	0.300505	0.761369	0.530937
C11985	1	1	1	0.961356	0.992298	1.14141	0.653273	0.603479	0.529399	0.835359	1.11391	0.974632
C11987	1	1	1	0.251381	0.223668	0.312419	0.170672	0.149533	0.163779	1.76913	0.296842	1.03299
C11990	1	1	1	0.123984	0.199645	0.219312	0.0551147	0.0493604	0.0484059	1.38403	0.203271	0.79365
C11991	1	1	1	0.173604	0.140992	9.70969	1.10641	0.744505	0.748067	1.47345	0.188005	0.830727
C11998	1	1	1	0.779869	0.680508	1.00933	0.203763	0.170091	0.166306	0.591917	0.723138	0.657528
C12011	1	1	1	0.921294	0.950947	1.09384	0.62605	0.572224	0.534019	0.800548	1.06749	0.934017
C12012	1	1	1	0.832303	2.71469	1.70724	0.401297	0.380875	0.360935	0.659036	0.64529	0.652163
C12027	1	1	1	0.784175	0.831028	0.670586	1.76067	1.79294	0.832404	0.562299	0.598064	0.580182
C12039	1	1	1	0.834695	0.827303	3.70404	0.860563	0.900586	0.868657	0.820403	0.869142	0.844773
C12044	1	1	1	0.22435	0.239238	0.293523	0.181482	0.183521	0.185122	2.68099	0.243168	1.46208
C12045	1	1	1	0.879864	0.660681	0.831409	0.337487	0.19806	0.242322	0.589587	0.868215	0.728901
C12062	1	1	1	0.406816	0.398686	0.549291	0.460145	0.638188	0.405085	0.386178	0.388095	0.387137
C12065	1	1	1	0.308294	0.496512	0.750431	0.306417	0.297598	0.290332	0.564493	0.280232	0.422363
C12081	1	1	1	0.650785	0.509435	1.45033	0.474368	0.446937	0.437222	0.903384	0.767922	0.835653
C12098	1	1	1	0.543919	0.465656	0.683489	0.169526	0.138215	0.127011	0.530155	0.547654	0.538905
C12101	1	1	1	0.708427	0.768313	0.770644	0.464433	0.562631	0.466729	0.838272	0.746813	0.792543
C12108	1	1	1	0.0398727	0.0341479	0.0447639	0.0910117	0.839697	0.0429519	0.0368444	0.0906099	0.0637272
C12109	1	1	1	0.934474	1.50997	1.65233	1.90886	5.42447	3.30058	0.690252	1.13221	0.91123
C12110	1	1	1	0.647814	0.737222	0.686086	0.715686	0.746089	0.647805	0.635607	0.74224	0.688923
C12114	1	1	1	0.6666	0.655512	0.701448	0.612741	0.592415	0.592851	0.736218	0.711944	0.724081
C12127	1	1	1	2.53777	2.31367	1.78039	0.661992	0.664114	0.627446	0.715549	0.676831	0.69619
C12150	1	1	1	1.91298	1.54042	1.72473	0.834377	0.58872	0.566876	3.16984	2.13553	2.65268
C12153	1	1	1	0.53389	0.580951	0.710316	0.519569	0.522378	0.526408	1.2755	0.668698	0.972099
C12154	1	1	1	0.55456	0.603724	0.77969	0.311753	0.357453	0.0554811	0.0567754	0.928791	0.492783
C12215	1	1	1	0.641524	0.618869	0.731318	0.649187	0.639905	0.627482	1.83927	0.640428	1.23985
C12216	1	1	1	0.931617	0.570665	0.919436	0.320876	0.228464	0.140189	0.178021	1.33671	0.757365
C12244	1	1	1	1.96003	1.46352	4.25699	1.45397	0.639307	0.744936	1.17413	0.797911	0.986022
C12256	1	1	1	0.881182	0.849346	1.27624	0.51681	0.472516	0.41309	0.639206	0.725903	0.682554
C12287	1	1	1	0.40578	0.400676	0.417084	0.448911	0.422206	0.412127	0.421987	0.396936	0.409462
C12288	1	1	1	0.649061	0.808828	0.782568	0.713933	0.579249	3.61144	1.68348	0.62164	1.15256
C12304	1	1	1	0.996866	1.07786	0.778362	0.392738	0.401547	0.529571	2.9796	0.885134	1.93237
C12310	1	1	1	0.857408	0.668533	0.792973	0.268331	0.175249	0.193664	0.585158	0.842947	0.714053
C12311	1	1	1	0.758965	0.839951	0.776852	0.747107	0.733796	0.713582	0.845386	0.746326	0.795856
C12312	1	1	1	0.955712	0.644349	10.2528	0.55928	0.571825	0.550073	2.62435	1.06004	1.84219
C12332	1	1	1	0.905084	1.46253	0.97203	0.977223	0.925113	18.6548	0.935396	0.769855	0.852625
C12333	1	1	1	2.19699	1.31446	1.21021	0.600476	0.446548	0.595599	0.0570945	0.677646	0.36737
C12337	1	1	1	0.584589	0.561052	0.681105	0.473725	0.453042	0.445261	1.2505	0.550766	0.900635
C12367	1	1	1	0.0150381	0.0330189	0.0155272	0.0152522	0.0150939	0.0153247	0.0683804	0.441186	0.254783
C12389	1	1	1	0.282466	0.293054	0.535162	0.746295	0.773841	0.72555	1.82416	0.31544	1.0698
C12390	1	1	1	0.825468	0.812431	0.81795	0.904449	0.894988	0.938285	0.894525	0.808303	0.851414
C12393	1	1	1	0.630395	0.540106	0.636756	0.457029	0.435832	0.42262	0.772934	0.635202	0.704068
C12404	1	1	1	0.712631	0.614311	0.737918	0.349793	0.298431	0.292373	0.126487	0.767997	0.447242
C12406	1	1	1	0.44612	0.487603	0.54969	0.44747	0.437624	0.398613	1.12883	0.64631	0.88757
C12436	1	1	1	0.977281	0.658958	0.740076	0.736618	0.742652	1.16723	0.768596	0.697565	0.733081
C12448	1	1	1	0.241368	0.931733	0.827358	0.864804	0.805636	1.04261	0.257435	0.476097	0.366766
C12454	1	1	1	0.830473	0.77333	0.76832	0.150042	0.170481	0.151362	0.284339	1.03864	0.661488
C12531	1	1	1	0.192625	1.10921	0.881703	0.469707	0.402088	0.257715	0.449271	0.309735	0.379503
C12552	1	1	1	1.42858	1.41213	1.39849	1.34166	1.369	1.25998	0.529095	1.40116	0.965127
C12570	1	1	1	1.48891	1.36168	1.51822	0.771894	0.465109	0.542994	1.46613	1.62109	1.54361
C12599	1	1	1	0.023292	0.0242107	0.0255265	0.0237459	0.022041	0.0321524	1.28907	0.582017	0.935542
C12600	1	1	1	0.303102	0.226004	0.271963	0.128854	0.0812865	0.0986577	0.206184	0.244468	0.225326
C12669	1	1	1	0.692879	0.657292	0.718655	0.523668	0.513999	0.471522	0.772355	0.739394	0.755874
C12755	1	1	1	0.319518	0.556228	0.255654	0.0404618	0.0439591	0.0381541	0.690825	0.518075	0.60445
C12767	1	1	1	0.709816	0.714358	0.835905	0.966708	0.845224	0.829998	6.63634	0.711601	3.67397
C12835	1	1	1	0.993806	1.07473	1.12198	0.638764	1.34679	1.49824	0.851252	1.08916	0.970208
C12842	1	1	1	0.948764	0.864856	1.01093	1.40622	1.86296	0.549755	0.725515	0.934656	0.830086
C12891	1	1	1	0.632044	0.588031	17.7423	0.400182	0.414392	0.396683	0.702905	0.669725	0.686315
C12915	1	1	1	5.12356	4.24372	4.21481	0.201438	0.0754487	0.0675205	0.543786	2.44771	1.49575
C12937	1	1	1	0.890472	0.753905	0.728402	0.271909	0.27471	0.268823	2.11679	1.30939	1.71309
C12954	1	1	1	1.25655	1.63581	1.63512	3.12147	5.04076	1.43553	0.686866	1.29119	0.989027
C12958	1	1	1	0.997235	0.958501	1.59883	0.882343	0.835429	0.815859	0.671911	0.714215	0.693063
C12986	1	1	1	1.88679	0.443288	1.21315	0.869881	0.725095	2.67697	0.7603	0.564779	0.66254
C12987	1	1	1	1.96866	3.75582	2.68654	0.384665	0.366328	0.365593	0.549215	0.526598	0.537907
C13038	1	1	1	0.787696	0.765533	0.904616	0.773596	0.730666	0.737219	0.950092	0.74183	0.845961
C13044	1	1	1	0.416712	0.704735	0.409864	0.07359	0.0892957	0.439295	0.0856432	0.560532	0.323088
C13077	1	1	1	0.379546	0.18021	0.775505	0.306779	0.0770146	0.234895	1.56749	0.19898	0.883235
C13140	1	1	1	0.652855	0.558386	3.01633	2.2015	3.46502	3.49268	1.12182	1.12562	1.12372
C13154	1	1	1	1.02026	0.948688	1.7967	0.932222	0.793507	0.781294	0.639994	0.945815	0.792905
C13168	1	1	1	1.85888	0.202923	0.17927	0.11325	0.114945	0.113622	0.255925	4.32491	2.29042
C13179	1	1	1	1.17601	1.27199	0.938263	0.453039	0.431443	0.430577	0.646838	0.620202	0.63352
C13244	1	1	1	0.724859	0.715079	0.763648	0.658481	0.677591	0.682383	0.749509	0.787299	0.768404
C13280	1	1	1	0.829485	0.916926	1.01352	0.839502	1.0345	0.899305	0.727866	0.88749	0.807678
C13299	1	1	1	1.05785	1.07267	1.06992	0.951836	0.824454	0.839438	1.00552	1.03351	1.01951
C13309	1	1	1	0.379429	0.430041	0.46417	0.296899	0.155299	0.144045	1.40461	0.305843	0.855227
C13355	1	1	1	0.511029	2.69221	1.16241	0.0801826	0.0576407	0.0155511	1.44964	0.22113	0.835386
C13391	1	1	1	0.712017	2.63306	0.511256	0.495919	1.75926	1.13881	1.08809	0.602845	0.845469
C13424	1	1	1	1.73561	1.2199	1.62029	0.96412	0.922165	0.804765	2.15334	1.61625	1.8848
C13429	1	1	1	0.638059	0.625311	0.804855	0.726094	0.849412	0.711792	0.645675	0.687031	0.666353
C13444	1	1	1	0.696683	0.717668	0.738815	0.49617	0.430191	0.434228	0.683999	0.740668	0.712334
C13522	1	1	1	1.28141	1.64432	1.48776	0.749236	0.631132	0.564906	0.844312	0.736901	0.790607
C13620	1	1	1	0.887151	0.932983	0.958948	11.3718	13.2224	25.7964	0.777633	0.949189	0.863411
C13688	1	1	1	0.269481	0.284293	0.339736	0.298708	0.262442	0.382838	0.506702	0.723646	0.615174
C13698	1	1	1	0.00411665	0.878685	0.0197124	0.421239	0.00257722	0.00246071	0.284922	5.05697	2.67095
C13711	1	1	1	0.921506	0.87175	0.884978	0.887974	0.944857	0.919623	0.906679	0.904144	0.905411
C13718	1	1	1	0.200213	0.243523	0.238737	0.264581	0.23437	0.292661	0.356066	0.536826	0.446446
C13719	1	1	1	15.9749	9.66388	116.301	0.88141	1.08176	1.00642	0.792869	0.866332	0.8296
C13720	1	1	1	1.73051	0.572851	3.23617	1.69863	1.5577	0.510357	0.61577	0.850198	0.732984
C13721	1	1	1	0.447451	1.79407	3.97904	1.23394	0.497666	0.534692	2.82742	0.841131	1.83428
C13728	1	1	1	0.0562817	0.0634976	0.0477163	0.0478076	0.030688	0.0356487	0.234126	0.0730422	0.153584
C13750	1	1	1	0.294207	0.440617	0.585876	1.43408	1.07766	1.13988	2.02258	0.411597	1.21709
C13757	1	1	1	1.15705	0.98771	1.44886	0.888005	0.633922	0.653598	0.653177	0.677847	0.665512
C13812	1	1	1	1.29271	0.744173	0.882322	0.403157	0.213612	0.243305	0.152615	1.25067	0.701643
C13824	1	1	1	0.684352	0.623029	0.682758	0.506176	0.525103	0.51801	1.17018	0.565649	0.867913
C13826	1	1	1	0.546085	0.572655	0.687246	0.44437	0.450586	0.435917	1.12204	0.622369	0.872206
C13837	1	1	1	1.0378	1.03685	1.27004	0.655038	0.527075	0.408794	0.63256	0.718355	0.675457
C13838	1	1	1	0.729573	0.75207	0.691466	0.678175	0.667506	1.0748	0.335417	0.820309	0.577863
C13843	1	1	1	1.57992	2.35612	2.0351	4.23482	5.1508	5.21602	6.73709	0.376873	3.55698
C13877	1	1	1	4.11019	1.86858	4.63049	1.1027	1.32957	0.969748	1.3981	0.797439	1.09777
C13901	1	1	1	2.99301	2.48817	2.71051	0.703631	0.417165	0.484091	1.9463	3.31576	2.63103
C13906	1	1	1	0.667907	0.667859	2.19363	0.615286	0.580839	0.587629	0.648947	0.714072	0.681509
C13910	1	1	1	0.483346	1.83073	1.3666	0.213679	0.354877	0.434655	0.371088	0.633953	0.502521
C14039	1	1	1	0.497624	0.57331	2.7877	0.951156	0.481471	0.590541	0.850243	0.376535	0.613389
C14077	1	1	1	0.845049	0.833742	0.839707	0.874711	0.940559	0.942185	0.848012	0.881553	0.864782
C14112	1	1	1	0.448357	0.261774	0.467613	0.966316	1.536	0.439671	0.223535	0.229485	0.22651
C14114	1	1	1	0.693179	1.16972	0.858448	1.03082	0.822047	1.70213	0.701497	0.701758	0.701628
C14147	1	1	1	1.45459	2.23826	1.46199	1.01037	1.68826	1.22184	0.804568	0.938591	0.871579
C14155	1	1	1	5.36865	39.579	23.4138	4.53492	0.698142	2.47999	2.06698	29.2584	15.6627
C14164	1	1	1	0.765937	0.628198	0.696675	0.339944	0.292583	0.282233	0.517728	0.756687	0.637207
C14179	1	1	1	0.801439	1.54849	1.27056	1.38726	6.44338	0.761827	0.76445	1.70673	1.23559
C14186	1	1	1	3.01324	8.37573	6.24921	3.13963	0.405324	0.487363	1.94333	6.84398	4.39366
C14190	1	1	1	1.1544	0.786488	0.316631	1.39355	1.39675	0.353725	0.169855	0.757065	0.46346
C14201	1	1	1	0.720456	0.681491	0.727332	0.631528	0.629617	0.664679	0.888676	0.703789	0.796232
C14211	1	1	1	0.817523	2.26575	2.81633	0.974099	0.516669	0.599432	2.05584	2.84451	2.45018
C14213	1	1	1	1.11981	0.975442	2.02904	0.980803	1.12551	0.990676	0.786982	0.943723	0.865353
C14216	1	1	1	0.79663	0.76901	0.947788	0.571047	0.599622	0.460728	0.576002	0.576815	0.576409
C14222	1	1	1	0.837141	0.817984	0.874972	0.865145	0.888222	0.890166	0.856576	0.877097	0.866836
C14226	1	1	1	0.0935402	0.0801379	0.101754	0.0706165	0.0671407	0.0667426	0.0722003	0.0909798	0.0815901
C14251	1	1	1	0.215647	0.206586	0.205258	0.209668	0.200846	0.199889	0.386299	0.869862	0.628081
C14279	1	1	1	0.390231	0.506197	3.16332	2.68031	3.5274	3.20968	1.80372	1.84582	1.82477
C14302	1	1	1	9.61106	10.5768	3.93069	0.129507	0.0424566	0.0423714	1.21789	0.168541	0.693216
C14307	1	1	1	0.691216	0.648576	1.31995	0.410973	0.399968	0.388214	0.558141	0.78489	0.671515
C14318	1	1	1	0.312337	0.308986	0.309709	0.293036	0.317651	0.385511	0.904741	3.6239	2.26432
C14325	1	1	1	2.42656	10.5647	1.0409	10.9303	1.87181	13.1671	1.29743	10.9003	6.09886
C14328	1	1	1	3.48733	2.02933	3.15755	0.681433	1.03236	2.51634	0.405991	6.4558	3.43089
C14332	1	1	1	0.189056	0.205095	0.2245	0.193452	0.221266	0.205143	1.26375	0.213772	0.73876
C14333	1	1	1	0.690466	5.5147	2.21915	2.63446	0.892075	1.24194	0.670374	1.51426	1.09232
C14339	1	1	1	0.707215	0.697219	0.745815	0.561278	0.545222	0.508231	0.771185	0.824422	0.797803
C14343	1	1	1	4.48967	5.80553	0.430083	0.402476	0.959431	0.23194	7.62907	0.600391	4.11473
C14387	1	1	1	1.00209	0.562902	0.871989	0.10876	0.100595	0.0955159	0.175019	1.19788	0.68645
C14388	1	1	1	0.823146	0.858445	0.804321	0.894243	0.900271	0.905976	0.897714	0.855873	0.876793
C14395	1	1	1	0.245697	0.260244	0.312413	0.499618	0.494062	0.469496	0.413292	0.286323	0.349808
C14396	1	1	1	0.00474177	0.658273	0.545891	0.0897515	0.072709	0.0784135	0.126381	0.00492803	0.0656546
C14397	1	1	1	0.596758	0.505708	0.533362	0.431092	0.419404	0.418488	0.40142	0.508673	0.455047
C14398	1	1	1	1.11303	1.99361	0.826747	0.777849	0.830533	1.05367	0.735828	0.865143	0.800486
C14402	1	1	1	0.9177	0.95421	0.840851	1.37477	1.41523	1.4359	0.6725	0.67708	0.67479
C14416	1	1	1	1.25377	1.06414	6.36574	0.722535	0.653961	0.626098	0.70054	0.734506	0.717523
C14422	1	1	1	0.678995	1.16954	2.27205	0.244289	0.31745	0.245663	0.582697	0.441948	0.512323
C14428	1	1	1	2.5706	3.80194	18.4011	0.977752	1.01952	0.966849	0.840688	0.931191	0.88594
C14430	1	1	1	0.857393	0.985881	0.933105	0.554011	0.581734	0.446983	0.609464	0.581017	0.59524
C14436	1	1	1	1.06727	1.02625	1.46011	0.674624	0.655219	0.642726	0.678663	0.694544	0.686603
C14441	1	1	1	0.846194	0.700183	0.77541	0.35414	0.313277	0.290408	0.199829	0.868708	0.534269
C14460	1	1	1	0.491722	1.92204	2.18879	2.14663	0.365652	1.12414	2.34819	2.18853	2.26836
C14470	1	1	1	0.805351	1.55739	1.75799	0.778374	0.456722	0.99061	1.03199	0.801765	0.916876
C14472	1	1	1	0.692879	0.657292	0.68236	0.529135	0.513999	0.479127	0.757	0.739394	0.748197
C14512	1	1	1	0.0592946	0.56271	1.07439	0.296454	0.255556	0.220328	2.71011	0.979375	1.84474
C14519	1	1	1	1.70548	1.84818	3.53691	1.40559	0.55484	0.163082	0.143027	2.08657	1.1148
C14526	1	1	1	9.70667	1.31327	2.51071	0.187011	0.192206	0.19483	0.203349	1.11297	0.658159
C14533	1	1	1	0.879069	0.609311	1.30999	0.0830758	0.119334	0.120973	0.19966	0.00938708	0.104524
C14537	1	1	1	0.823423	1.0373	3.96691	0.896916	0.870201	0.858643	0.894204	0.900107	0.897155
C14543	1	1	1	0.620279	0.597469	0.677973	0.492135	0.438321	0.712559	0.640353	0.635659	0.638006
C14561	1	1	1	0.674409	0.543181	0.752688	0.227545	0.174888	0.176592	0.458957	0.675842	0.567399
C14574	1	1	1	1.34484	0.953858	0.856512	0.378596	1.96437	0.405566	2.39395	0.400238	1.3971
C14592	1	1	1	1.34659	1.1553	4.95251	0.655417	0.642636	0.649468	0.678322	0.704206	0.691264
C14596	1	1	1	0.403979	0.258105	0.301085	0.0959527	0.08139	0.0735455	0.0392477	0.455519	0.247383
C14602	1	1	1	6.10311	5.92654	1.29624	5.33007	1.14444	0.972959	0.348543	4.77402	2.56128
C14642	1	1	1	6.53154	1.19454	2.69271	2.03159	1.12997	2.14418	0.509423	2.85075	1.68009
C14689	1	1	1	0.675383	0.650454	0.66592	0.710397	0.748867	2.67364	0.485022	0.497781	0.491402
C14701	1	1	1	1.92897	9.0513	3.53842	5.99413	4.95728	2.20969	0.544929	0.687939	0.616434
C14702	1	1	1	0.781358	0.77479	0.77585	0.767735	0.736403	0.712533	0.745295	0.794034	0.769664
C14704	1	1	1	0.362495	0.876845	2.36442	4.22999	2.51383	0.917275	0.816541	0.858318	0.837429
C14713	1	1	1	0.31192	0.308693	0.333178	0.289033	0.308513	0.288726	1.82918	0.316088	1.07263
C14744	1	1	1	0.474027	0.324523	0.249117	0.518959	0.255733	0.322454	0.327561	1.28778	0.80767
C14752	1	1	1	2.41382	2.92267	1.50008	3.63804	13.8585	3.30533	3.13845	0.506119	1.82228
C14758	1	1	1	0.527279	0.51153	0.353133	0.0815161	0.278181	0.294015	0.203295	0.601186	0.402241
C14765	1	1	1	0.418279	0.136791	0.225042	0.173598	0.137909	0.168133	0.258215	0.332725	0.29547
C14767	1	1	1	0.197183	0.163568	0.833337	0.0905575	0.081201	0.0827705	2.85655	0.24918	1.55287
C14774	1	1	1	0.307028	0.482166	0.395775	1.8845	0.156548	0.481727	1.75362	0.682964	1.21829
C14788	1	1	1	1.98155	2.77257	2.31307	2.59553	2.50312	2.51981	0.275009	1.6193	0.947155
C14796	1	1	1	0.0209282	2.83615	0.0343687	0.852841	0.0297705	0.0551282	1.6785	0.114597	0.896546
C14826	1	1	1	0.579658	0.538572	0.859442	0.213744	0.149377	0.14844	0.562682	0.501461	0.532071
C14841	1	1	1	1.24454	1.2394	1.19137	2.80219	2.47084	2.69177	0.629527	0.899439	0.764483
C14843	1	1	1	0.554766	0.544002	0.671899	0.465049	0.466739	0.438036	1.25106	0.611873	0.931464
C14846	1	1	1	0.816052	0.606517	0.838147	0.190339	0.152002	0.167356	0.631725	0.776126	0.703925
C14852	1	1	1	0.819016	0.890108	0.857167	0.974666	0.987806	0.908786	2.41741	0.899088	1.65825
C14853	1	1	1	0.938	1.03323	0.525169	1.31554	1.02138	0.975383	0.997272	0.758804	0.878038
C14860	1	1	1	2.11156	1.91059	2.04662	2.0419	1.96898	1.75881	0.173308	1.71239	0.94285
C14863	1	1	1	0.231246	0.240016	0.30283	0.187237	0.18934	0.190992	2.50774	0.235309	1.37152
C14866	1	1	1	1.11293	0.865241	0.701263	1.41256	1.30713	1.24282	0.70723	0.831379	0.769305
C14922	1	1	1	0.871603	0.821114	4.49183	0.875689	0.924788	0.905822	0.847455	0.913205	0.88033
C14923	1	1	1	0.584589	0.561052	0.681105	0.473725	0.453042	0.445261	1.2505	0.550766	0.900635
C14960	1	1	1	1.85439	1.48316	1.42366	2.47715	2.658	2.46889	1.44702	1.65399	1.5505
C14973	1	1	1	0.696268	0.664549	0.85853	0.723344	0.741849	0.695878	0.960756	0.726859	0.843808
C15021	1	1	1	2.59134	2.03884	3.19996	1.83027	1.68575	1.27361	0.6502	2.68818	1.66919
C15025	1	1	1	1.3478	3.54809	2.43893	0.844968	0.429272	0.422228	0.191275	0.136393	0.163834
C15032	1	1	1	0.0280288	0.0493233	0.101716	0.0551805	0.0467831	0.0489387	0.854256	1.14995	1.0021
C15066	1	1	1	1.69849	1.09974	1.39641	0.619841	0.171979	0.223616	0.125215	3.36579	1.7455
C15084	1	1	1	1.00846	0.969285	1.75362	0.89227	0.844828	0.825039	0.679471	0.722251	0.700861
C15112	1	1	1	1.99301	1.31054	1.78505	0.5172	0.324449	0.39473	1.58525	1.95683	1.77104
C15117	1	1	1	0.549978	0.47705	0.689856	0.175935	0.140387	0.133899	0.563235	0.53152	0.547377
C15145	1	1	1	1.1755	1.98199	2.32686	1.1931	0.802838	0.80668	1.35983	2.98695	2.17339
C15147	1	1	1	0.759004	0.638637	0.793145	0.474149	0.407751	0.420531	0.620299	0.765868	0.693084
C15152	1	1	1	0.371526	0.226259	1.97742	0.5522	0.216611	0.859011	1.25109	0.629474	0.940281
C15182	1	1	1	0.276587	0.484773	0.445006	0.0823107	0.119238	0.11781	0.449093	0.438417	0.443755
C15202	1	1	1	0.31759	0.386291	1.14253	0.419694	0.371772	0.464236	0.656918	0.572367	0.614642
C15214	1	1	1	1.59817	1.43105	0.772692	1.64805	1.91879	0.736598	0.4942	0.311541	0.40287
C15230	1	1	1	1.65011	1.78479	1.31651	0.635677	0.605375	0.60416	0.881249	0.870229	0.875739
C15309	1	1	1	0.568967	0.533888	0.964196	0.553706	0.556699	0.504767	1.3593	0.712633	1.03597
C15322	1	1	1	1.67148	13.2675	5.93543	15.5892	11.2377	15.4241	4.30812	0.403135	2.35563
C15346	1	1	1	0.725106	0.748015	0.844822	0.737985	0.716116	0.722974	1.25116	0.726694	0.988927
C15358	1	1	1	1.19728	1.55285	1.54031	0.896458	0.749552	0.715666	0.742678	0.875579	0.809128
C15381	1	1	1	0.220095	0.139122	1.50832	0.113627	0.105338	0.120597	1.8551	0.199687	1.0274
C15390	1	1	1	0.653218	0.646291	0.724112	0.580919	0.575442	0.534906	0.680569	0.80772	0.744145
C15424	1	1	1	0.51851	0.531918	0.742769	0.192521	0.131485	0.135383	0.555243	0.466063	0.510653
C15481	1	1	1	1.0077	0.802734	0.999009	5.60625	3.83391	5.76647	1.01033	0.99637	1.00335
C15485	1	1	1	0.841119	1.00555	0.637065	0.729293	0.934654	0.896977	0.513615	0.549147	0.531381
C15486	1	1	1	5.31777	5.77033	5.19784	0.525919	0.483323	0.481151	0.532619	0.540283	0.536451
C15493	1	1	1	0.790048	0.767819	0.951492	0.775906	0.732847	0.739421	0.954281	0.783897	0.869089
C15494	1	1	1	0.74292	1.76383	2.08717	2.23791	2.10805	2.14842	1.20366	0.733948	0.968805
C15497	1	1	1	0.720069	2.53238	1.80073	2.71376	3.94825	4.70312	1.26535	0.825496	1.04543
C15502	1	1	1	1.601	1.25445	1.10806	2.26956	5.75984	4.85362	0.0761677	0.869544	0.472856
C15503	1	1	1	0.914133	0.81503	0.844193	0.783638	0.766561	0.762898	1.04314	0.868072	0.955607
C15514	1	1	1	2.56623	17.6951	10.7443	0.715014	3.22232	2.88426	0.565518	1.32744	0.94648
C15545	1	1	1	1.34189	1.23579	1.52355	1.29662	1.17136	1.28198	1.31125	1.24612	1.27868
C15546	1	1	1	0.712631	0.614311	0.737918	0.494896	0.519051	1.26367	0.125759	0.767997	0.446878
C15556	1	1	1	0.691628	0.702715	0.724364	0.407795	0.336388	0.344739	0.78287	0.749118	0.765994
C15561	1	1	1	2.24507	1.80092	11.2687	0.723132	0.453069	0.102988	0.644634	0.460589	0.552611
C15562	1	1	1	0.975379	1.05225	1.0394	1.11882	1.34144	1.0528	0.843833	1.00037	0.922102
C15571	1	1	1	0.308072	0.628781	0.611698	3.12991	0.346333	0.446647	0.399763	3.88005	2.13991
C15572	1	1	1	0.825689	0.936057	0.949472	0.703003	0.69606	3.06227	0.343419	0.86233	0.602875
C15584	1	1	1	0.76663	0.729206	0.868845	0.801644	0.835956	0.792192	0.88438	0.899857	0.892118
C15602	1	1	1	1.21043	1.28737	1.42962	0.67663	0.500081	0.553478	1.75529	1.36246	1.55888
C15603	1	1	1	1.89781	0.74035	2.87284	0.754376	0.735712	0.742959	0.680453	0.715264	0.697859
C15604	1	1	1	0.958015	2.09972	1.37426	0.590748	1.15763	2.03213	0.525216	2.74421	1.63471
C15607	1	1	1	0.878877	1.01058	0.956486	0.567893	0.645486	0.561129	0.624735	0.606196	0.615466
C15612	1	1	1	0.814116	0.85375	0.812549	0.902973	0.92435	0.929088	0.887867	0.847122	0.867495
C15617	1	1	1	3.04884	2.76278	1.69736	1.39309	0.906134	0.435474	0.450935	0.399237	0.425086
C15622	1	1	1	1.52438	1.40822	1.54534	0.785684	0.473418	0.552694	1.48771	1.53973	1.51372
C15626	1	1	1	0.78367	0.748125	0.742904	0.671185	0.767021	1.06372	0.331959	0.836236	0.584098
C15656	1	1	1	0.902424	0.988496	1.1235	0.871998	1.07762	0.980581	0.78809	0.934107	0.861099
C15668	1	1	1	0.414952	0.986359	0.928834	1.18029	0.324365	0.198127	0.819926	0.164961	0.492443
C15679	1	1	1	1.10444	1.66506	1.2735	0.482324	0.306721	0.307289	0.372781	1.53341	0.953094
C15689	1	1	1	0.553735	0.46532	0.56272	0.318758	0.276185	0.29585	0.264884	0.561714	0.413299
C15694	1	1	1	0.0809214	0.38021	0.10149	0.110454	0.0148981	0.0147266	0.0294028	0.106416	0.0679095
C15698	1	1	1	0.673307	0.62642	5.47408	0.426307	0.441445	0.42258	0.748794	0.713448	0.731121
C15700	1	1	1	1.35864	0.507934	0.762827	8.68226	3.00552	8.43871	2.24034	1.84561	2.04297
C15719	1	1	1	0.882642	0.904386	2.31962	0.910685	0.90329	0.926961	0.885332	0.887004	0.886168
C15724	1	1	1	0.573818	0.550716	2.85296	0.464998	0.469788	0.441235	2.58112	0.558544	1.56983
C15725	1	1	1	0.744368	0.673677	0.984606	0.501519	0.512768	0.518648	1.13593	0.632197	0.884063
C15730	1	1	1	0.517935	0.265215	0.222962	0.0822603	0.0738731	0.0745857	0.893688	0.193994	0.543841
C15738	1	1	1	0.511917	0.468353	1.60481	0.446253	0.420853	0.409208	0.997091	0.609238	0.803164
C15739	1	1	1	0.11245	0.112441	0.282372	0.0351364	0.0887121	0.0755945	0.0504253	0.135103	0.0927644
C15746	1	1	1	1.10439	0.936912	1.48978	0.924524	0.659993	0.621918	0.560403	0.739717	0.65006
C15747	1	1	1	0.687876	0.646188	0.719788	0.556287	0.519697	0.498021	0.692801	0.744884	0.718843
C15758	1	1	1	0.679811	0.615251	0.976348	3.20506	1.79423	3.20827	0.98124	2.88964	1.93544
C15760	1	1	1	2.31103	1.42542	0.813298	0.651286	0.198143	0.141401	0.536415	2.54285	1.53963
C15767	1	1	1	0.997235	0.920819	1.4753	0.856674	0.835429	0.815859	0.671911	0.714215	0.693063
C15808	1	1	1	0.505409	0.9071	1.1388	1.38982	9.29533	10.8367	0.203609	0.372265	0.287937
C15809	1	1	1	0.0375123	0.0454141	0.0632766	0.0449759	0.0394625	0.0406587	0.0567787	1.80168	0.929228
C15823	1	1	1	0.644506	0.426994	0.449268	0.140503	0.0826045	0.0605611	0.249787	0.618143	0.433965
C15846	1	1	1	2.61193	2.17137	2.48682	7.65729	11.2155	13.121	1.8153	2.89359	2.35444
C15849	1	1	1	0.621905	0.646638	0.752639	0.575559	0.618469	0.6177	1.03671	0.656299	0.846504
C15850	1	1	1	0.134716	0.605691	0.504892	0.0822066	0.0855458	0.0562213	0.0717401	1.56402	0.817882
C15877	1	1	1	0.546347	0.512511	0.859863	0.19213	0.14036	0.141357	0.540227	0.501706	0.520967
C15892	1	1	1	0.872068	0.721387	0.976605	0.458859	0.30983	0.320104	0.6224	0.848549	0.735474
C15900	1	1	1	0.70981	0.546595	0.825783	0.280945	0.210926	0.205356	0.505495	0.605882	0.555689
C15903	1	1	1	1.3986	1.61194	1.75412	0.248445	0.114704	0.52842	2.33242	0.625146	1.47878
C15935	1	1	1	0.95051	0.957407	0.949704	0.977544	0.926043	0.924372	0.515904	0.924922	0.720413
C15943	1	1	1	0.816187	0.738676	0.803383	0.56908	6.37905	3.10292	1.17809	0.693194	0.93564
C15970	1	1	1	0.655039	0.65976	0.727279	0.527256	0.489162	0.473873	0.721405	0.681022	0.701214
C15971	1	1	1	0.743514	0.693272	6.12659	0.246667	0.199397	0.20134	0.505774	0.599683	0.552728
C16038	1	1	1	0.968584	1.00876	1.19791	0.885152	1.09387	0.963515	0.799979	0.863922	0.83195
C16146	1	1	1	0.419396	0.386323	0.473409	0.245439	0.275246	0.272159	1.60486	0.478999	1.04193
C16147	1	1	1	0.641463	0.612768	0.729419	0.644652	0.620314	0.621313	1.09609	0.655586	0.875836
C16150	1	1	1	0.816327	0.94316	0.89981	1.34399	1.31426	1.33525	0.780078	0.818955	0.799517
C16155	1	1	1	0.576461	0.493516	0.704761	0.179668	0.146484	0.133965	0.556307	0.580419	0.568363
C16159	1	1	1	0.636163	0.569131	0.748185	0.448463	0.446241	0.422879	0.826574	0.756036	0.791305
C16185	1	1	1	0.532081	0.190844	0.166155	0.552048	0.149865	0.138317	0.00936855	0.586947	0.298158
C16223	1	1	1	0.247695	0.329722	0.820944	1.30547	0.878453	0.882657	1.4879	0.572954	1.03043
C16246	1	1	1	1.11764	1.44957	2.44084	0.836833	0.699699	0.668066	0.693282	0.817343	0.755312
C16250	1	1	1	0.352626	0.200794	0.258052	0.152319	0.15403	0.155374	2.25017	0.484759	1.36746
C16280	1	1	1	0.485968	0.477623	0.713628	0.177004	0.131217	0.126604	0.5653	0.487128	0.526214
C16308	1	1	1	0.547475	0.455386	4.68947	0.362593	0.364922	0.362929	0.389482	0.472474	0.430978
C16323	1	1	1	1.05416	0.654099	0.884845	0.713823	0.694058	0.690834	1.3546	1.21509	1.28485
C16365	1	1	1	0.367669	0.501152	20.2874	0.305822	0.308237	0.299781	0.341875	0.323376	0.332626
C16366	1	1	1	2.52646	0.83586	26.965	0.642027	0.57736	0.585803	0.67246	0.757669	0.715065
C16392	1	1	1	0.597882	0.674112	0.202154	0.0721893	0.0983337	0.0854826	1.99544	1.66654	1.83099
C16395	1	1	1	0.436213	2.38928	2.35267	3.44894	5.83176	5.55681	0.207296	0.921284	0.56429
C16396	1	1	1	2.09751	1.82954	1.62734	0.168598	0.0203457	0.145728	3.69326	2.87216	3.28271
C16407	1	1	1	0.339466	0.323332	0.33821	0.356875	0.382567	0.362932	0.373456	0.33313	0.353293
C16408	1	1	1	0.246574	0.413552	1.08336	0.180367	0.180313	0.180534	0.188995	1.2332	0.711095
C16415	1	1	1	0.68266	0.104178	0.123683	1.09881	0.739394	0.742933	1.25237	1.13468	1.19353
C16417	1	1	1	0.549978	0.47705	0.689856	0.175935	0.140387	0.133899	0.563235	0.53152	0.547377
C16440	1	1	1	2.95959	1.63334	10.98	1.35841	0.675877	0.362495	0.154337	0.672872	0.413604
C16448	1	1	1	0.51295	0.4366	4.91222	0.172383	0.13062	0.129723	0.477905	0.507428	0.492667
C16449	1	1	1	0.94168	0.918247	1.43885	0.784168	0.796007	0.821491	0.695398	0.710514	0.702956
C16450	1	1	1	1.25273	1.53928	1.86395	0.649824	0.383815	0.429688	1.47561	2.39318	1.9344
C16476	1	1	1	0.806336	0.812787	0.814035	0.749884	0.762011	0.732585	0.732954	0.803754	0.768354
C16483	1	1	1	0.207294	0.504437	1.92907	0.263589	0.234466	0.0901502	0.409032	0.371841	0.390436
C16485	1	1	1	1.92251	0.85801	1.15187	0.516566	0.479797	0.408638	0.632319	0.674353	0.653336
C16488	1	1	1	0.18045	0.21563	0.252553	0.163278	0.156074	0.156311	1.94286	0.225757	1.08431
C16517	1	1	1	1.01781	0.978279	1.51443	0.911071	0.839855	0.770797	0.658534	0.728952	0.693743
C16521	1	1	1	0.85793	0.487439	9.2986	0.241351	0.151911	0.107983	0.436462	0.663348	0.549905
C16525	1	1	1	3.25911	2.22116	2.5635	0.130215	0.126943	0.141469	0.123961	0.636496	0.380229
C16527	1	1	1	1.1277	1.03611	1.08779	0.66196	0.559757	0.514276	0.82718	1.07235	0.949765
C16533	1	1	1	0.68325	0.760915	0.796219	0.828575	0.76319	0.786914	0.670702	0.689476	0.680089
C16536	1	1	1	8.88979	0.660873	1.98873	1.897	2.26712	1.99211	2.8451	1.50388	2.17449
C16538	1	1	1	0.398197	0.406709	0.38286	0.411429	0.397999	0.382999	1.0692	0.415537	0.742371
C16542	1	1	1	0.83323	0.79968	0.852253	0.809692	0.808933	0.792047	0.751206	0.842642	0.796924
C16543	1	1	1	0.814925	1.78335	0.820508	3.39353	2.47726	1.42291	0.556164	0.80118	0.678672
C16546	1	1	1	0.545528	0.47319	0.694578	0.174511	0.139251	0.132816	0.558677	0.527219	0.542948
C16547	1	1	1	0.240591	0.0568475	0.0587561	0.0823552	0.187864	0.0698141	0.0473399	0.0490827	0.0482113
C16562	1	1	1	1.75537	0.077281	0.0731989	0.117663	0.333297	0.3019	0.125159	1.89168	1.00842
C16563	1	1	1	2.72834	1.74027	1.77886	0.764169	0.537177	0.224495	1.41547	3.25521	2.33534
C16566	1	1	1	2.85642	2.37462	2.71959	1.37216	2.59634	1.23088	1.98522	3.16444	2.57483
C16589	1	1	1	1.77473	0.694708	0.899108	1.78063	1.43929	2.34929	0.562445	0.829138	0.695792
C16612	1	1	1	0.828852	0.854151	0.795533	0.909502	0.885684	0.93262	0.896468	0.847703	0.872086
C16644	1	1	1	0.78233	0.689933	0.743928	0.501355	0.470074	0.493681	1.26881	0.813102	1.04096
C16671	1	1	1	0.702826	0.708778	0.722404	0.908654	0.742395	0.744186	0.730898	0.687508	0.709203
C16692	1	1	1	0.568218	0.580228	0.64547	0.599804	0.64702	0.602734	2.62219	0.65154	1.63687
C16712	1	1	1	2.97896	2.47648	2.60971	1.05728	0.872146	0.893795	2.03654	3.30019	2.66837
C16746	1	1	1	1.64891	0.608963	2.63403	1.09085	1.02231	0.774509	0.115957	2.47064	1.2933
C16765	1	1	1	0.899549	1.03435	0.959187	0.455517	0.408483	0.423206	0.639429	0.609583	0.624506
C16766	1	1	1	1.15054	0.710807	0.933329	0.407788	0.243277	0.0792546	0.160048	2.02054	1.09029
C16785	1	1	1	0.11316	0.35477	0.389125	0.158239	0.0112126	0.134548	0.419267	0.221032	0.32015
C16806	1	1	1	22.5496	27.4869	3.15013	3.26895	2.11642	1.63984	0.658534	0.728952	0.693743
C16831	1	1	1	0.740814	0.618862	0.810275	0.466118	0.436253	0.41926	0.668939	0.823695	0.746317
C16837	1	1	1	0.130527	0.20288	2.07178	0.112256	0.140229	0.125158	0.232981	0.134169	0.183575
C16838	1	1	1	2.30051	0.711562	0.883176	0.938868	0.909586	0.363675	4.13366	0.858198	2.49593
C16843	1	1	1	1.51104	11.3911	2.60854	1.49962	1.54497	2.46573	0.402846	0.701761	0.552304
C16850	1	1	1	1.00783	0.800851	1.05042	0.438541	0.345931	0.365615	0.603753	0.963631	0.783692
C16852	1	1	1	0.959212	0.933309	1.08192	0.564816	0.549624	0.52119	0.819311	1.11241	0.965861
C16868	1	1	1	0.811566	0.851075	3.10446	0.900144	0.895772	0.926177	0.885086	0.843832	0.864459
C16884	1	1	1	0.468616	0.459487	0.471628	0.467791	0.479435	0.491067	0.995416	0.490048	0.742732
C16903	1	1	1	0.881814	0.827956	1.7859	0.888359	0.882214	0.898622	0.836871	0.85261	0.84474
C16910	1	1	1	15.264	7.33435	0.616469	0.22135	0.201742	0.176277	2.21562	0.241124	1.22837
C16915	1	1	1	0.400732	0.39984	0.473536	0.422861	0.410361	0.400014	0.761006	0.417156	0.589081
C16919	1	1	1	0.645353	0.690845	0.768525	0.714153	0.722868	0.68079	0.90796	0.775753	0.841856
C16921	1	1	1	0.431783	1.54662	1.33275	0.173628	0.130545	0.632884	1.42356	0.202191	0.812876
C16923	1	1	1	0.732689	0.579228	0.866693	1.15918	0.864163	1.03169	0.516311	0.653177	0.584744
C16924	1	1	1	1.79426	1.82302	1.87918	0.840281	0.953234	0.610687	1.76268	1.91569	1.83919
C16931	1	1	1	1.16597	1.18537	0.36418	0.768678	0.717779	0.614074	0.161137	0.306867	0.234002
C16939	1	1	1	0.347366	0.349605	0.241086	0.449095	0.361427	0.367808	0.370867	0.350634	0.36075
C16985	1	1	1	0.313017	0.303072	0.336877	0.287853	0.911975	0.536137	1.88107	0.322811	1.10194
C16993	1	1	1	0.584944	0.207677	0.258298	0.0332419	0.0350392	0.0321557	0.332644	0.580426	0.456535
C16994	1	1	1	0.460381	0.845527	0.38604	0.805586	0.401549	1.29655	0.483327	0.505269	0.494298
C16996	1	1	1	0.701864	0.674846	0.768369	0.837911	0.729102	0.823702	0.703766	0.780351	0.742059
C17007	1	1	1	0.695993	0.69213	0.791184	0.718368	0.653649	0.662021	0.687951	0.754959	0.721455
C17008	1	1	1	0.834255	0.823092	1.58248	0.863538	0.928545	0.93015	0.831994	0.870293	0.851144
C17038	1	1	1	0.724008	0.396971	0.636928	0.233625	0.172097	0.0995072	0.17779	0.955746	0.566768
C17047	1	1	1	1.05679	0.547972	0.784629	0.400002	0.523424	0.258704	0.37596	0.825818	0.600889
C17050	1	1	1	0.545528	0.47319	0.694578	0.17531	0.138783	0.131525	0.537658	0.520397	0.529027
C17101	1	1	1	1.19999	1.13496	1.39069	1.0101	1.14588	0.997292	0.801224	0.851074	0.826149
C17103	1	1	1	0.412945	0.34857	0.550953	0.832046	0.289411	0.299195	0.381416	0.401286	0.391351
C17167	1	1	1	0.711145	0.673166	0.712536	0.506469	0.439121	0.443242	0.698198	0.756043	0.727121
C17168	1	1	1	0.875449	1.10333	1.46162	0.850664	0.711263	0.679108	0.69616	0.565735	0.630948
C17208	1	1	1	0.750111	0.723252	0.827044	0.761889	0.760217	0.772089	2.12675	0.762226	1.44449
C17220	1	1	1	0.868385	0.843821	0.907628	0.880746	0.921373	0.920268	0.844326	0.909833	0.877079
C17222	1	1	1	0.521684	0.416699	0.496521	0.267668	0.277813	0.258068	0.297409	0.471663	0.384536
C17224	1	1	1	2.64046	1.55722	0.558582	1.97439	2.20107	1.02389	2.14458	1.89635	2.02047
C17226	1	1	1	0.0260212	0.0229674	0.0341947	0.0172226	0.0153338	0.0156706	0.0216942	0.161219	0.0914568
C17233	1	1	1	0.605265	0.636408	0.673815	0.667908	0.760554	0.659575	0.70343	0.668399	0.685915
C17241	1	1	1	0.73029	0.686791	1.28489	0.451025	0.475717	0.36147	0.634194	0.71858	0.676387
C17251	1	1	1	3.06447	0.105815	1.4035	0.105493	0.092557	0.0956506	0.120732	0.743079	0.431905
C17309	1	1	1	3.33381	1.96147	3.66563	0.594938	0.534147	0.530738	0.72189	2.76821	1.74505
C17359	1	1	1	0.337974	1.14041	18.9711	0.0509532	0.160745	0.0542509	0.311195	0.844253	0.577724
C17362	1	1	1	0.475883	0.514723	0.379676	0.183326	0.174587	0.174237	3.83808	0.25097	2.04452
C17370	1	1	1	1.41019	0.670609	1.21317	2.12225	1.61743	0.892069	1.12883	0.832373	0.980602
C17391	1	1	1	1.00519	0.996594	1.07567	0.513506	0.373379	0.397562	0.412216	1.12699	0.769602
C17397	1	1	1	2.77923	1.74899	0.654515	2.07329	0.726827	3.84583	2.39801	0.562223	1.48012
C17399	1	1	1	0.258266	0.252455	0.241957	0.256832	0.259022	0.257403	0.249976	0.256787	0.253382
C17403	1	1	1	1.40947	1.57513	2.94282	0.717709	0.604575	0.593486	0.808784	0.705893	0.757339
C17444	1	1	1	0.665149	0.533843	0.75396	0.255974	0.175961	0.176258	0.455487	0.550293	0.50289
C17450	1	1	1	0.633514	0.545658	0.888266	0.468152	0.45254	0.453226	0.513093	0.65135	0.582221
C17452	1	1	1	0.864599	0.848416	0.929799	0.906074	0.87922	0.937252	0.87686	0.944891	0.910876
C17476	1	1	1	0.680335	0.497394	0.641995	0.304187	0.287001	0.230198	0.395347	0.709063	0.552205
C17489	1	1	1	0.950004	0.982968	1.05682	0.672403	0.690108	0.908995	1.12972	1.20419	1.16695
C17507	1	1	1	0.271653	0.177702	0.216581	0.14017	0.141101	0.13642	2.3065	1.06469	1.68559
C17533	1	1	1	0.568779	0.502027	1.20546	0.352789	0.337956	0.342533	0.474198	0.572311	0.523255
C17540	1	1	1	1.07608	0.982466	1.13627	1.49575	0.32255	0.333652	1.15659	1.44227	1.29943
C17547	1	1	1	1.17514	0.775807	0.977829	0.578023	0.334688	0.120452	0.298919	1.72348	1.0112
C17569	1	1	1	0.730418	0.739292	0.75648	0.679449	0.68865	0.690725	0.847756	0.748419	0.798088
C17575	1	1	1	0.737293	0.722766	0.735411	0.786893	0.747666	0.772842	0.705932	0.672966	0.689449
C17614	1	1	1	2.35685	2.618	1.4258	0.574636	0.464547	0.248093	0.135015	2.96552	1.55027
C17619	1	1	1	0.682005	0.681957	0.944367	0.628273	0.588718	0.558569	0.662645	0.729145	0.695895
C17685	1	1	1	0.735833	0.677277	0.719788	0.556287	0.519697	0.498021	0.692801	0.744884	0.718843
C17702	1	1	1	0.646267	0.868202	3.09673	1.13444	6.52137	4.92981	0.765021	5.30577	3.0354
C17703	1	1	1	0.723761	0.712652	0.754111	1.16052	1.74589	2.69558	0.708407	0.777424	0.742915
C17705	1	1	1	2.02411	2.21944	1.65364	0.711255	0.0668022	0.0642838	0.118472	2.98138	1.54993
C17710	1	1	1	0.741885	0.391843	0.47404	0.0859277	0.0222008	0.0532161	0.268234	0.793954	0.531094
C17715	1	1	1	12.3378	6.50472	3.60495	4.34784	1.30528	0.980401	2.52516	14.2638	8.39446
C17770	1	1	1	0.828499	0.70246	0.800252	0.349681	0.294976	0.279049	0.155216	0.842202	0.498709
C17816	1	1	1	0.197183	0.163568	0.211473	0.0881358	0.081201	0.0824612	2.00232	0.24918	1.12575
C17854	1	1	1	0.85734	0.825326	0.891336	0.872917	0.878007	0.878608	0.958616	0.830539	0.894578
C17868	1	1	1	1.03033	1.13187	0.258797	0.365328	0.10737	0.137115	1.19695	0.444838	0.820893
C17877	1	1	1	0.84961	0.826695	0.874437	0.613883	0.69776	0.606571	0.503049	0.655288	0.579169
C17928	1	1	1	0.207528	0.242374	0.237611	0.263332	0.233264	0.267756	0.371756	1.00169	0.686721
C17938	1	1	1	0.876217	0.883216	1.01422	0.825467	0.953203	0.884816	0.733808	0.955881	0.844844
C17940	1	1	1	0.66224	0.672335	0.784553	0.686934	0.662446	0.684081	1.44364	0.671709	1.05768
C17944	1	1	1	0.901011	0.748919	0.564785	0.660963	0.0439826	0.439227	3.19103	1.15437	2.1727
C17948	1	1	1	1.72335	0.352534	5.07111	0.383018	0.550029	8.31381	0.679934	0.522349	0.601142
C17950	1	1	1	1.59819	1.72863	1.53725	0.615675	0.586326	0.585149	0.879045	0.800645	0.839845
C17954	1	1	1	0.0916829	0.0410123	0.0549649	0.0318317	0.0323293	0.0248218	1.36867	0.0558507	0.71226
C17958	1	1	1	1.20938	0.877802	1.26646	1.19815	0.219419	0.224987	0.537647	1.59386	1.06576
C17967	1	1	1	0.901511	0.87778	0.881814	0.893375	0.958069	0.911899	0.853405	0.87801	0.865708
C17972	1	1	1	0.555939	2.53157	2.65039	0.54063	0.526491	0.513624	1.2163	0.592162	0.904231
C17980	1	1	1	2.91161	2.42049	2.77214	1.08292	0.704244	0.67684	2.02358	3.22558	2.62458
C18012	1	1	1	1.14035	1.00184	7.34326	1.01034	1.14615	0.99753	0.799126	0.820284	0.809705
C18021	1	1	1	0.303045	0.3686	0.424886	0.400473	0.354745	0.442975	0.711663	0.53101	0.621337
C18032	1	1	1	1.24511	1.16132	1.15306	1.3754	1.24907	1.28598	0.688649	0.965079	0.826864
C18053	1	1	1	0.11559	0.106658	0.130639	0.0812958	0.075163	0.071951	0.165406	0.125508	0.145457
C18069	1	1	1	0.645251	0.595388	0.772253	0.454318	0.419576	0.401646	0.978745	0.790174	0.884459
C18081	1	1	1	1.28538	1.11591	1.48499	0.704986	0.567266	0.497503	0.580605	0.661765	0.621185
C18099	1	1	1	1.11179	1.11219	1.12916	0.922324	0.990247	0.851346	0.585486	0.96459	0.775038
C18128	1	1	1	9.64835	1.1687	1.84138	1.19915	0.444572	0.488234	0.908111	8.62879	4.76845
C18145	1	1	1	0.789118	0.647211	0.717761	0.350232	0.301438	0.290775	0.348942	0.779588	0.564265
C18178	1	1	1	0.61293	0.601542	3.15232	0.449376	0.432734	0.435911	0.81079	0.786029	0.798409
C18203	1	1	1	1.27274	0.775603	1.41452	0.447755	0.37438	0.467586	1.49601	0.702181	1.0991
C18213	1	1	1	0.583647	0.646325	1.11068	0.629228	0.601872	0.606416	0.719775	0.74971	0.734743
C18236	1	1	1	1.94174	1.59856	1.99391	1.35487	1.41492	1.47541	1.14558	0.912245	1.02892
C18241	1	1	1	0.721131	0.706719	0.918328	0.595547	0.618478	0.562437	0.684547	0.687947	0.686247
C18261	1	1	1	5.28567	5.23389	5.36356	0.781961	0.740806	0.514986	0.503065	0.520565	0.511815
C18281	1	1	1	0.755551	0.7116	0.777632	0.84184	0.845193	0.766136	0.595735	0.704933	0.650334
C18282	1	1	1	0.961215	0.960539	0.920749	1.6508	1.66382	1.67597	0.878329	0.843698	0.861014
C18299	1	1	1	0.651719	0.652716	0.623746	0.672458	0.687204	0.67369	0.65346	0.634703	0.644081
C18339	1	1	1	0.120424	0.110532	0.116571	0.110514	0.113631	0.242191	0.327756	1.29635	0.812054
C18363	1	1	1	0.762249	0.718589	0.840585	0.669147	0.670993	0.674969	0.711868	0.725311	0.718589
C18374	1	1	1	0.828655	0.916926	1.06651	0.839502	1.0345	0.899305	0.727866	0.88749	0.807678
C18377	1	1	1	0.975689	0.952681	0.905302	0.76803	0.767794	0.81709	0.404352	0.917843	0.661098
C18390	1	1	1	1.06723	0.943382	0.73733	0.177574	0.128967	0.0411645	0.0611313	1.57847	0.819799
C18399	1	1	1	1.00829	0.994875	1.10934	0.987894	0.956389	0.955695	1.02212	1.10481	1.06347
C18409	1	1	1	0.737133	0.643216	0.954017	0.197533	0.166113	0.157193	0.55948	0.740801	0.65014
C18412	1	1	1	3.83962	3.99722	3.7438	0.245638	0.252059	0.13912	0.0527175	0.826164	0.439441
C18416	1	1	1	0.593499	0.462759	0.548896	0.185739	0.121308	0.134054	0.405047	0.583489	0.494268
C18435	1	1	1	0.0205219	0.0199377	0.0439084	0.0206591	0.0191134	0.0264777	0.664575	0.633479	0.649027
C18445	1	1	1	0.71231	0.703411	0.721736	0.935569	0.730029	0.662892	0.6256	0.73292	0.67926
C18457	1	1	1	0.735635	0.725792	0.730984	0.761457	1.97245	0.820194	1.16353	0.883268	1.0234
C18461	1	1	1	0.669853	0.63974	0.707843	0.694258	0.637442	0.661678	0.824869	0.639547	0.732208
C18463	1	1	1	0.322449	0.324104	0.21324	0.399827	0.487815	0.42144	0.436576	1.05756	0.747069
C18488	1	1	1	0.403514	0.731625	0.475019	0.705434	0.503583	0.20248	0.404272	1.09719	0.750731
C18495	1	1	1	0.00834211	0.0248363	0.0127465	0.0636878	0.00725091	0.00748014	0.0387769	0.284175	0.161476
C18499	1	1	1	1.17341	4.04941	3.69662	0.0308206	0.0290081	0.0286344	0.0755814	0.11397	0.0947757
C18511	1	1	1	0.191578	0.187097	0.222901	0.16663	0.165443	0.159097	1.90024	0.193383	1.04681
C18514	1	1	1	1.19999	22.1357	1.39069	5.62621	1.14588	0.997292	0.798936	0.851074	0.825005
C18542	1	1	1	0.699773	0.626324	0.715747	0.64576	0.665501	0.668866	0.842747	0.652858	0.747803
C18544	1	1	1	0.317233	0.383467	0.485523	0.543639	1.52684	0.600058	0.917875	0.626996	0.772435
C18547	1	1	1	0.798978	0.800625	2.88755	0.577299	0.606187	0.478391	0.466691	0.599053	0.532872
C18557	1	1	1	0.774741	0.530163	0.745714	0.101782	0.27289	0.225582	1.00809	0.408423	0.708256
C18560	1	1	1	0.814215	0.275372	0.819145	0.534437	0.389543	0.211009	0.212986	0.257871	0.235429
C18573	1	1	1	0.821304	0.821444	0.77708	0.881952	0.887444	0.918653	0.898456	0.842835	0.870646
C18581	1	1	1	0.790326	0.76901	0.910889	0.571047	0.649071	0.564245	0.537159	0.609563	0.573361
C18592	1	1	1	0.614664	0.567877	1.23513	0.388773	0.411381	0.406385	0.541959	0.830744	0.686352
C18600	1	1	1	1.10405	1.11035	1.12976	1.87995	1.01424	0.874909	0.581155	0.957455	0.769305
C18603	1	1	1	2.00733	2.14345	4.18921	0.560287	0.306115	0.292346	0.519242	0.661256	0.590249
C18613	1	1	1	2.04301	0.841067	1.44383	0.568986	0.446876	0.380608	0.477449	0.544226	0.510838
C18615	1	1	1	1.39633	1.56044	1.41187	0.711017	0.598938	0.53609	0.801243	0.699518	0.750381
C18651	1	1	1	1.06221	0.954255	0.928726	0.643631	0.649924	0.603541	0.676363	0.812634	0.744499
C18659	1	1	1	1.0419	1.14064	1.54548	0.878958	1.09387	1.00362	0.799979	0.863922	0.83195
C18663	1	1	1	0.84402	0.839156	0.911349	0.855125	0.888401	0.887147	0.950155	0.843889	0.897022
C18667	1	1	1	1.07202	1.95212	1.46484	1.76768	1.80983	3.30979	3.77174	0.561408	2.16657
C18692	1	1	1	0.759004	0.638637	0.793145	0.474149	0.407751	0.420531	0.620299	0.765868	0.693084
C18704	1	1	1	0.621229	0.649053	4.91541	0.411276	0.38896	0.384237	0.512422	0.785468	0.648945
C18731	1	1	1	0.239051	0.238833	0.292547	0.150884	0.121409	0.0941635	0.145707	0.626713	0.38621
C18741	1	1	1	1.18455	1.53635	1.7424	0.858051	0.673905	0.578546	0.720011	0.820713	0.770362
C18744	1	1	1	0.628179	0.618124	0.64556	0.619077	0.677665	0.736654	2.6104	0.761473	1.68594
C18745	1	1	1	0.878877	1.01058	0.956486	0.567893	0.645486	0.561129	0.624735	0.606196	0.615466
C18749	1	1	1	1.5629	1.7466	1.53261	0.598044	0.595658	0.572231	0.896829	0.782738	0.839784
C18750	1	1	1	0.813354	0.790796	0.959471	0.672781	0.747863	0.694208	0.57573	0.749964	0.662847
C18760	1	1	1	0.759655	0.695917	0.189913	0.502213	0.102512	0.270006	1.90869	1.29945	1.60407
C18780	1	1	1	0.718437	0.676624	1.67298	0.610538	0.619625	0.592466	0.702858	0.773393	0.738126
C18781	1	1	1	0.257348	0.245205	0.387133	0.321436	0.29588	0.586286	0.412721	0.23392	0.32332
C18793	1	1	1	0.857393	0.985881	0.933105	0.554011	0.589721	0.500257	0.609464	0.591378	0.600421
C18801	1	1	1	0.0520235	0.127546	0.0744241	0.0386	0.0310594	0.0240894	0.200431	1.3595	0.779968
C18818	1	1	1	1.36642	1.17865	1.21359	0.346576	0.318136	0.280944	0.506582	1.32689	0.916738
C18831	1	1	1	0.391203	0.403375	0.407819	0.397585	0.407809	0.440723	1.91981	0.407739	1.16377
C18846	1	1	1	0.558301	0.367432	0.423841	0.174109	0.19222	0.175249	0.0318012	0.773189	0.402495
C18852	1	1	1	0.73029	0.686791	1.28489	0.451025	0.475717	0.36147	7.89667	1.83762	4.86715
C18853	1	1	1	0.237226	0.229893	1.29003	0.244288	0.240592	0.249782	0.230339	0.232405	0.231372
C18857	1	1	1	0.939185	0.777304	0.866242	0.420599	0.329471	0.30979	0.408117	1.0121	0.710108
C18877	1	1	1	0.762151	0.634734	0.592089	0.40422	0.360994	0.331272	0.527234	0.468476	0.497855
C18889	1	1	1	0.70371	0.581654	0.825342	0.214587	0.188116	0.166527	0.616334	0.844881	0.730607
C18898	1	1	1	0.674149	0.670797	0.373499	0.744717	0.726292	0.733446	0.703919	0.642377	0.673148
C18921	1	1	1	0.815665	0.778939	0.812086	0.836857	0.822379	0.836716	0.812799	0.826099	0.819449
C18923	1	1	1	0.514477	0.504719	0.600055	0.517035	0.500391	0.505173	0.910184	0.525804	0.717994
C18934	1	1	1	1.0832	1.21793	1.48317	0.75551	0.636417	0.624744	0.771495	0.613982	0.692739
C18935	1	1	1	0.675337	0.637673	0.721719	0.334912	0.242939	0.262574	0.871041	0.65097	0.761006
C19013	1	1	1	0.822538	0.846886	0.959506	0.775375	0.95548	0.83061	0.688853	0.897321	0.793087
C19015	1	1	1	0.85729	0.79033	1.24576	0.545427	0.604165	0.578006	0.708343	0.729708	0.719025
C19026	1	1	1	0.924671	0.83845	1.5324	0.65522	0.737258	0.675329	0.680467	0.686843	0.683655
C19031	1	1	1	1.0967	1.09228	1.05079	1.01974	1.07409	1.05358	0.822352	0.863291	0.842821
C19032	1	1	1	2.75668	1.15259	0.489821	5.90044	0.668114	1.09473	0.33147	0.394801	0.363136
C19052	1	1	1	0.807507	0.686791	1.28489	0.50761	0.475717	0.373666	0.634194	0.71858	0.676387
C19075	1	1	1	1.09674	0.98585	2.57959	0.918122	0.655422	0.675766	0.663631	0.734594	0.699112
C19092	1	1	1	0.565451	0.510698	0.537979	0.389854	0.507896	0.433746	0.303349	0.393117	0.348233
C19098	1	1	1	1.11487	1.15241	1.1907	1.05448	0.987694	1.19548	1.22278	1.16155	1.19216
C19119	1	1	1	0.581312	0.312917	0.350563	0.299547	0.294054	0.300442	1.87926	1.21595	1.54761
C19128	1	1	1	1.09694	1.19146	4.95128	7.76182	5.60709	3.1061	0.677772	1.81786	1.24782
C19131	1	1	1	1.29777	0.515929	1.21099	1.43527	0.565659	1.33115	0.723042	1.57652	1.14978
C19136	1	1	1	0.622033	0.598421	0.693815	0.472184	0.445601	0.441263	0.646055	0.650612	0.648334
C19137	1	1	1	1.0713	1.15874	1.18456	0.517147	0.476027	0.434645	0.614737	0.564979	0.589858
C19138	1	1	1	2.55006	8.99988	9.33487	4.47552	6.20749	4.95895	12.9681	7.0146	9.99134
C19147	1	1	1	1.65005	0.239484	0.488233	0.862483	0.865953	1.18527	0.953153	0.198369	0.575761
C19158	1	1	1	3.11393	3.07699	1.36944	2.52032	0.720812	1.32668	0.589862	2.48034	1.5351
C19173	1	1	1	20.5444	12.7872	24.7052	48.9378	81.6433	42.8786	1.05082	23.8619	12.4564
C19174	1	1	1	0.731568	0.614739	0.795817	0.479603	0.44959	0.454307	0.78191	0.680502	0.731206
C19181	1	1	1	1.52003	2.60973	9.63039	1.35463	7.82188	10.0783	0.741191	0.340238	0.540715
C19194	1	1	1	0.868385	0.83041	0.907628	0.880746	0.921373	0.920268	0.844326	0.909833	0.877079
C19205	1	1	1	0.973176	1.06773	0.995403	2.89853	3.18996	3.36155	1.0573	0.844327	0.950813
C19218	1	1	1	0.561687	0.54617	0.542066	0.587384	0.574656	0.582152	1.02972	0.571202	0.800461
C19243	1	1	1	0.728236	0.635877	0.76514	0.454929	0.399135	0.403484	0.663667	0.753614	0.70864
C19247	1	1	1	0.340306	0.364127	0.342851	0.33624	0.560242	0.390829	0.35752	0.380785	0.369152
C19266	1	1	1	0.0509719	0.0385778	0.0577026	0.018317	0.0109905	0.0108525	0.0314544	0.0427569	0.0371057
C19272	1	1	1	1.77125	1.48936	0.384369	1.97825	0.487232	1.22305	0.337005	1.03032	0.683664
C19282	1	1	1	1.12528	0.461207	2.07079	0.207729	0.299271	0.220818	0.22396	0.178777	0.201369
C19283	1	1	1	2.43245	1.93538	0.30844	0.166255	0.156017	0.302685	0.11981	0.198424	0.159117
C19284	1	1	1	0.502526	3.69871	0.410743	3.70675	0.797543	0.876477	0.278352	0.400921	0.339636
C19303	1	1	1	1.21858	1.04548	1.58404	0.885195	0.82845	0.748905	1.34532	0.708249	1.02678
C19310	1	1	1	1.21043	1.28737	1.42962	0.67663	0.500081	0.553478	1.75529	1.36246	1.55888
C19326	1	1	1	1.00264	1.62222	0.830114	2.00237	1.34591	1.31736	0.893358	0.660352	0.776855
C19333	1	1	1	1.2353	1.44803	1.71786	1.859	0.583448	1.594	0.137216	1.11329	0.625254
C19350	1	1	1	0.913406	0.899075	1.207	0.541289	0.50276	0.428196	0.662581	0.666324	0.664453
C19380	1	1	1	0.128171	0.118667	0.164524	0.111694	0.109667	0.110854	0.125151	0.127629	0.12639
C19391	1	1	1	23.392	14.1429	21.6372	0.56736	0.540314	0.53923	1.87077	0.737815	1.30429
C19392	1	1	1	0.556204	0.511942	0.536246	0.419276	0.390845	0.359855	0.523677	0.563045	0.543361
C19400	1	1	1	0.611629	0.639024	2.74273	0.40492	0.382949	0.378299	0.504503	0.77333	0.638917
C19409	1	1	1	0.634727	0.598763	1.43288	0.454508	0.578253	0.573061	5.13105	0.961608	3.04633
C19429	1	1	1	1.40123	1.48372	2.50848	1.40361	1.6062	1.85762	1.34946	1.49925	1.42435
C19434	1	1	1	2.62021	2.26412	9.82949	0.488575	0.431119	0.280367	2.65391	0.474909	1.56441
C19444	1	1	1	1.49064	9.06759	10.142	3.06717	3.06545	1.3165	0.551146	1.23754	0.894344
C19461	1	1	1	1.0535	0.933867	0.935445	0.64501	0.517073	0.587882	0.685174	1.02498	0.855079
C19482	1	1	1	1.26268	1.0566	2.43613	0.919797	1.25493	1.10146	0.775515	0.918539	0.847027
C19485	1	1	1	0.79889	0.630454	0.940248	0.2351	0.180351	0.179604	0.602596	1.23794	0.920267
C19488	1	1	1	0.152009	0.141183	0.165358	1.53473	1.03273	1.03767	1.52586	0.164682	0.845272
C19506	1	1	1	0.343304	0.621022	0.736561	0.110027	0.109679	0.131994	1.84284	0.751564	1.2972
C19508	1	1	1	1.25347	1.23358	1.20915	0.923412	79.1628	7.44357	0.640924	1.88792	1.26442
C19518	1	1	1	0.71466	0.689447	0.723494	0.75287	0.781722	0.688559	0.663144	0.69414	0.678642
C19524	1	1	1	1.22245	0.98771	1.46434	0.673441	0.630614	0.653598	0.653177	0.677847	0.665512
C19526	1	1	1	4.45573	3.15343	3.18108	5.17562	5.22256	6.7705	1.58578	0.523287	1.05453
C19530	1	1	1	0.68151	0.654336	0.688242	1.69615	1.09746	2.41999	0.708773	0.788457	0.748615
C19535	1	1	1	1.53964	1.49881	0.927695	1.11438	2.25122	2.2082	0.228307	1.29071	0.759506
C19545	1	1	1	1.10281	1.4258	1.61702	0.823113	0.688227	0.657113	0.681915	0.803942	0.742929
C19548	1	1	1	0.366652	1.06108	0.257608	0.225629	0.296037	0.208873	0.427292	0.18693	0.307111
C19556	1	1	1	0.29852	2.12692	2.09693	1.43408	1.07766	1.13988	2.07481	0.364272	1.21954
C19615	1	1	1	2.1047	1.66636	1.95631	0.581732	0.290267	0.33427	1.14971	2.51129	1.8305
C19659	1	1	1	1.84849	3.01385	1.83637	2.33927	3.26118	1.59343	0.866563	3.6481	2.25733
C19691	1	1	1	1.04791	0.111743	0.34159	0.822491	0.253362	0.152801	0.254686	0.595466	0.425076
C19705	1	1	1	0.236694	0.196343	0.253848	0.104364	0.0967503	0.0989846	2.11483	0.29911	1.20697
C19783	1	1	1	1.15364	0.872921	0.796838	0.962439	1.35303	1.37405	1.93562	0.612856	1.27424
C19786	1	1	1	0.635547	0.5494	0.689709	0.478654	0.455095	0.4536	0.513599	0.651887	0.582743
C19798	1	1	1	3.63182	2.73854	4.08235	0.752111	0.616168	0.55987	1.96434	4.76858	3.36646
C19891	1	1	1	0.717607	0.703483	1.07127	0.603191	0.597896	0.59098	0.66565	0.681331	0.673491
C19892	1	1	1	1.54859	1.14247	1.14301	0.806443	0.604534	0.615149	0.0175523	1.48263	0.750091
C19907	1	1	1	0.323725	1.95357	0.204966	1.21581	0.814366	1.29768	0.549437	0.23407	0.391754
C19910	1	1	1	1.47277	1.59297	1.17503	0.56736	0.540314	0.53923	0.845109	0.776704	0.810907
C19915	1	1	1	0.66384	0.739641	0.689602	0.644232	0.703779	0.680724	0.752775	0.747995	0.750385
C19916	1	1	1	1.41052	1.66831	2.02412	1.02992	1.25009	1.27247	1.9273	3.63856	2.78293
C19917	1	1	1	0.841472	0.803125	0.895905	0.896827	0.904175	0.867451	0.987187	0.849281	0.918234
C19949	1	1	1	0.68279	0.716681	0.72415	0.660891	0.678775	0.613719	0.733528	0.726756	0.730142
C19953	1	1	1	0.662635	0.93338	0.691532	2.77927	0.750432	1.09034	0.450944	1.17852	0.814731
C19954	1	1	1	0.353762	0.337239	22.0768	0.228863	0.241236	0.221384	2.55849	0.352152	1.45532
C19990	1	1	1	0.862424	0.857218	1.49513	0.926562	0.910853	0.902609	0.865145	0.863543	0.864344
C19998	1	1	1	1.17693	0.95755	45.1734	3.00284	2.77892	1.13873	0.902162	3.16604	2.0341
C20021	1	1	1	0.851976	0.813702	0.840938	0.436318	0.437977	0.673989	0.898996	1.24656	1.07278
C20045	1	1	1	0.161595	0.181369	0.212426	0.140318	0.324797	0.457179	1.63417	0.211557	0.922863
C20125	1	1	1	0.783031	0.660918	0.759469	0.362594	1.79919	0.370783	0.130226	0.742424	0.436325
C20144	1	1	1	0.442925	0.422237	0.47829	0.283812	0.302038	0.277182	2.04879	0.433827	1.24131
C20231	1	1	1	0.724325	0.573489	0.84267	0.311205	0.224357	0.230803	0.495744	0.622645	0.559195
C20239	1	1	1	0.352335	0.359782	0.400236	0.37192	0.401197	0.373737	4.09875	0.404	2.25137
C20268	1	1	1	0.0820271	0.0780718	0.790403	0.058544	0.0539579	0.0532683	0.0691614	0.189615	0.129388
C20286	1	1	1	7.01124	5.62288	6.60335	1.02612	1.02762	0.993381	0.781725	0.864576	0.823151
C20314	1	1	1	0.721137	0.669329	0.7117	0.848329	0.77262	0.803899	0.711602	0.711858	0.71173
C20316	1	1	1	2.00976	1.63499	1.58033	1.96482	1.90113	1.96311	1.40527	2.10197	1.75362
C20340	1	1	1	0.358871	0.27922	0.24371	0.21323	0.196153	0.202785	0.18771	0.186029	0.186869
C20351	1	1	1	1.99914	1.63759	2.36739	0.146657	0.144805	0.143223	0.262316	1.45098	0.856648
C20380	1	1	1	0.84647	0.667932	0.746174	0.307414	0.238325	0.222038	0.550132	0.812203	0.681167
C20396	1	1	1	0.638087	0.473477	0.55922	0.710811	0.495518	2.08622	0.485554	0.700851	0.593203
C20417	1	1	1	0.700089	0.727344	0.791353	0.727727	0.625652	0.680702	0.748178	0.743318	0.745748
C20424	1	1	1	0.747326	0.59655	0.722462	0.589195	0.585895	0.561459	0.775841	0.765309	0.770575
C20441	1	1	1	0.322989	1.66733	0.669079	0.27875	0.190508	0.215265	0.873453	1.01136	0.942405
C20452	1	1	1	1.28131	0.954781	1.32245	0.28627	0.220979	0.224987	0.537647	1.59386	1.06576
C20515	1	1	1	0.650907	0.619952	0.788874	0.880364	0.592066	0.918483	0.650564	0.593687	0.622125
C20517	1	1	1	0.558049	1.04803	0.845083	0.356157	0.30538	0.287238	0.747718	0.497407	0.622562
C20543	1	1	1	2.83884	2.36	2.70286	8.79587	8.61909	9.43435	1.97301	3.14497	2.55899
C20545	1	1	1	0.811071	0.682447	0.830404	0.506675	0.435722	0.420103	0.662851	0.818406	0.740629
C20546	1	1	1	0.46915	0.379749	0.439928	0.378986	0.403576	0.417815	1.27711	0.174084	0.725598
C20552	1	1	1	0.816403	0.794468	108.128	0.819617	0.818941	0.848113	1.69737	0.83728	1.26733
C20554	1	1	1	0.475703	0.40525	0.480797	0.388822	0.349332	0.380723	2.47777	0.436062	1.45691
C20651	1	1	1	1.61457	1.45621	1.32446	1.69064	1.83831	1.85164	0.427042	1.5196	0.973319
C20669	1	1	1	0.733131	0.689463	1.28988	0.452779	0.477567	0.362876	0.636661	0.733662	0.685161
C20692	1	1	1	1.42858	1.41213	1.39849	1.34166	1.369	1.26508	0.529095	1.40116	0.965127
C20701	1	1	1	1.58944	0.441996	1.2924	0.565812	0.195868	0.453849	1.34399	2.78895	2.06647
C21201	1	1	1	0.318532	0.128213	0.408181	0.444147	0.829096	1.99316	0.126183	0.122064	0.124123
C21217	1	1	1	0.929686	0.539941	1.09725	0.633565	0.510689	0.501579	0.223302	1.12477	0.674036
C21247	1	1	1	1.70757	1.57127	1.22028	0.526301	0.42172	0.290306	0.374279	6.36454	3.36941
C21283	1	1	1	0.0843083	0.207283	3.12463	0.0745445	0.227365	0.0955545	0.568721	0.8163	0.692511
C21289	1	1	1	5.60303	4.39854	1.09778	0.499149	0.454933	0.397508	0.622994	0.572568	0.597781
C21304	1	1	1	1.53468	1.49364	1.65088	1.11792	0.922165	0.945056	2.14614	2.05361	2.09987
C21542	1	1	1	2.19598	1.82557	2.09078	1.0549	0.545531	0.510482	1.52621	0.353844	0.940027
C21551	1	1	1	0.763089	0.743666	0.781526	0.652404	0.634885	0.593477	0.976896	0.719557	0.848226
C21557	1	1	1	0.893771	0.876287	9.90637	0.921647	0.914067	0.93845	0.890408	0.922106	0.906257
C21793	1	1	1	0.976564	0.917866	0.941161	0.730563	0.633289	0.629178	0.709855	0.993496	0.851676
C22163	1	1	1	0.716561	0.721017	0.727369	0.677443	0.713694	0.67549	0.730302	0.737125	0.733714
C22165	1	1	1	0.284283	0.310408	0.329386	0.292788	0.319297	0.286494	1.91267	0.457811	1.18524
C22170	1	1	1	0.227274	0.217725	0.216326	0.220973	0.211675	0.210667	0.407128	7.69282	4.04998
C22189	1	1	1	0.698861	0.704416	2.91335	0.718671	0.643909	0.66092	0.861712	0.843162	0.852437
D02982	1	1	1	0.69807	0.616145	1.30126	0.462031	0.433407	0.428145	0.58199	0.875225	0.728607
HMDB0000349	1	1	1	0.871488	0.836324	1.12157	0.451814	0.300041	0.302408	0.62476	0.941774	0.783267
HMDB0000439	1	1	1	1.06092	2.53071	2.38326	3.22044	2.44062	2.57393	1.77301	1.92458	1.84879
HMDB0000706	1	1	1	0.677661	2.71763	0.999327	4.54739	4.88123	4.89848	0.744704	0.791264	0.767984
HMDB0001417	1	1	1	1.12761	1.25626	1.01847	0.543461	0.485827	0.472166	0.419729	0.529743	0.474736
HMDB0001538	1	1	1	0.176078	0.282916	0.672443	0.298445	0.288776	0.281107	1.16154	0.525324	0.843434
HMDB0002091	1	1	1	0.814116	0.849029	0.798657	0.884434	0.92435	0.929088	0.887867	0.846484	0.867176
HMDB0010347	1	1	1	1.04729	0.928362	0.967411	0.641208	0.514025	0.584416	0.681135	1.01894	0.850039
HMDB0013078	1	1	1	0.871872	0.798117	0.900204	0.679277	0.717379	0.63761	0.830046	0.862893	0.846469
HMDB0013158	1	1	1	0.696796	0.363934	0.452302	0.113913	0.0412428	0.0488455	0.182609	0.730385	0.456497
HMDB0013659	1	1	1	0.126648	0.135513	0.124568	0.13336	0.135193	0.134903	4.53448	0.171383	2.35293
HMDB0028699	1	1	1	0.847757	0.707345	0.809478	0.523148	0.46797	0.638849	1.29945	0.691934	0.995692
HMDB0031511	1	1	1	5.6364	7.56724	5.61334	6.41103	2.7832	4.1307	0.70363	3.02803	1.86583
HMDB0032024	1	1	1	1.05589	0.233557	0.436291	0.386013	0.46973	0.4142	1.70568	0.500057	1.10287
HMDB0033115	1	1	1	0.728898	0.626273	1.69975	0.606288	0.611076	0.562207	0.677763	0.685398	0.681581
HMDB0034315	1	1	1	1.47277	1.59297	1.17503	0.56736	0.540314	0.53923	0.845109	0.776704	0.810907
HMDB0040991	1	1	1	1.30913	0.776317	1.11757	0.19344	0.129846	0.103786	0.189815	1.03408	0.611946
HMDB0250338	1	1	1	1.31807	1.24664	26.4076	1.06127	1.00622	1.00719	0.816842	0.934817	0.87583
HMDB0253028	1	1	1	0.893942	2.34563	2.91243	0.18902	0.119655	0.104606	0.172701	0.180741	0.176721
HMDB0253945	1	1	1	0.603972	0.533223	0.69007	0.444318	0.424673	0.40997	1.09543	0.627185	0.861306
HMDB0254339	1	1	1	0.346571	0.373787	3.20863	0.385379	0.548726	0.929934	0.739554	1.61016	1.17486
HMDB0254500	1	1	1	0.939029	0.95461	0.98853	0.954788	1.20035	1.09918	0.850281	0.912906	0.881593
HMDB0254869	1	1	1	0.8696	0.718422	1.61837	0.900371	0.852359	0.615608	0.807328	0.833451	0.82039
HMDB0303857	1	1	1	0.859829	0.735585	1.06273	0.685677	0.664869	0.680975	0.898363	4.19317	2.54577
HMDB0304500	1	1	1	0.908615	0.502937	0.820613	0.420448	0.409049	0.796448	0.391509	0.496114	0.443812
